# Supplementary material for: Elevated pyramidal cell firing orchestrates arteriolar vasoconstriction through COX-2-derived prostaglandin E2 signaling
Source: eLife. 2025 Apr 23;13:RP102424. doi: 10.7554/eLife.102424 (PMC12017770; doi:10.7554/eLife.102424)
Supplement: Figure 1—figure supplement 1—source data 1. [file elife-102424-fig1-figsupp1-data1.xlsx]

## Sheet: CTRL
Stimulation	Couche I
Time (s)	BGBV-020_0000	BGBV-021_0000	BGBV-022_0000
0	10.4	12.5666	10.6166
1	10.4	12.7833	10.4
2	10.6166	12.7833	10.1833
3	10.4	12.5666	10.1833
4	10.4	12.7833	10.4
5	10.1833	12.7833	10.1833
6	10.4	12.5666	10.6166
7	10.4	12.35	10.6166
8	10.4	12.5666	10.4
9	10.4	12.5666	10.4
10	10.4	12.7833	10.6166
11	10.4	12.7833	10.1833
12	10.1833	12.7833	10.1833
13	10.4	12.7833	10.1833
14	10.4	12.7833	10.6166
15	10.4	12.5666	10.6166
16	10.4	12.7833	10.4
17	10.1833	12.7833	10.4
18	10.4	12.7833	10.4
19	10.4	13	10.6166
20	10.4	12.7833	10.1833
21	10.1833	13	10.1833
22	10.6166	13.2166	10.4
23	10.4	12.7833	10.4
24	10.4	12.7833	10.1833
25	10.4	13	10.4
26	10.4	12.7833	10.4
27	10.4	13	10.4
28	10.4	12.7833	10.1833
29	10.4	12.7833	10.1833
30	10.4	13	10.4
31	10.4		10.1833
32	10.4		10.1833
33	10.1833		10.4
34	10.1833		10.4
35	10.4		10.4
36	10.1833		10.1833
37	10.1833		9.96663
38	10.4		10.4
39	10.4		10.6166
40	10.1833		10.4
41	10.4	13	9.96663
42	10.4	12.7833	10.1833
43	10.4	13	10.1833
44	10.4	13	10.1833
45	10.1833	13	10.1833
46	10.4	13	10.1833
47	10.4	12.7833	10.1833
48	10.4	12.7833	10.6166
49	10.4	13.2166	10.4
50	10.4	12.7833	10.1833
51	10.1833	12.7833	10.4
52	10.4	13	10.1833
53	10.1833	13	10.4
54	10.1833	12.7833	10.6166
55	10.1833	12.7833	10.4
56	10.1833	12.7833	9.96663
57	10.1833	12.5666	9.96663
58	10.1833	13	9.96663
59	10.1833	13	10.1833
60	10.1833	13	10.4
61	10.4	13	10.1833
62	10.4	12.7833	10.1833
63	10.4	13	10.6166
64	10.4	13	10.4
65	10.1833	13	10.1833
66	10.4	13	10.6166
67	10.4	13	10.1833
68	10.4	13	10.4
69	10.4	13	10.4
70	10.4	13	10.1833
71	10.4	13	10.4
72	10.4	12.7833	10.1833
73	10.4	12.7833	10.4
74	10.4	13	10.1833
75	10.6166	13.2166	9.96663
76	10.4	13	10.4
77	10.4	13	9.96663
78	10.4	12.7833	10.1833
79	10.4	12.7833	10.1833
80	10.4	13	10.1833
81	10.4	12.7833	10.4
82	10.4	13	10.4
83	10.4	12.7833	10.6166
84	10.4	12.7833	10.4
85	10.4	12.7833	9.96663
86	10.4	12.5666	10.1833
87	10.4	13	10.1833
88	10.4	12.7833	10.1833
89	10.4	13	10.6166
90	10.4	13	10.4
91	10.6166	13	10.6166
92	10.1833	13	10.1833
93	10.1833	13	10.1833
94	10.1833	13	10.1833
95	10.1833	13	10.4
96	10.1833	13	10.4
97	10.1833	13	10.4
98	10.4	13	10.4
99	10.1833	13	10.4
100	10.4	13	10.4
101	10.1833	13	10.1833
102	10.1833	13	10.4
103	10.4	12.7833	10.6166
104	10.4	13	10.4
105	10.1833	13	10.6166
106	10.4	13	10.6166
107	10.4	13.2166	10.4
108	10.4	13	10.1833
109	10.6166	13.2166	10.4
110	10.4	12.7833	10.4
111	10.4	13	10.1833
112	10.1833	13.2166	9.96663
113	10.4	13	10.6166
114	10.1833	12.7833	10.1833
115	10.4	13	10.4
116	10.4	13	10.6166
117	10.6166	12.7833	10.4
118	10.4	12.7833	10.4
119	10.6166	13	10.4
120	10.6166	12.7833	10.1833
121	10.4	13.2166	10.4
122	10.6166	13.2166	10.4
123	10.6166	13.2166	10.1833
124	10.6166	13	10.4
125	10.4	13.2166	10.4
126	10.6166	13	9.96663
127	10.4	13.2166	10.6166
128	10.6166	13	10.6166
129	10.6166	13.2166	10.4
130	10.6166	13.2166	9.96663
131	10.4	13	10.1833
132	10.6166	13.2166	10.1833
133	10.4	13.2166	10.4
134	10.1833	12.7833	10.1833
135	10.4	13	10.4
136	10.6166	13.2166	10.4
137	10.6166	13	10.4
138	10.6166	13	10.4
139	10.6166	13	10.4
140	10.4	13	10.1833
141	10.6166	13	10.1833
142	10.6166	13	10.4
143	10.4	13	10.4
144	10.6166	13.2166	10.6166
145	10.4	13	10.1833
146	10.4	13	10.4
147	10.1833	13.2166	10.4
148	10.4	13	10.1833
149	10.1833	13.2166	10.4
150	10.6166	12.7833	10.1833
151	10.1833	13	10.4
152	10.4	13	10.6166
153	10.1833	13	10.4
154	10.1833	13	10.1833
155	10.1833	13	10.1833
156	10.1833	12.7833	10.1833
157	10.4	13	10.1833
158	10.4	13	10.1833
159	10.6166	12.5666	10.1833
160	10.4	13	9.96663
161	10.1833	13	10.4
162	10.6166	13	10.1833
163	10.4	13	10.1833
164	10.4	13.4333	10.4
165	10.1833	13.2166	10.4
166	10.4	13	10.6166
167	10.4	13	10.6166
168	10.1833	13.2166	10.6166
169	10.4	13.2166	9.96663
170	10.4	13.2166	10.4
171	10.1833	13	10.4
172	10.4	13	10.4
173	10.1833	13	10.4
174	10.4	13	10.6166
175	10.1833	12.5666	10.1833
176	10.1833	12.5666	10.4
177	10.1833	12.35	10.4
178	10.1833	12.5666	10.1833
179	10.1833	12.5666	10.4
180	10.1833	12.35	10.1833
181	10.1833	12.35	10.6166
182	10.1833	12.5666	10.4
183	10.4	12.5666	10.6166
184	10.4	12.35	10.6166
185	10.1833	12.35	10.4
186	10.4	12.35	10.4
187	10.4	12.35	10.4
188	10.4	12.35	10.1833
189	10.4	12.5666	10.1833
190	10.4	12.5666	10.4
191	10.4	12.35	10.4
192	10.4	12.5666	9.96663
193	10.4	12.35	10.1833
194	10.1833	12.35	10.1833
195	10.4	12.5666	10.4
196	10.4	12.5666	10.6166
197	10.4	12.35	10.4
198	10.1833	12.5666	10.6166
199	10.4	12.5666	10.4
200	9.96663	12.35	10.4
201	10.4	12.5666	10.4
202	10.1833	12.5666	9.96663
203	10.4	12.5666	10.4
204	10.1833	12.35	10.6166
205	10.4	12.5666	10.4
206	10.1833	12.35	10.1833
207	10.4	12.5666	10.1833
208	10.4	12.35	10.4
209	10.1833	12.5666	10.1833
210	10.1833	12.5666	10.1833
211	10.4	12.5666	10.4
212	10.4	12.5666	10.4
213	10.4	12.5666	10.1833
214	10.6166	12.35	10.6166
215	10.4	12.1333	10.1833
216	10.4	12.35	10.1833
217	10.4	12.35	10.1833
218	10.6166	12.35	10.4
219	10.6166	12.5666	10.4
220	10.4	12.5666	10.4
221	10.4	12.35	10.4
222	10.4	12.5666	10.6166
223	10.4	12.35	10.1833
224	10.4	12.5666	10.6166
225	10.4	12.5666	9.96663
226	10.4	12.5666	10.4
227	10.4	12.5666	10.4
228	10.4	12.5666	10.1833
229	10.4	12.35	10.1833
230	10.4	12.5666	9.96663
231	10.4	12.35	10.6166
232	10.4	12.5666	10.6166
233	10.4	12.5666	10.4
234	10.4	12.5666	10.4
235	10.4	12.5666	10.4
236	10.1833	12.5666	10.4
237	10.4	12.5666	10.1833
238	10.4	12.5666	10.4
239	10.1833	12.5666	10.4
240	10.4	12.5666	10.4
241	10.1833	12.5666	10.1833
242	10.4	12.35	10.1833
243	10.4	12.5666	10.1833
244	10.4	12.5666	10.1833
245	10.4	12.5666	10.4
246	10.6166	12.5666	10.1833
247	10.1833	12.35	9.96663
248	10.4	12.5666	10.1833
249	10.1833	12.5666	10.4
250	10.1833	12.1333	10.4
251	10.4	12.1333	10.4
252	10.4	12.35	10.1833
253	10.4	12.35	9.96663
254	10.4	12.5666	10.4
255	10.4	12.35	10.4
256	10.4	12.1333	10.6166
257	10.1833	12.5666	10.1833
258	10.1833	12.5666	9.96663
259	10.4	12.35	10.1833
260	10.1833	12.5666	10.4
261	10.4	12.35	10.4
262	10.4	12.5666	10.6166
263	10.1833	12.5666	10.1833
264	10.1833	12.5666	10.6166
265	10.4	12.5666	9.96663
266	10.1833	12.5666	10.4
267	10.1833	12.35	10.1833
268	10.1833	12.35	10.4
269	10.1833	12.5666	10.6166
270	10.6166	12.1333	10.1833
271	10.1833	12.5666	10.4
272	10.1833	12.5666	10.4
273	10.6166	12.35	10.4
274	10.1833	12.35	10.4
275	10.1833	12.35	10.4
276	10.1833	12.5666	10.4
277	10.1833	12.35	10.1833
278	10.4	12.35	10.4
279	10.4	12.1333	10.4
280	10.4	12.5666	10.6166
281	10.4	12.35	10.6166
282	10.4	12.5666	10.6166
283	10.6166	12.5666	10.4
284	10.4	12.5666	10.4
285	10.4	12.35	10.6166
286	10.4	12.5666	10.4
287	10.4	12.5666	10.6166
288	10.4	12.5666	10.1833
289	10.4	12.5666	10.4
290	10.4	12.5666	9.96663
291	10.4	12.35	10.1833
292	10.4	12.5666	10.1833
293	10.6166	12.5666	10.1833
294	10.4	12.5666	10.4
295	10.6166	12.5666	10.1833
296	10.6166	12.5666	9.96663
297	10.6166	12.5666	10.4
298	10.4	12.5666	9.96663
299	10.4	12.35	10.1833
300	10.6166	12.7833	9.96663
301	10.6166	12.5666	10.4
302	10.6166	12.35	10.4
303	10.4	12.7833	10.4
304	10.4	13	10.4
305	10.6166	12.35	10.1833
306	10.4	12.5666	10.1833
307	10.4	12.5666	10.4
308	10.4	12.5666	10.6166
309	10.1833	12.7833	10.1833
310	10.4	12.5666	10.1833
311	10.4	12.5666	10.1833
312	10.6166	12.5666	10.1833
313	10.4	12.35	10.4
314	10.4	12.5666	10.4
315	10.6166	12.35	10.1833
316	10.6166	12.35	10.4
317	10.6166	12.7833	10.4
318	10.4	12.7833	10.4
319	10.4	12.5666	10.6166
320	10.4	12.5666	10.6166
321	10.8333	12.5666	10.4
322	10.6166	12.7833	10.4
323	10.8333	12.7833	10.4
324	10.6166	12.5666	10.1833
325	10.4	12.5666	10.6166
326	10.4	12.35	10.4
327	10.6166	12.7833	10.6166
328	10.4	12.5666	10.6166
329	10.6166	12.5666	10.4
330	10.6166	12.5666	10.6166
331	10.4	12.5666	10.4
332	10.4	12.7833	10.1833
333	10.4	12.5666	10.4
334	10.4	12.7833	10.6166
335	10.4	12.35	10.4
336	10.4	12.7833	9.96663
337	10.6166	12.5666	10.6166
338	10.6166	12.5666	10.1833
339	10.6166	12.7833	10.4
340	10.6166	12.7833	10.4
341	10.4	12.5666	10.8333
342	10.6166	13	10.4
343	10.4	12.7833	9.96663
344	10.4	12.7833	10.6166
345	10.4	12.7833	10.4
346	10.6166	12.7833	10.6166
347	10.6166	12.7833	9.96663
348	10.6166	12.7833	10.4
349	10.4	12.7833	10.1833
350	10.4	12.35	10.1833
351	10.4	12.7833	10.4
352	10.4	12.7833	10.1833
353	10.4	12.5666	10.1833
354	10.4	12.7833	10.1833
355	10.4	12.7833	10.4
356	10.1833	12.7833	10.4
357	10.4	12.5666	10.1833
358	10.4	12.7833	10.4
359	10.4	12.5666	10.4
360	10.4	13	10.4
361	10.1833	12.7833	10.1833
362	10.4	13	10.1833
363	10.4	12.5666	10.4
364	10.4	12.7833	9.96663
365	10.4	12.7833	10.1833
366	10.4	12.7833	10.1833
367	10.4	12.7833	9.96663
368	10.4	12.5666	10.1833
369	10.4	12.7833	9.96663
370	10.4	12.7833	10.1833
371	10.4	12.7833	10.4
372	10.1833	12.7833	9.96663
373	10.4	12.7833	10.4
374	10.4	12.5666	10.1833
375	10.1833	12.7833	10.1833
376	10.1833	12.7833	9.96663
377	10.1833	12.7833	10.1833
378	10.4	12.7833	10.1833
379	10.4	12.7833	10.6166
380	10.4	12.7833	10.4
381	10.4	12.7833	10.6166
382	10.4	12.7833	10.4
383	10.1833	12.7833	10.4
384	10.4	12.7833	10.4
385	10.4	13	10.4
386	10.4	12.7833	10.4
387	10.4	12.7833	10.1833
388	10.4	13	10.6166
389	10.4	12.7833	10.6166
390	10.4	12.7833	10.4
391	10.4	12.7833	10.4
392	10.4	12.7833	10.4
393	10.4	13	10.1833
394	10.4	12.7833	10.4
395	10.4	12.7833	10.6166
396	10.4	13	10.6166
397	10.4	12.7833	10.4
398	10.4	12.7833	10.1833
399	10.4	13	9.96663
400	10.4	12.7833	10.4
401	10.4	12.5666	10.6166
402	10.4	13	10.6166
403	10.4	12.7833	10.4
404	10.4	12.7833	10.6166
405	10.4	13	10.6166
406	10.6166	12.7833	10.6166
407	10.1833	12.7833	10.4
408	10.4	12.7833	10.6166
409	10.4	12.7833	10.6166
410	10.4	12.7833	10.4
411	10.4	13	10.4
412	10.4	12.5666	10.6166
413	10.4	13	10.6166
414	10.4	13	10.6166
415	10.1833	13	10.1833
416	10.4	12.7833	10.8333
417	10.1833	12.5666	10.4
418	10.4	12.7833	10.6166
419	10.4	12.7833	10.1833
420	10.1833	12.7833	10.4
421	9.96663	12.7833	10.4
422	10.1833	12.7833	10.6166
423	10.4	13	10.1833
424	10.1833	12.7833	10.4
425	10.4	12.7833	10.6166
426	10.4	12.7833	10.6166
427	10.4	12.7833	10.6166
428	10.4	12.7833	10.8333
429	10.1833	13	10.4
430	10.6166	12.7833	10.6166
431	10.4	13	10.6166
432	10.4	13	10.6166
433	10.1833	13	10.1833
434	10.4	13	10.6166
435	10.4	12.7833	10.6166
436	10.4	13	10.6166
437	10.1833	12.5666	10.8333
438	10.4	12.7833	10.6166
439	10.1833	13	10.6166
440	10.4	12.7833	10.6166
441	10.4	12.7833	10.6166
442	10.6166	13	10.4
443	10.4	13	10.6166
444	10.1833	13	10.8333
445	10.1833	13	10.4
446	10.4	13	10.6166
447	9.96663	13	10.4
448	9.96663	12.7833	10.4
449	10.1833	12.7833	10.8333
450	10.1833	12.7833	10.6166
451	10.4	13	10.4
452	10.1833	12.7833	10.1833
453	10.4	12.7833	10.6166
454	10.4	13	10.6166
455	10.4	12.5666	10.6166
456	10.4	12.5666	10.6166
457	10.4	12.5666	10.8333
458	10.4	13	10.6166
459	10.4	12.7833	10.6166
460	10.4	12.7833	10.6166
461	10.4	12.7833	10.4
462	10.4	13	10.8333
463	10.4	12.7833	10.6166
464	10.4	12.7833	10.8333
465	10.1833	12.5666	10.8333
466	10.1833	12.7833	10.6166
467	9.96663	12.7833	10.8333
468	10.1833	13	10.6166
469	10.1833	12.7833	10.6166
470	9.96663	12.7833	10.4
471	10.1833	12.7833	10.6166
472	10.1833	12.7833	10.6166
473	10.1833	12.7833	10.8333
474	10.1833	12.7833	10.6166
475	10.1833	13	10.6166
476	10.1833	13	10.1833
477	10.1833	13	10.6166
478	10.1833	12.7833	10.6166
479	10.1833	12.7833	10.4
480	10.1833	13	10.8333
481	10.1833	12.7833	10.8333
482	10.1833	12.7833	10.8333
483	10.4	12.7833	10.4
484	10.4	12.7833	10.6166
485	10.4	12.7833	10.8333
486	10.4	12.5666	10.6166
487	10.6166	12.5666	10.6166
488	10.4	12.7833	10.8333
489	10.4	12.7833	10.6166
490	10.4	12.5666	10.8333
491	10.4	12.5666	10.6166
492	10.4	12.7833	10.8333
493	10.4	12.7833	10.8333
494	10.4	12.7833	10.6166
495	10.1833	12.7833	10.6166
496	10.1833	12.5666	10.6166
497	10.1833	12.7833	10.6166
498	10.4	12.7833	10.8333
499	10.4	12.7833	10.6166
500	10.4	12.7833	10.8333
501	10.4	12.7833	10.6166
502	10.4	13	10.8333
503	10.1833	12.7833	10.8333
504	10.4	12.7833	10.6166
505	10.1833	12.7833	10.6166
506	10.4	13.2166	10.4
507	10.4	12.7833	10.6166
508	10.4	13	10.8333
509	10.4	13	10.8333
510	10.4	13	10.6166
511	10.1833	12.7833	10.6166
512	10.4	12.7833	10.8333
513	10.4	13	10.6166
514	10.1833	12.7833	10.6166
515	10.4	13	10.4
516	10.6166	13	10.8333
517	10.4	13	10.8333
518	10.4	12.7833	10.6166
519	10.4	13	10.6166
520	10.4	12.7833	10.6166
521	10.1833	13	10.6166
522	10.4	13	10.4
523	10.4	13	10.4
524	10.1833	13	10.8333
525	10.4	13	10.4
526	10.4	13	10.6166
527	10.4	13	10.6166
528	10.4	13	10.6166
529	10.4	12.7833	10.6166
530	10.4	12.7833	10.1833
531	10.4	12.7833	10.6166
532	10.4	12.7833	10.6166
533	10.6166	12.7833	10.4
534	10.6166	13	10.8333
535	10.6166	12.7833	10.4
536	10.6166	12.7833	10.4
537	10.6166	13	10.6166
538	10.4	13	10.4
539	10.6166	13	10.6166
540	10.6166	13	10.6166
541	10.6166	13	10.4
542	10.6166	12.7833	10.6166
543	10.4	12.7833	10.6166
544	10.4	13	10.1833
545	10.6166	12.7833	10.6166
546	10.4	12.7833	10.4
547	10.6166	13	10.4
548	10.6166	12.7833	10.1833
549	10.6166	13	10.4
550	10.4	12.7833	10.1833
551	10.6166	12.7833	10.4
552	10.6166	13	10.1833
553	10.6166	12.7833	10.4
554	10.4	12.7833	10.1833
555	10.4	12.7833	10.6166
556	10.1833	12.7833	10.6166
557	10.4	12.7833	10.8333
558	10.4	12.7833	10.8333
559	10.4	12.5666	10.6166
560	10.4	13	10.6166
561	10.6166	12.7833	10.6166
562	10.1833	13	10.4
563	10.1833	12.7833	10.4
564	10.6166	13	10.1833
565	10.1833	12.5666	10.4
566	10.1833	12.7833	10.6166
567	10.1833	13	10.4
568	10.4	12.5666	10.8333
569	10.4	12.5666	10.6166
570	10.4	12.5666	10.8333
571	10.4	12.5666	10.6166
572	10.4	12.5666	10.4
573	10.4	12.5666	10.4
574	10.1833	12.7833	10.6166
575	10.4	12.5666	10.4
576	10.4	12.7833	10.6166
577	10.4	12.7833	10.4
578	10.6166	12.7833	10.4
579	10.1833	12.5666	10.6166
580	10.6166	12.5666	10.4
581	10.4	12.5666	10.4
582	10.4	12.5666	10.4
583	10.4	12.5666	10.8333
584	10.4	12.35	10.8333
585	10.1833	12.5666	10.6166
586	10.6166	12.5666	10.4
587	10.6166	12.35	10.4
588	10.4	12.35	10.4
589	10.4	12.7833	10.4
590	10.6166	12.5666	10.1833
591	10.4	12.35	10.1833
592	10.4	12.35	10.4

## Sheet: 20Hz
Stimulation
Time (s)	BGBV-075_0000	BGBV-106_0000	BGBV-117_0000	BGBV-134_0000	BGBV-253_0000	BGBV-333_0000	BGBV-334_0000	BGBV-355_0000	BGBV-407_0000	BGBV-417_0000
0	12.35	18.8499	21.0166	24.3744	16.5746			26.9743	24.0494	19.4995
1	12.5666	18.8499	21.2333	24.0494	16.5746	24.0494	21.1245	26.6493	24.3744	19.4995
2	12.7833	18.6333	21.2333	24.0494	16.5746	23.0744	21.1245	26.9743	24.0494	19.4995
3	12.7833	19.0666	21.2333	24.0494	16.2496	23.0744	21.1245	27.2993	24.0494	19.4995
4	12.7833	19.0666	21.2333	24.0494	16.2496	23.3994	21.1245	27.2993	24.3744	19.4995
5	12.7833	18.8499	21.4499	24.0494	16.2496	23.3994	21.1245	26.6493	24.3744	19.4995
6	12.5666	18.6333	21.2333	24.0494	16.2496	22.7494	21.7745	26.6493	24.0494	19.4995
7	12.7833	18.8499	21.4499	24.0494	16.5746	23.0744	21.4495	26.6493	24.3744	19.4995
8	12.5666	18.8499	21.2333	24.0494	16.2496	22.7494	21.1245	26.9743	24.0494	19.4995
9	12.5666	18.8499	21.4499	24.0494	15.9246	23.0744	21.4495	26.6493	24.0494	19.1745
10	12.7833	18.6333	21.2333	24.0494	16.2496	23.0744	21.4495	27.2993	24.3744	19.1745
11	12.35	18.8499	21.2333	24.0494	16.2496	23.3994	21.1245	26.6493	24.0494	19.4995
12	12.5666	18.8499	21.2333	24.0494	16.2496	23.0744	21.1245	26.9743	24.3744	19.1745
13	12.5666	19.0666	21.4499	24.0494	16.2496	23.0744	20.7995	26.9743	24.0494	19.1745
14	12.5666	18.8499	21.2333	24.0494	15.9246	23.0744	21.4495	26.6493	24.0494	19.4995
15	12.5666	19.0666	21.2333	24.0494	16.2496	22.7494	21.7745	26.6493	24.0494	19.4995
16	12.7833	18.8499	21.2333	23.7244	16.5746	23.0744	21.7745	26.6493	24.3744	19.1745
17	12.35	18.8499	21.2333	24.0494	16.5746	22.7494	21.4495	26.6493	23.7244	19.4995
18	12.5666	18.6333	21.2333	24.0494	16.5746	22.7494	21.1245	27.2993	23.3994	19.4995
19	12.5666	18.6333	21.2333	24.0494	16.5746	23.3994	21.4495	26.6493	24.0494	19.8245
20	12.7833	19.0666	21.4499	24.0494	16.5746	22.7494	22.0994	26.6493	23.7244	19.1745
21	12.5666	18.6333	21.2333	24.0494	15.9246	23.0744	21.4495	26.9743	24.0494	19.4995
22	12.35	18.6333	21.2333	24.0494	16.2496	23.3994	21.4495	26.9743	24.0494	19.4995
23	12.7833	18.8499	21.4499	24.0494	16.2496	23.0744	21.4495	26.3243	24.3744	19.4995
24	12.5666	18.8499	21.2333	24.0494	16.2496	22.7494	21.7745	27.2993	23.7244	19.4995
25	12.5666	18.6333	21.4499	24.0494	16.2496	23.0744	21.4495	27.2993	24.3744	19.4995
26	12.35	18.6333	21.4499	24.0494	16.5746	23.0744	21.4495	26.6493	24.0494	19.4995
27	12.7833	18.6333	21.2333	24.3744	16.2496	23.0744	21.1245	27.2993	23.7244	19.4995
28	12.35	18.6333	21.2333	24.0494	16.2496	23.0744	21.4495	26.6493	23.7244	19.4995
29	12.35	18.8499	21.4499	24.0494	15.9246	23.0744	21.4495	26.9743	24.0494	19.4995
30	12.7833	18.8499	21.2333	24.0494	16.2496	22.7494	21.1245	26.9743	24.0494	19.4995
31					16.2496			26.9743	23.7244	19.4995
32					15.9246			26.9743	23.7244	19.4995
33					16.2496			27.2993	23.7244	19.1745
34					16.2496			26.9743	23.7244	19.4995
35					16.2496			26.9743	24.3744	19.4995
36					16.5746			27.2993	23.7244	19.4995
37					16.5746			27.2993	23.7244	19.4995
38					16.8996			27.2993	23.7244	19.4995
39					16.5746			27.2993	23.7244	19.4995
40					16.8996			27.2993	24.0494	19.4995
41	12.7833	18.6333	21.2333	24.0494	16.5746	23.3994	21.7745	26.9743	24.0494	19.4995
42	12.35	18.8499	21.4499	24.0494	16.5746	22.7494	20.4745	26.9743	23.3994	19.8245
43	12.5666	18.8499	21.2333	24.0494	16.5746	22.7494	21.1245	26.9743	24.0494	19.1745
44	12.1333	18.8499	21.2333	24.0494	16.8996	22.7494	21.7745	26.6493	23.7244	19.8245
45	12.35	18.6333	21.2333	24.0494	16.8996	23.0744	21.4495	27.2993	23.7244	19.8245
46	12.5666	18.8499	21.2333	24.0494	16.8996	22.7494	20.7995	27.2993	23.7244	19.4995
47	12.5666	18.8499	21.2333	24.0494	16.5746	23.3994	21.4495	26.9743	23.7244	19.8245
48	12.7833	18.6333	21.2333	24.0494	16.5746	23.0744	21.1245	27.2993	23.7244	19.4995
49	12.5666	18.6333	21.2333	24.0494	16.8996	22.7494	20.7995	26.9743	23.7244	19.4995
50	12.5666	18.6333	21.2333	24.0494	16.5746	23.0744	21.1245	26.9743	24.0494	19.8245
51	12.35	18.6333	21.2333	24.0494	16.5746	23.3994	21.1245	27.2993	24.0494	19.8245
52	12.5666	18.6333	21.2333	24.0494	16.8996	22.7494	21.4495	27.2993	23.7244	19.8245
53	12.5666	18.6333	21.2333	24.0494	16.2496	23.0744	21.1245	27.2993	24.0494	19.8245
54	12.35	18.8499	21.2333	24.0494	16.5746	23.0744	21.1245	27.2993	23.7244	19.4995
55	12.5666	18.8499	21.2333	24.0494	16.5746	23.3994	21.4495	27.2993	23.7244	19.8245
56	12.5666	18.8499	21.2333	24.0494	16.5746	23.0744	21.1245	26.9743	23.7244	19.8245
57	12.5666	18.8499	21.2333	24.0494	16.5746	23.0744	21.4495	27.2993	23.7244	20.1495
58	12.35	18.8499	21.2333	24.0494	16.2496	23.3994	21.4495	27.2993	23.7244	19.8245
59	12.1333	18.8499	21.0166	24.0494	15.9246	23.3994	21.4495	26.9743	23.7244	19.4995
60	12.5666	18.8499	21.2333	24.0494	16.2496	23.7244	21.4495	26.6493	24.0494	19.4995
61	12.35	18.6333	21.0166	24.3744	15.9246	23.3994	21.1245	27.2993	23.7244	19.8245
62	12.35	18.8499	21.0166	24.0494	16.2496	23.0744	21.1245	26.9743	23.7244	18.8495
63	12.35	18.6333	21.2333	23.7244	16.2496	23.3994	21.4495	26.6493	24.0494	20.1495
64	12.35	18.8499	20.7999	24.0494	16.2496	23.3994	21.4495	26.9743	23.7244	19.4995
65	12.35	18.8499	21.2333	23.7244	16.2496	23.3994	21.1245	26.6493	24.0494	19.4995
66	12.1333	18.8499	21.0166	23.7244	16.2496	23.3994	21.1245	26.6493	24.0494	19.4995
67	11.9166	18.8499	20.7999	23.7244	16.2496	23.0744	20.7995	26.3243	23.7244	19.4995
68	12.1333	18.6333	20.7999	23.7244	16.2496	23.0744	21.4495	26.6493	23.7244	19.4995
69	12.35	18.8499	20.5833	23.7244	16.2496	22.4244	21.4495	26.3243	23.7244	19.4995
70	11.9166	18.6333	20.7999	23.7244	16.2496	22.0994	21.1245	25.9994	23.7244	19.1745
71	12.1333	18.8499	20.7999	23.7244	15.9246	22.4244	21.4495	25.9994	23.7244	18.8495
72	12.35	18.6333	20.7999	23.7244	15.9246	23.0744	21.4495	26.3243	24.0494	19.1745
73	11.9166	19.0666	20.7999	23.7244	16.2496	23.0744	21.4495	25.9994	23.7244	19.4995
74	12.35	18.8499	20.7999	23.3994	15.9246	23.0744	21.4495	25.9994	23.7244	19.1745
75	11.7	18.8499	20.3666	23.7244	15.9246	23.3994	21.1245	25.9994	24.0494	18.8495
76	11.9166	18.8499	20.3666	23.0744	16.2496	23.7244	21.4495	25.9994	23.7244	19.1745
77	12.35	18.6333	20.3666	23.3994	16.5746	23.3994	21.1245	26.3243	23.7244	18.8495
78	11.9166	18.8499	20.3666	23.3994	16.2496	23.0744	21.1245	25.3494	24.0494	18.8495
79	11.9166	18.4166	20.5833	23.0744	15.9246	23.0744	21.1245	25.3494	24.0494	18.8495
80	11.7	18.6333	20.3666	23.0744	15.9246	23.0744	21.1245	25.3494	24.0494	18.5245
81	11.7	18.6333	20.3666	23.0744	16.2496	23.0744	21.1245	25.0244	23.7244	18.5245
82	12.1333	18.6333	19.9333	23.0744	16.2496	22.7494	21.4495	25.0244	24.0494	18.5245
83	11.9166	18.6333	20.1499	23.0744	16.2496	23.0744	21.1245	25.0244	24.0494	19.1745
84	11.7	18.6333	20.3666	23.0744	16.5746	22.7494	20.7995	25.3494	23.3994	18.8495
85	11.7	18.6333	20.1499	23.0744	16.2496	22.7494	21.4495	25.3494	23.7244	18.5245
86	11.7	18.6333	20.1499	23.0744	16.2496	22.7494	20.1495	24.6994	23.7244	18.8495
87	11.9166	18.6333	19.9333	23.0744	16.2496	22.7494	20.4745	24.6994	24.0494	18.8495
88	11.4833	18.4166	19.9333	23.0744	16.2496	22.7494	20.7995	25.0244	24.0494	18.1995
89	11.7	18.4166	20.1499	22.7494	16.2496	23.3994	21.1245	24.6994	23.7244	17.8746
90	11.9166	18.6333	19.7166	23.0744	16.2496	22.7494	20.4745	24.0494	24.0494	18.5245
91	11.4833	18.6333	19.7166	22.7494	16.8996	23.3994	20.7995	25.0244	23.7244	18.5245
92	11.9166	18.6333	20.1499	22.7494	16.8996	22.7494	21.1245	24.3744	23.7244	17.8746
93	11.4833	18.1999	19.9333	22.7494	16.8996	22.7494	21.1245	24.3744	23.3994	18.1995
94	11.7	18.4166	19.7166	22.7494	16.5746	23.0744	21.1245	24.6994	23.7244	18.1995
95	11.4833	18.6333	19.7166	22.7494	16.5746	23.0744	20.7995	24.3744	23.7244	18.1995
96	11.7	18.4166	19.4999	22.4244	16.5746	23.3994	20.4745	24.0494	23.7244	18.1995
97	11.2666	18.6333	19.9333	22.4244	16.5746	22.7494	21.1245	23.7244	23.7244	18.8495
98	11.7	18.1999	19.7166	22.4244	16.5746	23.0744	20.7995	24.0494	23.7244	18.1995
99	11.2666	18.4166	19.9333	22.4244	16.5746	23.0744	21.1245	24.3744	23.7244	18.1995
100	11.2666	18.4166	19.2833	22.4244	16.5746	22.7494	20.4745	23.3994	23.3994	18.1995
101	11.7	18.1999	19.4999	22.4244	16.5746	22.7494	20.7995	23.7244	23.3994	18.1995
102	11.2666	18.4166	19.7166	22.4244	16.2496	23.0744	20.1495	23.7244	23.3994	18.1995
103	11.2666	18.4166	19.2833	22.4244	16.5746	23.0744	20.7995	23.3994	23.3994	17.8746
104	11.9166	18.4166	19.2833	22.4244	16.5746	23.0744	20.7995	24.3744	23.3994	18.1995
105	11.4833	18.4166	19.4999	22.4244	16.2496	23.3994	20.7995	24.0494	23.3994	17.8746
106	11.7	18.4166	19.2833	22.4244	16.2496	23.0744	20.4745	23.7244	23.0744	17.8746
107	11.4833	18.1999	19.2833	22.4244	15.9246	23.0744	20.1495	23.7244	23.0744	17.8746
108	11.7	18.4166	19.4999	22.4244	16.2496	23.0744	20.4745	23.7244	23.7244	17.8746
109	11.4833	18.1999	19.0666	22.4244	15.9246	23.0744	20.7995	23.7244	22.7494	18.1995
110	11.4833	18.4166	19.2833	22.4244	15.9246	23.3994	20.1495	23.7244	23.3994	17.8746
111	11.4833	18.4166	19.0666	22.4244	16.5746	22.7494	20.1495	23.7244	23.0744	18.1995
112	11.7	18.4166	18.8499	22.4244	15.9246	22.4244	20.7995	23.3994	23.3994	18.1995
113	11.4833	18.4166	19.0666	22.4244	15.9246	22.4244	21.1245	23.0744	22.7494	17.8746
114	11.7	18.4166	19.2833	22.0994	16.2496	23.0744	20.1495	23.7244	23.0744	17.8746
115	11.7	18.4166	18.8499	22.4244	15.9246	23.0744	20.4745	23.3994	22.4244	18.1995
116	11.4833	18.1999	18.8499	22.0994	16.2496	23.0744	20.4745	23.0744	22.4244	17.5496
117	11.9166	18.4166	19.0666	22.0994	16.8996	23.0744	20.4745	23.0744	22.4244	17.8746
118	11.9166	18.4166	19.0666	22.0994	16.5746	23.3994	20.1495	22.7494	23.0744	18.1995
119	11.7	18.4166	18.8499	21.7745	16.5746	22.4244	20.1495	22.7494	22.4244	17.8746
120	11.7	18.4166	18.8499	22.0994	15.9246	23.0744	20.4745	22.7494	22.4244	18.1995
121	11.7	18.6333	18.6333	22.0994	16.2496	22.7494	19.8245	22.7494	22.0994	17.8746
122	11.9166	18.1999	18.8499	21.7745	16.5746	22.7494	20.1495	23.0744	22.4244	17.8746
123	11.7	18.1999	19.0666	21.7745	16.5746	23.3994	20.4745	23.3994	22.4244	17.8746
124	11.4833	18.1999	19.0666	22.0994	16.5746	23.3994	20.1495	23.0744	22.4244	17.8746
125	11.4833	18.1999	18.6333	21.7745	16.5746	22.7494	20.4745	23.0744	21.7745	17.8746
126	11.7	18.1999	18.6333	22.0994	16.5746	22.7494	20.1495	23.0744	22.0994	17.8746
127	11.2666	18.1999	18.6333	22.0994	16.5746	22.7494	20.1495	23.0744	22.4244	17.8746
128	11.9166	18.1999	18.6333	22.0994	15.9246	23.0744	20.1495	23.0744	22.0994	17.8746
129	11.4833	18.4166	18.8499	22.0994	16.5746	22.7494	20.1495	22.7494	22.7494	17.5496
130	11.7	18.4166	18.6333	22.4244	16.5746	23.0744	20.1495	22.7494	22.4244	17.8746
131	11.4833	17.7666	18.8499	22.4244	16.2496	23.3994	20.1495	22.7494	21.7745	17.8746
132	11.9166	17.7666	19.0666	21.7745	16.5746	22.7494	19.8245	22.7494	22.0994	17.8746
133	11.4833	17.3333	18.4166	21.7745	16.5746	22.7494	20.7995	23.3994	21.7745	17.8746
134	11.4833	17.5499	18.6333	21.4495	16.5746	23.3994	20.1495	22.7494	21.7745	17.8746
135	11.9166	17.5499	18.8499	21.4495	16.5746	22.7494	20.1495	23.0744	22.0994	17.8746
136	11.7	17.5499	18.6333	21.4495	16.8996	23.0744	20.1495	23.0744	21.4495	18.1995
137	11.4833	17.3333	19.0666	21.4495	15.9246	23.0744	19.8245	22.4244	21.7745	18.1995
138	11.9166	17.3333	18.6333	21.4495	16.2496	23.3994	20.1495	23.0744	22.4244	18.1995
139	11.7	17.5499	18.8499	21.4495	16.5746	22.7494	19.4995	23.0744	22.0994	17.8746
140	11.9166	17.3333	18.6333	21.4495	16.5746	22.7494	20.4745	23.0744	21.4495	17.8746
141	11.7	17.3333	18.4166	21.4495	16.8996	23.3994	19.8245	22.4244	21.7745	18.5245
142	11.2666	17.3333	18.6333	21.1245	16.5746	22.7494	19.4995	23.3994	21.7745	18.1995
143	11.7	17.5499	19.0666	21.4495	16.8996	22.7494	19.8245	23.0744	21.4495	18.1995
144	11.9166	17.3333	18.8499	21.4495	16.2496	22.7494	19.8245	23.0744	21.7745	18.5245
145	11.7	17.3333	18.8499	21.4495	16.2496	22.4244	20.4745	22.7494	22.0994	18.5245
146	11.7	17.3333	19.0666	21.1245	16.8996	22.0994	20.1495	22.4244	21.4495	18.5245
147	11.7	17.3333	18.8499	21.4495	16.5746	22.7494	19.1745	22.7494	21.7745	17.8746
148	11.4833	17.1166	18.8499	21.4495	16.5746	22.4244	19.4995	22.4244	21.4495	17.8746
149	11.9166	17.3333	18.6333	21.1245	16.8996	22.7494	19.8245	22.4244	21.4495	18.1995
150	11.9166	17.1166	18.8499	21.1245	16.8996	22.7494	19.8245	22.7494	22.0994	17.8746
151	11.7	17.3333	18.6333	21.1245	16.5746	22.4244	19.4995	22.7494	20.7995	18.1995
152	11.9166	17.3333	18.6333	21.1245	16.2496	23.0744	19.4995	22.7494	21.4495	17.8746
153	11.7	17.5499	18.8499	21.1245	16.2496	23.0744	19.4995	23.0744	21.4495	17.8746
154	11.9166	17.5499	18.6333	21.1245	16.8996	23.0744	19.4995	23.0744	20.7995	17.8746
155	11.4833	17.1166	18.8499	21.1245	16.5746	23.3994	20.1495	23.0744	20.7995	17.8746
156	12.1333	17.5499	18.6333	21.1245	16.5746	23.0744	19.4995	23.0744	20.4745	18.1995
157	11.9166	17.3333	18.4166	21.1245	16.2496	22.7494	18.8495	23.3994	20.7995	17.8746
158	12.35	17.5499	18.6333	21.1245	16.8996	22.7494	19.1745	23.0744	20.7995	17.5496
159	11.7	17.5499	18.4166	21.1245	16.2496	23.3994	19.4995	23.0744	20.7995	17.8746
160	11.9166	17.5499	18.6333	21.1245	16.8996	23.3994	19.4995	23.0744	21.1245	17.8746
161	11.4833	17.5499	18.6333	21.1245	16.2496	22.7494	19.8245	23.3994	21.1245	17.5496
162	11.7	17.7666	18.6333	21.1245	16.2496	23.3994	19.8245	23.0744	20.4745	17.8746
163	11.9166	17.7666	18.6333	21.1245	15.9246	23.0744	19.1745	23.0744	20.1495	17.5496
164	12.1333	17.5499	18.6333	21.1245	16.2496	23.0744	19.8245	23.3994	20.7995	18.1995
165	11.9166	17.7666	18.4166	21.1245	16.2496	23.3994	18.8495	23.0744	20.7995	17.5496
166	11.7	17.7666	18.1999	21.1245	15.5996	23.0744	19.8245	23.0744	20.7995	17.5496
167	11.9166	17.7666	18.1999	21.1245	15.9246	23.0744	18.8495	23.3994	20.1495	17.8746
168	12.1333	18.1999	18.4166	21.1245	15.9246	23.0744	19.4995	23.3994	20.4745	17.5496
169	11.7	17.7666	18.4166	21.1245	15.9246	23.3994	19.1745	23.3994	20.1495	17.8746
170	12.1333	17.9833	18.1999	21.1245	15.5996	22.7494	19.1745	23.0744	20.1495	18.1995
171	11.9166	17.7666	18.8499	21.1245	15.9246	22.4244	19.4995	23.3994	20.1495	17.8746
172	11.7	17.7666	18.1999	20.7995	15.5996	23.0744	19.1745	23.7244	20.4745	18.1995
173	11.4833	17.7666	19.0666	21.1245	15.9246	23.0744	19.4995	23.7244	20.4745	18.8495
174	11.7	17.7666	18.8499	21.1245	15.5996	22.7494	19.4995	23.7244	20.1495	18.5245
175	11.4833	17.7666	19.0666	21.1245	15.5996	23.3994	19.1745	23.3994	20.1495	18.1995
176	11.4833	17.7666	18.6333	20.7995	15.5996	23.0744	18.8495	24.0494	19.8245	17.8746
177	12.1333	17.7666	18.6333	21.1245	15.2746	22.4244	19.1745	23.7244	20.7995	18.1995
178	11.7	17.7666	18.8499	21.1245	15.5996	23.0744	19.4995	23.7244	20.7995	17.8746
179	11.7	17.5499	18.4166	21.1245	15.5996	22.7494	20.1495	23.3994	20.4745	18.1995
180	11.7	17.5499	18.4166	21.1245	15.5996	23.0744	18.5245	23.7244	20.4745	17.8746
181	11.7	17.5499	18.6333	21.1245	14.9496	22.7494	18.8495	23.7244	21.1245	18.1995
182	11.9166	17.5499	18.8499	21.1245	15.2746	22.4244	19.1745	23.7244	21.1245	18.5245
183	11.9166	17.5499	18.8499	21.1245	15.9246	22.7494	19.4995	24.0494	21.1245	18.1995
184	11.7	17.5499	18.4166	21.1245	15.9246	22.4244	19.1745	23.7244	20.1495	18.1995
185	11.9166	17.3333	18.6333	21.1245	15.5996	22.7494	18.8495	24.0494	21.4495	18.5245
186	11.9166	17.5499	18.6333	21.1245	15.9246	22.4244	18.8495	24.0494	20.7995	18.5245
187	11.7	17.3333	18.8499	21.1245	15.5996	22.4244	18.8495	23.7244	20.4745	18.1995
188	11.7	17.5499	18.6333	21.1245	15.2746	23.3994	19.8245	23.7244	21.1245	17.8746
189	11.7	17.7666	18.8499	21.1245	15.5996	22.7494	19.1745	23.7244	21.4495	17.8746
190	11.7	17.5499	18.6333	21.1245	15.9246	23.0744	19.4995	24.0494	20.4745	18.1995
191	11.7	17.5499	18.6333	21.1245	15.5996	22.7494	19.1745	24.0494	20.7995	17.8746
192	11.7	17.7666	18.6333	21.1245	15.9246	22.7494	18.8495	24.0494	20.4745	17.8746
193	11.7	17.7666	18.8499	21.1245	15.5996	22.7494	19.1745	23.7244	20.7995	18.5245
194	11.4833	17.5499	18.6333	21.4495	15.5996	22.7494	19.4995	24.3744	21.1245	17.8746
195	12.1333	17.5499	18.8499	21.4495	15.5996	22.7494	19.4995	24.0494	20.7995	18.5245
196	11.7	17.7666	18.8499	21.1245	15.5996	23.0744	18.8495	24.3744	21.1245	18.1995
197	11.7	17.7666	18.6333	21.1245	15.9246	22.7494	18.8495	24.3744	20.4745	18.8495
198	11.7	17.7666	18.8499	21.1245	14.2996	23.0744	18.8495	24.3744	20.4745	18.8495
199	11.9166	17.9833	18.6333	21.1245	15.2746	22.7494	19.1745	24.0494	20.7995	18.5245
200	11.7	17.9833	18.6333	21.4495	15.9246	23.3994	19.1745	24.0494	21.1245	18.8495
201	11.7	17.7666	18.4166	21.4495	15.5996	23.0744	19.4995	24.3744	20.7995	18.8495
202	11.7	17.9833	18.8499	21.4495	15.5996	23.0744	18.8495	23.7244	20.7995	18.8495
203	11.9166	17.7666	18.6333	21.4495	15.9246	22.7494	18.8495	24.3744	20.7995	18.8495
204	11.7	17.5499	18.6333	21.4495	15.9246	23.0744	18.8495	24.0494	20.7995	18.5245
205	11.4833	17.5499	19.0666	21.4495	15.2746	22.7494	19.1745	24.0494	20.4745	18.5245
206	11.7	17.5499	18.8499	21.4495	15.9246	23.3994	19.1745	24.3744	20.7995	18.8495
207	11.9166	17.5499	18.8499	21.4495	15.5996	23.0744	18.8495	24.0494	21.4495	18.5245
208	11.9166	17.5499	18.4166	21.7745	14.9496	22.7494	19.1745	24.3744	20.1495	18.5245
209	12.1333	17.7666	18.8499	21.4495	15.2746	22.4244	18.8495	24.3744	20.4745	18.8495
210	11.7	17.5499	18.8499	21.4495	14.9496	23.0744	18.8495	24.3744	20.4745	18.5245
211	12.1333	17.5499	18.8499	21.4495	15.2746	22.7494	18.8495	24.0494	20.4745	19.1745
212	11.9166	17.7666	19.0666	21.4495	15.2746	22.7494	19.1745	24.3744	20.4745	19.1745
213	11.7	17.5499	19.0666	21.4495	15.2746	23.0744	18.8495	24.3744	20.1495	18.8495
214	11.9166	17.5499	18.8499	21.7745	15.2746	23.0744	19.1745	24.3744	20.1495	19.1745
215	11.9166	17.5499	18.8499	21.7745	15.2746	22.7494	18.8495	24.6994	21.1245	19.1745
216	11.7	17.5499	18.8499	21.4495	15.5996	22.4244	19.1745	24.3744	20.7995	18.8495
217	11.7	17.3333	18.8499	21.4495	15.2746	22.4244	18.8495	24.0494	20.7995	18.5245
218	11.9166	17.3333	18.8499	21.7745	15.2746	22.7494	18.8495	24.6994	21.4495	18.5245
219	11.9166	17.5499	18.8499	21.4495	14.9496	23.0744	18.5245	24.3744	21.1245	19.1745
220	11.7	17.5499	18.8499	21.7745	15.2746	22.7494	19.1745	24.3744	20.4745	19.1745
221	11.9166	17.3333	18.8499	21.7745	15.5996	23.3994	18.8495	24.6994	19.8245	19.1745
222	11.9166	17.3333	19.0666	21.7745	15.9246	22.7494	18.8495	24.6994	20.1495	19.1745
223	11.7	17.3333	18.8499	21.7745	15.5996	22.7494	18.8495	24.3744	20.4745	18.8495
224	11.9166	17.3333	19.0666	21.4495	15.5996	23.0744	18.8495	24.6994	19.8245	18.8495
225	11.9166	17.5499	19.0666	21.4495	15.5996	22.7494	18.5245	24.6994	20.1495	18.8495
226	11.9166	17.3333	19.0666	21.4495	15.5996	22.7494	18.1995	24.3744	20.7995	19.1745
227	11.9166	17.5499	18.8499	21.7745	15.9246	23.0744	17.8746	24.6994	20.4745	18.5245
228	11.9166	17.1166	18.8499	21.7745	15.5996	22.4244	18.1995	24.3744	19.8245	18.8495
229	11.9166	17.3333	19.0666	21.7745	15.5996	23.0744	18.5245	24.6994	20.4745	18.8495
230	11.9166	17.3333	18.8499	21.7745	15.5996	23.0744	18.5245	24.6994	20.4745	19.1745
231	11.9166	17.3333	18.8499	21.7745	15.9246	23.0744	17.8746	24.6994	19.8245	18.5245
232	11.4833	17.5499	19.0666	21.4495	15.2746	22.0994	18.5245	24.3744	20.4745	19.1745
233	11.9166	17.5499	18.8499	21.7745	15.9246	22.0994	18.8495	24.6994	20.1495	18.8495
234	11.9166	17.3333	18.8499	21.4495	15.5996	23.0744	18.5245	25.0244	20.1495	19.1745
235	11.7	17.3333	19.0666	21.7745	15.9246	22.4244	17.8746	25.0244	20.7995	18.8495
236	11.7	17.3333	19.0666	21.4495	15.5996	22.4244	18.5245	24.0494	20.7995	18.5245
237	11.9166	17.3333	18.8499	21.4495	15.5996	22.4244	18.1995	25.0244	20.7995	18.5245
238	11.7	17.5499	19.2833	22.0994	15.5996	23.0744	18.8495	24.6994	20.1495	18.1995
239	11.7	17.5499	19.2833	21.7745	15.9246	22.4244	18.5245	24.6994	20.1495	18.5245
240	11.7	17.5499	19.2833	21.4495	15.9246	23.0744	18.1995	25.0244	20.4745	18.8495
241	11.7	17.5499	19.2833	21.4495	16.2496	22.7494	18.1995	25.0244	21.4495	18.5245
242	11.9166	17.3333	19.4999	21.7745	16.2496	22.7494	18.5245	25.3494	20.1495	18.8495
243	11.9166	17.3333	19.2833	21.7745	15.9246	22.7494	18.5245	24.6994	20.4745	18.5245
244	11.7	17.5499	19.2833	21.7745	15.9246	22.4244	18.1995	25.0244	20.4745	18.5245
245	11.7	17.5499	19.0666	21.7745	16.2496	23.3994	18.1995	25.0244	20.7995	18.8495
246	11.7	17.5499	19.0666	21.4495	15.9246	22.7494	18.1995	24.6994	20.7995	18.5245
247	11.4833	17.3333	19.2833	21.7745	16.2496	22.7494	18.5245	25.0244	20.1495	18.5245
248	11.7	17.1166	19.2833	21.4495	15.9246	22.7494	18.1995	25.0244	20.4745	18.5245
249	11.7	17.3333	19.2833	21.7745	15.9246	22.7494	18.5245	24.6994	21.1245	18.8495
250	11.7	17.3333	19.4999	21.4495	15.9246	22.4244	18.5245	25.3494	20.7995	18.5245
251	11.7	17.3333	19.2833	21.4495	15.9246	22.4244	18.1995	24.6994	20.4745	18.5245
252	11.4833	17.3333	19.0666	22.0994	15.9246	23.0744	18.5245	25.0244	20.7995	18.5245
253	11.7	17.3333	19.2833	21.7745	15.9246	23.0744	18.1995	25.6744	19.8245	18.5245
254	11.9166	17.5499	19.0666	21.7745	15.9246	22.7494	18.5245	25.3494	20.4745	19.1745
255	11.7	17.3333	19.2833	21.7745	15.9246	23.0744	18.5245	25.0244	20.1495	18.8495
256	11.4833	17.3333	19.2833	21.4495	15.9246	22.7494	18.8495	25.0244	20.7995	19.1745
257	11.7	17.3333	19.4999	21.7745	15.9246	22.7494	18.1995	24.6994	20.7995	18.1995
258	11.4833	17.5499	19.4999	21.7745	15.5996	22.0994	18.5245	25.0244	21.1245	18.5245
259	11.7	17.3333	19.4999	22.0994	15.9246	22.4244	18.5245	25.3494	21.1245	19.1745
260	11.4833	17.3333	19.2833	21.4495	15.9246	22.7494	18.1995	25.0244	21.1245	18.5245
261	11.7	17.5499	19.4999	22.0994	15.9246	22.0994	18.1995	25.0244	20.4745	18.8495
262	11.7	17.3333	19.4999	21.7745	16.2496	22.0994	18.8495	25.3494	21.1245	19.1745
263	11.7	17.5499	19.4999	22.0994	15.9246	22.7494	18.5245	25.0244	20.4745	18.8495
264	11.4833	17.5499	19.2833	21.7745	15.5996	23.0744	18.5245	25.0244	20.4745	18.5245
265	11.7	17.3333	19.4999	22.0994	15.9246	23.0744	18.1995	25.0244	20.7995	18.8495
266	11.2666	17.3333	19.4999	21.7745	15.9246	22.7494	18.5245	25.3494	20.7995	18.5245
267	11.7	17.3333	19.4999	22.0994	15.9246	22.4244	17.8746	24.6994	20.4745	18.8495
268	11.7	17.3333	19.4999	22.0994	15.9246	22.4244	18.5245	25.3494	20.4745	18.5245
269	11.2666	17.3333	19.4999	22.0994	15.9246	22.7494	18.1995	25.3494	20.4745	18.5245
270	11.4833	17.1166	19.2833	22.0994	15.9246	22.7494	18.5245	25.0244	20.1495	18.8495
271	11.4833	17.5499	19.2833	21.7745	16.2496	22.4244	17.5496	25.0244	20.4745	18.8495
272	11.4833	17.3333	19.4999	22.0994	15.5996	22.7494	18.5245	24.6994	20.7995	18.8495
273	11.9166	17.3333	19.2833	22.0994	15.9246	22.4244	18.5245	25.3494	20.4745	18.5245
274	11.4833	17.1166	19.4999	22.0994	15.9246	23.0744	18.1995	25.3494	20.4745	18.8495
275	11.7	17.3333	19.2833	22.0994	15.9246	22.7494	18.1995	25.0244	20.1495	18.5245
276	11.9166	17.3333	19.2833	22.0994	15.9246	22.7494	18.5245	25.3494	19.8245	18.5245
277	11.7	17.3333	19.2833	21.7745	15.9246	22.7494	18.5245	25.3494	20.1495	18.8495
278	11.7	17.1166	19.4999	21.7745	16.2496	23.0744	18.1995	25.0244	20.1495	18.8495
279	11.4833	17.3333	19.4999	21.4495	15.9246	22.4244	18.8495	24.6994	19.8245	18.5245
280	11.4833	17.1166	19.4999	21.7745	15.9246	23.0744	18.5245	25.3494	20.1495	18.8495
281	11.9166	17.1166	19.4999	21.7745	16.2496	22.4244	18.8495	25.3494	20.1495	18.8495
282	11.4833	17.3333	19.2833	22.0994	15.9246	22.0994	18.1995	25.3494	19.8245	18.5245
283	11.2666	17.1166	19.4999	22.0994	15.9246	22.4244	18.5245	25.3494	20.1495	18.8495
284	11.2666	17.3333	19.4999	22.0994	15.2746	22.7494	18.8495	25.6744	20.1495	18.8495
285	11.4833	17.1166	19.2833	21.7745	15.9246	22.7494	18.5245	25.6744	19.1745	18.5245
286	11.4833	17.1166	19.2833	22.0994	15.5996	22.7494	18.1995	25.3494	19.4995	18.5245
287	11.9166	17.3333	19.2833	22.0994	15.2746	22.7494	18.5245	25.6744	19.4995	18.8495
288	11.4833	17.1166	19.2833	21.7745	16.2496	22.4244	18.5245	25.0244	20.1495	18.8495
289	11.7	17.3333	19.2833	22.0994	15.5996	22.7494	18.5245	24.6994	19.4995	18.8495
290	11.7	17.3333	19.2833	21.7745	15.5996	22.4244	18.5245	25.3494	20.7995	18.8495
291	11.4833	17.1166	19.4999	22.0994	15.9246	22.4244	18.5245	25.9994	20.1495	18.8495
292	11.4833	17.1166	19.2833	21.7745	15.9246	22.4244	18.5245	25.3494	20.1495	18.5245
293	11.9166	17.1166	19.2833	22.0994	15.9246	22.7494	18.5245	25.3494	19.8245	18.8495
294	11.4833	17.3333	19.2833	21.7745	16.2496	22.7494	18.1995	25.0244	20.4745	18.5245
295	11.7	17.1166	19.2833	22.0994	15.5996	22.4244	18.1995	25.3494	20.7995	18.5245
296	11.2666	17.1166	19.2833	21.7745	15.9246	22.7494	18.5245	25.6744	20.4745	18.1995
297	11.9166	17.1166	19.4999	21.7745	15.9246	22.7494	18.5245	25.3494	20.4745	18.1995
298	11.7	17.1166	19.2833	21.7745	15.9246	23.0744	18.5245	25.3494	20.7995	18.5245
299	11.2666	17.1166	19.2833	22.0994	15.5996	22.7494	18.5245	25.0244	20.4745	18.1995
300	11.05	17.1166	19.2833	22.0994	15.5996	22.4244	18.1995	25.6744	21.1245	18.5245
301	11.7	17.1166	19.4999	21.7745	15.9246	23.0744	17.8746	25.0244	20.4745	18.5245
302	11.4833	17.3333	19.2833	22.0994	15.5996	23.0744	18.5245	25.3494	20.7995	18.5245
303	11.4833	17.1166	19.4999	22.0994	15.5996	23.0744	18.5245	25.6744	20.7995	18.8495
304	11.4833	17.1166	19.7166	22.0994	15.9246	23.3994	18.5245	25.6744	20.7995	18.8495
305	11.2666	17.3333	19.7166	22.0994	15.9246	23.0744	18.1995	25.6744	21.1245	18.8495
306	11.7	17.1166	19.4999	21.7745	15.5996	23.3994	18.5245	25.3494	20.7995	18.8495
307	11.4833	17.1166	19.2833	22.0994	15.5996	22.7494	18.1995	25.6744	20.7995	18.8495
308	11.4833	17.1166	19.4999	22.0994	15.9246	23.3994	18.8495	25.3494	20.7995	18.8495
309	11.4833	17.5499	19.4999	21.7745	15.9246	23.3994	18.5245	25.0244	20.7995	18.8495
310	11.4833	17.1166	19.2833	22.0994	15.9246	23.0744	18.1995	25.6744	20.1495	18.8495
311	11.2666	17.1166	19.2833	21.7745	16.2496	23.3994	18.5245	25.9994	20.7995	18.8495
312	11.4833	17.1166	19.4999	22.0994	15.9246	23.0744	18.5245	25.3494	20.7995	18.5245
313	11.2666	17.3333	19.4999	22.0994	15.5996	22.7494	18.5245	25.6744	20.7995	18.5245
314	11.4833	17.1166	19.2833	22.0994	15.9246	22.7494	18.8495	25.6744	21.4495	18.8495
315	11.7	17.1166	19.4999	21.7745	15.5996	22.7494	18.5245	25.6744	20.7995	18.5245
316	11.7	17.1166	19.2833	22.0994	16.2496	22.4244	18.1995	25.9994	20.4745	18.8495
317	11.7	17.1166	19.4999	22.0994	15.9246	22.4244	18.5245	25.6744	21.1245	18.5245
318	11.4833	17.3333	19.4999	22.0994	15.5996	22.4244	18.5245	25.6744	20.7995	18.5245
319	11.4833	17.1166	19.4999	21.7745	16.2496	22.7494	18.5245	25.3494	20.4745	18.8495
320	11.9166	17.3333	19.4999	21.7745	15.9246	22.4244	18.5245	25.3494	20.4745	18.5245
321	11.7	17.1166	19.7166	22.0994	16.2496	22.4244	18.8495	25.9994	20.1495	19.1745
322	11.9166	17.1166	19.7166	21.7745	16.2496	22.0994	18.5245	25.9994	20.1495	18.5245
323	11.7	17.1166	19.4999	22.0994	16.2496	22.4244	18.1995	25.6744	20.7995	19.1745
324	11.7	17.1166	19.4999	22.0994	15.9246	22.0994	18.5245	25.6744	20.7995	19.1745
325	11.4833	17.1166	19.7166	22.0994	15.9246	22.4244	18.8495	25.6744	20.7995	18.5245
326	11.7	17.1166	19.7166	22.0994	16.2496	22.0994	18.8495	25.6744	20.1495	19.1745
327	11.4833	17.1166	19.7166	22.0994	15.9246	22.0994	18.5245	25.3494	19.8245	19.1745
328	11.4833	17.1166	19.4999	22.0994	15.9246	22.7494	18.5245	25.6744	20.1495	18.8495
329	11.4833	17.3333	19.7166	22.0994	15.9246	22.4244	18.5245	25.6744	20.1495	19.1745
330	11.7	17.1166	19.4999	22.0994	15.9246	22.7494	18.1995	25.9994	19.8245	19.1745
331	11.7	17.1166	19.7166	22.0994	15.5996	22.4244	18.5245	25.9994	19.8245	18.8495
332	11.7	17.1166	19.7166	22.0994	15.5996	22.0994	18.5245	25.6744	19.4995	18.8495
333	11.4833	17.1166	19.7166	22.0994	16.2496	22.7494	18.8495	25.9994	19.8245	18.8495
334	11.4833	17.1166	19.7166	22.0994	15.5996	22.4244	17.8746	25.6744	19.8245	19.1745
335	11.7	17.1166	19.7166	22.0994	16.2496	22.0994	18.1995	25.3494	20.4745	18.8495
336	11.7	17.1166	19.7166	22.0994	15.9246	22.7494	18.1995	25.9994	20.1495	18.8495
337	11.4833	17.1166	19.7166	22.0994	15.5996	22.4244	18.5245	25.6744	19.8245	18.8495
338	11.7	17.1166	19.7166	22.0994	16.2496	22.7494	18.1995	25.6744	19.8245	18.8495
339	11.7	17.3333	19.7166	22.0994	15.2746	22.7494	18.1995	25.6744	20.1495	18.8495
340	11.7	17.1166	19.7166	22.0994	15.5996	22.7494	18.5245	25.6744	19.4995	18.5245
341	11.4833	17.1166	19.4999	22.0994	16.2496	22.4244	18.5245	25.3494	19.4995	19.1745
342	11.4833	17.1166	19.9333	22.0994	15.9246	22.7494	18.5245	25.9994	19.8245	18.8495
343	11.4833	17.1166	19.7166	22.0994	16.2496	22.4244	18.5245	25.9994	19.4995	19.1745
344	11.4833	17.3333	19.7166	22.0994	15.5996	22.4244	18.5245	25.6744	20.1495	18.8495
345	11.4833	17.1166	19.7166	22.0994	15.5996	23.0744	18.1995	25.6744	20.4745	18.8495
346	11.4833	16.8999	19.7166	22.0994	15.9246	22.7494	18.5245	25.6744	20.1495	18.8495
347	11.4833	17.1166	19.7166	22.0994	16.2496	22.7494	18.8495	25.9994	20.1495	18.8495
348	11.2666	17.5499	19.9333	22.0994	16.2496	22.7494	18.5245	26.3243	19.8245	19.1745
349	11.2666	17.1166	20.1499	22.0994	15.9246	22.7494	18.5245	25.9994	19.4995	19.1745
350	11.7	17.1166	19.7166	21.7745	15.9246	22.4244	18.5245	25.9994	19.8245	19.1745
351	11.4833	17.1166	19.9333	22.0994	15.9246	22.7494	18.5245	26.3243	19.4995	18.8495
352	11.7	16.8999	19.9333	22.0994	15.5996	22.4244	18.8495	25.9994	19.1745	19.1745
353	11.2666	16.8999	19.9333	22.0994	15.5996	22.4244	18.5245	25.9994	19.4995	19.1745
354	11.4833	16.8999	19.9333	22.0994	15.9246	22.7494	18.5245	25.6744	19.4995	18.8495
355	11.4833	16.8999	19.4999	22.0994	15.5996	22.0994	18.8495	25.6744	19.8245	18.8495
356	11.9166	17.1166	19.7166	22.0994	15.5996	22.7494	18.1995	25.6744	19.4995	18.8495
357	11.4833	17.1166	19.9333	22.0994	15.2746	22.7494	18.5245	25.6744	19.8245	18.8495
358	11.2666	17.3333	19.9333	22.0994	15.9246	22.7494	18.5245	25.9994	19.8245	18.8495
359	11.4833	17.1166	19.9333	22.0994	15.5996	22.7494	18.5245	25.6744	19.8245	19.1745
360	11.2666	17.1166	19.7166	22.0994	15.5996	23.0744	18.5245	25.9994	19.8245	19.1745
361	11.7	16.8999	19.9333	22.0994	15.5996	22.4244	18.5245	26.3243	19.4995	19.1745
362	11.2666	17.1166	19.7166	22.0994	15.9246	23.0744	18.8495	25.3494	19.8245	19.4995
363	11.4833	17.1166	19.7166	21.7745	15.9246	23.0744	18.5245	25.6744	19.4995	19.4995
364	11.4833	17.1166	19.9333	22.0994	15.5996	22.7494	18.5245	25.6744	19.4995	19.4995
365	11.4833	17.1166	19.7166	22.0994	15.9246	22.4244	18.5245	25.9994	18.8495	19.1745
366	11.4833	16.8999	19.7166	22.0994	15.9246	22.7494	18.8495	25.6744	19.4995	19.1745
367	11.4833	17.1166	19.7166	22.0994	15.9246	22.4244	18.1995	25.3494	19.4995	19.4995
368	11.2666	17.1166	20.3666	22.0994	15.9246	22.4244	18.8495	25.9994	18.8495	19.1745
369	11.4833	17.1166	20.1499	22.0994	15.5996	22.7494	18.8495	25.6744	19.1745	19.4995
370	11.4833	17.1166	20.1499	22.0994	15.2746	22.7494	18.8495	25.9994	19.4995	19.1745
371	11.2666	16.8999	20.3666	22.4244	15.5996	22.7494	19.1745	26.3243	19.4995	19.1745
372	11.4833	17.1166	20.1499	22.4244	15.5996	22.0994	18.8495	25.9994	19.4995	19.4995
373	11.2666	17.1166	20.3666	22.0994	15.9246	22.4244	18.5245	26.3243	19.4995	19.4995
374	11.2666	17.1166	20.3666	22.0994	15.5996	22.0994	18.8495	26.3243	19.4995	19.4995
375	11.05	16.6833	20.3666	22.4244	16.2496	22.4244	19.1745	26.3243	19.1745	19.4995
376	11.4833	17.1166	20.1499	22.0994	15.5996	22.4244	18.8495	25.9994	18.8495	19.4995
377	11.2666	17.1166	20.3666	22.0994	15.2746	22.4244	18.5245	26.3243	19.1745	19.1745
378	11.2666	17.1166	20.5833	21.7745	15.9246	22.4244	18.8495	25.6744	19.4995	19.1745
379	11.2666	16.8999	20.3666	22.0994	15.9246	22.7494	18.5245	26.3243	19.1745	19.1745
380	11.2666	17.3333	20.1499	22.0994	15.5996	22.4244	18.8495	26.3243	19.1745	18.8495
381	11.2666	16.8999	20.3666	22.0994	15.5996	22.4244	18.5245	25.9994	19.1745	18.8495
382	11.4833	17.1166	20.3666	22.0994	15.5996	22.4244	18.8495	26.3243	19.4995	19.1745
383	11.2666	17.1166	20.3666	22.0994	15.9246	22.4244	18.5245	26.6493	18.8495	19.1745
384	11.2666	16.8999	20.3666	22.0994	15.5996	22.0994	18.8495	26.3243	19.1745	19.1745
385	11.2666	16.8999	20.3666	22.4244	15.5996	22.4244	18.8495	25.6744	18.8495	19.1745
386	11.4833	17.1166	20.1499	22.4244	14.9496	22.4244	18.5245	25.6744	19.8245	19.1745
387	11.2666	17.1166	20.3666	22.0994	16.2496	22.4244	18.5245	25.9994	19.1745	19.1745
388	11.2666	17.3333	20.3666	22.0994	16.2496	22.0994	18.8495	25.6744	19.4995	18.8495
389	11.4833	17.5499	20.1499	22.4244	16.2496	22.4244	18.1995	25.9994	19.1745	19.1745
390	11.2666	16.8999	20.1499	21.7745	15.5996	22.4244	18.8495	26.3243	19.8245	19.4995
391	11.2666	17.3333	20.3666	22.4244	16.2496	22.4244	18.8495	26.3243	19.4995	19.4995
392	11.7	17.1166	20.3666	22.0994	16.2496	22.4244	18.8495	26.3243	19.1745	19.4995
393	11.2666	17.1166	20.5833	22.4244	16.5746	22.4244	18.8495	25.9994	19.1745	19.4995
394	11.2666	17.3333	20.3666	22.4244	16.8996	22.4244	19.1745	26.3243	19.8245	19.4995
395	11.2666	17.1166	20.1499	22.4244	16.2496	22.4244	18.5245	26.3243	19.1745	19.4995
396	11.4833	17.1166	20.3666	22.0994	16.2496	22.4244	19.1745	26.6493	19.4995	19.4995
397	11.4833	16.8999	20.1499	22.0994	16.5746	22.4244	18.8495	25.9994	20.1495	19.4995
398	11.4833	16.8999	20.3666	22.4244	16.5746	22.4244	19.1745	25.9994	19.4995	19.4995
399	11.4833	16.8999	20.3666	22.4244	16.2496	22.4244	19.1745	25.6744	19.4995	19.1745
400	11.05	16.8999	20.5833	22.0994	16.5746	22.0994	19.1745	25.3494	19.4995	19.4995
401	11.2666	16.8999	20.5833	22.4244	16.5746	22.0994	18.8495	25.9994	19.1745	19.4995
402	11.4833	17.1166	20.3666	22.0994	16.5746	22.4244	18.8495	26.3243	19.1745	18.8495
403	11.2666	17.1166	20.5833	22.0994	16.5746	22.0994	18.8495	25.6744	18.8495	18.8495
404	11.4833	17.1166	20.3666	22.0994	16.2496	22.4244	18.1995	26.3243	19.1745	18.8495
405	11.05	17.1166	20.3666	22.0994	16.2496	22.4244	18.5245	26.3243	19.4995	18.8495
406	11.4833	16.8999	20.3666	22.0994	16.2496	22.4244	18.8495	26.3243	19.1745	18.8495
407	11.4833	17.1166	20.3666	22.4244	15.9246	22.0994	18.5245	25.9994	19.1745	19.1745
408	11.05	17.1166	20.3666	22.0994	15.2746	22.0994	19.1745	25.9994	19.1745	19.1745
409	11.2666	17.1166	20.3666	22.0994	15.5996	22.0994	19.1745	26.9743	19.8245	19.1745
410	11.4833	17.1166	20.5833	22.0994	16.2496	22.0994	18.5245	25.9994	19.8245	19.1745
411	11.4833	16.8999	20.3666	22.0994	15.9246	22.4244	18.8495	26.3243	19.1745	19.1745
412	11.2666	16.8999	20.3666	22.0994	15.9246	22.0994	18.8495	25.6744	19.4995	19.1745
413	11.2666	17.1166	20.3666	22.0994	15.9246	22.0994	18.5245	25.6744	19.4995	19.4995
414	11.2666	17.1166	20.5833	22.0994	16.2496	22.0994	19.1745	25.9994	19.1745	19.4995
415	11.2666	16.8999	20.5833	22.4244	16.2496	22.4244	18.8495	26.3243	19.1745	19.4995
416	11.4833	17.3333	20.5833	22.4244	15.9246	22.0994	18.8495	26.3243	19.4995	19.4995
417	11.7	17.1166	20.3666	22.4244	16.8996	22.4244	18.8495	25.9994	19.4995	19.1745
418	11.2666	16.8999	20.5833	22.4244	16.5746	22.0994	19.1745	26.6493	18.8495	19.1745
419	11.4833	16.8999	20.5833	22.0994	16.5746	22.0994	18.8495	25.9994	19.1745	18.8495
420	11.05	16.8999	20.5833	22.0994	16.5746	22.4244	18.1995	25.9994	18.8495	19.4995
421	11.4833	17.1166	20.5833	22.0994	16.5746	22.4244	19.1745	25.9994	18.8495	18.8495
422	11.2666	17.1166	20.3666	22.4244	16.2496	22.4244	18.8495	26.3243	19.4995	19.1745
423	11.05	17.1166	20.7999	22.0994	16.2496	22.0994	18.5245	26.3243	19.1745	18.8495
424	11.4833	17.1166	20.3666	22.0994	16.5746	22.4244	19.1745	26.6493	19.4995	18.8495
425	11.4833	17.1166	20.5833	21.7745	16.2496	22.0994	19.1745	26.3243	18.8495	18.8495
426	11.4833	16.8999	20.5833	22.0994	16.2496	22.0994	18.8495	25.9994	19.1745	19.1745
427	11.2666	16.8999	20.3666	22.0994	16.5746	22.0994	19.1745	27.2993	19.4995	18.8495
428	11.4833	17.1166	20.5833	22.4244	15.9246	22.0994	18.5245	26.9743	19.1745	19.1745
429	11.2666	16.8999	20.3666	22.4244	16.5746	21.7745	18.8495	26.3243	19.1745	18.8495
430	11.2666	17.3333	20.5833	22.4244	16.8996	22.0994	18.8495	26.3243	19.1745	18.8495
431	11.2666	17.1166	20.3666	22.0994	16.8996	22.4244	18.5245	26.3243	19.1745	18.8495
432	11.2666	17.1166	20.5833	22.0994	16.5746	22.0994	19.1745	25.9994	19.1745	18.8495
433	11.2666	16.8999	20.3666	22.0994	16.5746	22.0994	19.1745	26.3243	19.1745	18.8495
434	11.4833	16.6833	20.5833	22.0994	16.8996	22.4244	19.1745	26.3243	19.1745	18.8495
435	11.4833	16.8999	20.3666	22.0994	16.5746	22.0994	18.8495	26.3243	19.1745	18.8495
436	11.2666	17.1166	20.3666	22.4244	16.8996	22.4244	19.1745	25.9994	18.5245	18.5245
437	11.2666	17.1166	20.3666	22.4244	16.5746	22.4244	19.1745	26.9743	18.8495	18.5245
438	11.2666	17.1166	20.1499	22.4244	16.5746	22.4244	18.5245	26.9743	18.8495	18.5245
439	11.4833	17.1166	20.5833	22.0994	16.5746	22.4244	18.8495	25.9994	19.4995	18.5245
440	11.4833	17.3333	20.5833	22.4244	16.2496	22.4244	19.1745	26.6493	18.8495	18.8495
441	11.2666	17.1166	20.5833	22.0994	16.2496	21.7745	18.8495	25.9994	19.1745	18.5245
442	11.4833	17.1166	20.1499	22.4244	16.2496	22.4244	18.8495	25.6744	19.4995	18.8495
443	11.4833	17.1166	20.1499	22.0994	15.9246	22.0994	19.1745	26.3243	19.4995	18.8495
444	11.2666	17.1166	20.5833	22.4244	16.2496	22.0994	19.1745	25.9994	19.1745	18.8495
445	11.2666	17.1166	20.3666	22.0994	16.2496	22.4244	19.1745	25.9994	18.8495	19.1745
446	11.4833	17.1166	20.3666	22.4244	16.2496	22.4244	18.8495	26.3243	18.8495	18.8495
447	11.2666	16.8999	20.1499	22.0994	16.2496	22.0994	18.8495	25.9994	19.1745	18.8495
448	11.05	17.1166	20.3666	22.4244	15.9246	22.0994	19.1745	25.9994	19.1745	18.8495
449	11.2666	16.8999	20.3666	22.4244	16.2496	22.0994	19.4995	25.9994	19.8245	18.8495
450	11.05	16.8999	20.3666	22.7494	16.2496	21.7745	18.8495	26.6493	19.1745	18.8495
451	11.05	17.1166	20.5833	22.4244	15.9246	22.0994	18.8495	25.9994	19.1745	18.5245
452	11.2666	16.8999	20.3666	22.4244	16.2496	22.0994	19.1745	25.9994	19.8245	18.5245
453	11.2666	17.1166	20.1499	22.4244	16.2496	22.0994	19.1745	26.3243	19.1745	18.5245
454	11.2666	16.8999	20.1499	22.4244	16.2496	22.4244	19.1745	26.3243	19.4995	18.8495
455	11.7	16.6833	20.1499	22.4244	16.8996	22.4244	19.1745	26.6493	19.4995	18.8495
456	11.4833	16.6833	20.1499	22.4244	16.2496	22.4244	19.1745	26.3243	19.1745	18.8495
457	11.2666	17.3333	20.1499	22.4244	16.2496	22.4244	18.8495	25.9994	19.1745	18.8495
458	10.8333	16.8999	20.3666	22.7494	16.2496	21.7745	19.1745	26.6493	19.8245	18.5245
459	11.2666	17.1166	20.3666	22.4244	16.2496	22.0994	19.1745	25.6744	19.1745	18.8495
460	11.2666	16.8999	20.5833	22.4244	15.9246	21.7745	18.8495	26.9743	19.8245	18.8495
461	11.4833	17.1166	20.3666	22.4244	16.2496	22.4244	19.1745	26.6493	19.1745	19.1745
462	11.2666	16.8999	20.1499	22.7494	15.9246	21.7745	18.8495	26.6493	19.1745	18.8495
463	11.4833	16.8999	20.3666	22.4244	16.2496	22.4244	18.8495	26.6493	19.1745	19.1745
464	11.4833	17.1166	20.1499	22.4244	16.2496	22.0994	19.1745	26.9743	19.4995	18.8495
465	11.2666	16.8999	20.5833	22.4244	16.2496	22.4244	18.8495	25.6744	19.1745	18.8495
466	11.05	17.1166	20.3666	22.4244	16.2496	22.0994	19.1745	26.6493	19.8245	18.8495
467	11.4833	17.1166	20.5833	22.4244	16.2496	21.7745	19.1745	26.9743	19.8245	18.8495
468	11.05	16.8999	20.5833	22.4244	16.5746	22.0994	18.8495	25.9994	19.8245	19.1745
469	11.4833	17.1166	20.5833	22.4244	16.5746	22.0994	19.1745	26.9743	18.8495	18.8495
470	11.2666	16.6833	20.5833	22.4244	16.2496	22.4244	18.8495	26.6493	19.1745	19.4995
471	11.2666	16.8999	20.3666	22.4244	16.2496	22.4244	19.1745	26.9743	19.1745	19.4995
472	11.4833	17.1166	20.5833	22.0994	16.2496	22.0994	19.1745	26.6493	19.1745	19.1745
473	11.4833	16.6833	20.5833	22.4244	16.2496	21.7745	19.1745	25.9994	19.4995	18.8495
474	11.4833	16.8999	20.5833	22.4244	16.2496	22.4244	18.8495	26.3243	19.1745	19.1745
475	11.2666	16.6833	20.1499	22.4244	16.2496	22.4244	19.8245	26.3243	19.1745	19.1745
476	11.4833	17.1166	20.3666	22.0994	16.2496	22.4244	19.1745	26.6493	19.1745	18.8495
477	11.4833	17.1166	20.5833	22.4244	16.5746	22.0994	18.8495	26.3243	18.8495	18.8495
478	11.05	16.6833	20.5833	22.4244	16.5746	21.7745	18.8495	25.9994	20.1495	19.1745
479	11.4833	16.6833	20.3666	22.4244	16.2496	22.4244	18.8495	26.9743	18.8495	18.8495
480	11.2666	17.1166	20.3666	22.7494	16.5746	22.0994	18.8495	26.6493	19.1745	18.8495
481	10.8333	16.8999	20.3666	22.4244	16.8996	22.0994	19.4995	25.6744	19.1745	18.8495
482	11.05	16.6833	20.3666	22.4244	16.5746	22.0994	19.1745	26.9743	19.4995	18.8495
483	11.2666	17.1166	20.3666	22.4244	16.5746	22.4244	19.1745	26.9743	19.4995	18.5245
484	11.4833	16.8999	20.1499	22.7494	16.8996	22.0994	19.1745	27.2993	18.8495	18.8495
485	10.8333	16.8999	20.3666	22.4244	16.5746	22.4244	19.8245	26.3243	18.5245	18.8495
486	11.2666	16.6833	20.3666	22.4244	16.5746	22.0994	19.4995	25.9994	19.4995	18.8495
487	11.2666	17.1166	20.5833	22.4244	16.5746	22.4244	18.5245	26.9743	19.4995	18.8495
488	11.4833	16.8999	20.1499	22.4244	16.5746	22.0994	19.1745	26.9743	19.4995	18.8495
489	11.4833	16.8999	20.3666	22.4244	16.5746	22.0994	18.8495	27.2993	18.8495	18.8495
490	11.4833	16.8999	20.3666	22.4244	16.8996	22.4244	18.8495	26.9743	19.1745	18.8495
491	11.2666	16.6833	20.1499	22.7494	16.8996	22.0994	18.8495	26.3243	20.4745	19.1745
492	11.4833	16.8999	20.3666	22.4244	16.8996	22.0994	19.1745	26.9743	18.8495	19.1745
493	11.4833	16.6833	20.3666	22.0994	16.5746	22.0994	19.1745	26.9743	18.8495	18.5245
494	11.2666	16.8999	20.3666	22.4244	16.5746	22.0994	19.1745	27.2993	19.1745	18.5245
495	11.2666	16.6833	20.3666	22.0994	16.8996	22.4244	19.1745	26.6493	19.1745	18.8495
496	11.4833	16.6833	20.3666	22.4244	16.5746	22.4244	19.1745	26.9743	19.1745	18.8495
497	11.2666	16.8999	20.5833	22.0994	16.8996	22.0994	18.8495	26.9743	19.1745	18.8495
498	11.2666	16.6833	20.3666	22.4244	16.8996	22.4244	19.4995	26.6493	19.1745	18.5245
499	11.05	16.8999	20.3666	22.4244	16.8996	22.4244	19.1745	26.9743	18.8495	18.8495
500	11.2666	16.6833	20.1499	22.4244	16.5746	22.4244	19.1745	26.9743	19.1745	18.8495
501	11.4833	16.8999	20.3666	22.4244	16.5746	22.0994	19.1745	26.9743	18.8495	18.8495
502	10.8333	17.1166	20.3666	22.4244	16.2496	22.4244	19.1745	26.9743	19.4995	19.1745
503	11.05	17.1166	20.1499	22.4244	16.2496	22.0994	18.8495	26.6493	19.8245	19.1745
504	11.2666	16.6833	20.3666	22.4244	16.5746	22.4244	19.4995	26.9743	19.1745	18.5245
505	11.2666	16.6833	20.5833	22.4244	16.5746	22.7494	19.1745	26.6493	19.1745	19.1745
506	11.2666	17.1166	20.5833	22.4244	16.5746	22.4244	19.4995	26.9743	19.1745	18.8495
507	11.4833	16.8999	20.5833	22.4244	16.2496	22.4244	19.4995	26.6493	19.1745	18.8495
508	11.05	17.1166	20.1499	22.7494	16.5746	23.0744	19.4995	27.6243	19.4995	19.1745
509	11.05	17.1166	20.3666	22.7494	15.9246	21.7745	19.1745	26.9743	20.1495	19.1745
510	11.2666	16.8999	20.3666	22.4244	16.5746	22.0994	19.1745	27.2993	19.4995	18.8495
511	11.2666	17.1166	20.1499	22.7494	15.9246	23.0744	19.1745	27.6243	19.4995	18.8495
512	11.2666	17.1166	20.5833	22.4244	15.9246	22.0994	18.8495	26.9743	18.5245	18.8495
513	11.05	16.8999	20.3666	22.4244	15.9246	22.7494	19.4995	25.9994	18.8495	19.1745
514	11.2666	17.1166	20.5833	22.7494	15.5996	22.7494	19.1745	26.9743	18.5245	19.1745
515	11.05	16.8999	20.1499	22.7494	16.2496	22.7494	19.4995	26.3243	18.8495	18.8495
516	11.2666	16.8999	20.3666	22.4244	15.5996	23.0744	19.1745	26.9743	19.1745	18.8495
517	11.05	17.1166	20.1499	22.7494	15.9246	23.0744	18.8495	26.9743	18.5245	18.8495
518	11.05	17.1166	20.5833	22.4244	16.2496	23.0744	19.8245	26.6493	18.8495	18.8495
519	11.4833	17.1166	20.3666	22.4244	15.9246	22.4244	19.4995	26.9743	19.1745	18.8495
520	11.05	17.3333	20.1499	22.7494	15.9246	22.7494	19.4995	26.9743	18.1995	18.8495
521	11.2666	17.1166	20.1499	22.4244	16.2496	23.0744	19.1745	26.3243	18.8495	18.8495
522	11.2666	17.1166	20.3666	22.7494	15.9246	22.7494	18.8495	27.2993	19.4995	18.8495
523	11.05	17.1166	20.3666	22.4244	15.9246	22.0994	19.4995	27.2993	18.8495	18.8495
524	11.05	16.8999	20.3666	22.4244	15.5996	22.7494	19.4995	26.6493	19.1745	18.8495
525	11.2666	17.3333	20.1499	22.4244	15.9246	22.7494	19.4995	25.9994	19.1745	18.8495
526	11.05	17.1166	20.1499	22.4244	16.2496	21.7745	19.4995	27.2993	18.5245	18.8495
527	11.2666	16.8999	20.5833	22.4244	15.9246	22.0994	19.1745	26.6493	18.5245	19.1745
528	11.05	17.1166	20.5833	22.4244	15.9246	22.7494	19.1745	26.9743	19.1745	18.8495
529	11.05	16.8999	20.5833	22.4244	15.9246	22.0994	19.4995	26.9743	18.1995	19.1745
530	10.8333	17.3333	20.5833	22.4244	16.5746	22.4244	19.1745	26.9743	19.1745	18.8495
531	11.2666	17.3333	20.5833	22.4244	16.2496	22.7494	19.1745	26.6493	18.8495	19.1745
532	11.05	17.3333	20.7999	22.4244	16.5746	22.7494	19.1745	27.6243	18.8495	18.8495
533	11.2666	17.5499	21.0166	22.4244	16.2496	22.0994	19.1745	26.6493	19.4995	18.8495
534	11.2666	17.3333	20.5833	22.4244	15.9246	22.4244	19.1745	26.9743	18.8495	19.4995
535	11.2666	17.1166	20.5833	22.4244	16.2496	22.4244	19.4995	26.6493	18.8495	18.8495
536	11.05	17.5499	20.7999	22.7494	16.2496	22.0994	19.4995	27.6243	18.8495	18.5245
537	11.2666	17.3333	20.5833	22.4244	16.5746	22.4244	19.1745	27.2993	19.1745	18.8495
538	11.2666	17.5499	20.7999	22.7494	16.5746	22.4244	19.1745	26.6493	18.8495	18.8495
539	11.2666	17.1166	20.7999	22.7494	16.2496	22.4244	18.8495	26.9743	18.8495	19.1745
540	11.05	17.3333	20.5833	22.7494	15.9246	21.7745	19.1745	27.2993	18.8495	18.5245
541	11.2666	17.1166	20.5833	22.7494	16.2496	22.0994	19.1745	27.6243	18.8495	18.8495
542	11.7	16.8999	20.7999	22.7494	16.2496	22.4244	19.1745	27.2993	19.1745	19.1745
543	11.05	17.3333	20.7999	22.7494	16.2496	21.7745	19.4995	27.2993	19.1745	19.1745
544	11.4833	17.1166	20.5833	22.7494	16.5746	22.0994	19.4995	27.2993	19.1745	18.8495
545	11.4833	17.1166	20.7999	22.7494	16.2496	21.7745	19.4995	26.9743	19.1745	18.8495
546	11.2666	16.8999	20.7999	22.7494	16.2496	22.4244	18.8495	26.9743	19.1745	19.1745
547	11.2666	17.5499	20.7999	22.7494	15.9246	21.7745	19.1745	27.2993	19.1745	18.8495
548	11.2666	16.8999	20.7999	22.7494	15.9246	22.0994	19.1745	27.2993	19.8245	19.1745
549	10.6166	17.5499	20.7999	22.7494	15.9246	21.7745	19.1745	26.9743	19.4995	18.8495
550	11.05	17.1166	20.7999	22.7494	16.2496	21.4495	19.4995	27.2993	19.8245	19.1745
551	11.05	17.1166	20.7999	22.7494	16.2496	21.1245	19.4995	27.2993	19.8245	19.1745
552	11.05	17.3333	20.7999	22.7494	15.9246	22.0994	19.4995	26.9743	19.1745	19.1745
553	11.4833	17.1166	20.7999	22.7494	15.9246	22.0994	19.8245	27.2993	19.1745	19.1745
554	11.05	17.7666	20.7999	22.7494	16.2496	22.0994	19.8245	27.6243	18.8495	19.1745
555	11.2666	17.1166	20.7999	22.7494	16.2496	22.0994	19.4995	26.9743	19.4995	18.8495
556	10.8333	17.3333	20.3666	22.7494	15.9246	22.0994	19.4995	27.2993	18.5245	19.1745
557	10.8333	16.8999	20.7999	22.7494	15.9246	22.0994	19.1745	26.6493	19.8245	18.8495
558	10.4	17.1166	20.5833	22.7494	16.2496	22.0994	19.4995	26.9743	19.1745	18.5245
559	10.8333	17.3333	20.7999	22.7494	15.9246	22.0994	20.1495	27.2993	19.4995	18.5245
560	11.2666	17.1166	20.5833	22.7494	16.2496	22.0994	19.4995	26.9743	19.8245	18.5245
561	10.6166	17.1166	20.7999	22.7494	15.9246	21.7745	19.1745	27.2993	19.4995	18.5245
562	10.8333	17.3333	20.7999	22.7494	15.9246	21.4495	19.8245	27.2993	19.1745	18.8495
563	10.8333	17.5499	20.7999	22.7494	15.9246	22.0994	19.4995	27.2993	19.1745	18.8495
564	10.8333	16.8999	20.7999	22.7494	15.9246	22.4244	20.1495	27.2993	19.1745	18.8495
565	11.05	16.8999	20.7999	22.7494	15.9246	22.0994	19.1745	27.6243	19.4995	18.5245
566	10.6166	17.7666	20.7999	22.7494	15.9246	22.0994	19.4995	27.6243	20.1495	18.5245
567	10.4	17.1166	20.7999	22.7494	15.9246	22.0994	19.4995	27.6243	19.1745	18.1995
568	10.8333	16.8999	20.7999	22.7494	16.2496	22.0994	19.1745	26.9743	19.4995	18.5245
569	11.05	16.8999	20.5833	22.7494	16.2496	21.7745	19.4995	25.9994	19.4995	18.5245
570	10.8333	17.1166	20.7999	22.7494	16.2496	22.0994	19.4995	26.6493	19.1745	18.5245
571	10.8333	16.8999	20.7999	22.7494	16.2496	22.0994	19.8245	26.9743	19.1745	18.8495
572	11.05	17.1166	20.7999	22.7494	16.2496	21.7745	19.1745	26.9743	19.1745	18.5245
573	11.05	16.8999	20.7999	22.7494	15.9246	22.4244	19.4995	26.6493	19.1745	18.1995
574	10.8333	17.5499	20.7999	22.7494	15.9246	22.0994	19.4995	27.2993	19.8245	19.1745
575	11.05	17.1166	20.7999	22.7494	16.2496	21.7745	19.1745	27.2993	19.8245	18.8495
576	11.05	16.8999	20.7999	23.0744	15.9246	22.0994	19.8245	26.3243	19.4995	18.8495
577	11.05	16.8999	20.7999	22.7494	16.2496	22.0994	19.4995	26.6493	19.8245	18.8495
578	11.2666	17.1166	21.0166	22.7494	16.5746	22.0994	19.4995	26.9743	19.8245	18.1995
579	10.6166	17.1166	20.7999	22.7494	16.5746	22.0994	19.1745	26.9743	19.4995	18.5245
580	10.8333	17.3333	21.0166	22.7494	16.5746	22.0994	19.8245	26.9743	19.1745	18.1995
581	11.05	17.1166	21.0166	22.7494	16.2496	22.0994	19.8245	26.9743	19.1745	18.5245
582	11.05	17.1166	20.7999	22.7494	16.5746	22.0994	19.4995	27.2993	19.1745	18.5245
583	11.05	17.1166	20.7999	22.7494	16.5746	21.7745	19.4995	27.2993	19.8245	19.1745
584	11.05	17.1166	20.7999	22.7494	16.2496	22.0994	19.4995	26.6493	19.4995	18.8495
585	10.6166	16.8999	20.7999	22.7494	16.5746	21.7745	19.8245	26.9743	19.4995	18.8495
586	11.05	17.3333	20.5833	22.7494	15.9246	22.0994	19.4995	27.2993	19.4995	18.8495
587	10.8333	17.1166	20.7999	22.7494	15.9246	22.4244	19.8245	27.2993	19.8245	18.5245
588	10.8333	16.8999	21.0166	22.7494	15.9246	22.4244	19.4995	27.2993	19.8245	18.8495
589	11.05	17.1166	20.5833	22.7494	15.9246	22.0994	19.4995	27.2993	19.4995	18.8495
590	10.8333	17.1166	20.7999	22.7494	15.9246	22.4244	19.4995	27.9493	19.4995	18.1995
591	11.2666	16.8999	21.0166	22.7494	15.9246	22.4244	19.1745	26.9743	19.4995	18.5245
592	11.2666	17.1166	21.0166	22.7494	16.2496	22.0994	19.4995	27.6243	19.4995	18.8495
593	11.05	17.1166	21.4499	22.7494	16.2496	22.4244	19.8245	26.6493	19.8245	18.5245
594	11.2666	16.8999	20.7999	22.7494	16.2496	21.7745	19.4995	27.6243	19.1745	18.1995
595	10.8333	16.8999	21.2333	22.7494	16.2496	22.0994	19.4995	27.6243	19.4995	18.5245
596	11.2666	17.1166	20.7999	22.7494	16.2496	21.7745	19.1745	26.6493	18.8495	18.8495
597	11.4833	16.8999	21.0166	22.7494	16.2496	22.4244	19.1745	26.9743	19.4995	18.5245
598	11.05	16.8999	21.0166	22.7494	15.9246	22.4244	19.4995	27.9493	19.8245	18.8495
599	11.2666	17.1166	21.0166	22.7494	16.2496	21.4495	19.8245	26.9743	19.8245	18.5245
600	11.05	17.1166	20.7999	23.0744	15.9246	21.7745	18.8495	27.2993	19.4995	18.1995
601	11.05	17.1166	20.7999	22.7494	16.2496	22.0994	19.1745	27.2993	19.4995	18.8495
602	10.8333	17.1166	21.2333	22.7494	16.2496	21.7745	19.8245	27.6243	19.4995	18.5245
603	11.05	16.8999	21.2333	22.7494	15.9246	22.0994	19.4995	27.2993	19.1745	18.8495
604	11.05	17.1166	20.7999	22.7494	16.2496	22.0994	19.4995	27.2993	19.8245	18.5245
605	11.05	17.1166	20.7999	22.7494	16.2496	22.4244	19.8245	27.2993	19.8245	18.5245
606	11.05	16.8999	21.4499	22.7494	15.9246	22.4244	19.4995	26.9743	19.1745	18.5245
607	10.6166	16.8999	21.0166	22.7494	16.2496	22.7494	19.4995	26.9743	19.4995	18.5245
608	11.05	16.8999	21.4499	22.7494	16.2496	22.4244	19.8245	26.6493	19.8245	18.5245
609	10.8333	17.1166	21.0166	22.7494	16.5746	22.0994	19.8245	27.2993	19.8245	18.5245
610	10.8333	17.1166	20.7999	22.7494	16.2496	22.4244	19.4995	27.2993	20.1495	18.5245
611	10.6166	16.8999	20.7999	22.7494	16.2496	21.7745	19.8245	26.6493	19.8245	18.5245
612	11.05	17.1166	21.2333	22.7494	16.8996	21.7745	19.1745	26.9743	19.4995	18.1995
613	11.2666	17.1166	21.0166	23.0744	16.5746	21.7745	19.4995	26.9743	19.4995	18.5245
614	10.6166	17.1166	21.0166	22.7494	16.5746	22.4244	19.8245	26.9743	19.4995	18.5245
615	11.05	16.8999	20.7999	22.7494	16.5746	22.4244	19.1745	27.6243	19.4995	18.5245
616	10.8333	17.1166	20.5833	22.7494	16.5746	22.4244	19.4995	27.2993	19.4995	19.1745
617	10.8333	17.3333	20.5833	23.0744	16.5746	22.0994	20.1495	26.9743	19.8245	18.8495
618	11.05	17.1166	21.0166	22.7494	16.2496	22.0994	19.1745	27.2993	19.8245	18.8495
619	10.6166	17.1166	21.0166	22.7494	16.5746	22.0994	19.4995	26.6493	19.4995	18.5245
620	11.05	17.1166	21.0166	22.7494	16.5746	21.7745	19.8245	26.9743	19.8245	18.5245
621	11.05	17.1166	20.7999	22.7494	16.8996	22.0994	19.4995	26.9743	19.4995	18.5245
622	10.8333	16.8999	20.7999	23.0744	15.9246	22.4244	19.1745	27.2993	19.8245	18.8495
623	10.4	17.1166	21.0166	22.7494	16.2496	22.4244	19.4995	27.6243	19.8245	18.1995
624	10.8333	17.1166	20.7999	22.7494	16.5746	22.0994	19.1745	26.9743	19.8245	18.5245
625	10.6166	17.1166	20.5833	22.7494	16.5746	22.0994	19.4995	26.6493	19.4995	18.5245
626	11.05	16.8999	20.7999	22.7494	16.5746	22.4244	19.8245	26.6493	19.1745	18.5245
627	10.6166	17.1166	20.5833	22.7494	16.2496	22.0994	19.4995	27.2993	19.1745	19.1745
628	11.05	16.8999	21.2333	22.7494	16.5746	22.0994	19.4995	27.2993	19.4995	18.5245
629	10.8333	16.8999	20.7999	23.0744	16.5746	22.4244	20.1495	27.6243	19.4995	18.5245
630	11.4833	16.8999	20.7999	22.7494	16.2496	22.7494	19.8245	27.6243	19.8245	19.1745
631	10.8333	17.1166	21.2333	22.7494	16.2496	22.4244	19.8245	27.6243	19.4995	18.8495
632	11.05	16.8999	21.2333	22.7494	16.2496	22.0994	19.4995	27.2993	19.1745	18.8495
633	11.05	16.8999	20.7999	23.0744	15.9246	22.0994	19.4995	27.2993	18.8495	19.4995
634	10.4	17.1166	20.7999	22.7494	16.2496	22.4244	19.4995	27.2993	19.8245	19.8245
635	10.8333	17.3333	20.5833	22.7494	15.9246	22.0994	19.4995	27.6243	19.4995	19.8245
636	10.6166	17.1166	21.2333	22.7494	15.9246	22.4244	19.4995	27.6243	20.1495	18.8495
637	11.05	16.8999	20.7999	22.7494	16.8996	22.0994	19.1745	26.9743	19.8245	19.1745
638	11.05	17.1166	21.0166	22.7494	16.2496	22.0994	19.4995	26.9743	19.1745	18.8495
639	10.8333	16.8999	20.7999	23.0744	16.2496	22.4244	19.8245	26.3243	19.1745	18.5245
640	11.05	17.1166	20.5833	22.7494	16.2496	22.0994	19.8245	26.6493	19.8245	18.8495
641	11.05	16.8999	20.7999	22.7494	16.2496	22.0994	19.1745	27.6243	19.4995	19.1745
642	10.8333	16.8999	20.5833	23.0744	16.2496	22.4244	19.8245	26.6493	19.1745	19.1745
643	10.8333	16.8999	20.7999	22.7494	15.9246	22.4244	20.1495	27.6243	19.1745	19.1745
644	11.05	16.8999	20.5833	22.7494	15.9246	22.4244	19.1745	26.9743	19.4995	18.8495
645	10.8333	16.8999	21.0166	23.0744	15.9246	22.4244	19.8245	27.6243	19.8245	19.1745
646	10.4	17.1166	20.5833	22.7494	15.9246	22.0994	19.8245	27.6243	19.8245	19.1745
647	11.05	17.1166	20.7999	22.7494	15.9246	22.4244	19.8245	26.9743	19.8245	19.1745
648	11.05	16.8999	20.5833	22.7494	15.5996	22.0994	19.8245	26.9743	19.4995	19.4995
649	11.05	16.8999	20.7999	23.0744	16.2496	22.0994	20.1495	26.9743	19.4995	19.1745
650	11.05	16.8999	21.0166	22.7494	16.2496	22.0994	19.4995	27.9493	19.4995	19.4995
651	11.05	17.1166	20.7999	23.0744	15.9246	22.0994	20.1495	27.6243	18.8495	19.4995
652	10.8333	17.1166	20.7999	23.0744	15.9246	21.7745	19.8245	27.2993	19.8245	19.1745
653	11.05	16.6833	21.2333	23.3994	15.9246	21.7745	19.4995	26.9743	19.1745	18.8495
654	10.6166	16.8999	21.0166	23.0744	15.9246	21.7745	19.4995	27.2993	19.4995	19.1745
655	11.05	16.4666	20.7999	22.7494	15.2746	22.7494	19.8245	27.2993	19.4995	18.5245
656	11.05	16.8999	20.7999	22.7494	15.9246	22.4244	19.8245	27.9493	19.8245	18.8495
657	10.8333	16.8999	20.5833	23.0744	15.9246	22.0994	19.4995	27.6243	19.4995	19.1745
658	10.8333	17.1166	20.5833	22.7494	15.9246	22.0994	19.8245	27.2993	19.8245	19.4995
659	10.8333	16.4666	20.7999	22.7494	15.9246	22.7494	19.4995	26.3243	19.4995	19.1745
660	11.05	16.4666	20.5833	22.7494	15.9246	22.0994	19.4995	26.9743	20.4745	19.4995
661	11.4833	16.6833	20.3666	23.0744	15.9246	22.4244	19.8245	27.9493	19.8245	19.1745
662	11.05	16.6833	20.7999	23.0744	16.2496	22.0994	19.1745	27.6243	19.8245	19.1745
663	10.8333	16.8999	20.7999	23.0744	16.2496	22.0994	19.8245	27.2993	19.8245	19.4995
664	10.8333	16.6833	20.5833	23.0744	15.9246	22.0994	20.1495	27.2993	19.4995	19.4995
665	11.05	16.6833	20.7999	23.0744	15.9246	22.0994	19.8245	27.6243	19.4995	19.1745
666	10.8333	16.8999	20.7999	22.7494	16.2496	22.0994	19.8245	27.2993	19.8245	19.1745
667	10.6166	16.6833	21.0166	22.7494	15.9246	22.0994	19.4995	27.6243	19.8245	19.8245
668	10.8333	16.6833	20.7999	22.7494	15.9246	22.0994	19.4995	27.6243	19.8245	19.4995
669	10.4	16.8999	20.7999	22.7494	15.9246	22.0994	19.1745	27.2993	19.4995	18.8495
670	10.8333	17.1166	20.5833	23.0744	15.9246	21.7745	19.8245	27.6243	19.1745	19.8245
671	10.6166	16.8999	20.5833	23.0744	15.5996	22.0994	19.4995	27.9493	19.1745	19.4995
672	11.05	16.6833	20.5833	23.0744	15.9246	22.0994	19.4995	27.9493	19.8245	19.4995
673	10.6166	16.6833	20.5833	23.0744	15.9246	22.0994	20.1495	27.6243	19.8245	19.4995
674	10.8333	16.8999	20.5833	23.0744	15.9246	22.0994	19.8245	27.2993	19.8245	19.1745
675	11.05	16.6833	20.5833	22.7494	15.5996	22.0994	19.4995	27.9493	19.4995	19.1745
676	10.8333	16.8999	20.5833	23.0744	15.5996	22.0994	19.4995	26.6493	20.4745	19.4995
677	10.6166	16.8999	21.0166	22.7494	15.9246	22.4244	19.8245	26.9743	20.4745	19.1745
678	11.05	16.8999	20.5833	23.0744	15.5996	22.0994	20.1495	28.2743	19.4995	19.1745
679	10.8333	16.8999	20.5833	23.0744	16.2496	22.0994	19.4995	27.2993	19.8245	19.1745
680	11.05	16.6833	20.3666	22.7494	16.2496	22.4244	19.4995	27.2993	19.4995	19.1745
681	11.05	16.6833	21.0166	23.0744	15.5996	22.4244	19.4995	26.3243	19.8245	19.8245
682	10.8333	16.6833	20.7999	23.0744	16.2496	22.0994	19.8245	26.9743	19.8245	19.4995
683	10.8333	16.6833	20.7999	23.0744	15.5996	22.0994	19.8245	27.6243	19.8245	19.4995
684	11.05	16.6833	20.7999	23.0744	15.9246	22.4244	19.4995	27.6243	19.4995	19.1745
685	10.8333	16.6833	21.0166	23.0744	16.2496	22.4244	19.8245	27.9493	19.4995	19.4995
686	11.05	16.8999	20.7999	22.7494	15.5996	22.4244	19.8245	27.9493	19.8245	18.8495
687	10.8333	16.6833	20.7999	22.7494	15.5996	22.0994	20.1495	27.2993	19.4995	19.1745
688	11.05	16.6833	20.7999	23.0744	15.9246	22.0994	19.4995	27.2993	19.8245	18.8495
689	11.2666	16.8999	20.7999	23.0744	15.9246	22.4244	19.8245	27.2993	19.8245	19.1745
690	10.6166	16.2499	20.7999	23.0744	15.5996	22.0994	20.1495	27.2993	19.4995	19.1745
691	10.8333	16.6833	20.7999	23.0744	15.9246	21.7745	19.8245	27.9493	19.4995	19.1745
692	10.8333	16.6833	20.5833	23.0744	16.2496	22.4244	19.4995	27.6243	19.4995	19.4995
693	11.2666	17.1166	20.7999	23.0744	15.9246	22.0994	19.1745	27.6243	19.8245	19.4995
694	10.8333	16.6833	20.7999	22.7494	15.5996	22.0994	19.8245	26.6493	20.1495	19.1745
695	10.8333	16.8999	20.7999	23.0744	15.5996	22.0994	19.8245	26.9743	19.4995	19.1745
696	10.6166	16.6833	20.7999	22.7494	15.2746	22.0994	20.1495	27.2993	19.4995	18.8495
697	10.8333	16.6833	21.0166	23.0744	15.5996	22.0994	19.4995	27.2993	19.8245	19.1745
698	10.6166	16.8999	20.5833	23.0744	16.2496	22.0994	19.8245	27.6243	19.4995	19.1745
699	11.05	16.8999	21.0166	22.7494	14.9496	22.0994	19.4995	26.9743	19.4995	19.1745
700	11.05	16.8999	21.0166	23.0744	14.9496	22.0994	20.1495	27.2993	19.1745	19.1745
701	10.8333	16.8999	20.7999	22.7494	15.2746	22.0994	19.4995	27.6243	19.8245	19.1745
702	10.8333	16.8999	20.7999	23.0744	15.5996	22.0994	19.8245	27.6243	19.4995	18.8495
703	10.8333	16.8999	20.7999	23.0744	15.2746	22.4244	20.1495	27.6243	19.1745	19.1745
704	10.6166	16.8999	20.7999	22.7494	14.9496	22.0994	19.8245	27.6243	19.4995	19.1745
705	10.6166	16.8999	21.0166	23.0744	14.9496	22.0994	20.1495	27.6243	19.4995	19.1745
706	10.6166	17.1166	20.7999	23.0744	15.2746	22.0994	19.4995	27.6243	19.8245	19.1745
707	10.8333	16.8999	21.0166	23.0744	14.9496	22.4244	20.1495	27.2993	19.4995	19.1745
708	10.8333	16.6833	20.7999	23.0744	14.9496	22.4244	19.8245	27.6243	19.8245	19.4995
709	11.05	16.6833	20.7999	22.7494	16.2496	22.4244	19.8245	27.6243	19.8245	19.1745
710	10.6166	16.6833	21.0166	22.7494	15.2746	22.4244	19.8245	27.6243	19.8245	19.1745
711	11.05	16.6833	21.0166	23.0744	15.2746	22.7494	19.8245	27.6243	20.1495	19.1745
712	11.05	16.6833	21.0166	23.0744	15.5996	22.0994	19.8245	28.2743	20.1495	19.4995
713	11.2666	16.8999	21.0166	23.0744	15.9246	22.0994	20.1495	27.2993	19.4995	19.1745
714	10.8333	16.8999	20.7999	22.7494	15.5996	22.4244	19.8245	27.6243	19.8245	19.8245
715	11.05	17.3333	21.0166	23.0744	15.5996	21.7745	19.8245	27.9493	20.1495	19.4995
716	10.8333	16.8999	20.7999	22.7494	15.5996	22.0994	19.8245	27.2993	19.4995	19.4995
717	10.6166	16.8999	21.0166	22.7494	15.5996	22.4244	20.1495	27.2993	20.1495	19.4995
718	11.05	16.6833	21.0166	23.0744	15.9246	22.0994	20.1495	27.2993	19.4995	19.4995
719	10.8333	17.3333	20.7999	23.0744	15.9246	21.7745	19.8245	27.6243	20.1495	19.4995
720	11.05	16.8999	21.0166	22.7494	15.5996	22.4244	19.8245	27.6243	19.8245	19.4995
721	10.6166	16.8999	20.7999	23.0744	16.2496	22.0994	20.1495	27.2993	19.4995	19.4995
722	10.6166	16.6833	21.0166	22.7494	16.2496	22.4244	20.1495	27.6243	19.8245	19.4995
723	10.8333	16.6833	20.7999	23.0744	16.2496	22.0994	20.1495	27.9493	19.8245	19.4995
724	11.05	16.6833	21.0166	22.7494	15.9246	21.7745	19.8245	27.6243	19.4995	19.4995
725	10.8333	16.8999	21.0166	23.0744	15.9246	22.4244	19.8245	27.6243	19.8245	19.4995
726	11.05	17.1166	21.0166	22.7494	16.2496	22.0994	19.4995	27.9493	19.4995	19.4995
727	10.8333	16.8999	21.0166	23.0744	15.9246	22.0994	20.1495	27.9493	20.1495	19.4995
728	10.8333	16.6833	21.0166	22.7494	15.9246	22.0994	19.8245	27.6243	20.1495	19.1745
729	10.8333	16.6833	21.0166	23.0744	16.2496	22.0994	20.1495	27.2993	19.4995	19.1745
730	10.8333	16.8999	21.0166	23.0744	15.5996	22.0994	19.8245	27.9493	20.1495	19.1745
731	11.05	16.8999	21.0166	23.0744	15.5996	22.0994	19.8245	27.6243	20.1495	19.1745
732	10.6166	16.8999	21.0166	23.0744	15.9246	22.4244	20.1495	27.9493	19.4995	19.1745
733	10.4	16.4666	21.0166	23.0744	15.5996	22.0994	19.8245	27.6243	19.8245	19.1745
734	10.6166	16.4666	21.0166	22.7494	15.9246	22.7494	20.1495	27.2993	19.4995	19.4995
735	10.6166	16.4666	21.0166	23.0744	16.2496	22.0994	19.8245	27.9493	20.1495	19.4995
736	11.2666	16.6833	21.0166	22.7494	15.9246	22.4244	19.8245	27.6243	20.7995	19.4995
737	10.8333	16.8999	21.0166	23.0744	16.2496	22.4244	19.8245	27.6243	19.8245	19.4995
738	10.6166	16.6833	21.0166	22.7494	15.9246	22.0994	19.4995	27.2993	20.1495	19.1745
739	10.6166	16.6833	21.0166	23.0744	15.9246	21.7745	19.8245	27.9493	19.4995	19.4995
740	10.4	16.6833	21.0166	22.7494	15.9246	22.0994	20.1495	27.9493	20.1495	19.4995
741	10.8333	16.8999	21.0166	23.0744	16.2496	21.7745	20.1495	27.9493	19.4995	19.4995
742	10.6166	17.1166	21.0166	23.0744	15.9246	22.4244	20.4745	27.6243	19.8245	19.4995
743	10.8333	16.6833	21.0166	22.7494	15.9246	22.0994	19.8245	27.9493	20.1495	19.1745
744	10.8333	16.4666	21.2333	23.0744	15.5996	22.4244	19.8245	28.2743	20.1495	19.1745
745	10.8333	16.8999	21.0166	23.0744	15.9246	21.7745	19.8245	27.6243	19.4995	19.4995
746	10.6166	16.6833	21.0166	23.0744	15.9246	22.4244	19.8245	26.6493	19.4995	19.4995
747	10.6166	16.8999	21.0166	22.7494	16.2496	22.0994	19.8245	27.2993	19.8245	19.4995
748	11.05	16.8999	21.0166	22.7494	16.2496	22.7494	20.1495	27.2993	19.4995	19.4995
749	11.05	16.6833	21.4499	22.7494	16.2496	22.0994	19.8245	27.6243	19.8245	19.4995
750	10.4	16.6833	21.0166	22.7494	15.9246	22.0994	20.1495	26.6493	20.1495	19.4995
751	11.05	16.8999	21.0166	22.7494	15.9246	22.0994	19.8245	27.2993	20.1495	19.4995
752	11.05	16.6833	21.0166	22.7494	16.2496	21.7745	20.1495	27.2993	20.1495	19.4995
753	10.4	16.6833	21.2333	22.7494	16.2496	22.0994	20.1495	27.2993	20.1495	19.1745
754	10.8333	16.8999	21.0166	22.4244	15.9246	21.4495	19.8245	27.6243	20.1495	19.4995
755	10.8333	16.6833	21.0166	22.7494	16.2496	22.0994	19.4995	27.2993	20.1495	19.4995
756	10.6166	16.4666	21.0166	22.7494	15.9246	22.0994	20.1495	27.6243	19.8245	19.1745
757	11.05	16.2499	21.0166	22.7494	16.2496	21.7745	19.8245	27.6243	19.8245	19.8245
758	10.8333	16.4666	21.0166	22.7494	16.2496	22.0994	19.8245	27.2993	19.8245	19.4995
759	10.8333	16.6833	21.0166	22.7494	16.5746	22.0994	20.1495	27.2993	19.8245	19.4995
760	10.8333	16.6833	21.0166	22.7494	16.2496	21.7745	19.8245	27.6243	19.8245	19.4995
761	10.8333	16.8999	21.2333	22.4244	16.2496	22.4244	19.8245	27.2993	19.4995	19.1745
762	10.8333	16.4666	21.0166	22.4244	16.5746	22.0994	19.8245	27.6243	20.1495	19.4995
763	11.05	16.4666	21.2333	22.7494	16.2496	22.4244	20.1495	27.2993	19.4995	19.1745
764	10.6166	16.4666	21.0166	22.7494	15.9246	22.0994	19.8245	27.6243	19.4995	19.4995
765	11.05	16.6833	21.2333	22.7494	16.2496	21.7745	20.1495	27.6243	20.1495	19.8245
766	10.4	16.4666	21.0166	22.4244	15.9246	21.7745	19.8245	27.6243	20.1495	19.1745
767	10.8333	16.6833	21.0166	22.7494	15.9246	22.0994	20.1495	27.2993	19.8245	19.1745
768	10.6166	16.4666	21.0166	22.7494	15.5996	22.0994	19.8245	26.9743	20.1495	19.4995
769	11.05	16.4666	21.0166	22.7494	15.9246	22.0994	19.8245	27.2993	19.8245	19.4995
770	10.4	16.6833	21.0166	22.7494	16.2496	21.7745	20.1495	27.6243	20.1495	19.4995
771	10.6166	16.4666	21.2333	22.7494	15.9246	22.0994	19.8245	27.9493	19.8245	19.8245
772	10.6166	16.8999	21.0166	22.7494	16.2496	22.0994	19.8245	27.9493	19.8245	19.8245
773	10.4	16.6833	21.0166	22.4244	15.9246	22.0994	19.4995	27.9493	19.8245	19.4995
774	10.8333	16.6833	21.2333	22.7494	15.9246	22.0994	20.1495	27.2993	20.1495	19.4995
775	11.2666	16.4666	21.0166	22.4244	16.2496	22.0994	20.1495	27.2993	19.4995	19.4995
776	10.8333	16.4666	21.2333	22.4244	16.2496	22.0994	19.8245	27.6243	19.8245	19.4995
777	11.05	16.2499	21.0166	22.4244	16.2496	22.0994	19.4995	27.6243	19.4995	19.1745
778	11.05	16.8999	21.0166	22.7494	16.2496	22.0994	19.1745	26.9743	19.8245	19.4995
779	11.05	16.6833	21.0166	22.7494	16.2496	22.0994	19.1745	27.6243	19.4995	19.1745
780	10.8333	16.4666	21.0166	22.7494	15.9246	22.0994	19.1745	27.9493	19.8245	19.4995
781	10.6166	16.6833	21.0166	22.7494	16.2496	21.7745	19.1745	28.2743	19.8245	19.4995
782	11.05	16.4666	20.7999	22.7494	16.2496	21.7745	19.1745	27.6243	19.1745	19.4995
783	10.8333	16.4666	21.0166	22.7494	16.2496	22.0994	18.8495	27.2993	19.1745	19.1745
784	10.6166	16.8999	21.0166	22.4244	16.8996	22.0994	19.1745	27.6243	19.8245	19.4995
785	10.8333	17.1166	21.0166	22.7494	16.2496	21.7745	19.1745	27.9493	18.8495	19.1745
786	10.8333	16.8999	21.0166	22.7494	16.2496	22.4244	19.4995	27.2993	19.8245	19.1745
787	10.6166	16.6833	20.7999	22.7494	16.2496	22.0994	18.8495	27.6243	19.8245	19.1745
788	10.4	16.8999	21.0166	22.7494	16.5746	22.0994	19.4995	27.2993	19.8245	19.4995
789	10.6166	16.8999	21.0166	22.7494	16.5746	22.4244	19.8245	26.9743	19.8245	19.1745
790	10.4	16.6833	21.2333	22.4244	16.8996	22.0994	20.1495	27.2993	19.8245	19.4995
791	10.1833	16.4666	21.0166	22.4244	16.2496	22.4244	19.8245	26.9743	20.1495	19.4995
792	10.6166	16.4666	21.2333	22.4244	16.8996	22.0994	19.8245	27.2993	19.4995	19.4995
793	10.4	16.6833	21.0166	22.7494	16.8996	21.7745	19.8245	27.2993	19.8245	19.1745
794	10.6166	16.8999	21.0166	22.7494	16.8996	22.0994	20.4745	27.2993	19.1745	19.4995
795	10.6166	16.6833	21.0166	22.7494	16.5746	22.4244	20.1495	27.6243	19.8245	19.4995
796	11.05	16.4666	21.0166	22.4244	16.8996	21.7745	19.8245	27.2993	19.4995	19.4995
797	10.6166	16.6833	21.0166	22.7494	16.5746	21.7745	19.8245	26.9743	19.4995	19.4995
798	11.05	16.6833	21.2333	22.7494	16.5746	22.0994	20.7995	27.2993	19.4995	19.1745
799	10.6166	16.6833	21.0166	22.7494	16.2496	22.0994	20.1495	27.2993	19.4995	19.4995
800	10.6166	16.8999	21.0166	22.7494	16.5746	22.4244	20.7995	27.2993	19.8245	19.4995
801	10.4	16.4666	21.0166	22.4244	16.8996	22.0994	20.1495	27.6243	19.4995	19.4995
802	10.6166	16.6833	21.2333	22.4244	16.8996	22.4244	20.4745	27.6243	19.4995	19.4995
803	10.4	16.8999	21.0166	22.4244	16.8996	22.4244	20.1495	27.6243	19.8245	19.4995
804	10.6166	16.6833	21.2333	22.7494	16.5746	22.0994	20.4745	27.2993	19.8245	19.4995
805	10.8333	16.6833	21.0166	22.7494	16.5746	22.0994	19.8245	27.2993	19.4995	19.1745
806	10.6166	16.6833	21.2333	22.7494	16.8996	22.7494	20.4745	26.9743	19.1745	19.4995
807	10.4	16.6833	20.7999	22.7494	16.8996	22.0994	20.4745	27.2993	19.8245	19.1745
808	10.4	16.2499	20.7999	22.7494	16.8996	22.0994	20.1495	27.2993	20.1495	19.1745
809	10.6166	16.6833	20.7999	22.7494	16.8996	22.7494	20.1495	26.9743	19.8245	19.1745
810	10.6166	16.4666	20.7999	22.4244	16.8996	22.4244	20.4745	27.6243	19.8245	19.4995
811	10.6166	16.6833	21.0166	22.4244	16.8996	22.4244	20.1495	26.6493	19.8245	19.1745
812	10.4	16.4666	21.0166	22.4244	16.8996	22.4244	19.8245	26.9743	19.4995	18.8495
813	10.6166	16.4666	21.0166	22.4244	17.2246	22.4244	20.7995	26.9743	19.8245	18.8495
814	10.4	16.4666	21.2333	22.4244	16.2496	22.4244	19.8245	26.9743	19.4995	19.1745
815	10.6166	16.8999	21.2333	22.4244	16.8996	22.0994	19.8245	27.6243	19.4995	19.4995
816	10.1833	16.6833	21.0166	22.7494	16.8996	22.0994	20.1495	27.9493	19.4995	19.4995
817	10.1833	16.4666	21.0166	22.7494	16.8996	22.0994	20.1495	27.6243	20.1495	19.1745
818	10.4	16.6833	21.2333	22.4244	16.2496	22.4244	20.4745	27.2993	20.4745	19.1745
819	10.8333	16.4666	21.0166	22.4244	16.8996	22.4244	19.8245	27.2993	19.8245	19.1745
820	10.4	16.4666	21.0166	22.4244	16.5746	22.4244	20.1495	27.2993	19.4995	19.8245
821	9.74997	16.2499	21.0166	22.4244	16.8996	22.4244	20.4745	27.2993	19.4995	19.1745
822	10.4	16.4666	21.2333	22.4244	16.8996	22.4244	20.4745	27.2993	19.1745	19.4995
823	10.4	16.4666	21.0166	22.4244	17.2246	22.4244	20.4745	27.6243	19.8245	19.1745
824	10.6166	16.2499	21.2333	22.4244	16.8996	22.4244	19.8245	27.6243	19.8245	19.4995
825	10.6166	16.4666	21.2333	22.4244	16.5746	22.4244	19.8245	27.6243	19.8245	19.8245
826	10.4	16.2499	21.2333	22.7494	16.8996	22.4244	20.4745	27.2993	19.8245	19.1745
827	10.1833	16.4666	21.2333	22.4244	16.8996	22.7494	20.1495	26.9743	19.4995	19.1745
828	10.4	16.2499	21.0166	22.4244	17.2246	22.4244	20.1495	26.9743	19.4995	19.4995
829	10.4	16.4666	21.0166	22.7494	16.8996	22.4244	20.1495	26.9743	19.1745	19.4995
830	10.4	16.2499	21.2333	22.7494	16.8996	22.7494	20.4745	27.2993	19.1745	19.4995
831	10.1833	16.2499	21.0166	22.7494	16.8996	22.7494	19.8245	27.2993	19.4995	19.1745
832	10.4	16.6833	21.2333	22.7494	16.8996	22.7494	20.4745	27.6243	19.4995	19.4995
833	10.4	16.2499	21.2333	22.7494	16.8996	22.0994	20.7995	26.9743	19.1745	19.4995
834	10.1833	16.6833	21.2333	22.4244	16.8996	22.4244	20.1495	27.6243	19.1745	19.4995
835	10.4	16.6833	21.0166	22.4244	16.8996	22.4244	20.4745	27.2993	19.4995	19.4995
836	10.8333	16.8999	21.2333	22.4244	16.8996	22.4244	19.8245	27.6243	19.1745	19.4995
837	10.1833	16.8999	21.2333	22.4244	16.8996	22.4244	20.4745	27.2993	19.8245	19.1745
838	10.6166	16.8999	21.2333	22.4244	16.8996	22.4244	20.4745	27.9493	19.1745	19.4995
839	10.4	16.4666	21.4499	22.4244	16.8996	22.7494	20.4745	27.2993	19.8245	19.8245
840	10.4	16.6833	21.4499	22.4244	16.8996	22.7494	20.7995	26.6493	19.8245	19.8245
841	10.6166	16.6833	21.4499	22.4244	16.8996	22.7494	20.1495	27.2993	19.4995	20.1495
842	10.6166	16.4666	21.4499	22.4244	16.8996	22.4244	20.4745	27.2993	19.4995	19.8245
843	10.4	16.4666	21.4499	22.4244	16.8996	23.0744	20.1495	27.6243	19.4995	19.8245
844	10.6166	16.8999	21.2333	22.4244	16.8996	22.4244	20.4745	27.6243	19.4995	19.8245
845	9.96663	16.6833	21.2333	22.4244	16.8996	22.4244	20.4745	27.9493	19.1745	19.4995
846	10.6166	16.4666	21.4499	22.4244	16.8996	22.7494	20.4745	27.2993	19.4995	19.8245
847	10.6166	16.6833	21.6666	22.4244	16.8996	22.4244	20.1495	27.2993	19.4995	19.1745
848	10.4	16.8999	21.6666	22.7494	16.8996	22.7494	20.4745	26.9743	19.4995	19.4995
849	10.6166	16.6833	21.6666	22.4244	16.8996	22.7494	20.4745	27.2993	19.8245	19.4995
850	10.1833	16.6833	21.0166	22.4244	16.5746	22.7494	20.4745	27.6243	20.1495	19.4995
851	10.1833	16.8999	21.4499	22.4244	16.8996	22.7494	20.1495	27.6243	19.4995	19.4995
852	10.8333	16.8999	21.4499	22.7494	16.8996	22.0994	20.4745	27.2993	20.1495	19.4995
853	10.4	16.6833	21.2333	22.4244	16.8996	22.4244	20.1495	27.9493	19.4995	19.4995
854	10.6166	16.6833	21.6666	22.7494	16.8996	22.4244	20.1495	27.9493	19.4995	19.8245
855	10.6166	16.6833	21.4499	22.7494	16.5746	22.4244	20.4745	27.9493	19.4995	19.8245
856	10.4	16.6833	21.4499	22.7494	16.5746	22.4244	20.1495	27.9493	20.1495	19.4995
857	10.4	16.4666	21.2333	22.7494	16.8996	22.4244	20.1495	27.6243	19.8245	19.8245
858	10.6166	16.4666	21.4499	22.7494	16.8996	22.4244	20.4745	27.2993	19.1745	19.8245
859	10.6166	16.6833	21.2333	22.7494	16.8996	22.4244	20.4745	27.2993	19.8245	19.8245
860	10.6166	16.6833	21.4499	22.7494	16.5746	22.0994	20.1495	27.2993	20.1495	20.1495
861	10.4	16.6833	21.4499	22.4244	16.8996	22.4244	20.4745	27.9493	20.1495	19.8245
862	10.8333	16.6833	21.4499	22.4244	16.8996	22.0994	20.1495	27.9493	19.4995	19.8245
863	10.1833	16.6833	21.4499	22.7494	16.5746	22.7494	20.1495	27.9493	19.4995	20.1495
864	10.8333	16.6833	21.4499	22.7494	16.5746	22.7494	20.4745	27.6243	20.1495	19.8245
865	10.8333	16.8999	21.4499	22.7494	16.5746	23.0744	20.4745	27.9493	20.1495	19.4995
866	10.4	16.8999	21.4499	22.7494	16.5746	22.4244	20.4745	27.6243	20.1495	19.8245
867	10.4	16.4666	21.2333	22.4244	16.5746	22.4244	20.1495	27.9493	20.4745	19.8245
868	10.8333	16.8999	21.2333	22.4244	16.5746	22.0994	20.4745	27.6243	20.4745	19.4995
869	10.6166	16.6833	21.2333	22.4244	16.2496	22.7494	19.8245	27.9493	20.1495	19.8245
870	10.8333	16.4666	21.0166	22.7494	16.2496	22.4244	20.4745	27.9493	19.8245	19.4995
871	11.05	16.6833	21.0166	22.7494	16.8996	22.0994	20.4745	27.6243	20.1495	19.8245
872	10.4	16.6833	20.7999	22.7494	16.8996	22.0994	20.1495	27.6243	19.4995	20.1495
873	10.6166	16.6833	21.2333	22.7494	16.8996	22.0994	20.1495	27.6243	19.8245	20.1495
874	10.4	16.6833	21.0166	22.4244	16.5746	22.4244	20.4745	27.6243	19.8245	19.4995
875	10.8333	16.6833	21.2333	22.7494	16.5746	22.4244	20.4745	27.6243	19.4995	20.1495
876	10.6166	16.4666	21.0166	22.7494	16.5746	22.0994	20.1495	27.6243	19.8245	19.4995
877	10.4	16.6833	21.2333	22.7494	16.5746	22.0994	20.1495	26.9743	19.1745	19.8245
878	10.4	16.4666	21.0166	22.7494	16.5746	22.0994	20.1495	27.6243	20.1495	19.8245
879	10.6166	16.6833	21.0166	22.7494	16.2496	22.4244	19.8245	27.6243	19.4995	19.8245
880	10.6166	16.8999	20.7999	22.7494	16.2496	22.4244	20.4745	27.2993	19.4995	20.1495
881	11.05	16.4666	20.7999	22.7494	16.5746	22.0994	19.8245	26.9743	19.8245	19.4995
882	10.6166	16.4666	21.0166	22.4244	15.9246	22.7494	20.4745	26.9743	19.1745	19.1745
883	10.6166	16.6833	20.7999	22.7494	16.2496	22.0994	20.1495	27.9493	19.1745	19.1745
884	10.6166	16.2499	20.7999	22.7494	16.5746	22.0994	19.8245	27.2993	19.1745	19.1745
885	10.6166	16.6833	20.7999	22.4244	16.5746	22.4244	20.4745	27.9493	19.4995	19.4995
886	10.6166	16.4666	21.0166	22.7494	16.5746	22.4244	19.8245	27.9493	19.1745	19.8245
887	10.8333	16.6833	20.5833	22.7494	16.5746	22.0994	20.1495	27.6243	20.1495	19.4995
888	10.4	16.4666	20.7999	22.7494	16.2496	21.7745	19.8245	27.9493	19.8245	19.4995
889	10.6166	16.6833	20.7999	22.4244	16.5746	22.0994	20.4745	27.6243	19.4995	19.8245
890	10.4	16.4666	20.7999	22.0994	16.5746	22.0994	20.4745	27.6243	19.4995	19.4995
891	10.8333	16.4666	20.5833	22.4244	16.8996	22.0994	20.1495	27.2993	19.4995	19.4995
892	10.6166	16.6833	20.5833	22.4244	16.2496	22.0994	20.1495	27.2993	19.8245	19.8245
893	10.8333	16.2499	20.5833	22.7494	16.5746	22.7494	20.4745	27.2993	19.8245	20.1495
894	10.4	16.2499	20.7999	22.4244	16.2496	22.0994	20.4745	27.6243	19.4995	19.8245
895	10.8333	16.4666	20.7999	22.7494	16.2496	21.7745	20.4745	27.9493	19.1745	19.1745
896	10.6166	16.2499	21.0166	22.4244	16.8996	22.0994	20.7995	27.6243	19.8245	19.4995
897	10.8333	16.0333	20.7999	22.7494	16.8996	21.7745	20.4745	27.6243	19.4995	19.4995
898	10.4	16.4666	20.5833	22.4244	16.2496	22.0994	20.1495	27.6243	20.1495	19.8245
899	10.6166	16.8999	20.5833	22.4244	16.2496	22.0994	20.1495	27.2993	19.4995	19.8245
900	10.6166	16.6833	20.7999	22.7494	16.2496	22.4244	20.1495	27.6243	19.8245	19.8245
901	10.4	16.4666	21.2333	22.4244	16.2496	22.4244	19.8245	27.6243	20.1495	19.4995
902	10.8333	16.8999	21.2333	22.4244	16.5746	22.4244	20.4745	26.9743	19.8245	19.8245
903	10.6166	16.4666	20.5833	22.7494	16.2496	22.4244	20.4745	27.6243	20.1495	19.4995
904	10.6166	16.6833	21.0166	22.7494	16.2496	22.7494	19.8245	27.9493	19.1745	19.8245
905	10.4	16.8999	21.0166	22.7494	16.2496	21.7745	20.4745	26.9743	19.4995	19.8245
906	10.6166	16.6833	20.7999	22.7494	16.5746	22.0994	19.8245	27.6243	19.8245	19.4995
907	10.4	16.6833	21.0166	22.7494	16.2496	22.0994	20.1495	26.6493	20.1495	19.1745
908	10.6166	16.6833	21.0166	22.0994	16.2496	22.4244	20.1495	26.6493	19.1745	19.8245
909	10.8333	16.6833	20.7999	22.4244	16.5746	22.4244	19.8245	27.6243	19.4995	19.8245
910	10.8333	16.4666	20.7999	22.4244	16.2496	22.4244	19.8245	27.6243	19.8245	19.4995
911	10.6166	16.6833	21.2333	22.4244	16.2496	22.0994	19.8245	27.2993	20.1495	19.4995
912	10.6166	16.6833	21.2333	22.4244	16.2496	22.0994	20.4745	27.2993	20.1495	19.4995
913	10.6166	16.8999	21.2333	22.4244	16.5746	22.4244	19.8245	27.2993	19.8245	19.8245
914	10.6166	16.6833	21.0166	22.4244	16.2496	22.4244	19.8245	27.2993	20.1495	19.4995
915	10.6166	16.6833	20.7999	22.4244	16.2496	22.0994	20.1495	26.9743	19.4995	19.8245
916	10.6166	16.6833	20.7999	22.4244	16.2496	21.7745	20.4745	27.6243	19.8245	20.1495
917	10.4	16.6833	21.2333	22.7494	16.2496	22.0994	20.4745	27.6243	19.4995	19.1745
918	10.8333	16.8999	21.2333	22.4244	16.2496	22.0994	20.4745	27.9493	19.4995	19.8245
919	10.4	16.6833	21.0166	22.4244	16.5746	22.0994	19.4995	27.9493	19.4995	19.4995
920	10.6166	16.4666	20.7999	22.4244	16.5746	22.0994	19.8245	27.6243	19.8245	19.8245
921	10.1833	16.8999	21.2333	22.4244	16.2496	21.7745	19.4995	27.6243	19.8245	19.8245
922	10.4	16.4666	20.7999	22.4244	16.5746	21.7745	19.8245	27.6243	20.1495	19.8245
923	10.4	16.6833	21.2333	22.4244	16.2496	22.0994	19.1745	27.2993	20.1495	19.4995
924	10.4	16.4666	21.2333	22.4244	16.2496	21.7745	19.8245	26.9743	19.4995	19.4995
925	10.4	16.6833	21.0166	22.4244	16.5746	22.0994	19.8245	27.6243	20.1495	19.4995
926	10.6166	16.6833	21.0166	22.4244	16.5746	21.7745	19.8245	27.6243	20.1495	20.1495
927	10.4	16.2499	21.0166	22.4244	16.5746	21.4495	20.1495	27.2993	19.4995	19.8245
928	10.4	16.4666	21.2333	22.4244	16.2496	22.0994	19.4995	27.6243	19.8245	19.8245
929	10.4	16.4666	21.0166	22.4244	16.5746	22.0994	20.4745	27.6243	19.8245	19.4995
930	10.1833	16.0333	21.0166	22.4244	16.5746	22.0994	19.4995	27.6243	20.1495	19.8245
931	10.1833	16.2499	21.0166	22.0994	16.5746	21.7745	19.4995	27.2993	19.4995	20.1495
932	10.1833	16.4666	21.0166	22.4244	16.8996	21.7745	19.1745	27.2993	19.4995	19.8245
933	10.6166	16.4666	21.0166	22.4244	16.2496	22.4244	19.8245	27.2993	19.4995	20.1495
934	10.8333	16.6833	21.0166	22.4244	16.5746	22.4244	19.8245	27.9493	20.1495	19.8245
935	10.6166	16.2499	20.7999	22.4244	16.5746	22.0994	19.4995	27.2993	20.4745	20.1495
936	10.1833	16.6833	21.0166	22.0994	16.5746	22.0994	19.4995	28.2743	19.4995	19.8245
937	10.4	16.4666	21.0166	22.4244	16.5746	22.0994	19.1745	27.2993	20.1495	19.8245
938	10.6166	16.4666	21.0166	22.4244	16.2496	22.4244	19.8245	27.2993	20.1495	19.8245
939	10.6166	16.2499	20.7999	22.7494	16.2496	22.4244	19.4995	27.2993	20.1495	19.4995
940	10.4	16.2499	20.7999	22.4244	16.5746	22.0994	19.8245	27.6243	19.8245	19.8245
941	10.4	16.4666	20.7999	22.7494	16.5746	22.4244	20.1495	27.9493	19.4995	19.8245
942	10.4	16.4666	21.0166	22.7494	16.5746	22.4244	19.8245	27.9493	19.8245	19.8245
943	10.4	16.4666	21.0166	22.7494	16.5746	22.4244	19.4995	27.6243	19.8245	19.4995
944	10.6166	16.6833	21.0166	23.0744	16.2496	22.4244	19.8245	28.2743	19.8245	19.8245
945	10.8333	16.4666	21.0166	22.7494	16.5746	22.4244	19.8245	27.6243	19.8245	19.4995
946	10.4	16.4666	20.7999	22.7494	15.9246	22.4244	19.8245	27.2993	20.1495	19.4995
947	10.6166	16.6833	21.0166	23.0744	16.2496	22.4244	19.4995	27.6243	19.8245	19.4995
948	10.1833	16.6833	21.0166	23.0744	16.2496	22.7494	19.8245	28.2743	19.4995	19.4995
949	10.8333	16.4666	21.0166	22.7494	15.9246	22.4244	19.8245	26.9743	20.1495	19.4995
950	10.4	16.2499	21.2333	23.0744	16.2496	22.4244	19.8245	27.2993	19.4995	19.4995
951	10.6166	16.2499	21.0166	23.0744	16.2496	22.4244	19.8245	26.9743	19.8245	19.4995
952	10.4	16.4666	21.0166	22.7494	16.5746	22.4244	19.8245	27.9493	19.4995	19.8245
953	10.6166	16.4666	21.0166	22.7494	16.5746	22.4244	19.4995	27.6243	19.4995	19.1745
954	10.1833	16.2499	21.0166	23.0744	16.2496	22.4244	19.8245	27.6243	19.4995	19.4995
955	10.1833	16.4666	21.0166	23.0744	16.2496	22.4244	20.1495	27.2993	20.1495	19.4995
956	10.6166	16.0333	20.7999	23.0744	16.2496	22.0994	19.4995	27.6243	19.1745	19.4995
957	10.1833	16.4666	20.7999	22.7494	16.2496	22.4244	20.1495	27.6243	19.8245	19.4995
958	10.4	16.2499	20.7999	23.0744	16.2496	22.4244	20.1495	26.9743	19.8245	19.8245
959	10.6166	16.2499	21.2333	23.0744	15.5996	23.0744	19.8245	26.9743	20.1495	19.8245
960	11.05	16.6833	21.0166	22.7494	16.2496	23.0744	19.4995	27.6243	19.8245	19.8245
961	10.1833	16.4666	21.0166	23.0744	16.2496	22.7494	19.8245	27.2993	20.1495	19.1745
962	10.4	16.4666	20.7999	23.0744	15.5996	22.4244	19.1745	27.6243	19.8245	19.4995
963	10.1833	16.4666	20.7999	23.0744	15.2746	22.4244	19.4995	26.9743	20.1495	19.4995
964	10.4	16.4666	21.0166	23.0744	15.9246	22.4244	19.8245	27.2993	20.1495	19.4995
965	10.6166	16.2499	21.2333	22.7494	15.9246	22.4244	19.1745	27.9493	19.4995	20.1495
966	10.6166	16.4666	21.2333	22.7494	16.2496	22.4244	20.1495	27.2993	19.8245	19.4995
967	10.4	16.2499	21.0166	23.0744	15.9246	22.4244	19.8245	27.6243	19.8245	19.8245
968	10.8333	16.6833	21.0166	22.7494	16.2496	22.4244	19.8245	27.2993	19.8245	19.4995
969	10.6166	16.4666	21.0166	23.0744	16.2496	22.4244	19.8245	27.9493	19.4995	19.8245
970	10.6166	16.2499	21.0166	23.0744	16.5746	22.4244	20.1495	26.9743	20.1495	19.8245
971	10.6166	16.0333	21.0166	22.7494	15.9246	22.7494	19.8245	27.9493	20.4745	19.4995
972	10.4	16.2499	21.2333	23.0744	15.5996	22.7494	19.4995	27.9493	20.1495	19.8245
973	10.6166	16.2499	21.2333	22.7494	15.5996	22.7494	19.8245	27.6243	19.8245	19.8245
974	10.6166	16.4666	21.2333	22.7494	15.9246	22.7494	19.4995	27.6243	20.1495	19.8245
975	10.6166	16.4666	21.2333	23.0744	15.9246	22.4244	19.4995	26.9743	20.1495	19.8245
976	10.4	16.4666	21.2333	22.7494	15.9246	22.4244	19.8245	27.9493	19.8245	20.1495
977	10.6166	16.4666	21.0166	23.0744	15.9246	22.7494	19.8245	27.9493	20.1495	19.8245
978	10.4	16.2499	20.7999	23.0744	16.2496	22.7494	19.8245	27.6243	19.8245	19.8245
979	10.1833	16.4666	21.0166	23.0744	16.5746	22.7494	19.8245	27.6243	20.4745	19.4995
980	10.1833	16.4666	21.2333	22.7494	15.9246	22.4244	19.4995	27.2993	20.1495	19.8245
981	10.4	16.4666	21.0166	22.7494	15.9246	22.7494	20.1495	27.6243	20.1495	19.8245
982	10.8333	16.2499	21.0166	23.0744	15.9246	22.4244	20.1495	28.2743	20.1495	19.8245
983	10.4	16.6833	21.2333	23.0744	15.9246	22.0994	19.8245	27.9493	20.1495	19.8245
984	10.8333	16.4666	20.7999	22.7494	15.5996	22.4244	19.8245	27.9493	20.7995	19.8245
985	9.96663	16.2499	21.0166	22.7494	15.9246	22.7494	19.4995	27.2993	20.1495	19.4995
986	11.05	16.8999	21.2333	23.0744	15.5996	22.4244	20.4745	27.2993	20.1495	19.4995
987	10.1833	16.6833	21.0166	23.0744	15.9246	22.4244	19.8245	27.9493	20.7995	19.4995
988	10.6166	16.6833	21.0166	22.7494	15.5996	22.4244	19.8245	27.6243	20.7995	19.8245
989	10.6166	16.4666	21.0166	23.0744	15.9246	22.0994	19.4995	27.6243	20.4745	19.4995
990	10.1833	16.8999	21.0166	23.0744	15.2746	22.7494	19.4995	27.6243	21.1245	20.4745
991	9.96663	16.4666	21.0166	23.0744	15.5996	22.4244	20.1495	27.9493	20.7995	19.8245
992	10.1833	16.6833	21.0166	22.7494	15.9246	22.7494	20.1495	27.2993	20.4745	20.1495
993	10.4	16.2499	21.2333	23.0744	15.5996	22.4244	20.1495	27.6243	19.8245	20.1495
994	10.1833	16.6833	21.2333	22.7494	15.9246	22.7494	19.8245	27.9493	20.7995	19.8245
995	10.4	16.2499	21.2333	23.0744	15.9246	22.7494	19.8245	27.9493	21.4495	19.8245
996	10.4	16.2499	21.2333	23.0744	15.9246	22.7494	20.1495	28.2743	19.8245	19.8245
997	10.1833	16.6833	21.0166	22.7494	15.9246	22.7494	19.8245	27.6243	20.4745	19.8245
998	10.4	16.6833	21.2333	23.0744	15.9246	22.7494	18.8495	27.2993	20.1495	19.8245
999	9.96663	16.8999	21.2333	22.7494	16.2496	23.0744	19.4995	27.6243	20.4745	20.1495
1000	10.1833	16.4666	21.2333	22.7494	15.9246	22.7494	19.8245	27.2993	20.1495	20.4745
1001	10.4	16.8999	21.0166	22.7494	16.2496	22.4244	19.8245	27.6243	20.4745	20.1495
1002	10.6166	16.6833	21.0166	23.0744	16.2496	22.7494	19.8245	27.6243	20.1495	19.8245
1003	9.96663	16.8999	21.0166	23.0744	15.9246	22.7494	20.4745	27.6243	20.4745	19.4995
1004	10.6166	17.1166	21.2333	23.0744	15.9246	22.7494	19.8245	27.9493	20.1495	19.4995
1005	10.4	16.8999	21.2333	22.7494	15.9246	22.7494	19.8245	27.6243	20.1495	19.8245
1006	10.1833	16.8999	21.0166	22.7494	15.9246	22.0994	19.4995	27.9493	20.1495	19.8245
1007	10.4	17.1166	21.0166	22.7494	15.9246	22.7494	19.8245	27.2993	20.1495	19.8245
1008	10.4	16.8999	21.0166	23.0744	15.9246	22.4244	19.8245	27.6243	20.1495	19.8245
1009	10.8333	16.4666	21.0166	22.7494	16.2496	22.4244	19.4995	27.9493	20.1495	19.8245
1010	10.1833	17.1166	20.7999	23.0744	15.9246	22.7494	18.8495	27.9493	20.4745	20.1495
1011	10.4	16.6833	20.7999	22.7494	16.2496	22.0994	19.8245	27.9493	21.4495	19.8245
1012	10.6166	16.8999	21.2333	23.0744	16.5746	22.4244	19.8245	27.6243	20.4745	20.1495
1013	10.4	16.6833	20.7999	23.0744	16.2496	22.4244	19.1745	27.6243	20.4745	19.8245
1014	10.1833	16.8999	21.0166	22.7494	16.2496	22.0994	19.4995	27.6243	21.1245	19.8245
1015	10.1833	16.8999	20.7999	23.0744	15.9246	22.4244	19.4995	27.9493	20.4745	19.8245
1016	10.6166	17.1166	21.0166	22.7494	16.2496	22.4244	20.1495	26.9743	20.7995	19.8245
1017	10.6166	16.6833	20.7999	22.7494	16.2496	22.0994	19.4995	27.6243	20.1495	19.8245
1018	10.4	16.6833	21.2333	22.7494	16.2496	22.4244	19.4995	27.6243	21.1245	19.8245
1019	10.6166	16.4666	21.0166	22.7494	16.2496	22.4244	19.4995	27.9493	21.1245	19.4995
1020	10.1833	16.6833	20.7999	22.7494	16.2496	22.0994	19.8245	27.6243	20.4745	19.8245
1021	10.6166	16.4666	21.0166	22.7494	16.2496	22.0994	20.1495	27.6243	20.7995	19.4995
1022	10.4	16.6833	20.7999	22.7494	15.9246	22.7494	19.8245	27.9493	20.4745	20.4745
1023	10.4	16.6833	21.0166	23.0744	16.5746	22.0994	20.1495	27.9493	21.1245	19.4995
1024	10.1833	16.4666	21.0166	23.0744	16.5746	21.7745	19.8245	27.9493	20.4745	19.8245
1025	10.4	16.4666	20.5833	23.0744	16.5746	22.0994	19.8245	27.9493	20.7995	19.8245
1026	10.1833	16.4666	21.0166	22.7494	16.5746	22.0994	19.8245	27.2993	20.4745	19.8245
1027	10.1833	16.4666	20.7999	22.7494	16.5746	22.0994	19.4995	27.6243	20.4745	20.1495
1028	11.05	16.4666	21.0166	22.7494	16.2496	22.4244	19.4995	27.2993	20.4745	19.8245
1029	10.4	16.6833	20.7999	23.0744	16.2496	22.0994	19.8245	27.6243	20.4745	19.8245
1030	10.6166	16.4666	20.7999	22.7494	16.5746	22.0994	19.8245	27.9493	20.7995	19.8245
1031	10.4	16.6833	21.0166	23.0744	16.5746	22.0994	20.1495	27.6243	20.7995	19.8245
1032	10.1833	16.4666	21.0166	22.7494	16.5746	21.7745	19.8245	27.6243	21.1245	19.8245
1033	10.4	16.6833	20.7999	22.7494	16.5746	22.0994	19.8245	27.6243	20.4745	20.1495
1034	10.6166	16.6833	21.0166	23.0744	16.5746	22.0994	19.4995	27.9493	20.1495	20.1495
1035	9.96663	16.6833	20.7999	23.0744	16.5746	21.7745	20.1495	27.6243	20.7995	19.4995
1036	10.1833	16.4666	20.7999	22.7494	16.5746	22.0994	19.8245	26.9743	20.4745	19.8245
1037	10.6166	16.8999	20.7999	22.7494	16.5746	22.0994	20.1495	27.6243	20.1495	20.1495
1038	10.1833	16.6833	21.0166	23.0744	16.5746	22.0994	19.1745	27.6243	20.4745	20.1495
1039	10.6166	16.4666	20.7999	22.7494	16.5746	22.0994	19.8245	27.9493	20.4745	19.8245
1040	10.1833	16.4666	21.2333	23.0744	16.2496	22.4244	19.4995	27.9493	20.4745	20.1495
1041	10.6166	16.4666	21.0166	22.7494	16.2496	22.0994	19.8245	27.9493	20.4745	20.1495
1042	10.6166	16.8999	21.0166	23.0744	16.5746	22.0994	19.4995	27.9493	19.8245	19.8245
1043	10.8333	16.4666	20.7999	23.0744	16.5746	22.0994	20.1495	27.9493	20.4745	20.1495
1044	10.8333	16.4666	20.7999	22.7494	16.5746	22.0994	19.4995	27.2993	19.8245	19.8245
1045	10.8333	16.8999	20.7999	22.7494	16.5746	22.4244	19.4995	27.6243	20.7995	19.8245
1046	10.4	16.4666	20.7999	23.0744	16.5746	22.4244	20.1495	27.9493	20.1495	19.8245
1047	10.8333	16.8999	20.7999	22.7494	16.5746	22.0994	19.4995	27.9493	20.4745	19.8245
1048	10.8333	16.6833	20.7999	22.7494	16.5746	22.4244	19.8245	27.6243	19.8245	19.8245
1049	10.8333	16.8999	20.7999	22.7494	16.2496	22.0994	19.4995	27.6243	20.1495	19.8245
1050	10.4	16.6833	21.0166	23.0744	15.9246	21.7745	19.4995	27.2993	20.1495	19.8245
1051	10.6166	16.6833	20.7999	22.7494	16.2496	22.7494	19.8245	27.9493	20.4745	20.1495
1052	10.6166	16.6833	20.5833	23.0744	15.9246	22.0994	19.4995	27.2993	20.4745	19.8245
1053	10.6166	17.1166	21.0166	22.7494	16.2496	21.7745	19.8245	27.6243	20.1495	20.1495
1054	10.1833	16.8999	21.0166	22.7494	16.2496	22.4244	19.8245	27.6243	20.1495	20.1495
1055	10.6166	16.4666	20.7999	22.7494	15.9246	21.7745	19.8245	27.6243	20.7995	20.1495
1056	10.8333	16.6833	21.0166	22.7494	16.2496	21.7745	19.8245	27.6243	20.1495	20.4745
1057	10.4	16.8999	20.7999	22.7494	16.2496	22.4244	19.8245	27.9493	20.4745	20.1495
1058	10.6166	16.4666	20.7999	22.7494	15.9246	22.0994	19.8245	27.6243	20.7995	20.1495
1059	10.8333	16.4666	20.5833	22.7494	16.5746	21.7745	19.8245	27.6243	20.1495	19.8245
1060	10.4	16.4666	20.5833	22.7494	16.5746	22.0994	19.8245	27.6243	20.4745	19.8245
1061	10.4	16.4666	20.7999	23.0744	16.5746	22.0994	19.8245	27.6243	20.4745	20.1495
1062	10.6166	16.4666	20.3666	22.7494	16.5746	21.7745	19.8245	27.6243	20.4745	20.1495
1063	9.96663	16.4666	21.0166	22.7494	16.5746	22.0994	20.1495	28.2743	21.4495	19.8245
1064	10.8333	16.4666	20.7999	23.0744	16.5746	22.0994	19.8245	27.9493	20.7995	20.1495
1065	10.4	16.6833	21.0166	23.0744	16.5746	22.0994	19.4995	27.9493	20.4745	19.8245
1066	10.8333	17.1166	21.0166	23.0744	16.2496	22.0994	19.4995	28.2743	20.7995	19.8245
1067	10.8333	16.2499	20.7999	23.0744	16.2496	22.4244	19.8245	27.6243	20.7995	19.8245
1068	10.6166	16.6833	20.5833	23.0744	16.2496	22.0994	20.4745	27.6243	20.4745	19.8245
1069	10.8333	16.6833	20.3666	23.0744	16.5746	21.7745	19.8245	27.2993	20.4745	19.8245
1070	10.6166	16.4666	20.7999	22.7494	16.2496	22.4244	19.8245	26.9743	20.7995	19.8245
1071	11.05	16.4666	20.5833	23.0744	16.2496	21.7745	19.4995	27.9493	20.4745	19.8245
1072	10.6166	16.6833	20.7999	22.7494	16.5746	22.4244	19.8245	27.2993	20.4745	19.8245
1073	10.6166	17.1166	20.7999	22.7494	16.2496	22.0994	19.4995	27.9493	20.7995	19.8245
1074	10.6166	16.4666	20.5833	22.7494	16.5746	21.7745	20.4745	27.9493	21.4495	19.8245
1075	10.6166	16.4666	20.5833	22.7494	16.5746	22.0994	19.8245	27.2993	20.1495	19.8245
1076	10.1833	16.8999	20.7999	22.7494	16.2496	21.7745	20.1495	27.2993	20.7995	19.8245
1077	10.6166	16.8999	20.5833	22.7494	16.2496	22.0994	19.4995	27.2993	20.1495	19.8245
1078	10.6166	17.1166	21.0166	22.7494	16.5746	21.7745	19.8245	27.6243	20.7995	19.4995
1079	10.6166	16.6833	20.7999	22.7494	16.5746	22.4244	20.1495	28.2743	20.7995	20.1495
1080	10.8333	16.6833	20.5833	23.0744	16.5746	21.7745	20.4745	27.6243	20.1495	19.8245
1081	10.1833	16.6833	20.7999	22.7494	16.5746	21.7745	20.1495	27.6243	20.7995	19.8245
1082	10.4	16.6833	21.0166	23.0744	16.8996	21.4495	20.1495	27.6243	20.7995	20.1495
1083	10.1833	16.6833	20.7999	22.7494	16.2496	21.7745	19.8245	27.9493	20.7995	19.8245
1084	10.6166	16.6833	21.2333	23.0744	16.8996	22.0994	20.1495	28.2743	21.4495	20.1495
1085	10.4	16.6833	20.7999	23.0744	16.5746	22.0994	19.8245	27.9493	20.4745	19.8245
1086	10.4	16.2499	20.7999	22.7494	16.8996	21.4495	20.1495	27.9493	20.7995	19.8245
1087	10.6166	16.6833	20.5833	22.7494	16.5746	21.7745	20.4745	27.6243	20.7995	20.1495
1088	10.6166	16.6833	20.7999	23.0744	16.5746	21.7745	19.8245	27.9493	20.4745	19.8245
1089	10.6166	16.8999	21.0166	23.0744	15.9246	21.1245	20.1495	26.9743	20.7995	20.1495
1090	11.05	16.6833	21.0166	22.7494	15.5996	21.7745	20.1495	27.6243	20.1495	20.1495
1091	10.8333	16.4666	20.7999	23.0744	15.9246	21.7745	20.4745	28.2743	19.8245	20.4745
1092	10.8333	16.6833	20.7999	22.7494	15.9246	21.4495	20.1495	27.6243	21.1245	20.1495
1093	10.8333	16.6833	21.0166	23.0744	16.2496	22.0994	19.8245	27.9493	20.7995	19.8245
1094	10.8333	16.6833	21.0166	22.7494	16.5746	22.0994	20.1495	27.9493	20.4745	19.8245
1095	10.6166	16.6833	21.0166	22.7494	16.5746	22.0994	20.1495	27.9493	21.1245	19.8245
1096	10.4	16.6833	21.0166	23.0744	16.5746	21.7745	19.4995	27.9493	20.4745	20.1495
1097	10.6166	16.8999	21.0166	22.7494	15.9246	21.7745	20.1495	27.6243	20.7995	19.8245
1098	10.8333	16.6833	21.0166	22.7494	15.5996	21.4495	19.8245	27.9493	20.4745	19.8245
1099	10.6166	16.4666	21.0166	22.7494	16.5746	22.4244	19.8245	27.6243	20.4745	20.1495
1100	10.6166	16.2499	20.7999	22.7494	15.9246	22.0994	20.4745	27.9493	20.4745	20.1495
1101	10.6166	16.4666	20.7999	22.7494	15.9246	22.0994	19.8245	27.6243	20.7995	19.8245
1102	10.6166	16.6833	21.0166	22.7494	16.2496	22.0994	20.1495	27.6243	21.1245	20.1495
1103	10.8333	16.2499	20.7999	22.7494	15.9246	22.4244	19.8245	27.6243	20.1495	19.8245
1104	10.4	16.4666	20.7999	23.0744	15.9246	22.0994	20.1495	27.9493	20.4745	20.1495
1105	10.8333	16.8999	20.3666	22.7494	16.2496	22.0994	19.8245	27.6243	20.7995	20.1495
1106	11.05	16.6833	20.7999	23.0744	16.2496	22.0994	19.8245	27.9493	21.1245	20.1495
1107	10.8333	16.6833	20.7999	23.0744	16.5746	21.7745	20.1495	27.9493	21.1245	20.1495
1108	11.05	16.2499	20.5833	22.7494	16.2496	22.4244	20.1495	27.9493	20.1495	19.8245
1109	10.6166	16.4666	20.7999	22.7494	16.2496	22.4244	19.8245	28.2743	20.4745	20.1495
1110	10.8333	16.6833	21.0166	23.0744	16.5746	21.7745	19.8245	27.9493	21.1245	19.8245
1111	10.6166	16.4666	20.7999	23.0744	16.2496	22.0994	20.1495	27.6243	20.7995	20.1495
1112	10.6166	16.2499	20.7999	22.7494	16.2496	21.7745	20.1495	27.9493	20.7995	19.8245
1113	10.1833	16.6833	20.7999	22.7494	16.2496	21.7745	19.8245	28.2743	20.4745	19.8245
1114	10.8333	16.6833	21.0166	23.0744	16.5746	21.7745	20.1495	28.2743	20.4745	19.8245
1115	10.6166	16.6833	20.7999	22.7494	16.2496	22.4244	20.1495	28.2743	20.7995	20.1495
1116	10.6166	16.6833	21.0166	22.7494	15.9246	22.0994	20.4745	27.2993	20.4745	20.1495
1117	10.6166	16.0333	21.0166	23.0744	16.2496	22.0994	20.1495	28.2743	20.7995	20.4745
1118	10.8333	16.4666	21.0166	23.0744	15.9246	21.7745	20.1495	27.6243	20.7995	20.1495
1119	10.6166	16.4666	21.0166	22.7494	15.9246	22.0994	20.1495	28.2743	20.7995	20.1495
1120	10.6166	16.4666	20.7999	22.7494	15.9246	21.7745	20.1495	27.6243	20.1495	20.1495
1121	10.6166	16.6833	21.0166	23.0744	15.9246	21.7745	19.8245	28.2743	20.7995	20.1495
1122	10.8333	16.2499	20.7999	22.7494	15.5996	22.4244	20.1495	27.9493	20.7995	19.8245
1123	10.4	16.6833	20.7999	22.7494	16.2496	21.7745	19.8245	27.6243	21.4495	19.8245
1124	10.8333	16.8999	21.0166	23.0744	16.2496	22.0994	20.1495	28.2743	20.1495	19.8245
1125	10.6166	16.4666	21.0166	23.0744	16.2496	22.0994	19.8245	27.6243	20.7995	19.8245
1126	10.8333	16.4666	21.0166	23.0744	16.2496	22.0994	20.1495	27.6243	21.4495	19.8245
1127	10.8333	16.8999	21.0166	22.7494	16.2496	22.0994	20.1495	28.2743	20.7995	20.1495
1128	10.4	16.4666	21.2333	22.7494	16.5746	22.0994	20.1495	28.2743	21.1245	20.4745
1129	10.8333	16.6833	21.2333	22.7494	16.2496	22.4244	19.8245	27.9493	21.1245	19.8245
1130	11.05	16.4666	21.0166	22.7494	16.2496	21.7745	19.8245	28.2743	20.7995	19.8245
1131	10.6166	16.6833	21.0166	23.0744	16.2496	22.0994	20.1495	27.9493	20.7995	19.8245
1132	10.8333	16.2499	20.7999	22.7494	16.2496	21.7745	19.8245	28.2743	20.4745	19.8245
1133	10.8333	16.2499	21.0166	22.7494	16.5746	22.0994	19.8245	27.9493	20.7995	19.8245
1134	10.6166	16.4666	21.0166	23.0744	16.2496	21.7745	20.1495	28.5993	21.1245	19.8245
1135	10.6166	16.6833	21.0166	23.0744	16.2496	21.7745	20.1495	27.9493	20.7995	20.1495
1136	10.8333	16.2499	20.7999	22.7494	16.2496	22.0994	20.1495	28.2743	20.7995	19.8245
1137	10.6166	16.4666	21.0166	23.0744	16.2496	22.0994	20.1495	27.9493	20.4745	19.8245
1138	10.8333	16.2499	21.2333	23.0744	15.9246	21.7745	20.4745	27.9493	20.4745	19.8245
1139	11.05	16.0333	21.0166	22.7494	16.5746	22.4244	20.4745	27.9493	21.1245	19.4995
1140	10.8333	16.4666	21.2333	22.7494	16.2496	22.0994	20.4745	27.6243	20.4745	19.8245
1141	10.6166	16.4666	21.2333	22.7494	15.9246	22.0994	19.8245	27.2993	20.7995	20.1495
1142	10.8333	16.4666	20.7999	22.7494	16.5746	22.0994	20.4745	28.2743	20.1495	19.8245
1143	10.8333	16.4666	21.0166	22.7494	16.2496	22.4244	20.4745	27.9493	20.7995	19.8245
1144	10.8333	16.2499	20.5833	22.7494	15.9246	22.0994	20.4745	28.5993	20.7995	19.8245
1145	10.6166	16.4666	21.4499	22.7494	16.2496	21.4495	20.1495	27.2993	20.7995	20.1495
1146	10.4	16.4666	21.2333	22.7494	16.5746	22.0994	20.1495	27.2993	20.4745	20.1495
1147	10.6166	16.4666	21.2333	22.7494	16.5746	22.0994	20.1495	27.2993	20.4745	20.1495
1148	10.8333	16.4666	21.0166	22.7494	16.5746	21.7745	20.1495	27.9493	21.4495	20.1495
1149	10.4	16.6833	21.0166	23.0744	15.9246	22.0994	19.8245	27.2993	21.1245	19.8245
1150	10.4	16.6833	21.4499	22.7494	16.5746	22.7494	20.4745	27.9493	21.1245	19.8245
1151	10.4	16.2499	21.2333	23.0744	16.5746	22.0994	21.1245	27.2993	20.7995	19.8245
1152	10.6166	16.4666	21.2333	22.7494	15.9246	22.0994	20.4745	27.9493	21.7745	20.1495
1153	11.05	16.4666	21.2333	22.7494	15.9246	22.0994	20.4745	27.6243	20.7995	20.1495
1154	10.8333	16.8999	20.5833	22.7494	16.2496	22.0994	19.4995	27.9493	20.7995	20.1495
1155	10.6166	15.8166	21.0166	23.0744	16.5746	22.0994	20.4745	27.6243	20.7995	20.1495
1156	10.8333	16.2499	21.0166	23.0744	16.2496	22.0994	20.4745	27.2993	21.1245	19.8245
1157	11.05	16.6833	20.7999	22.7494	15.9246	22.0994	19.8245	27.6243	20.7995	19.8245
1158	11.05	16.2499	21.0166	23.0744	15.9246	21.7745	20.1495	28.2743	20.1495	20.1495
1159	10.6166	16.4666	20.3666	22.7494	16.2496	22.4244	19.8245	27.6243	20.7995	20.1495
1160	10.4	16.4666	21.0166	23.0744	15.9246	21.4495	19.8245	27.6243	20.4745	20.1495
1161	11.05	16.4666	21.2333	22.7494	16.5746	22.0994	20.1495	27.6243	20.7995	19.8245
1162	10.4	16.4666	21.0166	23.0744	16.5746	22.4244	19.8245	27.9493	20.4745	19.8245
1163	10.8333	16.4666	21.4499	22.4244	16.2496	22.4244	20.1495	27.2993	20.4745	19.8245
1164	10.8333	16.6833	20.7999	23.0744	16.2496	22.0994	20.1495	27.9493	20.4745	20.1495
1165	11.05	16.4666	20.7999	22.7494	16.2496	22.4244	20.1495	28.2743	21.1245	20.4745
1166	10.8333	16.4666	21.0166	22.7494	16.2496	21.7745	20.4745	27.9493	20.7995	19.8245
1167	11.05	16.2499	21.2333	22.7494	16.5746	22.0994	20.1495	27.6243	20.7995	20.1495
1168	10.8333	16.4666	20.7999	22.7494	16.5746	22.4244	20.4745	27.6243	21.4495	20.1495
1169	10.8333	16.2499	21.0166	23.0744	16.2496	22.0994	20.1495	27.9493	20.7995	20.1495
1170	10.8333	16.2499	21.0166	22.7494	16.5746	22.0994	20.1495	27.9493	20.7995	19.8245
1171	10.4	16.4666	21.0166	22.7494	16.5746	22.4244	20.1495	27.6243	21.1245	20.1495
1172	11.05	16.4666	21.4499	22.4244	16.5746	22.7494	20.1495	26.9743	20.7995	19.8245
1173	10.8333	16.6833	20.3666	22.7494	16.2496	22.4244	20.1495	27.6243	21.1245	20.1495
1174	10.8333	16.4666	21.2333	22.7494	16.5746	22.0994	20.1495	27.9493	20.4745	20.1495
1175	10.8333	16.4666	21.2333	23.0744	16.5746	22.7494	20.1495	27.6243	20.4745	20.1495
1176	11.05	16.2499	20.5833	22.7494	16.2496	22.4244	19.8245	27.9493	20.7995	20.1495
1177	11.05	16.4666	21.0166	22.7494	16.2496	22.0994	19.8245	27.6243	20.7995	20.1495
1178	10.8333	16.4666	21.0166	23.0744	16.2496	22.7494	20.7995	27.9493	20.7995	20.4745
1179	10.8333	16.6833	20.3666	22.7494	16.2496	22.7494	20.4745	27.9493	21.1245	20.1495
1180	10.8333	16.4666	21.0166	22.4244	16.2496	22.4244	19.8245	27.6243	21.1245	20.1495
1181	10.6166	16.2499	20.7999	22.7494	16.2496	22.0994	20.4745	27.9493	20.7995	19.8245
1182	10.4	16.4666	20.5833	22.7494	16.2496	22.4244	20.1495	27.6243	20.7995	19.8245
1183	10.8333	16.2499	20.7999	23.0744	16.2496	22.4244	20.1495	27.6243	20.7995	20.1495
1184	11.05	16.2499	21.0166	22.7494	15.9246	22.0994	20.1495	27.6243	20.7995	19.8245
1185	10.8333	16.4666	21.2333	23.0744	15.9246	22.7494	20.4745	27.9493	20.4745	19.8245
1186	11.05	16.4666	21.0166	22.4244	16.2496	22.4244	20.4745	27.9493	21.4495	20.1495
1187	11.05	16.6833	21.2333	22.7494	16.2496	22.7494	20.1495	27.9493	20.4745	20.1495
1188	11.05	16.2499	21.0166	22.7494	15.9246	22.4244	19.8245	28.2743	20.7995	20.1495
1189	10.8333	16.4666	21.0166	22.7494	15.9246	22.0994	20.4745	28.2743	20.7995	20.4745
1190	10.6166	16.4666	20.7999	22.7494	16.2496	22.4244	19.8245	27.9493	20.7995	20.1495
1191	10.6166	16.2499	21.0166	22.7494	16.2496	22.4244	20.4745	26.9743	21.1245	20.4745
1192	10.8333	16.2499	20.7999	22.7494	16.2496	22.7494	19.8245	27.9493	20.4745	19.8245
1193	10.6166	16.0333	21.0166	22.7494	15.9246	22.4244	20.1495	27.9493	20.7995	20.1495
1194	10.8333	16.2499	21.2333	22.7494	16.2496	22.4244	20.1495	27.2993	20.7995	19.8245
1195	11.05	16.4666	21.0166	23.0744	16.2496	21.7745	20.1495	27.6243	21.1245	19.8245
1196	10.8333	16.0333	21.2333	22.7494	15.9246	22.4244	20.4745	27.6243	20.1495	19.8245
1197	10.1833	16.2499	21.0166	22.4244	16.2496	22.4244	20.1495	27.2993	20.4745	20.4745
1198	10.8333	16.4666	21.0166	22.7494	15.9246	22.0994	19.8245	27.6243	20.7995	20.4745
1199	10.4	16.2499	21.0166	22.7494	15.9246	22.0994	19.8245	27.6243	21.1245	20.1495
1200	10.8333	16.6833	21.2333	22.7494	16.2496	22.4244	20.4745	27.2993	20.7995	19.8245
1201	11.05	16.2499	21.0166	22.4244	16.2496	22.4244	20.4745	27.9493	21.1245	20.1495
1202	10.8333	16.4666	21.0166	23.0744	16.2496	22.4244	19.8245	27.6243	21.1245	19.8245
1203	11.05	16.4666	21.2333	22.4244	16.2496	22.4244	20.1495	27.2993	20.7995	20.1495
1204	11.05	16.2499	21.4499	22.7494	16.2496	22.4244	20.1495	27.6243	20.7995	20.1495
1205	10.8333	16.4666	21.2333	23.0744	16.5746	22.0994	20.1495	27.6243	21.1245	20.4745
1206	10.6166	16.4666	21.2333	23.0744	16.5746	22.0994	20.4745	27.2993	21.1245	19.8245
1207	11.05	16.2499	21.2333	22.7494	15.9246	22.4244	20.4745	27.6243	20.7995	20.1495
1208	11.05	16.2499	21.0166	22.7494	16.5746	22.4244	20.1495	27.6243	21.7745	20.1495
1209	11.05	16.4666	21.0166	23.0744	16.2496	22.7494	20.7995	27.6243	20.7995	19.8245
1210	11.05	16.2499	21.0166	22.7494	16.2496	22.4244	19.8245	27.9493	20.7995	19.8245
1211	11.05	16.2499	21.2333	23.0744	16.5746	21.7745	20.4745	27.6243	20.4745	20.4745
1212	10.8333	16.4666	21.2333	23.0744	16.5746	22.7494	20.4745	28.2743	20.4745	20.1495
1213	11.05	16.2499	21.0166	23.0744	16.5746	22.4244	20.4745	27.2993	21.1245	19.8245
1214	10.8333	16.2499	21.0166	22.7494	16.5746	22.0994	20.1495	27.9493	20.4745	20.4745
1215	11.2666	16.2499	20.7999	22.7494	16.2496	22.0994	19.8245	27.6243	20.4745	19.8245
1216	10.8333	16.4666	21.2333	22.4244	16.5746	22.4244	20.1495	27.9493	20.4745	20.1495
1217	11.2666	16.2499	21.2333	22.7494	15.9246	22.0994	20.7995	27.6243	20.7995	19.8245
1218	10.8333	16.2499	21.0166	22.7494	15.9246	22.4244	20.4745	27.6243	20.7995	19.8245
1219	10.8333	16.0333	21.0166	22.7494	16.2496	22.4244	20.4745	27.6243	21.4495	20.7995
1220	10.8333	16.2499	20.7999	22.7494	15.9246	22.4244	20.1495	27.2993	20.7995	20.4745
1221	11.05	16.4666	20.7999	22.7494	15.9246	22.4244	20.1495	27.6243	21.7745	19.8245
1222	10.8333	16.2499	21.0166	23.0744	16.2496	22.4244	19.4995	27.6243	20.7995	20.1495
1223	11.2666	16.2499	21.0166	23.0744	15.9246	23.0744	20.4745	27.2993	21.1245	20.1495
1224	11.05	16.2499	20.7999	22.7494	16.5746	23.0744	20.4745	27.9493	20.4745	19.8245
1225	10.8333	16.4666	21.0166	22.7494	16.5746	22.7494	20.4745	26.9743	21.1245	19.8245
1226	11.05	16.4666	21.0166	22.7494	16.5746	22.7494	19.8245	27.6243	21.4495	20.1495
1227	10.8333	16.0333	21.0166	22.7494	16.2496	22.7494	20.7995	27.6243	20.4745	20.1495
1228	11.05	16.4666	20.5833	22.7494	16.5746	22.7494	20.1495	28.2743	21.1245	20.1495
1229	10.8333	16.4666	21.0166	23.0744	16.2496	23.0744	20.7995	27.6243	20.7995	20.1495
1230	10.8333	16.2499	21.0166	22.7494	16.5746	22.7494	20.1495	27.6243	20.1495	19.8245
1231	10.8333	16.6833	21.0166	23.0744	16.5746	22.7494	19.8245	27.9493	20.7995	20.4745
1232	11.2666	16.4666	21.0166	22.4244	16.5746	22.7494	20.1495	27.2993	21.1245	20.1495
1233	11.05	16.0333	21.0166	22.7494	15.9246	22.7494	20.1495	27.9493	20.4745	19.8245
1234	10.8333	16.2499	20.7999	22.7494	16.2496	22.4244	20.4745	27.9493	20.7995	20.1495
1235	11.05	16.2499	21.0166	23.0744	16.5746	22.4244	20.1495	27.2993	20.7995	20.1495
1236	11.05	16.4666	21.2333	22.7494	16.5746	22.7494	20.7995	27.9493	20.7995	19.8245
1237	11.05	16.2499	21.0166	22.7494	16.5746	22.7494	19.8245	27.6243	20.4745	20.1495
1238	10.4	16.4666	21.2333	22.7494	16.2496	23.0744	20.1495	28.2743	20.1495	19.8245
1239	10.8333	16.4666	21.2333	22.4244	16.2496	23.0744	20.7995	27.2993	20.4745	20.1495
1240	10.8333	16.4666	21.2333	22.4244	16.5746	22.7494	20.1495	27.6243	20.4745	20.1495
1241	10.6166	16.2499	20.7999	22.4244	16.2496	22.4244	20.1495	27.6243	20.7995	20.1495
1242	10.6166	16.0333	21.2333	22.7494	15.9246	22.7494	20.7995	27.6243	20.7995	20.1495
1243	11.05	16.2499	20.7999	22.7494	15.9246	22.4244	19.8245	27.9493	20.7995	20.4745
1244	10.8333	16.2499	20.7999	22.7494	16.5746	22.7494	20.4745	27.9493	20.1495	20.4745
1245	10.6166	16.2499	21.0166	22.7494	16.5746	22.7494	20.1495	27.6243	20.7995	20.1495
1246	11.2666	16.2499	21.0166	22.7494	16.5746	22.7494	19.8245	27.6243	20.4745	20.1495
1247	11.2666	16.4666	20.7999	22.7494	16.5746	22.4244	19.8245	27.2993	20.7995	20.1495
1248	10.6166	16.4666	21.0166	22.7494	16.5746	22.4244	19.8245	27.2993	21.1245	20.1495
1249	10.4	16.6833	20.7999	22.7494	16.2496	22.4244	19.4995	27.6243	20.7995	20.1495
1250	11.05	16.4666	21.2333	22.7494	16.5746	22.7494	19.8245	27.9493	20.4745	19.8245
1251	11.05	16.2499	21.0166	22.7494	16.2496	22.7494	20.4745	27.6243	21.1245	20.4745
1252	10.8333	16.2499	21.0166	22.7494	16.5746	22.0994	20.1495	27.9493	20.4745	20.4745
1253	10.8333	16.0333	20.7999	22.7494	16.2496	22.4244	20.1495	27.6243	21.1245	20.4745
1254	11.05	16.0333	21.0166	22.4244	16.2496	22.4244	20.1495	27.2993	20.7995	20.1495
1255	10.8333	16.4666	21.0166	22.4244	15.9246	22.7494	20.1495	27.6243	21.1245	20.1495
1256	11.05	16.4666	21.2333	22.7494	15.5996	22.7494	20.4745	27.6243	20.7995	20.4745
1257	10.8333	16.4666	21.0166	22.4244	15.9246	22.4244	20.1495	27.2993	21.1245	19.8245
1258	10.6166	16.4666	21.0166	22.4244	16.2496	22.0994	20.1495	27.6243	20.7995	20.4745
1259	11.2666	16.2499	21.2333	22.7494	16.2496	22.0994	20.1495	27.2993	21.4495	20.1495
1260	11.4833	16.4666	20.7999	22.7494	16.2496	22.4244	20.1495	27.9493	20.7995	20.1495
1261	11.05	16.6833	21.2333	22.4244	16.2496	22.0994	20.4745	27.9493	21.4495	20.1495
1262	11.4833	16.4666	21.0166	22.7494	16.5746	22.4244	19.8245	27.6243	21.1245	20.7995
1263	11.05	16.4666	21.0166	22.7494	16.2496	21.7745	20.7995	27.9493	21.1245	19.8245
1264	11.05	16.4666	21.0166	22.4244	16.2496	22.0994	19.8245	27.2993	21.1245	20.4745
1265	11.05	16.2499	21.0166	22.7494	16.5746	22.4244	20.1495	27.6243	21.4495	20.4745
1266	11.4833	16.2499	20.7999	22.7494	16.5746	22.4244	20.1495	27.6243	20.7995	20.1495
1267	11.05	16.4666	21.0166	22.7494	16.5746	22.0994	20.1495	27.2993	21.1245	20.4745
1268	11.05	16.4666	21.0166	22.7494	16.5746	22.0994	20.1495	27.2993	20.7995	20.7995
1269	11.05	16.2499	21.0166	22.4244	16.2496	21.7745	19.8245	27.2993	20.7995	20.7995
1270	11.05	16.4666	21.0166	22.4244	16.2496	22.0994	19.8245	27.6243	21.1245	20.1495
1271	11.05	16.4666	21.0166	22.4244	16.5746	22.4244	20.4745	27.6243	21.1245	20.4745
1272	11.2666	16.2499	21.0166	22.7494	16.5746	22.0994	20.1495	27.9493	21.7745	19.8245
1273	10.8333	16.4666	21.0166	22.7494	16.2496	22.0994	20.1495	27.2993	20.7995	20.1495
1274	11.05	16.4666	21.0166	22.7494	16.2496	22.4244	20.4745	27.2993	21.1245	20.4745
1275	11.2666	16.2499	21.0166	22.7494	16.5746	21.7745	20.1495	27.6243	20.7995	20.4745
1276	11.05	16.2499	21.0166	22.7494	16.2496	22.0994	20.4745	27.2993	21.4495	20.1495
1277	10.8333	16.2499	21.0166	22.7494	16.2496	21.7745	20.1495	27.9493	21.1245	20.1495
1278	10.6166	16.2499	20.7999	22.7494	16.2496	22.0994	20.1495	27.9493	20.7995	20.1495
1279	10.8333	16.2499	20.7999	22.4244	15.9246	22.0994	20.1495	27.9493	21.1245	20.1495
1280	10.8333	16.2499	21.0166	22.7494	16.5746	22.0994	20.1495	27.6243	20.7995	20.4745
1281	11.05	16.2499	21.0166	22.7494	16.2496	22.0994	20.1495	27.2993	20.7995	20.4745
1282	10.4	16.2499	21.0166	22.7494	16.5746	22.4244	20.1495	27.6243	21.1245	20.1495
1283	10.8333	16.4666	21.2333	22.7494	16.2496	22.4244	20.1495	27.6243	21.1245	20.4745
1284	11.05	16.0333	21.2333	22.7494	16.2496	21.7745	20.1495	27.6243	20.7995	20.4745
1285	11.05	16.2499	20.7999	22.7494	16.2496	22.0994	20.1495	26.9743	21.1245	20.4745
1286	11.05	16.0333	20.7999	22.7494	16.2496	22.0994	20.1495	27.6243	20.1495	20.4745
1287	11.2666	16.2499	20.7999	22.7494	16.2496	21.7745	20.1495	27.2993	21.4495	20.4745
1288	11.2666	16.4666	21.0166	22.4244	16.2496	22.4244	20.1495	27.9493	21.4495	20.1495
1289	11.2666	16.2499	21.0166	22.7494	16.5746	22.0994	20.4745	27.2993	21.1245	20.1495
1290	11.2666	16.2499	20.7999	22.7494	16.2496	22.4244	20.4745	27.6243	20.1495	20.4745
1291	11.2666	16.2499	21.0166	22.4244	16.2496	22.0994	20.4745	27.6243	21.4495	20.4745
1292	10.6166	16.2499	21.2333	22.4244	16.2496	22.0994	20.1495	27.6243	20.7995	20.4745
1293	11.2666	16.2499	21.0166	22.7494	16.2496	22.4244	20.4745	27.6243	21.1245	20.1495
1294	11.05	16.4666	21.0166	22.4244	16.2496	22.0994	19.8245	27.9493	21.7745	20.1495
1295	11.2666	16.2499	21.0166	22.7494	16.2496	22.0994	20.7995	27.9493	20.7995	20.4745
1296	11.05	16.2499	21.0166	22.7494	16.2496	22.4244	20.4745	27.6243	21.1245	20.4745
1297	10.6166	16.4666	21.0166	22.7494	16.2496	22.4244	20.1495	27.6243	21.1245	20.4745
1298	11.2666	16.2499	21.0166	22.4244	16.2496	21.7745	20.1495	27.6243	21.1245	20.1495
1299	11.2666	16.2499	21.2333	22.4244	16.2496	21.7745	20.1495	27.2993	21.4495	20.1495
1300	11.2666	16.4666	21.0166	22.7494	15.9246	21.7745	20.1495	27.9493	21.1245	20.4745
1301	10.6166	16.2499	21.0166	22.7494	16.2496	22.4244	20.4745	27.9493	21.1245	20.1495
1302	11.2666	16.0333	21.2333	22.7494	16.2496	22.0994	19.8245	27.2993	21.1245	20.1495
1303	11.05	16.4666	21.0166	22.7494	16.2496	21.7745	20.1495	27.2993	20.4745	20.1495
1304	10.8333	16.4666	21.0166	22.4244	16.2496	22.0994	20.7995	27.6243	20.7995	20.7995
1305	11.2666	16.4666	21.0166	22.7494	16.2496	22.0994	20.1495	27.6243	20.4745	20.1495
1306	11.05	16.2499	20.7999	22.4244	16.2496	21.7745	19.4995	27.9493	20.4745	20.1495
1307	11.2666	16.4666	21.0166	22.4244	15.9246	22.4244	20.1495	27.6243	20.7995	20.1495
1308	10.8333	16.4666	21.0166	22.7494	16.2496	22.4244	20.1495	27.9493	21.1245	20.4745
1309	10.8333	16.4666	21.0166	22.4244	16.2496	21.7745	20.1495	27.9493	21.1245	20.1495
1310	11.2666	16.4666	21.0166	22.4244	15.9246	21.7745	20.7995	27.6243	20.7995	20.1495
1311	10.8333	16.0333	21.0166	22.7494	15.9246	21.7745	19.8245	27.9493	20.4745	20.1495
1312	10.8333	16.2499	21.0166	22.7494	16.2496	22.0994	20.1495	27.6243	21.1245	20.1495
1313	11.05	16.2499	21.2333	22.4244	15.9246	21.7745	20.4745	27.6243	21.1245	20.1495
1314	11.2666	16.0333	21.0166	22.4244	16.2496	21.4495	20.1495	28.2743	20.1495	20.1495
1315	10.6166	16.4666	21.0166	22.4244	16.2496	21.4495	20.1495	27.2993	20.7995	20.4745
1316	11.05	16.2499	20.7999	22.7494	15.9246	21.1245	20.1495	27.6243	21.1245	20.1495
1317	11.05	16.2499	21.2333	22.0994	16.2496	21.7745	20.1495	27.6243	21.1245	20.1495
1318	11.2666	16.2499	21.0166	22.7494	15.9246	21.7745	20.1495	28.2743	20.1495	20.1495
1319	10.8333	16.2499	21.0166	22.7494	16.2496	22.0994	20.1495	27.9493	20.7995	20.7995
1320	10.8333	16.2499	21.0166	22.4244	16.2496	21.7745	19.4995	27.2993	20.7995	20.4745
1321	11.05	16.2499	21.0166	22.7494	15.5996	21.7745	20.1495	27.9493	21.1245	20.4745
1322	10.4	16.2499	21.0166	22.4244	15.9246	21.7745	20.1495	27.9493	21.4495	20.1495
1323	11.05	16.0333	21.2333	22.7494	16.2496	22.4244	19.8245	27.6243	21.1245	20.4745
1324	10.8333	16.4666	21.0166	22.7494	16.2496	22.0994	20.4745	27.9493	21.1245	20.4745
1325	10.4	16.2499	21.0166	23.0744	16.2496	21.7745	20.4745	27.9493	21.4495	20.1495
1326	11.05	16.2499	21.2333	22.4244	15.9246	21.7745	20.1495	27.2993	20.4745	20.4745
1327	11.2666	16.0333	21.0166	22.4244	15.9246	21.7745	20.1495	27.2993	20.7995	20.1495
1328	10.8333	16.2499	21.2333	22.4244	16.2496	21.7745	20.4745	27.9493	20.7995	20.1495
1329	11.05	16.0333	21.2333	22.7494	15.9246	22.0994	20.4745	27.9493	21.4495	20.4745
1330	11.05	16.2499	21.2333	22.7494	16.2496	21.7745	20.1495	27.2993	20.4745	20.4745
1331	11.05	16.2499	21.2333	22.7494	16.2496	21.7745	20.1495	27.2993	21.1245	20.4745
1332	10.6166	15.8166	21.0166	22.7494	15.9246	21.4495	20.4745	27.6243	21.1245	20.4745
1333	11.05	16.2499	21.0166	22.7494	16.2496	22.0994	20.4745	28.2743	20.7995	20.1495
1334	11.05	16.4666	21.0166	22.4244	16.2496	21.7745	20.1495	27.6243	21.4495	20.4745
1335	11.05	16.2499	21.4499	22.7494	15.9246	21.7745	20.1495	27.6243	21.1245	20.4745
1336	10.8333	16.0333	21.0166	22.7494	16.2496	21.7745	20.4745	27.6243	21.1245	20.1495
1337	11.05	16.2499	21.0166	22.7494	16.5746	21.7745	20.1495	27.6243	21.7745	20.1495
1338	11.05	16.4666	21.2333	22.7494	15.9246	21.4495	20.4745	27.9493	21.1245	20.4745
1339	10.4	16.0333	21.4499	22.4244	15.9246	21.7745	20.4745	27.6243	20.7995	20.4745
1340	11.4833	16.0333	21.0166	22.7494	16.2496	21.7745	20.1495	27.6243	20.7995	20.4745
1341	11.2666	16.2499	21.0166	22.4244	16.2496	22.0994	20.1495	27.6243	20.7995	20.1495
1342	11.05	16.2499	21.2333	22.7494	16.2496	21.7745	20.4745	27.9493	20.7995	19.8245
1343	11.4833	16.4666	21.2333	22.7494	16.2496	22.0994	20.4745	27.6243	21.4495	20.1495
1344	11.2666	16.2499	21.0166	22.7494	15.9246	21.7745	20.7995	27.6243	20.7995	20.1495
1345	10.8333	16.4666	21.0166	22.7494	15.5996	22.0994	20.7995	28.2743	20.7995	20.1495
1346	10.6166	16.0333	21.0166	22.7494	16.2496	22.0994	20.1495	27.9493	20.4745	20.1495
1347	11.05	16.4666	21.2333	22.7494	15.9246	22.0994	19.4995	27.6243	20.7995	20.1495
1348	11.05	16.4666	21.2333	22.7494	16.2496	22.4244	20.4745	27.9493	21.1245	20.1495
1349	10.8333	16.4666	21.0166	23.0744	16.2496	22.0994	20.1495	27.6243	20.4745	20.1495
1350	11.05	16.2499	21.4499	23.0744	16.5746	22.0994	20.1495	27.2993	20.1495	20.1495
1351	11.05	16.4666	21.0166	23.0744	16.5746	22.4244	20.4745	27.6243	21.1245	20.7995
1352	11.05	16.4666	21.4499	23.0744	16.2496	22.0994	20.4745	27.6243	20.1495	20.1495
1353	10.8333	16.2499	21.0166	23.0744	16.2496	22.0994	20.1495	27.6243	21.1245	20.1495
1354	11.05	16.2499	21.2333	23.0744	16.5746	22.0994	20.1495	27.6243	20.7995	20.1495
1355	10.8333	16.0333	21.2333	23.0744	16.2496	22.4244	20.4745	27.9493	20.4745	19.8245
1356	11.2666	16.2499	21.2333	23.0744	16.5746	22.4244	20.4745	27.6243	20.4745	20.1495
1357	11.05	16.2499	21.2333	23.0744	16.2496	22.0994	20.4745	27.9493	20.4745	20.4745
1358	11.2666	16.2499	21.4499	22.7494	16.2496	22.4244	19.8245	27.6243	20.7995	19.8245
1359	11.2666	16.2499	21.4499	23.0744	16.2496	22.0994	19.8245	27.9493	21.4495	20.1495
1360	10.6166	16.0333	21.2333	23.0744	15.9246	22.4244	20.1495	27.6243	21.1245	20.1495
1361	11.05	16.2499	21.4499	23.0744	15.9246	22.4244	20.4745	27.2993	19.8245	20.1495
1362	11.05	16.2499	21.2333	23.0744	16.2496	22.7494	20.1495	27.6243	20.7995	20.1495
1363	11.05	16.4666	21.2333	23.0744	16.2496	22.7494	20.1495	27.9493	20.1495	19.8245
1364	11.05	16.2499	21.2333	23.0744	16.2496	22.7494	20.4745	27.6243	20.4745	20.1495
1365	11.2666	16.4666	21.4499	23.0744	16.2496	22.0994	20.1495	27.6243	20.4745	19.8245
1366	11.2666	16.2499	21.2333	23.0744	15.9246	22.4244	19.8245	27.6243	20.4745	20.1495
1367	11.2666	16.2499	21.2333	23.0744	16.2496	22.7494	20.1495	27.9493	20.4745	20.1495
1368	10.8333	16.6833	21.2333	23.0744	16.2496	22.7494	20.1495	27.9493	20.4745	20.1495
1369	11.2666	16.2499	21.4499	23.0744	15.9246	22.4244	19.8245	27.6243	21.1245	20.1495
1370	10.4	16.2499	21.2333	23.0744	16.5746	23.0744	20.1495	27.9493	20.7995	20.1495
1371	11.05	16.2499	21.4499	22.7494	16.5746	22.7494	20.1495	27.6243	20.4745	20.1495
1372	11.2666	16.2499	21.2333	23.0744	16.2496	22.7494	20.4745	27.9493	21.1245	20.1495
1373	10.8333	16.2499	21.2333	23.0744	16.5746	22.7494	20.1495	27.9493	20.7995	20.4745
1374	11.05	16.2499	21.2333	23.0744	16.2496	22.7494	20.1495	27.6243	20.4745	19.8245
1375	11.05	16.2499	21.0166	23.0744	15.9246	22.7494	20.1495	27.2993	20.7995	20.1495
1376	11.05	16.2499	21.2333	23.0744	16.2496	22.7494	20.1495	27.9493	20.7995	20.1495
1377	10.8333	16.0333	21.2333	23.0744	15.9246	22.4244	20.4745	27.6243	21.4495	19.8245
1378	10.8333	16.2499	21.4499	23.0744	16.2496	22.7494	20.4745	28.2743	20.1495	20.1495
1379	11.2666	16.2499	21.2333	23.0744	16.2496	22.7494	20.4745	27.6243	21.4495	20.1495
1380	10.8333	16.2499	21.4499	23.0744	16.2496	22.4244	20.1495	27.9493	20.4745	20.1495
1381	11.05	16.2499	21.2333	23.0744	16.2496	22.7494	20.1495	28.2743	21.4495	20.1495
1382	10.8333	16.2499	21.4499	23.0744	15.9246	22.7494	20.4745	27.6243	20.7995	20.1495
1383	11.4833	16.2499	21.2333	23.0744	16.2496	22.7494	20.1495	27.9493	20.7995	20.1495
1384	10.4	16.2499	21.0166	23.0744	16.2496	22.4244	19.8245	27.6243	20.1495	20.1495
1385	10.6166	16.4666	21.0166	23.0744	16.2496	22.4244	19.8245	26.9743	20.4745	20.1495
1386	10.8333	16.2499	21.2333	23.0744	16.2496	22.7494	20.1495	27.6243	20.1495	20.1495
1387	10.8333	16.2499	21.0166	23.0744	16.2496	22.7494	19.8245	27.6243	20.4745	20.1495
1388	10.1833	16.0333	21.4499	23.0744	16.8996	22.7494	20.1495	27.6243	21.1245	20.4745
1389	10.6166	16.2499	21.2333	23.0744	16.8996	22.4244	19.8245	27.9493	21.1245	20.1495
1390	11.05	16.2499	21.0166	23.0744	16.5746	22.7494	20.1495	27.6243	21.7745	20.4745
1391	10.6166	16.2499	20.7999	23.0744	16.5746	22.4244	19.8245	28.2743	20.4745	20.1495
1392	11.05	16.2499	21.2333	23.0744	16.5746	22.7494	20.1495	27.6243	21.7745	20.1495
1393	11.05	16.2499	21.2333	23.0744	16.2496	22.7494	20.1495	27.9493	21.1245	20.4745
1394	11.2666	16.2499	21.0166	23.0744	16.5746	22.7494	20.4745	27.2993	21.7745	20.1495
1395	11.4833	16.4666	21.0166	23.0744	16.2496	22.7494	20.1495	27.6243	20.1495	20.1495
1396	10.8333	16.4666	21.2333	23.0744	15.9246	22.4244	20.4745	27.9493	21.4495	20.1495
1397	11.05	16.0333	21.0166	23.0744	16.5746	22.4244	19.8245	27.9493	22.0994	20.7995
1398	11.05	16.0333	20.7999	23.0744	16.8996	22.7494	20.7995	27.9493	21.7745	20.1495
1399	10.8333	16.4666	20.7999	23.0744	16.2496	22.4244	20.4745	27.2993	20.7995	20.1495
1400	11.05	16.2499	20.7999	23.0744	16.5746	22.7494	20.4745	28.2743	21.1245	20.4745
1401	11.2666	16.2499	21.0166	22.7494	16.5746	22.0994	19.8245	27.6243	21.1245	19.8245
1402	11.2666	16.2499	21.0166	22.7494	16.8996	22.4244	19.8245	27.6243	21.1245	20.1495
1403	11.05	15.8166	20.7999	23.0744	16.8996	22.7494	20.4745	27.6243	21.7745	20.4745
1404	10.8333	16.0333	20.7999	22.7494	16.5746	22.4244	19.8245	27.6243	21.4495	20.1495
1405	10.8333	16.0333	21.0166	22.7494	16.8996	22.7494	20.1495	28.5993	21.7745	20.1495
1406	11.4833	16.2499	20.7999	23.0744	16.5746	22.4244	19.8245	27.6243	22.0994	19.8245
1407	11.05	16.2499	21.0166	23.0744	16.5746	22.4244	20.1495	27.2993	21.1245	20.4745
1408	11.2666	16.2499	20.7999	23.0744	16.8996	22.4244	20.1495	28.2743	21.4495	20.4745
1409	11.4833	16.4666	21.0166	22.7494	16.8996	22.4244	20.1495	27.9493	21.1245	19.8245
1410	10.8333	16.2499	20.7999	23.0744	16.5746	22.4244	20.4745	27.6243	21.4495	20.1495
1411	11.4833	16.4666	21.0166	23.0744	16.2496	22.4244	20.4745	27.9493	21.1245	19.8245
1412	11.05	16.4666	20.7999	23.0744	16.5746	21.7745	19.8245	28.2743	20.7995	20.1495
1413	10.8333	16.4666	21.0166	23.0744	16.5746	22.0994	19.8245	27.9493	21.7745	20.1495
1414	10.6166	16.2499	21.2333	23.0744	16.5746	22.4244	20.1495	27.9493	22.4244	19.8245
1415	11.2666	16.4666	21.0166	22.7494	16.5746	22.7494	20.7995	28.2743	21.4495	19.8245
1416	11.05	16.4666	21.2333	23.0744	16.8996	22.4244	20.1495	27.9493	21.7745	20.1495
1417	10.8333	16.0333	20.7999	23.0744	16.5746	22.4244	19.8245	28.2743	21.7745	20.1495
1418	10.4	16.4666	21.0166	23.0744	16.5746	22.4244	19.8245	27.9493	21.4495	20.4745
1419	10.8333	16.4666	20.7999	23.0744	16.2496	22.4244	19.8245	27.9493	21.7745	20.4745
1420	10.6166	16.4666	21.0166	23.0744	16.2496	22.4244	19.4995	28.2743	21.4495	20.1495
1421	11.05	16.0333	21.2333	23.0744	16.2496	22.4244	20.4745	27.9493	22.0994	20.1495
1422	10.8333	16.0333	21.2333	23.0744	16.5746	21.7745	19.1745	27.6243	21.7745	19.8245
1423	11.05	16.4666	21.0166	23.0744	17.2246	22.4244	19.8245	27.9493	21.7745	20.1495
1424	10.8333	16.4666	21.0166	23.0744	16.5746	22.4244	20.1495	28.2743	21.7745	20.1495
1425	10.6166	16.2499	21.2333	23.0744	16.5746	21.7745	20.4745	27.6243	21.4495	19.8245
1426	11.2666	16.4666	21.2333	22.7494	16.5746	22.4244	19.8245	28.2743	19.8245	20.1495
1427	10.8333	16.2499	21.2333	23.0744	17.2246	22.4244	20.4745	27.2993	20.7995	19.8245
1428	10.8333	16.4666	21.0166	23.0744	17.2246	22.4244	19.8245	27.6243	20.1495	20.1495
1429	10.8333	16.4666	21.2333	22.7494	16.5746	22.0994	20.1495	28.5993	21.7745	20.1495
1430	11.05	16.2499	20.7999	23.0744	16.5746	22.0994	20.1495	28.5993	20.1495	20.4745
1431	10.4	16.2499	21.0166	23.0744	16.5746	22.7494	20.1495	27.9493	20.7995	20.1495
1432	11.05	16.6833	21.0166	23.0744	16.5746	22.0994	20.4745	27.6243	20.4745	20.1495
1433	11.2666	16.2499	21.2333	23.0744	16.2496	22.4244	20.4745	28.2743	21.1245	20.1495
1434	10.8333	16.2499	20.7999	23.0744	16.5746	22.4244	20.1495	27.6243	21.1245	19.8245
1435	10.8333	16.4666	21.0166	23.0744	16.5746	22.4244	20.1495	27.9493	20.7995	20.4745
1436	10.1833	16.4666	21.0166	23.0744	16.5746	22.4244	20.4745	28.2743	20.7995	20.4745
1437	10.6166	16.2499	21.0166	22.7494	16.2496	22.0994	20.1495	28.5993	21.1245	19.8245
1438	10.6166	16.0333	21.0166	23.0744	16.5746	22.4244	20.1495	28.5993	21.4495	20.1495
1439	10.6166	16.2499	21.0166	23.0744	16.2496	22.4244	20.1495	27.2993	20.7995	19.8245
1440	10.8333	16.4666	21.0166	23.0744	16.5746	22.0994	19.8245	27.9493	21.7745	19.8245
1441	10.8333	16.2499	21.2333	23.0744	16.5746	22.7494	20.1495	28.2743	21.4495	19.8245
1442	11.05	16.2499	21.0166	23.0744	16.2496	22.4244	20.1495	27.9493	21.7745	19.8245
1443	10.8333	16.0333	21.0166	23.0744	16.2496	22.4244	20.1495	27.9493	21.1245	20.1495
1444	10.6166	16.2499	21.0166	22.7494	16.8996	22.4244	20.1495	26.9743	21.7745	19.8245
1445	10.4	16.2499	21.2333	23.0744	16.2496	22.7494	20.4745	28.2743	21.1245	19.8245
1446	11.2666	16.2499	21.0166	23.0744	16.5746	22.7494	19.8245	27.9493	20.7995	20.1495
1447	11.2666	16.4666	21.2333	23.0744	16.5746	22.7494	19.8245	28.2743	21.7745	20.1495
1448	10.8333	16.2499	21.0166	23.0744	16.8996	22.7494	19.8245	27.6243	22.0994	19.4995
1449	11.05	16.4666	21.2333	23.0744	16.8996	22.4244	20.1495	27.2993	21.4495	19.8245
1450	11.05	16.4666	21.0166	23.0744	16.5746	22.7494	20.4745	28.2743	21.1245	19.8245
1451	11.05	16.4666	21.2333	23.0744	17.2246	22.7494	20.4745	27.9493	21.7745	20.1495
1452	10.4	16.2499	21.0166	23.0744	16.5746	22.4244	20.4745	28.2743	21.7745	20.1495
1453	10.8333	16.4666	21.0166	23.0744	16.5746	22.7494	20.1495	27.9493	21.1245	20.1495
1454	11.4833	16.0333	21.0166	23.0744	16.5746	22.7494	19.8245	28.5993	21.4495	20.1495
1455	10.8333	16.2499	21.0166	23.0744	16.2496	22.7494	20.7995	28.5993	22.0994	20.4745
1456	10.4	16.2499	21.0166	22.7494	16.2496	22.4244	20.7995	28.2743	21.4495	20.1495
1457	11.2666	15.8166	21.0166	23.0744	16.2496	22.4244	20.4745	27.9493	21.1245	19.8245
1458	11.05	16.0333	21.0166	22.7494	16.5746	22.0994	20.1495	27.6243	21.4495	20.1495
1459	10.6166	16.2499	21.2333	23.0744	16.5746	22.4244	19.4995	27.9493	21.7745	20.1495
1460	10.6166	16.2499	21.0166	23.0744	16.5746	22.4244	19.8245	28.5993	21.1245	20.1495
1461	10.8333	16.0333	21.0166	23.0744	16.5746	22.4244	20.4745	28.2743	21.1245	20.1495
1462	10.8333	16.2499	21.2333	23.0744	16.8996	22.0994	20.1495	27.9493	21.4495	19.8245
1463	11.05	16.0333	21.0166	22.7494	16.8996	22.4244	20.1495	27.9493	20.7995	20.4745
1464	11.2666	15.8166	21.2333	23.0744	16.5746	22.0994	20.4745	27.9493	21.1245	20.4745
1465	11.05	16.0333	20.7999	22.7494	16.5746	22.4244	20.1495	27.6243	21.4495	20.1495
1466	10.1833	16.0333	21.0166	22.7494	16.8996	22.0994	20.4745	27.9493	21.4495	19.8245
1467	11.05	16.2499	20.7999	23.0744	16.5746	22.0994	20.1495	27.6243	21.4495	20.1495
1468	11.2666	16.2499	21.0166	23.0744	16.5746	22.4244	20.1495	28.2743	21.7745	20.1495
1469	11.05	16.4666	21.2333	23.0744	16.5746	22.4244	20.4745	27.9493	21.7745	19.8245
1470	11.05	16.0333	21.2333	23.0744	16.2496	22.4244	20.1495	28.2743	21.1245	20.1495
1471	10.8333	16.2499	20.7999	23.0744	16.5746	22.7494	19.8245	27.9493	21.7745	20.4745
1472	10.8333	16.0333	20.7999	22.7494	16.5746	22.4244	19.4995	27.9493	21.4495	20.1495
1473	11.05	16.2499	20.5833	23.0744	16.5746	22.4244	20.4745	27.9493	21.4495	19.8245
1474	10.8333	16.0333	21.0166	23.0744	16.5746	22.7494	20.1495	27.6243	21.4495	19.8245
1475	10.8333	16.0333	20.7999	23.0744	16.8996	22.0994	20.4745	27.9493	21.4495	19.8245
1476	10.1833	16.0333	21.4499	22.4244	16.8996	21.7745	20.1495	27.9493	21.1245	19.8245
1477	10.6166	16.0333	21.2333	23.0744	16.5746	23.0744	19.8245	27.9493	21.1245	19.8245
1478	10.6166	16.0333	21.2333	22.7494	16.8996	22.0994	20.1495	27.9493	21.4495	20.1495
1479	10.8333	16.0333	21.0166	22.4244	16.8996	22.4244	20.4745	27.9493	21.4495	20.1495
1480	11.05	16.0333	21.2333	23.0744	16.8996	22.7494	20.1495	27.6243	21.4495	19.8245
1481	11.05	15.8166	20.7999	23.0744	16.8996	22.4244	20.4745	27.6243	21.4495	20.4745
1482	11.2666	16.2499	21.2333	23.0744	16.5746	22.4244	19.8245	27.6243	21.4495	20.1495
1483	10.6166	16.0333	21.0166	23.0744	16.5746	22.7494	20.1495	27.9493	21.1245	20.1495
1484	10.4	16.0333	21.2333	22.7494	16.8996	22.7494	19.8245	27.2993	21.4495	20.1495
1485	10.6166	16.0333	20.7999	23.0744	16.8996	22.4244	20.4745	27.6243	21.4495	19.8245
1486	10.6166	16.0333	21.0166	23.0744	16.5746	22.7494	20.1495	27.9493	20.7995	19.8245
1487	10.8333	16.0333	21.2333	23.0744	16.8996	22.0994	19.8245	27.9493	21.7745	19.8245
1488	10.6166	16.2499	21.0166	23.0744	17.2246	22.4244	20.1495	27.9493	20.7995	19.8245
1489	10.1833	16.0333	21.2333	23.0744	16.8996	22.4244	20.1495	27.9493	20.7995	20.1495
1490	10.4	16.0333	21.4499	23.0744	16.5746	22.0994	20.1495	27.9493	21.1245	20.1495
1491	10.8333	16.0333	21.0166	23.0744	16.5746	22.0994	19.8245	28.5993	21.1245	20.1495
1492	10.6166	16.0333	21.0166	22.7494	16.8996	22.0994	20.1495	27.9493	21.7745	20.1495
1493	11.05	15.8166	21.2333	23.0744	16.8996	22.4244	19.8245	27.2993	21.1245	19.8245
1494	11.2666	16.2499	20.7999	23.0744	16.8996	22.7494	19.8245	27.6243	21.1245	20.4745
1495	10.1833	16.4666	21.0166	23.0744	16.8996	22.4244	20.1495	27.6243	20.7995	20.7995
1496	11.05	16.2499	21.0166	23.0744	16.8996	22.7494	20.1495	27.9493	21.4495	20.1495
1497	10.4	16.2499	21.2333	22.7494	16.5746	22.4244	19.8245	28.2743	21.4495	20.1495
1498	11.05	16.0333	21.0166	23.0744	17.2246	22.4244	20.4745	27.6243	21.4495	20.4745
1499	11.05	16.0333	20.7999	22.7494	17.2246	22.7494	20.1495	27.6243	21.1245	20.1495
1500	10.6166	16.0333	21.4499	23.0744	17.2246	22.7494	19.8245	27.9493	22.0994	20.1495
1501	11.05	16.2499	21.0166	23.0744	16.5746	22.7494	20.1495	27.9493	22.4244	20.4745
1502	11.05	16.2499	21.2333	23.0744	16.2496	22.4244	19.8245	27.6243	21.7745	20.4745
1503	10.8333	15.8166	21.0166	23.0744	16.5746	22.0994	20.1495	27.6243	22.0994	19.8245
1504	10.8333	16.0333	21.2333	23.0744	17.2246	22.4244	20.4745	27.9493	20.4745	19.8245
1505	10.8333	16.0333	21.2333	23.0744	17.2246	22.7494	20.1495	27.9493	22.4244	20.4745
1506	10.8333	16.2499	20.7999	23.0744	16.8996	22.4244	19.4995	27.2993	21.7745	20.1495
1507	11.05	15.8166	21.0166	23.0744	16.8996	22.7494	20.1495	27.9493	22.0994	20.4745
1508	10.8333	16.2499	21.0166	23.0744	16.5746	22.4244	19.8245	27.9493	22.0994	20.4745
1509	10.1833	15.8166	20.7999	23.0744	16.5746	22.7494	19.8245	27.9493	22.0994	20.4745
1510	11.2666	15.8166	21.2333	23.0744	16.5746	22.0994	20.1495	27.6243	21.7745	20.1495
1511	11.7	16.2499	21.2333	23.0744	16.5746	22.7494	19.8245	27.6243	22.4244	20.4745
1512	10.8333	16.2499	21.2333	22.7494	16.5746	22.0994	19.4995	27.9493	22.0994	20.4745
1513	10.8333	16.2499	21.0166	23.0744	16.5746	22.4244	20.1495	28.2743	22.0994	19.8245
1514	10.8333	16.0333	21.4499	23.0744	16.8996	22.0994	19.4995	27.9493	22.4244	19.8245
1515	10.4	16.0333	21.2333	23.0744	16.5746	22.0994	19.4995	28.2743	22.0994	20.1495
1516	10.8333	15.8166	21.4499	23.0744	16.8996	22.0994	19.8245	28.2743	22.4244	20.1495
1517	10.8333	16.0333	21.2333	23.0744	16.2496	22.0994	19.8245	28.5993	22.0994	20.1495
1518	10.8333	16.2499	21.2333	23.0744	16.5746	22.4244	19.8245	27.9493	22.0994	20.1495
1519	10.8333	16.2499	21.0166	23.0744	16.2496	22.0994	19.8245	27.9493	22.0994	20.1495
1520	10.6166	16.2499	21.2333	22.7494	16.5746	22.4244	20.1495	27.9493	22.4244	19.8245
1521	11.05	15.8166	21.2333	23.0744	16.5746	22.4244	20.1495	27.9493	22.4244	20.1495
1522	10.1833	16.2499	21.2333	23.0744	15.9246	22.0994	20.1495	27.9493	22.0994	20.1495
1523	11.05	15.8166	21.2333	22.7494	16.5746	21.7745	19.4995	27.9493	22.4244	19.8245
1524	11.2666	15.8166	21.2333	23.0744	16.2496	21.7745	20.1495	27.6243	22.0994	19.8245
1525	11.05	16.0333	21.2333	23.0744	16.5746	21.7745	20.4745	27.9493	22.0994	19.8245
1526	10.1833	16.0333	21.4499	22.7494	16.5746	22.0994	19.8245	27.6243	22.0994	19.8245
1527	10.6166	16.0333	21.2333	23.0744	16.2496	21.7745	20.1495	27.9493	22.0994	20.1495
1528	11.2666	16.0333	21.2333	23.0744	15.9246	22.4244	19.4995	27.9493	22.0994	20.1495
1529	10.6166	15.8166	21.2333	23.0744	16.8996	22.0994	19.8245	28.2743	22.0994	20.1495
1530	10.8333	16.0333	21.2333	23.0744	15.9246	22.4244	19.8245	27.9493	22.4244	19.8245
1531	10.6166	16.0333	21.2333	23.3994	16.2496	22.4244	20.4745	27.9493	22.0994	20.1495
1532	11.2666	16.0333	21.2333	23.0744	16.2496	22.4244	20.1495	27.9493	22.4244	20.1495
1533	11.2666	16.0333	21.2333	23.0744	16.2496	22.7494	20.4745	27.6243	22.4244	20.1495
1534	11.05	16.0333	21.2333	23.3994	16.5746	22.0994	20.1495	28.5993	22.0994	20.1495
1535	11.2666	16.2499	21.0166	23.3994	16.5746	22.4244	19.8245	28.5993	22.0994	20.1495
1536	11.05	16.0333	21.0166	23.3994	16.2496	22.7494	19.8245	28.2743	22.4244	20.4745
1537	11.05	16.0333	21.2333	23.0744	16.5746	22.7494	20.4745	27.9493	22.0994	20.1495
1538	10.8333	16.0333	20.7999	23.0744	16.5746	22.4244	20.4745	27.9493	22.0994	20.1495
1539	10.8333	16.0333	21.0166	23.3994	16.2496	21.7745	19.8245	28.2743	22.0994	20.1495
1540	10.8333	16.0333	20.7999	23.3994	16.2496	22.0994	20.4745	27.9493	22.4244	20.1495
1541	11.2666	16.0333	21.2333	23.3994	16.2496	22.0994	19.8245	27.9493	22.0994	20.4745
1542	10.6166	16.0333	21.2333	23.0744	15.9246	22.0994	19.8245	27.9493	22.0994	20.1495
1543	10.4	16.0333	21.0166	23.3994	16.5746	22.7494	20.1495	28.2743	22.4244	20.1495
1544	10.6166	16.0333	21.0166	23.3994	15.9246	22.4244	19.8245	27.6243	22.0994	20.1495
1545	11.05	16.2499	21.0166	23.3994	15.9246	22.0994	20.4745	27.9493	22.0994	20.1495
1546	11.2666	16.0333	21.0166	23.3994	16.2496	22.0994	20.4745	28.5993	22.0994	19.8245
1547	10.4	16.0333	21.0166	23.3994	16.2496	22.0994	20.4745	27.9493	22.0994	20.1495
1548	11.2666	16.0333	20.5833	23.3994	16.2496	22.4244	20.1495	27.9493	22.0994	19.8245
1549	10.8333	16.0333	21.0166	23.3994	15.9246	22.0994	19.8245	27.9493	22.0994	19.8245
1550	10.8333	16.0333	21.0166	23.3994	15.9246	21.7745	20.1495	27.9493	21.7745	19.8245
1551	10.6166	16.0333	21.2333	23.0744	15.9246	22.0994	20.1495	27.6243	22.0994	19.8245
1552	10.4	16.0333	20.5833	23.3994	16.5746	22.4244	19.4995	28.2743	22.0994	20.4745
1553	10.4	15.5999	20.7999	23.3994	15.9246	22.0994	20.1495	27.9493	21.7745	20.4745
1554	11.4833	16.0333	20.7999	23.0744	15.9246	22.4244	20.4745	27.9493	22.0994	20.1495
1555	11.2666	16.0333	20.5833	23.3994	15.9246	22.4244	20.1495	27.6243	22.0994	20.1495
1556	10.6166	16.2499	20.7999	23.3994	15.5996	22.4244	19.8245	28.9243	22.4244	19.8245
1557	11.2666	16.0333	20.7999	23.3994	15.9246	22.4244	20.1495	28.2743	22.0994	20.1495
1558	11.2666	16.2499	20.5833	23.0744	16.2496	22.0994	20.7995	27.9493	22.0994	20.1495
1559	10.8333	16.0333	21.0166	23.3994	15.9246	22.0994	20.1495	27.6243	22.0994	20.1495
1560	10.8333	16.0333	20.7999	23.0744	15.5996	21.7745	19.4995	28.2743	22.4244	20.1495
1561	10.8333	16.0333	20.7999	23.3994	15.9246	21.7745	19.8245	27.6243	22.4244	20.1495
1562	11.4833	16.2499	20.7999	23.0744	15.9246	22.0994	20.4745	28.2743	22.0994	19.8245
1563	11.05	16.0333	20.7999	23.0744	15.9246	21.7745	20.4745	28.2743	22.0994	20.1495
1564	11.2666	16.0333	20.7999	23.3994	16.2496	22.0994	20.4745	28.2743	22.0994	19.8245
1565	10.6166	16.0333	20.7999	23.0744	16.2496	22.0994	20.4745	28.2743	22.0994	19.8245
1566	11.2666	16.0333	20.7999	23.3994	16.2496	21.7745	20.4745	27.9493	22.0994	20.1495
1567	10.4	16.0333	20.7999	23.0744	15.2746	22.4244	20.4745	27.9493	22.0994	20.1495
1568	10.8333	16.0333	21.0166	23.0744	15.5996	22.0994	19.8245	27.9493	22.0994	20.1495
1569	11.4833	16.0333	20.7999	23.3994	15.9246	22.0994	20.4745	28.5993	22.0994	20.1495
1570	11.05	16.0333	20.7999	23.0744	16.2496	21.7745	20.1495	27.9493	21.7745	20.1495
1571	10.6166	16.2499	20.5833	23.3994	15.9246	22.0994	20.1495	27.9493	22.0994	20.1495
1572	11.4833	16.2499	20.7999	23.3994	15.5996	22.4244	20.1495	27.9493	22.4244	20.1495
1573	10.8333	16.2499	21.0166	23.0744	15.9246	22.0994	21.1245	28.2743	22.0994	20.1495
1574	11.2666	16.0333	20.7999	23.0744	15.9246	22.0994	20.4745	28.5993	22.0994	20.1495
1575	11.05	16.2499	20.7999	23.0744	15.9246	22.0994	20.1495	28.2743	22.0994	19.8245
1576	11.05	16.2499	20.7999	23.0744	15.9246	21.7745	20.1495	27.6243	21.7745	20.1495
1577	11.2666	16.2499	20.5833	23.0744	15.5996	21.7745	19.8245	28.2743	22.0994	20.1495
1578	11.05	16.2499	21.0166	23.3994	15.9246	22.0994	20.1495	27.9493	22.4244	20.1495
1579	10.8333	16.0333	20.7999	23.0744	15.9246	22.0994	20.1495	28.2743	22.0994	20.4745
1580	11.4833	16.2499	21.0166	23.3994	15.5996	21.7745	20.4745	27.9493	22.4244	20.1495
1581	11.4833	16.2499	21.0166	23.3994	15.9246	22.0994	20.1495	28.5993	21.7745	20.1495
1582	11.05	16.2499	20.5833	23.3994	16.2496	22.0994	19.4995	28.5993	21.7745	19.8245
1583	11.05	16.0333	20.7999	23.3994	15.9246	22.0994	20.7995	28.5993	22.0994	20.1495
1584	10.6166	16.4666	20.7999	23.3994	15.9246	21.7745	20.4745	28.2743	22.0994	20.1495
1585	11.05	16.0333	21.0166	23.0744	16.2496	22.0994	20.1495	27.9493	22.0994	20.1495
1586	10.6166	16.2499	21.2333	23.3994	15.2746	22.0994	20.4745	27.9493	22.0994	19.8245
1587	11.05	16.2499	21.0166	23.3994	15.9246	21.7745	20.1495	28.2743	22.0994	20.1495
1588	11.05	16.2499	21.0166	23.0744	15.5996	21.7745	20.4745	28.2743	22.0994	20.1495
1589	10.8333	16.0333	21.0166	23.0744	16.2496	21.7745	20.1495	28.5993	22.0994	20.7995
1590	11.2666	16.2499	21.2333	23.0744	16.2496	22.0994	20.4745	27.9493	21.7745	20.1495
1591	11.2666	16.2499	21.2333	23.3994	15.9246	22.0994	20.4745	28.2743	22.4244	20.1495
1592	11.05	16.2499	21.2333	23.0744	15.9246	22.4244	20.1495	28.2743	22.0994	20.1495
1593	11.05	16.0333	21.2333	23.0744	15.5996	22.4244	20.4745	28.2743	22.0994	20.1495
1594	10.6166	16.2499	21.0166	23.0744	16.2496	22.4244	20.1495	28.2743	22.0994	20.7995
1595	11.4833	16.0333	21.2333	23.0744	16.2496	22.4244	20.1495	28.5993	21.7745	20.4745
1596	11.2666	16.4666	20.7999	23.0744	16.5746	21.7745	20.7995	28.2743	22.0994	20.1495
1597	11.2666	16.2499	20.7999	23.3994	16.2496	22.0994	20.1495	28.2743	21.7745	19.8245
1598	11.2666	16.4666	21.0166	23.0744	16.2496	22.0994	20.1495	27.9493	22.4244	20.1495
1599	10.8333	16.2499	21.0166	23.0744	16.5746	21.7745	20.4745	28.5993	22.0994	20.1495
1600	10.8333	16.4666	20.7999	23.0744	16.2496	21.7745	21.1245	27.9493	22.0994	20.1495
1601	10.8333	16.4666	21.0166	23.0744	16.2496	22.0994	20.4745	28.2743	22.4244	20.1495
1602	10.8333	16.2499	21.0166	23.0744	16.2496	22.4244	20.1495	28.5993	22.0994	20.1495
1603	10.8333	16.4666	21.0166	23.0744	16.8996	21.7745	20.1495	28.2743	22.4244	20.4745
1604	11.2666	16.4666	21.0166	23.0744	16.8996	21.7745	19.8245	27.9493	22.4244	20.1495
1605	11.2666	16.4666	21.2333	23.3994	16.2496	22.0994	20.4745	27.9493	22.4244	20.1495
1606	10.8333	16.4666	20.7999	23.3994	16.2496	21.1245	20.4745	28.2743	22.4244	20.1495
1607	10.4	16.4666	21.0166	23.0744	16.2496	21.4495	20.1495	27.9493	22.4244	20.4745
1608	10.6166	16.4666	21.2333	23.0744	15.9246	21.7745	20.1495	28.5993	22.4244	20.4745
1609	10.8333	16.4666	21.0166	23.3994	15.9246	21.4495	20.1495	27.6243	22.0994	20.4745
1610	11.05	16.4666	20.7999	23.3994	15.9246	22.0994	20.4745	27.9493	22.4244	20.1495
1611	11.05	16.2499	21.2333	23.0744	15.9246	22.4244	20.1495	28.2743	22.0994	20.4745
1612	11.05	16.4666	21.0166	23.0744	16.5746	22.0994	20.7995	27.9493	22.0994	20.7995
1613	11.4833	16.6833	21.0166	23.0744	16.2496	22.0994	20.4745	27.9493	22.4244	20.4745
1614	11.4833	16.4666	21.0166	23.3994	16.2496	22.4244	20.4745	28.5993	22.0994	20.1495
1615	10.8333	16.4666	21.0166	23.0744	15.9246	21.7745	20.4745	28.2743	22.4244	20.7995
1616	10.6166	16.4666	21.0166	23.0744	16.2496	22.0994	20.1495	28.2743	22.4244	20.7995
1617	10.8333	16.4666	21.0166	23.0744	15.9246	22.0994	20.1495	28.2743	22.4244	20.7995
1618	11.2666	16.6833	20.7999	23.0744	16.2496	22.0994	20.1495	27.9493	22.4244	20.1495
1619	10.8333	16.6833	20.7999	23.0744	16.2496	22.4244	20.7995	28.5993	22.4244	20.4745
1620	10.6166	16.4666	21.0166	23.0744	15.5996	22.4244	20.4745	28.2743	22.4244	20.4745
1621	10.4	16.2499	21.0166	23.3994	16.2496	22.0994	19.8245	28.2743	22.4244	21.1245
1622	11.05	16.2499	21.0166	23.3994	15.9246	22.0994	20.4745	28.2743	22.4244	20.7995
1623	10.8333	16.2499	21.0166	23.0744	15.9246	22.4244	20.4745	28.2743	22.0994	20.4745
1624	10.8333	16.2499	21.0166	23.0744	15.9246	22.0994	20.4745	28.2743	21.7745	20.1495
1625	11.05	16.4666	20.7999	23.0744	15.9246	22.4244	20.4745	28.5993	22.0994	20.4745
1626	11.05	16.4666	21.0166	23.0744	15.9246	22.0994	20.1495	27.9493	22.0994	20.7995
1627	11.05	16.4666	20.7999	23.0744	16.2496	22.4244	20.1495	27.6243	22.0994	20.4745
1628	10.8333	16.2499	21.0166	23.3994	16.2496	22.4244	20.1495	28.2743	22.4244	20.4745
1629	10.8333	16.4666	21.0166	23.0744	16.5746	22.7494	20.4745	28.2743	22.0994	20.4745
1630	11.2666	16.4666	21.0166	23.3994	16.2496	22.7494	19.8245	27.9493	21.7745	20.4745
1631	11.05	16.2499	20.7999	23.3994	16.2496	22.4244	20.4745	27.9493	21.7745	20.1495
1632	11.2666	16.0333	21.2333	23.0744	15.9246	22.7494	20.7995	28.2743	21.7745	20.4745
1633	10.6166	16.2499	21.0166	23.0744	15.9246	22.4244	20.1495	28.5993	22.0994	20.4745
1634	11.4833	16.2499	21.0166	23.0744	16.2496	22.4244	20.4745	28.2743	21.7745	20.1495
1635	10.4	16.2499	21.0166	23.0744	16.2496	22.7494	20.1495	27.9493	22.0994	20.4745
1636	10.8333	16.4666	21.0166	23.3994	15.9246	22.4244	21.1245	27.9493	21.7745	20.4745
1637	10.8333	16.2499	20.7999	23.0744	16.2496	22.0994	20.7995	27.9493	22.0994	20.7995
1638	11.2666	16.4666	21.0166	23.0744	16.5746	22.4244	20.1495	27.6243	21.7745	20.4745
1639	10.8333	16.2499	20.7999	23.0744	16.2496	22.0994	20.4745	28.2743	21.7745	20.7995
1640	11.05	16.4666	21.0166	23.0744	16.2496	22.0994	20.7995	28.5993	22.0994	20.1495
1641	10.6166	16.2499	21.0166	23.0744	15.9246	21.7745	20.1495	27.9493	21.7745	20.1495
1642	10.6166	16.4666	21.2333	23.0744	16.2496	22.4244	20.4745	28.2743	22.0994	20.4745
1643	10.8333	16.2499	21.0166	23.0744	16.2496	22.0994	21.1245	28.2743	21.7745	20.1495
1644	11.05	16.2499	21.0166	23.0744	16.2496	22.0994	20.4745	28.2743	21.7745	20.4745
1645	11.2666	16.2499	20.7999	23.0744	16.5746	22.4244	20.1495	28.2743	21.7745	19.4995
1646	10.8333	16.2499	21.0166	23.0744	16.2496	22.4244	19.8245	27.9493	21.7745	20.1495
1647	10.8333	16.0333	21.0166	23.0744	16.2496	22.0994	20.1495	28.2743	21.7745	20.4745
1648	10.6166	16.2499	21.0166	23.3994	16.5746	21.7745	20.1495	27.6243	22.0994	20.4745
1649	11.05	16.2499	21.2333	23.0744	16.2496	22.4244	20.4745	28.2743	21.7745	19.8245
1650	10.4	16.2499	20.7999	23.3994	16.5746	21.7745	20.1495	27.9493	22.0994	19.8245
1651	11.05	16.2499	21.2333	23.3994	16.2496	22.0994	20.4745	28.2743	22.0994	20.1495
1652	10.6166	16.0333	21.0166	23.3994	16.5746	22.4244	19.8245	27.9493	21.7745	20.1495
1653	11.05	16.2499	20.7999	23.0744	16.5746	22.0994	20.7995	27.9493	22.0994	20.1495
1654	10.8333	16.2499	21.2333	23.0744	16.5746	22.4244	20.7995	28.2743	21.7745	20.1495
1655	10.1833	16.2499	20.7999	23.0744	16.2496	22.0994	20.7995	28.2743	21.7745	20.1495
1656	10.8333	16.2499	21.0166	23.0744	16.2496	22.0994	20.1495	27.9493	21.7745	20.1495
1657	11.05	16.4666	21.0166	23.0744	16.2496	22.0994	20.4745	28.2743	21.7745	20.4745
1658	11.05	16.2499	21.0166	23.3994	16.5746	22.4244	20.4745	28.2743	21.7745	20.1495
1659	11.05	16.2499	21.0166	23.0744	16.2496	22.0994	20.4745	28.2743	21.7745	20.1495
1660	11.05	16.0333	21.0166	23.0744	16.2496	22.4244	20.1495	28.2743	22.0994	20.1495
1661	10.8333	16.2499	20.7999	23.0744	16.5746	21.7745	20.4745	28.2743	22.0994	20.1495
1662	11.2666	16.2499	21.0166	23.0744	16.5746	22.0994	20.4745	28.2743	21.7745	20.1495
1663	11.2666	16.4666	21.2333	23.3994	16.2496	22.4244	20.4745	27.9493	21.7745	20.1495
1664	10.6166	16.0333	20.7999	23.0744	16.2496	22.4244	20.4745	28.5993	21.7745	20.4745
1665	10.8333	16.0333	20.7999	23.0744	16.5746	22.0994	20.4745	27.6243	22.0994	20.1495
1666	11.05	16.2499	21.0166	23.0744	16.5746	22.4244	20.7995	27.9493	22.0994	20.1495
1667	11.2666	16.4666	21.0166	23.0744	16.5746	22.4244	20.1495	27.9493	22.0994	20.4745
1668	11.05	16.4666	21.0166	23.0744	16.5746	22.0994	20.4745	27.9493	21.7745	20.1495
1669	11.05	16.2499	21.0166	23.0744	16.5746	22.4244	20.4745	28.2743	22.0994	20.4745
1670	11.05	16.4666	21.0166	23.3994	16.2496	22.7494	20.4745	28.2743	22.0994	20.1495
1671	11.05	16.2499	20.7999	23.0744	16.2496	22.4244	20.4745	28.2743	21.7745	20.4745
1672	10.6166	16.0333	20.7999	23.0744	16.2496	22.4244	20.1495	27.9493	21.7745	20.1495
1673	10.8333	16.2499	20.7999	23.0744	16.2496	22.4244	20.7995	27.9493	22.4244	20.1495
1674	11.05	16.2499	21.0166	23.0744	16.2496	22.4244	20.4745	28.2743	22.0994	19.8245
1675	11.2666	16.2499	21.0166	23.0744	16.2496	22.4244	20.7995	28.2743	22.0994	20.1495
1676	11.05	16.4666	21.2333	23.0744	16.2496	22.4244	20.7995	27.9493	21.7745	19.8245
1677	11.05	16.4666	21.0166	23.0744	16.2496	22.4244	20.1495	28.2743	22.0994	20.4745
1678	11.05	16.2499	21.0166	23.0744	16.2496	22.0994	20.7995	27.6243	22.4244	20.1495
1679	11.2666	16.4666	21.0166	23.3994	16.2496	22.0994	20.4745	27.9493	22.0994	19.8245
1680	11.2666	16.2499	20.7999	23.0744	16.2496	22.4244	20.7995	28.2743	22.0994	19.8245
1681	10.4	16.4666	21.0166	23.0744	16.2496	22.0994	20.1495	27.9493	22.0994	19.8245
1682	10.8333	16.2499	21.0166	23.3994	16.5746	22.0994	20.1495	27.9493	22.0994	20.1495
1683	11.05	16.2499	21.0166	23.3994	16.5746	23.0744	20.4745	27.9493	21.7745	20.1495
1684	10.6166	16.2499	20.7999	23.0744	15.9246	22.4244	20.1495	27.9493	22.0994	20.1495
1685	11.05	16.4666	21.0166	23.0744	16.2496	23.0744	20.1495	27.9493	22.0994	20.4745
1686	10.6166	16.4666	21.0166	23.0744	16.5746	22.7494	20.4745	27.6243	22.7494	20.4745
1687	11.05	16.2499	21.0166	23.3994	16.2496	22.4244	20.7995	28.5993	22.0994	20.1495
1688	10.4	16.0333	21.0166	23.0744	16.2496	22.4244	20.7995	27.6243	22.4244	20.4745
1689	10.6166	16.2499	20.7999	23.0744	16.2496	22.7494	20.7995	27.9493	21.7745	20.4745
1690	10.8333	16.2499	20.7999	23.0744	16.2496	22.0994	20.4745	28.2743	21.7745	20.4745
1691	10.8333	16.2499	21.0166	23.0744	16.2496	22.4244	20.7995	27.6243	21.7745	20.4745
1692	11.7	16.2499	20.7999	23.0744	16.2496	22.4244	20.7995	28.2743	21.7745	20.1495
1693	10.4	16.4666	21.2333	23.3994	16.2496	22.0994	20.7995	27.6243	22.0994	20.4745
1694	10.8333	16.2499	20.7999	23.0744	16.5746	22.4244	20.7995	27.9493	22.0994	20.4745
1695	10.4	16.2499	21.0166	23.0744	16.2496	22.4244	20.7995	28.2743	22.0994	20.4745
1696	10.8333	16.4666	20.7999	23.0744	16.2496	22.4244	20.7995	28.2743	22.0994	20.1495
1697	11.2666	16.2499	20.7999	23.0744	16.5746	22.4244	20.7995	28.2743	22.0994	19.8245
1698	10.8333	16.2499	20.7999	23.3994	16.5746	22.0994	20.7995	27.9493	22.0994	20.1495
1699	11.05	16.2499	20.7999	23.3994	16.2496	22.0994	20.7995	28.5993	22.4244	20.1495
1700	10.4	16.2499	21.0166	23.0744	16.5746	22.7494	21.1245	27.6243	22.0994	20.1495
1701	11.2666	16.2499	20.7999	23.0744	16.5746	22.0994	20.4745	27.6243	22.0994	20.1495
1702	11.4833	16.2499	20.7999	23.0744	16.2496	22.0994	20.7995	27.9493	22.4244	20.1495
1703	10.8333	16.2499	20.7999	23.0744	15.9246	22.4244	20.4745	28.2743	22.0994	19.8245
1704	11.05	16.2499	20.7999	23.0744	16.5746	21.7745	19.8245	28.5993	22.0994	20.1495
1705	10.8333	16.2499	20.7999	23.0744	16.5746	21.7745	20.7995	28.2743	22.0994	20.4745
1706	11.05	16.4666	20.7999	23.0744	16.5746	22.0994	20.4745	27.9493	22.4244	19.8245
1707	11.05	16.2499	20.7999	23.0744	16.2496	22.0994	20.1495	28.2743	21.7745	19.8245
1708	10.6166	16.2499	20.7999	23.0744	16.5746	22.0994	21.1245	27.6243	22.4244	20.1495
1709	11.2666	16.2499	20.7999	23.0744	16.5746	22.0994	20.1495	28.2743	22.4244	20.1495
1710	10.8333	16.4666	21.0166	23.0744	16.2496	21.7745	20.4745	28.5993	22.4244	20.1495
1711	10.6166	16.4666	20.7999	23.0744	16.2496	22.0994	21.1245	28.5993	22.0994	20.1495
1712	10.6166	16.4666	20.7999	23.0744	16.5746	22.0994	19.8245	28.5993	22.0994	19.8245
1713	10.8333	16.2499	20.7999	23.0744	16.5746	21.7745	20.7995	28.5993	22.0994	20.1495
1714	11.4833	16.2499	20.7999	23.0744	16.2496	22.0994	20.7995	27.9493	22.0994	20.1495
1715	11.4833	16.2499	20.7999	23.0744	16.5746	22.0994	21.4495	27.9493	22.4244	20.1495
1716	11.2666	16.2499	20.7999	23.0744	16.5746	22.0994	20.7995	27.9493	22.4244	20.7995
1717	11.2666	16.2499	20.7999	23.0744	16.2496	21.7745	20.7995	28.9243	21.7745	20.4745
1718	10.8333	16.2499	20.7999	23.0744	16.2496	21.7745	20.4745	28.2743	22.0994	20.4745
1719	10.6166	16.0333	21.0166	23.0744	16.5746	21.4495	20.7995	27.2993	22.4244	20.1495
1720	11.05	16.2499	21.0166	23.0744	16.2496	21.7745	20.7995	28.2743	22.7494	20.4745
1721	11.2666	16.2499	21.0166	23.0744	16.2496	22.0994	20.4745	28.2743	21.7745	20.1495
1722	11.4833	16.2499	21.0166	23.0744	16.2496	22.0994	20.4745	28.2743	22.4244	20.1495
1723	10.8333	16.4666	20.7999	23.0744	16.2496	21.7745	20.1495	28.2743	22.0994	20.1495
1724	11.05	16.4666	20.7999	23.0744	16.2496	21.7745	20.4745	27.9493	22.4244	20.1495
1725	11.05	16.0333	20.7999	23.0744	16.2496	21.7745	20.4745	27.6243	22.0994	20.1495
1726	10.8333	16.2499	20.7999	23.0744	16.5746	21.7745	20.7995	28.2743	22.0994	20.1495
1727	11.4833	16.2499	21.2333	23.0744	16.5746	22.0994	20.1495	27.6243	22.7494	20.1495
1728	10.8333	16.2499	21.0166	23.0744	16.2496	22.0994	20.7995	28.2743	22.7494	20.1495
1729	10.8333	16.0333	21.0166	23.0744	16.5746	21.7745	20.4745	27.9493	22.7494	19.8245
1730	10.8333	16.2499	20.7999	23.0744	16.5746	21.7745	20.4745	27.9493	22.7494	19.8245
1731	10.6166	16.2499	21.0166	23.0744	16.8996	22.0994	20.4745	28.2743	22.7494	19.8245
1732	11.05	16.0333	20.7999	23.0744	16.5746	22.0994	20.1495	28.2743	22.4244	19.8245
1733	10.6166	16.4666	21.0166	23.3994	16.2496	21.7745	20.7995	28.9243	22.7494	19.8245
1734	11.05	16.2499	20.7999	23.0744	16.5746	22.0994	20.1495	27.9493	22.0994	19.8245
1735	11.05	16.4666	20.7999	23.0744	16.2496	22.0994	20.1495	28.5993	22.0994	20.1495
1736	11.05	16.0333	20.7999	23.0744	16.8996	22.0994	20.4745	28.2743	22.0994	19.8245
1737	11.4833	16.2499	21.0166	23.0744	16.2496	22.4244	20.4745	28.5993	22.4244	19.8245
1738	10.6166	16.2499	20.7999	23.0744	16.5746	22.4244	20.4745	28.2743	23.0744	19.8245
1739	11.05	16.4666	20.7999	23.0744	16.2496	22.0994	20.4745	28.5993	22.7494	20.1495
1740	10.4	16.0333	20.7999	23.0744	16.2496	22.0994	20.4745	28.5993	22.4244	19.8245
1741	11.05	16.4666	21.0166	23.0744	16.8996	21.4495	20.4745	28.5993	22.0994	19.8245
1742	11.05	16.4666	20.7999	23.0744	16.5746	22.0994	20.7995	28.2743	22.7494	20.1495
1743	11.2666	16.4666	21.0166	23.0744	16.8996	21.7745	20.7995	28.5993	22.7494	20.1495
1744	11.2666	16.4666	20.7999	23.0744	16.5746	21.7745	20.4745	28.2743	22.7494	20.1495
1745	11.05	16.2499	20.7999	23.0744	16.2496	22.0994	20.1495	28.5993	23.0744	20.1495
1746	11.2666	16.2499	20.7999	23.0744	16.5746	21.7745	20.4745	28.5993	23.0744	19.8245
1747	11.05	16.2499	20.7999	23.0744	16.2496	22.0994	20.7995	28.2743	22.7494	20.1495
1748	11.2666	16.2499	20.7999	23.0744	16.2496	22.0994	20.4745	28.2743	22.7494	20.1495
1749	10.8333	16.2499	20.7999	23.0744	16.5746	22.7494	20.4745	28.5993	23.0744	20.1495
1750	10.6166	16.4666	20.7999	23.0744	16.2496	22.0994	20.4745	28.2743	22.4244	20.1495
1751	11.05	16.2499	20.7999	23.3994	16.5746	22.0994	20.7995	27.9493	22.0994	19.8245
1752	11.2666	16.2499	20.7999	23.3994	16.2496	22.7494	19.8245	27.9493	22.4244	20.1495
1753	10.8333	16.2499	20.7999	23.3994	16.2496	22.0994	20.1495	28.2743	22.7494	20.1495
1754	11.05	16.2499	20.7999	23.3994	16.8996	22.0994	19.8245	28.5993	22.4244	20.1495
1755	10.8333	16.4666	20.7999	23.3994	16.5746	21.7745	20.7995	28.5993	22.7494	20.4745
1756	10.8333	16.0333	20.7999	23.3994	16.5746	22.0994	20.4745	27.9493	22.7494	19.8245
1757	11.05	16.2499	20.7999	23.3994	16.2496	22.0994	20.7995	28.2743	22.7494	20.1495
1758	11.05	16.2499	20.7999	23.3994	16.2496	22.0994	20.4745	28.2743	22.4244	20.1495
1759	11.2666	16.2499	20.7999	23.3994	16.2496	22.4244	20.4745	28.2743	22.7494	19.8245
1760	11.2666	16.2499	20.7999	23.3994	16.5746	22.4244	20.7995	28.5993	23.0744	19.8245
1761	10.8333	16.2499	20.7999	23.3994	16.5746	22.4244	20.4745	28.5993	22.4244	19.8245
1762	10.4	16.2499	20.7999	23.3994	16.2496	22.4244	20.7995	28.2743	22.0994	19.4995
1763	10.8333	16.2499	21.0166	23.3994	16.2496	22.4244	20.4745	28.2743	22.7494	19.4995
1764	10.1833	16.2499	20.7999	23.3994	16.2496	22.4244	20.4745	28.5993	23.0744	20.1495
1765	11.2666	16.2499	20.7999	23.3994	16.2496	22.0994	20.4745	28.2743	22.0994	20.1495
1766	10.6166	16.2499	20.7999	23.3994	16.2496	22.4244	20.4745	28.2743	22.7494	20.1495
1767	10.4	16.2499	20.7999	23.3994	16.5746	22.7494	20.4745	27.9493	22.4244	19.8245
1768	10.6166	16.4666	20.7999	23.3994	16.2496	22.4244	20.4745	28.2743	22.7494	19.8245
1769	11.2666	16.2499	20.7999	23.3994	16.2496	22.7494	20.1495	28.2743	22.4244	20.1495
1770	10.8333	16.4666	20.7999	23.3994	16.2496	22.4244	20.4745	28.2743	22.4244	20.1495
1771	11.2666	16.2499	20.7999	23.3994	16.2496	22.4244	20.4745	28.2743	23.0744	20.1495
1772	11.05	16.2499	20.7999	23.3994	16.2496	22.0994	20.7995	28.2743	22.4244	20.1495
1773	11.05	16.0333	20.7999	23.3994	16.2496	22.0994	20.7995	28.2743	23.0744	20.1495
1774	11.4833	16.2499	20.7999	23.3994	16.5746	22.0994	20.4745	28.5993	22.4244	19.8245
1775	11.05	16.2499	20.7999	23.3994	16.2496	22.0994	20.1495	28.9243	23.0744	19.4995
1776	10.8333	16.2499	20.7999	23.3994	16.2496	22.0994	20.1495	28.2743	22.7494	19.8245
1777	10.8333	16.4666	20.5833	23.3994	16.5746	21.7745	20.4745	28.5993	22.7494	19.8245
1778	10.6166	16.2499	20.7999	23.3994	16.5746	22.0994	20.7995	28.2743	22.7494	19.8245
1779	10.8333	16.2499	20.7999	23.3994	16.2496	22.4244	21.1245	28.5993	22.7494	19.8245
1780	10.6166	16.2499	20.7999	23.3994	16.5746	22.0994	20.4745	28.2743	23.3994	19.8245
1781	11.2666	16.2499	20.7999	23.3994	16.5746	21.7745	20.4745	27.9493	23.0744	20.1495
1782	11.05	16.0333	20.7999	23.3994	16.5746	22.0994	20.4745	28.2743	22.7494	19.8245
1783	10.6166	16.4666	21.0166	23.3994	16.8996	21.7745	20.1495	28.2743	22.7494	19.4995
1784	10.6166	16.2499	20.7999	23.3994	16.5746	22.4244	20.1495	28.5993	22.4244	20.1495
1785	10.8333	16.2499	20.7999	23.3994	16.5746	22.0994	20.7995	28.5993	23.3994	20.1495
1786	11.05	16.2499	20.7999	23.3994	16.5746	22.4244	20.1495	27.9493	22.7494	20.1495
1787	11.05	16.2499	20.7999	23.3994	16.2496	22.0994	20.7995	28.5993	23.0744	20.1495
1788	11.05	16.2499	21.0166	23.3994	16.5746	22.0994	20.4745	28.2743	22.4244	19.8245
1789	11.2666	16.2499	21.0166	23.3994	16.5746	21.7745	20.7995	28.2743	22.0994	20.1495
1790	11.05	16.2499	20.7999	23.3994	16.5746	22.0994	20.1495	28.5993	22.4244	20.4745
1791	10.4	16.2499	21.0166	23.3994	16.2496	22.0994	20.7995	28.2743	22.7494	20.1495
1792	10.6166	16.2499	20.7999	23.3994	16.2496	22.0994	21.1245	28.5993	23.0744	20.1495
1793					16.5746	22.4244	20.4745	28.2743	23.0744	20.1495
1794					16.2496	22.4244	20.1495	28.2743	23.3994	20.1495
1795					16.5746	22.4244	20.7995	28.2743	23.0744	20.1495
1796					16.2496	22.7494	21.1245	27.9493	22.7494	19.4995
1797					16.2496	22.4244	21.4495	27.6243	23.3994	19.4995
1798					16.2496	22.7494	20.1495	28.5993	22.7494	19.8245
1799					16.2496	22.7494	20.4745	28.2743	23.0744	20.1495
	BGBV-075_0000	BGBV-106_0000	BGBV-117_0000	BGBV-134_0000	BGBV-253_0000	BGBV-333_0000	BGBV-334_0000	BGBV-355_0000	BGBV-407_0000	BGBV-417_0000
Pulse	10s;20hz;5ms	10s;20hz;5ms	10s;20hz;5ms	10s;20hz;5ms	10s;20hz;5ms	10s;20hz;5ms	10s;20hz;5ms	10s;20hz;5ms	10s;20hz;5ms	10s;20hz;5ms
LED	0.2	0.2	0.2	0.1	0.1	0.1	0.1	0.1	0.1	0.1
Layer	I	I	I	I	I	I	I	I	I	I
Min (ctrl)	12.35	18.6333	21.0166	23.7244	15.9246	22.7494	20.7995	26.3243	23.3994	19.1745
Max (ctrl)	12.7833	19.0666	21.4499	24.3744	16.5746	24.0494	22.0994	27.2993	24.3744	19.8245
Mean (ctrl)	12.5946	18.808	21.2892	24.0599	16.3125	23.0744	21.3736	26.88	24.0704	19.4471
sd (ctrl)	0.165405	0.15238	0.111434	0.102217	0.212605	0.283064	0.27896	0.280744	0.250834	0.147666
1.960*sd	0.324194	0.298665	0.21841	0.200346	0.416705	0.554806	0.546762	0.550259	0.491634	0.289426
2.576*sd	0.426083	0.392531	0.287053	0.263312	0.547669	0.729173	0.718601	0.723197	0.646148	0.380389
t0 (Opto) (sec.)	31	31	31	31	32	33	33	31	32	33
CV	0.013133	0.00810187	0.00523429	0.00424846	0.0130332	0.0122674	0.0130516	0.0104444	0.0104209	0.00759324
Neurovascular response	Vc	Vc	Vc	Vc	Vc-Vd		Vc	Vc-Vd	Vc	Vc-Vd
Onset contraction (3 points) (sec.)
Max-contraction (3 points)
Magnitude contraction (3points)
duration contraction (3 points)
Onset dilation (3 points) (sec.)
Max-dilation (3 points)
Magnitude dilation (3points)
Max-dilatation
Max-contraction
t Max-contraction
DContraction
Contraction K+
Sexe
Age
