# Supplementary material for: Elevated pyramidal cell firing orchestrates arteriolar vasoconstriction through COX-2-derived prostaglandin E2 signaling
Source: eLife. 2025 Apr 23;13:RP102424. doi: 10.7554/eLife.102424 (PMC12017770; doi:10.7554/eLife.102424)
Supplement: Figure 1—source data 1. [file elife-102424-fig1-data1.xls]

## Sheet: Stim 10s-1hz-5ms
	BG095_0008					BG096_0008					BG097_0005					BG100_0005
Time (s)	1	2	3	4	5	1	2	3	4	5	1	2	3	4	5	1	2	3	4	5	Mean	s,e,m,	sem+	sem-
1	1	1	1	1	1	1	1	1	1	1	1	1	1	1	1	1	1	1	1	1	1	0	1	1
2	1	1	1	1	1	1	1	1	1	1	0	1	1	1	1	1	1	1	1	1	0.95	0.0512989	1.0013	0.898701
3	1	1	1	1	1	1	1	1	1	1	1	1	1	1	1	1	1	1	1	1	1	0	1	1
4	1	1	1	1	1	1	1	1	1	1	1	1	1	1	1	1	1	1	1	1	1	0	1	1
5	1	1	1	1	1	1	1	1	1	1	1	1	1	1	1	1	1	1	1	1	1	0	1	1
6	1	1	1	1	1	1	1	1	1	1	1	1	1	1	1	1	1	1	1	1	1	0	1	1
7	1	1	1	1	1	1	1	1	1	1	1	1	1	1	1	1	1	1	1	1	1	0	1	1
8	1	1	1	1	1	1	1	1	1	1	1	1	1	1	1	1	1	1	1	1	1	0	1	1
9	1	1	1	1	1	1	1	1	1	1	1	1	1	1	1	1	1	1	1	1	1	0	1	1
10	1	1	1	1	1	1	1	1	1	1	1	1	1	1	1	1	1	1	1	1	1	0	1	1

## Sheet: Stim 10s-2hz-5ms
	BG095_0007					BG096_0007					BG097_0006					BG100_0004
Time (s)	1	2	3	4	5	1	2	3	4	5	1	2	3	4	5	1	2	3	4	5	Mean	s,e,m,	sem+	sem-
0.5	1	1	1	1	1	1	1	1	1	1	1	1	1	1	1	1	1	1	1	1	1	0	1	1
1	1	1	1	1	1	1	1	1	1	1	0	1	1	1	1	0	1	1	1	1	0.9	0.0706127	0.970613	0.829387
1.5	1	1	1	1	1	1	1	1	1	1	1	1	1	1	1	1	1	1	1	1	1	0	1	1
2	1	1	1	1	1	1	1	1	1	1	1	1	1	1	1	1	1	1	1	1	1	0	1	1
2.5	1	1	1	1	1	1	1	1	1	1	1	1	1	1	1	1	1	1	1	1	1	0	1	1
3	1	1	1	1	1	1	1	1	1	1	1	1	1	1	1	1	1	1	1	1	1	0	1	1
3.5	1	1	1	1	1	1	1	1	1	1	1	1	1	1	1	1	1	1	1	1	1	0	1	1
4	1	1	1	1	1	1	1	1	1	1	1	1	1	1	1	1	1	1	1	1	1	0	1	1
4.5	1	1	1	1	1	1	1	1	1	1	1	1	1	1	1	1	1	1	1	1	1	0	1	1
5	1	1	1	1	1	1	1	1	1	1	1	1	1	1	1	1	1	1	1	1	1	0	1	1
5.5	1	1	1	1	1	1	1	1	1	1	1	1	1	1	1	1	1	1	1	1	1	0	1	1
6	1	1	1	1	1	1	1	1	1	1	1	1	1	1	1	1	1	1	1	1	1	0	1	1
6.5	1	1	1	1	1	1	1	1	1	1	1	1	1	1	1	1	1	1	1	1	1	0	1	1
7	1	1	1	1	1	1	1	1	1	1	1	1	1	1	1	1	1	1	1	1	1	0	1	1
7.5	1	1	1	1	1	1	1	1	1	1	1	1	1	1	1	1	1	1	1	1	1	0	1	1
8	1	1	1	1	1	1	1	1	1	1	1	1	1	1	1	1	1	1	1	1	1	0	1	1
8.5	1	1	1	1	1	1	1	1	1	1	1	1	1	1	1	1	1	1	1	1	1	0	1	1
9	1	1	1	1	1	1	1	1	1	1	1	1	1	1	1	1	1	1	1	1	1	0	1	1
9.5	1	1	1	1	1	1	1	1	1	1	1	1	1	1	1	1	1	1	1	1	1	0	1	1
10	1	1	1	1	1	1	1	1	1	1	1	1	1	1	1	1	1	1	1	1	1	0	1	1

## Sheet: Stim 10s-5hz-5ms
	BG095_0006					BG096_0006					BG097_0007					BG099_0004
Temps (s)	1	2	3	4	5	1	2	3	4	5	1	2	3	4	5	1	2	3	4	5	Mean	s,e,m,	sem+	sem-
0.2	1	1	1	1	1	1	1	1	1	1	1	1	1	1	1	1	1	1	1	1	1	0	1	1
0.4	0	1	1	1	1	0	0	0	0	0	0	0	0	0	0	0	0	0	0	0	0.2	0.0941502	0.29415	0.10585
0.6	1	1	1	1	1	1	1	1	1	2	0	0	0	0	0	0	0	0	0	0	0.55	0.138752	0.688752	0.411248
0.8	1	1	1	1	1	1	1	1	1	1	0	0	0	0	0	0	0	0	0	0	0.5	0.117688	0.617688	0.382312
1	1	1	1	1	1	1	1	1	1	1	1	0	1	0	1	0	0	1	1	1	0.8	0.0941502	0.89415	0.70585
1.2	1	1	1	1	1	1	1	1	1	1	1	1	1	1	1	0	1	1	1	1	0.95	0.0512989	1.0013	0.898701
1.4	1	1	1	1	1	1	1	1	1	1	1	1	1	1	1	0	1	1	1	1	0.95	0.0512989	1.0013	0.898701
1.6	1	1	1	1	1	1	1	1	1	1	1	1	1	1	1	0	1	1	1	1	0.95	0.0512989	1.0013	0.898701
1.8	1	1	1	1	1	1	1	1	1	1	1	1	1	1	1	0	1	1	1	1	0.95	0.0512989	1.0013	0.898701
2	1	1	1	1	1	1	1	1	1	1	1	1	1	1	1	0	1	1	1	1	0.95	0.0512989	1.0013	0.898701
2.2	1	1	1	1	1	1	1	1	1	1	1	1	1	1	1	0	1	1	1	1	0.95	0.0512989	1.0013	0.898701
2.4	1	1	1	1	1	1	1	1	1	1	1	1	1	1	1	1	1	1	1	1	1	0	1	1
2.6	1	1	1	1	1	1	1	1	1	1	1	1	1	1	1	1	1	1	1	1	1	0	1	1
2.8	1	1	1	1	1	1	1	1	1	1	1	1	1	1	1	1	1	1	1	1	1	0	1	1
3	1	1	1	1	1	1	1	1	1	1	1	1	1	1	1	1	1	1	1	1	1	0	1	1
3.2	1	1	1	1	1	1	1	1	1	1	1	1	1	1	1	1	1	1	1	1	1	0	1	1
3.4	1	1	1	1	1	1	1	1	1	1	1	1	1	1	1	1	1	1	1	1	1	0	1	1
3.6	1	1	1	1	1	1	1	1	1	1	1	1	1	1	1	1	1	1	1	1	1	0	1	1
3.8	1	1	1	1	1	1	1	1	1	1	1	1	1	1	1	1	1	1	1	1	1	0	1	1
4	1	1	1	1	1	1	1	1	1	1	1	1	1	1	1	1	1	1	1	1	1	0	1	1
4.2	1	1	1	1	1	1	1	1	1	1	1	1	1	1	1	1	1	1	1	1	1	0	1	1
4.4	1	1	1	1	1	1	1	1	1	1	1	1	1	1	1	1	1	1	1	1	1	0	1	1
4.6	1	1	1	1	1	1	1	1	1	1	1	1	1	1	1	1	1	1	1	1	1	0	1	1
4.8	1	1	1	1	1	1	1	1	1	1	1	1	1	1	1	1	1	1	1	1	1	0	1	1
5	1	1	1	1	1	1	1	1	1	1	1	1	1	1	1	1	1	1	1	1	1	0	1	1
5.2	1	1	1	1	1	1	1	1	1	1	1	1	1	1	1	1	1	1	1	1	1	0	1	1
5.4	1	1	1	1	1	1	1	1	1	1	1	1	1	1	1	1	1	1	1	1	1	0	1	1
5.6	1	1	1	1	1	1	1	1	1	1	1	1	1	1	1	1	1	1	1	1	1	0	1	1
5.8	1	1	1	1	1	1	1	1	1	1	1	1	1	1	1	1	1	1	1	1	1	0	1	1
6	1	1	1	1	1	1	1	1	1	1	1	1	1	1	1	1	1	1	1	1	1	0	1	1
6.2	1	1	1	1	1	1	1	1	1	1	1	1	1	1	1	1	1	1	1	1	1	0	1	1
6.4	1	1	1	1	1	1	1	1	1	1	1	1	1	1	1	1	1	1	1	1	1	0	1	1
6.6	1	1	1	1	1	1	1	1	1	1	1	1	1	1	1	1	1	1	1	1	1	0	1	1
6.8	1	1	1	1	1	1	1	1	1	1	1	1	1	1	1	1	1	1	1	1	1	0	1	1
7	1	1	1	1	1	1	1	1	1	1	1	1	1	1	1	1	1	1	1	1	1	0	1	1
7.2	1	1	1	1	1	1	1	1	1	1	1	1	1	1	1	1	1	1	1	1	1	0	1	1
7.4	1	1	1	1	1	1	1	1	1	1	1	1	1	1	1	1	1	1	1	1	1	0	1	1
7.6	1	1	1	1	1	1	1	1	1	1	1	1	1	1	1	1	1	1	1	1	1	0	1	1
7.8	1	1	1	1	1	1	1	1	1	1	1	1	1	1	1	1	1	1	1	1	1	0	1	1
8	1	1	1	1	1	1	1	1	1	1	1	1	1	1	1	1	1	1	1	1	1	0	1	1
8.2	1	1	1	1	1	1	1	1	1	1	1	1	1	1	1	1	1	1	1	1	1	0	1	1
8.4	1	1	1	1	1	1	1	1	1	1	1	1	1	1	1	1	1	1	1	1	1	0	1	1
8.6	1	1	1	1	1	1	1	1	1	1	1	1	1	1	1	1	1	1	1	1	1	0	1	1
8.8	1	1	1	1	1	1	1	1	1	1	1	1	1	1	1	1	1	1	1	1	1	0	1	1
9	1	1	1	1	1	1	1	1	1	1	1	1	1	1	1	1	1	1	1	1	1	0	1	1
9.2	1	1	1	1	1	1	1	1	1	1	1	1	1	1	1	1	1	1	1	1	1	0	1	1
9.4	1	1	1	1	1	1	1	1	1	1	1	1	1	1	1	1	1	1	1	1	1	0	1	1
9.6	1	1	1	1	1	1	1	1	1	1	1	1	1	1	1	1	1	1	1	1	1	0	1	1
9.8	1	1	1	1	1	1	1	1	1	1	1	1	1	1	1	1	1	1	1	1	1	0	1	1
10	1	1	1	1	1	1	1	1	1	1	1	1	1	1	1	1	1	1	1	1	1	0	1	1

## Sheet: Stim 10s-10hz-5ms
	BG095_0005					BG096_0005					BG097_0008					BG100_0006
Temps (s)	1	2	3	4	5	1	2	3	4	5	1	2	3	4	5	1	2	3	4	5	Mean	s,e,m,	sem+	sem-
0.1	1	1	1	1	1	1	1	1	1	1	1	1	1	1	1	1	1	1	1	1	1	0	1	1
0.2	0	0	0	0	0	0	0	0	0	0	0	0	0	0	0	1	0	0	0	0	0.05	0.0512989	0.101299	-0.00129892
0.3	0	0	0	0	0	0	0	0	0	0	0	0	0	0	0	1	0	0	1	1	0.15	0.0840459	0.234046	0.0659541
0.4	0	0	0	1	1	0	0	0	0	0	0	0	0	0	0	0	1	1	1	1	0.3	0.107863	0.407863	0.192137
0.5	0	0	1	1	1	0	1	1	1	1	0	0	0	0	0	1	1	1	1	1	0.6	0.11531	0.71531	0.48469
0.6	0	1	1	1	1	1	1	1	1	1	0	0	0	0	0	1	1	1	1	1	0.7	0.107863	0.807863	0.592137
0.7	0	1	1	1	1	1	1	1	1	1	0	0	0	0	0	1	1	1	1	1	0.7	0.107863	0.807863	0.592137
0.8	1	1	1	1	1	1	1	1	1	1	0	0	0	0	0	1	1	1	1	1	0.75	0.101921	0.851921	0.648079
0.9	1	1	1	1	1	1	1	1	1	1	0	0	0	0	0	1	1	1	1	1	0.75	0.101921	0.851921	0.648079
1	1	1	1	1	1	1	1	1	1	1	0	0	0	0	0	1	1	1	1	1	0.75	0.101921	0.851921	0.648079
1.1	1	1	1	1	1	1	1	1	1	1	0	0	0	0	0	1	1	1	1	1	0.75	0.101921	0.851921	0.648079
1.2	1	1	1	1	1	1	1	1	1	1	0	0	0	0	0	1	1	1	1	1	0.75	0.101921	0.851921	0.648079
1.3	1	1	1	1	1	1	1	1	1	1	0	0	0	1	0	1	1	1	1	1	0.8	0.0941502	0.89415	0.70585
1.4	1	1	1	1	1	1	1	1	1	1	0	1	1	1	1	1	1	1	1	1	0.95	0.0512989	1.0013	0.898701
1.5	1	1	1	1	1	1	1	1	1	1	0	0	0	1	0	1	1	1	1	1	0.8	0.0941502	0.89415	0.70585
1.6	1	1	1	1	1	1	1	1	1	1	0	0	1	1	1	1	1	1	1	1	0.9	0.0706127	0.970613	0.829387
1.7	1	1	1	1	1	1	1	1	1	1	1	0	0	0	1	1	1	1	1	1	0.85	0.0840459	0.934046	0.765954
1.8	1	1	1	1	1	1	1	1	1	1	0	1	0	1	0	1	1	1	1	1	0.85	0.0840459	0.934046	0.765954
1.9	1	1	1	1	1	1	1	1	1	1	1	0	1	0	1	1	1	1	1	1	0.9	0.0706127	0.970613	0.829387
2	1	1	1	1	1	1	1	1	1	1	0	1	1	0	1	1	1	1	1	1	0.9	0.0706127	0.970613	0.829387
2.1	1	1	1	1	1	1	1	1	1	1	1	1	0	1	1	1	1	1	1	1	0.95	0.0512989	1.0013	0.898701
2.2	1	1	1	1	1	1	1	1	1	1	0	0	1	1	1	1	1	1	1	1	0.9	0.0706127	0.970613	0.829387
2.3	1	1	1	1	1	1	1	1	1	1	0	1	0	1	0	1	1	1	1	1	0.85	0.0840459	0.934046	0.765954
2.4	1	1	1	1	1	1	1	1	1	1	0	0	1	0	1	1	1	1	1	1	0.85	0.0840459	0.934046	0.765954
2.5	1	1	1	1	1	1	1	1	1	1	1	1	1	1	1	1	1	1	1	1	1	0	1	1
2.6	1	1	1	1	1	1	1	1	1	1	1	0	1	1	1	1	1	1	1	1	0.95	0.0512989	1.0013	0.898701
2.7	1	1	1	1	1	1	1	1	1	1	1	0	1	0	1	1	1	1	1	1	0.9	0.0706127	0.970613	0.829387
2.8	1	1	1	1	1	1	1	1	1	1	1	1	1	1	1	1	1	1	1	1	1	0	1	1
2.9	1	1	1	1	1	1	1	1	1	1	1	1	1	1	0	1	1	1	1	1	0.95	0.0512989	1.0013	0.898701
3	1	1	1	1	1	1	1	1	1	1	1	1	0	0	0	1	1	1	1	1	0.85	0.0840459	0.934046	0.765954
3.1	1	1	1	1	1	1	1	1	1	1	1	1	1	1	1	1	1	1	1	1	1	0	1	1
3.2	1	1	1	1	1	1	1	1	1	1	1	1	0	1	1	1	1	1	1	1	0.95	0.0512989	1.0013	0.898701
3.3	1	1	1	1	1	1	1	1	1	1	1	1	1	0	1	1	1	1	1	1	0.95	0.0512989	1.0013	0.898701
3.4	1	1	1	1	1	1	1	1	1	1	1	1	1	1	1	1	1	1	1	1	1	0	1	1
3.5	1	1	1	1	1	1	1	1	1	1	1	1	0	0	0	1	1	1	1	1	0.85	0.0840459	0.934046	0.765954
3.6	1	1	1	1	1	1	1	1	1	1	1	0	1	1	1	1	1	1	1	1	0.95	0.0512989	1.0013	0.898701
3.7	1	1	1	1	1	1	1	1	1	1	1	1	1	0	0	1	1	1	1	1	0.9	0.0706127	0.970613	0.829387
3.8	1	1	1	1	1	1	1	1	1	1	1	1	1	1	1	1	1	1	1	1	1	0	1	1
3.9	1	1	1	1	1	1	1	1	1	1	1	1	0	1	1	1	1	1	1	1	0.95	0.0512989	1.0013	0.898701
4	1	1	1	1	1	1	1	1	1	1	0	0	1	0	0	1	1	1	1	0	0.75	0.101921	0.851921	0.648079
4.1	1	1	1	1	1	1	1	1	1	1	1	1	1	1	1	1	1	1	0	1	0.95	0.0512989	1.0013	0.898701
4.2	1	1	1	1	1	1	1	1	1	1	0	1	0	0	0	1	1	0	1	1	0.75	0.101921	0.851921	0.648079
4.3	1	1	1	1	1	1	1	1	1	1	1	1	1	1	1	1	1	1	1	1	1	0	1	1
4.4	1	1	1	1	1	1	1	1	1	1	0	1	0	1	0	1	1	1	1	1	0.85	0.0840459	0.934046	0.765954
4.5	1	1	1	1	1	1	1	1	1	1	1	0	1	1	1	1	1	1	1	1	0.95	0.0512989	1.0013	0.898701
4.6	1	1	1	1	1	1	1	1	1	1	1	1	0	0	1	1	0	1	0	1	0.8	0.0941502	0.89415	0.70585
4.7	1	1	1	1	1	1	1	1	1	1	1	1	1	1	0	1	1	1	1	1	0.95	0.0512989	1.0013	0.898701
4.8	1	1	1	1	1	1	1	1	1	1	1	0	1	1	1	1	1	1	1	0	0.9	0.0706127	0.970613	0.829387
4.9	1	1	1	1	1	1	1	1	1	1	1	1	1	1	1	1	1	1	1	1	1	0	1	1
5	1	1	1	1	1	1	1	1	1	1	0	1	0	0	1	1	0	0	0	0	0.65	0.112267	0.762267	0.537733
5.1	1	1	1	1	1	1	1	1	1	1	1	0	1	1	1	1	1	1	0	0	0.85	0.0840459	0.934046	0.765954
5.2	1	1	1	1	1	1	1	1	1	1	0	1	1	0	0	1	1	0	0	1	0.75	0.101921	0.851921	0.648079
5.3	1	1	1	1	1	1	1	1	1	1	1	1	0	1	0	1	1	0	1	1	0.85	0.0840459	0.934046	0.765954
5.4	1	1	1	1	1	1	1	1	1	1	1	1	0	1	1	1	1	1	0	1	0.9	0.0706127	0.970613	0.829387
5.5	1	1	1	1	1	1	1	1	1	1	0	1	1	1	1	1	1	0	1	1	0.9	0.0706127	0.970613	0.829387
5.6	1	1	1	1	1	1	1	1	1	1	1	0	1	0	1	1	1	1	1	1	0.9	0.0706127	0.970613	0.829387
5.7	1	1	1	1	1	1	1	1	1	1	0	1	1	1	0	0	1	0	1	0	0.75	0.101921	0.851921	0.648079
5.8	1	1	1	1	1	1	1	1	1	1	1	0	1	0	1	1	0	0	0	1	0.75	0.101921	0.851921	0.648079
5.9	1	1	0	1	1	1	1	1	1	1	1	1	0	1	0	1	1	1	1	1	0.85	0.0840459	0.934046	0.765954
6	1	1	1	1	1	1	1	1	1	1	0	1	1	1	1	1	0	1	1	0	0.85	0.0840459	0.934046	0.765954
6.1	1	1	1	1	1	1	1	1	1	1	1	0	1	1	0	1	1	0	1	0	0.8	0.0941502	0.89415	0.70585
6.2	1	1	1	1	1	1	1	1	1	1	1	1	0	1	0	1	0	1	0	0	0.75	0.101921	0.851921	0.648079
6.3	1	1	1	1	1	1	1	1	1	1	1	1	0	0	1	1	1	1	0	1	0.85	0.0840459	0.934046	0.765954
6.4	1	1	1	1	1	1	1	1	1	1	1	0	1	1	1	1	1	0	1	0	0.85	0.0840459	0.934046	0.765954
6.5	1	1	1	1	1	1	1	1	1	1	0	1	1	1	1	1	0	1	0	1	0.85	0.0840459	0.934046	0.765954
6.6	1	1	1	0	1	1	1	1	1	1	1	1	0	1	1	1	0	1	1	0	0.8	0.0941502	0.89415	0.70585
6.7	1	1	1	1	1	1	1	1	1	1	1	1	0	1	1	1	1	0	0	1	0.85	0.0840459	0.934046	0.765954
6.8	1	1	1	1	0	1	1	1	1	1	1	1	1	1	1	1	1	1	0	0	0.85	0.0840459	0.934046	0.765954
6.9	1	1	1	1	1	1	1	1	1	1	0	0	0	1	1	0	0	0	1	0	0.65	0.112267	0.762267	0.537733
7	1	1	1	1	1	1	1	1	1	1	1	1	1	0	0	1	1	1	0	0	0.8	0.0941502	0.89415	0.70585
7.1	1	1	1	1	1	1	1	1	1	1	1	0	1	1	1	1	0	0	1	1	0.85	0.0840459	0.934046	0.765954
7.2	1	1	1	1	0	1	1	1	1	1	1	1	1	0	0	1	1	1	0	0	0.75	0.101921	0.851921	0.648079
7.3	1	0	0	1	1	1	1	1	1	1	1	0	1	1	1	1	1	1	1	1	0.85	0.0840459	0.934046	0.765954
7.4	1	1	1	1	1	1	1	1	1	1	0	1	1	1	1	0	1	0	0	1	0.8	0.0941502	0.89415	0.70585
7.5	1	1	1	1	0	1	1	1	1	1	1	1	0	1	1	1	0	0	1	0	0.75	0.101921	0.851921	0.648079
7.6	1	1	1	1	1	1	1	1	1	1	1	1	1	1	0	0	1	1	0	0	0.8	0.0941502	0.89415	0.70585
7.7	1	1	1	1	1	1	1	1	1	1	0	1	0	1	1	1	0	0	1	1	0.8	0.0941502	0.89415	0.70585
7.8	1	1	1	1	1	1	1	1	1	1	1	0	1	0	1	1	1	1	0	0	0.8	0.0941502	0.89415	0.70585
7.9	1	1	1	1	1	1	1	1	1	1	0	1	0	0	1	1	1	0	0	1	0.75	0.101921	0.851921	0.648079
8	1	0	1	1	0	1	1	1	1	1	1	1	1	1	0	1	0	0	1	0	0.7	0.107863	0.807863	0.592137
8.1	1	1	1	1	1	1	1	1	1	1	1	0	0	0	0	1	1	1	0	0	0.7	0.107863	0.807863	0.592137
8.2	1	1	0	1	1	1	1	1	1	1	1	1	1	0	1	1	1	1	1	1	0.9	0.0706127	0.970613	0.829387
8.3	1	1	1	1	1	1	1	1	1	1	0	1	1	1	1	1	0	1	0	0	0.8	0.0941502	0.89415	0.70585
8.4	1	1	1	1	1	1	1	1	1	1	1	1	0	0	0	1	0	0	1	1	0.75	0.101921	0.851921	0.648079
8.5	1	1	1	1	1	1	1	1	1	1	1	1	1	1	1	1	0	1	1	0	0.9	0.0706127	0.970613	0.829387
8.6	1	1	1	0	0	1	1	1	1	1	0	1	1	1	1	0	1	1	1	0	0.75	0.101921	0.851921	0.648079
8.7	0	1	1	1	1	1	1	1	1	1	1	0	1	0	0	0	0	1	0	0	0.6	0.11531	0.71531	0.48469
8.8	1	1	1	1	0	1	1	1	1	1	1	1	1	1	0	1	1	0	1	0	0.8	0.0941502	0.89415	0.70585
8.9	1	1	1	1	1	1	1	1	1	1	1	1	1	0	1	1	0	1	1	1	0.9	0.0706127	0.970613	0.829387
9	1	1	1	1	1	1	1	1	1	1	1	1	1	1	1	1	1	1	0	1	0.95	0.0512989	1.0013	0.898701
9.1	1	1	0	1	1	1	1	1	1	1	0	0	1	0	0	0	0	0	1	1	0.6	0.11531	0.71531	0.48469
9.2	1	1	1	1	0	1	1	1	1	1	1	1	0	1	1	1	1	0	0	1	0.8	0.0941502	0.89415	0.70585
9.3	1	1	1	1	1	1	1	1	1	1	1	0	1	1	1	1	0	0	0	0	0.75	0.101921	0.851921	0.648079
9.4	1	1	1	0	0	1	1	1	1	1	1	1	1	1	0	1	1	1	0	0	0.75	0.101921	0.851921	0.648079
9.5	1	0	1	0	1	1	1	1	1	1	0	1	0	0	0	1	1	1	1	1	0.7	0.107863	0.807863	0.592137
9.6	1	1	0	1	1	1	1	1	1	1	1	0	1	1	1	0	0	0	0	0	0.65	0.112267	0.762267	0.537733
9.7	1	1	1	0	1	1	1	1	1	1	1	1	0	1	1	0	1	1	1	1	0.85	0.0840459	0.934046	0.765954
9.8	1	1	0	1	0	1	1	1	1	1	1	1	0	1	0	1	0	0	0	1	0.65	0.112267	0.762267	0.537733
9.9	1	1	1	1	1	1	1	1	1	1	1	0	1	0	1	1	1	1	1		0.894737	0.0743173	0.969054	0.82042
10	1	1	1	1	1	1	1	1	1	1	1	1	0	0	1	0	1	0	0	0	0.7	0.107863	0.807863	0.592137

## Sheet: Stim 10s-20hz-5ms
	BG-056_0008	BG-056_0009				BG-057_0008					BG-095_0004					BG-096_0004
Time (s)	1	1	2	3	4	1	2	3	4	5	1	2	3	4	5	1	2	3	4	5	Mean	s,e,m,	sem+	sem-
0.05	1	1	1	1	1	1	1	1	1	1	1	1	1	1	1	1	1	2	1	1	1.05	0.0512989	1.1013	0.998701
0.1	1	1	1	1	1	1	1	1	1	1	0	0	0	0	0	0	0	0	0	0	0.5	0.117688	0.617688	0.382312
0.15	1	1	1	1	1	1	1	1	1	1	1	0	0	0	0	0	0	0	0	0	0.55	0.117098	0.667098	0.432902
0.2	1	1	1	1	1	1	1	1	1	1	0	0	0	0	0	0	0	0	0	0	0.5	0.117688	0.617688	0.382312
0.25	1	1	1	1	1	1	1	1	1	1	0	0	0	0	0	0	0	0	0	0	0.5	0.117688	0.617688	0.382312
0.3	1	1	1	1	1	1	1	1	1	1	0	0	0	0	0	0	0	0	0	0	0.5	0.117688	0.617688	0.382312
0.35	1	1	1	1	1	1	1	1	1	1	0	0	0	0	0	0	0	0	0	0	0.5	0.117688	0.617688	0.382312
0.4	1	1	1	1	1	1	1	1	1	0	0	0	0	0	0	0	0	0	0	0	0.45	0.117098	0.567098	0.332902
0.45	1	1	1	1	1	1	1	1	1	1	0	0	1	1	1	0	1	0	1	0	0.75	0.101921	0.851921	0.648079
0.5	1	1	1	1	1	1	1	1	1	1	0	0	1	0	0	0	1	1	1	1	0.75	0.101921	0.851921	0.648079
0.55	1	1	1	1	1	1	1	1	1	1	0	1	0	0	0	0	1	1	1	1	0.75	0.101921	0.851921	0.648079
0.6	1	1	1	1	1	1	1	1	1	1	0	0	0	0	0	0	1	1	1	1	0.7	0.107863	0.807863	0.592137
0.65	1	1	1	1	1	1	1	1	1	1	0	0	0	0	1	0	1	1	1	1	0.75	0.101921	0.851921	0.648079
0.7	1	1	1	1	1	1	1	1	1	1	0	1	0	0	0	0	1	1	1	1	0.75	0.101921	0.851921	0.648079
0.75	1	1	1	1	1	1	1	1	1	1	0	0	0	1	1	0	1	1	1	1	0.8	0.0941502	0.89415	0.70585
0.8	1	1	1	1	1	1	1	1	1	1	0	1	1	0	0	0	1	1	1	1	0.8	0.0941502	0.89415	0.70585
0.85	1	1	1	1	1	1	1	1	1	1	0	0	0	1	0	0	1	1	1	1	0.75	0.101921	0.851921	0.648079
0.9	1	1	1	1	1	1	1	1	1	1	0	1	0	0	0	1	1	1	1	1	0.8	0.0941502	0.89415	0.70585
0.95	1	1	1	1	1	1	1	1	1	1	0	1	1	1	0	1	1	1	1	1	0.9	0.0706127	0.970613	0.829387
1	1	1	1	1	1	1	1	1	1	0	0	1	0	0	1	1	1	1	1	1	0.8	0.0941502	0.89415	0.70585
1.05	1	1	1	1	1	1	1	1	1	1	0	1	1	1	0	1	1	1	1	1	0.9	0.0706127	0.970613	0.829387
1.1	1	1	1	1	1	1	1	1	1	1	1	0	1	1	1	1	1	1	1	1	0.95	0.0512989	1.0013	0.898701
1.15	1	1	1	1	1	1	1	1	1	1	0	1	0	1	0	1	1	1	1	1	0.85	0.0840459	0.934046	0.765954
1.2	1	1	1	1	1	1	1	1	0	0	0	0	1	0	1	1	1	1	1	1	0.75	0.101921	0.851921	0.648079
1.25	1	1	1	1	1	1	1	1	1	1	0	1	0	0	0	1	1	1	1	1	0.8	0.0941502	0.89415	0.70585
1.3	1	1	1	1	1	1	1	1	0	1	1	1	1	1	1	1	1	1	1	1	0.95	0.0512989	1.0013	0.898701
1.35	1	1	1	1	1	1	1	0	1	1	0	0	0	0	0	1	1	1	1	1	0.7	0.107863	0.807863	0.592137
1.4	1	1	1	1	1	1	1	1	1	0	1	1	1	1	0	1	1	1	1	1	0.9	0.0706127	0.970613	0.829387
1.45	1	1	1	1	1	1	1	1	1	1	0	0	0	0	1	1	1	1	1	1	0.8	0.0941502	0.89415	0.70585
1.5	1	1	1	1	1	1	1	0	0	0	1	1	1	1	0	1	1	1	1	1	0.8	0.0941502	0.89415	0.70585
1.55	1	1	1	1	1	1	1	1	1	1	0	0	0	0	1	1	1	1	1	1	0.8	0.0941502	0.89415	0.70585
1.6	1	1	1	1	1	1	1	1	1	0	1	1	1	1	0	1	1	1	1	1	0.9	0.0706127	0.970613	0.829387
1.65	0	1	1	1	1	1	1	0	0	1	0	1	0	0	0	1	1	1	1	1	0.65	0.112267	0.762267	0.537733
1.7	1	1	1	1	1	1	0	1	1	0	1	0	1	0	1	1	1	1	1	1	0.8	0.0941502	0.89415	0.70585
1.75	1	1	1	1	1	1	1	0	1	1	0	1	0	1	0	1	1	1	1	1	0.8	0.0941502	0.89415	0.70585
1.8	1	1	1	1	1	1	1	1	0	0	0	0	1	0	1	1	1	1	1	1	0.75	0.101921	0.851921	0.648079
1.85	1	1	1	1	1	1	0	1	1	1	1	1	0	0	0	1	1	1	1	1	0.8	0.0941502	0.89415	0.70585
1.9	0	1	1	1	1	1	1	0	0	0	1	0	1	1	0	1	1	1	1	1	0.7	0.107863	0.807863	0.592137
1.95	1	1	1	1	1	0	1	1	1	1	0	1	0	0	1	1	1	1	1	1	0.8	0.0941502	0.89415	0.70585
2	0	0	1	1	1	1	0	0	0	0	1	0	1	1	0	1	1	1	1	1	0.6	0.11531	0.71531	0.48469
2.05	1	1	1	1	0	1	1	1	1	1	0	1	0	0	0	1	1	1	1	1	0.75	0.101921	0.851921	0.648079
2.1	1	1	0	1	1	0	0	0	0	0	1	0	0	0	0	1	1	1	1	1	0.5	0.117688	0.617688	0.382312
2.15	1	1	1	1	1	1	1	1	1	1	0	1	1	0	0	1	1	1	1	1	0.85	0.0840459	0.934046	0.765954
2.2	1	1	1	0	1	1	1	0	0	0	1	0	0	1	0	1	1	1	1	1	0.65	0.112267	0.762267	0.537733
2.25	0	0	1	1	1	0	0	1	1	1	0	1	1	0	0	1	1	1	1	1	0.65	0.112267	0.762267	0.537733
2.3	1	1	0	1	1	1	1	0	0	0	1	0	0	0	0	1	1	1	1	1	0.6	0.11531	0.71531	0.48469
2.35	1	1	1	1	1	1	0	1	1	1	1	1	1	1	1	1	1	1	1	1	0.95	0.0512989	1.0013	0.898701
2.4	0	0	0	0	1	0	1	0	0	0	1	0	0	0	0	1	1	1	1	1	0.4	0.11531	0.51531	0.28469
2.45	1	1	1	1	1	1	0	1	1	1	0	1	1	0	0	1	1	1	1	1	0.8	0.0941502	0.89415	0.70585
2.5	1	0	1	1	0	0	1	0	0	0	1	0	0	0	0	1	1	1	1	1	0.5	0.117688	0.617688	0.382312
2.55	0	1	0	1	1	1	0	1	1	1	0	1	0	1	0	1	1	1	1	1	0.7	0.107863	0.807863	0.592137
2.6	1	1	1	0	1	0	1	0	0	0	1	0	1	0	0	1	1	1	1	1	0.6	0.11531	0.71531	0.48469
2.65	0	0	1	1	1	1	0	1	1	1	1	0	0	1	1	1	1	1	1	1	0.75	0.101921	0.851921	0.648079
2.7	1	1	1	1	1	1	1	0	0	0	1	1	1	0	0	1	1	1	1	1	0.75	0.101921	0.851921	0.648079
2.75	1	1	0	1	0	0	0	1	1	1	0	0	0	0	0	1	1	1	1	1	0.55	0.117098	0.667098	0.432902
2.8	0	1	1	1	1	1	1	0	0	0	1	0	0	0	1	1	1	1	1	1	0.65	0.112267	0.762267	0.537733
2.85	1	0	1	0	1	0	1	1	1	1	0	1	0	0	0	1	1	1	1	1	0.65	0.112267	0.762267	0.537733
2.9	1	1	0	1	1	1	0	0	0	0	1	0	1	0	0	1	1	1	1	1	0.6	0.11531	0.71531	0.48469
2.95	0	1	1	1	0	0	1	1	1	1	0	1	0	1	1	1	1	1	1	1	0.75	0.101921	0.851921	0.648079
3	1	0	1	0	1	1	0	0	0	0	1	0	0	0	0	1	1	1	1	1	0.5	0.117688	0.617688	0.382312
3.05	1	1	0	1	1	0	1	1	1	1	0	0	1	0	0	1	1	1	1	1	0.7	0.107863	0.807863	0.592137
3.1	0	0	1	1	1	1	0	0	0	0	1	1	0	0	0	1	1	1	1	1	0.55	0.117098	0.667098	0.432902
3.15	1	1	1	0	0	0	1	1	1	1	0	0	0	0	0	1	1	1	1	1	0.6	0.11531	0.71531	0.48469
3.2	1	1	1	1	1	1	0	0	0	0	1	0	1	0	0	1	1	1	1	1	0.65	0.112267	0.762267	0.537733
3.25	0	0	0	1	1	0	1	1	1	1	0	0	0	1	1	1	1	1	1	1	0.65	0.112267	0.762267	0.537733
3.3	1	1	1	1	1	1	1	0	0	0	1	1	0	0	0	1	1	1	1	1	0.7	0.107863	0.807863	0.592137
3.35	0	0	1	0	0	0	0	1	1	1	0	0	0	0	0	1	1	1	1	1	0.45	0.117098	0.567098	0.332902
3.4	1	1	0	1	1	1	1	0	0	0	1	0	1	1	0	1	1	1	1	1	0.7	0.107863	0.807863	0.592137
3.45	1	0	1	1	0	0	0	1	1	1	0	1	0	0	1	1	1	1	1	1	0.65	0.112267	0.762267	0.537733
3.5	0	1	1	0	1	1	1	0	0	0	1	0	0	0	0	1	1	1	0	1	0.5	0.117688	0.617688	0.382312
3.55	1	0	1	1	1	0	0	1	1	1	0	0	0	0	0	1	1	1	1	1	0.6	0.11531	0.71531	0.48469
3.6	0	1	0	1	1	1	1	0	0	0	1	0	0	0	0	1	1	1	1	1	0.55	0.117098	0.667098	0.432902
3.65	1	0	1	0	0	0	0	1	1	1	0	1	1	0	0	1	1	1	1	1	0.6	0.11531	0.71531	0.48469
3.7	1	1	0	1	1	1	1	0	0	0	1	0	0	0	0	1	1	1	1	1	0.6	0.11531	0.71531	0.48469
3.75	0	1	1	1	1	0	0	1	1	1	0	0	0	0	0	1	1	1	1	1	0.6	0.11531	0.71531	0.48469
3.8	1	0	0	1	0	1	1	0	0	0	1	1	0	0	0	1	1	1	1	1	0.55	0.117098	0.667098	0.432902
3.85	0	1	1	0	1	0	0	1	1	1	0	0	1	0	0	1	1	1	1	1	0.6	0.11531	0.71531	0.48469
3.9	1	1	0	1	0	1	1	0	0	0	1	0	0	0	0	1	1	1	1	0	0.5	0.117688	0.617688	0.382312
3.95	0	0	1	0	1	0	0	1	1	0	0	1	0	1	0	1	1	1	0	1	0.5	0.117688	0.617688	0.382312
4	1	1	1	1	0	1	1	0	0	1	1	0	0	0	0	1	1	1	1	1	0.65	0.112267	0.762267	0.537733
4.05	0	0	0	1	1	1	0	1	1	0	0	0	0	0	1	1	1	1	1	1	0.55	0.117098	0.667098	0.432902
4.1	1	1	1	0	0	0	1	0	0	1	1	0	0	0	0	1	1	1	1	1	0.55	0.117098	0.667098	0.432902
4.15	0	0	0	1	1	1	0	1	1	0	0	1	0	1	0	1	1	1	1	1	0.6	0.11531	0.71531	0.48469
4.2	1	1	1	0	1	0	1	0	0	1	1	0	1	0	0	1	1	1	0	1	0.6	0.11531	0.71531	0.48469
4.25	0	0	0	1	0	1	0	1	1	0	0	0	0	0	0	1	1	1	1	1	0.45	0.117098	0.567098	0.332902
4.3	1	1	1	0	1	0	1	0	0	1	1	0	0	0	0	1	1	1	1	1	0.6	0.11531	0.71531	0.48469
4.35	0	0	0	1	0	1	0	1	1	0	0	0	0	0	0	1	1	1	1	1	0.45	0.117098	0.567098	0.332902
4.4	1	1	1	1	1	0	1	0	0	1	1	1	1	0	0	1	1	1	0	0	0.65	0.112267	0.762267	0.537733
4.45	0	0	1	0	0	1	0	1	1	0	0	0	0	1	0	1	1	1	1	1	0.5	0.117688	0.617688	0.382312
4.5	1	1	0	1	1	1	1	0	0	1	1	0	0	0	0	1	1	1	1	1	0.65	0.112267	0.762267	0.537733
4.55	0	0	1	0	1	0	0	1	1	0	0	1	0	0	0	1	0	1	1	1	0.45	0.117098	0.567098	0.332902
4.6	1	1	0	1	0	1	1	0	0	1	1	0	0	0	0	1	1	1	1	1	0.6	0.11531	0.71531	0.48469
4.65	0	1	1	0	1	0	0	1	1	0	0	1	1	0	0	1	1	1	1	0	0.55	0.117098	0.667098	0.432902
4.7	1	0	0	1	1	1	1	0	0	0	1	0	0	0	0	1	1	1	1	1	0.55	0.117098	0.667098	0.432902
4.75	0	1	1	1	0	0	0	1	1	1	0	0	0	0	0	1	1	1	1	1	0.55	0.117098	0.667098	0.432902
4.8	1	0	0	0	1	1	1	0	0	0	1	0	1	0	0	1	1	1	0	0	0.45	0.117098	0.567098	0.332902
4.85	0	1	1	1	0	0	0	1	1	1	0	0	0	0	0	1	1	1	1	1	0.55	0.117098	0.667098	0.432902
4.9	1	0	1	0	1	1	1	0	0	0	1	1	0	0	0	1	1	0	1	1	0.55	0.117098	0.667098	0.432902
4.95	0	1	0	1	1	0	0	1	1	0	0	0	0	0	0	1	1	1	1	1	0.5	0.117688	0.617688	0.382312
5	1	0	1	0	0	1	1	0	0	1	1	0	1	0	1	1	1	1	0	1	0.6	0.11531	0.71531	0.48469
5.05	0	1	0	1	1	0	0	1	1	0	0	0	0	0	0	1	1	1	1	0	0.45	0.117098	0.567098	0.332902
5.1	1	0	1	1	1	1	1	0	0	1	1	1	0	0	0	1	1	1	1	1	0.7	0.107863	0.807863	0.592137
5.15	0	1	1	0	0	0	0	1	0	0	0	0	0	1	0	1	1	1	1	1	0.45	0.117098	0.567098	0.332902
5.2	1	0	0	1	1	1	1	0	1	1	1	0	1	0	1	1	1	0	1	0	0.65	0.112267	0.762267	0.537733
5.25	1	1	1	0	0	0	0	1	0	0	0	1	0	0	0	1	1	1	1	1	0.5	0.117688	0.617688	0.382312
5.3	0	0	1	1	1	1	1	0	1	1	1	0	0	0	0	1	1	1	1	1	0.65	0.112267	0.762267	0.537733
5.35	1	1	0	0	0	0	0	1	0	0	0	0	0	0	0	1	1	1	0	1	0.35	0.112267	0.462267	0.237733
5.4	0	0	1	1	1	1	1	0	1	1	1	1	0	0	0	1	1	0	1	1	0.65	0.112267	0.762267	0.537733
5.45	1	1	0	0	1	0	0	1	0	0	0	0	0	0	0	1	1	1	1	1	0.45	0.117098	0.567098	0.332902
5.5	0	1	1	1	0	1	1	0	1	1	1	0	0	1	0	1	1	1	1	0	0.65	0.112267	0.762267	0.537733
5.55	1	0	0	0	1	0	0	1	0	0	0	0	1	0	0	1	1	1	0	1	0.4	0.11531	0.51531	0.28469
5.6	0	1	1	1	1	1	1	0	1	1	1	0	0	0	0	1	1	1	1	1	0.7	0.107863	0.807863	0.592137
5.65	1	0	0	1	0	1	0	1	0	0	0	1	0	0	0	1	1	1	1	0	0.45	0.117098	0.567098	0.332902
5.7	0	1	1	0	1	0	1	0	1	1	1	0	1	0	0	1	1	0	1	1	0.6	0.11531	0.71531	0.48469
5.75	1	0	0	1	0	1	0	1	0	0	0	0	0	0	1	1	1	1	1	1	0.5	0.117688	0.617688	0.382312
5.8	0	1	1	0	1	1	1	0	1	1	1	1	0	0	0	1	1	1	1	1	0.7	0.107863	0.807863	0.592137
5.85	1	0	0	1	0	0	0	1	0	0	0	0	0	1	0	1	1	1	0	1	0.4	0.11531	0.51531	0.28469
5.9	0	1	1	0	1	1	1	0	1	0	0	0	1	0	0	0	1	1	1	0	0.5	0.117688	0.617688	0.382312
5.95	1	0	0	1	0	0	0	1	0	1	1	0	0	0	0	1	0	1	1	1	0.45	0.117098	0.567098	0.332902
6	0	1	1	0	1	1	1	0	1	0	0	0	0	0	0	1	1	1	1	0	0.5	0.117688	0.617688	0.382312
6.05	1	0	0	1	1	0	0	1	0	1	1	1	0	0	1	1	1	1	0	1	0.6	0.11531	0.71531	0.48469
6.1	0	1	1	0	0	1	1	0	1	0	0	0	0	0	0	1	0	1	1	1	0.45	0.117098	0.567098	0.332902
6.15	1	0	0	1	1	0	0	1	0	1	0	0	0	0	0	1	1	0	1	1	0.45	0.117098	0.567098	0.332902
6.2	0	1	1	0	0	1	1	0	1	0	1	0	0	0	0	1	1	1	1	1	0.55	0.117098	0.667098	0.432902
6.25	1	0	0	1	1	0	0	1	0	1	0	0	0	0	0	1	1	1	1	0	0.45	0.117098	0.567098	0.332902
6.3	0	1	1	0	0	1	1	0	1	0	1	0	1	0	0	1	1	1	0	1	0.55	0.117098	0.667098	0.432902
6.35	1	0	0	1	1	0	0	1	0	1	0	1	0	0	0	1	1	0	1	1	0.5	0.117688	0.617688	0.382312
6.4	0	1	1	0	0	1	1	0	1	0	0	0	0	0	0	1	1	1	1	1	0.5	0.117688	0.617688	0.382312
6.45	1	1	0	1	1	1	0	1	0	0	0	0	0	1	0	1	0	1	1	1	0.55	0.117098	0.667098	0.432902
6.5	0	0	1	0	0	0	1	0	1	1	1	0	0	0	0	1	1	1	0	0	0.4	0.11531	0.51531	0.28469
6.55	1	1	0	1	1	1	0	1	0	0	0	1	0	0	0	1	1	1	1	1	0.6	0.11531	0.71531	0.48469
6.6	0	1	1	1	0	0	1	0	1	1	0	0	1	0	0	1	0	1	1	1	0.55	0.117098	0.667098	0.432902
6.65	1	0	0	0	1	1	0	1	0	0	1	0	0	0	0	1	1	0	1	0	0.4	0.11531	0.51531	0.28469
6.7	0	1	1	1	0	0	1	0	1	1	0	0	0	0	0	1	1	1	1	1	0.55	0.117098	0.667098	0.432902
6.75	1	0	0	0	1	1	0	1	0	0	1	0	0	0	0	1	1	1	0	0	0.4	0.11531	0.51531	0.28469
6.8	0	1	1	1	0	0	1	0	1	1	0	1	0	0	0	1	1	1	1	1	0.6	0.11531	0.71531	0.48469
6.85	1	0	0	0	1	1	0	1	0	0	0	0	0	0	1	1	1	1	1	1	0.5	0.117688	0.617688	0.382312
6.9	0	1	1	1	0	0	1	0	1	1	1	0	0	0	0	1	1	1	0	1	0.55	0.117098	0.667098	0.432902
6.95	1	0	0	0	1	1	0	1	0	0	0	0	0	1	0	0	1	1	1	1	0.45	0.117098	0.567098	0.332902
7	0	1	1	1	0	1	1	0	1	1	0	0	0	0	0	1	1	1	1	0	0.55	0.117098	0.667098	0.432902
7.05	1	0	0	0	1	0	0	1	0	0	1	0	1	0	0	1	1	1	1	1	0.5	0.117688	0.617688	0.382312
7.1	0	1	1	1	0	1	1	0	1	1	0	1	0	0	0	1	1	1	0	0	0.55	0.117098	0.667098	0.432902
7.15	1	0	1	0	1	0	0	1	0	0	1	0	0	0	0	1	0	1	1	1	0.45	0.117098	0.567098	0.332902
7.2	0	1	0	1	0	1	1	0	1	1	0	0	0	0	0	1	1	1	1	1	0.55	0.117098	0.667098	0.432902
7.25	1	0	1	0	1	0	0	1	0	0	1	1	0	0	0	1	1	1	0	1	0.5	0.117688	0.617688	0.382312
7.3	0	1	0	1	0	1	1	0	1	1	0	0	1	1	0	1	1	1	1	0	0.6	0.11531	0.71531	0.48469
7.35	1	0	1	0	1	0	0	1	0	0	0	1	0	0	0	1	0	1	0	1	0.4	0.11531	0.51531	0.28469
7.4	0	1	0	1	0	1	1	0	1	1	1	0	0	0	0	1	1	1	1	1	0.6	0.11531	0.71531	0.48469
7.45	1	0	1	1	0	0	0	1	0	0	0	0	0	0	0	1	1	1	1	0	0.4	0.11531	0.51531	0.28469
7.5	0	1	0	0	1	1	1	0	1	1	0	1	0	0	0	1	1	0	0	1	0.5	0.117688	0.617688	0.382312
7.55	1	0	1	1	0	0	0	1	0	0	1	0	0	0	0	1	1	1	1	1	0.5	0.117688	0.617688	0.382312
7.6	0	1	0	0	1	1	1	0	1	1	0	0	0	0	0	1	1	0	1	1	0.5	0.117688	0.617688	0.382312
7.65	1	0	1	1	0	0	0	1	0	0	0	0	0	0	0	1	0	1	0	0	0.3	0.107863	0.407863	0.192137
7.7	0	1	0	0	1	1	1	0	1	1	1	0	1	0	0	1	1	1	1	1	0.65	0.112267	0.762267	0.537733
7.75	1	0	1	1	0	0	0	1	0	0	0	0	0	1	0	1	1	1	1	1	0.5	0.117688	0.617688	0.382312
7.8	0	1	0	0	0	1	1	0	1	1	1	1	0	0	0	1	1	1	1	0	0.55	0.117098	0.667098	0.432902
7.85	1	0	1	1	1	0	0	1	0	0	0	0	0	0	0	1	1	1	0	1	0.45	0.117098	0.567098	0.332902
7.9	0	1	0	0	0	1	1	0	1	1	1	0	0	0	0	1	0	0	1	0	0.4	0.11531	0.51531	0.28469
7.95	1	0	1	1	0	0	0	1	0	0	0	1	0	0	0	1	1	1	1	1	0.5	0.117688	0.617688	0.382312
8	0	1	0	1	1	1	1	0	1	1	0	0	1	0	0	1	1	1	1	1	0.65	0.112267	0.762267	0.537733
8.05	1	0	1	0	0	0	0	1	0	0	1	0	0	0	1	1	0	1	1	1	0.45	0.117098	0.567098	0.332902
8.1	0	1	0	1	1	1	1	0	1	1	0	1	0	0	0	1	1	1	0	0	0.55	0.117098	0.667098	0.432902
8.15	1	0	1	0	0	1	0	1	0	0	1	0	0	0	0	0	1	0	1	1	0.4	0.11531	0.51531	0.28469
8.2	0	1	0	1	1	0	1	0	1	1	0	0	0	0	0	1	1	1	1	1	0.55	0.117098	0.667098	0.432902
8.25	1	1	1	1	0	1	0	1	0	0	1	0	0	1	0	1	1	1	1	0	0.6	0.11531	0.71531	0.48469
8.3	0	0	0	0	1	0	1	0	1	1	0	0	1	0	0	1	1	1	0	1	0.45	0.117098	0.567098	0.332902
8.35	1	1	1	1	0	1	0	1	0	0	0	0	0	0	0	1	1	0	1	0	0.45	0.117098	0.567098	0.332902
8.4	0	0	0	0	1	0	1	0	1	1	1	0	0	1	0	1	1	1	1	1	0.55	0.117098	0.667098	0.432902
8.45	1	1	1	1	0	1	0	1	0	0	0	1	0	0	0	1	1	1	1	1	0.6	0.11531	0.71531	0.48469
8.5	0	0	0	0	1	0	1	0	1	1	1	0	0	0	0	1	1	1	1	0	0.45	0.117098	0.567098	0.332902
8.55	1	1	1	1	0	1	0	1	0	0	0	0	0	0	0	1	0	0	0	1	0.4	0.11531	0.51531	0.28469
8.6	0	0	0	0	1	0	1	0	1	1	1	1	0	0	0	1	1	1	1	1	0.55	0.117098	0.667098	0.432902
8.65	1	1	1	1	0	1	0	1	0	0	0	0	0	0	0	1	1	1	0	1	0.5	0.117688	0.617688	0.382312
8.7	0	0	0	0	1	0	1	0	1	1	1	0	0	0	0	1	1	1	1	0	0.45	0.117098	0.567098	0.332902
8.75	1	1	1	1	0	1	0	1	0	0	0	0	1	0	0	1	1	1	1	1	0.6	0.11531	0.71531	0.48469
8.8	0	0	0	0	1	1	1	0	1	1	0	0	0	0	0	0	1	1	1	1	0.45	0.117098	0.567098	0.332902
8.85	1	1	1	1	0	0	0	1	0	0	1	1	0	0	0	1	0	1	1	0	0.5	0.117688	0.617688	0.382312
8.9	0	1	1	0	1	1	1	0	1	1	0	0	0	0	0	1	1	1	1	1	0.6	0.11531	0.71531	0.48469
8.95	1	0	0	1	0	0	0	1	0	0	1	0	0	0	0	1	1	1	0	1	0.4	0.11531	0.51531	0.28469
9	0	1	0	0	1	1	1	0	1	1	0	0	1	1	0	1	1	0	1	0	0.55	0.117098	0.667098	0.432902
9.05	1	0	1	1	0	0	0	1	0	0	0	1	0	0	0	1	1	1	1	1	0.5	0.117688	0.617688	0.382312
9.1	0	1	0	0	1	1	1	0	1	1	1	0	0	0	0	1	1	1	1	1	0.6	0.11531	0.71531	0.48469
9.15	1	0	1	1	0	0	0	1	0	0	0	0	0	0	0	1	0	1	0	1	0.35	0.112267	0.462267	0.237733
9.2	0	1	0	1	1	1	1	0	1	1	1	0	0	0	0	1	1	1	1	1	0.65	0.112267	0.762267	0.537733
9.25	1	0	1	0	0	0	0	1	0	0	0	1	0	0	0	1	1	1	1	0	0.4	0.11531	0.51531	0.28469
9.3	0	1	0	1	1	1	1	0	1	1	0	0	0	0	0	1	1	1	1	1	0.6	0.11531	0.71531	0.48469
9.35	1	0	1	0	0	0	0	1	0	0	1	0	1	0	0	1	1	1	0	1	0.45	0.117098	0.567098	0.332902
9.4	0	1	0	1	1	1	1	0	1	1	0	0	0	0	0	1	1	1	1	0	0.55	0.117098	0.667098	0.432902
9.45	1	0	1	0	0	0	0	1	0	0	1	1	0	0	0	1	0	1	1	1	0.45	0.117098	0.567098	0.332902
9.5	0	1	0	1	1	1	1	0	1	1	0	0	0	1	0	1	1	0	0	1	0.55	0.117098	0.667098	0.432902
9.55	1	0	1	0	0	0	0	1	0	0	0	0	0	0	0	1	1	1	1	1	0.4	0.11531	0.51531	0.28469
9.6	0	1	0	1	1	1	1	0	1	1	1	1	1	0	0	1	1	1	1	1	0.75	0.101921	0.851921	0.648079
9.65	1	1	1	0	0	0	0	1	0	0	0	0	0	0	0	1	1	1	0	0	0.35	0.112267	0.462267	0.237733
9.7	0	0	0	1	1	1	1	0	1	0	0	0	0	0	0	1	1	1	1	1	0.5	0.117688	0.617688	0.382312
9.75	1	1	1	0	0	0	0	1	0	1	1	0	0	0	0	1	1	1	1	1	0.55	0.117098	0.667098	0.432902
9.8	0	0	0	1	1	1	1	0	1	0	0	0	0	0	0	1	1	0	1	0	0.4	0.11531	0.51531	0.28469
9.85	1	1	1	0	0	0	0	1	0	1	1	0	0	0	1	1	1	1	0	1	0.55	0.117098	0.667098	0.432902
9.9	0	0	0	1	0	1	1	0	1	0	0	1	0	0	0	0	1	0	1	0	0.35	0.112267	0.462267	0.237733
9.95	0	1	1	0	1	0	0	1	0	1	0	0	0	0	0	1	0	1	1	1	0.45	0.117098	0.567098	0.332902
10	1	0	0	1	0	1	1	0	1	0	1	0	1	0	0	1	1	1	0	1	0.55	0.117098	0.667098	0.432902

## Sheet: stim 10s-20Hz-5ms - CNQX
Cell ID	BG058					BG059
File-sweep	0008-1	0008-2	0008-3	0008-4	0008-5	0008-1	0008-2	0008-3	0008-4	0008-5	Mean Bin count	s.e.m.	Mean + s.e.m.	Mean - s.e.m.
	1	1	1	1	1	1	1	1	1	1	1	0	1	1
	1	1	1	1	1	1	1	1	1	1	1	0	1	1
	1	1	1	1	1	0	0	0	1	0	0.5	0.202031	0.702031	0.297969
	1	1	1	1	1	0	0	0	0	0	0.375	0.195615	0.570615	0.179385
	1	1	1	1	2	0	0	1	0	0	0.625	0.281215	0.906215	0.343785
	1	1	1	1	1	0	1	0	0	0	0.5	0.202031	0.702031	0.297969
	1	1	1	1	1	0	0	0	0	0	0.375	0.195615	0.570615	0.179385
	1	1	1	1	1	0	0	1	0	0	0.5	0.202031	0.702031	0.297969
	1	1	1	1	1	1	0	0	0	0	0.5	0.202031	0.702031	0.297969
	1	1	1	1	1	0	1	0	0	0	0.5	0.202031	0.702031	0.297969
	1	1	1	1	1	0	0	1	0	0	0.5	0.202031	0.702031	0.297969
	1	1	1	1	1	0	0	0	0	0	0.375	0.195615	0.570615	0.179385
	1	1	1	1	2	1	1	0	0	0	0.75	0.267261	1.01726	0.482739
	1	1	1	1	1	0	0	0	0	0	0.375	0.195615	0.570615	0.179385
	1	1	1	1	1	0	0	0	0	0	0.375	0.195615	0.570615	0.179385
	1	1	1	1	1	0	0	1	0	0	0.5	0.202031	0.702031	0.297969
	0	1	1	1	1	0	0	0	0	0	0.375	0.195615	0.570615	0.179385
	1	1	1	2	0	0	0	1	0	0	0.5	0.285714	0.785714	0.214286
	0	1	0	0	1	0	1	0	0	0	0.25	0.174964	0.424964	0.0750364
	1	0	1	1	1	0	0	0	0	0	0.375	0.195615	0.570615	0.179385
	0	1	1	0	0	0	1	0	0	0	0.25	0.174964	0.424964	0.0750364
	1	1	0	1	1	1	0	1	1	0	0.625	0.195615	0.820615	0.429385
	1	0	1	1	1	0	0	0	0	0	0.375	0.195615	0.570615	0.179385
	0	1	1	0	0	0	0	1	0	0	0.25	0.174964	0.424964	0.0750364
	1	0	0	1	0	1	1	0	1	0	0.5	0.202031	0.702031	0.297969
	0	1	1	0	1	0	0	0	0	0	0.25	0.174964	0.424964	0.0750364
	1	0	0	1	0	0	0	0	0	0	0.125	0.133631	0.258631	-0.00863062
	0	1	1	0	0	0	0	1	0	0	0.25	0.174964	0.424964	0.0750364
	1	0	0	1	1	0	1	0	0	0	0.375	0.195615	0.570615	0.179385
	0	1	1	0	0	1	0	0	0	0	0.25	0.174964	0.424964	0.0750364
	1	0	0	1	0	0	0	0	1	0	0.25	0.174964	0.424964	0.0750364
	0	1	0	0	0	0	0	0	0	0	0	0	0	0
	1	0	1	1	1	0	1	1	0	0	0.625	0.195615	0.820615	0.429385
	0	1	0	0	0	0	0	0	0	0	0	0	0	0
	1	0	0	0	0	0	0	0	1	0	0.125	0.133631	0.258631	-0.00863062
	0	1	1	0	0	1	1	0	0	0	0.375	0.195615	0.570615	0.179385
	1	0	0	0	1	0	0	0	0	0	0.125	0.133631	0.258631	-0.00863062
	0	0	0	0	0	0	0	0	0	0	0	0	0	0
	0	1	1	0	0	0	1	1	0	0	0.375	0.195615	0.570615	0.179385
	1	0	0	0	0	1	0	0	0	0	0.125	0.133631	0.258631	-0.00863062
	0	0	0	1	0	0	1	0	0	0	0.25	0.174964	0.424964	0.0750364
	0	0	1	0	0	0	0	1	1	0	0.375	0.195615	0.570615	0.179385
	0	1	0	0	1	1	0	0	0	0	0.25	0.174964	0.424964	0.0750364
	0	0	0	0	0	0	0	0	0	0	0	0	0	0
	1	0	0	0	0	0	0	0	0	1	0.125	0.133631	0.258631	-0.00863062
	0	1	1	1	0	0	1	1	0	0	0.5	0.202031	0.702031	0.297969
	0	0	0	0	0	1	0	0	1	0	0.25	0.174964	0.424964	0.0750364
	1	0	0	0	0	0	0	0	0	0	0	0	0	0
	0	1	0	0	0	0	0	0	1	0	0.125	0.133631	0.258631	-0.00863062
	0	0	1	1	1	1	1	1	0	0	0.75	0.174964	0.924964	0.575036
	0	0	0	0	0	0	0	0	0	0	0	0	0	0
	0	0	0	0	0	0	0	0	0	0	0	0	0	0
	1	0	0	1	0	1	1	0	1	0	0.5	0.202031	0.702031	0.297969
	0	0	1	0	0	0	0	1	0	0	0.25	0.174964	0.424964	0.0750364
	0	0	0	0	0	0	1	0	0	0	0.125	0.133631	0.258631	-0.00863062
	0	1	0	0	0	1	0	0	0	0	0.125	0.133631	0.258631	-0.00863062
	1	0	0	0	1	0	0	0	0	0	0.125	0.133631	0.258631	-0.00863062
	0	0	0	0	0	0	0	0	0	1	0.125	0.133631	0.258631	-0.00863062
	0	1	0	0	0	0	0	1	0	0	0.125	0.133631	0.258631	-0.00863062
	0	0	0	0	0	0	0	0	0	0	0	0	0	0
	0	0	0	0	0	0	0	0	0	1	0.125	0.133631	0.258631	-0.00863062
	0	0	0	0	0	1	1	1	0	0	0.375	0.195615	0.570615	0.179385
	0	1	1	0	0	0	0	0	0	0	0.125	0.133631	0.258631	-0.00863062
	1	0	0	0	0	0	0	0	1	0	0.125	0.133631	0.258631	-0.00863062
	0	0	0	1	0	1	0	0	0	0	0.25	0.174964	0.424964	0.0750364
	0	0	0	0	0	0	0	1	0	0	0.125	0.133631	0.258631	-0.00863062
	0	1	1	0	1	0	1	0	0	0	0.375	0.195615	0.570615	0.179385
	0	0	0	0	0	0	0	0	0	0	0	0	0	0
	0	0	0	0	0	0	0	0	1	0	0.125	0.133631	0.258631	-0.00863062
	1	0	0	1	0	1	0	0	0	0	0.25	0.174964	0.424964	0.0750364
	0	0	0	0	0	0	0	0	0	0	0	0	0	0
	0	0	0	0	0	0	0	1	0	0	0.125	0.133631	0.258631	-0.00863062
	0	0	1	0	0	0	0	0	0	0	0.125	0.133631	0.258631	-0.00863062
	0	0	0	0	0	1	1	0	0	0	0.25	0.174964	0.424964	0.0750364
	1	0	0	0	0	0	0	0	0	0	0	0	0	0
	0	1	0	0	0	0	0	0	1	0	0.125	0.133631	0.258631	-0.00863062
	0	0	0	1	0	0	0	0	0	0	0.125	0.133631	0.258631	-0.00863062
	0	0	0	0	1	0	1	1	0	1	0.5	0.202031	0.702031	0.297969
	0	0	1	0	0	1	0	0	0	0	0.25	0.174964	0.424964	0.0750364
	1	1	0	0	0	0	0	0	0	0	0	0	0	0
	0	0	0	0	0	0	0	0	0	0	0	0	0	0
	0	0	0	0	0	0	0	0	0	1	0.125	0.133631	0.258631	-0.00863062
	1	0	0	0	0	0	0	1	0	0	0.125	0.133631	0.258631	-0.00863062
	0	0	0	0	0	1	0	0	1	0	0.25	0.174964	0.424964	0.0750364
	0	0	0	1	1	0	1	0	0	0	0.375	0.195615	0.570615	0.179385
	0	0	1	0	0	0	0	0	0	0	0.125	0.133631	0.258631	-0.00863062
	0	1	0	0	0	0	0	1	0	0	0.125	0.133631	0.258631	-0.00863062
	1	0	0	1	0	0	0	0	0	0	0.125	0.133631	0.258631	-0.00863062
	0	0	0	0	0	1	0	0	1	0	0.25	0.174964	0.424964	0.0750364
	0	0	0	0	0	0	1	0	0	0	0.125	0.133631	0.258631	-0.00863062
	1	0	1	0	0	0	0	0	0	0	0.125	0.133631	0.258631	-0.00863062
	0	1	0	0	1	0	0	0	0	0	0.125	0.133631	0.258631	-0.00863062
	0	0	0	0	0	0	1	0	1	0	0.25	0.174964	0.424964	0.0750364
	0	0	0	0	0	1	0	0	0	0	0.125	0.133631	0.258631	-0.00863062
	0	0	0	1	0	0	0	0	0	0	0.125	0.133631	0.258631	-0.00863062
	0	0	0	0	0	0	0	1	0	0	0.125	0.133631	0.258631	-0.00863062
	1	0	0	0	1	0	0	0	0	0	0.125	0.133631	0.258631	-0.00863062
	0	1	1	0	0	0	1	0	0	0	0.25	0.174964	0.424964	0.0750364
	0	0	0	1	0	0	0	0	0	0	0.125	0.133631	0.258631	-0.00863062
	0	0	0	0	0	0	0	0	0	0	0	0	0	0
	0	0	0	0	0	0	0	0	0	1	0.125	0.133631	0.258631	-0.00863062
	1	0	1	0	0	0	1	1	1	0	0.5	0.202031	0.702031	0.297969
	0	0	0	0	0	1	0	0	0	0	0.125	0.133631	0.258631	-0.00863062
	0	1	0	0	0	0	0	0	0	0	0	0	0	0
	0	0	0	0	1	0	0	0	0	0	0.125	0.133631	0.258631	-0.00863062
	0	1	1	0	0	0	0	1	0	0	0.25	0.174964	0.424964	0.0750364
	0	0	0	1	0	0	0	0	0	0	0.125	0.133631	0.258631	-0.00863062
	1	0	0	0	0	1	0	0	0	0	0.125	0.133631	0.258631	-0.00863062
	0	0	0	0	1	0	1	1	0	0	0.375	0.195615	0.570615	0.179385
	0	0	0	0	0	0	0	0	0	0	0	0	0	0
	0	1	0	0	0	0	0	0	1	0	0.125	0.133631	0.258631	-0.00863062
	0	0	1	0	0	0	0	0	0	0	0.125	0.133631	0.258631	-0.00863062
	0	0	0	1	0	0	0	0	0	0	0.125	0.133631	0.258631	-0.00863062
	0	0	0	0	0	1	0	0	0	0	0.125	0.133631	0.258631	-0.00863062
	0	1	0	0	0	0	0	0	0	0	0	0	0	0
	1	0	0	0	0	0	0	0	0	0	0	0	0	0
	0	0	0	0	1	1	0	1	0	0	0.375	0.195615	0.570615	0.179385
	0	0	0	0	0	0	0	0	0	0	0	0	0	0
	1	0	1	1	0	0	0	0	0	0	0.25	0.174964	0.424964	0.0750364
	0	0	0	0	0	0	1	0	0	0	0.125	0.133631	0.258631	-0.00863062
	0	1	0	0	0	0	0	0	0	0	0	0	0	0
	0	0	0	0	0	0	0	0	0	0	0	0	0	0
	0	0	0	0	1	0	0	0	0	0	0.125	0.133631	0.258631	-0.00863062
	1	0	1	0	0	0	0	0	1	0	0.25	0.174964	0.424964	0.0750364
	0	0	0	0	0	0	1	0	0	0	0.125	0.133631	0.258631	-0.00863062
	0	1	0	0	0	0	0	0	0	1	0.125	0.133631	0.258631	-0.00863062
	0	0	1	0	0	0	0	0	0	0	0.125	0.133631	0.258631	-0.00863062
	0	0	0	0	0	1	0	0	1	0	0.25	0.174964	0.424964	0.0750364
	0	0	0	1	0	0	0	0	0	0	0.125	0.133631	0.258631	-0.00863062
	1	0	1	1	1	0	0	0	0	0	0.375	0.195615	0.570615	0.179385
	0	1	1	0	0	0	0	0	0	0	0.125	0.133631	0.258631	-0.00863062
	0	0	0	0	0	0	0	0	0	0	0	0	0	0
	0	0	0	0	0	0	0	0	0	0	0	0	0	0
	1	1	0	0	1	0	0	0	0	1	0.25	0.174964	0.424964	0.0750364
	0	0	0	0	0	0	0	0	0	0	0	0	0	0
	0	0	0	1	0	0	0	0	1	0	0.25	0.174964	0.424964	0.0750364
	1	0	0	0	0	0	0	0	0	0	0	0	0	0
	0	0	1	0	0	0	1	0	0	0	0.25	0.174964	0.424964	0.0750364
	0	0	0	0	0	1	0	0	0	0	0.125	0.133631	0.258631	-0.00863062
	0	1	0	0	0	0	0	0	0	0	0	0	0	0
	0	0	0	0	0	0	0	0	0	0	0	0	0	0
	1	0	0	0	0	0	0	1	0	0	0.125	0.133631	0.258631	-0.00863062
	0	0	1	0	0	0	0	0	0	0	0.125	0.133631	0.258631	-0.00863062
	0	0	0	1	0	0	1	0	0	1	0.375	0.195615	0.570615	0.179385
	0	0	0	1	0	1	0	1	1	0	0.5	0.202031	0.702031	0.297969
	0	0	0	0	0	0	0	0	0	0	0	0	0	0
	0	1	0	0	1	0	0	0	0	0	0.125	0.133631	0.258631	-0.00863062
	0	0	1	0	0	0	0	0	0	0	0.125	0.133631	0.258631	-0.00863062
	1	0	3	0	0	0	0	0	0	0	0.375	0.400892	0.775892	-0.0258919
	0	0	0	1	0	0	1	0	0	0	0.25	0.174964	0.424964	0.0750364
	0	0	0	0	0	0	0	0	1	0	0.125	0.133631	0.258631	-0.00863062
	1	1	0	0	1	0	0	0	0	0	0.125	0.133631	0.258631	-0.00863062
	0	0	0	0	0	1	0	0	0	0	0.125	0.133631	0.258631	-0.00863062
	0	0	0	0	0	0	0	1	0	0	0.125	0.133631	0.258631	-0.00863062
	0	0	0	1	0	0	0	0	0	0	0.125	0.133631	0.258631	-0.00863062
	0	0	1	0	0	0	0	0	1	0	0.25	0.174964	0.424964	0.0750364
	1	1	0	0	1	0	0	0	0	0	0.125	0.133631	0.258631	-0.00863062
	0	1	0	0	0	0	0	0	0	0	0	0	0	0
	0	0	0	0	0	1	1	0	0	0	0.25	0.174964	0.424964	0.0750364
	0	0	0	0	0	0	0	0	0	1	0.125	0.133631	0.258631	-0.00863062
	1	0	0	0	0	0	0	0	0	0	0	0	0	0
	0	1	1	0	1	0	0	1	0	0	0.375	0.195615	0.570615	0.179385
	0	0	0	0	0	0	0	0	0	0	0	0	0	0
	0	0	0	1	0	0	1	0	0	0	0.25	0.174964	0.424964	0.0750364
	1	1	0	0	0	0	0	0	0	0	0	0	0	0
	0	0	0	0	0	0	0	1	0	0	0.125	0.133631	0.258631	-0.00863062
	0	0	0	1	1	0	0	0	0	0	0.25	0.174964	0.424964	0.0750364
	0	0	0	0	0	0	0	0	0	0	0	0	0	0
	0	0	0	0	0	0	0	0	0	0	0	0	0	0
	0	0	0	0	0	1	1	0	0	0	0.25	0.174964	0.424964	0.0750364
	0	0	1	0	0	0	0	0	1	0	0.25	0.174964	0.424964	0.0750364
	0	0	0	1	0	0	0	0	0	0	0.125	0.133631	0.258631	-0.00863062
	0	1	0	0	0	0	0	0	0	0	0	0	0	0
	1	0	0	0	0	0	0	0	0	0	0	0	0	0
	0	0	0	0	0	0	0	0	0	0	0	0	0	0
	0	0	0	1	0	0	0	0	0	0	0.125	0.133631	0.258631	-0.00863062
	0	0	1	0	0	0	0	0	0	0	0.125	0.133631	0.258631	-0.00863062
	0	1	0	0	0	0	0	0	0	0	0	0	0	0
	1	0	0	0	1	0	1	0	1	0	0.375	0.195615	0.570615	0.179385
	0	0	0	0	0	0	0	1	0	0	0.125	0.133631	0.258631	-0.00863062
	0	0	0	0	0	1	0	0	0	1	0.25	0.174964	0.424964	0.0750364
	1	0	1	0	0	0	0	0	0	0	0.125	0.133631	0.258631	-0.00863062
	0	0	0	0	0	0	0	0	0	0	0	0	0	0
	0	0	0	0	0	0	0	0	1	0	0.125	0.133631	0.258631	-0.00863062
	0	1	0	0	0	0	0	0	0	0	0	0	0	0
	0	0	0	0	0	0	0	0	0	0	0	0	0	0
	0	0	0	0	1	1	0	0	0	0	0.25	0.174964	0.424964	0.0750364
	1	0	1	0	0	0	0	0	0	0	0.125	0.133631	0.258631	-0.00863062
	0	0	0	0	0	0	0	0	0	0	0	0	0	0
	0	1	0	0	0	0	0	0	0	0	0	0	0	0
	0	0	0	1	0	0	1	0	0	0	0.25	0.174964	0.424964	0.0750364
	0	0	0	0	0	0	0	0	0	0	0	0	0	0
	0	0	0	0	1	0	0	0	0	0	0.125	0.133631	0.258631	-0.00863062
	0	0	1	0	0	0	0	0	0	0	0.125	0.133631	0.258631	-0.00863062
	1	0	0	0	0	0	0	0	0	0	0	0	0	0
	0	0	0	1	0	0	0	0	1	0	0.25	0.174964	0.424964	0.0750364
	0	1	0	0	0	0	0	1	0	0	0.125	0.133631	0.258631	-0.00863062
	0	0	0	0	0	0	0	0	0	0	0	0	0	0
	0	0	0	1	0	0	0	0	0	0	0.125	0.133631	0.258631	-0.00863062
	0	1	0	0	0	0	0	0	0	1	0.125	0.133631	0.258631	-0.00863062

## Sheet: Stim 10s-20hz-5ms (O2 20%)
	BG090_0005					BG091_0005					BG092_0005			BG093_0005					BG094_0005
Temps (s)	1	2	3	4	5	1	2	3	4	5	1	2	3	1	2	3	4	5	1	2	3	4	5	Mean	s,e,m,	sem+	sem-
0.05	1	1	1	1	1	1	1	1	1	1	1	1	1	1	1	1	1	1	1	1	1	1	1	1	0	1	1
0.1	1	1	1	1	1	0	0	0	0	0	1	1	1	0	0	0	0	0	1	1	1	1	1	0.565217	0.108065	0.673282	0.457152
0.15	1	1	1	1	1	0	0	0	0	0	1	1	1	0	0	0	0	0	1	1	1	1	1	0.565217	0.108065	0.673282	0.457152
0.2	1	1	1	1	1	0	0	0	0	0	1	1	1	0	0	0	0	0	1	1	1	1	1	0.565217	0.108065	0.673282	0.457152
0.25	1	1	1	1	1	1	1	1	0	0	1	1	1	0	1	0	0	0	1	1	1	1	1	0.73913	0.0957224	0.834853	0.643408
0.3	1	1	1	1	1	1	1	1	1	0	1	1	1	1	1	1	0	0	1	1	1	1	1	0.869565	0.0734157	0.942981	0.79615
0.35	1	1	1	1	1	1	1	1	1	0	1	1	1	1	1	1	2	0	1	1	1	1	1	0.956522	0.078157	1.03468	0.878365
0.4	1	1	1	1	1	1	1	1	1	1	1	1	1	1	1	1	1	1	1	1	1	1	1	1	0	1	1
0.45	1	1	1	1	1	1	1	1	1	1	1	1	1	1	1	1	1	1	1	1	1	1	1	1	0	1	1
0.5	1	1	1	1	1	1	1	1	1	1	1	1	1	1	1	1	1	1	1	1	1	1	1	1	0	1	1
0.55	1	1	1	1	1	1	1	1	1	1	1	1	1	1	1	1	1	1	1	1	1	1	1	1	0	1	1
0.6	1	1	1	1	1	1	1	1	1	0	1	1	1	1	1	1	1	1	1	1	1	1	1	0.956522	0.0444554	1.00098	0.912066
0.65	1	1	1	1	1	1	1	1	1	1	1	1	1	1	1	1	1	1	1	1	1	1	1	1	0	1	1
0.7	1	1	1	1	1	0	1	1	1	1	1	1	1	1	1	1	1	1	1	1	1	1	1	0.956522	0.0444554	1.00098	0.912066
0.75	1	1	1	1	1	1	0	1	0	0	1	1	1	1	1	1	1	1	1	1	1	1	1	0.869565	0.0734157	0.942981	0.79615
0.8	1	1	1	1	1	1	1	0	1	1	1	1	1	1	1	1	1	1	1	1	1	1	1	0.956522	0.0444554	1.00098	0.912066
0.85	1	1	1	1	1	0	0	1	0	0	1	1	1	1	1	1	1	1	1	1	1	1	1	0.826087	0.0826267	0.908714	0.74346
0.9	1	1	1	1	1	0	1	0	1	1	1	1	1	1	1	1	1	1	1	1	1	1	1	0.913043	0.061424	0.974467	0.851619
0.95	1	1	1	1	1	1	1	1	1	1	1	1	1	1	1	1	1	1	1	1	1	1	1	1	0	1	1
1	1	1	1	1	1	0	0	0	0	0	1	1	1	1	1	1	1	1	1	1	1	1	1	0.782609	0.0899155	0.872524	0.692693
1.05	1	1	1	1	1	0	1	0	1	1	1	1	1	1	1	1	1	1	1	1	1	1	1	0.913043	0.061424	0.974467	0.851619
1.1	1	1	1	1	1	0	0	1	1	1	1	1	1	1	1	1	1	1	1	1	1	1	1	0.913043	0.061424	0.974467	0.851619
1.15	1	1	1	1	1	1	0	0	1	0	1	1	1	1	1	1	1	1	1	1	1	1	1	0.869565	0.0734157	0.942981	0.79615
1.2	1	1	1	1	1	0	1	0	0	0	1	1	1	1	1	1	1	1	1	1	1	1	1	0.826087	0.0826267	0.908714	0.74346
1.25	1	1	1	1	1	0	0	1	0	0	1	1	1	1	1	1	1	1	1	1	1	1	1	0.826087	0.0826267	0.908714	0.74346
1.3	1	1	1	1	1	1	0	0	0	1	1	1	1	1	1	1	1	1	1	1	1	1	1	0.869565	0.0734157	0.942981	0.79615
1.35	0	1	1	1	1	0	1	1	1	1	1	1	1	1	1	1	1	1	1	1	1	1	1	0.913043	0.061424	0.974467	0.851619
1.4	1	1	1	1	0	0	1	0	0	0	1	1	1	1	1	1	1	0	1	1	1	1	1	0.73913	0.0957224	0.834853	0.643408
1.45	1	1	1	0	1	0	0	0	1	1	1	1	1	1	1	1	1	1	1	1	1	1	1	0.826087	0.0826267	0.908714	0.74346
1.5	0	1	1	1	1	0	1	1	0	0	1	1	1	1	1	1	0	1	1	1	1	1	1	0.782609	0.0899155	0.872524	0.692693
1.55	1	1	1	1	0	0	0	0	1	0	1	1	1	1	1	0	1	1	1	1	1	1	1	0.73913	0.0957224	0.834853	0.643408
1.6	0	1	1	0	1	0	0	1	0	1	1	1	1	1	1	1	0	1	1	1	1	1	1	0.73913	0.0957224	0.834853	0.643408
1.65	1	1	0	1	1	1	1	0	0	0	1	1	1	1	1	0	1	0	1	1	1	1	0	0.695652	0.100305	0.795957	0.595347
1.7	0	0	1	1	0	0	0	0	1	0	1	1	1	0	0	1	1	1	1	1	1	1	1	0.608696	0.106389	0.715085	0.502306
1.75	1	1	1	0	1	0	0	1	1	0	1	1	1	1	1	1	0	0	1	1	1	1	1	0.73913	0.0957224	0.834853	0.643408
1.8	0	1	1	1	0	0	0	0	0	1	1	1	1	0	0	1	1	1	1	1	1	1	0	0.608696	0.106389	0.715085	0.502306
1.85	1	1	0	0	0	0	1	1	1	0	1	1	1	1	1	0	0	1	1	1	1	1	1	0.695652	0.100305	0.795957	0.595347
1.9	0	0	1	1	1	0	0	0	0	1	1	1	1	0	1	1	1	0	1	1	0	1	1	0.608696	0.106389	0.715085	0.502306
1.95	1	1	0	0	0	0	0	1	1	0	1	1	1	1	0	0	0	1	1	1	1	0	1	0.565217	0.108065	0.673282	0.457152
2	1	0	0	0	1	0	1	0	0	0	1	1	1	0	1	1	1	0	1	1	1	1	0	0.565217	0.108065	0.673282	0.457152
2.05	0	1	1	0	0	1	0	0	1	0	1	1	1	1	0	1	0	1	1	1	1	1	1	0.652174	0.103825	0.755999	0.548348
2.1	1	1	0	0	0	0	0	1	0	0	1	1	1	0	1	0	1	0	1	1	1	0	1	0.521739	0.108893	0.630632	0.412846
2.15	0	0	1	1	0	0	1	0	0	1	1	1	1	1	0	1	0	1	1	1	0	1	1	0.608696	0.106389	0.715085	0.502306
2.2	1	0	0	1	0	0	0	1	1	0	1	1	1	1	1	0	1	0	1	0	1	1	0	0.565217	0.108065	0.673282	0.457152
2.25	0	0	0	0	1	0	0	0	0	1	1	1	1	0	1	0	1	1	1	1	1	1	1	0.565217	0.108065	0.673282	0.457152
2.3	1	0	1	1	0	0	1	0	1	0	1	1	1	1	0	1	0	0	1	1	1	0	1	0.608696	0.106389	0.715085	0.502306
2.35	0	0	0	0	0	0	0	1	0	1	1	1	1	0	1	0	1	1	1	1	0	1	1	0.521739	0.108893	0.630632	0.412846
2.4	1	1	1	0	1	0	0	0	0	0	1	1	1	1	0	1	0	0	1	0	1	0	0	0.478261	0.108893	0.587154	0.369368
2.45	0	0	0	1	0	1	1	0	1	1	1	1	1	0	1	0	1	1	1	1	1	1	1	0.695652	0.100305	0.795957	0.595347
2.5	1	1	0	0	0	0	0	1	0	0	1	1	1	1	0	1	0	0	1	1	1	0	1	0.521739	0.108893	0.630632	0.412846
2.55	0	0	0	0	1	0	0	0	0	1	1	1	1	0	1	0	1	1	1	0	1	1	0	0.478261	0.108893	0.587154	0.369368
2.6	1	1	0	1	0	0	1	1	1	0	1	1	1	1	0	1	0	0	1	1	1	0	1	0.652174	0.103825	0.755999	0.548348
2.65	0	0	1	0	0	0	0	0	0	1	1	1	1	0	1	0	1	0	0	1	0	1	1	0.434783	0.108065	0.542848	0.326718
2.7	1	0	1	0	1	0	1	1	1	0	1	1	1	1	0	1	0	1	1	1	1	1	1	0.73913	0.0957224	0.834853	0.643408
2.75	1	1	0	0	0	0	0	0	0	1	1	1	1	0	1	0	1	0	1	0	0	0	0	0.391304	0.106389	0.497694	0.284915
2.8	0	0	1	1	0	0	0	0	1	0	1	1	1	1	0	1	0	1	1	1	1	1	1	0.608696	0.106389	0.715085	0.502306
2.85	1	0	0	0	1	1	0	0	0	0	1	1	1	1	1	0	1	0	1	1	1	1	0	0.565217	0.108065	0.673282	0.457152
2.9	0	0	0	0	0	0	1	1	1	1	1	1	1	0	0	1	0	0	0	1	0	1	1	0.478261	0.108893	0.587154	0.369368
2.95	1	1	0	0	0	0	0	0	0	0	1	1	1	1	1	0	1	1	1	0	1	0	0	0.478261	0.108893	0.587154	0.369368
3	0	0	0	1	1	0	1	1	1	0	1	1	1	1	0	0	0	0	1	1	1	1	1	0.608696	0.106389	0.715085	0.502306
3.05	1	1	1	1	0	0	0	0	0	1	1	1	1	0	1	1	0	1	1	1	1	0	0	0.608696	0.106389	0.715085	0.502306
3.1	0	0	0	0	0	0	1	0	1	0	1	1	1	1	0	0	1	0	1	0	0	1	1	0.434783	0.108065	0.542848	0.326718
3.15	1	0	0	1	0	1	0	1	0	1	1	1	1	0	1	1	0	1	0	1	1	1	0	0.608696	0.106389	0.715085	0.502306
3.2	0	1	1	0	1	0	0	0	0	0	1	1	1	1	0	0	1	0	1	1	1	0	1	0.521739	0.108893	0.630632	0.412846
3.25	1	0	0	0	0	0	1	1	0	1	1	1	1	0	1	1	0	0	1	0	0	1	0	0.478261	0.108893	0.587154	0.369368
3.3	0	0	0	0	0	0	0	0	1	0	1	1	1	1	0	0	1	1	1	1	1	1	1	0.521739	0.108893	0.630632	0.412846
3.35	1	1	1	0	1	1	0	0	0	0	1	1	1	0	1	1	0	0	1	1	0	0	0	0.521739	0.108893	0.630632	0.412846
3.4	0	0	1	0	0	0	1	1	0	0	1	1	1	1	0	0	1	1	1	1	1	1	1	0.608696	0.106389	0.715085	0.502306
3.45	1	1	0	1	0	0	0	1	1	1	1	1	1	0	1	1	0	0	1	0	0	1	0	0.565217	0.108065	0.673282	0.457152
3.5	0	0	0	0	1	1	0	0	0	0	1	1	1	1	0	0	1	1	0	1	1	0	1	0.478261	0.108893	0.587154	0.369368
3.55	1	1	1	0	0	0	1	1	1	0	1	1	1	0	1	1	0	0	1	1	0	1	0	0.608696	0.106389	0.715085	0.502306
3.6	1	0	0	0	0	0	0	0	0	1	1	1	1	1	1	0	1	0	1	0	1	0	1	0.478261	0.108893	0.587154	0.369368
3.65	0	0	1	1	1	1	0	1	1	0	1	1	1	0	0	0	0	1	1	1	0	1	0	0.565217	0.108065	0.673282	0.457152
3.7	1	1	0	1	0	0	1	0	0	1	1	1	1	1	1	0	1	0	1	1	1	0	1	0.652174	0.103825	0.755999	0.548348
3.75	0	0	0	0	0	0	0	1	0	0	1	1	1	0	0	1	0	1	0	1	0	1	0	0.347826	0.103825	0.451652	0.244001
3.8	1	0	1	0	1	0	1	0	1	0	1	1	1	1	1	1	1	0	1	1	1	1	1	0.73913	0.0957224	0.834853	0.643408
3.85	0	0	0	1	0	1	0	1	0	1	1	1	1	0	0	0	0	1	1	1	0	1	1	0.521739	0.108893	0.630632	0.412846
3.9	1	1	1	0	0	0	1	0	1	0	1	1	1	1	1	1	0	0	1	0	1	0	0	0.565217	0.108065	0.673282	0.457152
3.95	0	0	0	1	1	0	0	0	0	0	1	1	1	0	0	0	1	1	1	1	1	1	1	0.521739	0.108893	0.630632	0.412846
4	1	0	0	0	0	0	1	1	0	1	1	1	1	1	1	1	0	0	0	0	0	0	0	0.434783	0.108065	0.542848	0.326718
4.05	0	1	0	1	0	0	0	0	0	0	1	1	1	0	0	0	1	1	1	1	1	1	1	0.521739	0.108893	0.630632	0.412846
4.1	1	0	0	0	0	1	0	0	1	1	0	1	1	1	1	1	0	0	1	1	1	1	0	0.565217	0.108065	0.673282	0.457152
4.15	0	1	1	0	1	0	1	1	0	0	1	1	1	0	0	0	1	1	0	0	1	0	1	0.521739	0.108893	0.630632	0.412846
4.2	1	0	0	1	0	0	0	0	0	0	1	0	1	1	1	1	0	0	1	1	0	1	1	0.478261	0.108893	0.587154	0.369368
4.25	1	0	0	0	0	1	0	1	1	0	1	1	1	0	0	0	1	1	1	1	1	0	0	0.521739	0.108893	0.630632	0.412846
4.3	0	1	0	1	1	0	1	0	0	1	1	1	1	1	1	1	0	0	1	0	1	1	1	0.652174	0.103825	0.755999	0.548348
4.35	1	0	1	0	0	0	0	1	0	0	1	1	1	0	0	0	1	1	0	1	0	0	1	0.434783	0.108065	0.542848	0.326718
4.4	0	1	0	0	1	0	1	0	1	0	1	1	1	1	1	1	0	0	1	1	1	1	0	0.608696	0.106389	0.715085	0.502306
4.45	1	0	0	0	0	1	0	0	0	1	1	1	0	0	0	0	1	1	1	1	0	0	1	0.434783	0.108065	0.542848	0.326718
4.5	0	1	1	0	1	0	0	1	0	0	1	1	1	1	1	1	0	0	0	0	1	1	1	0.565217	0.108065	0.673282	0.457152
4.55	1	0	0	1	0	0	1	0	1	0	1	1	1	0	0	0	1	1	1	1	1	1	0	0.565217	0.108065	0.673282	0.457152
4.6	0	1	1	0	0	0	0	1	0	1	1	1	1	1	1	1	0	0	1	1	0	0	1	0.565217	0.108065	0.673282	0.457152
4.65	1	0	0	1	1	1	1	0	1	0	1	1	1	0	0	0	1	0	0	0	1	1	0	0.521739	0.108893	0.630632	0.412846
4.7	0	1	1	0	0	0	0	1	0	1	1	1	1	1	1	1	0	0	1	1	0	1	1	0.608696	0.106389	0.715085	0.502306
4.75	1	0	0	1	1	0	0	0	0	0	1	1	1	0	1	0	1	1	1	1	1	1	0	0.565217	0.108065	0.673282	0.457152
4.8	0	0	0	0	0	0	1	1	0	0	0	1	0	1	0	1	0	0	1	0	0	1	1	0.347826	0.103825	0.451652	0.244001
4.85	1	1	0	0	0	1	0	0	0	0	1	1	1	0	1	0	0	1	1	1	1	0	0	0.478261	0.108893	0.587154	0.369368
4.9	0	0	0	0	1	0	1	0	1	0	1	1	1	1	0	1	1	0	0	0	1	1	1	0.521739	0.108893	0.630632	0.412846
4.95	1	1	1	0	0	1	0	0	0	1	1	1	1	0	1	0	0	1	1	1	0	0	0	0.521739	0.108893	0.630632	0.412846
5	0	0	0	1	1	0	1	1	1	0	0	1	1	1	0	1	1	0	0	0	1	1	1	0.565217	0.108065	0.673282	0.457152
5.05	1	1	0	0	0	0	0	0	0	0	1	1	1	0	1	0	0	1	1	1	1	1	1	0.521739	0.108893	0.630632	0.412846
5.1	1	0	1	1	0	0	1	1	1	1	0	0	0	1	0	1	1	0	0	0	0	0	0	0.434783	0.108065	0.542848	0.326718
5.15	1	1	0	0	0	0	0	0	0	0	1	1	1	0	1	0	0	0	1	1	1	1	1	0.478261	0.108893	0.587154	0.369368
5.2	0	0	0	0	1	1	1	0	1	0	1	1	1	1	0	1	0	1	1	0	0	0	0	0.478261	0.108893	0.587154	0.369368
5.25	1	1	1	1	0	0	0	0	0	1	1	1	1	0	1	0	1	0	0	1	1	1	1	0.608696	0.106389	0.715085	0.502306
5.3	0	0	0	0	1	0	1	1	0	0	0	1	1	1	1	1	0	1	1	1	1	0	0	0.521739	0.108893	0.630632	0.412846
5.35	1	1	1	0	0	1	0	0	0	1	1	1	0	1	0	0	1	0	1	1	0	1	1	0.565217	0.108065	0.673282	0.457152
5.4	0	0	0	0	0	0	1	1	1	0	1	0	1	0	1	1	0	1	0	0	1	1	1	0.478261	0.108893	0.587154	0.369368
5.45	1	1	1	1	1	0	0	0	0	1	1	1	1	1	0	0	1	0	1	1	1	0	0	0.608696	0.106389	0.715085	0.502306
5.5	0	0	0	0	0	0	1	1	1	0	1	1	1	0	1	1	0	0	1	0	1	1	1	0.521739	0.108893	0.630632	0.412846
5.55	0	1	0	0	1	1	0	0	0	0	1	1	1	1	0	0	1	1	0	1	1	1	0	0.521739	0.108893	0.630632	0.412846
5.6	1	0	1	1	0	0	1	0	1	1	1	1	0	0	1	0	0	0	1	1	0	0	1	0.521739	0.108893	0.630632	0.412846
5.65	0	0	0	0	1	0	0	1	0	0	1	1	1	1	0	1	1	1	0	1	1	1	0	0.521739	0.108893	0.630632	0.412846
5.7	1	1	0	0	0	0	1	0	0	1	1	1	1	0	1	0	0	0	1	0	1	1	1	0.521739	0.108893	0.630632	0.412846
5.75	0	0	1	1	0	1	0	1	1	0	0	0	1	1	0	1	0	1	1	1	0	0	1	0.521739	0.108893	0.630632	0.412846
5.8	1	1	0	0	0	0	1	0	0	1	1	1	1	0	1	0	1	0	1	0	1	1	0	0.521739	0.108893	0.630632	0.412846
5.85	0	0	1	1	1	1	0	1	0	0	0	1	1	1	0	1	0	1	0	1	0	0	1	0.521739	0.108893	0.630632	0.412846
5.9	1	0	0	0	0	0	1	0	0	0	1	1	0	0	1	0	1	0	1	1	1	1	0	0.434783	0.108065	0.542848	0.326718
5.95	0	1	0	0	1	1	0	1	1	0	1	1	1	1	0	1	0	1	1	0	1	1	1	0.652174	0.103825	0.755999	0.548348
6	1	0	1	1	0	0	1	0	0	1	1	1	1	0	1	0	1	0	0	1	0	0	0	0.478261	0.108893	0.587154	0.369368
6.05	0	1	0	0	0	0	0	0	1	0	1	1	0	1	0	1	0	0	1	1	1	1	1	0.478261	0.108893	0.587154	0.369368
6.1	1	0	0	1	1	1	1	0	0	1	0	0	1	0	1	0	1	1	1	0	0	1	0	0.521739	0.108893	0.630632	0.412846
6.15	0	0	1	0	0	0	0	1	0	0	1	1	1	1	0	1	0	0	0	1	1	0	1	0.434783	0.108065	0.542848	0.326718
6.2	1	1	0	0	1	0	0	0	1	1	1	1	1	0	1	0	0	0	1	0	1	1	1	0.565217	0.108065	0.673282	0.457152
6.25	0	0	1	1	0	0	1	1	0	0	1	1	0	1	0	1	1	0	1	1	0	0	1	0.521739	0.108893	0.630632	0.412846
6.3	1	1	0	0	1	1	0	0	0	1	1	1	1	0	1	0	0	1	1	1	1	1	0	0.608696	0.106389	0.715085	0.502306
6.35	0	0	1	1	0	0	1	0	1	0	1	1	1	1	0	1	1	0	1	1	1	1	1	0.652174	0.103825	0.755999	0.548348
6.4	1	1	0	0	1	0	0	1	0	0	1	1	1	0	1	0	0	1	0	0	1	0	0	0.434783	0.108065	0.542848	0.326718
6.45	0	0	1	0	0	1	1	0	0	1	1	0	1	1	0	1	1	0	1	1	0	1	1	0.565217	0.108065	0.673282	0.457152
6.5	1	1	0	1	1	0	0	0	1	0	1	1	0	0	1	0	0	1	1	1	1	0	0	0.521739	0.108893	0.630632	0.412846
6.55	0	0	1	0	0	0	0	1	0	0	0	1	1	1	0	1	1	0	0	0	1	1	1	0.434783	0.108065	0.542848	0.326718
6.6	1	1	0	0	1	1	1	0	0	1	1	1	1	0	1	0	0	1	1	1	1	0	0	0.608696	0.106389	0.715085	0.502306
6.65	0	0	1	0	0	0	0	1	1	0	0	1	1	1	0	1	0	0	1	0	0	1	1	0.434783	0.108065	0.542848	0.326718
6.7	1	1	0	1	1	0	1	0	0	0	1	1	1	0	1	0	1	1	1	1	1	0	1	0.652174	0.103825	0.755999	0.548348
6.75	0	0	0	0	0	1	0	1	1	1	1	0	1	1	0	1	0	0	0	1	1	1	0	0.478261	0.108893	0.587154	0.369368
6.8	1	0	0	1	1	0	1	0	0	0	1	1	1	0	1	0	1	0	1	0	0	1	1	0.521739	0.108893	0.630632	0.412846
6.85	0	1	1	0	0	1	0	0	0	0	1	1	1	1	0	1	0	1	1	1	1	0	1	0.565217	0.108065	0.673282	0.457152
6.9	1	0	0	0	0	0	1	0	1	1	0	1	1	0	1	0	1	0	0	1	0	1	0	0.434783	0.108065	0.542848	0.326718
6.95	0	1	1	1	1	0	0	1	0	0	1	1	0	1	0	1	0	1	1	0	1	0	1	0.565217	0.108065	0.673282	0.457152
7	1	0	0	0	0	1	0	0	0	1	1	1	1	0	1	0	1	0	0	1	0	1	0	0.434783	0.108065	0.542848	0.326718
7.05	0	1	0	1	1	0	1	1	0	0	1	1	1	1	0	1	0	1	1	1	1	0	1	0.652174	0.103825	0.755999	0.548348
7.1	1	0	1	0	0	0	0	0	0	0	0	0	1	0	1	0	1	0	1	1	1	1	0	0.391304	0.106389	0.497694	0.284915
7.15	0	1	0	1	0	0	0	1	1	0	1	1	1	1	0	1	0	1	0	1	0	1	1	0.565217	0.108065	0.673282	0.457152
7.2	1	0	1	0	1	1	1	0	0	1	1	1	1	0	1	0	1	0	1	0	1	1	1	0.652174	0.103825	0.755999	0.548348
7.25	0	1	0	1	0	0	0	0	1	0	0	0	0	1	0	1	0	1	1	1	0	0	0	0.347826	0.103825	0.451652	0.244001
7.3	1	0	1	0	0	0	0	0	0	1	1	1	1	0	1	0	1	0	0	1	1	1	1	0.521739	0.108893	0.630632	0.412846
7.35	0	1	0	1	1	1	1	1	1	0	1	1	1	1	0	1	0	1	1	0	1	1	1	0.73913	0.0957224	0.834853	0.643408
7.4	1	0	1	0	0	0	0	0	0	0	1	0	1	0	0	0	1	0	0	1	0	0	0	0.26087	0.0957224	0.356592	0.165147
7.45	0	1	0	1	1	0	1	0	1	1	0	1	0	1	1	1	0	1	1	1	1	1	1	0.695652	0.100305	0.795957	0.595347
7.5	1	0	1	0	0	0	0	0	0	0	1	1	1	0	0	0	1	0	1	0	1	1	0	0.391304	0.106389	0.497694	0.284915
7.55	0	1	0	1	0	1	0	1	1	0	1	1	0	1	1	1	0	0	0	1	0	0	1	0.521739	0.108893	0.630632	0.412846
7.6	1	0	1	0	1	0	1	0	0	1	0	1	1	0	0	0	1	1	1	1	1	1	1	0.608696	0.106389	0.715085	0.502306
7.65	0	1	0	1	0	1	0	1	0	0	1	1	1	1	1	1	0	0	0	1	1	0	0	0.521739	0.108893	0.630632	0.412846
7.7	1	0	1	0	1	0	0	0	1	1	0	1	1	0	0	0	1	0	1	0	0	1	1	0.478261	0.108893	0.587154	0.369368
7.75	0	1	0	1	0	0	1	0	0	0	1	1	1	1	1	1	0	1	1	1	1	0	0	0.565217	0.108065	0.673282	0.457152
7.8	1	0	0	0	1	1	0	1	0	0	0	1	0	0	0	0	1	0	0	0	0	1	1	0.347826	0.103825	0.451652	0.244001
7.85	0	1	1	0	0	0	1	0	0	0	1	1	1	1	1	1	0	1	1	1	1	0	1	0.608696	0.106389	0.715085	0.502306
7.9	1	0	0	1	1	0	0	0	1	1	0	1	1	0	0	0	1	0	1	1	0	1	0	0.478261	0.108893	0.587154	0.369368
7.95	0	1	1	0	0	1	1	1	0	0	1	0	1	1	1	1	0	1	0	0	1	1	1	0.608696	0.106389	0.715085	0.502306
8	1	0	0	1	1	0	0	0	0	0	1	1	0	0	0	0	1	0	1	1	0	0	0	0.347826	0.103825	0.451652	0.244001
8.05	0	1	0	0	0	0	0	1	1	0	0	1	1	1	1	1	0	1	1	1	1	1	1	0.608696	0.106389	0.715085	0.502306
8.1	1	0	1	1	1	0	1	0	0	1	1	1	1	0	0	0	1	0	0	0	0	0	1	0.478261	0.108893	0.587154	0.369368
8.15	0	1	0	0	0	1	0	0	0	0	0	1	1	1	1	1	0	0	1	1	1	1	1	0.521739	0.108893	0.630632	0.412846
8.2	1	0	1	0	1	0	1	1	1	1	1	1	0	0	0	0	1	1	1	1	1	0	0	0.608696	0.106389	0.715085	0.502306
8.25	0	1	0	1	0	1	0	0	0	0	0	1	1	1	1	1	0	0	1	0	0	1	1	0.478261	0.108893	0.587154	0.369368
8.3	1	0	1	0	1	0	1	0	0	1	1	1	1	0	0	0	1	0	1	1	1	0	0	0.521739	0.108893	0.630632	0.412846
8.35	0	1	0	1	0	1	0	1	1	0	1	0	1	1	1	1	0	1	0	1	1	1	1	0.652174	0.103825	0.755999	0.548348
8.4	1	0	1	0	1	0	1	0	0	0	1	1	0	0	0	0	0	0	1	1	0	1	0	0.391304	0.106389	0.497694	0.284915
8.45	0	1	0	1	0	1	0	1	0	1	1	1	1	1	1	0	1	0	0	1	1	0	1	0.608696	0.106389	0.715085	0.502306
8.5	1	0	1	0	1	0	0	0	1	0	1	1	1	0	0	1	0	1	1	1	1	1	0	0.565217	0.108065	0.673282	0.457152
8.55	0	1	0	1	0	0	1	1	0	0	0	0	1	1	1	0	1	0	1	0	1	0	1	0.478261	0.108893	0.587154	0.369368
8.6	1	0	1	0	1	1	0	0	1	0	1	1	1	0	0	1	0	1	0	1	0	1	1	0.565217	0.108065	0.673282	0.457152
8.65	0	1	0	1	0	0	1	0	0	1	1	1	0	1	1	0	1	0	1	1	1	0	0	0.521739	0.108893	0.630632	0.412846
8.7	1	0	1	0	0	1	0	1	0	0	1	1	1	0	0	1	0	0	0	0	1	1	1	0.478261	0.108893	0.587154	0.369368
8.75	0	1	0	1	1	0	0	0	1	1	0	1	0	1	1	0	1	1	1	1	0	1	0	0.565217	0.108065	0.673282	0.457152
8.8	1	0	1	0	0	0	0	1	0	0	1	1	1	0	0	1	0	0	1	1	1	0	1	0.478261	0.108893	0.587154	0.369368
8.85	0	0	0	0	1	1	1	0	0	0	0	0	1	1	1	0	1	1	0	1	1	1	1	0.521739	0.108893	0.630632	0.412846
8.9	1	1	1	1	0	0	0	0	1	1	1	1	1	0	0	1	0	0	1	0	0	1	0	0.521739	0.108893	0.630632	0.412846
8.95	0	0	0	0	1	0	1	1	0	0	0	1	0	1	1	0	1	1	1	1	1	1	1	0.565217	0.108065	0.673282	0.457152
9	1	1	0	0	0	0	0	0	0	0	1	0	1	0	0	1	0	0	0	1	0	0	0	0.26087	0.0957224	0.356592	0.165147
9.05	0	0	1	1	1	1	0	0	1	0	0	1	0	1	1	0	1	1	1	0	1	1	1	0.608696	0.106389	0.715085	0.502306
9.1	1	1	0	0	0	0	1	1	0	1	1	1	1	0	0	1	0	0	1	1	0	1	0	0.521739	0.108893	0.630632	0.412846
9.15	0	0	0	1	0	1	0	0	1	0	0	0	1	1	1	0	0	0	0	0	1	0	1	0.347826	0.103825	0.451652	0.244001
9.2	1	1	1	0	1	0	0	1	0	0	1	1	1	0	0	1	1	1	1	1	0	1	0	0.608696	0.106389	0.715085	0.502306
9.25	0	0	0	1	0	0	1	0	1	0	0	0	0	1	1	0	0	0	1	1	1	0	1	0.391304	0.106389	0.497694	0.284915
9.3	1	1	1	0	0	1	0	0	0	1	1	1	1	0	0	1	1	1	0	0	0	1	0	0.521739	0.108893	0.630632	0.412846
9.35	0	0	0	1	1	0	1	0	1	0	1	1	1	1	1	0	0	0	1	1	1	0	1	0.565217	0.108065	0.673282	0.457152
9.4	1	1	1	0	0	0	0	1	0	1	1	0	1	0	0	1	1	1	0	1	1	1	0	0.565217	0.108065	0.673282	0.457152
9.45	0	0	0	0	1	0	1	0	0	0	0	1	1	1	1	0	0	0	1	0	0	1	1	0.391304	0.106389	0.497694	0.284915
9.5	1	1	1	1	0	0	0	1	1	0	1	1	0	0	0	1	0	1	1	1	1	0	0	0.565217	0.108065	0.673282	0.457152
9.55	0	0	0	0	1	1	0	0	0	0	1	1	1	1	1	0	1	0	0	0	0	1	1	0.434783	0.108065	0.542848	0.326718
9.6	1	1	1	0	0	0	1	0	0	1	0	0	0	0	0	1	0	0	1	1	1	0	1	0.434783	0.108065	0.542848	0.326718
9.65	0	0	0	1	1	1	0	0	1	0	0	1	1	1	1	0	1	1	0	1	1	1	0	0.565217	0.108065	0.673282	0.457152
9.7	1	0	1	0	0	0	1	1	0	1	1	0	1	0	0	1	0	0	1	0	0	0	1	0.434783	0.108065	0.542848	0.326718
9.75	0	1	0	0	0	0	0	0	0	0	1	1	1	1	1	0	1	1	0	1	1	1	0	0.478261	0.108893	0.587154	0.369368
9.8	1	0	1	1	1	1	1	0	1	0	1	1	0	0	0	0	0	0	1	0	0	0	1	0.478261	0.108893	0.587154	0.369368
9.85	0	1	0	0	0	0	0	1	0	0	0	1	1	1	1	1	1	0	1	1	1	1	0	0.521739	0.108893	0.630632	0.412846
9.9	1	0	1	0	1	1	1	0	0	0	1	0	1	0	0	0	0	1	1	0	1	0	1	0.478261	0.108893	0.587154	0.369368
9.95	0	1	0	1	0	0	0	1	1	1	1	1	1	1	1	1	1	0	0	1	0	1	1	0.652174	0.103825	0.755999	0.548348
10	1	0	1	0	0	1	1	0	0	0	1	1	0	0	0	0	0	1	1	0	1	0	1	0.434783	0.108065	0.542848	0.326718
