# Supplementary material for: Elevated pyramidal cell firing orchestrates arteriolar vasoconstriction through COX-2-derived prostaglandin E2 signaling
Source: eLife. 2025 Apr 23;13:RP102424. doi: 10.7554/eLife.102424 (PMC12017770; doi:10.7554/eLife.102424)
Supplement: Figure 1—source data 2. [file elife-102424-fig1-data2.xls]

## Sheet: 1Hz
Stimulation
Time (s)	BGBV-225	BGBV-227	BGBV-229	BGBV-230
0	11.3747	19.8245	14.2996	19.1745
1	11.6997	19.8245	14.9496	18.5245
2	11.3747	19.8245	14.9496	18.5245
3	11.6997	19.8245	14.9496	18.5245
4	11.6997	19.4995	14.6246	18.5245
5	11.6997	19.8245	14.6246	18.5245
6	11.6997	19.4995	14.6246	18.8495
7	12.0247	19.8245	14.2996	18.5245
8	11.6997	19.8245	14.6246	18.5245
9	12.0247	19.8245	14.6246	18.5245
10	12.0247	19.8245	14.6246	18.5245
11	11.6997	19.8245	14.6246	18.5245
12	11.6997	19.4995	14.6246	18.8495
13	11.6997	19.8245	14.6246	18.5245
14	11.6997	19.8245	14.2996	18.5245
15	11.6997	20.1495	14.6246	18.8495
16	12.0247	19.8245	13.9747	18.8495
17	12.0247	19.8245	14.2996	18.5245
18	12.0247	19.8245	14.6246	18.5245
19	11.6997	19.8245	14.6246	18.5245
20	11.6997	19.8245	14.2996	18.5245
21	11.6997	19.8245	14.6246	18.5245
22	12.0247	19.8245	14.9496	18.8495
23	12.0247	19.8245	14.6246	18.5245
24	11.6997	19.4995	14.6246	18.8495
25	11.6997	19.8245	14.6246	18.5245
26	11.6997	19.8245	14.9496	18.8495
27	12.0247	19.8245	14.2996	18.8495
28	11.6997	19.8245	14.9496	18.5245
29	11.6997	19.8245	14.6246	18.5245
30	12.0247	19.8245	14.6246	18.5245
31	12.0247	19.8245	14.2996	18.8495
32	12.0247	19.8245	14.6246	18.8495
33	11.6997	20.1495	14.2996	18.8495
34	12.0247	19.8245	14.6246	18.5245
35	12.0247	19.8245	14.6246	18.8495
36	11.6997	19.8245	14.2996	18.8495
37	11.6997	19.4995	14.6246	18.5245
38	12.3497	19.8245	14.9496	18.8495
39	12.0247	19.8245	14.9496	18.5245
40	12.0247	19.8245	14.6246	18.8495
41	12.0247	19.8245	14.2996	18.5245
42	12.0247	19.8245	14.6246	18.5245
43	12.0247	19.4995	14.6246	18.5245
44	12.3497	19.8245	14.9496	18.5245
45	12.0247	19.8245	15.2746	18.5245
46	12.0247	19.4995	14.6246	18.5245
47	11.6997	19.8245	14.6246	18.5245
48	12.0247	19.8245	14.6246	18.8495
49	11.6997	19.8245	14.6246	18.8495
50	12.0247	19.8245	14.6246	18.5245
51	12.0247	20.1495	14.6246	18.5245
52	12.3497	19.8245	14.9496	18.5245
53	11.6997	19.8245	14.6246	18.5245
54	12.0247	19.8245	14.6246	18.8495
55	11.6997	19.4995	14.6246	18.5245
56	12.0247	19.8245	14.6246	18.8495
57	12.0247	19.8245	14.6246	18.5245
58	12.0247	19.8245	14.9496	18.8495
59	12.0247	20.1495	14.6246	18.8495
60	12.0247	20.1495	14.6246	18.8495
61	12.0247	19.8245	14.9496	18.8495
62	12.0247	19.8245	14.6246	18.8495
63	12.0247	20.1495	14.6246	18.5245
64	12.0247	19.8245	14.6246	18.8495
65	12.0247	19.8245	14.6246	18.5245
66	12.3497	19.8245	14.9496	18.5245
67	12.3497	19.8245	14.6246	18.8495
68	12.3497	19.8245	14.6246	18.1995
69	12.3497	19.4995	14.6246	18.8495
70	11.6997	19.4995	14.2996	18.5245
71	12.0247	19.8245	14.6246	18.1995
72	12.3497	20.1495	14.9496	18.5245
73	12.3497	19.8245	14.6246	18.5245
74	12.0247	19.8245	14.6246	18.8495
75	12.0247	19.4995	14.6246	18.5245
76	12.6747	19.8245	14.6246	18.1995
77	12.0247	19.8245	14.6246	18.1995
78	12.3497	20.1495	14.6246	18.5245
79	12.3497	19.8245	14.9496	18.5245
80	12.3497	20.1495	14.6246	18.5245
81	12.0247	20.1495	14.2996	18.5245
82	12.3497	19.4995	14.6246	18.1995
83	12.0247	20.1495	14.2996	18.5245
84	12.0247	20.1495	14.9496	18.5245
85	12.0247	19.8245	14.9496	18.1995
86	12.3497	19.8245	14.6246	18.5245
87	12.0247	19.8245	14.2996	18.8495
88	12.3497	20.1495	14.2996	18.5245
89	12.3497	19.8245	14.2996	18.8495
90	12.3497	19.8245	14.6246	18.5245
91	12.3497	20.1495	14.2996	18.8495
92	12.3497	19.8245	14.2996	18.5245
93	12.0247	19.8245	14.2996	18.5245
94	12.3497	20.1495	14.9496	18.5245
95	12.3497	20.1495	14.6246	18.5245
96	11.6997	19.4995	14.6246	18.8495
97	12.0247	19.8245	14.6246	18.5245
98	12.0247	20.1495	14.6246	18.8495
99	12.0247	19.4995	14.6246	18.5245
100	12.0247	19.8245	14.9496	18.8495
101	12.0247	19.8245	14.9496	18.5245
102	12.0247	19.8245	14.6246	18.5245
103	12.0247	20.1495	14.2996	18.5245
104	11.6997	19.4995	14.2996	18.8495
105	11.6997	19.8245	14.2996	18.8495
106	11.6997	19.8245	14.6246	18.8495
107	11.6997	19.8245	14.6246	18.5245
108	12.0247	19.8245	14.2996	18.5245
109	12.0247	19.4995	14.6246	18.1995
110	12.0247	19.4995	14.6246	18.5245
111	12.0247	20.1495	14.9496	18.5245
112	11.6997	19.8245	14.9496	18.8495
113	11.6997	19.8245	14.2996	18.8495
114	12.0247	19.8245	14.6246	18.8495
115	12.0247	19.8245	14.2996	18.8495
116	12.3497	19.8245	14.6246	18.1995
117	12.0247	20.1495	14.9496	18.8495
118	12.0247	19.8245	14.2996	18.1995
119	12.0247	19.8245	14.9496	18.8495
120	12.0247	19.8245	14.6246	18.5245
121	12.0247	20.1495	14.6246	18.8495
122	12.0247	20.1495	14.6246	18.8495
123	12.0247	19.8245	14.2996	18.5245
124	12.0247	19.8245	14.9496	18.5245
125	12.0247	19.8245	14.2996	18.1995
126	12.0247	19.8245	14.2996	18.8495
127	12.0247	19.4995	14.6246	18.5245
128	12.0247	19.8245	14.6246	18.5245
129	12.3497	19.8245	14.6246	18.5245
130	12.0247	19.8245	14.6246	18.5245
131	11.6997	19.4995	14.6246	18.8495
132	12.0247	20.1495	14.6246	18.8495
133	12.0247	19.8245	14.6246	18.5245
134	12.0247	19.8245	14.2996	18.8495
135	12.0247	19.8245	14.6246	18.8495
136	11.6997	19.4995	14.6246	18.8495
137	12.0247	20.1495	14.6246	18.8495
138	11.6997	19.8245	14.6246	18.5245
139	11.6997	19.8245	14.6246	18.8495
140	11.6997	19.8245	14.2996	18.5245
141	11.6997	20.1495	14.6246	18.5245
142	11.6997	19.8245	14.6246	18.5245
143	11.3747	19.8245	14.6246	18.8495
144	11.3747	19.4995	14.6246	18.8495
145	11.3747	19.4995	14.6246	18.5245
146	11.6997	19.4995	14.6246	18.8495
147	11.3747	19.4995	14.6246	18.8495
148	11.3747	20.1495	14.6246	18.5245
149	11.6997	19.4995	14.6246	18.8495
150	11.3747	19.4995	14.6246	18.5245
151	12.0247	19.8245	14.9496	18.5245
152	11.0497	19.8245	14.9496	18.5245
153	11.3747	19.4995	14.6246	18.8495
154	11.3747	19.4995	14.9496	18.8495
155	11.6997	19.4995	14.9496	18.8495
156	11.6997	19.4995	14.6246	18.8495
157	11.3747	19.4995	14.9496	18.5245
158	11.3747	19.4995	14.9496	18.5245
159	11.3747	19.4995	14.9496	18.8495
160	11.6997	19.4995	14.2996	18.8495
161	11.6997	19.8245	14.2996	18.5245
162	11.6997	19.8245	14.6246	18.8495
163	11.6997	19.8245	14.6246	18.5245
164	11.6997	20.1495	14.6246	18.5245
165	11.6997	19.8245	14.9496	18.8495
166	11.6997	19.8245	14.6246	18.8495
167	11.6997	19.4995	14.6246	18.8495
168	11.6997	19.8245	14.9496	18.8495
169	12.0247	19.4995	14.9496	18.5245
170	12.0247	19.8245	14.9496	18.8495
171	12.0247	19.8245	14.6246	18.8495
172	12.0247	20.1495	14.9496	18.5245
173	11.6997	19.4995	14.6246	18.8495
174	11.6997	19.8245	14.2996	18.5245
175	11.6997	19.8245	14.9496	18.8495
176	12.0247	19.8245	14.6246	18.8495
177	12.0247	19.8245	14.6246	18.8495
178	12.0247	19.8245	14.9496	18.8495
179	11.6997	19.4995	14.6246	18.8495
180	12.0247	19.8245	14.6246	18.8495
181	12.0247	19.4995	14.6246	18.8495
182	12.0247	19.8245	14.6246	18.8495
183	11.6997	19.8245	14.6246	18.8495
184	12.0247	19.4995	14.6246	18.8495
185	12.0247	19.8245	14.6246	18.5245
186	12.0247	19.8245	14.9496	18.8495
187	12.0247	19.4995	14.6246	18.5245
188	12.0247	19.4995	14.6246	18.8495
189	12.0247	19.8245	14.6246	18.5245
190	11.6997	19.8245	14.6246	18.8495
191	12.0247	19.4995	14.6246	18.5245
192	12.0247	19.8245	14.6246	18.8495
193	12.0247	19.8245	14.6246	18.8495
194	12.0247	19.8245	14.6246	18.8495
195	12.0247	19.8245	14.9496	18.5245
196	12.0247	19.8245	14.6246	18.5245
197	12.0247	19.4995	14.6246	18.8495
198	12.0247	19.4995	14.6246	18.8495
199	12.0247	19.8245	14.6246	18.5245
200	12.0247	19.8245	14.9496	18.8495
201	12.0247	19.4995	14.6246	18.5245
202	12.0247	19.4995	14.6246	18.8495
203	12.0247	19.4995	14.6246	18.8495
204	12.0247	19.8245	14.6246	18.8495
205	11.6997	19.8245	14.6246	18.5245
206	12.0247	19.8245	14.9496	18.8495
207	12.0247	19.4995	14.2996	18.8495
208	12.0247	19.8245	14.2996	18.8495
209	12.0247	19.8245	14.6246	18.8495
210	12.0247	19.8245	14.6246	18.8495
211	12.0247	19.8245	14.6246	18.8495
212	11.6997	19.8245	14.6246	18.8495
213	12.0247	19.8245	14.6246	18.8495
214	12.0247	19.4995	14.6246	18.5245
215	12.0247	19.8245	14.6246	18.8495
216	12.0247	19.8245	14.9496	18.8495
217	12.0247	19.8245	14.9496	18.8495
218	12.0247	19.8245	14.2996	18.8495
219	12.0247	19.8245	14.6246	18.8495
220	12.0247	19.8245	14.6246	18.8495
221	12.0247	20.1495	14.6246	18.8495
222	12.3497	20.1495	14.6246	18.8495
223	12.0247	19.4995	14.6246	18.5245
224	12.0247	19.8245	14.9496	18.8495
225	12.0247	19.8245	14.9496	18.8495
226	12.0247	19.8245	14.2996	18.5245
227	12.3497	19.8245	14.6246	18.5245
228	12.0247	19.8245	14.9496	18.8495
229	11.6997	19.8245	14.6246	18.5245
230	11.6997	19.8245	14.6246	18.8495
231	11.6997	19.8245	14.9496	18.8495
232	12.0247	19.8245	14.9496	19.1745
233	12.0247	19.8245	14.9496	18.8495
234	11.6997	20.1495	14.9496	18.8495
235	11.6997	19.4995	14.9496	18.5245
236	11.6997	19.8245	14.9496	18.5245
237	11.6997	19.8245	14.6246	19.1745
238	11.3747	19.4995	14.9496	18.8495
239	11.6997	19.4995	14.9496	18.5245
240	11.6997	20.1495	14.9496	18.8495
241	11.3747	19.8245	14.9496	19.1745
242	11.6997	19.8245	14.9496	18.5245
243	11.3747	19.4995	14.6246	18.8495
244	11.6997	19.8245	14.9496	18.8495
245	11.6997	19.8245	14.9496	18.8495
246	11.6997	20.1495	14.6246	18.8495
247	12.0247	19.8245	14.9496	18.5245
248	12.0247	19.8245	14.9496	18.8495
249	11.6997	19.4995	14.9496	18.8495
250	12.0247	19.8245	15.2746	18.8495
251	12.0247	19.8245	14.9496	18.8495
252	12.0247	19.8245	14.9496	18.8495
253	12.0247	19.8245	14.9496	18.5245
254	12.0247	19.8245	14.6246	18.8495
255	11.6997	19.8245	14.6246	18.5245
256	11.6997	19.4995	14.2996	18.8495
257	12.0247	19.8245	14.9496	19.1745
258	12.0247	19.8245	14.9496	19.1745
259	12.0247	19.8245	14.6246	18.8495
260	12.0247	19.4995	15.2746	18.8495
261	12.3497	19.8245	14.6246	18.5245
262	12.3497	19.8245	14.6246	18.8495
263	12.0247	19.4995	14.6246	18.8495
264	12.0247	19.8245	14.9496	18.8495
265	12.0247	19.8245	14.6246	18.8495
266	12.0247	19.8245	14.6246	18.5245
267	12.0247	19.8245	14.9496	18.8495
268	12.0247	19.4995	14.9496	18.8495
269	12.3497	19.8245	14.6246	18.8495
270	12.3497	19.4995	14.6246	18.8495
271	12.3497	19.8245	14.9496	19.1745
272	12.3497	19.8245	14.6246	19.1745
273	12.0247	19.8245	14.9496	18.8495
274	12.3497	19.8245	15.2746	18.5245
275	12.0247	19.8245	14.9496	18.5245
276	12.0247	19.8245	15.2746	18.8495
277	12.3497	19.8245	14.9496	19.1745
278	12.3497	19.8245	14.9496	19.1745
279	12.3497	19.8245	14.6246	19.1745
280	12.3497	19.8245	14.9496	18.8495
281	12.0247	19.8245	14.9496	19.1745
282	12.3497	19.8245	14.6246	19.1745
283	12.0247	19.8245	14.6246	18.8495
284	12.3497	19.8245	14.9496	18.8495
285	12.3497	19.8245	14.9496	19.1745
286	12.3497	20.1495	14.9496	18.8495
287	12.3497	19.8245	14.6246	19.1745
288	12.3497	19.8245	14.9496	19.1745
289	12.6747	19.8245	14.9496	18.8495
290	12.6747	19.8245	14.9496	18.8495
291	12.3497	19.8245	14.6246	18.8495
292	12.3497	19.8245	14.9496	19.1745
293	12.3497	19.4995	14.9496	19.1745
294	12.0247	19.8245	14.9496	19.1745
295	12.0247	19.8245	14.9496	19.1745
296	12.0247	20.1495	14.9496	18.8495
297	12.0247	19.4995	14.9496	19.1745
298	12.3497	19.8245	14.9496	18.8495
299	12.0247	19.8245	14.9496	19.1745
300	12.0247	19.8245	14.9496	19.1745
301	12.0247	19.8245	15.2746	19.1745
302	12.0247	19.8245	14.9496	19.1745
303	12.0247	20.1495	14.9496	18.5245
304	12.3497	20.1495	14.9496	19.1745
305	12.0247	19.8245	14.6246	18.8495
306	12.3497	19.8245	14.9496	19.1745
307	12.0247	19.8245	15.2746	19.4995
308	12.0247	19.8245	14.9496	19.1745
309	12.0247	19.8245	14.9496	18.8495
310	12.0247	19.8245	14.9496	18.8495
311	12.0247	19.8245	15.2746	19.1745
312	12.0247	19.8245	14.9496	19.1745
313	12.0247	19.8245	14.9496	19.1745
314	12.0247	20.1495	14.9496	19.1745
315	11.6997	19.8245	15.2746	19.1745
316	12.0247	19.8245	14.6246	18.8495
317	12.0247	19.8245	14.9496	19.1745
318	12.3497	19.8245	14.9496	19.1745
319	12.0247	19.8245	14.9496	19.1745
320	12.0247	19.8245	14.9496	18.8495
321	12.0247	19.8245	14.6246	19.1745
322	12.0247	19.8245	14.6246	19.1745
323	12.0247	19.8245	14.9496	19.1745
324	12.0247	19.8245	14.9496	19.1745
325	11.6997	19.8245	14.9496	19.1745
326	11.3747	19.8245	15.2746	19.1745
327	11.6997	19.8245	14.9496	19.1745
328	11.6997	19.4995	14.9496	19.1745
329	11.6997	19.8245	15.2746	18.8495
330	11.6997	19.4995	14.9496	18.8495
331	12.0247	19.8245	14.6246	18.8495
332	12.0247	19.8245	14.9496	18.8495
333	11.6997	19.8245	14.9496	19.1745
334	12.0247	19.8245	14.6246	19.1745
335	12.0247	20.1495	14.9496	18.8495
336	12.0247	19.8245	14.9496	18.8495
337	11.6997	19.8245	14.9496	19.1745
338	11.6997	19.8245	14.9496	19.1745
339	11.6997	19.8245	14.9496	18.8495
340	12.0247	19.8245	14.9496	19.1745
341	12.0247	19.8245	14.9496	18.8495
342	11.6997	19.8245	14.9496	19.1745
343	11.6997	19.8245	14.9496	19.1745
344	11.6997	19.8245	14.9496	18.8495
345	11.6997	19.8245	14.9496	19.1745
346	12.0247	19.8245	14.9496	19.1745
347	12.0247	19.8245	14.9496	19.1745
348	12.0247	19.4995	14.9496	18.8495
349	11.6997	20.1495	14.9496	19.1745
350	11.6997	19.8245	14.9496	18.8495
351	11.6997	19.8245	14.9496	19.1745
352	11.3747	19.8245	14.6246	18.8495
353	11.6997	19.8245	14.6246	19.1745
354	11.6997	19.4995	14.6246	18.8495
355	11.6997	19.8245	15.2746	19.1745
356	11.6997	19.8245	14.9496	19.1745
357	11.6997	19.8245	14.6246	19.1745
358	11.3747	19.8245	14.9496	19.1745
359	11.6997	19.8245	14.9496	19.1745
360	11.6997	19.4995	14.9496	18.8495
361	12.0247	19.8245	14.9496	18.5245
362	12.0247	19.4995	14.6246	19.1745
363	11.6997	19.8245	14.6246	18.8495
364	12.0247	19.4995	14.9496	18.8495
365	12.0247	19.4995	14.9496	19.1745
366	11.6997	19.8245	14.6246	18.8495
367	12.0247	19.8245	14.6246	18.8495
368	11.6997	19.8245	14.6246	19.1745
369	11.6997	19.8245	14.6246	18.8495
370	11.6997	19.8245	14.9496	18.8495
371	11.6997	19.8245	14.9496	18.8495
372	11.6997	19.4995	14.9496	18.8495
373	11.6997	20.1495	14.6246	18.8495
374	12.0247	19.8245	14.9496	19.1745
375	11.6997	19.4995	14.6246	18.8495
376	11.6997	20.1495	14.6246	18.8495
377	12.0247	19.4995	14.6246	18.8495
378	12.0247	20.1495	14.6246	18.8495
379	12.0247	19.8245	14.6246	19.1745
380	11.6997	19.8245	14.9496	18.8495
381	11.6997	19.8245	14.6246	18.8495
382	11.6997	20.1495	14.6246	19.1745
383	11.6997	19.8245	14.6246	18.8495
384	11.6997	20.1495	14.6246	18.8495
385	12.0247	19.4995	14.9496	18.8495
386	11.6997	19.4995	14.9496	18.8495
387	11.6997	19.8245	14.9496	18.8495
388	11.6997	19.8245	14.6246	18.8495
389	11.6997	20.1495	14.6246	18.8495
390	11.6997	19.8245	14.9496	18.8495
391	11.6997	19.8245	14.9496	18.8495
392	12.0247	19.4995	14.6246	18.8495
393	11.6997	19.4995	14.9496	18.8495
394	12.0247	19.8245	14.6246	18.8495
395	12.0247	20.1495	14.6246	18.8495
396	12.0247	19.8245	14.9496	19.1745
397	11.6997	19.8245	14.9496	18.8495
398	11.6997	19.4995	14.6246	19.1745
399	11.6997	20.1495	14.2996	19.1745
400	11.6997	19.8245	14.9496	18.8495
401	11.6997	19.8245	14.9496	18.8495
402	11.3747	19.8245	14.9496	18.8495
403	11.6997	19.8245	14.9496	18.8495
404	11.6997	19.8245	14.9496	19.1745
405	11.3747	20.1495	14.6246	18.8495
406	11.3747	19.4995	14.9496	18.8495
407	12.0247	19.8245	14.9496	19.1745
408	11.6997	19.8245	14.6246	18.8495
409	11.3747	20.1495	14.9496	18.8495
410	11.3747	19.8245	14.9496	18.8495
411	11.3747	20.1495	14.9496	18.8495
412	11.6997	20.1495	14.9496	18.8495
413	11.3747	20.1495	14.9496	19.1745
414	12.0247	19.8245	14.6246	19.1745
415	11.3747	20.1495	14.6246	18.8495
416	11.3747	19.8245	14.6246	19.1745
417	12.0247	19.8245	14.6246	18.8495
418	11.3747	20.1495	14.9496	18.8495
419	12.0247	20.1495	14.2996	18.8495
420	11.3747	19.8245	14.6246	18.8495
421	11.6997	19.8245	14.9496	18.8495
422	11.6997	20.1495	14.2996	18.8495
423	11.6997	20.1495	14.6246	18.8495
424	11.6997	19.8245	14.9496	19.4995
425	11.6997	20.1495	14.9496	18.8495
426	11.6997	19.4995	14.9496	19.1745
427	11.6997	19.8245	14.6246	18.8495
428	11.6997	19.8245	14.9496	19.1745
429	11.6997	19.8245	14.9496	19.1745
430	11.3747	20.1495	14.9496	19.1745
431	11.6997	19.8245	14.6246	18.8495
432	11.6997	19.8245	14.6246	19.1745
433	11.6997	19.8245	14.6246	18.8495
434	11.6997	19.8245	15.2746	19.1745
435	12.0247	19.8245	14.6246	18.8495
436	11.6997	20.1495	14.9496	19.1745
437	12.0247	19.8245	14.9496	18.8495
438	12.0247	19.8245	14.6246	18.8495
439	11.6997	19.8245	14.9496	19.1745
440	11.6997	19.4995	14.6246	19.1745
441	11.6997	19.8245	14.9496	18.8495
442	11.6997	19.8245	14.6246	19.1745
443	11.6997	19.8245	14.9496	19.1745
444	11.6997	20.1495	14.6246	19.1745
445	11.6997	19.8245	14.6246	19.1745
446	11.6997	19.4995	14.9496	19.1745
447	11.6997	19.4995	14.6246	19.1745
448	11.3747	19.8245	14.9496	19.1745
449	11.6997	19.8245	14.6246	19.1745
450	11.6997	19.8245	14.6246	19.1745
451	11.6997	19.8245	14.6246	18.8495
452	11.6997	19.8245	14.9496	19.1745
453	11.6997	19.8245	14.6246	19.1745
454	11.3747	19.8245	14.6246	19.1745
455	11.6997	19.8245	14.6246	19.4995
456	11.3747	19.8245	14.6246	19.4995
457	12.0247	19.8245	14.9496	18.8495
458	11.6997	19.8245	14.6246	19.4995
459	11.3747	19.8245	14.6246	18.8495
460	12.0247	19.8245	14.6246	19.1745
461	11.3747	19.8245	14.6246	19.1745
462	11.6997	19.8245	14.9496	19.1745
463	12.0247	20.1495	14.6246	18.8495
464	12.0247	19.8245	14.6246	19.1745
465	12.0247	19.4995	14.6246	18.8495
466	11.3747	19.4995	14.6246	19.1745
467	11.6997	19.4995	14.6246	18.8495
468	11.6997	19.8245	14.6246	19.1745
469	11.3747	20.1495	14.6246	19.1745
470	11.3747	19.4995	14.6246	19.1745
471	11.3747	19.8245	14.6246	18.8495
472	11.3747	19.8245	14.9496	19.1745
473	11.6997	19.8245	14.9496	19.1745
474	11.6997	19.8245	14.9496	19.4995
475	11.6997	19.8245	14.6246	19.1745
476	11.3747	19.8245	14.6246	19.1745
477	11.6997	19.8245	14.6246	19.1745
478	11.3747	19.8245	14.9496	19.1745
479	11.6997	19.8245	14.6246	18.8495
480	12.0247	20.1495	14.6246	19.1745
481	12.0247	19.8245	14.6246	19.1745
482	12.0247	19.8245	14.6246	18.8495
483	12.0247	19.8245	14.6246	19.4995
484	12.0247	19.4995	14.6246	19.1745
485	12.0247	19.4995	14.6246	19.1745
486	12.0247	19.8245	14.6246	19.1745
487	11.3747	19.8245	14.6246	19.1745
488	11.6997	19.4995	14.6246	19.1745
489	11.6997	19.8245	14.6246	19.1745
490	12.0247	19.8245	14.6246	19.1745
491	12.0247	19.8245	14.6246	19.4995
492	11.6997	19.8245	14.6246	19.4995
493	11.6997	19.8245	14.9496	19.1745
494	11.6997	19.8245	14.6246	19.1745
495	12.0247	19.4995	14.6246	19.4995
496	12.0247	19.4995	14.6246	18.8495
497	11.6997	20.1495	14.6246	19.1745
498	11.6997	20.1495	14.6246	18.8495
499	12.0247	19.8245	14.6246	19.4995
500	11.6997	20.1495	14.6246	19.8245
501	11.6997	20.1495	14.6246	19.1745
502	11.6997	19.8245	14.6246	18.8495
503	11.6997	19.8245	14.6246	19.4995
504	11.3747	19.8245	14.6246	19.1745
505	11.3747	20.1495	14.6246	19.4995
506	11.3747	19.8245	14.2996	19.1745
507	11.6997	19.8245	14.2996	19.4995
508	11.6997	19.4995	14.6246	19.1745
509	11.6997	19.8245	14.6246	19.1745
510	11.3747	19.8245	14.6246	19.4995
511	11.3747	19.8245	14.6246	19.1745
512	12.0247	19.8245	14.6246	19.1745
513	12.0247	19.8245	14.6246	19.1745
514	11.6997	19.8245	14.9496	19.4995
515	11.6997	20.1495	14.6246	18.8495
516	12.0247	19.8245	14.9496	19.1745
517	11.6997	19.8245	14.6246	19.1745
518	11.6997	19.8245	14.6246	19.4995
519	11.6997	20.1495	14.9496	19.1745
520	12.0247	19.8245	14.6246	19.1745
521	11.6997	19.8245	14.6246	19.4995
522	12.0247	19.8245	14.9496	19.1745
523	12.0247	19.8245	14.9496	19.1745
524	11.6997	19.8245	14.6246	19.1745
525	11.6997	19.4995	14.9496	19.1745
526	12.0247	20.1495	14.6246	19.1745
527	11.6997	20.1495	14.2996	19.1745
528	12.0247	19.8245	14.6246	19.1745
529	11.6997	19.8245	14.9496	19.1745
530	11.6997	19.8245	14.6246	19.1745
531	11.6997	19.8245	14.9496	19.1745
532	11.6997	19.8245	14.9496	19.1745
533	11.6997	20.1495	14.6246	19.1745
534	12.0247	19.8245	14.6246	19.4995
535	12.0247	19.8245	14.6246	19.1745
536	11.6997	19.8245	14.6246	19.1745
537	11.6997	19.8245	14.6246	19.1745
538	11.6997	19.8245	14.6246	19.1745
539	11.6997	19.8245	14.9496	19.1745
540	11.6997	19.8245	14.9496	19.1745
541	11.6997	19.8245	14.9496	19.1745
542	11.6997	20.1495	14.9496	19.1745
543	11.6997	19.8245	14.2996	19.1745
544	12.0247	19.8245	14.6246	19.4995
545	11.6997	19.8245	14.9496	19.4995
546	11.6997	19.8245	14.9496	19.1745
547	11.6997	19.8245	14.6246	19.1745
548	12.0247	19.8245	14.6246	19.1745
549	11.6997	19.8245	14.9496	19.1745
550	11.6997	19.8245	14.2996	19.1745
551	11.6997	19.8245	14.9496	19.1745
552	12.0247	19.8245	14.6246	19.1745
553	11.6997	19.8245	14.6246	19.4995
554	11.6997	19.8245	14.6246	18.8495
555	11.6997	19.8245	14.2996	19.1745
556	11.6997	19.4995	14.6246	19.1745
557	12.0247	19.8245	14.6246	19.1745
558	12.0247	19.8245	14.6246	19.1745
559	11.3747	19.8245	14.6246	19.1745
560	12.0247	19.4995	14.9496	19.1745
561	12.0247	19.8245	14.2996	19.1745
562	12.0247	19.4995	14.6246	19.1745
563	11.3747	19.8245	14.6246	19.1745
564	11.3747	19.8245	14.6246	19.1745
565	12.0247	19.8245	14.2996	19.4995
566	12.0247	19.8245	14.6246	19.1745
567	12.0247	19.4995	14.6246	19.1745
568	12.0247	19.4995	14.2996	19.1745
569	12.0247	19.4995	14.6246	19.1745
570	12.0247	19.4995	14.9496	18.8495
571	12.0247	19.4995	14.6246	19.1745
572	12.0247	19.8245	14.6246	19.4995
573	12.0247	19.4995	14.6246	19.1745
574	12.0247	19.8245	14.6246	19.1745
575	12.0247	19.4995	14.6246	18.8495
576	12.0247	19.4995	14.6246	19.1745
577	12.0247	19.4995	14.9496	18.8495
578	12.0247	19.8245	14.6246	19.1745
579	12.0247	19.4995	14.6246	19.1745
580	12.0247	19.4995	14.6246	19.1745
581	12.0247	19.4995	14.6246	19.1745
582	11.6997	19.8245	14.6246	19.1745
583	12.0247	19.8245	14.6246	19.1745
584	12.0247	19.8245	14.6246	19.1745
585	12.0247	19.1745	14.6246	19.1745
586	12.0247	19.8245	14.6246	19.1745
587	12.0247	19.8245	14.2996	19.1745
588	12.0247	19.4995	14.6246	19.1745
589	12.3497	19.4995	14.9496	19.1745
590	12.0247	19.4995	14.6246	19.4995
591	12.3497	19.4995	14.6246	19.1745
592	12.0247	19.4995	14.2996	19.1745
593	12.0247	19.4995	14.6246	19.1745
594	12.0247	19.8245	14.6246	19.1745
595	12.0247	19.8245	14.9496	19.1745
596	12.0247	19.4995	14.6246	19.4995
597	12.0247	19.8245	14.2996	19.1745
598	12.0247	19.8245	14.6246	19.1745
599	12.3497	19.8245	14.6246	19.1745
600	12.0247	19.4995	14.9496	19.1745
601	12.0247	19.8245	14.6246	18.8495
602	11.6997	19.4995	14.6246	19.1745
603	12.0247	19.4995	14.9496	19.1745
604	12.0247	19.8245	14.6246	19.4995
605	12.0247	19.8245	14.6246	19.1745
606	12.0247	19.8245	14.6246	19.1745
607	12.0247	19.8245	14.6246	18.8495
608	12.0247	19.4995	14.9496	19.4995
609	12.0247	19.8245	14.6246	19.1745
610	12.0247	19.4995	14.6246	19.1745
611	12.0247	19.4995	14.9496	19.1745
612	12.0247	19.4995	14.6246	19.1745
613	12.0247	19.4995	14.9496	19.1745
614	12.3497	19.8245	14.6246	19.4995
615	12.0247	19.4995	14.9496	19.1745
616	12.0247	19.8245	14.6246	19.1745
617	12.0247	19.4995	14.2996	19.1745
618	11.6997	19.4995	14.9496	19.1745
619	12.0247	19.4995	14.2996	19.1745
620	12.0247	19.4995	14.6246	19.1745
621	12.0247	19.8245	14.6246	19.1745
622	12.0247	19.4995	14.9496	18.8495
623	12.0247	19.4995	14.9496	19.1745
624	12.0247	19.8245	14.9496	19.1745
625	12.0247	19.4995	14.2996	19.1745
626	12.0247	19.4995	14.6246	18.8495
627	11.6997	19.4995	14.6246	18.8495
628	12.0247	19.4995	14.9496	18.8495
629	12.0247	19.4995	14.6246	18.8495
630	12.0247	19.4995	14.2996	19.1745
631	11.6997	19.4995	14.6246	19.1745
632	12.0247	19.1745	14.2996	18.8495
633	12.0247	19.8245	14.9496	18.8495
634	11.6997	19.4995	14.6246	19.1745
635	11.6997	19.4995	14.6246	18.8495
636	11.6997	19.8245	14.6246	19.4995
637	12.0247	19.4995	14.9496	19.1745
638	11.6997	19.4995	14.6246	19.1745
639	12.0247	19.4995	14.6246	19.1745
640	12.0247	19.4995	14.6246	19.1745
641	12.0247	19.4995	14.6246	18.8495
642	12.0247	19.4995	14.6246	18.8495
643	12.0247	19.4995	14.6246	19.1745
644	12.0247	19.4995	14.9496	19.4995
645	12.0247	19.8245	14.9496	19.4995
646	12.0247	19.4995	14.6246	19.1745
647	12.3497	19.4995	14.6246	18.8495
648	12.0247	19.8245	14.9496	18.8495
649	12.0247	20.1495	14.6246	19.1745
650	12.0247	19.8245	14.6246	19.1745
651	12.0247	19.4995	14.9496	19.1745
652	12.0247	19.4995	14.9496	18.8495
653	12.3497	19.4995	14.6246	18.8495
654	12.0247	19.4995	14.9496	19.4995
655	12.0247	19.4995	14.9496	19.4995
656	12.0247	19.8245	14.9496	19.1745
657	12.0247	19.4995	14.9496	18.8495
658	12.0247	19.4995	14.9496	19.1745
659	12.0247	19.8245	14.6246	19.1745
660	12.0247	19.4995	14.2996	19.4995
661	12.0247	19.4995	14.6246	18.8495
662	12.0247	19.4995	14.9496	19.4995
663	12.0247	19.4995	14.9496	19.1745
664	12.0247	20.1495	14.6246	19.1745
665	12.0247	19.8245	14.9496	19.1745
666	12.0247	19.8245	14.6246	18.8495
667	12.0247	19.8245	14.6246	18.8495
668	12.3497	19.8245	14.9496	19.1745
669	12.6747	19.4995	14.9496	18.8495
670	12.3497	20.1495	14.6246	19.1745
671	12.3497	19.4995	14.6246	19.4995
672	12.3497	19.4995	14.9496	19.1745
673	12.3497	19.8245	15.2746	18.8495
674	12.3497	19.8245	14.6246	19.1745
675	12.3497	19.4995	14.6246	18.8495
676	12.3497	19.4995	14.6246	18.8495
677	12.3497	20.1495	14.6246	19.1745
678	12.0247	19.4995	14.9496	19.1745
679	12.6747	19.8245	14.6246	19.1745
680	12.3497	19.4995	14.9496	18.8495
681	12.0247	19.4995	14.9496	19.4995
682	12.0247	20.1495	14.9496	18.8495
683	11.6997	19.8245	14.9496	18.8495
684	12.0247	19.4995	14.6246	19.4995
685	12.0247	19.4995	14.9496	18.8495
686	12.0247	20.1495	14.6246	19.1745
687	11.6997	19.4995	14.6246	19.1745
688	12.0247	19.4995	14.9496	19.1745
689	11.6997	19.4995	14.6246	19.1745
690	12.0247	19.8245	14.9496	18.8495
691	12.0247	19.4995	14.6246	18.8495
692	12.3497	19.4995	15.2746	19.1745
693	11.6997	19.4995	14.6246	19.4995
694	11.6997	19.4995	14.6246	18.8495
695	12.0247	19.8245	14.9496	18.8495
696	12.0247	19.4995	14.9496	19.1745
697	12.0247	19.4995	14.9496	18.8495
698	12.0247	19.8245	14.6246	18.8495
699	11.6997	19.8245	14.9496	19.4995
700	11.6997	19.4995	14.6246	19.1745
701	11.6997	19.4995	14.9496	19.1745
702	11.6997	19.4995	14.6246	19.1745
703	11.6997	19.8245	14.9496	19.1745
704	11.6997	19.4995	14.6246	19.1745
705	11.6997	19.8245	14.6246	19.1745
706	11.6997	19.4995	14.6246	19.1745
707	11.6997	19.8245	14.6246	18.8495
708	11.6997	19.8245	14.6246	19.1745
709	11.6997	19.8245	14.6246	19.1745
710	11.6997	19.8245	14.6246	19.1745
711	11.6997	19.8245	14.6246	19.1745
712	11.6997	19.4995	14.9496	18.8495
713	12.3497	19.8245	15.2746	19.1745
714	12.0247	19.4995	14.9496	19.1745
715	11.6997	19.8245	14.6246	18.8495
716	11.6997	19.4995	14.6246	19.1745
717	11.6997	19.8245	14.6246	18.8495
718	11.3747	19.4995	14.9496	19.1745
719	11.3747	19.4995	14.6246	19.4995
720	11.3747	19.4995	14.9496	19.1745
721	11.3747	19.4995	14.6246	19.1745
722	11.3747	19.4995	14.6246	19.1745
723	11.0497	19.8245	14.6246	19.4995
724	11.0497	19.8245	14.6246	18.8495
725	11.3747	19.8245	14.9496	19.1745
726	11.3747	20.1495	14.6246	19.4995
727	11.0497	19.4995	14.6246	19.1745
728	10.7247	19.8245	14.6246	19.1745
729	10.7247	19.8245	14.6246	19.1745
730	11.0497	19.4995	14.6246	19.1745
731	10.7247	19.8245	14.6246	19.1745
732	10.7247	19.8245	14.6246	19.1745
733	10.7247	19.4995	14.6246	19.1745
734	11.0497	19.8245	14.6246	19.1745
735	11.0497	19.8245	14.6246	19.1745
736	11.0497	19.4995	14.9496	19.1745
737	11.0497	19.8245	14.6246	19.1745
738	11.0497	19.8245	14.9496	19.1745
739	11.0497	19.8245	14.9496	19.4995
740	11.0497	19.4995	14.9496	19.1745
741	10.7247	19.8245	14.9496	18.8495
742	11.0497	19.4995	14.6246	19.1745
743	11.0497	19.8245	14.9496	18.8495
744	11.3747	19.8245	14.6246	19.1745
745	11.0497	19.1745	14.9496	19.1745
746	11.0497	19.4995	14.6246	19.1745
747	11.0497	19.4995	14.9496	19.1745
748	11.0497	19.8245	14.6246	19.1745
749	11.3747	19.4995	14.9496	18.8495
750	11.0497	19.8245	14.6246	19.1745
751	11.0497	19.8245	14.6246	19.1745
752	11.0497	19.4995	14.9496	19.4995
753	11.0497	19.1745	14.9496	19.1745
754	10.7247	19.4995	14.9496	19.1745
755	10.7247	19.8245	14.6246	19.4995
756	10.7247	19.8245	14.6246	19.1745
757	11.0497	19.1745	14.9496	19.1745
758	11.0497	19.4995	14.9496	19.1745
759	10.3997	19.4995	14.9496	19.1745
760	11.0497	19.1745	14.9496	19.1745
761	11.0497	19.4995	14.6246	19.1745
762	11.0497	19.8245	14.6246	19.1745
763	10.7247	19.4995	14.6246	19.1745
764	10.7247	19.8245	14.9496	19.1745
765	10.3997	19.8245	14.9496	19.4995
766	11.0497	19.1745	14.6246	19.1745
767	11.0497	19.4995	14.6246	18.8495
768	11.0497	19.4995	14.6246	19.1745
769	11.3747	19.1745	14.6246	19.1745
770	11.3747	19.8245	14.6246	19.1745
771	11.0497	19.8245	14.6246	19.1745
772	11.0497	19.8245	14.6246	19.1745
773	11.3747	19.8245	14.9496	19.1745
774	11.0497	19.8245	14.6246	19.1745
775	11.0497	19.4995	14.6246	19.1745
776	11.0497	19.8245	14.6246	19.1745
777	11.0497	19.4995	14.6246	19.4995
778	11.0497	19.4995	14.9496	19.1745
779	11.3747	19.8245	14.9496	19.1745
780	11.3747	19.8245	14.9496	19.1745
781	11.0497	19.8245	14.6246	19.1745
782	11.3747	19.4995	14.6246	19.1745
783	11.6997	19.8245	14.9496	19.1745
784	11.0497	19.8245	14.9496	19.1745
785	11.6997	19.8245	14.9496	19.1745
786	11.0497	19.8245	14.6246	19.1745
787	11.0497	19.4995	14.6246	19.4995
788	11.0497	19.8245	14.9496	19.4995
789	11.3747	19.8245	14.6246	19.8245
790	11.3747	19.8245	14.2996	19.1745
791	11.3747	19.8245	14.9496	19.1745
792	10.7247	19.4995	14.9496	19.1745
793	11.0497	19.4995	14.9496	19.1745
794	10.7247	19.8245	14.9496	19.4995
795	10.7247	19.8245	14.9496	19.1745
796	11.0497	19.8245	14.9496	19.4995
797	11.3747	19.4995	14.9496	19.1745
798	11.6997	19.8245	14.9496	19.1745
799	11.3747	19.4995	14.2996	19.1745
800	11.6997	19.4995	14.9496	19.1745
801	11.3747	19.4995	14.6246	19.1745
802	11.0497	19.8245	14.6246	19.1745
803	11.3747	19.4995	14.6246	19.1745
804	11.3747	19.8245	14.6246	19.1745
805	11.3747	19.4995	14.6246	19.1745
806	11.0497	19.8245	14.9496	19.1745
807	11.0497	19.8245	14.6246	19.4995
808	11.6997	20.1495	14.9496	19.1745
809	11.3747	19.8245	14.9496	19.1745
810	11.3747	20.1495	14.9496	19.1745
811	11.3747	20.1495	14.9496	19.4995
812	12.0247	20.1495	14.9496	19.1745
813	11.6997	20.1495	14.9496	19.1745
814	11.3747	20.1495	14.9496	19.1745
815	11.3747	20.1495	14.6246	19.4995
816	11.6997	20.1495	14.6246	19.1745
817	11.6997	20.1495	14.9496	19.1745
818	11.0497	20.1495	14.6246	19.4995
819	11.3747	20.1495	14.9496	18.8495
820	11.3747	20.1495	14.9496	19.1745
821	11.6997	20.1495	14.6246	19.4995
822	11.6997	20.1495	14.9496	19.4995
823	11.6997	20.1495	14.9496	19.1745
824	12.0247	20.1495	14.9496	19.1745
825	11.6997	20.1495	14.9496	19.1745
826	11.6997	19.8245	14.9496	19.1745
827	12.0247	20.1495	14.9496	19.1745
828	12.0247	20.1495	14.6246	19.1745
829	12.3497	20.1495	14.9496	19.4995
830	12.3497	20.1495	14.9496	19.1745
831	12.3497	20.1495	14.9496	19.4995
832	12.3497	20.1495	14.9496	19.1745
833	12.3497	20.1495	14.9496	19.4995
834	12.0247	19.8245	14.9496	19.4995
835	12.3497	20.1495	14.9496	18.8495
836	12.3497	20.1495	14.9496	19.4995
837	12.3497	20.1495	14.9496	19.1745
838	12.3497	20.1495	14.6246	19.1745
839	12.3497	20.4745	14.9496	19.4995
840	12.0247	20.1495	14.9496	19.4995
841	12.0247	20.1495	14.9496	19.1745
842	12.3497	20.1495	14.6246	19.1745
843	12.0247	19.8245	14.9496	18.8495
844	12.3497	20.1495	14.6246	19.4995
845	12.0247	20.1495	14.9496	19.4995
846	12.3497	20.1495	14.6246	19.1745
847	12.3497	20.1495	14.6246	19.1745
848	12.3497	20.1495	14.6246	19.1745
849	12.0247	20.1495	14.6246	19.4995
850	12.0247	19.8245	14.9496	19.4995
851	12.0247	20.1495	14.6246	19.4995
852	12.0247	20.4745	14.6246	19.1745
853	12.0247	19.8245	14.6246	19.1745
854	12.3497	19.8245	14.6246	19.1745
855	12.0247	19.8245	15.2746	18.8495
856	12.0247	19.8245	14.9496	19.1745
857	12.3497	20.1495	14.9496	19.1745
858	12.0247	20.1495	14.6246	19.1745
859	12.3497	19.8245	14.6246	19.1745
860	12.0247	20.4745	14.6246	19.1745
861	12.0247	20.1495	15.2746	18.8495
862	12.3497	20.1495	14.6246	19.1745
863	12.0247	19.8245	14.6246	19.1745
864	12.3497	20.1495	14.6246	18.8495
865	12.3497	20.4745	14.6246	19.1745
866	12.0247	19.8245	14.9496	18.8495
867	12.0247	20.4745	14.9496	19.1745
868	12.0247	20.4745	14.9496	19.1745
869	12.3497	19.8245	14.9496	19.1745
870	12.0247	20.1495	14.6246	19.1745
871	12.0247	20.4745	14.6246	18.8495
872	11.6997	20.1495	14.9496	18.8495
873	11.6997	20.1495	14.6246	19.1745
874	12.3497	20.1495	14.6246	19.1745
875	12.6747	20.1495	14.6246	18.8495
876	12.0247	20.4745	14.6246	19.1745
877	11.6997	20.1495	14.6246	19.4995
878	12.3497	20.4745	14.9496	19.4995
879	12.0247	20.1495	14.6246	18.8495
880	12.3497	20.1495	14.6246	19.1745
881	11.6997	19.8245	14.6246	18.8495
882	12.3497	20.1495	14.9496	19.1745
883	12.0247	20.4745	15.2746	19.4995
884	12.3497	20.1495	14.6246	19.1745
885	12.0247	20.1495	14.9496	19.1745
886	12.0247	20.4745	14.9496	18.8495
887	12.0247	20.1495	14.9496	19.1745
888	11.6997	20.1495	14.9496	19.4995
889	12.0247	19.8245	14.6246	19.1745
890	11.3747	19.8245	15.2746	19.1745
891	11.6997	20.1495	14.9496	19.1745
892	11.6997	20.1495	14.9496	19.1745
893	11.6997	20.4745	14.9496	19.1745
894	11.6997	19.8245	14.9496	19.4995
895	12.0247	20.4745	14.9496	19.1745
896	11.6997	20.1495	14.2996	18.8495
897	12.6747	20.1495	14.9496	19.4995
898	12.0247	20.1495	14.9496	19.1745
899	11.6997	20.1495	14.6246	19.4995
900	12.3497	20.4745	14.9496	19.1745
901	11.6997	20.1495	14.9496	18.8495
902	12.0247	20.4745	14.9496	19.1745
903	11.6997	19.8245	14.9496	18.8495
904	11.6997	20.4745	14.9496	19.4995
905	11.6997	20.1495	14.6246	19.4995
906	11.6997	20.1495	15.2746	19.4995
907	12.0247	20.4745	14.9496	19.4995
908	11.3747	20.1495	14.6246	19.1745
909	12.0247	19.8245	14.6246	19.1745
910	12.3497	19.8245	14.9496	19.4995
911	11.6997	20.1495	14.9496	19.1745
912	12.0247	20.1495	14.6246	19.1745
913	11.6997	20.1495	14.9496	19.4995
914	12.0247	20.4745	14.6246	19.1745
915	10.7247	20.4745	14.9496	19.1745
916	12.0247	20.4745	14.6246	19.4995
917	12.3497	20.4745	14.9496	19.1745
918	12.3497	20.1495	14.2996	19.4995
919	11.6997	20.1495	14.9496	19.1745
920	12.3497	20.1495	14.6246	19.1745
921	12.3497	20.4745	14.9496	19.1745
922	12.3497	20.1495	14.9496	19.1745
923	12.0247	20.1495	14.9496	19.4995
924	12.0247	20.4745	14.2996	19.1745
925	12.3497	20.1495	14.9496	19.1745
926	12.6747	20.1495	14.6246	19.4995
927	12.3497	20.1495	14.9496	19.1745
928	12.0247	19.8245	14.9496	19.4995
929	12.3497	19.8245	14.6246	19.4995
930	12.6747	20.1495	14.9496	19.1745
931	12.3497	20.4745	14.6246	19.1745
932	12.3497	20.1495	14.2996	19.1745
933	12.3497	20.4745	14.2996	19.1745
934	12.3497	20.1495	14.9496	19.1745
935	12.6747	20.4745	14.6246	19.4995
936	12.3497	20.1495	14.6246	19.4995
937	12.3497	20.1495	14.6246	19.4995
938	12.6747	20.4745	14.6246	19.1745
939	12.3497	20.1495	14.2996	19.1745
940	12.6747	20.1495	14.6246	19.4995
941	12.3497	20.1495	14.6246	19.4995
942	12.3497	20.4745	14.6246	19.1745
943	12.3497	20.1495	14.6246	19.1745
944	12.6747	20.1495	14.6246	19.4995
945	12.3497	20.1495	14.6246	19.1745
946	12.3497	19.8245	14.6246	19.1745
947	12.3497	20.4745	14.6246	19.1745
948	12.6747	20.1495	14.9496	19.1745
949	12.6747	20.1495	14.6246	19.1745
950	12.6747	20.4745	14.6246	19.1745
951	12.6747	20.1495	14.6246	19.1745
952	12.3497	20.1495	14.6246	19.1745
953	12.3497	20.1495	14.6246	19.1745
954	12.3497	20.1495	14.2996	19.4995
955	12.3497	20.1495	14.6246	19.1745
956	12.3497	20.4745	14.6246	19.4995
957	12.3497	20.4745	14.6246	19.1745
958	12.3497	20.4745	14.6246	19.1745
959	12.3497	20.1495	14.6246	19.1745
960	12.6747	20.1495	14.6246	19.4995
961	12.3497	20.4745	14.6246	19.1745
962	12.3497	20.4745	14.2996	19.1745
963	12.6747	20.4745	14.6246	19.1745
964	12.3497	20.4745	14.6246	19.1745
965	12.3497	20.1495	14.6246	19.4995
966	12.3497	20.1495	14.6246	19.1745
967	12.3497	20.4745	14.6246	19.4995
968	12.6747	20.4745	14.6246	19.1745
969	12.3497	19.8245	14.2996	19.1745
970	12.3497	20.4745	14.6246	19.4995
971	11.3747	20.1495	14.9496	19.1745
972	11.6997	20.1495	14.6246	19.1745
973	11.0497	20.4745	14.9496	19.1745
974	11.3747	20.1495	14.6246	19.4995
975	11.0497	20.4745	14.6246	19.1745
976	11.3747	20.4745	14.6246	19.8245
977	11.0497	20.4745	14.6246	19.1745
978	11.6997	20.1495	14.6246	19.4995
979	11.3747	20.4745	14.6246	19.1745
980	11.6997	20.4745	14.6246	19.4995
981	11.6997	20.4745	14.6246	19.1745
982	11.3747	20.1495	14.6246	19.1745
983	12.3497	19.8245	14.6246	19.1745
984	12.0247	20.1495	14.6246	19.1745
985	12.0247	19.8245	14.9496	19.4995
986	11.6997	20.4745	14.6246	19.1745
987	11.3747	20.1495	14.6246	19.1745
988	11.6997	20.4745	14.6246	19.1745
989	11.3747	20.1495	14.2996	19.1745
990	11.3747	20.1495	14.2996	19.1745
991	11.3747	20.1495	14.2996	19.1745
992	11.6997	20.4745	14.2996	19.4995
993	11.0497	20.4745	14.6246	19.4995
994	11.3747	20.1495	14.6246	19.1745
995	11.3747	20.1495	14.2996	19.1745
996	11.0497	20.4745	14.6246	19.4995
997	11.6997	20.4745	14.2996	19.1745
998	11.6997	20.4745	14.6246	19.4995
999	11.3747	20.4745	14.6246	19.1745
1000	11.3747	20.1495	14.6246	19.4995
1001	11.3747	20.4745	14.2996	19.1745
1002	11.6997	20.1495	14.2996	19.8245
1003	11.6997	20.4745	14.6246	19.1745
1004	11.6997	20.4745	14.2996	19.1745
1005	11.6997	20.4745	14.6246	19.1745
1006	11.6997	20.4745	14.6246	19.1745
1007	11.3747	20.4745	14.6246	19.1745
1008	11.0497	20.4745	14.6246	19.1745
1009	11.0497	20.1495	14.6246	19.4995
1010	11.0497	20.4745	14.2996	19.4995
1011	11.6997	20.4745	14.2996	19.4995
1012	11.6997	20.1495	14.6246	19.1745
1013	11.3747	20.4745	14.2996	19.1745
1014	11.0497	20.7995	14.2996	19.4995
1015	11.0497	20.1495	14.6246	19.1745
1016	11.3747	20.4745	14.6246	19.4995
1017	11.3747	20.1495	14.2996	19.1745
1018	11.3747	20.1495	13.9747	19.4995
1019	11.6997	20.1495	14.6246	19.4995
1020	11.3747	20.1495	14.2996	19.8245
1021	11.6997	20.4745	14.2996	19.4995
1022	11.6997	20.4745	14.6246	19.1745
1023	11.6997	20.7995	14.6246	19.1745
1024	11.0497	20.1495	14.6246	19.4995
1025	11.3747	20.4745	14.6246	19.1745
1026	11.0497	20.4745	14.2996	19.1745
1027	11.3747	20.1495	14.6246	19.1745
1028	11.0497	20.1495	14.9496	19.1745
1029	11.0497	20.4745	14.6246	19.1745
1030	11.0497	20.4745	14.6246	19.4995
1031	11.6997	20.1495	14.6246	19.1745
1032	11.3747	20.1495	14.2996	19.4995
1033	11.3747	20.4745	14.6246	19.1745
1034	11.6997	20.1495	14.9496	19.4995
1035	11.0497	20.4745	14.6246	19.4995
1036	11.3747	20.1495	14.6246	19.4995
1037	11.0497	20.1495	14.6246	19.1745
1038	11.3747	20.4745	14.6246	19.4995
1039	11.3747	20.1495	14.6246	19.1745
1040	11.0497	20.4745	14.6246	19.4995
1041	11.0497	20.4745	14.2996	19.1745
1042	11.0497	20.4745	14.2996	19.4995
1043	11.3747	20.4745	14.6246	19.4995
1044	11.0497	20.4745	14.6246	19.4995
1045	11.0497	20.1495	14.6246	19.1745
1046	11.0497	20.1495	14.6246	19.4995
1047	11.0497	20.4745	14.2996	19.4995
1048	11.0497	20.4745	14.6246	19.1745
1049	11.0497	20.4745	14.6246	19.4995
1050	11.0497	20.1495	14.2996	19.1745
1051	11.0497	20.4745	14.6246	19.4995
1052	11.0497	20.1495	14.2996	19.1745
1053	11.0497	20.4745	14.2996	19.1745
1054	11.0497	20.4745	14.6246	19.4995
1055	11.0497	20.4745	14.6246	19.4995
1056	11.0497	20.1495	14.2996	19.1745
1057	11.0497	20.1495	14.6246	19.4995
1058	11.3747	20.4745	14.6246	19.1745
1059	11.0497	20.1495	14.2996	19.4995
1060	11.0497	20.4745	14.2996	19.4995
1061	11.0497	20.4745	14.2996	19.4995
1062	11.0497	20.4745	14.6246	19.4995
1063	11.0497	20.1495	14.6246	19.4995
1064	11.3747	20.4745	14.2996	19.1745
1065	11.3747	20.1495	14.6246	19.1745
1066	11.3747	20.4745	14.9496	19.4995
1067	11.3747	20.4745	14.2996	19.1745
1068	11.6997	20.1495	14.6246	19.4995
1069	12.3497	20.7995	14.6246	19.4995
1070	11.6997	20.7995	14.6246	19.1745
1071	11.3747	20.4745	14.6246	19.4995
1072	11.3747	20.1495	14.9496	19.4995
1073	11.3747	20.1495	14.6246	19.4995
1074	11.6997	20.4745	14.2996	19.4995
1075	12.0247	20.4745	14.9496	19.4995
1076	12.3497	20.4745	14.9496	19.1745
1077	11.3747	20.1495	14.6246	19.4995
1078	11.3747	20.4745	14.6246	19.1745
1079	11.3747	20.4745	14.2996	19.4995
1080	11.3747	20.4745	14.9496	19.1745
1081	11.6997	20.4745	14.2996	19.4995
1082	11.0497	20.1495	14.6246	19.4995
1083	11.3747	20.4745	14.9496	19.4995
1084	11.3747	20.1495	14.2996	19.4995
1085	11.0497	20.1495	14.6246	19.4995
1086	11.0497	20.4745	14.2996	19.4995
1087	10.7247	20.4745	14.6246	19.4995
1088	11.0497	20.1495	14.6246	19.4995
1089	11.3747	20.1495	14.6246	19.1745
1090	12.0247	20.4745	14.6246	19.1745
1091	12.0247	20.1495	14.2996	19.4995
1092	12.0247	20.4745	14.2996	19.8245
1093	11.3747	20.7995	14.2996	19.1745
1094	11.6997	20.1495	14.6246	19.1745
1095	12.0247	20.1495	14.2996	19.4995
1096	12.0247	20.4745	14.2996	19.4995
1097	12.0247	20.1495	14.6246	19.4995
1098	12.0247	20.1495	14.2996	19.4995
1099	11.3747	20.1495	14.2996	19.1745
1100	11.3747	20.1495	14.2996	19.4995
1101	12.0247	20.1495	14.2996	19.4995
1102	12.0247	20.1495	14.2996	19.4995
1103	11.6997	20.1495	14.2996	19.4995
1104	11.6997	20.1495	14.6246	19.4995
1105	11.3747	20.1495	14.2996	19.4995
1106	11.3747	20.1495	14.2996	19.4995
1107	11.6997	20.4745	14.6246	19.4995
1108	11.6997	20.1495	14.6246	19.4995
1109	11.3747	20.1495	14.6246	19.4995
1110	11.6997	20.1495	14.6246	19.4995
1111	11.6997	20.1495	14.9496	19.1745
1112	11.6997	20.4745	14.2996	19.4995
1113	11.0497	20.1495	14.6246	19.4995
1114	11.0497	20.1495	14.6246	19.4995
1115	12.0247	20.1495	14.2996	19.4995
1116	11.6997	20.4745	14.6246	19.4995
1117	11.6997	20.1495	14.6246	19.4995
1118	11.6997	20.1495	14.2996	19.4995
1119	11.6997	20.4745	14.9496	19.1745
1120	11.6997	20.1495	14.6246	19.4995
1121	11.6997	20.1495	14.6246	19.4995
1122	11.6997	20.4745	14.2996	19.1745
1123	11.6997	20.1495	14.2996	19.4995
1124	11.6997	20.1495	14.6246	19.4995
1125	11.6997	20.4745	14.2996	19.4995
1126	11.6997	20.1495	14.6246	19.4995
1127	11.6997	20.1495	14.6246	19.4995
1128	11.3747	20.4745	14.9496	19.4995
1129	11.3747	20.1495	14.9496	19.4995
1130	12.0247	20.4745	14.6246	19.4995
1131	11.6997	20.1495	14.2996	19.1745
1132	11.3747	20.4745	14.6246	19.4995
1133	11.6997	20.1495	14.2996	19.1745
1134	11.6997	20.1495	14.2996	19.4995
1135	11.6997	20.1495	14.2996	19.4995
1136	11.3747	20.1495	14.2996	19.1745
1137	11.6997	20.1495	14.2996	19.4995
1138	11.3747	20.4745	14.2996	19.1745
1139	11.6997	20.1495	14.6246	19.4995
1140	12.3497	20.4745	14.2996	19.4995
1141	12.0247	20.1495	14.2996	19.4995
1142	12.6747	20.1495	14.6246	19.1745
1143	12.6747	20.1495	14.2996	19.4995
1144	12.6747	20.1495	14.2996	19.4995
1145	12.3497	20.1495	14.2996	19.4995
1146	11.3747	20.1495	14.6246	19.4995
1147	11.6997	20.4745	14.2996	19.4995
1148	11.3747	20.1495	14.2996	19.1745
1149	11.0497	20.1495	14.6246	19.4995
1150	11.0497	20.1495	14.6246	19.4995
1151	11.0497	20.1495	14.9496	19.4995
1152	10.7247	20.1495	14.6246	19.1745
1153	11.3747	20.4745	14.6246	19.1745
1154	10.7247	20.4745	14.6246	19.4995
1155	11.0497	20.1495	14.2996	19.1745
1156	11.6997	20.1495	14.6246	19.1745
1157	10.7247	20.1495	14.6246	19.1745
1158	11.3747	20.4745	14.2996	19.4995
1159	11.3747	20.1495	14.6246	19.1745
1160	11.3747	20.1495	14.6246	19.4995
1161	11.3747	20.1495	14.6246	19.4995
1162	11.0497	20.1495	14.6246	19.1745
1163	11.6997	20.1495	14.2996	19.4995
1164	11.3747	20.1495	14.2996	19.1745
1165	11.0497	20.4745	14.6246	19.4995
1166	11.6997	20.1495	14.6246	19.4995
1167	11.0497	20.1495	14.2996	19.4995
1168	11.0497	20.1495	14.6246	19.4995
1169	11.3747	19.8245	14.2996	19.4995
1170	11.3747	20.4745	14.2996	19.1745
1171	10.3997	20.4745	14.6246	19.1745
1172	10.7247	20.1495	14.2996	19.4995
1173	11.3747	20.1495	14.2996	19.1745
1174	10.7247	20.1495	14.2996	19.1745
1175	11.3747	20.1495	14.2996	19.4995
1176	11.3747	19.8245	14.2996	19.4995
1177	10.7247	20.1495	14.9496	19.1745
1178	11.0497	20.4745	14.2996	19.1745
1179	11.6997	20.1495	13.9747	19.4995
1180	11.6997	20.1495	14.2996	19.4995
1181	11.6997	20.1495	14.6246	19.4995
1182	11.6997	20.1495	14.6246	19.4995
1183	11.6997	20.1495	14.2996	19.1745
1184	11.6997	20.1495	14.2996	19.4995
1185	11.6997	20.1495	14.2996	19.4995
1186	12.0247	20.1495	14.2996	19.1745
1187	11.3747	20.1495	14.2996	19.1745
1188	11.6997	20.1495	14.6246	19.4995
1189	11.6997	20.1495	14.6246	19.4995
1190	11.3747	20.4745	14.6246	19.4995
1191	12.0247	20.1495	14.2996	19.4995
1192	12.0247	20.1495	14.2996	19.4995
1193	12.0247	20.1495	14.6246	19.4995
1194	11.6997	20.1495	14.2996	19.4995
1195	12.0247	20.4745	14.2996	19.1745
1196	12.0247	20.1495	14.6246	19.4995
1197	11.6997	20.4745	14.2996	19.4995
1198	11.6997	20.1495	14.6246	19.4995
1199	11.6997	20.1495	14.6246	19.4995
1200	11.3747	20.4745	14.6246	19.4995
1201	11.6997	20.1495	14.6246	19.4995
1202	12.0247	20.1495	14.2996	19.4995
1203	11.6997	20.4745	14.2996	19.1745
1204	11.6997	20.1495	14.2996	19.1745
1205	11.6997	19.8245	14.2996	19.4995
1206	11.6997	20.4745	14.2996	19.1745
1207	11.6997	20.1495	14.6246	19.4995
1208	11.3747	20.1495	14.6246	19.4995
1209	11.3747	20.1495	14.6246	19.4995
1210	11.3747	20.4745	14.2996	19.4995
1211	11.6997	20.1495	14.2996	19.4995
1212	11.6997	20.4745	14.2996	19.4995
1213	12.0247	20.1495	14.2996	19.4995
1214	11.6997	20.4745	14.2996	19.8245
1215	11.3747	20.4745	14.2996	19.4995
1216	11.3747	20.4745	14.2996	19.4995
1217	11.6997	20.4745	14.6246	19.4995
1218	11.6997	20.4745	14.2996	19.4995
1219	11.6997	20.4745	14.2996	19.4995
1220	11.3747	20.4745	14.2996	19.4995
1221	11.6997	20.4745	14.2996	19.1745
1222	11.3747	20.4745	14.2996	19.1745
1223	12.0247	20.4745	14.2996	19.4995
1224	11.6997	20.4745	14.2996	19.1745
1225	11.6997	20.1495	14.2996	19.4995
1226	11.6997	20.4745	13.9747	19.4995
1227	11.6997	20.4745	14.2996	19.4995
1228	11.6997	20.4745	14.2996	19.4995
1229	11.6997	20.4745	14.2996	19.4995
1230	11.6997	20.4745	13.9747	19.1745
1231	12.0247	20.4745	14.6246	19.4995
1232	12.3497	20.1495	14.2996	19.1745
1233	11.6997	20.4745	14.6246	19.4995
1234	12.3497	20.1495	14.6246	19.4995
1235	12.3497	20.4745	14.2996	19.1745
1236	11.6997	20.4745	14.2996	18.8495
1237	12.0247	20.4745	14.6246	19.1745
1238	11.6997	20.4745	14.2996	19.4995
1239	11.6997	20.4745	14.2996	19.4995
1240	11.6997	20.4745	14.2996	19.4995
1241	11.6997	20.4745	13.9747	19.1745
1242	11.3747	20.4745	13.9747	19.4995
1243	11.0497	20.4745	13.9747	19.1745
1244	11.3747	20.4745	14.6246	19.1745
1245	11.3747	20.4745	14.2996	19.1745
1246	11.0497	20.4745	14.2996	19.4995
1247	11.3747	20.4745	14.6246	19.4995
1248	11.6997	20.1495	14.6246	19.4995
1249	11.3747	20.1495	14.2996	19.4995
1250	11.0497	20.4745	14.6246	19.4995
1251	11.0497	20.4745	14.6246	19.4995
1252	11.3747	20.4745	13.9747	19.4995
1253	11.6997	20.4745	14.2996	19.4995
1254	11.6997	20.4745	14.2996	19.1745
1255	11.6997	20.4745	14.2996	19.4995
1256	11.3747	20.4745	14.6246	19.1745
1257	11.3747	20.4745	14.6246	19.4995
1258	11.3747	20.4745	14.2996	19.1745
1259	11.6997	20.4745	14.6246	19.4995
1260	11.0497	20.4745	14.6246	18.8495
1261	11.6997	20.1495	14.6246	19.4995
1262	11.0497	20.4745	14.2996	19.4995
1263	11.3747	20.4745	14.6246	19.4995
1264	11.0497	20.1495	14.2996	19.1745
1265	11.3747	20.4745	14.2996	19.1745
1266	11.3747	20.1495	13.9747	19.1745
1267	11.6997	20.1495	14.2996	19.4995
1268	11.3747	20.1495	14.6246	19.4995
1269	11.3747	20.1495	13.9747	19.4995
1270	11.3747	20.4745	14.2996	19.1745
1271	11.3747	20.4745	14.2996	19.4995
1272	11.3747	20.4745	14.2996	19.1745
1273	11.6997	20.1495	14.6246	19.1745
1274	11.3747	20.4745	14.2996	19.1745
1275	11.3747	20.1495	14.6246	19.1745
1276	11.3747	20.4745	14.6246	19.1745
1277	11.3747	20.4745	14.2996	19.4995
1278	11.3747	20.1495	14.6246	19.1745
1279	11.3747	20.4745	14.6246	19.1745
1280	11.0497	20.4745	14.6246	19.4995
1281	11.0497	20.1495	14.2996	19.4995
1282	11.3747	20.4745	14.6246	19.1745
1283	11.3747	20.4745	14.6246	19.4995
1284	11.0497	20.4745	14.6246	19.1745
1285	11.6997	20.4745	14.6246	19.1745
1286	11.6997	20.4745	14.2996	19.1745
1287	11.6997	20.4745	13.9747	19.4995
1288	11.3747	20.4745	14.2996	19.1745
1289	11.6997	20.4745	14.9496	19.4995
1290	11.6997	20.4745	14.2996	19.1745
1291	11.6997	20.1495	13.9747	19.1745
1292	11.3747	20.4745	14.2996	19.4995
1293	11.3747	20.1495	14.2996	19.1745
1294	11.3747	20.4745	14.2996	19.4995
1295	11.3747	20.4745	14.2996	19.1745
1296	11.3747	20.4745	14.2996	19.4995
1297	11.6997	20.4745	14.2996	19.4995
1298	11.6997	20.4745	14.2996	19.4995
1299	11.6997	20.4745	14.2996	19.1745
1300	11.6997	20.4745	14.6246	19.1745
1301	11.6997	20.4745	14.2996	19.4995
1302	11.3747	20.4745	14.2996	19.4995
1303	11.3747	20.4745	14.2996	19.4995
1304	11.6997	20.4745	14.2996	18.8495
1305	11.6997	20.4745	14.2996	19.4995
1306	11.3747	20.4745	14.2996	19.4995
1307	11.6997	20.4745	14.2996	19.4995
1308	11.6997	20.1495	14.2996	19.1745
1309	11.3747	20.1495	14.6246	19.4995
1310	11.6997	20.4745	13.9747	19.4995
1311	11.3747	20.4745	14.2996	19.4995
1312	11.6997	20.4745	14.2996	19.1745
1313	11.6997	20.4745	13.9747	19.4995
1314	11.6997	20.4745	14.6246	19.4995
1315	11.6997	20.4745	13.9747	19.1745
1316	12.0247	20.4745	13.9747	19.4995
1317	11.6997	20.4745	14.2996	19.4995
1318	11.6997	20.4745	14.2996	19.4995
1319	12.0247	20.4745	14.6246	19.1745
1320	12.0247	20.4745	13.9747	19.4995
1321	12.0247	20.4745	13.9747	19.4995
1322	12.3497	20.4745	14.2996	19.4995
1323	11.6997	20.4745	14.2996	19.4995
1324	11.6997	20.4745	14.2996	19.4995
1325	12.0247	20.4745	14.6246	19.4995
1326	11.6997	20.4745	13.9747	19.4995
1327	11.6997	20.1495	14.6246	19.4995
1328	12.0247	20.4745	14.6246	19.4995
1329	12.0247	20.1495	14.6246	19.4995
1330	12.0247	20.4745	14.6246	19.4995
1331	11.6997	20.1495	14.6246	19.4995
1332	11.6997	20.4745	14.6246	19.4995
1333	11.3747	20.4745	14.2996	19.4995
1334	11.3747	20.4745	14.2996	19.4995
1335	11.3747	20.1495	14.2996	19.1745
1336	11.3747	20.1495	14.2996	19.1745
1337	11.6997	20.4745	14.6246	19.4995
1338	11.6997	20.4745	13.9747	19.4995
1339	11.3747	20.4745	14.6246	19.4995
1340	11.6997	20.4745	14.6246	19.4995
1341	12.0247	20.4745	13.9747	19.4995
1342	11.6997	20.4745	14.2996	19.4995
1343	11.6997	20.1495	14.2996	19.4995
1344	11.6997	20.4745	13.9747	19.1745
1345	11.3747	20.4745	14.2996	19.1745
1346	11.3747	20.1495	14.2996	19.4995
1347	11.3747	20.4745	14.2996	19.4995
1348	11.3747	20.4745	14.2996	19.1745
1349	11.3747	20.1495	13.9747	19.4995
1350	11.3747	20.4745	14.2996	19.1745
1351	11.3747	20.4745	14.2996	19.1745
1352	11.3747	20.4745	14.2996	19.1745
1353	11.3747	20.1495	13.9747	19.4995
1354	11.3747	20.1495	14.2996	19.4995
1355	11.3747	20.4745	13.9747	19.4995
1356	11.3747	20.4745	13.9747	19.4995
1357	11.3747	19.8245	14.2996	19.4995
1358	11.3747	20.1495	14.6246	19.1745
1359	11.6997	20.1495	13.9747	19.1745
1360	11.6997	20.1495	13.9747	19.4995
1361	11.6997	20.4745	13.9747	19.4995
1362	11.6997	20.4745	14.2996	19.1745
1363	11.6997	20.4745	14.2996	19.1745
1364	12.0247	20.1495	14.6246	19.4995
1365	12.0247	20.1495	14.6246	19.4995
1366	11.6997	20.4745	14.6246	19.4995
1367	12.0247	20.4745	14.6246	19.4995
1368	11.6997	20.4745	14.2996	19.4995
1369	11.6997	20.4745	14.2996	19.1745
1370	11.6997	20.4745	14.6246	19.4995
1371	11.6997	20.4745	14.2996	19.1745
1372	12.0247	20.7995	14.6246	19.4995
1373	12.3497	20.4745	14.2996	19.4995
1374	11.6997	20.1495	14.2996	19.4995
1375	12.0247	20.1495	14.6246	19.1745
1376	12.0247	20.1495	14.2996	19.4995
1377	12.0247	20.4745	14.2996	19.1745
1378	11.6997	20.1495	14.2996	19.4995
1379	11.6997	20.1495	14.6246	19.1745
1380	11.6997	20.1495	14.2996	19.4995
1381	12.0247	20.4745	14.2996	19.1745
1382	11.6997	20.4745	14.2996	19.1745
1383	11.6997	20.4745	14.6246	19.4995
1384	12.0247	20.4745	13.9747	19.1745
1385	11.6997	20.1495	14.2996	19.4995
1386	11.6997	20.1495	13.9747	19.4995
1387	12.0247	20.4745	14.2996	19.4995
1388	11.6997	20.4745	14.2996	19.4995
1389	11.6997	20.4745	14.6246	19.4995
1390	11.6997	20.1495	14.6246	19.4995
1391	12.0247	20.4745	14.6246	19.4995
1392	11.6997	20.1495	14.6246	19.4995
1393	11.3747	20.1495	14.2996	19.1745
1394	11.6997	20.1495	13.9747	19.4995
1395	11.3747	20.4745	13.9747	19.1745
1396	11.3747	20.4745	13.9747	19.1745
1397	11.3747	20.1495	14.2996	19.4995
1398	11.6997	20.4745	14.6246	19.1745
1399	11.3747	20.4745	13.9747	19.4995
1400	11.3747	20.4745	14.2996	19.4995
1401	11.0497	20.1495	13.9747	19.4995
1402	11.3747	20.4745	14.2996	19.4995
1403	11.3747	20.1495	14.2996	19.4995
1404	11.6997	20.1495	13.9747	19.4995
1405	11.6997	20.4745	14.6246	19.4995
1406	11.6997	20.4745	13.9747	19.4995
1407	11.6997	20.4745	14.2996	19.4995
1408	11.6997	20.4745	14.2996	19.4995
1409	11.6997	20.1495	13.9747	19.4995
1410	11.6997	20.1495	14.2996	19.1745
1411	11.3747	20.4745	14.2996	19.4995
1412	11.6997	20.4745	14.2996	19.4995
1413	11.6997	20.1495	14.6246	19.4995
1414	11.3747	20.4745	14.2996	19.4995
1415	11.6997	20.1495	14.2996	19.4995
1416	11.6997	20.1495	14.2996	19.4995
1417	11.6997	20.4745	14.2996	19.4995
1418	11.6997	20.4745	14.6246	19.4995
1419	11.6997	20.4745	14.2996	19.4995
1420	11.6997	20.4745	13.9747	19.4995
1421	11.6997	20.4745	14.2996	19.4995
1422	11.3747	20.4745	14.2996	19.4995
1423	11.3747	20.1495	13.9747	19.4995
1424	11.6997	20.4745	14.6246	19.4995
1425	11.6997	20.1495	14.2996	19.4995
1426	11.3747	20.1495	14.2996	19.4995
1427	11.3747	20.4745	14.2996	19.4995
1428	11.0497	20.1495	13.9747	19.1745
1429	11.3747	20.1495	14.6246	18.8495
1430	11.0497	20.1495	14.2996	19.4995
1431	11.3747	20.4745	14.2996	19.1745
1432	11.0497	20.1495	14.6246	19.4995
1433	11.3747	20.1495	14.2996	19.4995
1434	11.0497	20.7995	13.9747	19.4995
1435	11.3747	20.1495	14.6246	19.4995
1436	11.3747	20.4745	14.2996	19.1745
1437	11.3747	20.1495	14.2996	19.4995
1438	11.3747	20.1495	13.9747	19.4995
1439	11.3747	20.7995	13.9747	19.4995
1440	11.3747	20.4745	14.2996	19.1745
1441	11.3747	20.4745	14.6246	19.4995
1442	11.6997	20.1495	14.6246	19.1745
1443	11.3747	20.4745	13.9747	19.4995
1444	11.3747	20.4745	14.2996	19.4995
1445	11.0497	20.1495	14.2996	19.4995
1446	11.3747	20.4745	14.2996	19.4995
1447	11.3747	20.4745	14.2996	19.4995
1448	11.3747	20.4745	14.2996	19.4995
1449	11.3747	20.4745	14.2996	19.4995
1450	11.3747	20.1495	14.6246	19.4995
1451	11.3747	20.4745	14.6246	19.4995
1452	11.3747	20.4745	14.2996	19.4995
1453	11.3747	20.1495	14.2996	19.4995
1454	11.3747	20.1495	14.2996	19.4995
1455	11.3747	20.4745	14.2996	19.4995
1456	11.3747	20.4745	14.2996	19.4995
1457	11.0497	20.1495	14.2996	19.4995
1458	11.0497	20.4745	14.2996	19.4995
1459	11.0497	20.4745	14.2996	19.1745
1460	11.3747	20.4745	14.2996	19.4995
1461	11.3747	20.4745	14.2996	19.4995
1462	11.3747	20.1495	14.2996	19.4995
1463	11.3747	20.1495	14.2996	19.4995
1464	11.3747	20.4745	14.6246	19.4995
1465	11.3747	20.1495	14.6246	19.4995
1466	11.0497	20.4745	14.6246	19.1745
1467	11.3747	20.4745	14.6246	19.4995
1468	11.3747	20.4745	14.6246	19.4995
1469	11.6997	20.1495	14.6246	19.4995
1470	11.6997	20.4745	14.2996	19.1745
1471	11.6997	20.4745	14.2996	19.1745
1472	11.3747	20.4745	14.6246	19.1745
1473	11.0497	20.4745	13.9747	19.8245
1474	11.3747	20.4745	14.2996	19.1745
1475	11.6997	20.1495	14.6246	19.1745
1476	11.3747	20.4745	14.2996	19.4995
1477	11.6997	20.1495	14.2996	19.1745
1478	11.3747	20.4745	14.2996	19.4995
1479	11.3747	20.1495	14.6246	19.4995
1480	11.3747	20.1495	13.9747	19.8245
1481	11.0497	20.1495	13.9747	19.4995
1482	11.3747	20.1495	14.6246	19.1745
1483	11.0497	20.1495	14.6246	19.1745
1484	11.0497	20.4745	14.2996	19.4995
1485	11.6997	20.4745	14.2996	19.1745
1486	11.6997	20.1495	14.6246	19.4995
1487	11.3747	20.1495	14.2996	19.4995
1488	11.0497	20.1495	14.6246	19.4995
1489	11.3747	20.4745	14.2996	19.1745
1490	11.6997	20.4745	13.9747	19.4995
1491	11.6997	20.1495	14.6246	19.4995
1492	11.6997	20.4745	14.2996	19.8245
1493	11.6997	20.1495	14.2996	19.4995
1494	11.6997	20.1495	14.2996	19.4995
1495	11.6997	20.4745	14.2996	19.4995
1496	11.6997	20.1495	14.2996	19.4995
1497	11.6997	20.4745	14.6246	19.4995
1498	11.6997	20.1495	14.2996	19.4995
1499	11.6997	20.1495	14.6246	19.4995
1500	11.6997	20.4745	13.9747	19.4995
1501	11.6997	20.4745	14.2996	19.4995
1502	11.3747	20.4745	13.9747	19.4995
1503	11.3747	20.1495	14.6246	19.4995
1504	11.3747	20.4745	13.9747	19.8245
1505	11.6997	20.1495	13.9747	19.1745
1506	11.6997	20.1495	14.2996	19.1745
1507	11.3747	20.4745	13.9747	19.4995
1508	11.3747	19.8245	13.9747	19.4995
1509	11.6997	20.4745	14.2996	19.8245
1510	11.6997	20.4745	13.6497	19.1745
1511	11.6997	20.1495	14.2996	19.4995
1512	11.6997	20.4745	14.2996	19.1745
1513	11.6997	20.4745	13.9747	19.4995
1514	11.6997	20.1495	14.2996	19.4995
1515	11.6997	20.4745	14.6246	19.1745
1516	11.3747	20.1495	14.6246	19.4995
1517	12.0247	20.4745	14.2996	19.1745
1518	11.6997	20.4745	14.2996	19.1745
1519	11.6997	20.4745	14.2996	19.4995
1520	11.6997	20.4745	14.6246	19.4995
1521	12.0247	20.1495	14.2996	19.4995
1522	11.6997	20.1495	14.6246	19.4995
1523	11.6997	20.4745	14.2996	19.4995
1524	11.6997	20.1495	14.6246	19.1745
1525	12.0247	20.1495	14.2996	19.8245
1526	12.3497	20.1495	14.2996	19.4995
1527	11.6997	20.4745	14.6246	19.1745
1528	11.6997	20.7995	14.2996	19.1745
1529	11.6997	20.4745	14.2996	19.4995
1530	11.6997	20.4745	14.2996	19.8245
1531	11.6997	20.4745	13.9747	19.1745
1532	11.6997	20.1495	14.2996	19.1745
1533	12.0247	20.1495	13.9747	19.1745
1534	12.0247	20.4745	14.6246	19.1745
1535	11.6997	20.4745	13.9747	19.1745
1536	11.6997	20.4745	13.9747	19.1745
1537	12.0247	20.4745	14.2996	19.4995
1538	12.3497	20.4745	13.9747	19.4995
1539	12.0247	20.4745	13.9747	19.8245
1540	12.0247	20.1495	14.2996	19.1745
1541	12.3497	20.1495	13.9747	19.4995
1542	12.6747	20.1495	13.9747	19.1745
1543	11.6997	20.1495	14.2996	19.8245
1544	12.0247	20.1495	14.2996	19.8245
1545	12.3497	20.1495	14.2996	19.4995
1546	12.3497	20.1495	14.2996	19.4995
1547	12.6747	20.1495	14.2996	19.4995
1548	12.3497	20.4745	14.2996	19.4995
1549	12.9997	20.4745	13.9747	19.1745
1550	12.6747	20.1495	13.9747	19.4995
1551	12.6747	20.4745	14.2996	19.1745
1552	12.6747	20.4745	14.2996	19.4995
1553	12.6747	20.4745	14.2996	19.1745
1554	12.6747	20.1495	14.2996	19.4995
1555	12.6747	20.1495	13.9747	19.1745
1556	12.3497	20.1495	14.2996	19.4995
1557	12.3497	20.1495	14.2996	19.4995
1558	12.6747	20.1495	14.6246	19.4995
1559	12.0247	20.1495	14.2996	19.1745
1560	12.0247	20.1495	14.2996	19.4995
1561	12.0247	20.4745	14.2996	19.4995
1562	12.3497	20.1495	14.2996	19.4995
1563	12.6747	20.1495	14.6246	19.4995
1564	12.0247	20.1495	13.9747	19.8245
1565	12.0247	20.1495	14.2996	19.4995
1566	12.0247	20.4745	14.6246	19.8245
1567	12.0247	20.1495	14.2996	19.1745
1568	11.6997	20.1495	14.2996	19.4995
1569	12.3497	20.4745	14.6246	19.8245
1570	12.0247	20.4745	14.2996	19.8245
1571	12.3497	20.4745	14.2996	19.4995
1572	12.3497	20.4745	13.9747	19.4995
1573	12.3497	20.1495	14.2996	19.8245
1574	12.3497	20.4745	14.2996	19.1745
1575	12.6747	20.4745	14.2996	19.4995
1576	11.6997	20.4745	13.9747	19.1745
1577	11.6997	20.4745	14.2996	19.1745
1578	11.6997	20.4745	14.2996	19.4995
1579	11.6997	20.4745	13.9747	19.1745
1580	11.3747	20.1495	13.9747	19.4995
1581	11.6997	20.4745	13.9747	19.1745
1582	11.6997	20.4745	13.9747	19.1745
1583	11.6997	20.1495	14.2996	19.4995
1584	11.3747	20.4745	13.9747	19.4995
1585	11.6997	20.4745	13.9747	19.1745
1586	11.6997	20.4745	13.9747	19.8245
1587	12.0247	20.4745	14.2996	19.1745
1588	11.6997	20.4745	14.2996	19.1745
1589	11.3747	20.4745	14.2996	19.4995
1590	11.6997	20.4745	14.6246	19.4995
1591	11.6997	20.4745	14.6246	19.4995
1592	11.6997	20.1495	14.6246	19.4995
1593	12.0247	20.4745	14.6246	19.4995
1594	11.6997	20.4745	13.9747	19.4995
1595	11.6997	20.4745	13.9747	19.4995
1596	11.3747	20.4745	14.2996	19.1745
1597	11.6997	20.4745	14.2996	19.1745
1598	11.6997	20.4745	13.9747	19.4995
1599	11.6997	20.4745	13.9747	19.4995
1600	11.6997	20.7995	14.2996	19.1745
1601	11.6997	20.4745	13.9747	19.1745
1602	12.3497	20.1495	13.9747	19.4995
1603	11.0497	20.4745	13.9747	19.1745
1604	11.6997	20.1495	14.6246	19.4995
1605	11.6997	20.1495	14.2996	19.8245
1606	11.3747	20.4745	13.9747	19.4995
1607	11.3747	20.1495	14.2996	19.4995
1608	11.0497	20.4745	14.2996	19.4995
1609	11.6997	20.1495	13.9747	19.4995
1610	11.3747	20.4745	13.9747	19.1745
1611	11.3747	20.4745	13.9747	19.4995
1612	11.3747	20.4745	14.2996	19.4995
1613	11.6997	20.4745	13.6497	19.4995
1614	11.0497	20.1495	13.9747	19.1745
1615	11.3747	20.4745	13.9747	19.4995
1616	11.0497	20.4745	13.9747	19.1745
1617	10.7247	20.1495	13.9747	19.1745
1618	11.0497	20.4745	14.6246	19.1745
1619	11.3747	20.1495	14.2996	19.8245
1620	11.6997	20.4745	14.6246	19.4995
1621	11.0497	20.4745	13.9747	19.8245
1622	11.0497	20.1495	13.9747	19.1745
1623	11.0497	20.4745	14.2996	19.1745
1624	11.0497	20.4745	14.2996	19.8245
1625	11.3747	20.4745	14.2996	19.1745
1626	11.3747	20.1495	13.9747	19.4995
1627	11.3747	20.4745	14.2996	19.8245
1628	11.6997	20.4745	13.9747	19.1745
1629	11.0497	20.4745	13.9747	19.1745
1630	11.0497	20.4745	13.3247	19.1745
1631	11.0497	20.4745	13.9747	19.4995
1632	11.0497	20.4745	13.9747	19.1745
1633	11.0497	20.1495	13.6497	19.1745
1634	11.0497	20.1495	14.2996	19.1745
1635	11.0497	20.7995	14.2996	19.4995
1636	11.3747	20.1495	14.2996	19.1745
1637	10.7247	20.4745	13.9747	19.4995
1638	11.6997	20.1495	14.2996	19.4995
1639	11.0497	20.1495	13.9747	19.1745
1640	10.7247	20.1495	13.9747	19.4995
1641	11.3747	20.4745	14.2996	19.8245
1642	11.3747	20.4745	14.2996	19.1745
1643	11.0497	20.4745	13.9747	19.1745
1644	11.3747	20.4745	13.9747	19.4995
1645	11.3747	19.8245	14.2996	19.4995
1646	11.3747	20.1495	14.2996	19.1745
1647	11.3747	20.1495	14.2996	19.1745
1648	11.3747	20.1495	13.9747	19.1745
1649	11.0497	20.4745	14.2996	19.8245
1650	11.0497	20.4745	13.9747	19.4995
1651	11.0497	20.1495	13.9747	19.1745
1652	11.6997	20.1495	13.9747	19.1745
1653	11.6997	20.1495	13.9747	19.1745
1654	11.0497	20.1495	13.9747	19.4995
1655	11.0497	20.1495	13.6497	19.4995
1656	11.0497	20.4745	13.9747	19.4995
1657	11.0497	20.1495	13.9747	19.4995
1658	11.3747	20.4745	13.9747	19.1745
1659	11.3747	20.1495	14.2996	19.1745
1660	11.3747	20.4745	14.6246	19.4995
1661	11.0497	20.1495	14.2996	19.1745
1662	11.3747	20.4745	13.9747	19.1745
1663	11.0497	20.1495	14.2996	19.1745
1664	11.3747	20.4745	13.9747	19.4995
1665	11.3747	20.1495	14.2996	19.1745
1666	11.0497	20.1495	14.2996	19.4995
1667	11.0497	20.4745	13.9747	19.1745
1668	11.3747	20.1495	14.2996	19.1745
1669	11.0497	20.4745	14.2996	19.4995
1670	11.3747	20.1495	14.2996	19.1745
1671	11.0497	20.1495	13.9747	19.1745
1672	11.3747	20.1495	13.9747	19.1745
1673	11.3747	20.1495	13.9747	19.1745
1674	11.3747	20.1495	14.2996	19.1745
1675	11.3747	20.4745	13.9747	19.1745
1676	11.0497	20.4745	14.2996	19.1745
1677	11.0497	20.1495	14.2996	19.1745
1678	11.0497	20.1495	14.2996	19.4995
1679	11.3747	20.1495	13.9747	19.1745
1680	11.0497	20.1495	14.2996	19.1745
1681	11.3747	20.1495	14.2996	19.4995
1682	11.0497	20.1495	14.2996	19.1745
1683	11.0497	19.8245	13.9747	19.1745
1684	11.0497	20.4745	14.2996	19.1745
1685	11.6997	20.4745	14.2996	19.1745
1686	11.6997	20.4745	13.9747	19.1745
1687	11.6997	19.8245	14.2996	19.1745
1688	11.3747	20.4745	13.9747	19.1745
1689	11.6997	20.1495	14.2996	19.4995
1690	11.3747	20.4745	13.9747	19.1745
1691	11.3747	20.4745	14.2996	19.1745
1692	11.3747	20.1495	14.2996	19.4995
1693	11.0497	20.4745	13.9747	19.4995
1694	11.6997	20.4745	13.9747	19.4995
1695	11.6997	20.1495	14.2996	19.1745
1696	11.3747	20.1495	14.2996	19.4995
1697	11.0497	20.4745	14.2996	19.1745
1698	10.7247	20.4745	14.2996	19.1745
1699	11.0497	20.1495	13.9747	19.1745
1700	10.7247	20.4745	13.9747	19.4995
1701	10.7247	20.1495	13.9747	19.1745
1702	11.0497	20.1495	13.9747	19.4995
1703	11.0497	20.4745	13.6497	19.1745
1704	11.3747	20.1495	14.2996	19.4995
1705	11.3747	20.4745	14.2996	19.8245
1706	11.3747	20.4745	14.2996	19.8245
1707	10.7247	20.4745	14.2996	19.8245
1708	11.0497	20.1495	14.2996	19.4995
1709	11.0497	20.1495	14.2996	19.1745
1710	11.0497	20.4745	13.9747	19.4995
1711	11.0497	20.1495	13.9747	19.1745
1712	11.3747	20.1495	14.2996	19.1745
1713	11.3747	20.1495	14.2996	19.1745
1714	11.0497	20.1495	14.2996	19.1745
1715	11.3747	20.4745	13.9747	19.8245
1716	11.3747	20.1495	13.9747	19.1745
1717	11.3747	20.4745	13.6497	19.4995
1718	11.3747	20.4745	13.9747	19.1745
1719	11.0497	20.4745	13.6497	19.1745
1720	11.0497	20.4745	13.9747	19.1745
1721	11.0497	20.4745	14.2996	19.1745
1722	11.3747	20.4745	13.9747	19.4995
1723	11.0497	20.4745	13.9747	19.1745
1724	10.7247	20.1495	13.9747	19.4995
1725	11.0497	20.1495	14.2996	19.1745
1726	11.0497	20.4745	14.6246	19.1745
1727	11.0497	20.1495	13.9747	19.1745
1728	11.3747	20.4745	14.2996	19.1745
1729	10.7247	20.4745	13.9747	19.1745
1730	11.0497	20.4745	13.9747	19.1745
1731	11.0497	20.4745	14.2996	19.1745
1732	11.0497	20.4745	13.9747	19.4995
1733	11.0497	20.1495	13.9747	19.4995
1734	11.0497	20.4745	13.9747	19.4995
1735	11.0497	20.4745	13.9747	19.4995
1736	11.3747	20.4745	13.9747	19.1745
1737	11.0497	20.4745	14.2996	19.4995
1738	11.0497	19.8245	14.6246	19.1745
1739	11.3747	20.4745	14.2996	19.1745
1740	11.3747	20.1495	14.2996	19.4995
1741	11.3747	20.4745	13.6497	19.4995
1742	11.0497	20.1495	14.2996	19.1745
1743	11.3747	20.4745	14.2996	19.4995
1744	11.3747	20.4745	14.6246	19.1745
1745	11.3747	20.4745	13.9747	19.1745
1746	11.0497	20.4745	13.9747	19.1745
1747	11.0497	20.4745	14.6246	19.1745
1748	11.0497	20.4745	13.9747	19.1745
1749	11.3747	20.1495	13.9747	19.1745
1750	11.3747	19.8245	14.2996	19.4995
1751	11.3747	19.8245	14.6246	19.1745
1752	11.0497	19.8245	14.2996	19.1745
1753	11.6997	20.4745	14.2996	19.1745
1754	11.6997	20.1495	14.2996	19.1745
1755	11.6997	20.1495	13.9747	19.4995
1756	11.6997	20.1495	14.2996	19.4995
1757	11.3747	19.8245	14.2996	19.1745
1758	11.3747	20.4745	13.9747	19.4995
1759	11.0497	20.4745	14.2996	19.1745
1760	11.3747	19.8245	14.6246	18.8495
1761	11.3747	20.1495	14.2996	19.1745
1762	11.0497	20.1495	14.6246	19.1745
1763	11.0497	20.1495	14.2996	19.1745
1764	11.0497	20.1495	13.9747	19.4995
1765	11.0497	20.1495	14.2996	19.1745
1766	11.0497	20.4745	14.2996	19.1745
1767	11.0497	20.1495	13.9747	19.1745
1768	11.0497	20.1495	13.9747	19.4995
1769	11.0497	19.8245	13.9747	19.4995
1770	11.0497	20.4745	13.9747	19.4995
1771	11.0497	20.1495	13.9747	19.4995
1772	11.0497	20.1495	13.9747	19.4995
1773	11.3747	20.1495	14.2996	19.1745
1774	11.0497	19.8245	14.6246	18.8495
1775	11.0497	20.1495	14.2996	19.4995
1776	10.7247	19.8245	14.2996	19.1745
1777	11.3747	19.8245	13.9747	19.1745
1778	11.0497	20.1495	14.2996	19.1745
1779	11.0497	20.1495	14.2996	19.1745
1780	11.3747	19.8245	14.2996	19.1745
1781	11.0497	19.8245	14.2996	19.1745
1782	11.0497	20.4745	14.2996	19.4995
1783	11.0497	19.8245	14.2996	19.4995
1784	11.3747	19.8245	13.9747	19.4995
1785	11.3747	19.8245	13.9747	19.1745
1786	11.3747	20.1495	14.2996	19.1745
1787	11.3747	20.1495	13.9747	19.1745
1788	11.6997	19.8245	14.6246	19.1745
1789	11.6997	19.8245	14.2996	19.4995
1790	11.6997	20.1495	14.2996	19.4995
1791	11.3747	19.8245	14.2996	19.1745
1792	11.3747	20.1495	14.6246	19.4995
1793	11.3747	20.1495	13.9747	19.1745
1794	11.3747	19.8245	14.2996	19.4995
1795	11.3747	19.8245	14.6246	19.4995
1796	11.6997	19.8245	13.9747	19.4995
1797	11.6997	19.8245	14.6246	19.1745
1798	11.6997	19.8245	14.6246	19.4995
1799	11.3747	19.8245	14.2996	19.4995

## Sheet: 2Hz
Stimulation
Time (s)	BGBV-198	BGBV-203	BGBV-208	BGBV-212	BGBV-213	BGBV-358	BGBV-359	BGBV-360	BGBV-363	BGBV-364
0	17.5496	12.0247	14.2996	10.7247	11.6997	11.6997	13.3247	14.9496	20.1495	14.6246
1	17.2246	12.0247	13.9747	10.7247	12.0247	11.3747	13.3247	14.9496	20.4745	14.6246
2	17.2246	11.6997	13.6497	10.7247	11.6997	11.6997	12.9997	15.2746	20.4745	14.9496
3	17.2246	11.6997	13.6497	10.7247	11.6997	11.6997	13.3247	14.9496	20.7995	14.6246
4	17.2246	11.3747	13.6497	10.3997	12.0247	11.3747	12.9997	14.9496	20.1495	14.6246
5	17.2246	12.0247	13.6497	10.7247	12.0247	11.3747	13.3247	15.2746	20.7995	14.6246
6	17.5496	11.3747	13.3247	10.7247	12.0247	11.3747	12.9997	14.9496	20.4745	14.6246
7	17.2246	11.6997	13.6497	10.7247	11.6997	11.3747	13.3247	14.9496	20.7995	14.6246
8	17.2246	11.3747	13.6497	10.7247	11.6997	11.6997	13.3247	15.2746	20.4745	14.6246
9	17.2246	11.3747	13.9747	10.7247	11.6997	11.3747	12.9997	14.9496	20.4745	14.6246
10	17.5496	11.3747	13.9747	10.7247	11.3747	11.6997	13.3247	14.9496	20.4745	14.6246
11	17.5496	11.6997	13.6497	11.0497	11.3747	11.6997	13.6497	14.9496	20.4745	14.2996
12	17.5496	11.6997	13.9747	10.7247	12.0247	11.3747	13.3247	14.9496	20.7995	14.6246
13	17.5496	11.6997	13.6497	10.3997	12.0247	11.6997	13.3247	14.9496	21.1245	14.6246
14	17.5496	11.6997	13.3247	10.3997	11.3747	11.6997	13.6497	15.2746	20.4745	14.6246
15	17.5496	12.0247	13.6497	10.3997	11.3747	11.6997	12.9997	14.9496	20.7995	14.6246
16	17.5496	11.6997	13.6497	10.7247	11.0497	11.6997	13.3247	14.9496	20.4745	14.6246
17	17.5496	12.0247	13.6497	10.3997	12.0247	11.6997	12.9997	14.9496	20.7995	14.6246
18	17.5496	11.3747	13.6497	10.3997	11.6997	11.6997	13.6497	14.9496	20.7995	14.6246
19	17.5496	11.3747	13.6497	10.3997	12.0247	11.3747	13.3247	14.9496	20.4745	14.6246
20	17.5496	11.3747	13.6497	10.7247	11.6997	11.3747	12.9997	14.9496	20.4745	14.6246
21	17.2246	11.6997	13.9747	10.7247	11.6997	11.6997	13.3247	15.2746	20.4745	14.6246
22	17.5496	11.3747	13.6497	10.7247	11.6997	11.6997	13.3247	15.2746	20.4745	14.6246
23	17.5496	11.6997	13.3247	10.7247	11.3747	11.3747	13.3247	15.2746	20.4745	14.9496
24	17.5496	11.6997	13.9747	10.7247	11.0497	11.3747	13.3247	15.2746	20.1495	14.9496
25	17.5496	11.3747	13.6497	10.7247	11.0497	11.0497	12.9997	14.9496	20.1495	14.6246
26	17.5496	11.6997	13.9747	10.7247	10.7247	11.6997	13.3247	15.2746	20.4745	14.6246
27	17.2246	11.3747	13.6497	10.7247	11.0497	11.3747	13.3247	14.9496	20.4745	14.2996
28	17.5496	11.3747	13.3247	10.7247	11.6997	11.6997	13.3247	14.9496	20.7995	14.2996
29	17.5496	11.6997	12.9997	10.7247	11.3747	11.6997	13.6497	15.2746	20.1495	14.6246
30	17.5496	11.6997	13.6497	10.7247	11.0497	11.3747	13.3247	14.9496	20.4745	14.6246
31	17.5496	11.6997	13.6497	10.7247	11.3747	11.3747	13.6497	14.9496	20.1495	14.6246
32	17.2246	12.0247	13.9747	10.7247	11.3747	11.6997	12.9997	14.9496	20.4745	14.6246
33	17.2246	12.0247	13.6497	10.7247	11.6997	11.3747	13.3247	14.9496	20.4745	14.6246
34	17.5496	12.0247	13.9747	10.7247	11.6997	11.3747	13.3247	14.9496	20.4745	14.9496
35	17.5496	11.6997	13.6497	10.7247	11.6997	11.3747	13.3247	15.2746	20.4745	14.6246
36	17.2246	12.0247	12.9997	10.7247	11.3747	11.3747	13.3247	14.9496	20.7995	14.6246
37	17.5496	12.0247	13.6497	10.7247	11.6997	11.3747	13.3247	14.9496	20.1495	14.6246
38	17.5496	12.0247	13.6497	10.7247	11.6997	11.3747	13.3247	14.9496	20.1495	14.6246
39	17.2246	12.3497	13.3247	10.7247	11.6997	11.3747	13.6497	15.2746	20.4745	14.6246
40	17.5496	11.3747	13.6497	10.7247	11.6997	11.6997	13.3247	15.2746	20.1495	14.6246
41	17.5496	11.6997	13.6497	10.3997	12.0247	11.3747	13.3247	14.9496	20.1495	14.6246
42	17.2246	11.6997	13.3247	10.3997	11.6997	11.3747	13.3247	14.9496	20.1495	14.6246
43	17.5496	11.6997	13.3247	10.7247	11.3747	11.3747	13.3247	14.9496	20.7995	14.6246
44	17.5496	11.6997	13.3247	10.7247	11.6997	11.6997	13.3247	14.9496	20.1495	14.2996
45	17.5496	11.3747	13.6497	10.7247	11.3747	11.3747	13.3247	14.9496	20.1495	14.6246
46	17.2246	11.6997	13.3247	10.7247	11.3747	11.3747	13.6497	14.9496	20.1495	14.2996
47	17.2246	11.3747	13.6497	10.3997	11.6997	11.3747	13.3247	15.2746	20.7995	14.6246
48	17.2246	12.0247	13.6497	10.7247	11.6997	11.3747	13.3247	15.2746	20.1495	14.6246
49	17.2246	11.6997	13.3247	10.7247	11.3747	11.6997	13.6497	15.2746	20.7995	14.6246
50	17.5496	11.6997	13.3247	10.7247	11.6997	11.3747	12.9997	15.2746	20.1495	14.6246
51	17.2246	11.3747	13.3247	10.7247	11.6997	11.3747	13.6497	14.9496	20.7995	14.6246
52	17.5496	11.6997	13.3247	10.7247	11.3747	11.6997	13.3247	14.9496	20.4745	14.6246
53	17.5496	11.6997	13.3247	10.7247	11.3747	11.6997	13.3247	15.2746	20.4745	14.6246
54	17.5496	12.0247	13.6497	10.7247	11.3747	11.3747	13.3247	14.9496	20.1495	14.2996
55	17.2246	11.6997	13.9747	10.7247	11.6997	11.3747	12.9997	15.2746	20.1495	14.6246
56	17.5496	11.3747	13.3247	10.7247	12.0247	11.3747	13.6497	15.2746	20.1495	14.6246
57	17.5496	11.0497	13.3247	10.7247	11.3747	11.3747	13.6497	14.9496	20.4745	14.6246
58	17.2246	11.0497	13.6497	10.7247	12.0247	11.6997	13.6497	15.2746	20.1495	14.6246
59	17.5496	11.6997	13.6497	11.0497	11.3747	11.6997	13.6497	14.9496	20.1495	14.2996
60	17.2246	11.6997	13.6497	10.7247	11.6997	11.3747	13.6497	14.9496	20.1495	14.6246
61	17.5496	11.6997	13.6497	10.7247	11.3747	11.3747	13.6497	14.9496	20.1495	14.6246
62	17.2246	12.0247	13.6497	10.7247	11.0497	11.6997	13.3247	15.2746	20.4745	14.2996
63	17.5496	11.6997	13.3247	10.7247	11.3747	11.6997	13.3247	14.9496	20.4745	14.6246
64	17.5496	11.6997	12.9997	10.7247	11.3747	11.3747	12.6747	15.2746	20.4745	14.6246
65	17.5496	11.6997	13.9747	10.7247	11.3747	11.6997	13.3247	14.9496	20.1495	14.6246
66	17.5496	11.6997	13.3247	10.7247	11.0497	11.3747	12.9997	14.9496	20.1495	14.6246
67	17.5496	11.6997	13.3247	10.7247	11.3747	11.3747	13.6497	15.2746	20.1495	14.6246
68	17.5496	11.6997	12.9997	10.7247	11.0497	11.6997	13.3247	15.5996	20.1495	14.9496
69	17.5496	11.6997	13.9747	10.7247	11.3747	11.3747	13.3247	15.2746	20.1495	14.6246
70	17.2246	11.6997	13.6497	10.7247	11.0497	11.3747	13.3247	15.2746	20.4745	14.6246
71	17.5496	11.3747	13.9747	10.3997	11.3747	11.3747	13.6497	14.9496	20.4745	14.6246
72	17.5496	11.6997	13.6497	10.7247	11.0497	11.6997	13.3247	15.2746	20.4745	14.2996
73	17.5496	11.6997	13.3247	10.7247	11.3747	11.3747	13.3247	14.9496	20.4745	14.6246
74	17.5496	11.3747	12.9997	11.0497	11.0497	11.3747	12.9997	14.9496	20.4745	14.2996
75	17.5496	11.6997	13.6497	10.7247	11.0497	11.3747	12.9997	14.9496	20.1495	14.6246
76	17.5496	11.3747	13.3247	10.7247	11.3747	11.3747	13.3247	14.9496	20.4745	14.6246
77	17.5496	11.3747	13.3247	10.7247	11.0497	11.6997	12.9997	15.5996	20.4745	14.6246
78	17.5496	11.6997	13.6497	10.7247	11.0497	11.3747	12.9997	15.2746	20.4745	14.6246
79	17.5496	11.3747	13.6497	10.3997	11.0497	11.6997	13.3247	15.2746	20.1495	14.6246
80	17.5496	11.6997	13.6497	10.7247	11.0497	11.6997	13.3247	14.9496	20.1495	14.6246
81	17.2246	11.3747	13.6497	10.3997	11.3747	11.6997	13.3247	15.5996	20.1495	14.6246
82	17.5496	11.6997	13.6497	10.7247	11.0497	11.3747	13.3247	15.2746	20.4745	14.6246
83	17.5496	11.6997	13.3247	11.0497	11.0497	11.3747	13.3247	15.2746	20.1495	14.6246
84	17.5496	11.3747	14.6246	10.7247	11.0497	11.3747	13.3247	15.2746	20.7995	14.6246
85	17.2246	11.6997	14.2996	10.7247	11.0497	11.6997	12.9997	14.9496	20.4745	14.6246
86	17.5496	11.6997	13.6497	11.0497	10.7247	11.6997	13.3247	14.9496	20.7995	14.6246
87	17.5496	11.0497	14.2996	11.0497	11.0497	11.6997	12.9997	15.2746	20.1495	14.6246
88	17.5496	11.6997	14.2996	10.7247	11.3747	11.6997	13.6497	15.2746	20.1495	14.2996
89	17.5496	12.0247	13.9747	11.0497	11.3747	11.3747	12.6747	15.2746	20.4745	14.6246
90	17.5496	11.6997	13.9747	10.3997	10.7247	11.3747	12.9997	15.2746	20.1495	14.6246
91	17.5496	11.6997	13.3247	10.7247	11.0497	11.3747	12.9997	15.2746	20.4745	14.6246
92	17.5496	11.6997	13.9747	10.7247	11.3747	11.3747	13.3247	15.5996	20.4745	14.6246
93	17.5496	11.6997	13.6497	10.7247	11.0497	11.6997	13.3247	15.5996	20.4745	14.9496
94	17.5496	11.6997	14.2996	10.7247	11.0497	11.6997	13.3247	15.5996	20.4745	14.2996
95	17.5496	11.3747	13.3247	10.7247	11.3747	11.3747	12.6747	14.9496	20.1495	14.2996
96	17.5496	11.3747	13.3247	10.7247	11.3747	11.3747	12.9997	15.2746	20.1495	14.6246
97	17.5496	11.6997	13.6497	10.7247	11.0497	11.3747	13.3247	15.5996	20.4745	14.2996
98	17.5496	12.0247	13.6497	10.7247	11.0497	11.3747	12.9997	15.2746	20.1495	14.6246
99	17.5496	11.6997	14.2996	10.7247	11.3747	11.3747	13.3247	15.2746	20.1495	14.6246
100	17.5496	11.6997	13.3247	10.7247	11.0497	11.3747	13.3247	15.5996	20.4745	14.2996
101	17.5496	11.6997	13.6497	10.7247	11.6997	11.3747	12.9997	15.2746	20.4745	14.6246
102	17.5496	11.6997	13.9747	10.7247	12.0247	11.3747	13.3247	15.5996	20.4745	14.6246
103	17.5496	11.3747	13.9747	10.7247	12.0247	11.3747	12.9997	15.2746	20.4745	14.6246
104	17.5496	11.6997	13.6497	10.7247	11.6997	11.3747	13.3247	15.2746	20.7995	14.6246
105	17.5496	11.6997	13.3247	10.7247	12.0247	11.3747	13.6497	15.2746	20.7995	14.6246
106	17.5496	11.6997	13.6497	10.7247	11.6997	11.3747	12.9997	15.2746	20.7995	14.2996
107	17.5496	11.6997	13.6497	10.7247	11.0497	11.3747	13.3247	15.2746	20.4745	14.6246
108	17.5496	11.3747	13.9747	10.3997	11.6997	11.3747	13.6497	15.5996	20.4745	14.6246
109	17.5496	11.3747	13.6497	10.3997	11.3747	11.3747	13.3247	15.5996	20.4745	14.2996
110	17.5496	11.3747	13.9747	10.7247	11.6997	11.3747	13.3247	15.2746	20.7995	14.6246
111	17.5496	11.3747	13.3247	10.3997	11.6997	11.3747	12.9997	15.2746	20.1495	14.6246
112	17.5496	11.3747	13.3247	10.3997	11.0497	11.3747	12.3497	15.2746	20.7995	14.6246
113	17.5496	11.3747	12.9997	10.3997	11.3747	11.3747	12.9997	15.2746	20.4745	14.6246
114	17.5496	11.6997	13.3247	10.3997	11.3747	11.3747	13.3247	15.2746	20.7995	14.6246
115	17.5496	11.6997	14.2996	10.7247	11.3747	11.3747	13.3247	15.2746	20.4745	14.2996
116	17.5496	11.6997	13.6497	10.3997	11.3747	11.3747	13.6497	15.2746	20.4745	14.6246
117	17.5496	11.3747	13.3247	10.7247	11.3747	11.3747	13.9747	15.2746	20.4745	14.6246
118	17.5496	11.3747	13.6497	10.7247	11.3747	11.3747	13.3247	15.2746	20.4745	14.6246
119	17.5496	11.6997	12.9997	10.7247	11.3747	11.3747	12.9997	15.2746	20.4745	14.6246
120	17.2246	11.3747	12.9997	10.7247	11.3747	11.3747	12.9997	15.2746	20.7995	14.6246
121	17.5496	11.3747	13.3247	10.7247	11.6997	11.3747	12.6747	15.2746	20.7995	14.6246
122	17.5496	11.3747	13.6497	10.3997	11.6997	11.3747	13.6497	15.2746	20.4745	14.6246
123	17.5496	11.6997	12.9997	10.7247	11.6997	11.3747	13.3247	15.2746	20.4745	14.6246
124	17.2246	11.3747	13.3247	10.7247	11.3747	11.3747	13.3247	15.2746	20.4745	14.6246
125	17.5496	11.6997	13.3247	10.7247	11.6997	11.3747	12.9997	15.2746	20.7995	14.2996
126	17.5496	11.3747	12.9997	10.7247	11.0497	11.3747	12.9997	15.2746	20.7995	14.6246
127	17.5496	11.3747	13.3247	10.7247	11.3747	11.3747	13.3247	15.2746	20.4745	14.6246
128	17.5496	11.0497	13.3247	10.7247	11.3747	11.3747	13.3247	15.2746	20.4745	14.2996
129	17.5496	11.3747	12.6747	10.7247	11.6997	11.6997	13.6497	15.2746	20.7995	14.2996
130	17.5496	11.6997	12.9997	10.3997	11.3747	11.3747	13.3247	15.2746	20.1495	14.2996
131	17.5496	11.3747	12.9997	10.0747	11.6997	11.3747	13.6497	15.2746	20.7995	14.6246
132	17.5496	11.3747	13.6497	10.3997	11.3747	11.3747	13.3247	15.2746	20.4745	14.6246
133	17.5496	11.3747	13.3247	10.3997	11.3747	11.3747	12.9997	15.2746	20.7995	14.2996
134	17.8746	11.3747	12.9997	10.3997	12.0247	11.3747	13.3247	15.2746	20.7995	14.6246
135	17.5496	11.3747	12.6747	10.3997	11.6997	11.3747	12.9997	15.2746	20.1495	14.2996
136	17.5496	11.6997	12.9997	10.3997	11.6997	11.3747	13.3247	15.2746	20.7995	14.2996
137	17.8746	11.6997	12.9997	10.3997	11.3747	11.3747	13.3247	15.2746	20.4745	14.2996
138	17.8746	11.3747	12.9997	10.3997	11.0497	11.3747	13.6497	15.2746	20.4745	14.2996
139	17.5496	11.3747	13.3247	10.7247	12.0247	11.3747	13.6497	15.2746	20.7995	14.6246
140	17.8746	11.0497	12.9997	10.7247	11.0497	11.3747	13.6497	15.2746	19.8245	14.2996
141	17.8746	11.3747	13.3247	10.7247	11.6997	11.3747	13.6497	15.2746	20.7995	14.6246
142	17.2246	11.3747	12.9997	10.7247	11.6997	11.3747	13.6497	15.2746	20.4745	14.6246
143	17.8746	11.6997	12.9997	10.7247	11.3747	11.3747	13.3247	15.2746	20.4745	14.6246
144	17.8746	11.3747	13.3247	10.3997	11.3747	11.3747	13.3247	15.5996	21.1245	14.2996
145	17.5496	11.6997	13.3247	10.7247	12.0247	11.3747	13.3247	15.5996	20.7995	14.6246
146	17.5496	11.6997	12.9997	10.7247	11.6997	11.3747	12.9997	15.2746	20.4745	14.2996
147	17.8746	11.3747	13.6497	10.3997	12.0247	11.3747	12.9997	15.2746	20.7995	14.2996
148	17.5496	11.0497	12.9997	10.7247	11.3747	11.3747	13.3247	15.5996	20.7995	14.6246
149	17.2246	11.3747	12.9997	10.7247	11.3747	11.3747	13.6497	15.2746	20.7995	14.6246
150	17.8746	11.3747	13.3247	10.7247	11.0497	11.3747	13.3247	15.2746	20.7995	14.6246
151	17.5496	11.6997	12.6747	10.7247	11.0497	11.3747	13.6497	15.2746	20.7995	14.2996
152	17.5496	11.3747	13.3247	10.7247	11.6997	11.3747	12.9997	15.2746	20.1495	14.6246
153	17.8746	11.3747	12.9997	10.7247	11.3747	11.3747	13.6497	15.2746	20.7995	14.6246
154	17.5496	11.3747	12.9997	10.7247	11.6997	11.3747	13.3247	15.2746	20.4745	14.6246
155	17.8746	11.3747	12.9997	10.7247	11.6997	11.0497	13.3247	15.2746	20.1495	14.6246
156	17.5496	11.3747	12.9997	10.3997	12.0247	11.3747	13.3247	15.2746	20.4745	14.6246
157	17.8746	11.0497	13.3247	10.7247	11.6997	11.3747	13.6497	15.2746	20.7995	14.6246
158	17.5496	11.3747	13.6497	10.3997	11.6997	11.3747	13.6497	15.5996	20.4745	14.6246
159	17.8746	11.3747	12.9997	10.7247	11.3747	11.3747	12.9997	15.2746	20.7995	14.9496
160	17.8746	11.0497	13.3247	10.7247	12.3497	11.3747	13.3247	15.2746	20.1495	14.6246
161	17.8746	11.3747	12.9997	10.7247	12.0247	11.3747	13.3247	15.2746	20.4745	14.2996
162	17.8746	11.0497	12.9997	10.3997	12.0247	11.3747	13.3247	15.2746	20.4745	14.6246
163	17.8746	11.0497	12.9997	10.7247	11.6997	11.0497	13.3247	15.2746	20.4745	14.2996
164	17.8746	11.3747	12.6747	10.7247	11.6997	11.0497	13.3247	15.5996	20.7995	14.9496
165	17.8746	11.0497	12.9997	10.7247	11.6997	11.0497	13.3247	15.2746	20.1495	14.2996
166	17.8746	11.3747	12.9997	10.7247	11.0497	11.3747	12.9997	15.2746	20.4745	14.2996
167	17.5496	11.3747	12.9997	10.7247	11.0497	11.3747	12.9997	15.5996	21.1245	14.6246
168	18.1995	11.3747	13.3247	10.3997	11.0497	11.0497	13.3247	15.2746	21.1245	14.9496
169	17.8746	11.3747	12.9997	10.7247	11.3747	11.6997	13.3247	15.2746	20.7995	14.2996
170	17.8746	11.3747	12.6747	10.7247	11.0497	11.3747	13.3247	15.2746	20.4745	14.2996
171	17.8746	11.6997	12.9997	10.7247	11.6997	11.3747	13.3247	15.2746	20.4745	14.6246
172	18.1995	11.3747	13.3247	10.7247	11.6997	11.3747	13.6497	15.2746	21.1245	14.6246
173	17.8746	11.3747	12.9997	10.3997	11.6997	11.3747	12.9997	15.2746	20.7995	14.6246
174	17.5496	11.3747	12.9997	10.7247	11.3747	11.0497	13.3247	15.2746	20.7995	14.6246
175	17.8746	11.6997	12.9997	10.3997	11.6997	11.3747	13.6497	15.2746	20.7995	14.6246
176	17.8746	11.6997	12.3497	10.3997	12.3497	11.3747	13.3247	15.2746	21.1245	14.2996
177	17.5496	11.3747	12.6747	10.3997	12.0247	11.3747	13.3247	15.2746	20.4745	14.2996
178	17.8746	11.3747	12.9997	10.3997	11.6997	11.3747	13.6497	15.2746	21.1245	14.6246
179	17.2246	11.3747	12.9997	10.7247	11.6997	11.3747	12.9997	15.2746	20.7995	14.2996
180	17.5496	11.0497	12.9997	10.7247	11.6997	11.3747	12.9997	15.2746	20.4745	14.6246
181	17.5496	11.3747	12.3497	10.3997	11.3747	11.3747	13.3247	15.5996	20.7995	14.6246
182	17.8746	11.3747	12.3497	10.7247	11.3747	11.3747	13.6497	15.2746	20.7995	14.6246
183	17.8746	11.3747	12.9997	10.3997	11.6997	11.0497	12.6747	15.5996	20.7995	14.6246
184	17.5496	11.3747	12.6747	10.3997	11.6997	11.3747	12.6747	15.2746	20.7995	14.6246
185	17.8746	11.3747	12.6747	10.7247	11.3747	11.3747	13.3247	15.2746	20.7995	14.6246
186	17.5496	11.3747	12.9997	10.7247	11.6997	11.0497	13.6497	15.2746	20.4745	14.9496
187	17.5496	11.6997	12.6747	10.7247	12.0247	11.0497	13.3247	15.2746	20.7995	14.6246
188	17.8746	11.6997	13.3247	10.7247	11.6997	11.3747	13.3247	15.2746	20.7995	14.6246
189	18.1995	11.6997	13.6497	10.7247	11.0497	11.3747	12.9997	15.2746	20.4745	14.6246
190	17.5496	11.6997	12.9997	11.0497	11.0497	11.0497	12.9997	15.2746	20.4745	14.6246
191	17.5496	11.3747	13.6497	10.3997	11.6997	11.3747	13.3247	15.2746	20.4745	14.9496
192	17.8746	11.6997	13.3247	10.7247	11.6997	11.0497	13.3247	15.2746	20.4745	14.2996
193	17.5496	11.3747	12.6747	11.0497	12.0247	11.3747	13.3247	15.2746	20.4745	14.6246
194	17.5496	11.3747	12.9997	11.0497	11.3747	11.3747	13.6497	15.2746	20.7995	14.6246
195	17.5496	11.6997	12.6747	10.7247	11.6997	11.3747	12.9997	15.2746	20.4745	14.6246
196	17.5496	11.6997	12.9997	10.7247	11.6997	11.0497	13.3247	15.2746	20.4745	14.9496
197	17.8746	11.3747	13.6497	10.7247	11.6997	11.3747	13.3247	15.2746	21.1245	14.6246
198	18.1995	11.6997	12.6747	10.7247	11.6997	11.3747	12.6747	15.2746	20.4745	14.6246
199	17.5496	11.0497	12.9997	10.7247	12.0247	11.3747	13.3247	15.2746	20.4745	14.9496
200	17.5496	11.3747	12.6747	11.0497	11.6997	11.0497	13.6497	15.2746	20.4745	14.6246
201	17.8746	11.3747	12.6747	11.0497	11.6997	11.3747	13.3247	15.2746	20.7995	14.6246
202	17.5496	11.3747	12.9997	10.7247	11.3747	11.0497	13.3247	15.5996	20.4745	14.9496
203	17.8746	11.3747	13.3247	10.7247	11.6997	11.3747	12.9997	15.2746	20.7995	14.2996
204	17.5496	11.3747	12.6747	10.7247	12.0247	11.0497	13.3247	15.2746	20.4745	14.6246
205	17.8746	11.3747	12.9997	11.0497	11.6997	11.0497	13.3247	15.2746	20.4745	14.6246
206	17.8746	11.3747	12.9997	11.0497	11.6997	11.3747	13.3247	15.2746	20.4745	14.9496
207	17.8746	11.3747	12.9997	11.0497	11.6997	11.3747	13.3247	15.2746	20.1495	14.6246
208	17.8746	11.3747	12.6747	11.0497	11.0497	11.0497	12.9997	15.2746	20.4745	14.6246
209	17.8746	11.3747	12.6747	10.7247	11.3747	11.0497	12.6747	15.2746	20.1495	14.9496
210	17.8746	11.6997	12.9997	10.7247	11.3747	11.3747	13.6497	15.2746	20.4745	14.6246
211	17.8746	11.3747	12.6747	11.0497	11.0497	11.0497	13.3247	15.2746	20.4745	14.6246
212	17.8746	11.6997	12.9997	10.7247	11.3747	11.3747	12.9997	15.2746	20.4745	14.6246
213	17.8746	11.0497	12.6747	10.7247	11.0497	11.3747	13.3247	15.2746	20.4745	14.6246
214	17.8746	11.3747	12.9997	11.0497	11.3747	11.3747	13.3247	15.2746	20.4745	14.6246
215	17.8746	11.0497	12.0247	10.3997	11.3747	11.3747	13.3247	15.2746	20.7995	14.2996
216	17.8746	11.3747	12.9997	11.0497	11.6997	11.3747	12.9997	15.2746	20.4745	14.6246
217	17.8746	11.0497	13.3247	11.0497	11.3747	11.6997	13.3247	15.2746	20.4745	14.6246
218	17.8746	11.0497	13.3247	10.7247	11.6997	11.3747	13.6497	15.2746	20.7995	14.6246
219	17.8746	11.6997	12.6747	10.7247	11.6997	11.0497	12.9997	15.2746	20.7995	14.6246
220	17.8746	11.6997	12.6747	10.7247	11.6997	11.3747	13.3247	15.5996	20.7995	14.6246
221	17.8746	11.3747	12.3497	10.7247	11.6997	11.3747	12.9997	15.2746	20.4745	14.6246
222	17.8746	11.6997	12.6747	10.7247	12.0247	11.3747	13.3247	15.2746	20.7995	14.6246
223	17.8746	11.3747	12.6747	10.7247	11.6997	11.3747	13.3247	15.2746	20.4745	14.6246
224	17.8746	11.0497	12.3497	10.7247	11.6997	11.0497	13.6497	15.2746	20.7995	14.2996
225	18.1995	11.3747	13.3247	10.7247	12.3497	11.3747	12.9997	15.2746	20.4745	14.6246
226	18.1995	11.3747	12.9997	10.7247	12.3497	11.3747	13.3247	15.2746	20.4745	14.6246
227	17.8746	11.3747	12.0247	10.7247	12.0247	11.6997	13.3247	15.5996	20.1495	14.2996
228	17.8746	11.0497	12.6747	10.7247	11.6997	11.3747	13.3247	15.5996	20.4745	14.6246
229	17.8746	12.0247	12.9997	10.7247	11.6997	11.3747	13.6497	15.2746	20.4745	14.6246
230	17.8746	11.6997	12.9997	10.7247	11.6997	11.0497	13.3247	15.2746	20.7995	14.2996
231	17.5496	11.0497	12.9997	10.7247	11.6997	11.3747	13.6497	15.2746	20.4745	14.6246
232	17.8746	11.0497	12.9997	10.7247	11.3747	11.0497	12.9997	15.2746	20.7995	14.6246
233	17.8746	11.3747	12.6747	10.7247	11.0497	11.3747	13.6497	15.2746	20.4745	14.6246
234	17.8746	11.3747	12.6747	10.7247	11.6997	11.3747	13.3247	15.2746	20.1495	14.6246
235	17.8746	11.0497	12.3497	10.3997	11.3747	11.3747	13.6497	15.2746	20.4745	14.6246
236	17.8746	11.6997	12.9997	10.3997	11.6997	11.3747	13.3247	15.2746	21.1245	14.6246
237	17.5496	11.0497	12.0247	10.7247	11.3747	11.3747	13.3247	15.2746	20.4745	14.6246
238	17.8746	11.3747	12.9997	10.7247	11.3747	11.3747	12.9997	15.2746	20.4745	14.6246
239	17.8746	11.0497	12.3497	11.0497	11.6997	11.3747	13.6497	15.2746	20.4745	14.6246
240	17.8746	11.0497	12.9997	10.7247	12.0247	11.3747	13.3247	15.2746	20.7995	14.6246
241	17.5496	11.0497	12.9997	10.7247	11.3747	11.3747	13.3247	15.2746	20.4745	14.6246
242	17.8746	11.0497	12.6747	10.7247	11.3747	11.6997	12.9997	15.2746	20.4745	14.9496
243	17.8746	11.0497	12.6747	10.3997	11.3747	11.3747	12.6747	15.2746	21.1245	14.6246
244	17.8746	11.3747	12.9997	10.7247	11.6997	11.3747	13.3247	15.2746	20.4745	14.6246
245	18.1995	11.6997	12.6747	10.3997	11.0497	11.3747	12.6747	15.5996	20.4745	14.6246
246	18.1995	11.3747	12.6747	10.7247	12.0247	11.3747	13.3247	15.2746	20.4745	14.6246
247	17.8746	11.3747	12.9997	10.7247	11.6997	11.3747	13.6497	15.2746	20.7995	14.6246
248	17.8746	11.0497	12.9997	10.7247	11.6997	11.3747	13.3247	15.2746	20.4745	14.6246
249	17.8746	11.3747	12.9997	10.7247	11.3747	11.0497	13.9747	15.2746	20.1495	14.6246
250	17.8746	11.3747	13.3247	10.3997	11.6997	11.3747	13.3247	15.2746	20.1495	14.6246
251	17.8746	11.0497	12.9997	10.7247	11.6997	11.3747	12.9997	15.2746	20.7995	14.6246
252	18.1995	11.3747	12.6747	10.7247	11.6997	11.6997	12.9997	15.2746	20.1495	14.6246
253	17.8746	11.3747	12.6747	10.7247	11.6997	11.3747	13.3247	15.2746	20.4745	14.6246
254	17.8746	11.6997	12.9997	10.7247	11.6997	11.3747	13.3247	15.2746	20.4745	14.6246
255	17.8746	11.3747	12.6747	10.7247	11.3747	11.6997	13.6497	15.2746	20.4745	14.6246
256	17.8746	11.3747	12.9997	10.7247	11.6997	11.3747	13.3247	15.2746	20.4745	14.6246
257	17.8746	11.3747	12.6747	10.7247	11.3747	11.3747	13.3247	15.2746	21.1245	14.6246
258	17.8746	11.3747	12.6747	10.7247	11.3747	11.3747	13.3247	15.2746	20.4745	14.9496
259	17.8746	11.0497	12.6747	10.7247	11.0497	11.6997	12.9997	15.2746	20.4745	14.6246
260	17.8746	11.3747	12.3497	10.7247	11.3747	11.3747	13.9747	15.2746	20.4745	14.6246
261	17.8746	11.3747	12.6747	10.3997	11.3747	11.3747	12.6747	15.2746	20.4745	14.6246
262	17.8746	11.0497	12.6747	10.3997	11.6997	11.3747	12.9997	15.2746	20.4745	14.6246
263	18.1995	11.3747	12.9997	10.7247	11.6997	11.6997	13.3247	15.2746	20.4745	14.6246
264	17.5496	11.3747	12.9997	10.7247	11.0497	11.0497	13.3247	15.2746	20.4745	14.6246
265	17.8746	11.0497	12.6747	10.7247	11.0497	11.6997	13.6497	15.5996	20.4745	14.6246
266	17.8746	11.6997	12.9997	10.7247	11.3747	11.3747	12.9997	15.2746	20.4745	14.6246
267	17.8746	10.7247	12.3497	10.7247	10.7247	11.3747	12.6747	15.2746	20.7995	14.6246
268	17.8746	11.3747	12.3497	10.3997	10.7247	11.6997	13.3247	15.2746	20.7995	14.6246
269	17.8746	11.3747	12.3497	10.7247	10.7247	11.3747	12.9997	15.2746	20.7995	14.6246
270	17.8746	11.3747	12.6747	10.7247	11.0497	11.3747	12.9997	15.5996	20.4745	14.6246
271	17.8746	11.3747	12.6747	10.7247	10.7247	11.3747	13.3247	15.2746	20.4745	14.6246
272	17.8746	11.3747	12.3497	10.7247	11.3747	11.3747	13.3247	15.2746	20.4745	14.6246
273	17.8746	11.3747	12.6747	10.7247	11.3747	11.6997	13.9747	15.2746	20.4745	14.6246
274	17.5496	11.3747	12.6747	10.7247	11.6997	11.3747	12.9997	15.2746	20.4745	14.6246
275	18.1995	11.3747	12.6747	10.7247	11.3747	11.3747	13.3247	15.5996	20.4745	14.6246
276	18.1995	11.3747	12.9997	10.7247	11.0497	11.3747	12.9997	15.2746	20.4745	14.6246
277	17.8746	11.3747	12.9997	10.7247	11.0497	11.3747	12.6747	15.2746	20.4745	14.6246
278	17.8746	11.3747	12.3497	10.3997	11.0497	11.3747	13.3247	15.2746	20.4745	14.6246
279	17.8746	11.0497	12.9997	10.3997	11.6997	11.3747	12.9997	15.2746	20.4745	14.6246
280	17.8746	11.0497	12.3497	10.3997	11.6997	11.3747	13.3247	15.5996	20.4745	14.6246
281	17.8746	11.3747	12.3497	10.0747	11.6997	11.3747	12.9997	15.2746	20.1495	14.6246
282	17.8746	11.6997	12.3497	10.3997	11.0497	11.3747	13.9747	15.5996	20.4745	14.6246
283	17.8746	11.0497	12.6747	10.7247	11.6997	11.3747	13.3247	15.2746	20.4745	14.6246
284	17.8746	11.0497	12.6747	10.7247	11.6997	11.3747	13.6497	15.2746	20.1495	14.6246
285	17.8746	11.0497	12.9997	10.7247	11.3747	11.3747	12.9997	15.2746	20.4745	14.6246
286	17.8746	11.3747	12.9997	10.7247	11.3747	11.0497	13.3247	15.2746	20.4745	14.6246
287	17.8746	11.3747	13.3247	10.7247	11.0497	11.3747	13.3247	15.2746	20.7995	14.9496
288	17.5496	11.3747	12.6747	10.7247	11.6997	11.3747	12.9997	15.2746	20.7995	13.9747
289	17.8746	11.0497	12.6747	10.7247	11.3747	11.3747	12.9997	15.2746	20.4745	14.6246
290	17.8746	11.3747	12.6747	10.7247	11.3747	11.3747	13.3247	15.2746	20.7995	14.6246
291	17.8746	11.3747	13.3247	10.3997	11.6997	11.6997	12.9997	15.2746	20.4745	14.2996
292	17.5496	11.3747	12.6747	10.3997	11.6997	11.0497	13.6497	15.2746	20.4745	14.6246
293	17.8746	11.0497	13.3247	10.7247	11.3747	11.3747	12.9997	15.2746	20.4745	14.9496
294	17.5496	11.0497	12.9997	10.7247	11.0497	11.6997	12.9997	15.2746	20.4745	14.2996
295	17.8746	11.3747	13.3247	10.7247	11.3747	11.3747	13.6497	15.5996	20.4745	14.6246
296	17.8746	11.3747	12.9997	10.3997	11.0497	11.3747	12.9997	15.2746	20.7995	14.6246
297	18.1995	11.0497	12.9997	10.3997	11.0497	11.3747	13.3247	15.2746	20.4745	14.6246
298	17.8746	11.3747	12.9997	10.3997	11.3747	11.0497	13.3247	15.2746	20.4745	14.6246
299	17.8746	11.6997	12.6747	10.3997	10.7247	11.3747	12.9997	15.2746	20.4745	14.2996
300	17.5496	11.0497	12.3497	10.3997	11.3747	11.0497	13.3247	15.5996	20.4745	14.6246
301	17.8746	11.3747	12.3497	10.7247	11.3747	11.3747	13.6497	15.2746	20.7995	14.2996
302	17.5496	11.0497	12.0247	10.3997	11.0497	11.0497	13.3247	15.5996	20.7995	14.6246
303	17.8746	11.0497	12.9997	11.0497	11.3747	11.6997	12.9997	15.2746	20.1495	14.6246
304	17.5496	11.3747	12.6747	10.3997	11.0497	11.6997	13.3247	15.2746	20.1495	14.2996
305	17.8746	11.3747	12.6747	10.3997	10.3997	11.3747	13.9747	15.2746	20.4745	14.6246
306	17.8746	11.0497	12.3497	10.7247	10.7247	11.3747	12.9997	15.5996	20.4745	14.2996
307	17.5496	11.3747	12.3497	10.7247	11.0497	11.3747	13.6497	15.5996	20.4745	14.6246
308	17.8746	11.3747	12.9997	10.7247	11.0497	11.3747	13.3247	15.2746	20.7995	14.6246
309	17.8746	11.3747	12.9997	10.7247	11.0497	11.3747	13.3247	15.2746	20.4745	14.6246
310	17.8746	11.3747	12.9997	10.3997	11.3747	11.0497	13.3247	15.5996	20.4745	14.2996
311	17.8746	11.3747	12.6747	10.7247	11.0497	11.3747	13.3247	15.5996	20.4745	14.6246
312	17.8746	11.6997	12.9997	10.7247	11.3747	11.0497	12.9997	15.2746	20.7995	14.6246
313	17.8746	11.0497	12.3497	10.7247	11.3747	11.3747	13.6497	15.2746	20.1495	14.6246
314	17.5496	11.3747	12.3497	10.7247	11.3747	11.3747	13.3247	15.2746	20.4745	14.6246
315	17.8746	11.3747	12.0247	10.3997	11.6997	11.3747	12.6747	15.2746	20.4745	14.2996
316	17.8746	11.3747	12.6747	10.3997	11.3747	11.3747	12.9997	15.2746	20.4745	14.6246
317	18.1995	11.3747	12.6747	10.3997	11.3747	11.6997	13.9747	15.5996	20.1495	14.9496
318	17.8746	11.3747	12.6747	10.3997	11.0497	11.3747	12.9997	15.2746	20.4745	14.6246
319	17.8746	11.3747	12.0247	10.3997	11.6997	11.3747	13.3247	15.5996	20.4745	14.9496
320	17.8746	11.3747	12.3497	10.3997	12.0247	11.6997	12.9997	15.2746	20.4745	14.6246
321	17.8746	11.0497	12.3497	10.7247	11.3747	11.3747	13.3247	15.2746	20.4745	14.6246
322	17.8746	11.3747	12.3497	10.3997	11.3747	11.0497	13.3247	15.5996	20.1495	14.2996
323	17.8746	11.3747	12.3497	10.3997	11.6997	11.0497	12.9997	15.2746	20.4745	14.6246
324	17.8746	11.0497	12.3497	10.3997	11.3747	11.0497	12.9997	15.2746	20.4745	14.6246
325	18.1995	11.0497	12.3497	10.3997	11.6997	11.3747	13.3247	15.2746	20.4745	14.2996
326	17.8746	11.3747	12.3497	10.3997	11.3747	11.0497	13.6497	15.5996	20.4745	14.6246
327	17.8746	11.0497	12.3497	10.3997	11.6997	11.3747	12.9997	15.5996	20.4745	14.2996
328	17.8746	11.3747	12.3497	10.3997	12.0247	11.3747	12.9997	15.2746	20.1495	14.6246
329	17.8746	11.3747	12.0247	10.7247	11.3747	11.3747	12.9997	15.2746	20.1495	14.9496
330	17.8746	11.3747	12.6747	10.3997	11.3747	11.3747	13.3247	15.2746	20.1495	14.9496
331	17.8746	11.3747	12.3497	10.3997	12.0247	11.3747	13.3247	15.2746	20.7995	14.6246
332	18.1995	11.3747	12.6747	10.3997	11.3747	11.6997	13.3247	15.5996	20.4745	14.6246
333	17.8746	11.3747	12.6747	10.3997	11.6997	11.3747	13.3247	15.2746	20.4745	14.6246
334	17.8746	11.3747	12.3497	10.3997	11.6997	11.6997	13.3247	15.5996	20.4745	14.6246
335	17.8746	11.0497	12.6747	10.3997	12.0247	11.6997	13.6497	15.5996	20.4745	14.2996
336	17.5496	11.3747	12.9997	10.7247	11.6997	11.3747	12.9997	15.5996	20.7995	14.6246
337	17.8746	11.3747	12.6747	10.3997	12.0247	11.3747	13.3247	15.2746	20.1495	14.6246
338	17.8746	11.3747	12.9997	10.7247	11.6997	11.3747	12.6747	15.2746	20.4745	14.6246
339	18.1995	11.3747	12.9997	10.0747	12.3497	11.6997	13.3247	15.5996	20.7995	14.6246
340	17.8746	11.3747	13.6497	10.7247	12.3497	11.6997	13.3247	15.2746	20.4745	14.6246
341	17.8746	11.3747	12.6747	10.7247	12.3497	11.3747	13.3247	15.2746	20.4745	14.2996
342	18.1995	11.3747	12.9997	10.7247	12.0247	11.6997	12.9997	15.5996	20.4745	14.9496
343	17.8746	11.3747	12.6747	10.0747	11.6997	11.3747	13.9747	15.5996	20.4745	14.2996
344	17.8746	11.3747	12.6747	10.7247	12.3497	11.3747	13.6497	15.2746	20.4745	14.6246
345	17.8746	11.3747	12.6747	10.3997	12.0247	11.3747	12.9997	15.5996	20.4745	14.2996
346	17.8746	11.3747	12.6747	10.7247	12.3497	11.6997	13.3247	15.5996	20.4745	14.2996
347	18.1995	11.3747	12.6747	10.3997	12.3497	11.3747	13.6497	15.2746	19.8245	14.6246
348	17.5496	11.0497	12.6747	10.3997	11.3747	11.3747	12.9997	15.2746	20.4745	14.6246
349	17.8746	11.0497	12.9997	10.3997	11.6997	11.3747	13.6497	15.2746	20.1495	14.6246
350	18.1995	11.3747	12.9997	10.3997	11.3747	11.6997	13.6497	15.5996	20.4745	14.6246
351	18.1995	11.3747	12.9997	10.3997	11.6997	11.6997	12.3497	15.2746	20.4745	14.9496
352	18.1995	11.3747	12.9997	10.3997	11.6997	11.6997	12.9997	15.5996	20.4745	14.2996
353	17.5496	11.3747	12.9997	10.3997	11.6997	11.6997	12.9997	15.5996	20.1495	14.6246
354	17.8746	11.3747	12.9997	10.3997	12.0247	11.3747	12.6747	15.2746	20.4745	14.9496
355	17.5496	11.0497	13.3247	10.3997	12.0247	11.3747	12.9997	15.2746	20.1495	14.2996
356	17.8746	11.0497	12.6747	10.3997	11.6997	11.6997	13.6497	15.2746	20.1495	14.6246
357	17.8746	11.3747	12.3497	10.0747	12.6747	11.6997	13.3247	15.5996	20.4745	14.6246
358	18.1995	11.0497	12.3497	10.0747	11.3747	11.6997	13.3247	15.2746	20.4745	14.6246
359	17.8746	11.0497	12.3497	10.3997	11.3747	11.6997	12.9997	15.2746	20.7995	14.6246
360	18.1995	11.3747	12.9997	10.0747	12.0247	11.3747	13.3247	15.5996	20.1495	14.6246
361	17.8746	11.3747	12.6747	10.0747	11.6997	11.6997	13.3247	15.2746	20.4745	14.6246
362	18.1995	11.0497	12.3497	10.0747	11.6997	11.6997	13.3247	15.2746	20.4745	14.6246
363	17.8746	11.3747	12.6747	10.3997	12.0247	11.3747	13.9747	15.2746	20.1495	14.6246
364	17.8746	11.3747	12.6747	10.3997	12.0247	11.3747	13.3247	15.5996	20.4745	14.6246
365	17.8746	11.3747	12.3497	10.3997	12.0247	11.6997	12.9997	15.2746	20.1495	13.9747
366	18.1995	11.3747	12.9997	10.3997	11.6997	11.3747	13.3247	15.2746	20.4745	14.6246
367	18.1995	11.3747	12.6747	10.3997	12.0247	11.3747	13.3247	15.5996	20.4745	14.6246
368	18.1995	11.3747	12.3497	10.3997	12.0247	11.3747	12.6747	15.2746	20.1495	14.6246
369	18.1995	11.6997	12.3497	10.3997	12.6747	11.6997	13.3247	15.2746	20.1495	14.6246
370	18.1995	11.0497	12.3497	10.3997	11.3747	11.3747	13.3247	15.2746	20.4745	14.6246
371	17.8746	11.0497	12.6747	10.3997	12.0247	11.3747	12.9997	15.2746	20.4745	14.6246
372	17.8746	11.6997	12.6747	10.3997	11.6997	11.3747	12.9997	15.2746	20.4745	14.6246
373	18.1995	11.3747	12.6747	10.3997	12.0247	11.3747	12.9997	15.2746	20.4745	14.6246
374	17.8746	11.3747	12.6747	10.0747	12.0247	11.3747	13.6497	15.2746	19.8245	14.6246
375	18.1995	11.6997	12.3497	10.3997	11.6997	11.3747	13.3247	15.2746	20.4745	14.6246
376	18.1995	11.0497	12.3497	10.0747	12.0247	11.6997	13.6497	15.2746	20.4745	14.6246
377	18.1995	11.6997	12.0247	10.3997	11.3747	11.6997	12.9997	15.5996	20.4745	14.6246
378	18.1995	11.6997	12.3497	10.3997	11.6997	11.6997	13.6497	15.2746	20.1495	14.6246
379	18.1995	11.3747	12.3497	10.3997	11.3747	11.6997	12.9997	15.2746	20.4745	14.6246
380	18.1995	11.6997	12.3497	10.3997	12.0247	11.3747	13.6497	15.2746	20.1495	14.6246
381	18.1995	11.3747	12.3497	10.7247	12.0247	11.3747	13.6497	15.2746	20.4745	14.6246
382	18.1995	11.6997	12.3497	10.3997	11.6997	11.3747	12.6747	15.2746	20.4745	14.6246
383	18.1995	11.3747	12.6747	10.7247	12.0247	11.6997	13.3247	15.2746	20.4745	14.6246
384	18.1995	11.0497	12.6747	10.3997	12.3497	11.3747	13.6497	15.5996	19.8245	14.6246
385	18.1995	11.3747	12.0247	10.3997	11.6997	11.3747	13.3247	15.2746	20.1495	14.6246
386	17.8746	11.3747	12.3497	10.7247	12.0247	11.3747	13.9747	15.2746	20.4745	14.6246
387	18.1995	11.3747	12.6747	10.3997	11.6997	11.3747	12.6747	15.2746	20.1495	14.6246
388	18.1995	11.6997	12.3497	10.7247	11.6997	11.6997	13.3247	15.2746	20.1495	14.2996
389	17.8746	11.3747	12.6747	10.3997	11.6997	11.6997	12.9997	15.2746	20.1495	14.6246
390	18.1995	11.3747	12.0247	10.3997	12.0247	11.6997	13.6497	15.5996	20.4745	14.6246
391	18.1995	11.3747	12.3497	10.0747	12.0247	11.3747	13.6497	15.2746	20.1495	14.6246
392	18.1995	11.3747	12.3497	10.7247	11.3747	11.6997	13.3247	15.5996	20.1495	14.9496
393	18.1995	11.3747	11.6997	10.3997	11.3747	11.6997	13.3247	15.2746	20.4745	14.6246
394	18.1995	11.3747	12.3497	10.3997	11.3747	11.6997	13.3247	15.2746	20.1495	14.6246
395	18.1995	11.3747	12.3497	10.7247	12.3497	11.6997	12.6747	15.2746	20.4745	14.9496
396	18.1995	11.3747	12.6747	10.7247	12.9997	11.3747	12.9997	15.2746	20.7995	14.2996
397	18.1995	11.3747	12.3497	10.7247	12.3497	11.3747	12.6747	15.5996	19.8245	14.6246
398	18.1995	11.0497	12.6747	10.7247	12.3497	11.6997	12.9997	15.2746	20.4745	14.6246
399	18.1995	11.3747	12.3497	10.7247	12.6747	11.3747	13.3247	15.2746	20.4745	14.6246
400	18.1995	11.0497	12.3497	10.3997	12.6747	11.3747	13.9747	15.2746	20.4745	14.6246
401	18.1995	11.3747	12.3497	10.7247	12.3497	11.3747	13.6497	15.2746	20.1495	14.6246
402	18.1995	11.0497	13.3247	10.3997	12.6747	11.6997	12.9997	15.2746	20.1495	14.6246
403	18.5245	11.0497	12.6747	10.7247	12.3497	11.3747	12.9997	15.2746	20.4745	14.6246
404	17.8746	11.6997	12.3497	10.7247	12.3497	11.3747	13.6497	15.5996	20.4745	14.6246
405	18.1995	11.3747	13.3247	10.7247	12.3497	11.6997	12.6747	15.5996	20.1495	14.6246
406	18.1995	11.3747	12.9997	10.7247	12.3497	11.3747	12.9997	15.2746	20.1495	14.6246
407	18.1995	11.3747	12.3497	10.7247	12.3497	11.3747	12.9997	15.2746	20.1495	14.6246
408	18.1995	11.0497	12.3497	10.7247	12.3497	11.3747	12.6747	15.5996	20.4745	14.6246
409	18.1995	11.3747	12.0247	10.7247	12.3497	11.6997	12.6747	15.5996	20.4745	14.2996
410	18.1995	11.3747	11.3747	10.7247	12.3497	11.3747	12.9997	15.2746	20.4745	14.6246
411	18.5245	11.0497	11.6997	10.7247	12.6747	11.6997	13.3247	15.2746	20.1495	14.6246
412	18.1995	11.3747	11.3747	10.7247	13.3247	11.3747	12.9997	15.2746	20.4745	14.6246
413	18.1995	11.3747	11.0497	10.7247	12.9997	11.6997	13.3247	15.2746	20.1495	14.6246
414	18.1995	11.0497	11.6997	10.7247	12.9997	11.6997	12.6747	15.5996	19.8245	14.6246
415	18.1995	11.0497	11.3747	10.7247	13.3247	11.6997	12.9997	15.2746	20.4745	14.6246
416	17.8746	11.0497	12.0247	10.7247	12.9997	12.0247	12.6747	15.2746	20.4745	14.6246
417	18.1995	11.3747	12.0247	10.7247	13.3247	11.6997	12.9997	15.5996	20.4745	14.6246
418	18.1995	11.0497	12.0247	10.7247	12.9997	11.6997	12.9997	15.2746	20.4745	14.9496
419	18.1995	11.3747	12.0247	10.7247	12.9997	11.6997	12.9997	15.2746	20.4745	14.2996
420	18.1995	11.0497	11.6997	10.7247	13.3247	11.6997	12.9997	15.2746	20.4745	14.6246
421	18.1995	12.3497	11.6997	10.3997	13.9747	11.6997	12.6747	15.2746	20.4745	14.9496
422	18.1995	11.6997	12.3497	10.7247	12.9997	11.3747	13.3247	15.2746	20.1495	14.6246
423	18.1995	12.0247	12.3497	10.7247	13.6497	11.3747	13.3247	15.2746	20.4745	14.6246
424	18.1995	11.3747	12.3497	10.7247	13.6497	11.3747	13.6497	15.2746	20.4745	14.6246
425	18.1995	11.6997	11.6997	11.0497	12.9997	11.6997	12.6747	15.2746	20.4745	14.6246
426	18.1995	11.3747	12.0247	10.7247	12.9997	11.3747	12.9997	15.2746	20.7995	14.6246
427	18.5245	12.0247	12.3497	11.0497	12.9997	11.6997	12.6747	15.5996	20.4745	14.6246
428	18.1995	11.6997	12.0247	10.7247	12.9997	11.6997	13.3247	15.2746	20.4745	14.6246
429	18.1995	11.6997	12.6747	10.7247	12.9997	11.6997	12.9997	15.2746	20.4745	14.9496
430	17.8746	11.6997	12.3497	10.7247	12.6747	11.6997	13.6497	15.5996	20.4745	14.6246
431	17.8746	11.6997	12.3497	11.0497	12.9997	11.6997	13.3247	15.2746	20.4745	14.6246
432	18.1995	11.6997	12.3497	11.0497	12.9997	11.6997	13.6497	15.5996	20.4745	14.6246
433	18.1995	12.0247	12.6747	11.0497	12.9997	11.6997	12.9997	15.2746	20.4745	14.6246
434	18.1995	12.0247	12.0247	10.7247	13.3247	11.0497	12.9997	15.2746	20.1495	14.6246
435	18.1995	11.6997	12.6747	10.7247	12.9997	11.3747	12.9997	15.2746	20.4745	14.6246
436	18.5245	11.6997	12.9997	10.7247	12.9997	11.6997	13.3247	15.2746	20.1495	14.6246
437	18.1995	11.6997	12.9997	10.7247	12.6747	11.6997	12.9997	15.2746	20.7995	14.6246
438	18.1995	11.6997	12.6747	10.7247	12.6747	11.6997	13.3247	15.2746	20.4745	14.6246
439	18.1995	12.0247	12.3497	10.7247	12.6747	11.3747	12.9997	15.2746	20.4745	14.6246
440	18.1995	11.6997	12.0247	10.7247	12.9997	11.6997	13.3247	15.2746	20.4745	14.6246
441	17.8746	11.6997	11.6997	10.7247	12.6747	11.6997	13.3247	15.5996	20.7995	14.6246
442	18.1995	11.6997	11.6997	10.7247	12.6747	11.3747	12.9997	15.2746	20.4745	14.9496
443	18.1995	11.6997	12.0247	10.7247	12.9997	11.6997	13.6497	15.2746	20.7995	14.6246
444	18.1995	12.0247	12.0247	10.7247	12.6747	11.6997	13.3247	15.2746	20.4745	14.6246
445	18.1995	11.6997	12.0247	10.7247	12.9997	11.6997	12.9997	15.2746	20.1495	14.6246
446	18.5245	11.6997	11.6997	11.0497	12.6747	11.3747	12.9997	15.2746	20.1495	14.6246
447	18.1995	12.3497	11.6997	10.7247	12.6747	11.3747	12.9997	15.2746	20.4745	14.9496
448	18.5245	11.6997	11.6997	10.7247	12.6747	11.6997	12.9997	15.5996	20.1495	14.9496
449	18.5245	11.6997	11.6997	10.7247	12.9997	11.6997	13.3247	15.2746	20.1495	14.6246
450	18.5245	11.6997	11.3747	10.7247	12.6747	11.6997	12.9997	15.2746	20.1495	14.6246
451	18.1995	11.6997	11.3747	10.7247	13.3247	11.6997	12.6747	15.5996	20.1495	14.9496
452	18.1995	11.6997	11.0497	10.3997	13.6497	11.6997	12.6747	15.5996	20.1495	14.6246
453	18.1995	12.0247	11.6997	10.7247	13.3247	11.6997	12.9997	15.2746	20.7995	14.6246
454	17.8746	12.0247	11.3747	10.7247	12.9997	11.3747	12.9997	15.2746	20.7995	14.6246
455	17.8746	11.6997	12.0247	10.7247	12.6747	11.3747	12.9997	15.2746	20.7995	14.6246
456	18.1995	11.6997	11.6997	10.7247	12.9997	11.6997	12.9997	15.2746	20.4745	14.6246
457	18.1995	12.0247	11.6997	10.3997	12.9997	11.6997	12.9997	15.2746	20.4745	14.6246
458	18.1995	11.6997	11.3747	10.7247	12.6747	11.3747	12.6747	15.2746	20.1495	14.6246
459	18.5245	11.6997	11.0497	10.7247	12.9997	11.3747	13.3247	15.2746	20.4745	14.6246
460	18.1995	11.3747	11.3747	10.7247	12.6747	11.3747	13.3247	15.2746	20.1495	14.6246
461	17.8746	12.0247	10.7247	10.7247	12.9997	11.6997	12.9997	15.2746	20.1495	14.6246
462	18.1995	12.0247	11.6997	10.7247	12.9997	11.3747	13.3247	15.2746	20.4745	14.6246
463	18.5245	11.6997	11.6997	10.7247	12.9997	11.3747	12.9997	14.9496	20.1495	14.6246
464	18.1995	12.3497	11.3747	10.7247	12.6747	11.3747	12.6747	15.2746	20.1495	14.9496
465	17.8746	11.6997	11.3747	10.7247	13.3247	11.3747	13.3247	15.2746	20.4745	14.6246
466	18.1995	12.3497	12.0247	10.7247	13.3247	11.3747	13.6497	15.2746	20.4745	14.6246
467	18.1995	12.3497	11.6997	10.7247	13.3247	11.3747	13.3247	15.2746	20.4745	14.6246
468	18.1995	11.6997	12.0247	10.7247	13.3247	11.6997	13.3247	15.2746	20.4745	14.6246
469	18.8495	11.6997	11.6997	11.0497	12.9997	11.6997	13.6497	15.2746	20.1495	14.9496
470	18.1995	12.0247	11.3747	10.7247	13.3247	11.6997	13.3247	15.2746	20.4745	14.6246
471	18.1995	12.3497	11.6997	11.0497	12.9997	11.6997	12.9997	15.2746	20.4745	14.6246
472	18.1995	12.0247	12.0247	10.7247	12.9997	11.3747	12.9997	15.5996	20.1495	14.6246
473	18.1995	12.0247	11.6997	10.7247	12.9997	11.3747	13.3247	15.2746	20.4745	14.6246
474	18.1995	11.3747	11.6997	10.7247	12.9997	11.3747	12.9997	15.2746	20.1495	14.6246
475	18.5245	12.0247	12.3497	10.7247	12.9997	11.3747	12.9997	15.2746	20.4745	14.6246
476	18.5245	11.6997	12.3497	10.7247	13.3247	11.3747	13.3247	15.2746	20.1495	14.6246
477	18.5245	12.0247	12.0247	10.7247	12.9997	11.6997	12.9997	15.5996	20.7995	14.6246
478	18.5245	11.6997	12.0247	10.7247	13.3247	11.3747	13.3247	15.2746	20.1495	14.6246
479	18.5245	11.6997	12.3497	10.7247	12.6747	12.0247	12.9997	15.2746	20.1495	14.6246
480	18.1995	11.6997	12.0247	11.0497	12.6747	11.6997	12.9997	15.2746	20.4745	14.6246
481	18.5245	11.3747	11.6997	11.0497	13.3247	11.6997	12.9997	15.2746	20.7995	14.6246
482	18.5245	11.6997	12.0247	11.0497	12.6747	11.3747	12.9997	15.2746	20.4745	14.6246
483	18.8495	11.6997	12.6747	11.0497	12.6747	11.6997	12.9997	15.2746	20.4745	14.6246
484	18.5245	12.0247	11.6997	10.7247	12.9997	11.3747	13.6497	15.5996	20.4745	14.6246
485	18.5245	12.0247	12.0247	11.0497	12.6747	11.6997	13.3247	15.2746	20.1495	14.6246
486	18.5245	11.6997	12.6747	10.7247	12.6747	11.6997	12.9997	15.5996	20.4745	14.6246
487	18.1995	12.0247	11.6997	10.7247	12.3497	11.3747	13.3247	15.5996	20.1495	14.6246
488	18.5245	12.0247	11.6997	11.0497	12.3497	11.6997	13.9747	15.2746	20.1495	14.6246
489	18.8495	11.6997	12.6747	11.0497	12.3497	11.6997	13.3247	15.2746	20.4745	14.6246
490	18.5245	12.0247	12.9997	11.0497	12.9997	11.3747	13.3247	15.2746	20.4745	14.6246
491	18.5245	12.0247	12.3497	11.0497	12.3497	11.3747	12.9997	15.2746	20.4745	14.6246
492	18.5245	12.0247	12.6747	11.0497	12.6747	11.6997	13.3247	15.2746	20.4745	14.9496
493	18.5245	12.0247	12.6747	11.0497	12.6747	11.3747	12.9997	14.9496	20.1495	14.6246
494	18.5245	12.0247	12.0247	10.7247	12.6747	11.6997	13.6497	15.2746	20.1495	14.6246
495	19.1745	11.3747	12.9997	10.7247	12.9997	11.6997	12.9997	15.2746	20.4745	14.6246
496	18.5245	12.0247	12.3497	11.0497	12.9997	11.3747	13.6497	15.2746	20.4745	14.6246
497	18.8495	11.6997	12.9997	11.0497	12.9997	11.3747	13.3247	15.2746	20.7995	14.6246
498	18.5245	12.0247	13.6497	11.3747	13.3247	11.3747	12.9997	15.2746	20.1495	14.6246
499	18.5245	12.0247	13.6497	11.0497	12.3497	11.3747	12.6747	15.5996	20.4745	14.6246
500	18.1995	12.0247	13.6497	11.0497	12.3497	11.6997	13.9747	15.2746	20.4745	14.6246
501	18.1995	12.0247	11.6997	11.3747	12.6747	11.6997	12.9997	15.2746	20.7995	14.6246
502	18.8495	11.6997	11.6997	11.0497	12.0247	11.6997	13.3247	15.2746	20.4745	14.6246
503	18.8495	12.0247	12.6747	11.0497	13.9747	11.6997	12.9997	15.5996	20.4745	14.6246
504	18.5245	11.6997	12.9997	11.0497	13.3247	11.6997	13.9747	15.2746	20.1495	14.6246
505	18.1995	12.0247	12.3497	11.0497	13.3247	11.6997	12.6747	15.2746	20.1495	14.6246
506	18.5245	12.0247	12.6747	11.0497	12.9997	11.3747	12.9997	15.2746	20.4745	14.6246
507	18.5245	12.0247	12.3497	11.3747	13.6497	11.6997	12.9997	15.2746	20.4745	14.9496
508	18.8495	12.0247	12.3497	11.3747	13.6497	11.6997	12.9997	15.2746	20.4745	14.6246
509	18.1995	12.0247	12.3497	11.0497	12.6747	11.3747	13.3247	15.2746	20.4745	14.6246
510	18.5245	12.0247	12.3497	11.0497	13.3247	11.6997	12.6747	15.2746	20.4745	14.6246
511	18.5245	12.0247	12.3497	11.0497	11.6997	11.3747	12.9997	15.2746	20.1495	14.6246
512	18.5245	12.0247	13.3247	11.0497	12.3497	11.3747	13.3247	15.2746	20.1495	14.6246
513	18.5245	11.6997	12.6747	11.0497	12.0247	11.3747	13.3247	15.2746	20.4745	14.2996
514	18.5245	11.6997	12.0247	10.7247	12.0247	11.3747	12.9997	15.2746	20.1495	14.6246
515	18.8495	12.0247	12.0247	11.3747	12.3497	11.6997	13.6497	15.2746	20.1495	14.6246
516	18.5245	12.0247	12.3497	11.0497	12.9997	11.6997	12.9997	15.2746	20.1495	14.2996
517	18.1995	12.3497	12.3497	11.0497	12.9997	11.3747	13.3247	15.2746	20.7995	14.9496
518	18.5245	11.6997	12.3497	11.0497	12.6747	11.3747	13.6497	15.2746	20.1495	14.6246
519	18.5245	12.0247	12.9997	11.3747	12.9997	11.6997	12.9997	15.2746	20.4745	14.6246
520	18.5245	11.6997	12.3497	10.7247	12.6747	11.3747	13.3247	15.2746	20.1495	14.6246
521	18.5245	12.0247	12.6747	11.0497	12.9997	11.6997	12.9997	15.2746	20.1495	14.6246
522	18.1995	11.6997	13.3247	11.0497	12.3497	11.6997	12.6747	15.2746	20.1495	14.6246
523	18.1995	12.0247	12.6747	11.0497	12.3497	11.3747	12.9997	15.2746	20.7995	14.6246
524	18.1995	12.0247	12.9997	10.7247	12.6747	11.3747	13.6497	15.2746	20.1495	14.6246
525	18.1995	12.0247	12.9997	11.0497	13.3247	11.6997	13.6497	15.2746	20.1495	14.6246
526	18.1995	11.6997	12.9997	11.0497	12.6747	11.6997	13.3247	15.2746	20.1495	14.6246
527	18.5245	12.0247	12.6747	11.0497	13.3247	11.6997	13.3247	15.5996	20.1495	14.6246
528	18.5245	12.0247	12.3497	11.0497	12.6747	11.3747	12.9997	15.2746	20.7995	14.6246
529	18.5245	11.6997	12.0247	11.0497	13.3247	11.6997	12.9997	15.2746	20.4745	14.2996
530	18.5245	11.6997	12.6747	11.0497	13.6497	11.3747	12.9997	15.2746	20.4745	14.2996
531	18.1995	11.6997	12.9997	11.0497	13.6497	11.3747	12.9997	15.2746	20.1495	14.2996
532	18.1995	11.6997	12.3497	10.7247	12.9997	11.3747	12.9997	15.2746	20.1495	14.2996
533	18.1995	12.0247	12.6747	11.0497	12.6747	11.6997	12.9997	15.2746	20.4745	14.6246
534	18.5245	12.0247	12.9997	11.0497	13.3247	11.3747	12.6747	15.2746	20.1495	14.2996
535	18.1995	11.6997	12.3497	10.7247	12.9997	11.3747	12.9997	15.5996	20.1495	14.9496
536	18.1995	12.0247	12.6747	10.7247	12.9997	11.6997	12.9997	15.2746	20.4745	14.6246
537	18.1995	12.0247	12.9997	10.7247	12.9997	11.3747	12.9997	15.2746	20.1495	14.2996
538	17.8746	12.0247	12.6747	10.7247	12.9997	11.6997	13.3247	15.2746	20.4745	14.2996
539	18.5245	11.6997	12.3497	10.7247	12.6747	11.3747	12.6747	15.2746	20.1495	14.2996
540	18.5245	12.3497	12.6747	10.7247	12.6747	11.6997	12.9997	15.2746	20.1495	14.2996
541	18.1995	11.3747	12.0247	10.3997	13.6497	11.3747	13.3247	15.2746	20.4745	14.6246
542	18.1995	11.6997	12.6747	10.3997	13.3247	11.3747	12.6747	15.2746	20.1495	14.6246
543	18.1995	11.6997	12.3497	10.7247	13.6497	11.6997	13.3247	15.2746	20.1495	14.2996
544	17.8746	12.3497	12.9997	10.7247	12.9997	11.3747	13.3247	15.2746	20.1495	14.6246
545	18.5245	12.0247	12.6747	10.7247	13.6497	11.3747	12.9997	15.5996	20.4745	14.6246
546	18.5245	12.0247	12.9997	10.3997	13.3247	11.6997	12.9997	15.2746	19.8245	14.9496
547	18.5245	12.0247	12.3497	10.7247	13.3247	11.3747	12.6747	15.2746	20.1495	14.6246
548	18.5245	11.6997	12.9997	10.7247	12.9997	11.6997	12.6747	15.2746	20.4745	14.6246
549	18.5245	12.0247	13.3247	10.7247	12.9997	11.3747	12.9997	15.2746	20.1495	14.2996
550	18.1995	12.0247	12.9997	10.7247	13.9747	11.6997	12.9997	15.2746	20.1495	14.6246
551	18.5245	12.3497	13.3247	10.7247	12.9997	11.6997	12.3497	15.2746	20.1495	14.2996
552	18.5245	12.0247	12.9997	10.7247	13.3247	11.3747	12.9997	15.2746	20.1495	14.2996
553	19.1745	12.0247	12.3497	10.7247	12.9997	11.3747	13.3247	15.2746	20.1495	14.6246
554	18.5245	12.0247	12.6747	10.7247	12.9997	11.6997	12.6747	15.5996	20.1495	14.6246
555	18.5245	12.0247	12.9997	10.7247	12.9997	12.0247	13.6497	15.2746	20.4745	14.6246
556	18.1995	12.0247	13.3247	10.7247	12.6747	11.3747	12.9997	15.2746	20.1495	14.6246
557	18.1995	12.0247	12.9997	10.7247	12.9997	11.3747	13.3247	15.2746	20.1495	13.9747
558	18.1995	12.0247	12.9997	10.7247	12.9997	11.3747	12.9997	15.2746	20.1495	14.6246
559	17.8746	12.0247	12.6747	10.7247	12.9997	11.3747	12.6747	15.2746	20.1495	14.2996
560	18.5245	11.6997	12.6747	10.7247	13.3247	11.3747	12.9997	15.5996	20.1495	14.6246
561	18.5245	12.0247	12.9997	10.7247	13.3247	11.6997	12.9997	15.2746	19.8245	14.6246
562	18.5245	12.0247	12.9997	11.0497	12.9997	11.6997	13.6497	15.2746	20.1495	14.9496
563	18.5245	11.6997	13.6497	11.0497	13.3247	11.6997	13.3247	15.2746	20.1495	14.2996
564	18.5245	12.0247	13.3247	10.7247	12.9997	11.6997	13.3247	15.2746	20.1495	14.6246
565	18.5245	12.0247	12.3497	10.7247	12.9997	11.6997	13.3247	15.2746	20.1495	14.2996
566	18.1995	12.0247	12.9997	11.0497	12.9997	11.6997	13.3247	15.2746	19.8245	14.6246
567	18.1995	12.0247	12.9997	10.7247	13.6497	11.3747	13.3247	15.2746	19.8245	14.6246
568	18.5245	12.0247	12.9997	11.0497	12.9997	11.3747	12.9997	15.2746	20.1495	14.6246
569	18.5245	12.0247	12.9997	10.7247	12.6747	11.6997	12.9997	15.5996	20.1495	14.2996
570	18.1995	12.0247	12.9997	10.7247	12.6747	11.3747	12.9997	15.5996	20.4745	14.6246
571	18.5245	12.0247	13.6497	10.7247	12.9997	11.3747	13.3247	15.5996	20.1495	14.6246
572	18.5245	12.3497	12.6747	10.7247	12.6747	11.6997	12.9997	15.2746	20.4745	14.6246
573	18.5245	11.6997	13.3247	10.7247	12.9997	11.3747	12.9997	15.2746	20.4745	14.6246
574	18.5245	12.3497	12.6747	10.7247	13.3247	11.6997	12.9997	15.2746	20.1495	14.6246
575	18.5245	12.0247	13.3247	10.7247	12.9997	11.6997	13.3247	15.2746	20.1495	14.6246
576	18.1995	12.0247	12.3497	10.7247	12.9997	11.3747	12.9997	15.2746	20.4745	14.6246
577	18.8495	11.6997	13.3247	10.7247	13.3247	11.3747	12.6747	15.2746	20.1495	14.6246
578	18.5245	12.0247	13.3247	10.7247	13.3247	11.6997	13.3247	15.5996	20.1495	14.6246
579	18.1995	12.0247	12.6747	10.7247	13.6497	11.6997	12.9997	15.5996	20.1495	14.6246
580	18.1995	12.0247	12.6747	10.7247	13.3247	11.6997	13.3247	15.2746	20.1495	14.6246
581	18.1995	12.6747	12.9997	10.7247	12.6747	11.0497	12.9997	15.2746	20.1495	14.6246
582	18.1995	12.0247	13.3247	10.7247	12.9997	11.6997	13.3247	15.2746	20.1495	14.6246
583	18.8495	12.3497	12.6747	10.7247	12.9997	11.3747	12.6747	15.2746	20.4745	14.9496
584	18.5245	11.6997	12.9997	10.7247	12.6747	11.3747	12.9997	15.2746	20.1495	14.2996
585	18.8495	12.0247	12.6747	10.7247	12.9997	11.6997	12.9997	15.2746	20.4745	14.6246
586	18.5245	12.0247	13.3247	10.7247	12.9997	11.6997	12.9997	15.5996	20.4745	14.6246
587	18.1995	12.0247	12.6747	10.7247	12.9997	11.3747	12.9997	15.9246	20.1495	14.6246
588	18.8495	12.0247	12.9997	10.7247	13.3247	11.3747	13.3247	15.2746	20.4745	14.6246
589	18.5245	12.3497	12.9997	10.7247	12.9997	11.6997	12.9997	15.2746	20.4745	14.6246
590	18.8495	12.0247	12.6747	10.7247	12.9997	11.3747	12.6747	15.2746	20.4745	14.6246
591	18.1995	11.6997	12.9997	10.7247	13.3247	11.3747	12.9997	15.2746	20.4745	14.2996
592	18.5245	12.0247	12.9997	10.7247	12.9997	11.6997	12.9997	15.2746	20.4745	14.6246
593	18.5245	11.6997	12.6747	10.3997	13.6497	11.6997	12.9997	15.5996	19.8245	14.6246
594	18.1995	12.0247	12.9997	11.0497	12.9997	11.6997	12.6747	15.5996	20.1495	14.2996
595	18.1995	11.6997	13.3247	10.7247	12.9997	11.6997	12.6747	15.2746	20.4745	14.6246
596	17.8746	11.6997	12.6747	10.7247	12.9997	11.3747	12.9997	15.2746	20.1495	14.6246
597	18.5245	11.6997	12.9997	10.7247	12.9997	11.6997	13.3247	15.2746	20.4745	14.2996
598	18.1995	11.6997	13.3247	10.7247	13.3247	11.3747	12.9997	15.2746	20.1495	14.6246
599	18.5245	11.6997	13.3247	10.7247	12.9997	11.6997	13.3247	15.2746	20.1495	14.6246
600	18.8495	11.6997	12.3497	11.0497	12.9997	11.6997	13.3247	15.5996	20.4745	14.2996
601	18.5245	11.6997	12.9997	11.0497	12.9997	11.6997	13.3247	15.5996	20.1495	14.6246
602	18.5245	12.0247	12.9997	11.0497	12.9997	11.3747	13.6497	15.5996	20.1495	14.6246
603	18.8495	11.6997	12.9997	11.0497	12.3497	11.6997	12.6747	15.2746	20.4745	14.2996
604	18.1995	12.0247	12.6747	11.0497	13.6497	11.6997	13.6497	15.5996	20.1495	14.2996
605	18.8495	11.6997	12.9997	10.7247	13.3247	11.6997	12.9997	15.2746	20.1495	14.6246
606	18.5245	12.0247	13.3247	11.0497	12.9997	11.6997	12.9997	15.2746	20.1495	14.2996
607	18.1995	12.0247	12.6747	11.0497	12.9997	11.6997	12.9997	15.2746	20.1495	14.6246
608	18.5245	12.0247	12.6747	11.0497	12.9997	11.3747	12.9997	15.2746	20.4745	14.6246
609	18.5245	11.6997	12.9997	11.0497	12.9997	11.3747	12.6747	15.2746	20.4745	14.2996
610	18.1995	12.0247	12.9997	10.7247	12.9997	11.6997	12.9997	15.5996	20.1495	14.6246
611	18.1995	12.0247	13.3247	11.0497	13.6497	11.3747	12.6747	15.2746	20.4745	14.2996
612	18.5245	12.0247	12.9997	11.0497	12.9997	11.6997	12.9997	15.2746	20.1495	14.2996
613	18.5245	12.0247	12.9997	11.0497	12.9997	11.6997	12.9997	15.2746	20.4745	14.6246
614	18.8495	11.6997	13.3247	11.0497	12.9997	11.3747	12.9997	15.2746	20.1495	14.6246
615	18.8495	12.0247	13.3247	11.0497	13.3247	12.0247	12.6747	15.2746	20.1495	14.6246
616	18.5245	12.0247	12.6747	10.3997	12.9997	11.6997	12.6747	15.2746	20.1495	14.6246
617	18.5245	12.0247	12.9997	11.0497	12.9997	11.6997	12.6747	15.2746	20.1495	14.6246
618	18.1995	11.6997	12.9997	11.0497	12.6747	11.6997	12.3497	15.2746	20.4745	14.2996
619	18.5245	12.0247	12.9997	10.7247	13.3247	11.3747	13.3247	15.5996	20.4745	14.6246
620	18.1995	12.0247	12.6747	10.7247	12.9997	11.6997	12.6747	15.2746	20.1495	14.6246
621	18.1995	12.0247	12.6747	11.0497	12.9997	11.3747	12.9997	15.2746	20.4745	14.2996
622	18.5245	12.0247	12.9997	10.7247	12.9997	11.6997	13.3247	15.2746	20.1495	14.6246
623	18.1995	12.0247	12.9997	10.7247	12.9997	11.3747	12.6747	15.2746	20.4745	14.6246
624	18.5245	12.0247	13.3247	10.7247	12.9997	11.3747	12.9997	15.2746	20.4745	14.6246
625	18.1995	12.0247	12.9997	10.7247	12.9997	11.6997	12.9997	15.2746	20.1495	14.6246
626	18.1995	11.6997	12.6747	10.7247	13.3247	11.3747	12.9997	15.2746	20.4745	14.6246
627	18.5245	12.0247	12.6747	10.7247	12.6747	11.6997	12.9997	15.2746	20.4745	14.6246
628	18.5245	12.0247	12.3497	10.7247	13.3247	11.6997	12.6747	15.2746	20.1495	14.6246
629	18.5245	12.0247	12.6747	10.7247	12.3497	11.6997	12.3497	15.2746	20.1495	14.2996
630	18.1995	12.0247	12.3497	10.7247	12.0247	11.6997	13.3247	15.2746	20.1495	14.6246
631	18.8495	11.3747	12.9997	10.7247	13.9747	11.6997	12.9997	15.2746	20.1495	14.2996
632	18.5245	12.0247	12.6747	10.7247	13.3247	11.6997	12.6747	15.2746	20.1495	14.6246
633	19.1745	12.0247	12.9997	10.7247	13.3247	11.6997	12.9997	15.2746	20.4745	14.2996
634	18.5245	11.6997	12.6747	10.7247	13.9747	11.6997	12.9997	15.2746	20.1495	14.6246
635	18.5245	12.0247	12.6747	11.0497	13.9747	11.3747	12.3497	15.2746	20.1495	14.9496
636	18.5245	12.0247	12.6747	10.7247	12.3497	11.6997	13.3247	15.5996	20.1495	14.2996
637	18.5245	11.6997	12.9997	10.7247	13.3247	11.3747	12.6747	15.5996	20.1495	14.6246
638	18.8495	12.0247	12.9997	11.0497	13.3247	11.3747	12.9997	15.5996	20.1495	14.6246
639	18.5245	12.0247	12.6747	10.7247	13.6497	11.3747	12.9997	15.2746	20.1495	14.2996
640	18.5245	12.0247	12.6747	10.3997	14.2996	11.3747	12.3497	15.2746	20.4745	14.2996
641	18.1995	12.0247	12.6747	10.7247	13.6497	11.6997	12.6747	15.2746	20.4745	14.6246
642	18.1995	12.0247	12.9997	10.7247	13.6497	11.3747	12.9997	15.2746	20.1495	14.2996
643	18.5245	11.6997	12.3497	10.7247	13.6497	11.6997	12.3497	15.2746	20.4745	14.6246
644	18.8495	11.6997	12.6747	10.7247	13.6497	11.6997	12.6747	15.2746	20.1495	14.6246
645	18.5245	12.0247	12.6747	10.7247	13.6497	11.3747	13.3247	15.2746	20.1495	14.2996
646	18.5245	11.6997	12.9997	10.7247	13.6497	11.6997	13.3247	15.2746	20.4745	14.6246
647	18.8495	11.6997	13.3247	11.3747	13.3247	11.6997	13.3247	15.2746	20.4745	14.2996
648	18.5245	12.0247	12.9997	11.0497	13.6497	11.3747	13.3247	15.5996	19.8245	14.2996
649	18.5245	11.6997	12.6747	10.7247	13.6497	11.3747	12.9997	15.2746	19.8245	14.6246
650	18.5245	12.0247	12.6747	10.7247	13.9747	11.3747	12.6747	15.2746	19.8245	14.6246
651	18.1995	11.6997	12.3497	10.7247	13.3247	11.6997	12.9997	15.2746	20.4745	14.6246
652	18.5245	11.6997	12.3497	10.7247	13.6497	11.6997	12.9997	15.2746	20.1495	14.6246
653	18.8495	11.6997	12.6747	10.7247	13.6497	11.6997	12.3497	15.2746	20.1495	14.6246
654	18.8495	12.0247	12.3497	10.7247	13.6497	11.6997	12.9997	15.2746	20.1495	14.6246
655	18.1995	11.6997	12.6747	10.7247	13.6497	11.6997	12.6747	15.2746	20.4745	14.2996
656	18.8495	11.6997	12.6747	10.7247	13.6497	11.6997	12.6747	15.5996	20.1495	14.2996
657	18.1995	11.6997	12.3497	11.0497	12.9997	11.6997	12.9997	15.2746	20.1495	14.2996
658	18.1995	12.0247	12.6747	10.7247	13.3247	11.6997	12.9997	15.2746	20.1495	14.6246
659	18.1995	11.6997	12.6747	10.3997	14.2996	11.6997	12.6747	15.5996	19.8245	14.6246
660	18.5245	11.6997	13.3247	10.3997	14.2996	11.6997	13.3247	15.5996	20.1495	14.2996
661	18.5245	11.6997	12.3497	10.3997	13.9747	11.3747	12.3497	15.5996	19.8245	14.2996
662	18.1995	11.6997	12.9997	10.7247	13.9747	11.3747	12.9997	15.5996	19.8245	14.2996
663	18.5245	12.0247	12.6747	11.0497	13.6497	11.6997	12.6747	15.5996	20.1495	14.6246
664	18.5245	11.6997	12.6747	10.7247	13.9747	12.0247	12.9997	15.2746	20.1495	14.6246
665	18.1995	12.0247	12.9997	10.7247	14.2996	11.6997	13.3247	15.2746	20.4745	14.6246
666	18.1995	12.0247	12.6747	10.3997	13.9747	11.6997	12.9997	15.2746	20.1495	14.6246
667	18.5245	11.6997	12.3497	10.7247	13.9747	11.6997	12.6747	15.2746	20.1495	14.6246
668	18.5245	11.6997	12.3497	10.7247	13.6497	11.6997	12.9997	15.2746	20.1495	14.2996
669	18.5245	11.6997	12.6747	11.0497	13.6497	11.6997	12.9997	15.2746	19.8245	14.2996
670	17.8746	11.6997	12.6747	10.7247	13.9747	11.6997	12.9997	15.2746	19.8245	14.6246
671	18.5245	12.0247	12.6747	11.0497	14.2996	11.3747	12.9997	15.2746	20.1495	14.6246
672	18.1995	12.0247	12.6747	11.0497	13.9747	11.6997	12.9997	15.2746	19.8245	14.6246
673	18.1995	11.6997	12.6747	11.3747	13.9747	11.6997	12.6747	15.2746	20.1495	14.9496
674	18.1995	12.0247	12.3497	11.0497	13.6497	11.3747	12.6747	15.5996	20.1495	14.2996
675	18.5245	12.0247	13.3247	11.0497	13.6497	11.3747	12.6747	15.2746	20.4745	14.6246
676	18.5245	12.0247	12.3497	11.0497	13.9747	11.3747	12.9997	15.5996	19.8245	14.2996
677	18.5245	12.0247	12.6747	10.7247	13.6497	11.6997	12.9997	15.5996	20.1495	14.2996
678	18.1995	12.0247	12.9997	11.0497	13.9747	11.6997	12.6747	15.5996	20.1495	14.6246
679	18.1995	12.0247	13.3247	11.0497	13.6497	11.6997	12.9997	15.5996	20.1495	14.6246
680	18.1995	11.6997	12.6747	11.0497	13.9747	11.6997	12.3497	15.5996	20.1495	14.2996
681	18.5245	11.6997	12.3497	10.7247	13.9747	11.6997	12.9997	15.2746	19.8245	14.6246
682	18.5245	12.0247	13.3247	10.7247	13.9747	11.3747	12.6747	15.2746	20.4745	14.6246
683	18.5245	12.0247	12.6747	11.3747	14.6246	11.6997	13.6497	15.5996	20.1495	14.6246
684	18.1995	11.6997	12.9997	11.0497	14.2996	11.6997	13.3247	15.2746	20.1495	14.2996
685	18.5245	12.0247	12.6747	11.3747	13.6497	11.6997	12.9997	15.5996	20.1495	14.6246
686	18.5245	11.6997	13.3247	11.3747	13.6497	11.3747	12.9997	15.2746	20.1495	14.6246
687	18.5245	11.6997	12.3497	11.0497	14.6246	11.3747	12.6747	15.2746	19.8245	14.2996
688	18.1995	12.0247	12.3497	11.0497	12.9997	11.6997	12.3497	15.5996	19.8245	14.6246
689	18.5245	12.0247	12.6747	11.3747	13.3247	11.6997	12.6747	15.2746	20.1495	14.6246
690	18.8495	11.6997	12.6747	11.3747	13.9747	11.3747	13.3247	15.2746	20.1495	14.6246
691	18.5245	11.6997	12.3497	11.3747	13.9747	11.6997	12.9997	15.2746	20.1495	14.6246
692	18.5245	12.0247	13.3247	11.3747	14.2996	11.6997	12.9997	15.5996	20.1495	14.2996
693	18.1995	11.6997	12.9997	11.3747	13.3247	11.6997	12.6747	15.2746	20.4745	14.2996
694	18.5245	12.0247	12.3497	11.3747	13.6497	11.3747	13.3247	15.2746	19.8245	14.6246
695	18.5245	12.0247	12.9997	11.3747	13.6497	11.3747	12.9997	15.2746	20.1495	14.2996
696	18.5245	12.0247	13.3247	11.0497	13.9747	11.6997	13.3247	15.2746	20.1495	14.6246
697	18.5245	12.3497	12.6747	11.0497	13.9747	11.6997	12.9997	15.2746	19.8245	14.2996
698	18.1995	12.3497	12.9997	11.3747	13.9747	11.6997	12.6747	15.5996	20.4745	14.2996
699	18.1995	12.0247	12.9997	11.6997	13.6497	11.6997	12.9997	15.5996	20.1495	14.6246
700	18.5245	12.0247	12.6747	11.3747	13.9747	11.3747	12.9997	15.5996	20.1495	14.2996
701	18.1995	11.6997	12.9997	11.3747	13.9747	11.6997	12.6747	15.2746	20.1495	14.2996
702	18.5245	11.6997	12.6747	11.3747	13.9747	11.3747	13.3247	15.5996	20.1495	14.6246
703	18.5245	11.6997	12.6747	11.3747	13.9747	11.3747	12.6747	15.2746	20.1495	14.6246
704	18.5245	12.0247	12.9997	11.6997	14.2996	11.3747	12.9997	15.2746	20.4745	14.2996
705	18.5245	11.6997	12.9997	11.6997	13.9747	11.6997	12.9997	15.2746	20.1495	14.6246
706	17.8746	12.0247	12.6747	11.6997	13.3247	11.6997	13.3247	14.9496	19.8245	14.2996
707	18.1995	12.0247	12.9997	11.6997	14.2996	11.6997	12.6747	15.2746	20.1495	14.6246
708	18.8495	11.6997	12.6747	11.3747	13.3247	11.3747	12.9997	15.5996	19.8245	14.6246
709	18.5245	11.6997	12.9997	11.6997	14.2996	11.6997	13.9747	15.2746	19.8245	14.2996
710	18.1995	11.6997	12.3497	11.3747	14.2996	11.6997	12.9997	15.2746	20.1495	14.6246
711	18.5245	12.0247	12.6747	11.6997	13.3247	11.3747	12.6747	15.5996	20.1495	14.2996
712	18.5245	12.0247	12.6747	11.3747	13.9747	11.3747	12.6747	15.5996	20.4745	14.2996
713	18.5245	12.0247	12.9997	11.6997	13.9747	11.3747	12.6747	15.5996	20.7995	14.6246
714	19.1745	12.0247	12.6747	11.6997	13.3247	11.6997	12.9997	15.2746	21.1245	14.6246
715	18.8495	12.0247	12.6747	11.6997	13.9747	11.3747	13.3247	15.2746	20.7995	14.6246
716	18.5245	11.6997	12.3497	11.6997	13.9747	11.6997	13.3247	15.5996	20.4745	14.6246
717	18.1995	11.6997	12.3497	11.6997	13.6497	11.6997	12.6747	15.2746	20.4745	14.2996
718	18.5245	12.0247	12.3497	12.0247	13.3247	11.3747	13.6497	15.5996	20.4745	14.6246
719	18.5245	11.6997	12.0247	12.0247	13.3247	11.6997	13.3247	15.5996	21.1245	14.2996
720	18.8495	11.6997	12.3497	12.0247	13.3247	11.3747	12.6747	15.5996	20.7995	14.6246
721	18.5245	11.6997	12.3497	12.0247	13.6497	11.6997	12.9997	15.5996	20.4745	14.6246
722	18.5245	12.0247	12.3497	12.0247	13.6497	11.6997	13.3247	15.2746	21.1245	14.6246
723	18.5245	11.6997	12.6747	11.6997	13.3247	11.6997	12.9997	15.5996	21.1245	14.6246
724	18.5245	11.6997	12.6747	11.6997	14.2996	11.6997	12.6747	15.2746	20.7995	14.2996
725	18.8495	12.0247	12.6747	11.6997	14.2996	11.6997	12.6747	15.2746	20.7995	14.6246
726	18.5245	11.6997	13.3247	11.6997	14.2996	11.6997	13.3247	15.2746	20.7995	14.6246
727	18.5245	12.0247	12.6747	11.6997	14.2996	11.6997	13.3247	15.2746	20.7995	14.2996
728	18.1995	12.0247	12.3497	11.6997	14.2996	11.6997	12.9997	14.9496	20.1495	14.2996
729	18.5245	12.0247	12.9997	11.6997	14.2996	11.6997	13.3247	15.2746	20.4745	14.2996
730	18.1995	11.6997	12.6747	11.6997	13.9747	11.6997	12.9997	15.2746	20.1495	14.6246
731	18.5245	11.6997	12.6747	11.6997	13.6497	11.6997	12.6747	15.2746	20.1495	14.2996
732	18.1995	11.6997	12.9997	11.6997	13.9747	11.3747	12.9997	15.2746	20.1495	14.2996
733	18.5245	12.0247	12.6747	11.6997	13.3247	11.6997	13.6497	15.2746	20.1495	14.2996
734	18.1995	11.6997	12.6747	11.6997	13.9747	11.3747	12.9997	15.2746	20.1495	14.2996
735	18.5245	12.0247	12.9997	11.6997	13.9747	11.6997	12.6747	15.5996	20.4745	14.2996
736	18.5245	12.0247	12.9997	11.6997	13.9747	11.6997	12.9997	15.2746	20.1495	14.2996
737	18.5245	12.0247	13.3247	11.6997	13.9747	11.6997	12.6747	14.9496	20.4745	14.2996
738	18.1995	11.6997	12.6747	11.6997	14.2996	11.3747	13.3247	15.2746	20.1495	14.6246
739	18.8495	12.0247	12.6747	11.6997	13.9747	11.6997	12.6747	15.5996	19.8245	14.2996
740	18.5245	11.6997	12.6747	11.6997	13.9747	11.6997	12.9997	15.2746	20.1495	14.6246
741	18.5245	12.0247	12.3497	11.6997	13.9747	11.6997	13.3247	15.2746	20.1495	14.2996
742	18.1995	12.0247	12.3497	11.6997	14.2996	11.6997	13.3247	15.2746	19.8245	14.2996
743	18.8495	12.0247	12.3497	11.3747	13.9747	11.3747	12.9997	15.2746	20.1495	14.6246
744	18.5245	12.0247	12.6747	11.3747	13.9747	11.6997	12.9997	15.2746	20.1495	14.6246
745	18.5245	12.0247	12.6747	11.6997	13.3247	11.3747	13.6497	15.2746	20.1495	14.2996
746	18.8495	12.0247	12.6747	11.3747	14.6246	11.6997	12.9997	15.5996	19.8245	14.2996
747	18.1995	12.0247	12.9997	11.3747	14.6246	11.6997	12.9997	15.5996	20.1495	14.2996
748	18.5245	11.6997	12.6747	11.3747	14.2996	11.6997	12.9997	15.2746	19.8245	14.2996
749	18.5245	12.0247	12.9997	11.3747	13.6497	11.6997	12.9997	15.2746	19.8245	14.6246
750	18.5245	11.6997	12.3497	11.6997	14.2996	11.6997	12.6747	15.2746	20.1495	14.2996
751	18.5245	11.6997	12.6747	11.3747	14.2996	11.6997	13.6497	15.5996	20.1495	14.6246
752	18.1995	11.6997	12.3497	11.6997	13.9747	11.6997	13.3247	14.9496	20.1495	14.2996
753	18.8495	11.3747	12.6747	12.0247	14.2996	11.6997	13.6497	15.2746	20.1495	14.6246
754	18.1995	12.0247	12.9997	11.6997	13.9747	11.6997	12.6747	15.5996	20.1495	14.2996
755	18.5245	12.0247	12.3497	11.6997	14.6246	11.6997	12.6747	14.9496	20.1495	14.6246
756	18.5245	11.6997	12.3497	12.0247	14.2996	11.6997	12.9997	15.2746	20.1495	14.6246
757	19.1745	11.6997	12.6747	11.3747	13.9747	11.6997	13.3247	15.2746	19.8245	14.6246
758	18.8495	12.0247	12.6747	11.3747	14.2996	11.6997	12.9997	15.2746	20.1495	14.2996
759	18.5245	12.0247	12.3497	11.6997	13.9747	11.6997	12.9997	15.2746	20.1495	14.6246
760	18.5245	12.0247	12.6747	11.6997	13.9747	11.6997	12.6747	15.2746	20.1495	14.2996
761	18.1995	12.0247	12.6747	11.3747	13.9747	11.6997	12.9997	15.2746	20.4745	14.6246
762	18.1995	11.6997	12.9997	11.3747	13.6497	11.6997	12.9997	15.2746	20.1495	14.2996
763	18.8495	11.6997	12.6747	11.6997	14.2996	11.6997	12.9997	15.5996	20.1495	14.2996
764	18.5245	11.6997	12.3497	11.3747	14.2996	11.6997	12.6747	15.2746	20.1495	14.2996
765	18.5245	11.6997	12.9997	12.0247	14.2996	11.6997	13.6497	15.2746	20.1495	14.2996
766	18.1995	11.6997	12.6747	12.0247	14.2996	11.6997	13.6497	15.2746	20.1495	14.2996
767	18.5245	12.0247	12.3497	11.6997	13.9747	11.6997	12.9997	15.2746	20.1495	14.2996
768	18.5245	12.0247	12.9997	11.6997	13.9747	11.6997	12.6747	15.2746	20.1495	14.2996
769	18.5245	11.6997	12.3497	11.6997	13.6497	11.6997	12.6747	15.2746	20.1495	14.2996
770	18.5245	11.6997	12.9997	12.0247	13.9747	11.6997	13.3247	15.5996	20.1495	14.6246
771	18.8495	11.6997	12.3497	12.0247	13.9747	11.6997	12.9997	15.2746	20.1495	14.6246
772	18.1995	11.6997	12.6747	12.0247	13.9747	11.6997	12.6747	15.5996	19.8245	14.2996
773	18.8495	11.6997	12.6747	12.0247	14.2996	11.6997	12.9997	14.9496	20.1495	14.2996
774	18.5245	12.0247	13.3247	12.0247	14.2996	11.3747	12.6747	14.9496	20.1495	14.6246
775	18.5245	12.0247	12.6747	11.3747	14.2996	11.6997	13.3247	15.2746	20.1495	14.2996
776	18.5245	11.3747	12.3497	11.6997	13.6497	11.6997	13.3247	15.2746	20.1495	14.2996
777	18.5245	11.6997	12.6747	11.6997	13.9747	11.6997	12.9997	15.2746	20.1495	14.6246
778	18.5245	12.0247	12.6747	11.6997	14.6246	11.6997	12.9997	15.5996	20.1495	14.2996
779	19.4995	11.6997	12.6747	11.6997	13.6497	11.6997	13.3247	15.2746	19.8245	14.2996
780	18.8495	11.6997	12.6747	11.6997	14.2996	11.6997	12.6747	15.2746	20.1495	14.2996
781	18.5245	12.0247	12.6747	11.6997	13.9747	11.6997	12.6747	15.2746	20.1495	14.6246
782	18.8495	11.6997	12.6747	11.6997	13.9747	11.6997	13.3247	15.5996	20.1495	14.2996
783	18.5245	11.3747	12.6747	11.6997	14.2996	11.6997	12.9997	15.2746	20.1495	14.6246
784	18.5245	11.6997	12.6747	11.6997	14.2996	11.3747	12.6747	15.5996	20.4745	14.6246
785	18.1995	11.6997	12.6747	11.6997	13.9747	11.6997	12.6747	15.2746	20.1495	14.2996
786	18.8495	11.6997	12.6747	11.6997	14.2996	11.3747	13.3247	15.5996	19.8245	14.2996
787	18.8495	11.6997	12.6747	11.6997	14.2996	11.6997	13.3247	15.2746	20.1495	14.6246
788	18.8495	11.6997	12.6747	11.6997	13.9747	11.6997	13.9747	14.9496	20.1495	14.2996
789	18.5245	12.0247	12.9997	11.6997	13.9747	11.6997	12.9997	15.5996	20.4745	14.2996
790	18.5245	11.6997	12.3497	11.6997	13.9747	11.6997	12.9997	14.9496	20.4745	14.2996
791	18.5245	11.6997	12.6747	11.6997	13.9747	11.6997	13.3247	15.5996	20.1495	14.2996
792	18.5245	12.0247	12.9997	11.6997	13.6497	11.6997	13.3247	15.2746	20.1495	14.2996
793	18.5245	12.0247	12.9997	11.6997	13.6497	11.3747	12.9997	15.2746	20.1495	14.6246
794	18.5245	12.0247	12.6747	11.6997	13.6497	11.6997	13.3247	15.5996	20.4745	14.6246
795	18.5245	12.0247	13.3247	11.3747	13.9747	11.6997	12.9997	15.5996	20.1495	14.2996
796	18.8495	11.6997	12.9997	11.6997	13.9747	11.3747	13.3247	15.5996	20.1495	14.2996
797	18.8495	12.0247	12.3497	11.3747	13.9747	11.6997	12.9997	15.2746	20.1495	14.6246
798	18.5245	12.0247	12.9997	11.3747	14.2996	11.6997	13.3247	15.2746	20.4745	14.6246
799	18.8495	12.0247	12.6747	11.3747	14.6246	11.6997	12.6747	14.9496	20.4745	14.9496
800	18.5245	12.0247	12.6747	11.3747	13.6497	11.3747	12.9997	14.9496	19.8245	14.6246
801	18.5245	12.0247	12.9997	11.3747	14.2996	11.6997	12.6747	15.2746	20.1495	14.2996
802	18.5245	12.0247	13.3247	11.3747	14.2996	11.6997	12.9997	15.2746	20.1495	14.2996
803	18.5245	12.0247	12.9997	11.3747	13.6497	11.6997	12.6747	15.2746	19.8245	14.6246
804	18.5245	12.0247	12.9997	11.6997	14.2996	11.6997	12.9997	15.5996	20.1495	14.6246
805	18.5245	12.0247	12.9997	11.3747	13.6497	11.6997	13.3247	15.2746	19.8245	14.6246
806	18.5245	12.0247	12.6747	11.0497	14.2996	11.6997	13.6497	15.5996	20.1495	14.2996
807	18.5245	12.0247	12.6747	11.6997	13.3247	11.6997	13.6497	15.5996	20.1495	14.6246
808	18.5245	12.0247	12.9997	11.3747	13.9747	11.6997	13.3247	15.5996	20.1495	14.2996
809	18.5245	11.6997	12.3497	11.3747	14.2996	11.6997	12.9997	15.2746	20.1495	14.6246
810	18.5245	11.6997	12.3497	11.6997	14.2996	11.6997	12.9997	15.2746	19.8245	14.6246
811	18.5245	11.6997	12.3497	11.3747	14.2996	11.6997	13.9747	15.2746	20.1495	14.2996
812	18.5245	12.0247	12.3497	11.0497	14.2996	11.6997	13.6497	15.2746	20.1495	14.6246
813	18.5245	12.0247	12.6747	11.0497	13.9747	11.6997	12.6747	15.2746	20.4745	14.2996
814	18.5245	12.0247	12.6747	11.3747	13.9747	11.3747	13.3247	15.2746	20.1495	14.6246
815	18.5245	12.0247	12.9997	11.3747	13.6497	12.0247	12.9997	15.2746	20.1495	14.6246
816	19.1745	11.3747	12.6747	11.0497	14.2996	11.6997	13.3247	15.2746	20.1495	14.2996
817	18.5245	11.6997	12.6747	11.3747	13.9747	11.6997	12.6747	15.5996	20.1495	14.2996
818	18.5245	11.6997	12.9997	11.3747	14.2996	11.3747	12.6747	15.5996	20.1495	14.2996
819	18.5245	12.0247	12.9997	11.3747	14.2996	11.6997	12.6747	15.2746	20.1495	14.2996
820	18.5245	11.6997	12.9997	11.6997	13.9747	11.6997	13.3247	14.9496	20.1495	14.2996
821	18.1995	12.0247	12.6747	11.6997	13.9747	11.6997	12.9997	15.2746	20.7995	14.2996
822	18.5245	11.6997	12.3497	11.3747	14.2996	11.6997	13.6497	15.2746	19.8245	14.6246
823	18.5245	11.6997	12.6747	11.3747	13.9747	11.3747	13.6497	15.2746	20.1495	14.6246
824	18.5245	11.6997	12.6747	11.6997	13.6497	11.3747	12.3497	15.5996	20.1495	14.6246
825	18.5245	12.0247	12.6747	11.3747	13.6497	11.6997	12.6747	15.2746	20.4745	14.2996
826	18.5245	11.3747	12.6747	11.6997	13.6497	11.6997	12.9997	15.2746	20.1495	14.2996
827	18.5245	11.6997	12.6747	11.6997	13.9747	11.6997	12.9997	15.5996	19.8245	14.2996
828	18.5245	11.6997	12.6747	11.3747	13.9747	11.6997	12.6747	15.2746	20.4745	14.6246
829	18.1995	11.6997	12.9997	11.3747	14.6246	11.6997	12.9997	15.2746	20.4745	14.6246
830	18.5245	11.6997	12.6747	11.3747	14.6246	11.6997	12.9997	15.2746	19.8245	14.6246
831	18.5245	11.6997	12.6747	11.3747	14.6246	11.6997	12.6747	15.5996	20.1495	14.6246
832	18.5245	11.6997	12.9997	11.3747	14.9496	11.6997	12.6747	15.2746	20.1495	14.2996
833	18.5245	11.6997	12.6747	11.3747	14.2996	11.6997	12.9997	15.5996	20.1495	14.2996
834	18.1995	12.3497	12.6747	11.3747	14.2996	11.6997	13.6497	15.2746	20.1495	14.2996
835	18.5245	11.6997	12.6747	11.3747	14.6246	11.6997	12.6747	15.5996	20.1495	14.6246
836	18.5245	11.6997	12.3497	11.3747	13.9747	11.6997	13.6497	15.5996	20.1495	14.6246
837	18.5245	11.6997	12.9997	11.3747	14.6246	11.6997	12.6747	15.5996	19.8245	14.2996
838	18.5245	11.6997	12.6747	11.3747	13.9747	11.6997	13.3247	15.2746	20.1495	13.9747
839	18.1995	11.6997	12.9997	11.3747	13.9747	11.6997	13.3247	15.2746	19.8245	14.6246
840	18.5245	11.6997	13.3247	11.3747	14.2996	11.6997	13.6497	15.2746	20.4745	14.6246
841	18.5245	11.6997	12.9997	11.3747	14.2996	11.6997	12.9997	15.5996	20.1495	14.6246
842	18.5245	11.6997	12.6747	11.3747	14.2996	11.6997	12.9997	15.5996	20.1495	14.2996
843	18.1995	12.0247	12.9997	11.3747	14.6246	11.6997	12.3497	15.2746	19.8245	14.2996
844	18.1995	11.6997	12.9997	11.3747	14.9496	11.6997	13.6497	15.2746	20.1495	14.2996
845	18.1995	11.6997	12.9997	11.6997	14.6246	11.6997	12.9997	15.5996	20.1495	14.2996
846	18.5245	12.0247	12.6747	11.3747	14.2996	11.6997	12.6747	15.2746	20.1495	14.2996
847	18.5245	12.0247	12.3497	11.3747	14.6246	11.6997	12.9997	15.2746	20.1495	14.2996
848	18.1995	11.6997	12.6747	11.3747	13.9747	11.6997	12.6747	15.2746	19.8245	14.2996
849	18.5245	11.6997	12.6747	11.3747	14.2996	11.6997	12.6747	15.2746	19.8245	14.6246
850	18.5245	11.6997	12.6747	11.3747	14.2996	11.6997	13.6497	15.2746	20.1495	14.6246
851	18.1995	12.0247	12.6747	11.3747	13.9747	11.6997	12.6747	14.9496	20.1495	14.6246
852	18.1995	11.6997	12.3497	11.3747	13.9747	11.6997	12.9997	15.5996	20.1495	14.2996
853	18.1995	11.6997	12.9997	11.6997	14.2996	11.6997	13.3247	15.2746	20.1495	14.6246
854	18.5245	11.6997	12.6747	12.0247	14.2996	11.6997	13.3247	15.5996	20.1495	14.2996
855	18.1995	12.0247	12.9997	12.0247	14.2996	12.0247	13.6497	15.2746	20.4745	14.6246
856	18.1995	11.6997	12.6747	11.6997	13.9747	11.6997	12.9997	15.2746	20.1495	14.2996
857	18.1995	12.0247	12.9997	11.6997	13.9747	11.6997	13.3247	15.5996	20.1495	14.2996
858	18.1995	11.6997	12.6747	11.6997	13.9747	11.6997	12.6747	15.5996	20.1495	14.2996
859	18.1995	11.6997	12.6747	11.6997	14.2996	11.6997	13.3247	15.2746	20.4745	14.6246
860	18.1995	11.6997	12.6747	11.6997	14.2996	12.0247	12.6747	15.5996	20.1495	14.2996
861	18.1995	11.6997	12.9997	11.6997	14.2996	11.6997	12.9997	15.2746	20.1495	14.2996
862	18.1995	11.6997	12.9997	11.6997	14.2996	11.6997	12.9997	15.2746	20.1495	14.2996
863	18.1995	11.6997	12.6747	11.6997	14.2996	11.6997	13.3247	15.5996	20.1495	14.6246
864	18.1995	11.6997	12.3497	11.3747	13.9747	11.6997	12.9997	15.5996	20.1495	14.2996
865	18.1995	11.6997	12.6747	11.6997	13.9747	12.0247	12.9997	15.5996	20.4745	13.9747
866	18.1995	11.6997	12.9997	11.3747	13.9747	11.6997	12.9997	15.5996	20.1495	13.9747
867	18.1995	12.0247	12.6747	11.6997	14.2996	11.6997	12.9997	15.5996	20.1495	14.2996
868	18.1995	12.0247	12.9997	11.3747	14.6246	11.6997	12.6747	15.5996	20.1495	14.2996
869	18.1995	11.3747	12.6747	11.6997	13.9747	11.6997	12.9997	15.5996	20.1495	14.2996
870	18.5245	12.0247	12.6747	11.6997	14.6246	11.6997	12.9997	15.5996	19.8245	13.9747
871	18.1995	11.6997	12.9997	11.3747	14.2996	11.6997	12.3497	15.5996	20.1495	14.2996
872	18.1995	11.3747	12.6747	11.3747	14.2996	11.6997	12.9997	15.5996	20.1495	14.2996
873	18.5245	11.6997	12.6747	11.6997	14.2996	11.6997	13.3247	15.5996	19.8245	14.2996
874	18.1995	11.6997	12.6747	11.6997	14.2996	11.6997	12.6747	15.2746	20.1495	14.6246
875	18.5245	11.6997	12.9997	11.6997	14.2996	11.6997	13.3247	15.2746	20.1495	14.2996
876	18.1995	12.0247	12.6747	12.0247	14.2996	11.6997	13.3247	15.2746	20.1495	14.2996
877	18.1995	11.6997	12.6747	11.3747	14.2996	11.6997	13.3247	15.2746	19.8245	14.2996
878	18.5245	11.6997	12.6747	11.3747	14.6246	12.0247	12.6747	15.5996	19.8245	14.2996
879	18.1995	11.6997	12.9997	12.0247	13.9747	11.6997	12.9997	15.2746	20.4745	14.2996
880	18.5245	11.3747	12.9997	11.6997	13.3247	11.6997	12.6747	15.2746	20.1495	14.6246
881	18.5245	11.6997	12.9997	12.0247	14.6246	12.0247	12.9997	15.5996	20.4745	14.2996
882	18.5245	11.6997	12.6747	11.6997	13.9747	11.6997	13.3247	15.2746	20.1495	14.2996
883	18.5245	11.6997	12.9997	12.0247	14.6246	11.6997	12.9997	15.5996	19.8245	14.6246
884	18.1995	11.6997	12.6747	11.6997	13.9747	11.6997	12.9997	15.2746	20.1495	14.2996
885	18.5245	12.0247	12.6747	11.6997	14.2996	11.6997	13.3247	15.5996	20.1495	14.6246
886	18.1995	11.6997	12.6747	12.0247	14.2996	11.6997	12.9997	15.5996	20.1495	14.2996
887	18.1995	11.6997	12.9997	11.3747	14.2996	11.6997	13.3247	15.5996	20.1495	14.2996
888	18.5245	11.6997	12.9997	11.6997	14.2996	11.3747	12.9997	15.5996	20.1495	14.2996
889	18.1995	11.6997	12.3497	11.6997	14.2996	11.6997	12.6747	15.5996	20.1495	14.2996
890	18.5245	11.6997	12.6747	11.6997	14.2996	11.6997	12.9997	15.5996	20.1495	14.2996
891	18.8495	11.6997	12.9997	11.3747	14.6246	11.6997	12.9997	15.2746	20.1495	14.2996
892	18.8495	11.6997	12.9997	11.3747	14.2996	11.6997	13.3247	15.2746	20.1495	14.2996
893	18.5245	11.6997	12.3497	11.6997	14.6246	11.6997	12.6747	15.2746	20.1495	14.6246
894	18.1995	11.6997	12.0247	11.3747	14.2996	11.6997	12.9997	15.5996	20.1495	14.2996
895	18.5245	11.6997	12.9997	11.3747	14.9496	11.3747	12.9997	15.2746	20.1495	14.2996
896	18.5245	11.3747	12.9997	11.3747	14.2996	11.6997	12.3497	15.2746	20.1495	14.6246
897	18.8495	11.6997	12.3497	11.6997	14.6246	11.6997	12.9997	15.2746	19.8245	14.2996
898	18.5245	11.6997	12.3497	11.3747	13.9747	11.6997	12.9997	15.5996	19.8245	14.2996
899	18.8495	11.6997	12.6747	11.6997	14.2996	11.6997	13.3247	15.2746	20.1495	14.2996
900	18.8495	11.6997	12.6747	11.3747	14.2996	11.6997	12.6747	15.2746	20.1495	14.2996
901	18.5245	11.6997	12.3497	11.3747	13.9747	11.6997	13.6497	15.5996	20.4745	13.9747
902	18.8495	11.6997	12.3497	11.6997	14.6246	11.6997	12.6747	15.2746	20.1495	14.2996
903	18.8495	11.6997	12.6747	11.6997	14.6246	11.6997	13.6497	15.2746	20.1495	14.2996
904	18.5245	11.6997	12.6747	11.3747	13.6497	11.6997	12.9997	15.5996	20.1495	14.2996
905	18.1995	11.6997	12.6747	11.6997	14.2996	11.6997	12.6747	15.5996	20.4745	14.2996
906	18.5245	11.6997	12.3497	11.6997	14.2996	11.6997	12.9997	15.2746	20.1495	14.2996
907	18.5245	12.0247	12.6747	11.3747	14.2996	11.6997	12.6747	15.5996	20.1495	14.2996
908	18.5245	11.6997	12.6747	11.3747	14.9496	11.6997	12.6747	15.5996	20.1495	14.2996
909	18.8495	11.6997	12.3497	11.3747	13.9747	11.6997	12.6747	15.2746	19.8245	14.2996
910	18.5245	11.6997	12.3497	11.3747	14.6246	11.6997	12.6747	15.2746	20.4745	14.2996
911	18.5245	11.6997	12.6747	11.3747	14.2996	11.6997	13.3247	15.2746	20.1495	14.2996
912	18.5245	12.0247	12.3497	11.3747	14.6246	12.0247	12.6747	15.2746	20.1495	14.2996
913	18.5245	11.6997	12.9997	11.3747	14.6246	11.6997	12.6747	15.5996	20.1495	14.2996
914	18.8495	11.3747	12.3497	11.3747	14.6246	11.6997	12.6747	15.2746	20.1495	14.2996
915	18.8495	11.6997	12.0247	11.3747	14.6246	11.6997	12.9997	15.5996	20.1495	14.2996
916	18.8495	12.0247	12.6747	11.6997	14.2996	11.6997	12.9997	15.2746	20.1495	14.2996
917	18.8495	11.6997	12.3497	11.6997	14.6246	12.0247	13.3247	15.5996	20.4745	14.2996
918	18.5245	12.0247	12.3497	12.0247	13.9747	11.6997	13.3247	15.2746	20.1495	14.2996
919	18.8495	12.3497	12.3497	11.6997	13.3247	11.6997	12.6747	15.2746	20.1495	13.9747
920	18.8495	11.6997	12.3497	12.0247	14.2996	11.6997	12.6747	15.5996	20.1495	14.2996
921	18.5245	11.3747	12.3497	11.6997	13.9747	11.6997	12.9997	15.5996	20.1495	14.2996
922	18.5245	12.0247	12.3497	11.6997	14.2996	11.6997	12.9997	15.2746	20.1495	14.2996
923	18.8495	12.0247	12.6747	11.6997	14.2996	11.6997	13.6497	15.2746	19.8245	14.2996
924	18.5245	11.6997	12.6747	11.6997	13.9747	11.6997	12.9997	15.2746	20.4745	14.2996
925	18.8495	11.6997	12.6747	11.6997	14.2996	11.6997	13.3247	15.5996	20.1495	14.2996
926	18.5245	11.6997	12.3497	11.6997	14.2996	11.6997	12.3497	15.2746	20.1495	14.2996
927	18.5245	12.0247	12.3497	11.6997	14.6246	11.6997	12.9997	15.2746	19.8245	14.2996
928	18.8495	11.6997	12.6747	11.6997	14.6246	11.6997	13.3247	14.9496	20.4745	14.6246
929	18.8495	12.0247	12.0247	11.6997	14.6246	11.6997	12.9997	15.2746	20.4745	14.6246
930	18.8495	12.0247	12.0247	11.3747	14.2996	11.6997	13.3247	15.5996	19.8245	14.2996
931	18.1995	12.0247	12.3497	11.6997	13.9747	11.6997	13.3247	15.2746	20.1495	14.2996
932	18.8495	12.0247	12.6747	11.6997	14.6246	11.6997	13.3247	15.5996	20.1495	14.2996
933	18.8495	12.0247	12.3497	11.6997	14.2996	11.6997	13.3247	15.5996	20.1495	14.2996
934	18.8495	12.0247	12.3497	11.6997	14.2996	11.6997	13.3247	15.5996	20.4745	14.2996
935	18.5245	12.0247	12.6747	11.6997	14.9496	11.6997	12.9997	15.5996	20.1495	14.2996
936	18.8495	12.0247	12.3497	11.6997	14.9496	11.6997	13.3247	15.2746	20.1495	14.6246
937	18.8495	12.0247	12.9997	11.3747	14.6246	11.6997	12.6747	15.2746	20.4745	14.2996
938	18.8495	12.3497	12.6747	11.6997	14.6246	11.6997	13.3247	15.5996	20.4745	14.6246
939	18.5245	12.0247	12.6747	11.6997	14.9496	11.6997	13.3247	15.2746	20.4745	14.2996
940	18.8495	11.6997	12.6747	11.3747	14.9496	11.6997	12.9997	15.2746	20.1495	14.6246
941	18.8495	12.0247	12.9997	11.6997	14.2996	11.6997	12.9997	15.5996	20.1495	14.6246
942	18.5245	12.0247	12.6747	11.3747	14.6246	11.6997	12.9997	15.5996	20.1495	14.2996
943	18.5245	11.6997	12.6747	11.3747	14.6246	11.6997	12.9997	15.2746	20.1495	14.2996
944	18.5245	11.6997	12.3497	11.6997	13.6497	12.0247	13.3247	15.5996	20.1495	14.6246
945	18.8495	12.0247	12.9997	11.6997	14.9496	11.6997	13.3247	15.2746	20.1495	14.2996
946	18.8495	11.6997	12.6747	11.6997	14.2996	11.6997	13.3247	14.9496	20.1495	14.2996
947	18.5245	12.0247	12.3497	11.6997	14.9496	12.0247	12.9997	15.5996	19.8245	14.2996
948	18.8495	12.3497	12.3497	11.3747	14.6246	11.6997	12.9997	15.5996	20.4745	14.2996
949	18.5245	11.6997	12.6747	11.3747	14.9496	12.0247	13.3247	15.2746	20.1495	14.2996
950	18.5245	12.0247	12.3497	11.6997	15.2746	11.6997	12.9997	15.2746	20.1495	14.2996
951	18.8495	12.0247	12.9997	11.3747	14.6246	11.6997	12.9997	15.2746	20.1495	14.2996
952	18.8495	11.6997	12.6747	11.3747	14.6246	11.6997	13.3247	15.2746	20.4745	14.6246
953	18.8495	11.6997	12.6747	11.3747	14.6246	11.6997	12.9997	14.9496	19.8245	14.6246
954	18.8495	11.6997	12.6747	11.0497	15.5996	11.6997	13.3247	15.5996	20.1495	14.6246
955	18.8495	12.0247	12.3497	11.0497	14.6246	11.6997	12.9997	15.2746	20.4745	14.2996
956	19.1745	11.6997	12.3497	11.0497	14.9496	12.0247	12.9997	15.5996	19.8245	14.2996
957	18.8495	11.6997	12.9997	11.3747	14.6246	11.6997	12.9997	14.9496	20.1495	14.2996
958	18.8495	11.6997	12.9997	11.3747	14.6246	11.6997	12.9997	14.9496	19.8245	14.2996
959	18.5245	11.6997	12.9997	11.0497	13.9747	11.6997	12.9997	14.9496	20.1495	14.6246
960	18.8495	11.6997	12.6747	11.3747	14.6246	11.6997	12.9997	14.9496	19.8245	14.2996
961	18.8495	11.6997	12.6747	11.3747	14.2996	11.3747	13.9747	14.9496	19.8245	14.2996
962	19.1745	11.6997	12.9997	11.0497	14.2996	11.6997	12.9997	14.9496	19.8245	14.2996
963	18.5245	12.0247	12.6747	11.3747	14.2996	11.6997	12.9997	15.2746	19.8245	14.2996
964	18.8495	11.6997	12.9997	11.3747	14.9496	12.0247	12.9997	15.2746	20.1495	14.2996
965	19.1745	11.6997	12.6747	11.0497	14.6246	11.6997	13.6497	15.2746	19.8245	14.6246
966	19.1745	11.6997	12.0247	11.3747	14.9496	11.6997	12.9997	15.5996	20.1495	14.2996
967	18.8495	11.6997	13.3247	11.3747	14.6246	11.6997	13.3247	15.5996	20.1495	14.2996
968	18.1995	12.3497	13.3247	11.3747	15.5996	12.0247	12.6747	14.9496	20.1495	14.2996
969	17.8746	11.6997	12.3497	11.6997	14.9496	11.6997	12.9997	15.5996	20.1495	14.2996
970	17.8746	12.3497	12.9997	11.3747	14.9496	11.6997	13.6497	14.9496	20.1495	14.6246
971	18.5245	11.6997	12.9997	11.6997	14.6246	12.0247	12.6747	15.5996	20.1495	14.6246
972	18.1995	11.6997	12.9997	11.6997	14.6246	11.6997	13.3247	15.2746	20.1495	14.6246
973	17.8746	11.6997	12.9997	11.3747	14.6246	11.6997	12.6747	15.5996	19.8245	14.2996
974	19.1745	11.6997	12.9997	11.6997	14.6246	11.6997	13.3247	15.5996	20.7995	14.2996
975	19.1745	11.6997	12.3497	11.6997	14.6246	11.6997	12.6747	15.2746	20.4745	14.2996
976	19.1745	11.6997	12.6747	11.3747	14.6246	11.6997	12.9997	14.9496	19.8245	14.2996
977	19.1745	11.6997	13.3247	11.3747	14.6246	11.6997	12.9997	15.2746	20.1495	14.2996
978	18.5245	11.6997	12.9997	11.3747	14.6246	11.6997	13.6497	15.2746	20.1495	14.2996
979	19.1745	11.6997	12.3497	11.0497	14.2996	11.3747	13.3247	15.2746	20.1495	14.6246
980	18.8495	11.6997	12.9997	11.6997	14.2996	12.0247	12.9997	15.2746	19.8245	14.2996
981	19.1745	11.6997	12.9997	11.3747	14.2996	11.6997	13.3247	15.2746	20.1495	14.6246
982	19.1745	11.6997	12.6747	11.0497	14.2996	12.0247	12.9997	14.9496	19.8245	14.2996
983	18.5245	11.3747	12.6747	11.6997	14.2996	11.6997	12.9997	14.9496	19.8245	14.2996
984	19.1745	11.6997	12.6747	11.0497	14.2996	11.6997	13.3247	15.2746	20.1495	14.2996
985	18.8495	11.6997	12.6747	11.6997	14.6246	11.6997	12.9997	15.2746	19.8245	14.2996
986	18.8495	11.3747	12.6747	11.6997	14.2996	11.6997	13.3247	15.5996	19.8245	14.6246
987	18.1995	11.6997	12.6747	11.3747	14.9496	12.0247	12.6747	14.9496	19.8245	14.2996
988	18.1995	11.3747	12.6747	11.6997	14.6246	11.6997	13.3247	15.2746	19.4995	14.2996
989	19.1745	11.6997	12.6747	11.6997	14.2996	11.6997	12.9997	14.9496	19.8245	14.6246
990	18.5245	11.6997	13.3247	11.6997	14.6246	11.6997	12.6747	15.2746	20.1495	14.2996
991	18.8495	11.6997	12.6747	11.3747	14.2996	11.6997	12.9997	14.9496	19.8245	14.6246
992	18.5245	11.3747	12.3497	11.6997	14.6246	11.3747	12.9997	15.5996	19.8245	14.2996
993	19.1745	11.3747	12.6747	11.6997	14.2996	11.6997	12.9997	15.2746	19.4995	14.2996
994	18.5245	12.0247	12.6747	11.6997	14.2996	11.6997	12.9997	14.9496	19.4995	14.6246
995	18.8495	12.0247	12.6747	11.6997	14.6246	11.6997	12.6747	14.9496	20.1495	14.2996
996	19.1745	11.6997	12.9997	11.6997	14.2996	11.6997	12.9997	15.5996	20.1495	14.2996
997	19.1745	12.0247	12.9997	11.6997	14.6246	11.6997	12.6747	15.2746	19.8245	14.2996
998	18.8495	11.6997	13.3247	11.3747	14.6246	11.6997	12.9997	15.5996	19.8245	14.2996
999	18.8495	11.6997	12.9997	11.3747	14.6246	12.0247	12.9997	15.2746	20.1495	14.2996
1000	18.8495	11.6997	12.6747	11.3747	14.9496	11.6997	13.3247	14.9496	20.1495	14.2996
1001	18.5245	11.6997	12.6747	11.3747	14.2996	12.0247	13.3247	15.2746	20.1495	14.6246
1002	18.5245	11.6997	12.9997	11.0497	14.6246	12.0247	12.3497	14.9496	20.1495	14.2996
1003	18.8495	11.6997	12.6747	11.0497	14.6246	12.0247	13.3247	15.2746	19.8245	14.2996
1004	18.8495	12.0247	12.9997	11.0497	14.6246	11.6997	12.9997	14.9496	20.1495	14.2996
1005	19.1745	12.0247	12.9997	11.3747	13.9747	11.6997	13.3247	15.2746	20.1495	14.2996
1006	18.5245	11.6997	13.3247	11.3747	14.6246	11.6997	12.6747	15.2746	19.4995	14.2996
1007	18.5245	12.0247	12.6747	11.3747	14.6246	11.6997	13.9747	15.2746	20.4745	14.6246
1008	18.5245	12.0247	12.6747	11.3747	15.2746	11.6997	12.6747	15.5996	20.4745	14.2996
1009	18.8495	11.6997	12.3497	11.0497	14.6246	12.0247	13.3247	15.5996	19.8245	14.6246
1010	18.1995	11.6997	12.9997	11.0497	14.2996	12.0247	12.9997	15.5996	20.4745	14.2996
1011	19.1745	11.6997	12.3497	11.0497	14.6246	11.6997	12.9997	15.2746	19.8245	14.2996
1012	18.5245	11.6997	12.3497	11.0497	13.9747	11.6997	12.9997	15.2746	20.1495	14.2996
1013	18.8495	11.6997	12.6747	11.0497	14.6246	11.6997	12.9997	15.2746	20.1495	14.2996
1014	18.8495	12.0247	12.9997	10.7247	14.6246	11.6997	13.3247	15.2746	20.1495	14.6246
1015	18.5245	11.6997	12.6747	11.0497	14.9496	11.3747	12.9997	14.9496	19.4995	14.9496
1016	18.1995	11.6997	12.9997	10.7247	14.2996	11.6997	12.9997	15.2746	19.8245	14.2996
1017	18.5245	11.6997	12.9997	11.0497	14.6246	11.6997	13.6497	14.9496	20.1495	14.6246
1018	18.5245	11.6997	12.9997	11.3747	14.6246	11.6997	12.9997	15.2746	20.1495	14.2996
1019	18.8495	12.0247	12.9997	10.7247	14.6246	11.6997	12.9997	14.9496	20.1495	14.6246
1020	18.1995	12.0247	13.3247	11.0497	14.6246	11.6997	12.9997	15.2746	20.4745	14.2996
1021	18.5245	12.0247	12.9997	11.0497	14.6246	11.6997	12.9997	15.2746	19.8245	14.6246
1022	18.8495	12.0247	13.3247	11.3747	14.9496	11.6997	12.6747	15.2746	20.1495	14.2996
1023	18.8495	11.6997	13.3247	11.0497	14.2996	12.0247	12.9997	15.2746	20.1495	14.2996
1024	18.5245	12.0247	13.3247	11.0497	14.6246	11.6997	12.9997	15.2746	20.4745	14.6246
1025	18.8495	12.0247	12.9997	11.3747	14.2996	11.3747	13.6497	15.2746	19.8245	14.6246
1026	18.5245	11.6997	12.6747	11.0497	13.9747	11.6997	12.9997	15.2746	20.1495	14.6246
1027	18.8495	12.0247	12.3497	11.3747	14.2996	11.6997	12.6747	14.9496	20.1495	14.6246
1028	19.1745	12.0247	12.9997	11.3747	14.6246	11.6997	12.6747	15.2746	19.8245	14.9496
1029	18.5245	12.0247	12.6747	11.3747	14.6246	11.3747	12.9997	14.9496	19.8245	14.2996
1030	19.1745	12.0247	12.6747	11.3747	14.2996	11.6997	13.3247	14.9496	20.1495	14.6246
1031	18.8495	12.0247	13.3247	11.3747	14.6246	11.6997	12.3497	15.2746	20.1495	14.6246
1032	18.5245	11.6997	12.6747	11.3747	14.6246	11.6997	12.6747	14.9496	20.4745	14.2996
1033	18.5245	12.0247	13.3247	11.3747	14.9496	11.6997	12.6747	15.2746	20.1495	14.2996
1034	18.5245	12.0247	12.9997	11.0497	14.6246	11.6997	12.9997	15.2746	20.1495	14.6246
1035	18.1995	12.0247	12.9997	11.3747	14.2996	11.6997	12.6747	15.2746	20.1495	14.2996
1036	18.8495	12.0247	12.9997	11.3747	14.6246	11.6997	13.3247	15.2746	19.8245	14.6246
1037	18.5245	11.6997	13.3247	11.0497	14.2996	11.3747	12.9997	14.9496	19.4995	14.2996
1038	18.5245	12.0247	13.3247	11.3747	14.2996	11.6997	12.6747	14.9496	20.1495	14.2996
1039	18.8495	11.6997	12.9997	11.0497	14.6246	11.3747	12.9997	15.2746	20.1495	14.2996
1040	18.5245	11.6997	12.9997	11.3747	14.6246	11.6997	13.3247	15.2746	20.1495	14.2996
1041	18.8495	12.0247	12.9997	11.3747	14.6246	11.3747	12.3497	15.5996	20.1495	14.6246
1042	19.1745	11.6997	12.9997	11.6997	14.9496	11.6997	13.3247	15.2746	20.1495	14.2996
1043	18.1995	12.0247	12.6747	11.0497	14.6246	11.3747	12.9997	14.9496	19.8245	14.2996
1044	18.8495	12.0247	12.6747	11.3747	14.6246	11.6997	13.3247	15.2746	20.1495	14.2996
1045	18.8495	11.6997	12.3497	11.3747	14.2996	11.6997	12.9997	15.2746	20.4745	14.2996
1046	18.1995	12.0247	12.9997	11.3747	14.6246	11.6997	12.9997	15.2746	19.8245	14.2996
1047	18.8495	12.0247	12.9997	11.6997	14.2996	11.6997	13.3247	15.5996	20.1495	14.2996
1048	18.1995	11.6997	12.3497	11.3747	14.2996	11.6997	12.9997	15.2746	20.4745	14.2996
1049	18.5245	11.6997	12.9997	11.6997	14.2996	11.6997	12.9997	15.2746	19.4995	14.2996
1050	18.5245	12.0247	12.9997	11.0497	14.2996	11.3747	12.6747	15.2746	19.8245	14.2996
1051	18.8495	12.0247	13.3247	11.3747	14.6246	11.6997	12.9997	15.2746	20.1495	14.2996
1052	18.5245	12.0247	12.9997	11.6997	13.9747	11.3747	12.9997	15.5996	19.8245	14.2996
1053	18.8495	11.6997	12.6747	11.6997	14.6246	11.6997	12.9997	15.2746	20.1495	14.6246
1054	18.8495	12.3497	13.3247	11.3747	14.2996	11.3747	12.9997	15.2746	20.1495	14.2996
1055	18.5245	11.6997	12.6747	11.3747	14.2996	11.6997	12.9997	15.2746	20.1495	14.2996
1056	19.1745	11.6997	13.3247	11.6997	14.6246	11.6997	13.3247	14.9496	20.1495	14.2996
1057	18.8495	11.6997	12.6747	11.3747	14.2996	11.6997	12.9997	15.2746	20.1495	14.2996
1058	18.5245	12.0247	12.9997	11.3747	13.9747	11.6997	12.6747	15.2746	20.1495	13.9747
1059	18.1995	12.0247	13.3247	11.3747	14.2996	11.3747	12.3497	15.2746	19.8245	14.6246
1060	18.5245	12.0247	12.6747	11.3747	14.9496	11.3747	13.3247	15.2746	20.1495	14.2996
1061	18.5245	12.0247	12.9997	11.6997	14.6246	11.3747	12.3497	15.2746	19.8245	14.2996
1062	18.1995	11.6997	12.9997	12.0247	14.9496	11.6997	12.9997	15.2746	20.4745	14.2996
1063	18.8495	12.0247	12.9997	12.0247	14.6246	11.3747	13.3247	14.9496	20.1495	14.2996
1064	18.5245	12.0247	13.3247	12.0247	14.6246	11.6997	13.6497	15.2746	20.1495	14.6246
1065	18.5245	12.3497	13.3247	11.6997	14.9496	11.3747	12.9997	15.2746	20.1495	14.2996
1066	18.5245	12.0247	12.9997	12.0247	14.2996	11.3747	12.9997	15.2746	20.1495	14.2996
1067	18.8495	12.0247	13.3247	11.6997	14.2996	11.6997	12.3497	14.9496	19.8245	14.2996
1068	18.8495	11.6997	13.3247	12.0247	14.2996	11.6997	12.9997	15.2746	19.8245	14.2996
1069	18.5245	11.6997	12.6747	11.6997	14.2996	11.3747	13.6497	15.2746	20.1495	14.2996
1070	18.8495	11.6997	12.9997	12.0247	14.9496	11.6997	12.9997	15.2746	19.4995	14.2996
1071	18.5245	12.0247	13.3247	12.0247	14.6246	11.3747	12.9997	14.9496	19.8245	14.2996
1072	18.8495	11.6997	13.6497	11.6997	14.9496	11.3747	12.6747	14.9496	19.8245	14.2996
1073	18.5245	11.6997	12.9997	12.0247	14.2996	11.3747	12.9997	15.2746	19.8245	14.2996
1074	18.5245	12.0247	12.9997	12.0247	14.6246	11.6997	13.6497	15.2746	19.8245	14.2996
1075	18.5245	11.6997	13.6497	11.6997	13.9747	11.6997	12.6747	15.2746	19.8245	14.2996
1076	18.5245	11.6997	12.9997	11.6997	14.2996	11.3747	12.9997	15.2746	19.4995	14.2996
1077	18.5245	12.0247	12.9997	12.0247	14.6246	11.6997	12.6747	14.9496	20.1495	14.6246
1078	18.5245	11.6997	13.3247	11.6997	14.2996	11.6997	12.9997	15.2746	20.1495	14.2996
1079	19.1745	12.0247	12.6747	11.6997	14.9496	11.6997	13.3247	15.2746	19.4995	14.6246
1080	18.5245	12.0247	12.9997	12.0247	14.2996	11.3747	13.3247	14.9496	20.1495	14.2996
1081	18.5245	11.6997	12.9997	11.6997	14.2996	11.3747	12.9997	14.9496	19.8245	14.2996
1082	18.8495	12.0247	12.9997	11.6997	14.2996	11.6997	12.6747	14.9496	20.1495	14.6246
1083	18.5245	11.6997	12.9997	11.6997	14.9496	11.6997	12.9997	15.2746	20.1495	14.2996
1084	18.1995	11.6997	12.3497	11.6997	14.6246	11.3747	12.6747	15.2746	19.8245	14.2996
1085	18.5245	12.0247	12.9997	11.6997	14.6246	11.6997	13.3247	15.2746	20.1495	14.2996
1086	18.5245	12.0247	12.9997	11.6997	14.2996	11.3747	12.6747	14.9496	19.8245	14.2996
1087	18.8495	11.6997	13.3247	11.6997	14.6246	11.3747	12.6747	15.2746	19.8245	14.2996
1088	18.8495	11.6997	12.9997	11.6997	14.6246	11.6997	12.9997	14.9496	20.1495	14.2996
1089	18.5245	11.6997	12.6747	11.6997	14.2996	11.3747	12.9997	15.2746	19.8245	14.2996
1090	18.5245	12.0247	12.6747	11.6997	14.2996	11.6997	12.9997	15.2746	19.8245	14.2996
1091	18.8495	11.6997	12.9997	11.6997	14.9496	11.3747	13.3247	15.2746	19.8245	14.2996
1092	18.5245	11.6997	12.6747	11.6997	14.6246	11.3747	12.9997	14.9496	19.4995	14.2996
1093	18.5245	12.0247	12.6747	11.6997	14.6246	11.6997	12.9997	15.2746	19.8245	14.2996
1094	18.8495	12.0247	12.9997	11.6997	14.6246	11.6997	12.6747	14.9496	20.1495	14.2996
1095	18.8495	12.0247	12.9997	11.6997	14.2996	11.6997	12.9997	15.2746	20.1495	14.6246
1096	19.1745	11.6997	12.6747	11.6997	14.2996	11.6997	12.6747	15.2746	19.8245	14.2996
1097	18.5245	11.3747	12.3497	11.6997	14.6246	11.3747	13.3247	15.2746	20.1495	14.2996
1098	18.8495	12.0247	12.9997	11.6997	14.2996	11.3747	12.9997	15.2746	19.8245	13.9747
1099	18.8495	12.0247	12.6747	11.6997	14.9496	11.3747	13.3247	15.2746	19.8245	14.2996
1100	18.8495	11.6997	12.9997	11.6997	14.2996	11.6997	12.9997	15.2746	20.1495	14.2996
1101	18.8495	12.0247	12.6747	11.6997	14.2996	11.3747	12.6747	15.2746	19.8245	14.2996
1102	18.5245	11.3747	12.6747	11.6997	14.2996	11.6997	12.6747	15.2746	19.8245	14.2996
1103	18.8495	12.0247	12.6747	11.6997	14.9496	11.6997	13.3247	15.2746	20.4745	14.2996
1104	18.8495	11.6997	12.6747	11.6997	14.2996	11.6997	13.3247	14.9496	19.4995	14.2996
1105	18.8495	11.6997	12.6747	11.6997	14.6246	11.3747	13.3247	15.2746	20.7995	13.9747
1106	18.5245	11.6997	12.9997	11.6997	14.2996	11.3747	12.9997	14.9496	20.4745	14.2996
1107	18.8495	11.6997	12.6747	11.6997	14.6246	11.6997	13.3247	14.9496	20.4745	13.9747
1108	18.5245	11.6997	12.3497	11.6997	14.6246	11.3747	13.6497	15.2746	20.1495	14.2996
1109	18.8495	11.6997	12.6747	11.6997	14.9496	11.6997	12.9997	14.9496	20.1495	14.2996
1110	18.5245	11.6997	12.3497	11.6997	15.2746	11.6997	12.9997	15.2746	20.1495	13.9747
1111	18.5245	12.0247	12.6747	11.6997	14.6246	11.6997	12.6747	14.9496	20.1495	13.9747
1112	18.5245	11.6997	12.6747	11.6997	14.6246	11.3747	12.9997	14.9496	19.8245	14.2996
1113	18.8495	11.6997	12.0247	11.6997	14.2996	11.6997	13.3247	15.2746	20.4745	14.2996
1114	18.5245	12.0247	12.3497	11.6997	14.2996	11.6997	13.6497	15.2746	20.1495	14.2996
1115	18.8495	12.0247	12.3497	11.6997	14.2996	11.3747	12.9997	15.2746	20.1495	14.2996
1116	18.5245	11.6997	12.3497	12.0247	14.2996	11.3747	13.3247	14.9496	20.1495	14.2996
1117	18.5245	11.6997	12.6747	11.6997	14.2996	11.6997	12.9997	15.2746	19.8245	13.6497
1118	18.5245	11.6997	12.3497	12.0247	13.9747	11.6997	13.3247	15.2746	19.8245	14.2996
1119	18.8495	11.6997	12.6747	11.6997	14.2996	11.3747	12.6747	15.2746	20.4745	14.2996
1120	19.1745	11.6997	13.6497	11.6997	14.9496	11.6997	12.6747	15.2746	20.1495	14.2996
1121	19.1745	11.6997	12.9997	11.6997	14.6246	11.6997	12.6747	14.9496	20.1495	14.2996
1122	18.8495	11.6997	13.3247	12.0247	14.6246	11.6997	12.6747	14.9496	19.4995	13.9747
1123	18.8495	11.6997	12.9997	12.0247	13.9747	11.3747	12.9997	14.9496	19.8245	14.2996
1124	18.8495	11.6997	12.9997	11.6997	14.6246	11.6997	13.6497	14.9496	19.4995	13.9747
1125	18.5245	11.6997	12.9997	11.6997	14.2996	11.6997	12.6747	15.2746	19.8245	14.2996
1126	19.1745	11.6997	12.9997	11.6997	14.6246	11.3747	13.3247	15.2746	19.8245	14.2996
1127	19.1745	11.6997	12.9997	12.0247	14.2996	11.6997	13.6497	15.2746	19.8245	14.2996
1128	18.5245	12.0247	13.3247	11.6997	14.2996	11.6997	12.9997	15.2746	19.8245	14.2996
1129	19.1745	11.6997	12.6747	12.0247	14.2996	11.6997	12.9997	15.2746	19.8245	13.9747
1130	19.1745	11.6997	12.6747	12.0247	14.6246	12.0247	13.3247	15.2746	19.8245	14.2996
1131	18.8495	11.6997	12.6747	12.0247	14.6246	11.3747	12.9997	15.2746	19.8245	13.9747
1132	18.8495	11.6997	12.3497	12.0247	13.9747	11.6997	12.9997	15.2746	20.1495	13.9747
1133	18.8495	12.0247	12.6747	12.0247	14.2996	11.6997	12.9997	15.2746	19.8245	14.2996
1134	19.4995	11.3747	12.6747	12.0247	14.6246	11.6997	12.9997	14.9496	20.1495	14.2996
1135	18.8495	12.0247	12.0247	11.6997	13.9747	11.3747	13.6497	15.2746	19.8245	14.2996
1136	18.8495	12.0247	12.3497	11.6997	14.2996	11.6997	12.9997	15.2746	20.1495	14.2996
1137	19.1745	11.6997	12.3497	12.0247	14.2996	11.3747	12.9997	15.2746	19.8245	13.9747
1138	18.8495	12.0247	12.0247	11.6997	14.6246	11.3747	12.9997	15.2746	19.4995	13.9747
1139	18.8495	12.0247	12.0247	11.6997	14.2996	11.3747	12.9997	14.9496	20.1495	14.2996
1140	19.1745	11.3747	12.0247	12.0247	14.6246	11.6997	12.9997	15.2746	19.8245	13.9747
1141	18.8495	11.6997	12.3497	12.0247	14.6246	11.3747	13.3247	15.2746	19.8245	13.9747
1142	18.8495	12.0247	12.0247	12.0247	14.6246	11.3747	12.9997	15.2746	20.1495	13.6497
1143	19.1745	12.0247	12.3497	12.0247	14.6246	11.6997	12.3497	15.2746	20.1495	14.2996
1144	18.5245	11.6997	12.3497	12.0247	14.6246	11.6997	12.9997	14.9496	20.1495	13.9747
1145	19.1745	11.6997	11.6997	12.0247	14.2996	11.6997	13.6497	15.2746	20.1495	13.9747
1146	18.5245	11.6997	12.0247	11.6997	13.9747	11.3747	12.9997	15.2746	20.1495	13.9747
1147	18.8495	12.0247	12.0247	12.0247	14.6246	11.6997	13.3247	14.9496	19.8245	14.2996
1148	18.8495	11.6997	12.3497	12.0247	13.9747	11.6997	13.6497	15.2746	20.1495	14.2996
1149	18.8495	11.6997	12.0247	11.6997	14.6246	11.6997	13.6497	15.2746	20.1495	13.9747
1150	18.8495	12.0247	12.3497	11.6997	14.6246	11.3747	12.9997	15.2746	19.8245	14.2996
1151	18.8495	11.6997	12.3497	12.0247	14.2996	11.3747	12.9997	15.2746	19.8245	13.9747
1152	18.5245	11.6997	12.3497	11.6997	14.9496	11.3747	12.6747	15.2746	19.8245	13.9747
1153	18.5245	11.6997	12.0247	12.0247	15.2746	11.3747	12.6747	15.2746	20.1495	14.2996
1154	19.4995	11.6997	12.3497	11.6997	14.9496	11.6997	12.6747	15.2746	19.4995	14.2996
1155	18.8495	11.6997	12.3497	11.6997	14.2996	11.6997	12.6747	15.2746	20.1495	14.2996
1156	18.5245	11.6997	12.0247	11.6997	14.6246	11.6997	12.9997	15.2746	20.1495	14.2996
1157	18.8495	11.3747	12.3497	11.6997	14.2996	11.3747	12.9997	15.2746	19.4995	13.9747
1158	18.8495	11.6997	12.3497	11.6997	13.6497	11.3747	12.9997	14.9496	19.8245	13.9747
1159	19.1745	11.6997	12.6747	11.6997	14.2996	11.3747	12.6747	15.2746	20.1495	14.2996
1160	18.5245	11.6997	13.6497	11.6997	14.9496	11.3747	12.9997	15.2746	20.1495	14.2996
1161	19.1745	11.3747	12.9997	11.6997	14.6246	11.6997	13.3247	15.2746	19.8245	13.9747
1162	18.8495	11.6997	12.9997	11.6997	14.9496	11.6997	13.3247	15.2746	20.1495	13.9747
1163	18.8495	11.6997	13.3247	12.0247	14.9496	11.3747	13.6497	15.2746	19.8245	13.9747
1164	18.8495	11.3747	12.6747	11.6997	14.9496	11.6997	12.6747	15.2746	20.1495	13.9747
1165	18.8495	11.3747	12.6747	12.0247	14.6246	11.3747	13.3247	15.2746	20.1495	14.2996
1166	19.1745	11.3747	12.9997	12.0247	14.2996	11.3747	13.6497	14.9496	20.1495	14.2996
1167	18.5245	11.6997	12.3497	11.3747	14.9496	11.3747	12.9997	15.2746	19.8245	13.9747
1168	18.5245	11.6997	12.6747	11.3747	14.6246	11.6997	13.9747	15.2746	20.4745	14.6246
1169	18.8495	11.3747	12.3497	11.6997	14.6246	11.6997	13.3247	15.2746	19.8245	13.9747
1170	18.8495	11.6997	12.6747	11.6997	14.6246	11.6997	13.3247	14.9496	20.1495	13.9747
1171	18.5245	11.6997	12.9997	11.6997	14.6246	11.6997	13.3247	14.9496	20.1495	14.2996
1172	18.8495	11.6997	12.6747	12.0247	14.6246	11.6997	13.3247	15.2746	19.8245	13.9747
1173	18.8495	11.6997	12.3497	11.6997	14.9496	11.3747	12.9997	15.2746	19.8245	14.2996
1174	18.8495	11.6997	12.3497	12.0247	14.6246	11.6997	12.6747	15.2746	19.8245	13.9747
1175	18.5245	11.6997	12.6747	12.0247	14.6246	11.3747	12.9997	15.2746	19.8245	13.9747
1176	18.8495	11.6997	12.9997	11.6997	14.9496	11.3747	13.3247	15.5996	20.1495	14.2996
1177	18.5245	12.0247	12.9997	12.0247	14.6246	11.6997	13.3247	15.2746	19.8245	13.9747
1178	19.1745	11.3747	12.9997	11.6997	14.9496	11.3747	13.3247	15.2746	20.1495	13.9747
1179	18.5245	11.3747	12.9997	12.0247	15.2746	11.3747	13.3247	15.2746	19.8245	14.2996
1180	18.8495	11.6997	12.0247	11.6997	14.6246	11.3747	13.6497	15.2746	20.1495	13.6497
1181	18.8495	12.0247	12.3497	11.6997	14.6246	11.6997	13.3247	15.2746	20.1495	13.9747
1182	18.5245	11.6997	12.3497	11.3747	14.9496	11.3747	13.3247	15.2746	20.1495	13.9747
1183	18.5245	11.6997	12.6747	12.0247	14.9496	11.6997	12.9997	15.2746	20.1495	14.2996
1184	18.8495	11.6997	12.9997	11.3747	14.6246	11.3747	13.9747	15.2746	19.8245	14.2996
1185	19.1745	11.6997	12.6747	11.6997	14.2996	11.6997	12.9997	15.2746	20.1495	13.9747
1186	19.1745	11.3747	12.3497	11.3747	14.6246	11.3747	12.6747	14.9496	19.4995	14.2996
1187	19.4995	11.6997	12.3497	11.6997	14.6246	11.3747	12.6747	15.2746	19.4995	13.9747
1188	18.8495	11.6997	13.3247	11.3747	14.2996	11.6997	12.3497	15.2746	20.1495	14.2996
1189	18.8495	11.3747	12.3497	11.3747	14.6246	11.6997	12.6747	15.2746	20.1495	14.2996
1190	18.8495	11.3747	12.6747	11.3747	14.2996	12.0247	12.6747	15.2746	20.1495	14.2996
1191	18.8495	11.6997	12.9997	11.3747	14.6246	11.6997	12.0247	15.2746	19.8245	14.2996
1192	18.5245	11.3747	12.6747	11.3747	14.6246	11.3747	12.6747	14.9496	20.1495	13.9747
1193	18.8495	11.6997	12.3497	11.3747	14.6246	11.6997	12.3497	14.9496	19.4995	13.9747
1194	18.5245	11.6997	12.6747	11.3747	14.6246	11.3747	12.3497	15.2746	20.1495	13.9747
1195	18.8495	11.6997	12.3497	11.3747	14.2996	11.6997	12.6747	15.2746	19.4995	13.9747
1196	18.5245	12.0247	12.3497	11.3747	14.6246	11.6997	12.3497	15.2746	19.8245	13.9747
1197	19.1745	11.3747	12.6747	11.3747	14.6246	11.3747	12.6747	15.2746	19.8245	14.2996
1198	18.8495	11.6997	12.0247	11.3747	14.6246	11.6997	12.6747	15.2746	19.8245	13.9747
1199	19.1745	11.6997	12.0247	11.3747	14.9496	11.3747	13.3247	15.2746	19.8245	13.9747
1200	19.1745	12.0247	12.6747	11.3747	14.6246	11.6997	12.3497	15.2746	19.4995	14.2996
1201	19.1745	11.6997	12.3497	11.3747	14.6246	11.6997	12.9997	15.2746	19.8245	14.2996
1202	19.1745	11.6997	13.3247	11.6997	14.2996	11.3747	12.6747	15.2746	19.8245	14.2996
1203	19.1745	11.6997	12.6747	11.3747	14.6246	11.6997	12.6747	15.2746	19.4995	13.9747
1204	19.1745	11.6997	12.3497	11.3747	14.2996	11.6997	12.6747	15.2746	19.8245	14.2996
1205	18.5245	11.6997	12.3497	11.3747	14.6246	11.3747	12.3497	15.2746	19.8245	13.9747
1206	19.4995	11.3747	12.3497	11.3747	14.6246	11.6997	12.6747	15.2746	19.8245	13.9747
1207	18.5245	11.3747	12.6747	12.0247	14.6246	11.6997	12.0247	15.2746	19.4995	13.9747
1208	18.8495	11.6997	12.3497	11.3747	14.6246	11.3747	12.3497	15.2746	19.8245	13.9747
1209	18.8495	11.3747	12.3497	11.6997	14.6246	11.6997	12.3497	15.2746	19.8245	13.9747
1210	19.1745	11.6997	12.6747	11.3747	14.6246	11.6997	12.6747	15.2746	20.1495	13.9747
1211	18.8495	11.6997	12.6747	11.3747	14.9496	11.6997	12.6747	15.2746	19.8245	13.9747
1212	18.5245	11.6997	12.6747	11.3747	14.2996	11.6997	12.3497	15.2746	19.8245	13.9747
1213	18.8495	11.6997	12.3497	11.3747	14.6246	12.0247	12.3497	15.2746	19.8245	14.2996
1214	19.1745	11.6997	12.6747	11.3747	14.2996	11.6997	12.9997	14.9496	19.4995	13.9747
1215	18.8495	11.3747	12.6747	11.3747	14.9496	11.6997	12.9997	15.2746	20.1495	13.9747
1216	18.5245	12.0247	12.0247	11.3747	14.9496	11.6997	12.3497	15.2746	20.1495	14.2996
1217	19.1745	11.6997	12.3497	11.3747	14.6246	11.6997	12.6747	15.2746	20.4745	14.2996
1218	19.1745	11.6997	12.3497	11.3747	14.2996	11.6997	13.3247	15.2746	20.1495	13.9747
1219	18.8495	12.0247	12.6747	11.3747	13.9747	11.6997	12.6747	15.2746	20.1495	14.2996
1220	18.8495	12.0247	12.3497	11.0497	14.2996	11.6997	12.6747	15.2746	19.8245	14.2996
1221	18.8495	11.6997	12.3497	11.3747	14.2996	11.6997	12.9997	15.2746	19.4995	13.9747
1222	18.8495	11.3747	12.3497	11.0497	14.2996	11.6997	12.6747	15.2746	19.4995	13.9747
1223	19.1745	12.0247	12.6747	11.6997	14.6246	11.6997	12.6747	15.2746	20.1495	14.2996
1224	18.5245	11.6997	12.3497	11.3747	14.6246	11.3747	13.3247	15.2746	20.1495	14.2996
1225	19.1745	11.3747	12.3497	11.6997	14.2996	12.0247	12.3497	15.2746	20.1495	14.2996
1226	18.5245	12.0247	12.3497	11.3747	14.6246	11.6997	12.6747	15.2746	20.1495	13.9747
1227	19.1745	11.3747	12.6747	11.0497	14.6246	11.6997	12.6747	15.2746	19.8245	13.9747
1228	19.1745	11.6997	12.3497	11.3747	14.6246	11.6997	12.6747	15.2746	19.8245	14.2996
1229	18.5245	11.6997	12.3497	11.6997	14.6246	11.3747	12.9997	15.2746	19.8245	13.9747
1230	19.1745	11.6997	12.3497	11.3747	14.6246	11.6997	13.3247	15.2746	20.4745	14.2996
1231	18.8495	11.3747	12.3497	11.0497	14.6246	11.6997	12.6747	15.2746	19.4995	13.9747
1232	18.8495	12.0247	12.6747	11.3747	14.6246	11.3747	12.3497	15.2746	20.1495	14.2996
1233	18.8495	11.6997	12.3497	11.3747	14.6246	12.0247	12.6747	15.2746	20.1495	13.9747
1234	18.5245	12.0247	12.9997	11.0497	14.9496	11.6997	12.3497	15.2746	19.8245	14.6246
1235	19.1745	11.3747	12.6747	11.3747	15.2746	11.6997	13.9747	15.2746	20.1495	13.6497
1236	19.1745	12.0247	12.9997	11.0497	14.2996	11.6997	12.9997	15.2746	19.8245	14.2996
1237	19.1745	11.3747	12.6747	11.0497	14.9496	11.6997	12.9997	15.2746	19.8245	14.2996
1238	18.8495	11.6997	12.3497	11.0497	14.9496	11.6997	12.6747	15.2746	20.1495	13.9747
1239	18.8495	11.6997	12.3497	11.3747	14.9496	11.6997	12.6747	15.2746	19.8245	14.2996
1240	18.8495	12.0247	12.6747	11.3747	14.6246	11.6997	12.3497	15.2746	19.8245	14.2996
1241	18.8495	11.6997	12.3497	11.0497	14.9496	11.6997	12.9997	15.2746	20.4745	14.2996
1242	19.1745	12.0247	12.3497	11.3747	14.6246	11.6997	12.6747	15.2746	19.8245	13.9747
1243	18.5245	11.6997	12.6747	11.3747	14.6246	11.6997	12.6747	15.2746	19.8245	13.9747
1244	19.1745	12.0247	12.3497	11.6997	14.9496	11.6997	12.6747	15.2746	19.8245	13.9747
1245	18.8495	11.3747	12.3497	11.3747	15.5996	11.3747	12.9997	15.2746	20.1495	13.9747
1246	18.5245	11.6997	12.6747	11.3747	14.6246	11.6997	12.6747	15.2746	19.8245	13.9747
1247	18.5245	11.6997	12.9997	11.3747	14.6246	11.6997	12.9997	15.2746	19.8245	13.9747
1248	19.1745	11.6997	12.9997	11.3747	14.6246	11.3747	12.6747	15.2746	19.8245	13.9747
1249	18.8495	11.6997	12.6747	11.0497	13.9747	11.6997	12.9997	15.2746	19.8245	13.9747
1250	19.1745	11.6997	12.6747	11.3747	14.2996	11.6997	12.9997	15.2746	20.1495	14.2996
1251	18.8495	12.0247	12.3497	11.3747	14.6246	11.6997	13.6497	15.2746	19.8245	14.2996
1252	18.5245	11.3747	12.3497	11.0497	14.6246	11.3747	12.6747	15.2746	19.8245	14.2996
1253	19.4995	12.0247	12.6747	11.3747	14.6246	11.6997	12.3497	15.2746	20.1495	13.9747
1254	19.1745	12.0247	12.3497	11.6997	14.2996	11.6997	12.6747	15.2746	20.1495	13.9747
1255	18.8495	11.6997	12.3497	11.0497	14.2996	11.6997	12.6747	15.2746	20.1495	13.9747
1256	18.8495	11.3747	12.6747	11.3747	14.9496	11.6997	12.3497	15.2746	20.1495	13.9747
1257	19.1745	12.0247	12.6747	11.3747	14.2996	11.3747	12.6747	14.9496	20.4745	13.9747
1258	19.1745	11.6997	12.9997	11.3747	14.6246	11.3747	12.3497	15.2746	20.1495	13.9747
1259	19.4995	11.6997	12.3497	11.3747	14.6246	11.6997	12.9997	15.2746	20.4745	13.9747
1260	19.1745	11.6997	12.3497	11.3747	14.2996	11.6997	12.0247	15.2746	19.8245	13.9747
1261	18.5245	12.0247	12.6747	11.3747	14.6246	11.6997	12.3497	15.2746	19.4995	13.6497
1262	18.8495	12.0247	12.6747	11.3747	14.9496	11.3747	12.3497	15.2746	19.8245	13.9747
1263	18.8495	12.0247	12.6747	11.0497	14.6246	11.3747	12.6747	15.2746	19.8245	13.6497
1264	18.5245	11.6997	12.9997	11.3747	15.2746	11.6997	12.9997	15.2746	19.8245	13.9747
1265	18.8495	11.3747	12.3497	11.0497	14.6246	11.3747	12.6747	15.2746	19.8245	13.9747
1266	18.8495	11.6997	12.6747	11.3747	14.2996	11.6997	12.3497	15.2746	19.8245	13.9747
1267	18.8495	11.6997	12.6747	11.0497	15.2746	11.3747	12.0247	15.2746	19.8245	13.9747
1268	19.1745	12.0247	12.9997	11.3747	14.9496	11.6997	12.3497	15.2746	20.1495	14.2996
1269	18.8495	11.6997	13.3247	11.3747	14.2996	11.3747	12.6747	15.2746	19.8245	13.9747
1270	18.8495	11.3747	12.3497	11.0497	14.6246	11.3747	12.6747	15.2746	19.8245	13.9747
1271	19.1745	12.0247	12.9997	11.0497	14.6246	11.6997	12.3497	15.2746	20.1495	13.9747
1272	19.1745	12.0247	12.9997	11.0497	14.9496	11.3747	12.6747	15.2746	19.8245	13.9747
1273	19.1745	11.6997	13.3247	11.3747	14.6246	11.6997	12.9997	15.2746	19.8245	14.2996
1274	19.4995	11.3747	12.6747	11.0497	14.6246	11.3747	12.6747	15.2746	19.8245	13.9747
1275	18.5245	12.0247	12.9997	11.3747	14.9496	12.0247	12.3497	15.2746	19.8245	13.9747
1276	18.8495	11.6997	12.3497	11.0497	14.6246	11.6997	12.0247	15.2746	19.8245	14.2996
1277	18.8495	11.6997	12.9997	11.3747	14.2996	11.3747	12.3497	15.2746	19.8245	13.9747
1278	18.8495	12.0247	12.6747	11.3747	14.9496	11.6997	12.3497	15.2746	19.8245	13.9747
1279	18.8495	11.6997	12.6747	11.0497	15.2746	11.6997	12.3497	15.2746	19.8245	14.2996
1280	19.1745	12.3497	12.3497	11.0497	14.9496	11.6997	12.0247	15.2746	20.1495	13.9747
1281	18.8495	11.6997	12.6747	11.0497	14.6246	11.6997	12.6747	15.2746	20.1495	14.2996
1282	18.8495	11.6997	12.6747	11.0497	14.9496	11.3747	11.6997	15.2746	20.1495	13.9747
1283	19.1745	11.6997	13.3247	11.0497	14.9496	11.6997	12.3497	15.2746	19.8245	13.9747
1284	18.8495	11.6997	12.6747	11.0497	14.2996	11.6997	12.3497	15.2746	19.8245	14.2996
1285	18.8495	11.3747	12.3497	11.0497	14.6246	11.6997	12.3497	15.2746	19.8245	13.9747
1286	18.8495	12.0247	12.6747	11.3747	14.9496	11.6997	12.6747	15.2746	19.8245	13.9747
1287	18.5245	11.6997	12.6747	11.0497	14.6246	11.6997	12.0247	15.2746	19.8245	13.9747
1288	18.1995	11.3747	12.6747	11.0497	14.6246	11.6997	12.0247	15.2746	19.8245	14.2996
1289	18.5245	11.3747	12.9997	11.0497	14.2996	11.6997	12.3497	15.2746	20.1495	14.2996
1290	18.8495	11.6997	12.6747	11.0497	14.2996	11.3747	12.3497	15.2746	19.8245	13.9747
1291	19.4995	12.0247	12.6747	11.0497	14.6246	11.3747	12.0247	15.2746	19.8245	13.9747
1292	19.1745	12.0247	12.3497	11.0497	14.2996	11.6997	12.3497	15.2746	19.8245	13.9747
1293	18.8495	12.0247	12.3497	11.0497	14.6246	11.6997	12.9997	15.2746	19.8245	13.9747
1294	18.8495	11.3747	12.6747	11.0497	14.6246	11.6997	12.9997	15.2746	19.4995	13.9747
1295	18.8495	12.0247	12.3497	11.0497	14.6246	11.3747	12.3497	15.2746	19.8245	13.6497
1296	18.8495	11.3747	12.6747	11.0497	14.2996	11.6997	12.9997	15.2746	19.8245	13.9747
1297	18.5245	12.0247	12.6747	11.0497	14.9496	11.6997	12.6747	15.2746	19.8245	14.2996
1298	18.5245	11.6997	12.6747	11.0497	14.6246	11.3747	12.6747	15.2746	19.8245	14.2996
1299	18.8495	12.0247	12.6747	11.0497	14.9496	11.6997	12.3497	15.2746	19.8245	14.2996
1300	18.5245	11.6997	12.9997	11.0497	14.6246	11.6997	12.3497	15.2746	19.8245	14.2996
1301	18.8495	12.0247	12.9997	11.0497	14.9496	11.3747	12.9997	15.2746	20.1495	13.9747
1302	18.5245	11.6997	12.6747	11.0497	14.6246	11.6997	12.9997	15.2746	20.1495	14.2996
1303	19.1745	11.3747	12.6747	11.0497	15.2746	11.3747	12.3497	15.2746	19.8245	13.9747
1304	18.8495	11.6997	12.6747	11.0497	14.6246	11.3747	12.6747	15.2746	19.8245	14.2996
1305	18.8495	11.6997	12.6747	11.0497	14.2996	11.6997	12.6747	15.2746	19.8245	14.2996
1306	19.1745	12.0247	12.0247	11.0497	14.2996	11.3747	12.9997	15.2746	19.8245	13.9747
1307	19.1745	11.6997	12.6747	11.0497	14.6246	11.3747	13.3247	15.2746	19.8245	13.9747
1308	19.1745	12.0247	12.6747	11.0497	14.6246	11.6997	12.9997	15.2746	19.4995	13.9747
1309	19.1745	11.6997	12.0247	11.0497	14.6246	11.6997	12.3497	15.2746	19.8245	13.9747
1310	18.5245	12.0247	12.3497	10.7247	14.6246	12.0247	12.9997	15.2746	19.8245	13.9747
1311	18.1995	12.3497	12.0247	11.0497	14.6246	11.6997	12.6747	15.2746	20.1495	13.9747
1312	18.8495	12.0247	12.6747	11.0497	14.9496	11.6997	12.9997	15.2746	19.8245	14.2996
1313	18.1995	12.0247	12.9997	11.0497	14.6246	11.6997	12.6747	15.2746	20.1495	13.6497
1314	18.5245	11.6997	12.6747	11.0497	14.9496	11.6997	12.9997	15.2746	19.8245	13.6497
1315	19.1745	12.3497	12.3497	10.7247	14.9496	11.6997	12.9997	15.2746	19.8245	14.2996
1316	18.8495	11.6997	12.3497	11.0497	14.6246	11.6997	13.3247	15.2746	20.1495	13.9747
1317	18.8495	12.0247	12.6747	11.0497	14.2996	11.6997	13.3247	15.2746	20.1495	14.2996
1318	18.8495	11.6997	12.6747	11.0497	14.6246	11.3747	12.9997	15.2746	20.1495	14.2996
1319	18.8495	11.6997	12.3497	10.7247	14.6246	11.6997	13.9747	15.2746	19.4995	14.2996
1320	18.5245	11.6997	12.9997	11.0497	14.2996	11.6997	13.3247	15.2746	20.1495	14.2996
1321	18.8495	11.6997	12.6747	10.7247	14.2996	11.6997	12.6747	15.2746	20.1495	13.9747
1322	19.4995	11.6997	12.9997	11.0497	14.6246	11.6997	13.3247	15.2746	19.8245	14.2996
1323	18.5245	11.6997	12.6747	10.3997	14.6246	11.6997	12.6747	15.2746	19.8245	14.2996
1324	19.1745	12.0247	12.6747	10.7247	14.6246	11.3747	12.3497	15.2746	19.8245	14.2996
1325	18.1995	11.6997	12.3497	11.0497	14.6246	11.6997	12.9997	15.2746	20.1495	14.6246
1326	18.8495	12.0247	12.3497	10.7247	14.9496	11.6997	12.9997	15.2746	19.8245	13.9747
1327	18.1995	11.3747	12.9997	10.7247	14.2996	11.6997	13.3247	15.2746	19.8245	14.2996
1328	18.5245	11.6997	12.3497	10.7247	14.6246	11.6997	12.9997	15.2746	19.8245	14.2996
1329	19.1745	11.6997	12.3497	10.7247	14.6246	11.6997	12.9997	15.2746	19.8245	14.6246
1330	19.1745	11.6997	12.6747	11.0497	14.2996	11.3747	12.3497	15.2746	19.8245	14.2996
1331	18.8495	11.3747	12.6747	11.0497	14.2996	11.6997	13.3247	15.2746	19.8245	14.2996
1332	18.5245	11.6997	12.3497	11.0497	14.6246	11.6997	13.3247	15.2746	19.8245	14.2996
1333	19.4995	11.6997	12.6747	11.0497	14.6246	11.3747	12.9997	15.2746	19.8245	13.9747
1334	18.5245	11.6997	12.6747	11.0497	14.6246	11.3747	13.3247	15.2746	20.1495	14.2996
1335	18.5245	11.3747	12.3497	11.0497	14.2996	11.6997	12.3497	15.2746	19.8245	14.2996
1336	18.8495	11.6997	12.9997	10.7247	14.9496	11.6997	12.6747	15.2746	19.8245	14.6246
1337	19.1745	11.3747	12.9997	11.0497	14.2996	11.3747	12.3497	15.2746	19.8245	14.2996
1338	19.1745	11.3747	12.3497	11.0497	14.2996	11.6997	13.3247	15.2746	19.8245	14.2996
1339	19.1745	11.6997	12.6747	11.0497	15.2746	11.6997	12.6747	15.2746	20.1495	13.6497
1340	19.1745	12.0247	12.3497	11.0497	14.9496	11.6997	12.9997	15.2746	20.1495	14.2996
1341	18.5245	11.6997	12.3497	11.0497	14.2996	11.3747	12.6747	15.2746	19.8245	14.2996
1342	19.1745	12.0247	12.3497	11.3747	14.9496	11.6997	13.3247	15.2746	19.4995	13.9747
1343	18.5245	11.3747	12.3497	11.3747	14.2996	11.6997	13.3247	15.2746	19.8245	14.2996
1344	18.8495	11.3747	11.6997	11.0497	14.6246	11.6997	12.3497	15.2746	19.8245	13.9747
1345	18.8495	11.6997	12.6747	10.7247	13.9747	11.3747	12.0247	15.2746	19.8245	14.2996
1346	18.8495	12.3497	12.3497	11.0497	14.6246	11.6997	12.9997	15.2746	19.8245	13.9747
1347	18.8495	11.6997	12.3497	11.3747	14.2996	11.6997	12.6747	15.2746	19.4995	14.2996
1348	18.5245	11.6997	12.6747	11.3747	14.6246	11.6997	13.3247	15.2746	19.8245	13.9747
1349	18.8495	11.6997	12.3497	11.0497	14.6246	11.3747	12.9997	15.2746	19.4995	14.2996
1350	18.5245	11.3747	12.0247	11.0497	14.2996	11.6997	12.3497	15.2746	19.4995	14.2996
1351	18.5245	11.6997	12.0247	10.7247	14.2996	11.6997	12.3497	15.2746	19.8245	14.2996
1352	18.1995	11.6997	12.0247	11.0497	14.2996	11.3747	13.9747	15.2746	19.4995	14.2996
1353	19.1745	11.6997	12.0247	10.7247	14.6246	11.3747	12.9997	15.2746	19.4995	13.9747
1354	18.8495	11.6997	12.0247	10.7247	14.2996	11.6997	12.6747	15.2746	19.4995	14.2996
1355	18.8495	11.6997	12.0247	10.7247	14.6246	11.6997	12.9997	15.2746	19.8245	13.6497
1356	18.8495	11.6997	11.6997	11.3747	14.2996	11.6997	12.6747	15.2746	19.8245	13.9747
1357	18.5245	11.6997	12.0247	11.3747	14.6246	11.3747	12.6747	15.2746	19.8245	14.2996
1358	18.8495	11.3747	12.0247	11.3747	14.2996	11.3747	12.6747	15.2746	19.8245	14.2996
1359	18.8495	12.0247	12.0247	11.3747	14.2996	11.3747	12.6747	15.2746	19.8245	13.9747
1360	18.8495	11.6997	12.0247	11.3747	14.6246	11.6997	12.9997	15.2746	19.8245	13.9747
1361	19.1745	12.0247	12.0247	11.6997	14.2996	11.3747	12.6747	15.2746	19.4995	13.6497
1362	19.1745	11.6997	12.3497	11.3747	14.6246	11.6997	12.9997	15.2746	19.4995	13.9747
1363	19.1745	11.6997	12.0247	11.3747	14.6246	11.3747	12.6747	15.2746	19.8245	14.2996
1364	18.5245	11.6997	12.6747	11.3747	14.2996	11.6997	13.6497	15.2746	19.8245	13.9747
1365	19.4995	11.6997	12.3497	11.6997	14.9496	11.3747	12.9997	15.2746	19.8245	13.9747
1366	18.5245	11.6997	12.3497	11.3747	14.2996	11.6997	12.9997	15.2746	19.4995	14.2996
1367	18.8495	11.6997	12.3497	11.6997	13.9747	11.3747	13.3247	15.2746	19.4995	14.6246
1368	18.5245	11.6997	12.0247	11.0497	14.6246	11.6997	13.3247	15.2746	19.4995	13.9747
1369	18.5245	11.6997	12.0247	11.3747	14.6246	11.3747	12.6747	15.2746	19.8245	13.9747
1370	18.1995	11.6997	12.0247	11.6997	14.2996	11.3747	12.6747	15.2746	19.4995	14.2996
1371	18.1995	11.6997	12.3497	11.3747	14.9496	11.6997	12.9997	15.2746	19.8245	14.2996
1372	19.1745	11.3747	12.3497	11.3747	14.6246	11.3747	13.3247	15.2746	19.4995	14.2996
1373	19.1745	11.6997	12.0247	11.3747	14.6246	11.3747	12.6747	15.2746	19.4995	14.2996
1374	18.5245	11.6997	12.0247	11.3747	14.2996	11.3747	12.9997	15.2746	19.8245	13.9747
1375	18.8495	11.6997	12.3497	11.3747	14.2996	11.3747	13.6497	15.2746	19.8245	13.9747
1376	18.1995	11.6997	11.6997	11.3747	14.6246	11.6997	13.3247	15.2746	19.8245	13.9747
1377	18.8495	11.6997	12.3497	11.3747	14.6246	11.3747	13.3247	15.2746	19.4995	13.9747
1378	18.5245	11.6997	12.3497	12.0247	14.6246	11.3747	12.6747	15.2746	19.8245	14.2996
1379	19.1745	11.6997	12.0247	11.6997	14.2996	11.6997	12.9997	15.2746	19.4995	13.6497
1380	18.8495	12.0247	12.3497	11.6997	14.2996	11.6997	12.9997	15.2746	19.4995	13.9747
1381	19.1745	11.6997	12.0247	11.0497	14.9496	11.6997	12.6747	15.2746	19.8245	14.2996
1382	18.8495	11.6997	12.0247	11.3747	14.6246	11.6997	13.3247	15.2746	19.4995	14.2996
1383	18.5245	11.3747	12.3497	11.3747	14.6246	11.6997	12.9997	15.2746	19.1745	14.2996
1384	19.1745	11.6997	12.0247	10.7247	14.6246	11.6997	13.6497	15.2746	19.8245	14.2996
1385	18.8495	11.6997	12.3497	10.7247	14.2996	11.6997	13.9747	15.2746	19.4995	13.6497
1386	18.8495	11.6997	12.3497	10.7247	14.6246	11.3747	13.3247	15.2746	19.8245	14.2996
1387	19.1745	11.6997	12.0247	11.0497	14.6246	11.6997	12.9997	15.2746	19.4995	13.9747
1388	18.5245	12.0247	12.0247	11.3747	14.6246	11.6997	12.9997	15.2746	19.4995	14.2996
1389	18.1995	11.3747	12.3497	11.3747	14.6246	11.0497	13.6497	14.9496	19.4995	14.2996
1390	19.1745	12.0247	12.3497	10.7247	14.2996	11.3747	12.9997	15.2746	19.8245	14.2996
1391	19.1745	12.0247	12.0247	11.0497	14.6246	11.3747	13.6497	15.2746	19.8245	14.2996
1392	18.8495	12.0247	12.3497	11.3747	14.6246	11.6997	12.6747	15.2746	19.8245	13.9747
1393	18.5245	12.0247	12.0247	11.3747	14.2996	11.6997	12.9997	15.2746	19.8245	14.6246
1394	19.1745	11.6997	12.0247	11.6997	14.6246	11.6997	13.3247	15.2746	19.8245	13.9747
1395	18.8495	12.3497	12.0247	11.0497	14.6246	11.3747	13.3247	15.2746	19.8245	13.9747
1396	18.5245	12.0247	12.3497	11.6997	14.2996	11.6997	12.9997	15.2746	20.1495	14.2996
1397	18.8495	12.0247	12.3497	11.6997	14.2996	11.6997	13.3247	15.2746	19.4995	13.9747
1398	18.8495	11.6997	12.3497	11.6997	14.9496	11.6997	12.9997	15.2746	19.8245	14.2996
1399	18.1995	11.6997	12.0247	11.6997	14.9496	11.3747	12.6747	15.2746	19.8245	14.2996
1400	18.5245	12.3497	11.6997	11.6997	14.6246	11.6997	13.3247	15.2746	20.1495	14.2996
1401	19.1745	12.0247	12.0247	11.6997	13.9747	11.0497	12.6747	15.2746	19.4995	14.2996
1402	18.8495	11.6997	12.3497	11.3747	14.2996	11.3747	13.3247	15.2746	20.1495	14.2996
1403	18.5245	12.0247	12.0247	11.6997	14.2996	11.3747	12.6747	15.2746	20.1495	14.2996
1404	18.5245	11.6997	12.0247	11.3747	14.2996	11.6997	12.6747	15.2746	20.1495	13.9747
1405	18.8495	11.6997	12.0247	11.3747	14.6246	11.6997	13.6497	15.2746	20.4745	14.2996
1406	18.8495	11.6997	12.0247	11.6997	14.9496	11.3747	12.9997	15.2746	19.8245	13.9747
1407	19.1745	11.6997	11.6997	11.6997	14.2996	11.6997	12.9997	15.2746	19.8245	13.9747
1408	18.8495	11.6997	11.6997	11.6997	14.9496	11.6997	13.3247	15.2746	20.1495	13.9747
1409	19.1745	11.6997	12.0247	11.6997	14.2996	11.3747	13.6497	15.2746	19.8245	13.9747
1410	18.5245	12.0247	12.0247	11.3747	14.9496	11.6997	12.9997	15.2746	20.1495	13.9747
1411	19.4995	12.0247	12.3497	11.3747	14.9496	11.3747	13.3247	15.2746	20.1495	13.9747
1412	18.8495	11.6997	12.0247	11.3747	14.2996	11.3747	12.6747	15.2746	20.4745	13.9747
1413	18.8495	12.0247	12.0247	11.3747	13.6497	11.3747	13.3247	15.2746	20.4745	13.9747
1414	18.5245	12.0247	11.6997	11.0497	14.2996	11.3747	13.3247	15.2746	20.4745	13.9747
1415	18.8495	12.0247	12.6747	11.3747	14.2996	11.3747	12.9997	15.2746	19.8245	14.2996
1416	18.5245	11.6997	12.3497	11.3747	14.2996	11.6997	12.9997	15.2746	19.8245	14.2996
1417	18.5245	12.0247	12.0247	11.3747	14.9496	11.6997	12.9997	15.2746	19.8245	13.9747
1418	18.5245	12.0247	12.6747	11.3747	15.2746	11.0497	13.6497	15.2746	19.8245	13.9747
1419	18.5245	12.0247	12.3497	11.0497	14.2996	11.3747	13.3247	15.2746	19.8245	14.2996
1420	18.5245	12.0247	12.0247	11.0497	14.6246	11.3747	13.3247	15.2746	20.1495	13.9747
1421	18.8495	12.0247	12.6747	11.3747	14.2996	11.3747	12.9997	15.2746	20.4745	14.2996
1422	19.1745	12.0247	12.3497	11.3747	14.6246	11.3747	12.6747	15.2746	19.8245	14.2996
1423	18.5245	12.0247	12.3497	11.3747	14.2996	11.6997	13.6497	15.2746	20.1495	14.2996
1424	18.5245	12.0247	12.0247	11.3747	14.2996	11.3747	13.3247	15.2746	19.4995	13.9747
1425	18.8495	11.6997	12.3497	11.3747	14.2996	11.6997	13.6497	15.2746	19.8245	13.9747
1426	18.8495	11.6997	12.3497	11.3747	14.6246	11.6997	13.3247	15.2746	20.4745	13.9747
1427	18.5245	12.0247	12.0247	11.3747	15.2746	11.3747	12.6747	15.2746	20.1495	13.9747
1428	18.5245	12.0247	12.0247	11.3747	14.2996	11.3747	12.9997	15.2746	20.1495	13.9747
1429	18.5245	11.6997	12.0247	11.3747	14.2996	11.6997	12.6747	15.2746	19.8245	13.9747
1430	18.5245	11.6997	12.0247	11.0497	14.6246	11.3747	12.9997	15.2746	19.8245	13.9747
1431	18.8495	11.6997	12.6747	10.7247	14.6246	11.3747	13.6497	15.2746	19.4995	14.2996
1432	18.8495	11.6997	12.0247	10.7247	14.6246	11.3747	13.3247	15.2746	20.1495	13.9747
1433	18.5245	12.0247	12.0247	11.0497	14.2996	11.6997	12.9997	15.2746	19.8245	13.9747
1434	18.8495	11.6997	11.6997	10.7247	14.6246	11.3747	13.6497	15.2746	19.8245	14.2996
1435	18.5245	12.0247	12.0247	10.7247	14.9496	11.6997	12.9997	15.2746	20.1495	13.9747
1436	18.5245	12.0247	12.3497	10.7247	13.9747	11.6997	12.9997	15.2746	19.4995	14.2996
1437	18.5245	12.0247	12.0247	10.7247	14.2996	11.3747	13.3247	15.2746	19.8245	13.9747
1438	18.5245	12.0247	12.3497	11.0497	14.2996	11.0497	13.3247	15.2746	20.1495	13.9747
1439	19.1745	11.6997	12.0247	10.7247	14.2996	11.6997	12.9997	15.2746	20.1495	13.9747
1440	19.1745	11.6997	12.3497	11.0497	14.6246	11.3747	12.9997	15.2746	20.1495	14.2996
1441	18.5245	11.3747	12.0247	11.0497	14.2996	11.3747	13.3247	15.2746	19.8245	13.9747
1442	19.1745	11.6997	12.0247	11.0497	14.2996	11.3747	13.3247	15.2746	20.1495	13.9747
1443	18.1995	12.3497	11.6997	11.0497	14.2996	11.6997	12.6747	15.2746	19.4995	14.2996
1444	18.5245	11.6997	12.0247	10.7247	14.2996	11.6997	12.6747	15.2746	19.8245	13.9747
1445	18.5245	11.6997	11.6997	10.7247	14.6246	11.3747	13.3247	15.2746	19.4995	14.2996
1446	18.8495	11.6997	12.0247	11.0497	13.9747	11.0497	13.3247	15.2746	20.1495	13.9747
1447	18.5245	12.0247	12.3497	11.0497	14.2996	11.3747	13.3247	15.2746	19.8245	13.9747
1448	18.8495	11.6997	12.0247	11.0497	14.6246	11.6997	12.6747	15.2746	19.4995	14.2996
1449	18.8495	12.0247	12.3497	11.3747	14.6246	11.3747	12.9997	15.2746	20.1495	14.2996
1450	18.5245	11.6997	11.6997	11.3747	14.2996	11.0497	12.9997	15.2746	19.8245	14.2996
1451	18.8495	12.0247	12.3497	11.0497	14.2996	12.0247	12.9997	15.2746	19.8245	14.2996
1452	18.8495	11.6997	12.0247	11.0497	14.6246	11.6997	13.3247	15.2746	20.1495	14.2996
1453	18.1995	11.6997	11.6997	10.7247	14.2996	11.6997	13.3247	15.2746	20.1495	14.2996
1454	18.5245	11.6997	12.0247	11.0497	14.2996	11.3747	12.9997	15.2746	19.8245	13.9747
1455	18.5245	11.6997	12.0247	10.7247	14.6246	11.6997	12.9997	15.2746	19.8245	13.9747
1456	18.5245	11.6997	12.6747	10.7247	13.9747	11.3747	13.3247	15.2746	20.1495	13.9747
1457	18.8495	12.0247	11.6997	10.7247	13.9747	11.3747	13.6497	15.2746	20.1495	13.9747
1458	18.5245	11.6997	12.3497	10.7247	13.9747	11.3747	12.6747	15.2746	20.1495	13.9747
1459	18.8495	12.0247	12.0247	10.7247	14.2996	11.6997	13.6497	15.2746	20.1495	13.9747
1460	18.8495	12.0247	12.0247	10.7247	13.6497	11.6997	12.9997	15.2746	19.8245	14.2996
1461	18.8495	11.6997	11.6997	10.7247	13.9747	11.6997	12.6747	15.2746	19.8245	13.9747
1462	18.8495	11.6997	12.0247	10.7247	14.2996	11.6997	12.9997	15.2746	19.8245	14.2996
1463	18.5245	11.6997	12.0247	10.7247	13.9747	11.6997	12.9997	15.2746	19.8245	13.9747
1464	18.8495	12.0247	12.3497	10.7247	14.6246	11.3747	12.6747	15.2746	20.4745	14.2996
1465	18.8495	12.0247	12.3497	11.0497	13.9747	11.6997	12.9997	15.2746	20.1495	14.2996
1466	18.5245	11.6997	12.6747	10.7247	14.2996	11.6997	12.9997	15.2746	20.1495	13.6497
1467	18.8495	11.6997	12.3497	11.0497	13.6497	11.3747	12.9997	14.9496	20.4745	14.2996
1468	18.8495	12.0247	12.6747	11.0497	13.9747	11.3747	13.3247	15.2746	19.8245	14.2996
1469	19.1745	11.6997	12.3497	11.0497	13.9747	11.6997	12.9997	15.2746	19.8245	13.9747
1470	18.5245	11.3747	12.3497	11.0497	14.2996	11.3747	12.6747	15.2746	19.8245	14.2996
1471	18.1995	12.0247	12.9997	11.0497	13.9747	11.3747	12.9997	15.2746	19.8245	13.9747
1472	18.5245	11.6997	12.6747	11.3747	14.2996	11.6997	12.6747	15.2746	19.8245	13.9747
1473	18.1995	11.6997	12.3497	10.7247	13.6497	11.3747	12.9997	15.2746	19.8245	13.6497
1474	18.8495	11.6997	12.6747	11.0497	13.6497	11.3747	12.9997	15.2746	19.8245	14.2996
1475	18.5245	11.6997	12.3497	10.7247	13.6497	11.6997	12.9997	15.2746	19.8245	14.2996
1476	19.1745	12.0247	12.3497	11.0497	13.6497	11.3747	12.9997	15.2746	19.8245	13.9747
1477	18.8495	11.6997	12.9997	10.7247	13.9747	11.3747	12.9997	15.2746	20.1495	14.2996
1478	18.5245	11.3747	12.6747	10.7247	13.9747	11.3747	12.6747	15.2746	20.1495	13.9747
1479	18.1995	11.6997	12.6747	10.0747	13.6497	11.3747	12.9997	15.2746	20.1495	13.9747
1480	18.5245	11.3747	12.3497	10.3997	13.6497	11.6997	12.9997	15.2746	19.8245	13.9747
1481	18.1995	11.6997	12.6747	10.3997	14.2996	11.6997	12.3497	15.2746	19.8245	14.2996
1482	18.1995	11.6997	12.6747	10.7247	13.6497	11.6997	13.3247	15.2746	20.1495	13.6497
1483	18.5245	11.6997	12.6747	11.0497	13.6497	11.6997	12.0247	15.2746	20.1495	13.9747
1484	18.8495	11.6997	12.9997	11.0497	13.6497	11.3747	12.6747	15.2746	20.1495	13.9747
1485	18.8495	12.0247	12.3497	10.3997	13.6497	11.6997	13.6497	15.2746	20.4745	14.2996
1486	18.8495	11.6997	12.6747	10.0747	13.6497	11.3747	12.6747	15.2746	19.8245	13.9747
1487	18.5245	12.0247	12.3497	10.3997	13.6497	11.6997	12.6747	15.2746	20.1495	13.9747
1488	19.1745	12.0247	12.3497	10.0747	13.9747	12.0247	12.3497	15.2746	20.1495	13.9747
1489	18.5245	11.3747	12.6747	10.0747	13.9747	11.6997	12.9997	15.2746	19.8245	13.9747
1490	18.8495	11.6997	12.9997	10.3997	14.2996	11.3747	12.9997	15.2746	19.4995	13.9747
1491	18.8495	11.6997	12.6747	10.0747	14.2996	11.6997	12.6747	15.2746	20.1495	14.2996
1492	18.5245	12.0247	12.3497	10.3997	13.9747	11.6997	12.3497	15.2746	19.4995	13.9747
1493	18.5245	11.6997	12.6747	10.0747	14.2996	11.6997	12.3497	15.2746	19.8245	13.9747
1494	18.8495	11.6997	12.6747	10.0747	13.9747	12.0247	13.6497	15.2746	20.1495	13.9747
1495	18.5245	11.3747	12.0247	10.0747	13.6497	11.6997	12.9997	15.2746	19.8245	13.9747
1496	18.1995	11.6997	12.9997	10.7247	13.6497	11.6997	12.6747	15.2746	20.1495	14.2996
1497	18.5245	11.6997	12.0247	10.3997	13.9747	11.6997	13.6497	15.2746	19.8245	13.9747
1498	18.8495	12.0247	12.9997	10.7247	13.9747	11.6997	12.9997	15.2746	19.8245	13.9747
1499	18.8495	11.6997	12.0247	10.7247	14.2996	11.6997	13.3247	15.2746	19.8245	13.9747
1500	18.5245	11.6997	12.6747	10.7247	13.9747	11.6997	12.6747	15.2746	19.8245	13.9747
1501	18.5245	11.3747	12.6747	11.0497	13.6497	11.6997	12.9997	15.2746	19.8245	13.9747
1502	18.1995	12.0247	12.3497	10.7247	13.9747	11.6997	12.9997	15.2746	20.1495	13.9747
1503	18.5245	11.6997	12.0247	10.3997	13.6497	11.6997	12.9997	15.2746	19.8245	13.9747
1504	18.8495	11.3747	12.3497	10.3997	13.6497	11.6997	12.6747	15.2746	19.8245	14.2996
1505	18.8495	11.6997	12.3497	10.7247	13.9747	11.6997	12.3497	15.2746	19.8245	13.9747
1506	18.5245	12.0247	12.3497	10.3997	14.2996	11.6997	13.3247	15.2746	20.1495	13.9747
1507	18.8495	12.3497	12.6747	10.3997	13.9747	11.3747	12.3497	15.2746	20.1495	13.9747
1508	18.5245	12.0247	12.0247	10.0747	13.9747	11.6997	12.3497	15.2746	19.4995	13.9747
1509	18.1995	12.0247	12.3497	10.0747	14.2996	12.0247	12.6747	15.2746	20.1495	13.9747
1510	18.5245	11.6997	12.6747	10.7247	13.9747	11.6997	12.6747	15.2746	20.1495	13.6497
1511	19.4995	11.3747	12.3497	10.3997	14.2996	12.0247	12.9997	15.2746	19.8245	13.9747
1512	18.8495	11.6997	12.6747	10.3997	13.9747	12.0247	12.3497	15.2746	19.8245	13.9747
1513	18.8495	11.6997	12.3497	10.0747	14.2996	11.3747	13.3247	15.2746	20.1495	14.2996
1514	17.8746	11.6997	12.6747	10.3997	13.9747	11.6997	12.9997	15.2746	19.4995	14.2996
1515	18.8495	11.3747	12.9997	10.3997	14.2996	11.6997	13.6497	15.2746	20.1495	13.9747
1516	18.1995	11.3747	12.6747	10.0747	14.2996	11.3747	12.3497	15.2746	19.4995	13.9747
1517	18.8495	11.6997	12.6747	10.7247	14.2996	11.6997	12.9997	15.2746	20.1495	13.9747
1518	18.8495	11.0497	12.3497	10.7247	14.2996	11.3747	12.3497	15.2746	19.4995	13.9747
1519	18.1995	11.6997	12.3497	10.7247	14.2996	11.6997	12.6747	15.2746	19.8245	13.6497
1520	18.1995	11.6997	12.3497	10.3997	14.2996	11.3747	12.9997	15.2746	20.1495	14.2996
1521	18.8495	11.6997	12.9997	11.0497	14.2996	11.3747	12.6747	15.2746	20.1495	13.9747
1522	18.1995	11.6997	12.6747	10.7247	14.2996	11.6997	12.6747	15.2746	20.1495	13.9747
1523	18.1995	12.0247	12.3497	11.0497	13.9747	11.6997	13.3247	15.2746	20.1495	13.6497
1524	18.5245	11.6997	12.6747	10.7247	14.6246	11.6997	12.9997	15.2746	19.8245	13.9747
1525	18.8495	11.3747	12.0247	10.7247	13.9747	11.6997	12.6747	15.2746	20.4745	13.9747
1526	18.8495	11.6997	12.0247	11.0497	14.2996	11.6997	12.0247	15.2746	20.1495	13.9747
1527	18.1995	11.6997	12.0247	11.0497	14.2996	11.6997	12.3497	15.2746	19.8245	14.2996
1528	18.5245	11.6997	12.0247	11.0497	14.2996	11.6997	13.6497	15.2746	19.8245	13.9747
1529	18.5245	11.6997	12.0247	10.7247	13.6497	11.6997	12.6747	15.2746	19.8245	13.9747
1530	18.5245	11.6997	12.6747	10.7247	13.6497	11.3747	12.9997	15.2746	20.1495	13.9747
1531	18.8495	11.6997	12.3497	10.3997	13.6497	11.3747	12.6747	15.2746	19.8245	13.9747
1532	18.5245	12.0247	12.3497	10.0747	14.2996	11.6997	13.6497	15.2746	20.1495	13.9747
1533	19.4995	11.3747	12.3497	10.3997	13.9747	11.6997	12.3497	15.2746	20.1495	13.9747
1534	18.1995	12.0247	12.9997	10.3997	13.9747	11.6997	12.9997	15.2746	20.1495	13.9747
1535	17.8746	12.0247	12.6747	10.7247	13.9747	11.3747	13.3247	15.2746	19.8245	13.9747
1536	18.1995	11.6997	12.6747	10.3997	14.2996	11.3747	12.6747	14.9496	19.8245	13.9747
1537	19.1745	11.6997	12.6747	10.0747	14.2996	11.3747	12.6747	15.2746	20.4745	13.9747
1538	18.8495	12.0247	12.3497	10.7247	14.2996	11.3747	12.6747	15.2746	19.8245	13.9747
1539	18.5245	11.6997	12.3497	10.7247	14.6246	11.6997	12.9997	14.9496	20.1495	13.9747
1540	18.5245	12.0247	12.6747	10.7247	14.2996	11.3747	12.6747	15.2746	19.8245	13.9747
1541	19.1745	11.6997	12.3497	10.3997	14.6246	11.6997	12.6747	15.2746	20.1495	13.9747
1542	18.1995	11.6997	12.3497	10.7247	14.6246	11.3747	12.3497	15.2746	20.1495	13.9747
1543	18.5245	12.0247	12.0247	10.3997	14.6246	11.6997	12.3497	14.9496	19.8245	14.2996
1544	18.5245	12.0247	12.6747	10.3997	14.2996	11.6997	13.9747	15.2746	19.8245	13.9747
1545	18.1995	12.0247	12.0247	10.3997	14.6246	11.3747	12.6747	15.2746	19.4995	13.9747
1546	18.5245	12.0247	12.6747	10.3997	14.2996	11.3747	12.3497	15.2746	20.1495	13.9747
1547	17.8746	11.6997	12.0247	10.7247	13.9747	11.6997	12.9997	15.2746	19.8245	13.9747
1548	18.5245	12.0247	12.3497	10.7247	13.9747	11.6997	12.6747	15.2746	19.8245	13.9747
1549	17.8746	11.6997	12.0247	11.0497	14.6246	11.6997	12.3497	15.2746	19.8245	13.6497
1550	18.5245	11.6997	12.6747	11.0497	13.9747	11.6997	12.3497	15.2746	19.8245	13.9747
1551	19.4995	11.6997	12.6747	11.0497	14.2996	11.6997	12.3497	15.2746	20.1495	13.9747
1552	18.1995	12.0247	12.6747	11.0497	13.9747	11.3747	12.6747	15.2746	19.8245	13.9747
1553	18.5245	11.6997	12.3497	10.7247	14.2996	11.3747	12.9997	15.2746	19.8245	13.9747
1554	19.1745	11.3747	13.3247	11.0497	14.2996	11.6997	12.0247	15.2746	19.8245	13.6497
1555	18.1995	11.6997	12.6747	10.7247	14.2996	11.3747	11.6997	15.2746	20.1495	13.9747
1556	18.8495	12.0247	12.9997	10.3997	14.2996	11.6997	12.3497	15.2746	19.8245	13.9747
1557	18.5245	12.0247	12.3497	11.0497	13.9747	11.6997	12.3497	15.2746	19.8245	13.9747
1558	18.8495	11.3747	12.3497	10.7247	13.9747	11.3747	12.3497	15.2746	19.8245	13.9747
1559	18.8495	11.6997	12.0247	10.7247	13.6497	11.3747	11.3747	15.2746	19.4995	13.9747
1560	18.5245	11.6997	12.9997	11.0497	13.6497	11.3747	12.6747	15.2746	20.1495	13.6497
1561	19.1745	11.6997	13.3247	10.7247	13.9747	11.3747	12.3497	15.2746	20.1495	13.9747
1562	18.5245	12.0247	12.9997	11.0497	14.2996	11.3747	12.6747	15.2746	19.8245	13.9747
1563	18.1995	11.6997	12.9997	10.7247	13.9747	11.6997	12.6747	15.2746	19.4995	13.9747
1564	18.8495	11.6997	12.6747	10.7247	13.9747	11.6997	12.9997	15.2746	19.8245	13.9747
1565	18.5245	11.6997	12.9997	10.7247	13.9747	11.3747	12.6747	15.2746	19.8245	13.6497
1566	18.5245	11.6997	12.9997	11.3747	14.2996	11.3747	12.0247	15.2746	19.8245	13.9747
1567	18.5245	11.6997	13.3247	10.7247	14.2996	11.3747	12.6747	15.2746	19.8245	13.9747
1568	17.8746	12.0247	12.6747	11.0497	14.2996	11.6997	12.3497	15.2746	19.8245	13.9747
1569	17.8746	12.0247	12.9997	11.0497	13.6497	11.3747	12.6747	15.2746	19.8245	14.2996
1570	18.5245	11.6997	12.6747	11.0497	13.9747	11.3747	12.9997	15.2746	20.1495	14.2996
1571	18.1995	11.6997	12.3497	11.0497	14.2996	11.3747	11.6997	15.2746	20.1495	14.6246
1572	18.8495	11.6997	12.0247	11.3747	14.2996	11.6997	12.6747	15.2746	19.8245	13.9747
1573	18.5245	12.0247	12.6747	11.0497	14.2996	11.3747	12.3497	14.9496	20.1495	13.9747
1574	18.5245	11.3747	12.6747	11.0497	14.2996	11.3747	11.6997	15.2746	19.8245	14.2996
1575	18.5245	11.6997	12.3497	11.0497	14.2996	11.6997	12.0247	15.2746	19.8245	14.2996
1576	18.1995	11.3747	12.3497	10.7247	14.2996	11.3747	12.6747	15.2746	19.8245	14.2996
1577	18.1995	12.0247	12.3497	11.0497	14.2996	11.3747	11.6997	15.2746	19.8245	13.9747
1578	18.5245	12.0247	12.3497	11.3747	14.2996	11.3747	12.3497	15.2746	19.4995	14.2996
1579	18.5245	12.0247	12.3497	11.0497	14.6246	11.3747	12.3497	15.2746	19.8245	13.9747
1580	18.5245	11.3747	12.3497	10.7247	14.2996	11.3747	12.0247	15.2746	19.8245	14.2996
1581	19.1745	11.6997	12.6747	10.7247	14.2996	11.3747	12.3497	15.2746	19.4995	14.2996
1582	17.8746	11.6997	12.3497	10.7247	14.2996	11.3747	12.3497	14.9496	19.8245	14.2996
1583	18.8495	11.6997	12.3497	10.7247	14.6246	11.3747	12.3497	15.2746	19.4995	14.6246
1584	18.1995	12.0247	12.3497	11.0497	14.6246	11.3747	12.3497	15.2746	20.1495	14.2996
1585	18.1995	11.6997	12.0247	11.0497	14.2996	11.3747	12.9997	14.9496	19.4995	13.9747
1586	18.1995	11.6997	12.3497	11.0497	14.2996	11.3747	12.3497	15.2746	19.8245	13.9747
1587	18.5245	11.6997	12.0247	11.0497	14.2996	11.3747	12.0247	15.2746	19.8245	13.9747
1588	18.5245	12.0247	12.3497	10.7247	14.6246	11.3747	12.0247	14.9496	20.1495	13.6497
1589	18.5245	12.0247	12.3497	10.7247	14.2996	11.3747	12.3497	15.2746	19.8245	14.2996
1590	18.5245	11.6997	12.3497	11.0497	14.6246	11.3747	12.6747	14.9496	19.4995	14.2996
1591	18.5245	11.3747	12.0247	11.0497	14.6246	11.3747	12.6747	15.2746	19.4995	14.2996
1592	18.1995	11.3747	12.3497	11.0497	14.9496	11.3747	12.3497	15.2746	19.4995	13.9747
1593	17.8746	11.6997	12.3497	11.0497	14.6246	11.3747	12.3497	15.2746	19.8245	14.2996
1594	18.1995	12.0247	12.6747	11.0497	14.6246	11.3747	11.6997	15.2746	19.4995	13.9747
1595	18.1995	11.3747	12.3497	11.0497	14.2996	11.3747	12.6747	15.2746	19.4995	13.9747
1596	18.5245	11.6997	12.0247	10.7247	14.2996	11.3747	12.0247	15.2746	19.4995	13.9747
1597	18.1995	12.0247	12.6747	10.7247	14.6246	11.3747	12.6747	15.2746	19.8245	14.2996
1598	18.5245	11.6997	12.6747	11.0497	14.6246	11.3747	12.3497	15.2746	19.8245	13.9747
1599	18.1995	11.3747	12.9997	11.0497	14.6246	11.3747	12.3497	15.2746	19.8245	14.2996
1600	18.5245	12.0247	12.3497	10.7247	14.9496	11.3747	12.3497	14.9496	19.4995	14.2996
1601	18.1995	11.6997	12.6747	10.7247	14.6246	11.3747	11.6997	15.2746	19.4995	13.6497
1602	18.5245	12.0247	12.6747	10.7247	14.2996	11.3747	13.3247	15.2746	19.4995	13.9747
1603	18.1995	12.0247	12.0247	10.7247	14.6246	11.3747	12.9997	15.2746	19.8245	13.9747
1604	18.1995	11.6997	12.3497	10.3997	14.9496	11.3747	12.6747	15.2746	19.4995	14.2996
1605	18.1995	11.6997	12.6747	11.0497	14.2996	11.3747	12.3497	15.2746	19.8245	13.9747
1606	18.1995	11.6997	12.9997	10.7247	14.6246	11.3747	12.0247	15.2746	19.8245	14.2996
1607	18.1995	11.6997	12.9997	11.0497	14.6246	11.3747	12.6747	15.2746	19.4995	14.2996
1608	17.8746	12.0247	12.9997	11.0497	15.5996	11.3747	12.3497	15.2746	19.8245	14.2996
1609	18.5245	11.6997	12.3497	10.7247	14.6246	11.3747	12.0247	15.2746	19.8245	13.9747
1610	18.5245	11.6997	12.6747	10.7247	14.9496	11.3747	12.3497	15.2746	19.4995	14.2996
1611	18.5245	12.0247	12.3497	11.0497	14.9496	11.3747	12.3497	15.2746	19.4995	13.6497
1612	18.5245	11.3747	13.3247	11.0497	14.6246	11.3747	12.0247	14.9496	19.8245	14.2996
1613	18.5245	12.0247	12.3497	11.0497	14.6246	11.3747	12.3497	14.9496	19.8245	13.9747
1614	18.8495	12.3497	12.6747	10.7247	14.6246	11.3747	12.9997	15.2746	19.4995	14.2996
1615	18.1995	12.0247	12.3497	11.0497	14.6246	11.3747	12.6747	15.2746	19.8245	14.2996
1616	18.5245	12.3497	12.6747	11.0497	14.6246	11.3747	13.3247	15.2746	19.8245	14.2996
1617	17.8746	11.6997	12.3497	11.0497	14.2996	11.0497	12.9997	15.2746	19.8245	14.2996
1618	18.5245	12.0247	12.9997	11.0497	14.6246	11.3747	12.0247	15.2746	19.8245	13.9747
1619	18.1995	11.3747	12.6747	10.7247	14.6246	11.3747	12.3497	15.2746	19.8245	13.9747
1620	18.5245	11.6997	12.6747	11.0497	14.6246	11.3747	12.6747	15.2746	19.4995	13.9747
1621	18.5245	11.6997	12.3497	11.3747	14.6246	11.3747	12.6747	14.9496	19.8245	13.9747
1622	18.1995	12.0247	12.6747	11.0497	14.6246	11.3747	12.0247	15.2746	19.1745	14.2996
1623	17.8746	11.6997	12.3497	11.3747	14.6246	11.3747	12.3497	14.9496	19.4995	13.9747
1624	17.8746	12.3497	12.6747	11.3747	14.6246	11.3747	12.6747	14.9496	20.1495	13.9747
1625	18.1995	12.0247	12.3497	11.0497	14.9496	11.0497	12.3497	15.2746	19.8245	13.6497
1626	18.5245	12.0247	12.3497	10.7247	14.6246	11.3747	12.0247	14.9496	19.8245	14.2996
1627	18.1995	11.6997	12.3497	11.0497	14.6246	11.3747	12.9997	15.2746	19.8245	13.9747
1628	18.5245	12.0247	13.3247	10.7247	14.6246	11.3747	12.6747	15.2746	19.8245	14.2996
1629	18.8495	12.0247	13.3247	10.7247	14.6246	11.3747	13.3247	15.2746	20.1495	14.2996
1630	17.8746	12.0247	12.9997	10.7247	14.6246	11.3747	12.6747	14.9496	19.8245	14.2996
1631	18.1995	11.6997	12.9997	10.7247	14.6246	11.3747	12.9997	14.9496	19.8245	13.6497
1632	18.8495	11.3747	12.9997	10.7247	14.6246	11.3747	12.3497	15.2746	20.1495	13.9747
1633	17.8746	12.0247	13.3247	10.7247	14.6246	11.0497	12.3497	14.9496	19.4995	13.9747
1634	18.8495	11.6997	13.6497	10.7247	14.9496	11.3747	12.3497	15.2746	20.4745	14.2996
1635	18.1995	11.3747	12.9997	10.7247	14.2996	11.3747	12.9997	14.9496	20.1495	14.2996
1636	18.5245	12.0247	13.3247	10.7247	14.6246	11.3747	12.6747	15.2746	19.8245	14.2996
1637	17.8746	11.6997	12.6747	10.7247	14.6246	11.3747	13.3247	14.9496	20.1495	13.6497
1638	18.8495	12.0247	13.3247	10.7247	14.6246	11.3747	12.6747	15.2746	20.1495	14.2996
1639	18.1995	12.0247	13.3247	10.7247	14.9496	11.3747	12.9997	14.9496	20.1495	13.6497
1640	18.1995	12.0247	12.6747	10.7247	14.9496	11.0497	12.3497	14.9496	19.8245	13.9747
1641	18.8495	12.0247	13.3247	11.0497	14.9496	11.3747	12.6747	15.2746	19.8245	13.9747
1642	18.1995	11.6997	12.6747	10.7247	14.6246	11.3747	12.6747	15.2746	19.8245	13.9747
1643	18.5245	11.6997	12.6747	10.7247	14.6246	11.3747	12.9997	15.2746	20.1495	14.2996
1644	17.8746	11.6997	12.3497	11.0497	14.9496	11.3747	12.6747	14.9496	19.8245	13.9747
1645	18.1995	12.0247	12.9997	10.7247	14.9496	11.3747	12.6747	14.9496	19.8245	14.2996
1646	18.1995	11.6997	12.6747	10.7247	14.6246	11.3747	12.6747	14.9496	19.8245	13.9747
1647	17.5496	12.0247	12.9997	11.0497	14.6246	11.3747	13.3247	15.2746	19.8245	14.2996
1648	18.5245	11.6997	12.0247	11.0497	14.9496	11.3747	12.6747	15.2746	19.8245	14.2996
1649	17.8746	12.0247	12.6747	11.0497	14.6246	11.3747	12.6747	15.2746	19.8245	13.9747
1650	17.5496	11.6997	12.9997	11.0497	14.6246	11.3747	12.0247	15.2746	19.4995	13.9747
1651	18.1995	11.6997	12.6747	11.0497	14.6246	11.3747	12.6747	14.9496	20.1495	13.9747
1652	18.5245	11.6997	12.3497	11.0497	14.6246	11.3747	12.3497	14.9496	20.1495	13.9747
1653	18.5245	11.3747	12.6747	11.0497	14.6246	11.3747	12.6747	15.2746	20.1495	13.9747
1654	17.5496	11.6997	12.9997	11.0497	14.6246	11.3747	12.3497	15.2746	19.8245	13.9747
1655	18.5245	11.6997	12.3497	11.3747	14.6246	11.3747	12.6747	15.2746	19.8245	13.9747
1656	17.2246	11.6997	12.3497	11.0497	14.6246	11.3747	12.6747	15.2746	20.1495	14.2996
1657	18.1995	11.6997	12.6747	11.3747	14.6246	11.3747	12.3497	14.9496	20.4745	13.6497
1658	17.8746	11.6997	12.9997	11.3747	14.6246	11.0497	12.6747	15.2746	19.8245	13.9747
1659	18.1995	11.6997	12.9997	11.3747	14.2996	11.3747	12.3497	15.2746	19.8245	13.9747
1660	17.8746	11.3747	13.6497	11.0497	14.6246	11.3747	12.3497	14.9496	19.8245	13.9747
1661	17.5496	12.0247	12.3497	11.0497	14.6246	11.6997	12.9997	14.9496	19.8245	13.9747
1662	18.1995	12.0247	12.9997	10.7247	14.2996	11.3747	12.6747	14.9496	19.8245	13.9747
1663	17.5496	11.6997	12.9997	10.3997	14.6246	11.3747	12.3497	15.2746	19.8245	13.9747
1664	17.8746	12.0247	13.6497	10.3997	14.6246	11.3747	12.6747	14.9496	19.8245	13.9747
1665	17.8746	12.0247	13.3247	10.0747	14.9496	11.3747	12.6747	14.9496	20.1495	13.9747
1666	17.8746	12.0247	13.6497	10.0747	14.6246	11.0497	12.0247	15.2746	19.8245	13.9747
1667	18.1995	12.0247	12.9997	10.0747	14.6246	11.3747	12.6747	14.9496	20.4745	13.9747
1668	18.1995	11.6997	13.9747	10.0747	14.6246	11.3747	12.9997	15.2746	20.1495	13.9747
1669	18.5245	11.6997	13.6497	10.3997	14.6246	11.3747	12.6747	15.2746	19.8245	13.9747
1670	17.8746	11.6997	12.3497	9.74976	14.6246	11.3747	12.9997	15.2746	20.1495	13.9747
1671	17.5496	11.6997	13.3247	9.74976	14.6246	11.3747	12.0247	14.9496	19.8245	13.9747
1672	18.1995	12.0247	13.3247	10.0747	14.2996	11.0497	12.3497	15.2746	19.8245	13.9747
1673	17.5496	11.6997	12.9997	10.0747	14.6246	11.3747	12.3497	15.2746	19.8245	14.2996
1674	17.8746	12.0247	13.3247	10.7247	14.6246	11.3747	12.6747	14.9496	20.1495	13.9747
1675	16.8996	11.3747	12.9997	10.7247	14.6246	11.3747	12.9997	15.2746	19.8245	13.9747
1676	17.5496	11.3747	12.6747	11.0497	14.6246	11.3747	12.6747	15.2746	19.8245	13.6497
1677	17.8746	11.6997	12.6747	10.7247	14.6246	11.3747	12.6747	15.2746	19.8245	14.2996
1678	17.5496	12.3497	13.3247	10.7247	14.6246	11.0497	12.9997	15.2746	19.8245	13.9747
1679	17.5496	11.6997	13.6497	10.3997	14.6246	11.0497	12.3497	14.9496	19.8245	13.9747
1680	17.2246	11.6997	13.3247	10.3997	14.6246	11.3747	12.6747	14.9496	19.8245	13.9747
1681	17.8746	11.6997	12.6747	10.3997	14.6246	11.3747	12.9997	15.2746	19.8245	14.2996
1682	17.5496	11.6997	13.3247	11.0497	14.6246	11.3747	12.6747	14.9496	19.8245	13.9747
1683	17.8746	12.0247	12.3497	11.0497	14.6246	11.3747	12.3497	15.2746	19.8245	13.9747
1684	17.8746	12.0247	13.3247	11.0497	14.2996	11.3747	12.3497	15.2746	20.1495	13.9747
1685	17.8746	12.0247	12.6747	11.0497	14.2996	11.0497	12.3497	15.2746	20.1495	13.9747
1686	18.5245	12.0247	12.6747	11.0497	14.6246	11.3747	12.3497	15.2746	19.8245	14.2996
1687	18.1995	11.6997	13.3247	11.0497	14.2996	11.3747	12.3497	15.2746	19.8245	13.9747
1688	17.8746	11.6997	12.9997	11.0497	14.2996	11.3747	12.6747	15.2746	19.4995	13.9747
1689	17.8746	12.0247	12.9997	11.0497	14.6246	11.3747	12.6747	14.9496	19.8245	14.2996
1690	17.8746	12.3497	13.6497	11.0497	13.9747	11.3747	12.0247	14.9496	19.8245	14.2996
1691	17.5496	11.6997	13.3247	10.7247	13.9747	11.0497	12.9997	15.2746	19.8245	14.2996
1692	17.2246	12.0247	13.3247	11.0497	14.6246	11.3747	12.9997	15.2746	20.4745	13.9747
1693	17.2246	12.0247	13.3247	11.0497	14.2996	11.3747	12.6747	15.2746	19.8245	14.2996
1694	17.2246	11.6997	13.3247	11.0497	14.2996	11.3747	12.6747	15.2746	19.8245	13.6497
1695	17.8746	11.6997	13.6497	11.0497	14.2996	11.3747	12.3497	15.2746	19.8245	13.9747
1696	17.8746	11.3747	13.3247	11.0497	13.9747	11.3747	12.0247	14.9496	20.4745	13.9747
1697	17.2246	11.6997	13.3247	11.3747	14.2996	11.3747	12.3497	14.9496	20.1495	13.9747
1698	17.5496	11.3747	12.9997	11.0497	14.2996	11.3747	12.3497	15.2746	20.1495	14.2996
1699	17.8746	12.0247	12.9997	10.7247	14.2996	11.6997	12.0247	14.9496	19.8245	13.9747
1700	18.1995	12.3497	13.6497	10.7247	14.6246	11.0497	12.6747	15.2746	19.8245	13.9747
1701	17.8746	12.0247	13.6497	11.0497	13.9747	11.0497	12.6747	15.2746	19.8245	14.2996
1702	17.8746	11.6997	13.3247	11.0497	14.2996	11.3747	12.3497	15.2746	19.8245	13.9747
1703	17.5496	11.6997	13.9747	10.7247	14.6246	11.0497	12.6747	15.2746	19.4995	13.9747
1704	17.5496	12.0247	12.9997	10.7247	14.2996	11.3747	13.6497	14.9496	19.8245	13.9747
1705	18.5245	12.0247	12.9997	10.7247	14.6246	11.3747	12.3497	15.2746	19.8245	14.2996
1706	17.8746	12.3497	13.3247	10.7247	14.2996	11.3747	12.6747	15.2746	20.1495	14.2996
1707	17.8746	12.0247	12.6747	10.7247	14.2996	11.3747	12.3497	14.9496	19.4995	14.2996
1708	18.1995	11.6997	13.9747	11.0497	14.2996	11.3747	13.3247	14.9496	19.8245	13.9747
1709	17.5496	12.0247	13.6497	10.7247	14.2996	11.0497	12.9997	14.9496	20.1495	13.9747
1710	17.5496	12.3497	13.6497	10.7247	14.2996	11.0497	12.6747	15.2746	19.8245	14.2996
1711	17.8746	11.6997	12.6747	11.0497	14.2996	11.3747	12.9997	15.2746	20.1495	14.2996
1712	18.1995	12.0247	12.9997	10.3997	14.2996	11.3747	12.3497	15.2746	19.8245	13.9747
1713	17.5496	11.6997	12.9997	10.3997	14.2996	11.0497	12.0247	15.2746	19.8245	14.2996
1714	17.8746	12.3497	13.6497	10.3997	14.2996	11.3747	12.6747	14.9496	19.8245	14.2996
1715	17.2246	12.3497	13.3247	11.0497	14.2996	11.0497	12.0247	15.2746	19.4995	13.9747
1716	16.8996	12.0247	12.3497	10.7247	14.6246	11.0497	12.9997	15.2746	19.8245	13.9747
1717	17.8746	12.0247	12.6747	10.7247	13.9747	11.0497	12.3497	14.9496	20.4745	13.6497
1718	18.1995	11.6997	12.6747	11.0497	14.2996	11.0497	12.3497	15.2746	19.8245	13.9747
1719	16.8996	11.6997	12.6747	11.0497	14.2996	11.3747	12.3497	14.9496	19.8245	14.2996
1720	17.2246	12.3497	12.3497	10.7247	14.6246	11.3747	12.6747	14.9496	19.8245	13.9747
1721	17.8746	11.6997	13.9747	10.7247	13.9747	11.0497	12.9997	14.9496	19.8245	14.2996
1722	19.1745	12.0247	13.3247	10.7247	14.2996	11.3747	12.3497	14.9496	19.8245	14.2996
1723	18.1995	12.0247	12.9997	10.7247	13.9747	11.0497	12.9997	14.9496	19.8245	13.9747
1724	17.2246	12.3497	12.9997	10.7247	14.2996	11.3747	12.9997	15.2746	19.8245	14.2996
1725	17.2246	12.0247	12.9997	10.7247	14.6246	11.0497	12.3497	14.9496	20.1495	13.6497
1726	17.5496	12.0247	13.3247	11.0497	14.6246	11.0497	12.3497	14.9496	20.4745	14.2996
1727	17.5496	12.3497	12.9997	11.0497	14.2996	11.3747	12.6747	15.2746	19.8245	14.2996
1728	19.1745	12.3497	13.3247	11.0497	14.2996	11.0497	13.3247	14.9496	19.8245	13.9747
1729	17.8746	11.6997	12.9997	10.7247	14.2996	11.3747	12.9997	15.2746	20.1495	14.2996
1730	17.5496	11.6997	12.9997	10.7247	14.9496	11.3747	12.6747	15.2746	19.4995	14.2996
1731	17.5496	12.0247	13.3247	10.7247	14.2996	11.3747	12.9997	15.2746	20.1495	13.6497
1732	17.2246	12.0247	13.6497	11.0497	14.6246	11.3747	12.6747	15.2746	20.1495	13.6497
1733	18.1995	12.0247	13.3247	10.7247	14.2996	11.3747	12.3497	14.9496	19.8245	13.9747
1734	17.5496	11.6997	12.6747	10.7247	14.2996	11.3747	12.6747	14.9496	20.1495	13.9747
1735	17.8746	12.0247	12.9997	10.7247	14.6246	11.3747	12.3497	14.9496	20.1495	13.9747
1736	17.5496	12.3497	12.9997	10.3997	14.6246	11.3747	12.6747	14.9496	19.8245	13.9747
1737	17.5496	12.0247	13.3247	10.7247	14.2996	11.0497	12.9997	14.9496	20.1495	13.9747
1738	17.8746	12.0247	13.6497	10.7247	14.2996	11.3747	12.6747	14.9496	19.8245	14.2996
1739	17.5496	12.3497	12.9997	10.7247	14.2996	11.3747	12.3497	14.9496	20.1495	14.2996
1740	17.8746	12.0247	13.3247	10.3997	14.2996	11.3747	12.3497	14.9496	20.1495	13.9747
1741	17.8746	12.0247	12.9997	10.7247	14.2996	11.3747	12.6747	14.9496	20.1495	14.2996
1742	17.2246	12.0247	13.3247	10.7247	14.2996	11.3747	12.3497	14.9496	20.1495	13.9747
1743	17.8746	12.3497	13.6497	10.7247	14.2996	11.3747	12.6747	14.9496	20.1495	13.9747
1744	17.2246	11.6997	13.3247	10.7247	14.6246	11.3747	12.6747	14.9496	20.1495	14.2996
1745	17.2246	12.0247	12.0247	10.7247	14.6246	11.0497	12.6747	14.9496	19.8245	13.9747
1746	17.5496	11.6997	12.3497	11.0497	14.6246	11.0497	12.6747	15.2746	20.1495	13.6497
1747	18.8495	11.6997	12.6747	10.7247	14.6246	11.3747	12.9997	14.9496	20.1495	14.2996
1748	17.2246	12.0247	12.6747	10.7247	14.2996	11.0497	12.6747	14.9496	19.1745	13.9747
1749	16.8996	11.0497	12.9997	10.7247	14.6246	11.0497	12.9997	15.2746	20.1495	14.2996
1750	17.2246	12.0247	12.9997	10.7247	14.6246	11.0497	12.6747	15.2746	20.4745	14.2996
1751	17.2246	12.3497	12.9997	10.7247	14.2996	11.3747	12.3497	14.9496	20.1495	13.9747
1752	17.2246	12.0247	12.3497	11.0497	14.6246	11.3747	12.6747	14.9496	20.1495	13.9747
1753	17.8746	12.3497	12.3497	10.7247	14.2996	11.0497	12.3497	15.2746	19.8245	14.2996
1754	18.1995	12.0247	12.3497	10.3997	14.2996	11.0497	12.3497	14.9496	20.1495	13.9747
1755	17.8746	12.0247	12.3497	10.7247	13.9747	11.0497	12.3497	14.9496	20.1495	14.2996
1756	16.8996	11.6997	12.6747	10.7247	13.9747	11.0497	12.3497	15.2746	19.8245	13.9747
1757	17.2246	12.0247	12.9997	10.7247	14.2996	11.0497	12.6747	14.9496	19.8245	13.9747
1758	17.2246	11.6997	12.0247	11.0497	14.2996	11.3747	12.6747	14.9496	19.8245	13.6497
1759	17.5496	11.6997	12.0247	10.7247	14.2996	11.0497	11.6997	14.9496	19.4995	14.2996
1760	17.5496	12.6747	12.6747	11.0497	14.2996	11.3747	12.3497	14.9496	19.8245	14.2996
1761	17.2246	12.0247	12.0247	10.7247	14.6246	11.3747	12.6747	14.9496	19.4995	13.9747
1762	16.8996	12.0247	12.6747	10.7247	14.2996	11.3747	12.9997	14.9496	19.4995	13.9747
1763	17.5496	12.0247	12.0247	10.7247	14.2996	11.3747	12.0247	15.2746	19.8245	13.9747
1764	16.8996	12.0247	12.3497	10.7247	14.2996	11.3747	12.6747	15.2746	19.4995	13.9747
1765	17.2246	11.6997	12.0247	10.7247	14.2996	11.3747	12.9997	14.9496	19.4995	13.6497
1766	18.1995	11.6997	13.6497	10.3997	14.6246	11.3747	12.6747	14.9496	19.8245	14.2996
1767	17.5496	12.0247	12.6747	10.3997	14.2996	11.0497	12.6747	14.9496	19.4995	14.2996
1768	17.8746	11.6997	12.3497	10.7247	14.2996	11.3747	12.3497	14.9496	19.4995	13.9747
1769	17.2246	11.6997	12.0247	10.7247	14.2996	11.0497	12.6747	14.9496	19.4995	14.2996
1770	17.5496	12.0247	12.3497	10.7247	14.2996	11.0497	12.6747	15.2746	20.1495	14.2996
1771	17.5496	11.6997	12.6747	10.7247	14.6246	11.3747	12.0247	14.9496	19.4995	14.2996
1772	19.1745	12.0247	12.3497	11.0497	14.2996	11.3747	12.9997	15.2746	19.4995	14.2996
1773	18.8495	12.0247	12.9997	10.7247	14.6246	11.3747	12.3497	15.2746	20.1495	14.2996
1774	18.1995	11.6997	12.3497	10.7247	13.9747	11.0497	12.0247	15.2746	19.8245	13.9747
1775	16.8996	12.0247	12.9997	10.7247	13.9747	11.0497	12.0247	15.2746	19.8245	14.2996
1776	17.8746	12.0247	12.9997	10.7247	14.6246	11.3747	12.0247	14.9496	20.1495	14.2996
1777	17.2246	12.0247	13.6497	10.7247	13.9747	11.3747	12.6747	15.2746	20.1495	14.2996
1778	15.9246	12.3497	13.9747	10.7247	14.6246	11.0497	12.0247	15.2746	19.8245	14.2996
1779	17.2246	12.0247	13.3247	10.7247	14.2996	11.3747	12.3497	15.2746	20.1495	14.2996
1780	16.8996	12.0247	14.2996	10.3997	13.9747	11.3747	12.0247	15.2746	19.8245	13.6497
1781	16.8996	12.0247	13.9747	10.7247	14.2996	11.3747	12.0247	15.2746	19.8245	13.9747
1782	16.8996	11.6997	12.6747	10.7247	14.6246	11.3747	12.0247	14.9496	20.1495	13.9747
1783	16.5746	12.0247	12.9997	10.3997	13.9747	11.3747	12.3497	15.2746	20.1495	13.9747
1784	17.5496	11.6997	12.9997	10.3997	14.2996	11.3747	12.9997	15.2746	19.8245	13.9747
1785	17.8746	12.0247	12.9997	10.7247	14.2996	11.3747	12.6747	14.9496	19.4995	13.9747
1786	16.8996	12.0247	13.3247	10.7247	14.2996	11.3747	12.3497	14.9496	20.1495	14.2996
1787	17.8746	12.0247	12.6747	10.7247	14.2996	11.3747	12.3497	14.9496	19.8245	13.9747
1788	16.2496	12.0247	12.6747	10.3997	14.6246	11.0497	12.6747	14.9496	19.8245	13.9747
1789	17.5496	11.6997	12.9997	10.7247	14.2996	11.3747	12.0247	14.9496	20.1495	13.9747
1790	16.8996	12.0247	12.3497	10.7247	14.2996	11.0497	12.6747	14.9496	20.1495	13.6497
1791	16.8996	12.0247	12.6747	10.3997	14.2996	11.3747	12.0247	15.2746	20.1495	13.9747
1792	17.2246	11.6997	12.9997	10.3997	14.2996	11.0497	12.0247	14.9496	20.1495	14.2996
1793	16.5746	11.6997	12.3497	10.3997	14.2996	11.3747	12.3497	15.2746	20.1495	13.9747
1794	16.8996	12.0247	12.3497	10.3997	14.2996	11.3747	12.9997	14.9496	19.8245	13.9747
1795	17.2246	12.0247	12.3497	10.7247	13.9747	11.0497	12.3497	15.2746	20.1495	14.2996
1796	16.8996	11.6997	14.2996	10.3997	14.2996	11.3747	12.3497	14.9496	20.1495	13.6497
1797	16.8996	12.3497	12.6747	10.3997	13.9747	11.0497	12.6747	14.9496	20.1495	13.9747
1798	16.8996	12.0247	12.6747	10.7247	13.9747	11.3747	12.3497	14.9496	19.8245	14.2996
1799	16.8996	12.0247	12.9997	10.7247	14.2996	11.3747	12.6747	14.9496	19.4995	13.6497

## Sheet: 5Hz
Stimulation
Time (s)	BGBV-199	BGBV-202	BGBV-207	BGBV-211	BGBV-214	BGBV-223
0	20.4745	12.9997	20.7995	10.7247	12.3497	12.6747
1	20.4745	12.9997	20.7995	11.3747	12.9997	12.6747
2	20.7995	12.6747	20.7995	11.0497	12.9997	12.6747
3	20.7995	12.9997	20.7995	11.3747	12.9997	12.3497
4	20.4745	12.9997	21.1245	11.0497	12.9997	12.6747
5	20.4745	12.6747	21.1245	11.0497	12.9997	12.6747
6	20.4745	12.6747	20.7995	10.7247	12.9997	12.3497
7	20.4745	12.6747	20.7995	11.0497	12.6747	12.6747
8	20.7995	12.6747	21.1245	11.3747	12.9997	12.0247
9	20.1495	13.3247	21.1245	10.7247	12.9997	12.3497
10	20.7995	13.3247	20.7995	10.3997	12.9997	12.0247
11	20.7995	13.3247	21.7745	11.3747	12.6747	12.3497
12	20.4745	12.9997	20.7995	11.0497	12.6747	12.3497
13	20.4745	12.9997	20.4745	10.7247	12.9997	12.6747
14	20.4745	13.3247	21.4495	10.7247	12.9997	12.6747
15	20.7995	12.9997	21.1245	11.0497	12.9997	12.6747
16	20.4745	12.6747	21.1245	11.0497	12.9997	12.6747
17	20.4745	12.9997	20.7995	11.0497	12.9997	12.3497
18	20.1495	13.3247	21.1245	11.0497	12.9997	12.3497
19	20.4745	12.6747	21.4495	11.0497	12.9997	12.6747
20	20.4745	13.3247	20.7995	11.0497	12.9997	12.6747
21	20.7995	12.9997	21.1245	11.0497	12.9997	12.6747
22	20.4745	12.6747	21.1245	10.7247	12.9997	12.3497
23	20.4745	12.9997	20.7995	11.0497	12.9997	12.0247
24	20.7995	12.6747	20.7995	11.0497	12.9997	12.6747
25	20.7995	12.6747	21.1245	10.7247	12.9997	12.6747
26	20.7995	12.6747	21.1245	10.3997	12.9997	12.3497
27	20.4745	12.9997	21.4495	10.7247	12.9997	12.6747
28	20.7995	12.6747	21.1245	10.7247	12.9997	12.3497
29	20.4745	12.9997	21.1245	10.3997	12.9997	12.3497
30	20.1495	12.9997	21.1245	11.0497	12.9997	12.6747
31	20.4745	12.9997	21.1245	10.7247	12.9997	12.6747
32	20.7995	12.6747	20.7995	10.7247	12.9997	12.3497
33	20.7995	12.9997	20.4745	11.0497	12.6747	12.6747
34	20.4745	12.9997	21.7745	10.7247	12.9997	12.6747
35	20.1495	12.9997	21.1245	10.7247	12.9997	12.6747
36	20.4745	12.9997	21.1245	10.7247	12.9997	12.6747
37	20.1495	12.9997	21.1245	10.7247	12.9997	12.9997
38	20.4745	12.9997	21.4495	10.7247	13.3247	12.3497
39	20.4745	12.9997	21.4495	10.7247	12.9997	12.6747
40	20.4745	12.9997	21.7745	11.0497	12.9997	12.3497
41	20.7995	13.3247	21.1245	11.0497	12.9997	12.3497
42	20.4745	12.9997	21.1245	10.7247	12.6747	12.6747
43	20.4745	12.6747	21.1245	11.0497	12.9997	12.0247
44	20.4745	12.9997	21.7745	11.0497	12.6747	12.3497
45	20.1495	12.9997	21.1245	10.7247	13.3247	12.3497
46	20.4745	12.6747	22.0994	11.0497	13.3247	12.6747
47	20.1495	12.3497	21.4495	11.0497	12.9997	12.3497
48	20.4745	12.6747	21.7745	10.7247	12.9997	12.3497
49	20.4745	12.9997	21.7745	10.7247	12.3497	12.3497
50	20.4745	12.3497	21.7745	11.0497	12.9997	12.3497
51	20.1495	12.9997	22.0994	10.7247	12.6747	12.6747
52	20.1495	12.9997	21.4495	11.0497	12.3497	12.3497
53	20.4745	12.6747	21.7745	11.0497	12.3497	12.6747
54	20.1495	12.9997	21.7745	11.0497	12.6747	12.3497
55	20.4745	12.9997	22.4244	11.0497	12.6747	12.3497
56	20.4745	12.9997	22.4244	11.0497	12.3497	12.6747
57	20.4745	12.6747	22.0994	11.0497	12.6747	12.3497
58	20.1495	12.6747	21.4495	10.7247	12.6747	12.9997
59	20.1495	12.6747	21.7745	11.0497	12.6747	12.3497
60	20.4745	12.9997	21.7745	10.7247	12.3497	12.3497
61	20.4745	12.6747	21.7745	10.7247	12.6747	12.3497
62	20.1495	12.6747	21.7745	10.7247	12.6747	12.3497
63	20.4745	12.9997	22.4244	10.7247	12.3497	12.3497
64	20.4745	12.6747	22.4244	11.3747	12.6747	12.6747
65	20.4745	12.6747	22.0994	10.7247	12.9997	12.3497
66	20.1495	12.6747	21.7745	11.0497	12.9997	12.3497
67	20.4745	12.6747	22.0994	11.0497	12.3497	12.3497
68	20.4745	12.9997	22.4244	11.0497	12.9997	12.3497
69	20.4745	12.3497	21.4495	10.7247	12.6747	12.3497
70	20.4745	12.6747	22.4244	11.0497	12.9997	12.3497
71	20.4745	13.3247	22.0994	10.7247	12.9997	12.3497
72	20.4745	12.6747	22.4244	10.7247	12.9997	12.3497
73	20.4745	12.9997	22.4244	10.7247	12.6747	12.6747
74	20.4745	12.6747	21.7745	11.0497	12.6747	12.3497
75	20.4745	12.9997	21.7745	10.7247	12.9997	12.3497
76	20.4745	12.9997	22.0994	11.6997	12.6747	12.6747
77	20.4745	12.9997	21.7745	11.3747	12.6747	12.6747
78	20.4745	12.6747	22.4244	11.0497	12.3497	12.9997
79	20.4745	12.6747	22.0994	10.7247	12.3497	12.3497
80	20.4745	12.6747	22.0994	10.7247	12.0247	12.6747
81	20.4745	12.6747	21.7745	11.0497	12.0247	12.3497
82	20.4745	12.9997	22.4244	11.0497	12.0247	12.6747
83	20.4745	12.9997	21.4495	10.3997	12.3497	12.3497
84	20.4745	12.6747	21.7745	11.0497	12.3497	12.6747
85	20.4745	12.6747	21.7745	10.7247	12.3497	12.3497
86	20.4745	13.3247	21.4495	11.0497	12.3497	12.6747
87	20.4745	12.9997	21.4495	10.7247	12.0247	12.3497
88	20.4745	12.9997	21.4495	11.0497	12.0247	12.6747
89	20.4745	12.6747	22.0994	10.7247	12.0247	12.3497
90	20.4745	12.9997	21.4495	11.0497	12.0247	12.0247
91	20.4745	12.9997	22.4244	10.7247	12.3497	12.0247
92	20.4745	12.6747	21.7745	10.7247	12.3497	12.6747
93	20.4745	12.6747	22.4244	10.7247	12.3497	12.3497
94	20.1495	13.3247	21.7745	11.0497	12.3497	12.6747
95	20.4745	12.9997	21.7745	10.3997	12.3497	12.3497
96	20.4745	12.6747	22.4244	10.3997	12.3497	12.3497
97	20.4745	12.3497	22.0994	11.0497	12.3497	12.3497
98	20.4745	12.6747	22.0994	11.0497	12.3497	12.3497
99	20.4745	12.6747	22.0994	10.7247	12.3497	12.3497
100	20.4745	12.6747	21.7745	10.7247	12.0247	12.3497
101	20.4745	12.6747	22.0994	10.7247	12.3497	12.3497
102	20.7995	12.6747	22.4244	11.0497	12.3497	12.3497
103	20.7995	12.6747	22.0994	10.7247	12.0247	12.3497
104	20.1495	12.6747	21.7745	10.3997	12.3497	12.3497
105	20.4745	12.6747	22.7494	11.0497	12.3497	12.3497
106	20.1495	12.6747	21.7745	10.7247	12.3497	12.3497
107	20.7995	12.9997	22.7494	10.3997	12.3497	12.3497
108	20.4745	12.6747	22.0994	11.0497	12.3497	12.3497
109	20.4745	12.9997	21.7745	11.0497	12.3497	12.3497
110	20.1495	13.3247	22.4244	10.7247	12.3497	12.6747
111	20.4745	12.9997	21.7745	10.3997	12.3497	12.6747
112	20.4745	12.9997	22.0994	10.3997	12.3497	12.3497
113	20.7995	12.9997	22.0994	10.7247	12.0247	12.0247
114	20.7995	12.9997	21.7745	10.3997	12.3497	12.6747
115	20.1495	12.9997	21.7745	10.7247	12.3497	12.3497
116	20.4745	13.3247	21.7745	10.7247	12.3497	12.3497
117	20.7995	12.6747	22.4244	10.7247	12.3497	12.6747
118	20.4745	12.9997	21.7745	11.0497	12.3497	12.3497
119	20.7995	12.6747	21.4495	10.3997	12.3497	12.9997
120	20.7995	12.6747	22.0994	10.7247	12.6747	12.3497
121	20.4745	12.9997	22.7494	10.7247	12.6747	12.3497
122	20.4745	12.9997	21.7745	11.0497	12.6747	12.3497
123	20.1495	12.6747	22.4244	11.0497	12.6747	12.3497
124	20.4745	12.9997	22.4244	11.3747	12.9997	12.3497
125	20.1495	12.3497	21.7745	11.0497	12.9997	12.3497
126	20.4745	12.9997	22.0994	10.7247	12.9997	12.3497
127	20.4745	12.6747	22.0994	11.0497	12.9997	12.3497
128	20.4745	12.6747	22.0994	11.0497	12.9997	12.6747
129	20.4745	12.6747	23.3994	11.0497	12.9997	12.0247
130	20.4745	12.3497	22.0994	10.7247	12.9997	12.6747
131	20.1495	12.3497	22.4244	11.3747	12.9997	12.0247
132	20.4745	12.3497	22.4244	11.0497	12.6747	12.0247
133	20.1495	12.6747	22.0994	11.0497	12.6747	12.3497
134	20.4745	12.3497	22.0994	11.3747	12.6747	12.3497
135	20.4745	12.6747	22.4244	11.0497	12.6747	12.3497
136	20.4745	12.6747	22.0994	11.0497	12.6747	12.6747
137	20.4745	12.6747	22.0994	10.7247	12.6747	12.6747
138	20.4745	12.6747	22.7494	11.0497	12.6747	12.3497
139	20.4745	12.6747	22.4244	10.7247	12.6747	12.3497
140	20.1495	12.6747	21.7745	11.0497	12.6747	12.3497
141	20.4745	12.3497	21.7745	11.0497	12.6747	12.6747
142	20.7995	12.6747	21.4495	11.3747	12.6747	12.3497
143	20.4745	12.0247	21.4495	11.0497	12.6747	12.3497
144	20.4745	11.6997	21.7745	11.3747	12.6747	12.3497
145	20.4745	12.3497	21.4495	10.7247	12.6747	12.0247
146	20.4745	12.3497	21.4495	11.0497	12.6747	12.3497
147	20.4745	11.6997	21.4495	10.7247	12.9997	12.3497
148	20.4745	12.6747	21.4495	11.0497	12.6747	12.3497
149	20.4745	12.3497	21.1245	11.0497	12.6747	12.3497
150	20.7995	12.3497	21.4495	10.7247	12.6747	12.6747
151	20.1495	12.3497	21.7745	10.7247	12.3497	12.3497
152	20.4745	12.6747	21.7745	10.7247	12.6747	12.3497
153	20.1495	12.3497	21.4495	10.7247	12.6747	12.6747
154	20.4745	12.3497	21.4495	10.7247	12.6747	12.3497
155	20.4745	11.6997	21.4495	11.0497	12.6747	12.3497
156	20.4745	12.3497	22.0994	11.0497	12.3497	12.6747
157	20.7995	12.3497	21.7745	10.7247	12.3497	12.3497
158	20.4745	12.3497	21.4495	11.0497	12.6747	12.3497
159	20.4745	12.6747	21.4495	11.0497	12.6747	12.3497
160	20.4745	12.0247	22.0994	11.3747	12.6747	12.6747
161	20.4745	12.9997	22.7494	11.0497	12.6747	12.3497
162	20.4745	12.3497	21.7745	11.3747	12.6747	12.6747
163	20.4745	12.3497	22.0994	11.3747	12.6747	12.6747
164	20.4745	12.6747	21.7745	11.0497	12.6747	12.3497
165	20.4745	12.0247	21.7745	11.3747	12.6747	12.0247
166	20.4745	12.3497	21.7745	10.7247	12.6747	12.3497
167	20.4745	12.3497	21.4495	11.0497	12.6747	12.3497
168	20.4745	12.0247	21.4495	11.0497	12.6747	12.3497
169	20.4745	12.6747	21.7745	11.0497	12.6747	12.3497
170	20.1495	12.3497	22.4244	11.3747	12.6747	12.3497
171	20.4745	12.6747	22.0994	10.7247	12.6747	12.6747
172	20.4745	12.3497	21.7745	11.0497	12.6747	12.3497
173	20.4745	12.3497	21.4495	11.0497	12.6747	12.3497
174	20.4745	12.3497	21.7745	11.3747	12.6747	12.3497
175	20.4745	12.3497	22.0994	11.0497	12.6747	12.3497
176	20.4745	12.3497	22.7494	11.3747	12.6747	12.6747
177	20.1495	12.3497	22.4244	10.7247	12.6747	12.3497
178	20.4745	12.6747	22.0994	10.7247	12.6747	12.6747
179	20.4745	12.6747	22.7494	11.3747	12.6747	12.3497
180	20.4745	12.3497	23.0744	11.0497	12.6747	12.6747
181	20.4745	12.6747	21.7745	11.3747	12.6747	12.3497
182	20.4745	12.6747	22.0994	11.3747	12.6747	12.3497
183	20.7995	12.6747	22.4244	10.7247	12.6747	12.3497
184	20.4745	12.6747	22.4244	11.3747	12.6747	12.6747
185	20.4745	12.6747	22.0994	11.3747	12.6747	12.6747
186	20.4745	12.0247	22.4244	11.0497	12.6747	12.3497
187	20.4745	12.9997	21.7745	11.3747	12.6747	12.6747
188	20.4745	12.3497	22.0994	11.0497	12.6747	12.3497
189	20.1495	12.9997	21.7745	11.0497	12.6747	12.3497
190	20.4745	12.3497	22.4244	11.0497	12.6747	12.6747
191	20.4745	12.3497	21.7745	11.3747	12.6747	12.6747
192	20.4745	12.6747	22.7494	11.3747	12.6747	12.6747
193	20.4745	12.6747	21.7745	11.0497	12.6747	12.6747
194	20.7995	12.6747	22.4244	11.0497	12.6747	12.3497
195	20.7995	12.3497	22.4244	10.7247	12.6747	12.3497
196	20.4745	12.3497	22.0994	11.0497	12.6747	12.6747
197	20.1495	12.6747	22.0994	11.3747	12.6747	12.6747
198	20.7995	12.3497	22.4244	11.0497	12.9997	12.6747
199	20.7995	12.6747	22.0994	10.7247	12.6747	12.6747
200	20.4745	12.6747	21.7745	11.0497	12.9997	12.3497
201	20.4745	12.6747	22.7494	11.0497	12.6747	12.6747
202	20.7995	12.6747	22.4244	11.0497	12.6747	12.3497
203	20.4745	12.6747	23.0744	11.0497	12.9997	12.3497
204	20.4745	12.3497	21.4495	11.3747	12.9997	12.6747
205	20.4745	12.3497	21.7745	11.0497	12.9997	12.6747
206	20.4745	12.6747	22.0994	11.0497	12.9997	12.3497
207	20.7995	12.6747	23.0744	10.3997	12.9997	12.3497
208	20.4745	12.6747	22.0994	11.0497	12.6747	12.3497
209	20.4745	12.9997	22.7494	11.0497	12.9997	12.6747
210	20.1495	12.9997	22.7494	10.7247	12.6747	12.6747
211	20.4745	12.6747	22.4244	11.3747	12.6747	12.3497
212	20.4745	12.6747	22.7494	10.7247	12.9997	12.3497
213	20.4745	12.9997	21.7745	11.3747	12.9997	12.3497
214	20.4745	12.3497	23.0744	11.0497	12.9997	12.6747
215	20.4745	12.3497	22.4244	11.0497	12.6747	12.6747
216	20.4745	12.6747	22.0994	11.0497	12.6747	12.9997
217	20.4745	12.3497	22.4244	11.3747	12.9997	12.6747
218	20.4745	12.3497	21.7745	11.0497	12.9997	12.6747
219	20.7995	12.6747	21.7745	11.0497	12.9997	12.3497
220	20.4745	12.9997	22.4244	11.3747	12.6747	12.3497
221	20.1495	12.3497	22.0994	10.7247	12.6747	12.6747
222	20.4745	12.3497	22.0994	11.0497	12.6747	12.3497
223	20.4745	12.6747	22.4244	11.0497	12.6747	12.6747
224	20.4745	12.3497	22.7494	11.0497	12.6747	12.3497
225	20.4745	12.3497	22.4244	10.7247	12.6747	12.6747
226	20.4745	12.6747	22.0994	11.6997	12.6747	12.3497
227	20.4745	12.6747	22.4244	11.0497	12.6747	12.3497
228	20.4745	12.3497	22.0994	10.7247	12.6747	12.6747
229	20.1495	12.3497	22.0994	11.3747	12.9997	12.3497
230	20.4745	12.0247	22.0994	11.0497	12.9997	12.6747
231	20.4745	12.3497	22.0994	11.0497	12.9997	12.6747
232	20.4745	12.3497	22.4244	10.7247	12.9997	12.3497
233	20.4745	12.6747	22.0994	11.0497	12.6747	12.6747
234	20.1495	12.6747	21.4495	11.0497	12.6747	12.6747
235	20.1495	12.6747	21.7745	11.3747	12.6747	12.3497
236	20.1495	12.6747	22.4244	10.7247	12.9997	12.3497
237	20.1495	12.3497	22.4244	11.0497	12.6747	12.3497
238	20.4745	12.3497	22.7494	11.0497	12.9997	12.6747
239	20.1495	12.3497	22.4244	11.3747	12.6747	12.3497
240	20.1495	12.3497	22.0994	11.0497	12.6747	12.3497
241	20.1495	12.3497	22.4244	11.0497	12.9997	12.0247
242	20.1495	12.6747	22.0994	11.0497	12.6747	12.6747
243	20.4745	12.6747	22.4244	11.0497	12.9997	12.6747
244	20.1495	12.3497	22.4244	11.3747	12.9997	12.3497
245	20.1495	12.9997	21.7745	10.7247	12.9997	12.6747
246	20.1495	12.6747	22.7494	11.0497	12.9997	12.3497
247	20.4745	12.9997	22.7494	11.3747	12.6747	12.6747
248	20.1495	12.3497	22.0994	11.0497	12.9997	12.3497
249	20.1495	12.6747	22.4244	10.7247	12.9997	12.6747
250	20.1495	12.3497	22.0994	11.0497	12.9997	12.3497
251	20.1495	12.0247	22.4244	10.3997	12.9997	12.6747
252	20.4745	12.6747	22.4244	11.3747	12.9997	12.6747
253	20.1495	12.3497	22.4244	11.0497	12.9997	12.3497
254	20.1495	12.3497	22.0994	11.0497	12.9997	12.6747
255	20.4745	12.6747	21.7745	11.0497	12.9997	12.6747
256	20.4745	12.3497	23.0744	11.0497	12.9997	12.3497
257	20.1495	12.6747	22.4244	11.3747	12.9997	12.6747
258	20.1495	12.6747	22.4244	10.7247	12.9997	12.6747
259	20.1495	12.6747	22.4244	10.7247	12.9997	12.3497
260	20.4745	12.6747	22.4244	10.3997	12.9997	12.6747
261	20.4745	12.3497	22.0994	11.0497	12.9997	12.3497
262	20.4745	12.6747	22.0994	11.0497	12.9997	12.3497
263	20.1495	12.6747	22.0994	11.0497	12.9997	12.6747
264	20.4745	12.6747	22.0994	11.0497	12.9997	12.6747
265	19.8245	12.3497	22.7494	11.0497	12.9997	12.3497
266	20.1495	12.6747	22.7494	11.3747	12.9997	12.3497
267	19.8245	12.6747	23.0744	10.7247	12.9997	12.6747
268	20.4745	12.9997	22.0994	10.7247	12.9997	12.3497
269	20.4745	12.6747	22.4244	11.3747	12.9997	12.3497
270	20.4745	12.9997	22.0994	10.3997	12.9997	12.6747
271	20.1495	12.3497	22.4244	11.0497	12.9997	12.3497
272	19.8245	12.9997	23.7244	11.0497	12.9997	12.3497
273	20.1495	12.6747	22.4244	11.0497	12.9997	12.6747
274	20.4745	12.6747	22.4244	10.7247	12.9997	12.3497
275	20.1495	12.3497	23.0744	11.0497	12.9997	12.6747
276	19.8245	12.6747	22.4244	10.7247	12.6747	12.3497
277	20.1495	12.6747	22.4244	11.0497	12.6747	12.0247
278	20.1495	12.6747	22.0994	11.0497	12.9997	12.6747
279	20.1495	12.6747	22.4244	11.0497	12.6747	12.0247
280	20.4745	12.3497	22.4244	11.3747	12.9997	12.3497
281	20.1495	12.3497	22.7494	11.0497	12.9997	12.6747
282	20.4745	12.3497	21.7745	11.0497	12.9997	12.6747
283	20.4745	12.6747	23.3994	11.3747	12.9997	12.6747
284	20.1495	12.3497	22.0994	11.0497	12.6747	12.6747
285	20.1495	12.6747	22.0994	10.7247	12.9997	12.6747
286	20.4745	12.3497	22.0994	10.7247	12.6747	12.3497
287	20.4745	12.3497	22.7494	11.3747	12.6747	12.3497
288	20.1495	12.3497	23.0744	11.0497	12.6747	12.6747
289	20.4745	12.6747	22.4244	10.7247	12.6747	12.3497
290	20.4745	12.3497	23.3994	11.0497	12.6747	12.0247
291	20.4745	12.3497	22.7494	11.6997	12.6747	12.3497
292	20.1495	12.6747	22.4244	11.6997	12.9997	12.3497
293	20.1495	12.3497	23.0744	10.7247	12.6747	12.3497
294	20.1495	12.3497	22.7494	11.0497	12.6747	12.3497
295	20.1495	12.3497	23.3994	11.0497	12.6747	12.3497
296	20.1495	12.6747	22.7494	11.0497	12.6747	12.3497
297	20.1495	12.6747	22.7494	11.0497	12.6747	12.0247
298	20.4745	12.3497	22.7494	11.3747	12.6747	12.6747
299	20.4745	12.9997	22.4244	11.0497	12.9997	12.6747
300	20.1495	12.6747	22.4244	11.0497	12.6747	12.6747
301	20.1495	12.6747	22.4244	11.0497	12.6747	12.3497
302	20.4745	12.3497	23.3994	11.0497	12.9997	12.6747
303	20.1495	12.9997	22.7494	11.3747	12.6747	12.0247
304	20.1495	12.9997	22.4244	11.0497	12.6747	12.6747
305	20.1495	12.3497	22.7494	11.0497	12.6747	12.3497
306	20.1495	12.3497	23.0744	11.0497	12.3497	12.6747
307	20.1495	12.9997	22.7494	11.0497	12.6747	12.6747
308	20.1495	12.9997	23.7244	11.0497	12.6747	12.3497
309	20.7995	12.6747	23.0744	10.7247	12.6747	12.6747
310	20.1495	12.6747	23.0744	11.0497	12.9997	12.6747
311	20.1495	12.6747	22.7494	11.0497	12.6747	12.3497
312	20.1495	12.6747	23.0744	10.7247	12.6747	12.3497
313	20.1495	12.6747	23.7244	11.3747	12.9997	12.3497
314	20.1495	12.6747	24.0494	11.6997	12.6747	12.3497
315	20.1495	12.9997	23.3994	11.3747	12.9997	12.3497
316	20.1495	12.3497	23.0744	11.0497	12.6747	12.6747
317	20.1495	12.3497	23.3994	11.0497	12.9997	12.3497
318	20.1495	12.3497	24.0494	11.0497	12.6747	12.3497
319	20.1495	12.6747	23.3994	11.6997	12.9997	12.3497
320	20.1495	12.6747	22.7494	10.7247	12.6747	12.3497
321	20.4745	12.3497	22.4244	11.0497	12.6747	11.6997
322	20.1495	12.0247	22.7494	11.0497	12.6747	12.3497
323	20.4745	12.6747	22.7494	11.0497	12.6747	12.3497
324	20.1495	12.6747	22.4244	11.0497	12.6747	12.6747
325	20.1495	12.3497	22.7494	11.3747	12.6747	12.0247
326	20.4745	12.3497	23.3994	11.3747	12.6747	12.3497
327	20.4745	12.3497	23.0744	11.0497	12.6747	12.6747
328	20.1495	12.6747	23.7244	11.0497	12.3497	12.6747
329	20.1495	12.6747	22.4244	10.3997	12.3497	12.3497
330	20.1495	12.6747	23.0744	11.0497	12.6747	12.3497
331	20.1495	12.6747	24.0494	11.0497	12.6747	12.3497
332	20.1495	12.6747	23.3994	11.0497	12.6747	12.3497
333	20.4745	12.3497	23.3994	11.0497	12.3497	12.3497
334	20.4745	12.0247	23.3994	10.7247	12.3497	12.3497
335	20.1495	12.0247	22.0994	11.0497	12.6747	12.0247
336	20.1495	12.3497	22.7494	11.3747	12.9997	12.0247
337	20.1495	12.0247	22.7494	11.3747	12.6747	12.0247
338	20.1495	12.0247	22.4244	10.7247	12.6747	12.3497
339	20.4745	12.0247	23.3994	11.0497	12.9997	12.3497
340	20.4745	12.0247	24.0494	10.7247	12.9997	12.3497
341	20.4745	12.0247	23.0744	11.3747	12.3497	12.3497
342	20.4745	12.0247	23.3994	11.3747	12.3497	12.3497
343	20.1495	11.6997	22.7494	11.0497	12.6747	12.0247
344	20.7995	12.6747	24.0494	10.7247	12.6747	12.0247
345	20.4745	12.3497	23.3994	11.0497	12.9997	12.3497
346	20.4745	12.0247	24.3744	10.7247	12.6747	12.3497
347	20.1495	12.6747	23.0744	11.0497	12.9997	12.0247
348	20.7995	12.6747	23.7244	10.7247	12.9997	12.3497
349	20.4745	12.0247	23.3994	11.0497	12.6747	12.0247
350	20.1495	12.6747	23.3994	11.0497	12.9997	11.6997
351	20.4745	12.3497	24.3744	10.7247	12.9997	11.6997
352	20.1495	12.3497	24.3744	10.7247	12.9997	12.3497
353	20.1495	11.6997	24.0494	11.0497	12.9997	12.3497
354	20.4745	12.3497	23.7244	10.3997	12.6747	12.0247
355	20.1495	12.3497	23.3994	10.7247	12.9997	12.0247
356	20.1495	12.0247	22.4244	10.7247	12.9997	12.3497
357	20.4745	12.0247	23.0744	10.3997	12.9997	12.0247
358	20.1495	11.6997	23.0744	11.0497	12.9997	12.0247
359	20.4745	12.3497	23.0744	11.6997	12.9997	12.0247
360	20.7995	12.3497	23.3994	11.3747	12.9997	12.0247
361	20.4745	12.0247	23.0744	10.7247	12.9997	12.3497
362	20.4745	12.0247	23.3994	11.0497	12.9997	12.0247
363	20.4745	12.0247	22.7494	11.3747	12.9997	12.0247
364	20.4745	12.0247	23.3994	10.7247	12.9997	12.0247
365	20.7995	12.3497	23.3994	11.0497	12.9997	12.3497
366	20.4745	12.0247	23.7244	11.0497	12.9997	12.0247
367	20.4745	12.3497	23.3994	10.7247	12.6747	11.6997
368	20.4745	12.3497	23.0744	10.7247	12.9997	12.0247
369	20.4745	12.3497	23.3994	10.7247	12.9997	12.0247
370	20.4745	12.3497	24.0494	10.7247	12.9997	12.0247
371	20.4745	12.0247	23.3994	11.0497	12.9997	12.0247
372	20.7995	12.3497	24.0494	10.7247	12.6747	12.3497
373	20.4745	12.3497	23.3994	11.0497	12.9997	12.0247
374	20.4745	12.3497	23.0744	10.7247	12.9997	12.0247
375	20.4745	12.0247	23.3994	11.0497	12.9997	12.3497
376	20.4745	12.0247	23.3994	11.0497	12.9997	12.0247
377	20.4745	12.6747	23.0744	10.7247	12.9997	12.3497
378	20.4745	12.3497	23.0744	11.0497	12.6747	12.0247
379	20.4745	12.3497	24.0494	11.0497	12.6747	12.3497
380	20.4745	12.3497	23.7244	11.0497	12.9997	12.3497
381	20.4745	12.3497	23.3994	10.7247	12.9997	12.0247
382	20.4745	12.3497	23.0744	10.7247	12.9997	12.0247
383	20.4745	12.3497	23.0744	10.3997	12.9997	12.0247
384	20.4745	11.6997	23.0744	11.0497	12.9997	12.0247
385	20.4745	11.3747	23.7244	10.7247	12.9997	12.0247
386	20.4745	12.3497	23.0744	11.0497	12.9997	12.0247
387	20.4745	12.3497	22.7494	11.0497	12.9997	12.0247
388	20.4745	12.3497	24.0494	11.0497	12.9997	11.6997
389	20.4745	12.3497	23.0744	11.0497	12.9997	12.0247
390	20.4745	12.0247	24.0494	11.6997	12.9997	12.0247
391	20.4745	12.0247	23.3994	10.7247	12.9997	12.3497
392	20.4745	12.0247	23.0744	11.0497	12.9997	12.0247
393	20.1495	12.0247	24.0494	11.0497	12.9997	12.0247
394	20.4745	11.3747	23.0744	11.0497	12.9997	12.0247
395	20.4745	11.6997	23.3994	10.7247	12.9997	12.0247
396	20.1495	12.0247	23.7244	11.0497	12.9997	12.0247
397	20.4745	12.3497	23.0744	11.0497	12.9997	12.0247
398	20.4745	12.0247	24.0494	11.0497	12.6747	12.0247
399	20.4745	12.3497	23.7244	11.3747	12.9997	11.6997
400	20.4745	11.6997	23.7244	11.0497	12.9997	11.6997
401	20.1495	12.0247	23.7244	10.7247	12.9997	12.0247
402	20.4745	12.3497	23.0744	10.7247	12.6747	11.6997
403	20.4745	11.6997	23.3994	11.0497	12.6747	12.0247
404	20.1495	12.0247	23.3994	11.0497	12.9997	12.0247
405	20.4745	11.6997	23.3994	11.0497	12.9997	12.0247
406	20.4745	11.6997	23.7244	10.3997	12.6747	12.0247
407	20.4745	12.6747	23.3994	11.0497	12.9997	12.0247
408	20.1495	12.0247	23.7244	11.0497	12.9997	12.3497
409	20.4745	11.6997	23.7244	11.0497	12.9997	12.0247
410	20.4745	12.0247	23.3994	10.3997	12.9997	12.0247
411	20.1495	11.6997	23.7244	11.0497	12.6747	12.0247
412	20.4745	12.0247	23.0744	11.0497	12.9997	12.3497
413	20.4745	11.6997	23.3994	11.0497	12.9997	12.3497
414	20.4745	12.0247	23.7244	10.7247	12.9997	12.3497
415	20.4745	11.6997	23.3994	11.0497	12.6747	12.3497
416	20.4745	11.6997	24.0494	10.7247	12.9997	12.3497
417	20.1495	12.0247	23.7244	10.7247	12.9997	12.0247
418	20.1495	12.0247	23.7244	12.3497	12.6747	12.0247
419	20.4745	12.3497	23.3994	10.7247	12.6747	12.0247
420	20.1495	12.0247	23.7244	11.0497	12.9997	11.6997
421	20.1495	12.3497	23.3994	11.0497	12.9997	12.3497
422	20.1495	12.3497	23.3994	10.7247	12.6747	12.0247
423	20.1495	11.6997	23.3994	11.0497	12.9997	12.3497
424	20.1495	12.0247	23.7244	11.0497	12.6747	12.0247
425	19.8245	11.6997	23.3994	10.7247	12.6747	12.3497
426	20.1495	12.3497	23.7244	11.0497	12.9997	12.0247
427	19.8245	12.0247	23.7244	11.0497	12.6747	12.0247
428	20.1495	12.3497	23.7244	11.0497	12.9997	12.3497
429	19.8245	11.6997	23.3994	11.0497	12.6747	12.3497
430	20.1495	12.3497	23.3994	11.3747	12.6747	12.0247
431	20.1495	12.6747	24.0494	11.0497	12.6747	12.0247
432	20.1495	12.3497	23.0744	11.3747	12.6747	12.0247
433	20.4745	12.9997	23.7244	11.3747	12.6747	12.0247
434	20.1495	12.6747	23.7244	11.0497	12.6747	12.0247
435	20.1495	12.0247	23.3994	11.3747	12.6747	12.3497
436	20.1495	12.0247	23.7244	10.7247	12.6747	12.3497
437	19.8245	12.0247	23.3994	11.3747	12.6747	12.0247
438	20.1495	11.6997	23.7244	10.7247	12.6747	12.0247
439	19.8245	12.0247	24.0494	11.0497	12.6747	11.6997
440	19.8245	12.3497	23.7244	10.3997	12.6747	12.0247
441	20.4745	12.0247	23.7244	11.0497	12.6747	12.3497
442	19.8245	12.0247	23.7244	11.0497	12.6747	12.0247
443	19.8245	12.0247	23.7244	11.0497	12.6747	12.3497
444	20.1495	12.0247	24.0494	10.3997	12.6747	12.0247
445	19.8245	11.6997	24.3744	10.7247	12.6747	12.3497
446	19.8245	12.3497	24.0494	11.3747	12.6747	12.0247
447	20.4745	12.0247	24.0494	11.0497	12.6747	12.0247
448	20.4745	11.6997	24.0494	11.0497	12.6747	12.3497
449	20.1495	12.0247	24.0494	11.3747	12.6747	12.0247
450	20.1495	11.6997	24.0494	11.0497	12.6747	12.3497
451	20.1495	12.0247	23.7244	10.7247	12.6747	12.3497
452	20.1495	12.0247	23.7244	11.0497	12.6747	12.0247
453	20.1495	11.6997	24.0494	10.7247	12.6747	12.0247
454	20.1495	12.0247	23.7244	10.7247	12.6747	12.3497
455	20.1495	12.3497	23.7244	11.0497	12.3497	12.0247
456	20.1495	12.3497	23.7244	11.0497	12.6747	12.3497
457	20.1495	12.0247	23.3994	11.0497	12.6747	12.0247
458	20.1495	12.0247	24.0494	11.0497	12.6747	12.3497
459	20.1495	12.6747	23.3994	11.0497	12.3497	12.3497
460	20.1495	12.3497	23.7244	11.3747	12.6747	12.0247
461	19.8245	12.6747	23.7244	11.0497	12.6747	12.3497
462	19.8245	12.3497	23.7244	11.0497	12.6747	12.3497
463	20.1495	12.6747	24.0494	10.3997	12.6747	12.0247
464	20.1495	12.9997	24.0494	11.0497	12.6747	11.6997
465	19.8245	12.6747	23.7244	10.7247	12.6747	12.0247
466	20.4745	12.9997	24.3744	10.7247	12.6747	12.3497
467	20.1495	12.9997	23.7244	10.7247	12.6747	12.3497
468	20.4745	12.6747	24.0494	10.7247	12.6747	12.3497
469	20.1495	12.9997	23.7244	11.0497	12.6747	12.0247
470	20.4745	12.9997	23.7244	10.7247	12.6747	12.3497
471	20.4745	12.9997	24.0494	11.3747	12.6747	12.0247
472	20.1495	12.6747	24.0494	10.7247	12.6747	12.0247
473	20.1495	12.6747	24.0494	10.7247	12.6747	12.3497
474	20.1495	12.6747	24.0494	11.0497	12.6747	12.0247
475	20.4745	12.3497	24.0494	10.7247	12.6747	12.0247
476	20.4745	12.3497	23.7244	10.7247	12.6747	12.0247
477	20.1495	12.6747	24.0494	10.3997	12.6747	12.0247
478	20.1495	12.3497	24.0494	11.3747	12.6747	12.0247
479	20.4745	12.3497	23.7244	11.0497	12.6747	12.0247
480	20.4745	12.6747	24.0494	10.7247	12.6747	12.0247
481	20.4745	12.0247	24.0494	11.3747	12.6747	12.3497
482	20.1495	12.3497	24.3744	11.0497	12.6747	12.0247
483	20.4745	12.6747	24.3744	11.0497	12.6747	12.0247
484	20.1495	12.6747	24.3744	10.7247	12.6747	12.0247
485	20.1495	12.6747	24.0494	10.7247	12.6747	12.3497
486	20.4745	12.3497	24.0494	11.0497	12.6747	11.6997
487	20.4745	12.6747	24.3744	10.7247	12.6747	12.3497
488	20.4745	12.6747	24.0494	10.7247	12.6747	12.3497
489	20.4745	12.6747	24.0494	10.3997	12.6747	12.0247
490	20.4745	12.3497	23.7244	10.7247	12.6747	12.0247
491	20.4745	12.6747	24.3744	10.7247	12.6747	12.0247
492	20.1495	12.3497	24.0494	10.7247	12.6747	12.0247
493	20.4745	12.6747	24.0494	10.7247	12.6747	12.3497
494	20.1495	12.3497	24.0494	10.7247	12.6747	12.0247
495	20.1495	12.6747	24.6994	10.3997	12.6747	12.0247
496	20.4745	12.3497	24.0494	10.3997	12.6747	12.0247
497	20.4745	12.6747	23.7244	11.0497	12.6747	12.0247
498	20.1495	12.3497	23.7244	11.0497	12.6747	12.0247
499	20.1495	12.6747	23.7244	11.0497	12.6747	12.0247
500	20.4745	12.6747	24.0494	11.0497	12.6747	12.0247
501	20.1495	12.6747	24.0494	11.0497	12.6747	12.0247
502	20.1495	12.3497	24.0494	11.0497	12.6747	12.3497
503	20.1495	12.3497	24.0494	11.0497	12.6747	12.0247
504	20.1495	12.0247	24.3744	11.0497	12.6747	12.0247
505	20.1495	12.3497	24.0494	11.0497	12.6747	12.3497
506	20.4745	12.0247	24.3744	10.7247	12.6747	12.0247
507	20.1495	12.0247	24.3744	10.7247	12.6747	12.3497
508	20.4745	12.3497	24.3744	10.7247	12.9997	12.0247
509	20.1495	12.0247	24.3744	10.7247	12.6747	12.0247
510	20.1495	12.0247	24.3744	10.7247	12.9997	12.0247
511	20.1495	12.3497	24.0494	10.7247	12.6747	12.0247
512	20.4745	12.3497	24.0494	10.7247	12.6747	12.0247
513	20.1495	12.3497	24.3744	11.0497	12.6747	12.0247
514	20.1495	12.6747	24.0494	11.0497	12.6747	12.0247
515	20.1495	12.3497	24.0494	11.0497	12.6747	12.0247
516	20.4745	12.6747	24.0494	11.0497	12.6747	12.3497
517	20.1495	12.9997	24.0494	11.0497	12.6747	12.0247
518	20.1495	12.6747	24.0494	10.7247	12.9997	12.0247
519	20.1495	12.6747	24.0494	10.7247	12.6747	12.0247
520	20.1495	12.6747	24.0494	10.7247	12.9997	12.3497
521	20.1495	12.3497	23.7244	11.0497	12.9997	12.0247
522	20.1495	12.6747	23.3994	10.7247	12.6747	12.0247
523	20.1495	12.6747	24.0494	10.7247	12.6747	12.3497
524	20.4745	12.6747	24.0494	10.7247	12.9997	12.0247
525	20.1495	12.6747	24.0494	10.7247	12.9997	12.3497
526	20.1495	12.3497	23.7244	11.0497	12.9997	12.6747
527	20.1495	12.6747	24.0494	11.0497	12.9997	12.0247
528	20.1495	12.6747	24.0494	11.0497	12.9997	12.3497
529	20.1495	12.6747	23.7244	11.0497	12.9997	12.3497
530	20.1495	12.9997	23.7244	11.0497	12.9997	12.3497
531	20.4745	12.6747	24.0494	10.7247	12.9997	12.0247
532	20.4745	12.6747	24.3744	10.7247	12.9997	12.0247
533	20.1495	12.6747	23.7244	10.7247	12.9997	12.3497
534	20.1495	12.6747	24.3744	11.0497	12.6747	12.3497
535	20.1495	12.3497	23.7244	10.7247	12.9997	12.0247
536	20.4745	12.6747	24.0494	10.3997	12.9997	12.3497
537	20.1495	12.6747	23.3994	10.7247	12.6747	12.3497
538	20.1495	12.6747	23.7244	11.0497	12.6747	12.3497
539	20.4745	12.6747	25.0244	11.0497	12.9997	12.0247
540	20.4745	12.6747	24.0494	11.3747	12.6747	12.3497
541	20.4745	12.3497	23.7244	10.7247	12.6747	12.0247
542	20.1495	12.3497	24.0494	11.3747	12.9997	12.3497
543	20.4745	12.6747	23.7244	11.0497	12.9997	12.0247
544	20.1495	12.6747	23.7244	10.3997	12.6747	12.3497
545	20.1495	12.9997	24.3744	11.0497	12.9997	12.3497
546	20.4745	12.6747	24.0494	10.7247	12.6747	12.0247
547	20.1495	12.6747	24.0494	10.3997	12.6747	12.3497
548	20.4745	12.6747	24.6994	11.0497	12.6747	12.3497
549	20.1495	12.6747	23.3994	11.3747	12.6747	12.3497
550	20.1495	12.6747	24.0494	11.0497	12.6747	12.3497
551	20.4745	12.6747	23.3994	10.7247	12.9997	12.3497
552	20.1495	12.6747	24.0494	11.0497	12.6747	12.0247
553	20.1495	12.6747	24.0494	10.7247	12.6747	12.0247
554	20.4745	12.6747	24.3744	10.7247	12.6747	12.3497
555	20.1495	12.3497	24.0494	10.7247	12.6747	12.3497
556	20.4745	12.6747	23.7244	11.0497	12.6747	12.0247
557	20.1495	12.6747	24.0494	11.0497	12.6747	12.3497
558	20.4745	12.3497	24.0494	10.7247	12.6747	12.3497
559	20.4745	12.9997	24.3744	11.0497	12.6747	12.0247
560	20.1495	12.6747	24.3744	11.3747	12.9997	12.0247
561	19.8245	12.9997	23.7244	10.7247	12.6747	11.6997
562	19.4995	12.6747	24.0494	11.3747	12.9997	12.6747
563	20.1495	12.3497	23.7244	10.7247	12.6747	12.0247
564	20.1495	12.9997	23.7244	11.0497	12.6747	12.0247
565	20.1495	12.6747	24.3744	10.3997	12.6747	12.3497
566	20.1495	12.6747	23.7244	11.3747	12.6747	12.0247
567	20.1495	12.3497	23.7244	11.0497	12.6747	12.6747
568	20.1495	12.6747	24.0494	10.7247	12.6747	12.0247
569	20.4745	12.6747	24.3744	10.7247	12.6747	12.0247
570	20.4745	12.3497	24.0494	10.3997	12.6747	12.0247
571	20.4745	12.6747	24.3744	10.7247	12.3497	12.3497
572	20.4745	12.6747	24.3744	11.0497	12.6747	12.0247
573	20.1495	12.9997	24.0494	11.0497	12.6747	12.0247
574	20.1495	12.3497	24.0494	11.0497	12.6747	12.0247
575	20.1495	12.9997	23.3994	11.0497	12.6747	12.0247
576	20.4745	12.3497	24.3744	11.0497	12.6747	12.0247
577	20.4745	12.3497	23.7244	11.0497	12.6747	12.3497
578	20.4745	12.6747	23.3994	11.0497	12.6747	12.0247
579	20.1495	12.3497	24.3744	10.7247	12.6747	11.6997
580	20.1495	12.6747	23.7244	11.0497	12.6747	12.0247
581	20.4745	12.6747	24.0494	11.0497	12.6747	12.0247
582	20.4745	12.9997	24.0494	10.7247	12.6747	12.0247
583	20.4745	12.6747	23.7244	10.7247	12.6747	12.0247
584	20.1495	12.3497	23.7244	11.0497	12.6747	12.0247
585	20.1495	12.3497	23.7244	10.3997	12.6747	12.0247
586	20.1495	12.6747	24.0494	11.0497	12.6747	11.6997
587	20.1495	12.9997	23.3994	10.7247	12.6747	11.6997
588	20.1495	12.6747	23.7244	10.7247	12.6747	11.6997
589	20.1495	12.3497	23.7244	10.7247	12.6747	12.0247
590	20.4745	12.9997	23.7244	11.3747	12.6747	11.6997
591	20.4745	12.3497	23.7244	10.7247	12.6747	12.0247
592	20.1495	12.6747	23.7244	11.0497	12.6747	12.0247
593	20.1495	12.3497	23.3994	11.0497	12.6747	11.6997
594	20.1495	12.3497	24.0494	10.7247	12.6747	12.3497
595	20.1495	12.0247	23.7244	11.0497	12.6747	12.3497
596	20.1495	12.3497	23.7244	10.3997	12.6747	12.0247
597	20.1495	12.3497	23.7244	11.0497	12.6747	11.6997
598	20.1495	12.3497	23.3994	11.0497	12.6747	12.3497
599	20.1495	12.3497	23.7244	10.3997	12.6747	12.0247
600	20.1495	12.3497	23.7244	10.7247	12.6747	12.0247
601	20.1495	12.3497	23.7244	10.7247	12.9997	11.6997
602	20.4745	12.3497	24.0494	10.7247	12.6747	12.0247
603	20.1495	11.6997	24.0494	10.7247	12.6747	12.0247
604	20.1495	12.3497	23.7244	10.7247	12.6747	12.3497
605	20.1495	12.3497	23.7244	11.0497	12.6747	12.0247
606	20.1495	12.3497	23.7244	10.7247	12.6747	12.3497
607	20.4745	12.3497	23.7244	10.7247	12.6747	12.6747
608	20.1495	12.6747	23.3994	11.0497	12.6747	12.0247
609	20.1495	12.3497	23.7244	10.3997	12.6747	12.3497
610	20.1495	12.3497	23.7244	11.0497	12.6747	12.0247
611	20.1495	12.3497	23.7244	10.7247	12.6747	12.3497
612	20.1495	12.6747	24.0494	10.7247	12.6747	12.0247
613	20.4745	12.3497	23.7244	10.7247	12.6747	12.0247
614	20.1495	12.3497	24.0494	10.7247	12.6747	12.0247
615	20.1495	12.3497	23.7244	11.0497	12.6747	12.3497
616	20.1495	12.6747	24.0494	10.7247	12.6747	12.6747
617	20.1495	12.3497	23.7244	10.3997	12.6747	12.0247
618	20.1495	12.3497	24.0494	10.7247	12.6747	12.0247
619	20.1495	12.3497	24.0494	10.3997	12.6747	12.3497
620	20.1495	12.3497	24.0494	10.3997	12.6747	12.3497
621	20.1495	12.3497	23.7244	11.0497	12.6747	12.0247
622	20.1495	12.3497	24.0494	10.7247	12.6747	12.3497
623	20.1495	12.3497	23.7244	11.0497	12.6747	12.0247
624	20.1495	12.0247	24.3744	10.3997	12.6747	12.0247
625	20.1495	12.0247	24.3744	10.7247	12.6747	12.0247
626	20.1495	12.0247	24.3744	11.0497	12.6747	12.0247
627	20.4745	12.0247	24.3744	10.3997	12.6747	12.0247
628	20.1495	12.3497	24.0494	10.3997	12.6747	12.3497
629	20.4745	12.3497	24.3744	10.3997	12.6747	12.0247
630	20.1495	12.3497	24.0494	11.3747	12.6747	12.0247
631	20.4745	12.6747	23.7244	10.7247	12.6747	12.0247
632	20.1495	12.0247	24.0494	10.7247	12.6747	12.0247
633	20.4745	12.0247	24.0494	10.7247	12.6747	12.0247
634	19.8245	11.3747	24.0494	11.0497	12.6747	12.0247
635	20.1495	12.6747	23.7244	10.7247	12.6747	12.0247
636	20.1495	12.3497	24.0494	10.7247	12.6747	12.0247
637	20.1495	12.3497	23.7244	10.7247	12.6747	12.3497
638	20.1495	12.3497	24.0494	10.7247	12.6747	12.0247
639	19.8245	11.6997	23.3994	10.7247	12.6747	12.3497
640	19.8245	12.0247	24.3744	11.0497	12.6747	12.0247
641	19.8245	12.3497	24.0494	10.3997	12.6747	12.0247
642	20.1495	12.6747	24.0494	10.7247	12.6747	12.0247
643	20.1495	12.3497	24.0494	10.3997	12.6747	12.0247
644	20.1495	12.3497	24.3744	10.7247	12.6747	12.0247
645	20.1495	12.3497	24.0494	10.3997	12.6747	12.3497
646	20.1495	12.3497	23.7244	10.3997	12.6747	12.3497
647	19.8245	12.3497	24.3744	10.7247	12.6747	12.0247
648	20.1495	12.3497	24.0494	10.7247	12.6747	12.0247
649	20.1495	12.3497	24.0494	10.7247	12.6747	12.0247
650	20.1495	12.0247	24.3744	10.7247	12.6747	12.0247
651	20.1495	12.3497	24.3744	10.7247	12.6747	12.0247
652	20.1495	12.3497	24.0494	10.7247	12.6747	12.0247
653	20.1495	12.6747	24.3744	10.7247	12.6747	11.6997
654	20.1495	12.3497	24.0494	10.3997	12.6747	12.0247
655	20.1495	12.0247	24.3744	10.3997	12.6747	12.0247
656	20.1495	12.0247	24.0494	11.0497	12.6747	12.0247
657	20.1495	12.0247	24.0494	10.7247	12.6747	12.0247
658	20.1495	12.6747	24.0494	11.3747	12.6747	12.0247
659	20.1495	12.0247	24.3744	10.3997	12.6747	12.3497
660	20.1495	12.0247	23.7244	10.3997	12.6747	12.3497
661	20.1495	12.0247	24.3744	10.7247	12.6747	12.0247
662	20.1495	12.6747	24.0494	11.0497	12.6747	12.3497
663	20.1495	12.3497	24.3744	10.7247	12.6747	12.0247
664	20.1495	12.0247	23.7244	10.3997	12.6747	12.0247
665	20.1495	11.6997	23.7244	10.3997	12.6747	12.0247
666	20.1495	12.6747	24.3744	11.0497	12.6747	12.0247
667	20.1495	12.3497	24.0494	10.7247	12.6747	12.0247
668	20.1495	12.0247	23.7244	11.0497	12.6747	12.0247
669	20.1495	12.6747	23.7244	10.7247	12.6747	12.0247
670	20.1495	12.3497	24.0494	11.0497	12.6747	12.3497
671	20.1495	12.3497	24.0494	11.0497	12.6747	12.0247
672	20.1495	12.3497	24.3744	10.7247	12.6747	12.3497
673	20.1495	12.3497	24.3744	11.0497	12.6747	12.3497
674	20.1495	11.6997	24.0494	11.0497	12.3497	12.0247
675	20.1495	12.0247	24.3744	10.7247	12.6747	12.0247
676	20.1495	12.3497	24.6994	10.3997	12.6747	12.3497
677	20.1495	12.0247	23.7244	10.7247	12.6747	12.3497
678	20.1495	12.0247	24.0494	10.7247	12.6747	12.3497
679	20.1495	11.6997	24.3744	10.7247	12.6747	12.3497
680	20.1495	12.0247	24.3744	11.0497	12.6747	12.3497
681	20.1495	11.6997	24.3744	10.7247	12.3497	12.3497
682	20.1495	12.0247	24.6994	10.7247	12.3497	12.0247
683	20.1495	12.0247	24.3744	10.7247	12.6747	12.0247
684	20.1495	11.6997	24.0494	11.0497	12.6747	12.3497
685	20.1495	12.3497	24.3744	10.3997	12.6747	12.6747
686	20.1495	12.0247	24.0494	11.0497	12.3497	12.0247
687	20.1495	11.3747	24.0494	10.7247	12.3497	12.3497
688	20.1495	12.0247	24.6994	10.3997	12.3497	12.0247
689	20.1495	11.6997	24.3744	11.3747	12.6747	12.3497
690	20.1495	11.6997	24.3744	10.7247	12.6747	12.0247
691	20.1495	12.0247	24.3744	10.7247	12.6747	12.0247
692	20.1495	12.3497	24.3744	11.0497	12.6747	12.0247
693	20.1495	12.3497	24.3744	11.0497	12.6747	12.3497
694	20.1495	12.6747	24.0494	11.0497	12.6747	12.0247
695	20.1495	12.3497	23.7244	10.3997	12.6747	12.0247
696	20.1495	11.6997	24.3744	10.7247	12.6747	12.3497
697	20.1495	12.0247	24.3744	10.3997	12.6747	12.3497
698	20.1495	12.0247	24.3744	11.0497	12.6747	12.0247
699	20.1495	12.0247	24.3744	10.3997	12.6747	12.0247
700	20.1495	12.0247	24.3744	10.7247	12.6747	12.3497
701	20.1495	11.6997	24.0494	10.7247	12.6747	12.3497
702	20.1495	12.0247	24.3744	10.3997	12.6747	12.0247
703	20.1495	12.3497	24.0494	10.7247	12.6747	12.0247
704	20.1495	12.6747	24.3744	11.0497	12.6747	12.0247
705	20.4745	12.0247	24.3744	10.3997	12.6747	12.0247
706	20.1495	12.3497	24.3744	11.0497	12.6747	12.0247
707	20.1495	11.3747	23.7244	10.7247	12.6747	12.0247
708	20.1495	12.3497	24.0494	10.7247	12.6747	12.3497
709	20.4745	12.3497	24.3744	10.7247	12.6747	12.0247
710	20.1495	12.0247	24.0494	10.3997	12.6747	12.0247
711	20.1495	12.6747	24.3744	11.0497	12.6747	12.0247
712	20.1495	12.3497	24.3744	11.0497	12.6747	12.0247
713	20.1495	12.3497	24.0494	10.3997	12.6747	12.0247
714	20.1495	12.6747	24.0494	10.7247	12.6747	12.3497
715	20.4745	11.6997	24.3744	10.7247	12.6747	12.0247
716	20.1495	12.3497	24.6994	10.3997	12.3497	12.0247
717	20.1495	12.0247	24.3744	10.7247	12.3497	12.0247
718	20.1495	12.0247	24.0494	10.7247	12.3497	12.0247
719	20.1495	12.3497	24.0494	10.7247	12.6747	12.0247
720	20.4745	11.6997	24.3744	11.0497	12.6747	12.0247
721	20.1495	11.6997	24.0494	10.7247	12.6747	12.0247
722	20.4745	12.0247	24.3744	11.0497	12.6747	12.0247
723	20.1495	11.6997	24.0494	10.7247	12.6747	12.0247
724	20.1495	12.3497	24.3744	11.3747	12.3497	12.0247
725	20.4745	12.6747	24.0494	10.3997	12.9997	12.0247
726	20.1495	12.3497	24.0494	10.7247	12.3497	12.0247
727	20.1495	11.3747	24.3744	10.3997	12.6747	12.0247
728	20.1495	12.0247	24.0494	10.3997	12.6747	12.0247
729	20.4745	12.3497	24.3744	11.6997	12.6747	12.0247
730	20.1495	12.3497	24.3744	10.7247	12.3497	12.0247
731	20.1495	11.6997	24.6994	11.0497	12.3497	12.0247
732	20.1495	12.3497	24.3744	10.7247	12.3497	12.3497
733	20.1495	12.3497	24.3744	10.7247	12.3497	12.0247
734	20.1495	12.3497	24.3744	10.7247	12.3497	12.0247
735	20.1495	12.0247	24.3744	10.7247	12.3497	12.0247
736	20.1495	12.3497	24.0494	10.3997	12.3497	12.0247
737	20.1495	12.0247	24.3744	10.7247	12.3497	12.3497
738	20.1495	12.6747	24.0494	10.3997	12.3497	12.0247
739	20.1495	12.0247	24.3744	10.7247	12.3497	12.0247
740	20.4745	12.3497	24.0494	11.0497	12.3497	12.0247
741	20.1495	12.3497	24.0494	10.7247	12.3497	12.0247
742	20.1495	12.6747	24.3744	10.7247	12.3497	12.0247
743	20.1495	12.0247	24.3744	10.7247	12.3497	12.0247
744	20.1495	12.3497	24.3744	10.3997	12.3497	12.0247
745	20.1495	12.6747	24.3744	10.7247	12.3497	12.0247
746	20.1495	12.3497	24.6994	10.7247	12.0247	12.0247
747	20.1495	12.0247	24.0494	10.7247	12.3497	12.0247
748	20.1495	12.3497	24.3744	10.3997	12.3497	12.0247
749	20.1495	12.6747	24.3744	10.3997	12.3497	12.0247
750	20.1495	12.3497	24.3744	10.3997	12.3497	12.0247
751	20.1495	12.3497	24.0494	11.0497	12.3497	12.0247
752	20.1495	12.6747	24.3744	11.3747	12.3497	12.0247
753	20.1495	12.0247	24.0494	11.0497	12.3497	12.0247
754	20.1495	12.3497	24.3744	10.7247	12.3497	12.0247
755	20.4745	12.0247	24.3744	10.7247	12.3497	12.0247
756	20.1495	12.6747	24.3744	10.3997	12.0247	12.0247
757	20.1495	12.3497	24.0494	10.7247	12.3497	12.0247
758	20.1495	12.0247	24.6994	10.3997	12.3497	11.6997
759	20.1495	12.0247	24.6994	10.7247	12.3497	12.0247
760	20.1495	12.0247	24.6994	10.7247	12.3497	11.6997
761	20.1495	12.3497	24.3744	10.7247	12.3497	12.3497
762	20.1495	12.0247	24.3744	11.0497	12.3497	12.0247
763	20.1495	12.3497	24.6994	10.7247	12.3497	12.3497
764	20.1495	12.0247	24.0494	10.3997	12.3497	12.0247
765	20.1495	12.3497	24.6994	10.7247	12.3497	12.0247
766	20.4745	12.0247	24.6994	10.3997	12.3497	12.0247
767	20.1495	12.0247	24.0494	10.3997	12.3497	12.3497
768	20.1495	12.0247	24.6994	10.7247	12.3497	12.0247
769	20.1495	12.3497	24.3744	10.7247	12.3497	12.0247
770	20.1495	11.6997	24.3744	11.0497	12.3497	12.0247
771	20.1495	12.0247	24.3744	10.7247	12.3497	12.0247
772	20.1495	12.0247	24.0494	10.3997	12.3497	12.0247
773	20.1495	11.6997	24.6994	10.3997	12.3497	12.0247
774	20.1495	12.0247	24.3744	10.3997	12.3497	11.6997
775	20.1495	12.3497	24.3744	10.7247	12.3497	12.3497
776	20.1495	12.6747	24.3744	10.7247	12.3497	12.0247
777	20.1495	12.3497	24.3744	10.7247	12.3497	12.0247
778	20.1495	12.0247	25.0244	11.0497	12.0247	12.0247
779	20.1495	11.6997	24.3744	10.7247	12.0247	12.3497
780	20.1495	12.6747	24.3744	10.7247	12.0247	12.0247
781	20.4745	12.6747	24.3744	11.0497	12.0247	12.0247
782	20.1495	12.3497	24.3744	11.0497	12.0247	12.3497
783	20.1495	12.3497	24.3744	10.3997	12.0247	12.0247
784	20.1495	12.3497	24.0494	10.3997	12.0247	12.3497
785	20.4745	12.6747	24.3744	11.0497	11.6997	12.0247
786	20.1495	12.3497	24.0494	10.3997	11.6997	12.0247
787	20.1495	12.3497	24.6994	10.3997	12.0247	12.0247
788	20.1495	12.6747	24.3744	10.3997	12.0247	12.0247
789	20.1495	12.6747	24.6994	10.7247	12.0247	11.6997
790	20.1495	12.3497	24.3744	10.7247	12.0247	12.3497
791	20.1495	12.3497	24.3744	10.3997	11.6997	12.3497
792	20.1495	12.6747	24.3744	10.7247	12.0247	11.6997
793	20.1495	12.3497	24.3744	10.7247	12.0247	12.0247
794	20.4745	12.3497	24.3744	10.3997	12.0247	12.3497
795	20.1495	12.0247	24.3744	10.3997	11.6997	12.0247
796	20.1495	12.3497	24.0494	10.7247	12.0247	12.0247
797	20.1495	12.3497	24.3744	10.3997	12.0247	12.0247
798	20.1495	12.6747	24.6994	11.0497	12.0247	12.3497
799	20.4745	12.3497	24.3744	10.7247	12.0247	11.6997
800	20.7995	12.6747	24.3744	11.0497	12.0247	12.0247
801	20.1495	12.3497	24.6994	10.7247	12.0247	11.3747
802	20.4745	12.6747	24.6994	10.3997	11.6997	12.0247
803	20.4745	12.0247	24.6994	10.7247	11.6997	12.0247
804	20.1495	12.3497	24.6994	10.7247	12.0247	12.0247
805	20.1495	12.3497	24.3744	10.7247	12.0247	12.0247
806	20.1495	12.0247	24.3744	11.0497	12.0247	12.3497
807	20.1495	12.3497	24.3744	10.7247	12.0247	12.0247
808	20.1495	12.3497	24.3744	10.3997	12.0247	11.6997
809	20.4745	12.6747	24.3744	10.3997	11.6997	12.0247
810	20.4745	12.0247	24.6994	10.3997	11.6997	12.0247
811	20.1495	12.0247	24.3744	10.3997	11.6997	12.0247
812	20.1495	12.0247	24.3744	10.7247	11.6997	11.6997
813	20.1495	12.6747	24.3744	10.7247	12.0247	12.0247
814	20.4745	12.3497	24.3744	10.3997	12.0247	12.0247
815	20.1495	12.0247	24.3744	10.7247	12.0247	12.3497
816	20.1495	12.3497	24.3744	10.3997	12.0247	12.0247
817	20.1495	12.3497	24.0494	11.0497	12.0247	12.0247
818	20.1495	12.3497	24.0494	10.7247	12.0247	12.0247
819	20.1495	12.3497	24.0494	11.0497	12.0247	11.6997
820	20.1495	12.3497	24.3744	10.7247	12.0247	12.0247
821	20.1495	12.3497	24.3744	10.7247	12.0247	12.0247
822	20.1495	12.3497	24.3744	10.7247	12.0247	11.6997
823	20.4745	12.3497	24.6994	10.3997	12.0247	11.6997
824	20.1495	12.3497	24.3744	10.7247	12.0247	11.6997
825	20.1495	12.3497	24.3744	10.7247	12.0247	12.0247
826	20.1495	12.3497	24.3744	10.3997	12.0247	12.3497
827	20.1495	12.6747	24.0494	10.7247	12.0247	12.0247
828	20.4745	12.9997	24.3744	10.7247	12.0247	11.6997
829	20.1495	12.3497	24.3744	11.0497	12.0247	12.0247
830	20.1495	12.3497	24.3744	10.7247	12.0247	11.6997
831	20.1495	12.3497	24.3744	11.0497	12.0247	11.6997
832	20.1495	12.0247	24.3744	10.3997	12.0247	11.6997
833	20.1495	12.3497	24.3744	10.3997	12.0247	11.6997
834	20.1495	12.6747	24.6994	10.7247	11.6997	12.0247
835	20.1495	12.3497	24.3744	10.3997	12.0247	12.0247
836	20.1495	12.0247	24.0494	10.7247	11.6997	11.6997
837	20.1495	12.0247	24.3744	10.7247	12.0247	11.6997
838	20.4745	12.0247	24.3744	10.7247	12.0247	11.6997
839	20.1495	12.3497	24.3744	11.0497	12.0247	12.0247
840	20.1495	12.0247	24.0494	10.7247	12.0247	11.6997
841	20.4745	12.6747	24.3744	11.0497	12.0247	11.6997
842	20.4745	12.6747	24.3744	10.7247	11.6997	12.0247
843	20.1495	12.0247	24.0494	10.7247	12.0247	12.0247
844	20.4745	12.0247	24.3744	10.7247	11.6997	12.0247
845	20.1495	12.3497	24.3744	10.7247	11.3747	11.6997
846	20.1495	12.6747	24.3744	10.3997	11.6997	12.0247
847	20.1495	12.0247	24.3744	10.7247	11.6997	11.3747
848	20.1495	12.3497	24.6994	10.7247	11.3747	12.0247
849	20.1495	12.3497	24.3744	10.7247	11.6997	12.0247
850	20.1495	12.9997	24.6994	10.7247	11.3747	12.0247
851	20.4745	12.3497	24.3744	10.7247	11.6997	11.3747
852	20.1495	12.6747	24.3744	11.3747	11.6997	12.0247
853	20.1495	12.0247	24.3744	11.3747	11.6997	12.0247
854	20.1495	12.3497	24.3744	10.7247	11.6997	12.0247
855	20.1495	12.6747	24.0494	10.7247	11.6997	12.0247
856	20.1495	12.3497	24.3744	10.3997	11.6997	12.3497
857	20.1495	12.3497	24.3744	10.3997	11.6997	12.0247
858	20.1495	11.6997	24.0494	10.7247	11.6997	11.6997
859	20.1495	12.3497	24.3744	10.3997	11.6997	12.0247
860	20.1495	12.3497	24.3744	11.0497	11.6997	12.0247
861	20.1495	12.0247	24.6994	10.7247	11.6997	12.0247
862	20.4745	12.0247	24.0494	10.7247	11.3747	11.6997
863	20.1495	12.3497	24.0494	10.7247	11.6997	12.0247
864	20.1495	12.0247	24.3744	10.7247	11.6997	11.6997
865	20.1495	12.3497	24.6994	10.3997	11.6997	11.6997
866	20.1495	12.3497	24.3744	10.3997	11.6997	12.0247
867	20.1495	12.6747	24.6994	10.7247	11.6997	12.0247
868	20.1495	12.3497	24.6994	10.3997	12.0247	12.0247
869	20.1495	12.6747	24.6994	10.7247	12.0247	12.0247
870	20.1495	12.0247	24.3744	10.3997	11.6997	12.0247
871	20.1495	12.3497	24.6994	10.3997	11.6997	12.0247
872	20.1495	12.3497	24.6994	10.3997	11.6997	12.0247
873	20.1495	12.3497	24.6994	10.7247	11.6997	11.6997
874	20.1495	12.0247	24.3744	11.0497	12.0247	12.0247
875	20.1495	12.0247	24.3744	10.7247	11.6997	11.3747
876	20.1495	12.3497	24.3744	10.3997	11.6997	11.6997
877	20.1495	12.6747	24.0494	11.0497	11.6997	11.6997
878	20.1495	12.0247	24.6994	10.7247	11.6997	12.0247
879	20.1495	12.3497	24.6994	10.3997	11.3747	11.6997
880	20.1495	12.3497	24.3744	10.7247	11.3747	12.0247
881	20.1495	12.3497	24.6994	10.7247	11.6997	11.6997
882	20.4745	12.6747	24.3744	10.3997	11.6997	12.0247
883	20.1495	12.3497	24.3744	10.3997	12.0247	11.3747
884	20.1495	12.0247	24.6994	11.0497	11.6997	12.0247
885	20.1495	12.3497	24.6994	10.7247	11.3747	12.0247
886	20.1495	12.3497	24.6994	10.7247	11.6997	12.0247
887	20.1495	12.3497	24.3744	10.3997	11.6997	11.6997
888	20.1495	12.0247	24.6994	10.7247	11.6997	12.0247
889	20.1495	12.0247	24.3744	10.7247	12.0247	12.0247
890	20.1495	12.3497	25.0244	10.7247	11.6997	12.0247
891	20.1495	12.3497	24.3744	10.7247	11.6997	11.6997
892	20.1495	12.3497	24.6994	10.7247	11.6997	12.0247
893	20.1495	12.3497	24.6994	11.0497	11.6997	12.3497
894	20.1495	12.3497	24.3744	11.0497	12.0247	11.6997
895	20.1495	12.3497	24.6994	10.7247	11.6997	11.6997
896	20.1495	12.3497	24.6994	10.3997	11.3747	12.0247
897	20.1495	12.6747	25.0244	10.7247	12.0247	11.6997
898	20.4745	12.3497	24.6994	10.3997	12.0247	12.0247
899	20.1495	12.0247	24.6994	11.0497	12.0247	11.3747
900	20.1495	12.3497	25.0244	11.0497	11.6997	11.6997
901	20.1495	12.3497	24.6994	10.7247	11.6997	11.6997
902	20.1495	12.0247	24.3744	11.0497	11.6997	12.0247
903	20.1495	12.6747	24.3744	10.7247	12.0247	12.0247
904	20.1495	12.0247	24.6994	10.3997	11.6997	11.6997
905	20.4745	12.3497	24.6994	10.3997	12.0247	11.6997
906	20.1495	12.3497	24.3744	10.7247	12.0247	11.6997
907	20.1495	12.0247	24.0494	10.3997	12.0247	12.0247
908	20.1495	12.0247	24.6994	10.7247	12.0247	11.6997
909	20.1495	12.3497	24.6994	10.0747	12.0247	11.6997
910	20.1495	12.3497	24.0494	10.7247	12.0247	12.0247
911	20.1495	12.3497	24.6994	10.3997	12.0247	11.6997
912	20.1495	12.3497	24.6994	10.7247	11.6997	12.0247
913	20.1495	12.3497	24.6994	10.3997	12.0247	11.3747
914	20.1495	12.3497	24.3744	10.3997	11.6997	11.6997
915	20.1495	12.3497	24.6994	10.7247	11.6997	11.6997
916	20.1495	12.0247	24.6994	10.0747	11.3747	11.6997
917	20.1495	12.3497	24.3744	11.0497	11.6997	11.6997
918	20.1495	12.9997	24.3744	10.3997	12.0247	12.0247
919	20.1495	12.6747	25.0244	10.7247	11.6997	12.0247
920	20.1495	12.3497	24.6994	10.7247	11.6997	12.0247
921	20.1495	12.3497	24.3744	10.7247	11.6997	12.0247
922	20.1495	12.6747	24.3744	10.3997	12.0247	12.0247
923	20.1495	12.3497	24.6994	10.3997	11.6997	12.3497
924	20.1495	12.0247	24.3744	11.0497	11.6997	12.0247
925	20.1495	12.6747	24.6994	10.7247	11.6997	12.3497
926	20.1495	12.3497	24.6994	10.7247	11.6997	12.0247
927	20.1495	12.3497	24.6994	10.3997	12.0247	12.0247
928	20.1495	12.0247	24.3744	10.3997	12.0247	12.0247
929	20.1495	12.0247	24.6994	10.3997	11.6997	12.0247
930	20.1495	12.3497	24.6994	10.3997	11.6997	12.0247
931	20.1495	12.0247	24.6994	10.3997	11.6997	12.0247
932	20.1495	12.3497	24.3744	10.3997	12.0247	11.6997
933	20.1495	12.3497	24.6994	10.0747	12.0247	12.3497
934	20.1495	12.0247	24.3744	11.0497	12.0247	12.0247
935	20.1495	12.3497	24.6994	10.3997	12.0247	12.0247
936	20.1495	12.3497	25.0244	10.3997	11.6997	12.0247
937	20.1495	12.3497	24.6994	10.0747	12.0247	12.0247
938	20.1495	12.6747	24.6994	10.3997	12.0247	12.0247
939	20.1495	12.3497	24.6994	10.3997	12.0247	12.0247
940	20.7995	12.0247	24.3744	10.7247	12.0247	12.0247
941	20.1495	12.6747	24.6994	10.3997	12.0247	12.0247
942	20.1495	12.0247	24.3744	10.7247	12.0247	12.0247
943	20.1495	12.0247	24.6994	10.3997	12.0247	12.3497
944	20.1495	12.3497	24.6994	10.3997	12.0247	12.0247
945	20.1495	12.3497	24.6994	10.0747	12.0247	11.6997
946	20.1495	12.3497	24.6994	10.3997	12.0247	12.0247
947	20.1495	12.6747	24.6994	10.3997	12.0247	11.6997
948	20.1495	12.3497	24.6994	10.3997	12.0247	11.6997
949	20.1495	12.3497	24.6994	10.7247	12.0247	11.6997
950	20.1495	12.3497	24.6994	10.3997	12.0247	11.6997
951	20.1495	12.3497	24.6994	10.3997	12.0247	11.6997
952	20.1495	12.6747	24.6994	10.3997	11.6997	12.0247
953	20.1495	12.3497	24.6994	10.3997	12.0247	12.0247
954	20.1495	12.0247	24.6994	10.3997	12.0247	12.0247
955	20.1495	12.6747	24.3744	10.3997	11.6997	12.0247
956	20.1495	12.3497	24.6994	10.7247	12.0247	12.0247
957	20.1495	12.3497	24.3744	10.3997	12.0247	12.6747
958	20.1495	12.3497	24.6994	10.3997	12.0247	12.0247
959	20.1495	12.3497	24.6994	10.3997	12.0247	11.6997
960	20.4745	12.3497	24.3744	10.3997	12.0247	11.6997
961	20.1495	12.6747	24.6994	10.3997	12.3497	12.3497
962	20.4745	12.3497	24.6994	10.0747	12.3497	11.6997
963	20.1495	12.6747	24.3744	10.3997	12.3497	11.6997
964	20.1495	12.3497	24.6994	10.3997	12.3497	12.0247
965	20.1495	12.3497	24.3744	10.3997	12.3497	12.0247
966	20.1495	12.3497	24.3744	10.3997	12.3497	12.0247
967	20.1495	12.3497	24.6994	10.0747	12.3497	12.3497
968	20.1495	12.3497	24.6994	10.7247	12.3497	12.0247
969	20.1495	12.3497	24.6994	10.3997	12.3497	12.0247
970	20.1495	12.3497	25.0244	10.7247	12.3497	11.6997
971	20.1495	12.6747	24.6994	10.0747	12.3497	12.3497
972	20.1495	12.3497	24.6994	10.3997	12.3497	12.0247
973	20.1495	12.3497	25.0244	10.3997	12.3497	11.6997
974	20.1495	12.3497	24.3744	10.3997	12.3497	11.6997
975	20.1495	12.3497	24.3744	10.7247	12.3497	12.0247
976	20.1495	12.6747	24.3744	10.0747	12.3497	11.6997
977	20.1495	12.3497	24.6994	10.3997	12.3497	12.0247
978	20.1495	12.6747	25.0244	10.3997	12.3497	12.0247
979	20.1495	12.6747	24.0494	10.3997	12.3497	12.3497
980	20.1495	12.9997	25.0244	11.0497	12.3497	12.3497
981	20.1495	12.3497	24.3744	10.3997	12.0247	12.0247
982	20.1495	12.6747	24.6994	10.3997	12.3497	11.6997
983	20.1495	12.3497	25.0244	10.3997	12.3497	11.6997
984	20.1495	12.3497	25.0244	10.3997	12.3497	11.6997
985	20.1495	12.3497	24.3744	10.0747	12.3497	12.3497
986	20.4745	12.6747	24.6994	10.3997	12.3497	12.0247
987	20.1495	12.0247	24.6994	10.3997	12.3497	11.6997
988	20.1495	12.3497	24.6994	10.3997	12.3497	12.0247
989	20.1495	12.3497	25.0244	10.3997	12.3497	12.0247
990	20.1495	12.3497	24.6994	10.3997	12.0247	12.0247
991	20.1495	12.6747	25.0244	10.7247	12.3497	11.6997
992	20.1495	12.6747	25.3494	10.3997	12.3497	12.3497
993	20.4745	12.6747	24.6994	10.3997	12.3497	12.0247
994	20.4745	12.6747	24.6994	10.0747	12.3497	12.0247
995	20.1495	12.3497	24.6994	10.7247	12.3497	12.0247
996	20.4745	12.3497	24.3744	10.3997	12.6747	11.6997
997	20.1495	12.3497	24.6994	10.0747	12.3497	12.0247
998	20.1495	12.6747	25.0244	10.3997	12.3497	12.0247
999	20.1495	12.6747	25.0244	10.3997	12.3497	12.0247
1000	20.1495	12.3497	24.6994	10.3997	12.3497	12.3497
1001	20.1495	12.9997	25.0244	10.3997	12.3497	12.6747
1002	20.4745	12.6747	25.0244	10.3997	12.3497	12.0247
1003	20.1495	12.3497	25.0244	10.0747	12.3497	12.3497
1004	20.1495	12.6747	25.0244	10.3997	12.3497	12.0247
1005	20.1495	12.0247	24.6994	10.3997	12.3497	12.0247
1006	20.4745	12.6747	25.0244	10.7247	12.3497	12.0247
1007	20.1495	12.6747	24.6994	10.0747	12.3497	12.3497
1008	20.1495	12.3497	24.6994	10.3997	12.3497	12.3497
1009	20.4745	12.6747	25.0244	10.7247	12.3497	12.0247
1010	20.1495	13.3247	25.0244	10.3997	12.3497	11.6997
1011	20.4745	12.9997	24.6994	10.3997	12.3497	11.6997
1012	20.1495	12.3497	25.0244	10.3997	12.3497	11.6997
1013	20.1495	12.6747	25.0244	10.3997	12.3497	12.3497
1014	20.1495	12.6747	24.3744	10.3997	12.3497	12.0247
1015	20.1495	12.6747	24.6994	10.0747	12.3497	11.6997
1016	20.1495	13.3247	24.3744	10.3997	12.3497	11.6997
1017	20.1495	12.6747	25.0244	10.3997	12.3497	11.6997
1018	20.4745	12.3497	25.0244	10.3997	12.3497	11.3747
1019	20.1495	12.6747	25.0244	10.0747	12.3497	11.6997
1020	20.4745	12.6747	24.6994	10.3997	12.3497	11.6997
1021	20.4745	12.9997	24.6994	10.0747	12.3497	11.6997
1022	20.4745	12.6747	25.0244	10.3997	12.3497	11.6997
1023	20.4745	12.3497	25.0244	10.3997	12.3497	11.6997
1024	20.1495	12.6747	25.0244	10.3997	12.0247	11.3747
1025	20.4745	12.3497	24.6994	10.0747	12.3497	12.0247
1026	20.1495	12.6747	24.6994	10.0747	12.3497	12.0247
1027	20.1495	12.3497	25.3494	10.3997	12.6747	12.0247
1028	20.4745	12.3497	25.0244	10.3997	12.6747	11.6997
1029	20.1495	12.9997	25.0244	10.0747	12.6747	11.6997
1030	20.1495	13.3247	24.6994	10.0747	12.3497	11.6997
1031	20.1495	12.9997	25.0244	9.74976	12.6747	12.0247
1032	20.4745	12.6747	25.0244	10.7247	12.6747	12.0247
1033	20.4745	12.6747	24.6994	10.3997	12.6747	12.0247
1034	20.1495	12.9997	25.0244	10.0747	12.0247	11.6997
1035	20.1495	12.6747	25.0244	10.3997	12.3497	11.6997
1036	20.1495	12.9997	24.6994	10.3997	12.3497	11.6997
1037	20.1495	12.3497	25.0244	10.0747	12.3497	11.6997
1038	20.1495	12.6747	25.0244	10.7247	12.6747	11.6997
1039	20.1495	12.3497	25.0244	10.3997	12.3497	12.0247
1040	20.1495	12.6747	25.0244	10.7247	12.3497	12.0247
1041	20.4745	12.6747	24.3744	10.0747	12.6747	11.6997
1042	20.7995	12.6747	24.6994	10.7247	12.3497	11.6997
1043	20.4745	12.6747	24.6994	11.0497	12.3497	11.6997
1044	21.1245	12.6747	25.0244	11.0497	12.3497	11.6997
1045	20.4745	12.6747	25.0244	11.0497	12.3497	11.6997
1046	20.4745	12.6747	24.6994	10.7247	12.3497	12.0247
1047	20.1495	12.6747	24.3744	11.0497	12.6747	11.6997
1048	20.1495	12.6747	24.6994	11.0497	12.6747	12.0247
1049	20.1495	12.6747	25.0244	10.7247	12.3497	11.3747
1050	19.8245	12.6747	24.6994	10.7247	12.6747	11.3747
1051	20.1495	12.6747	25.0244	10.7247	12.0247	12.0247
1052	20.4745	12.6747	24.6994	11.0497	12.6747	11.6997
1053	20.1495	12.3497	24.6994	11.0497	12.3497	11.3747
1054	20.1495	12.3497	25.0244	10.7247	12.0247	12.0247
1055	20.1495	12.9997	24.3744	11.0497	12.3497	12.0247
1056	19.8245	12.6747	25.0244	11.0497	12.0247	12.0247
1057	20.1495	12.6747	25.0244	10.3997	12.3497	11.6997
1058	20.4745	12.6747	25.0244	10.3997	12.3497	11.6997
1059	20.4745	12.3497	25.0244	10.7247	12.3497	11.6997
1060	20.1495	12.3497	25.0244	11.0497	12.3497	12.0247
1061	20.1495	12.6747	25.0244	10.7247	12.3497	11.6997
1062	20.4745	12.3497	25.0244	11.0497	12.0247	12.0247
1063	20.4745	12.6747	25.3494	11.3747	12.0247	12.0247
1064	20.1495	12.6747	24.6994	10.7247	12.0247	12.0247
1065	20.1495	12.3497	25.0244	11.0497	12.3497	11.6997
1066	20.1495	12.6747	25.0244	11.0497	12.6747	11.3747
1067	20.1495	12.6747	24.3744	10.7247	12.3497	12.0247
1068	20.1495	12.6747	25.0244	11.0497	12.3497	11.3747
1069	20.1495	12.6747	25.0244	10.7247	12.6747	11.6997
1070	20.1495	12.3497	24.6994	10.7247	12.6747	12.0247
1071	20.1495	12.6747	25.0244	11.0497	12.3497	12.0247
1072	20.1495	12.6747	24.6994	11.6997	12.3497	12.0247
1073	20.1495	12.0247	25.0244	11.0497	12.0247	11.6997
1074	20.1495	12.3497	25.3494	11.3747	12.3497	12.0247
1075	20.1495	12.6747	24.6994	11.3747	12.3497	11.6997
1076	19.8245	12.6747	25.0244	10.7247	11.6997	11.6997
1077	20.4745	12.6747	25.0244	11.3747	12.0247	12.0247
1078	20.1495	12.6747	25.0244	10.7247	12.3497	11.6997
1079	20.1495	12.9997	25.0244	10.7247	12.0247	11.6997
1080	20.1495	12.6747	25.0244	11.0497	12.3497	12.0247
1081	20.1495	12.6747	25.3494	11.0497	12.0247	11.3747
1082	19.8245	12.6747	25.0244	10.7247	11.6997	11.6997
1083	20.1495	12.6747	25.0244	10.7247	12.0247	11.6997
1084	20.1495	12.3497	24.6994	11.3747	12.0247	11.6997
1085	20.1495	12.6747	25.0244	11.0497	11.6997	12.0247
1086	20.1495	12.6747	24.6994	11.0497	12.0247	11.3747
1087	20.1495	12.6747	25.0244	11.0497	12.0247	11.6997
1088	20.1495	12.3497	25.0244	11.0497	12.0247	12.0247
1089	20.1495	12.3497	25.0244	10.7247	12.0247	12.0247
1090	20.1495	12.3497	25.0244	11.3747	12.0247	11.6997
1091	20.1495	12.0247	24.6994	11.0497	12.0247	11.3747
1092	20.1495	12.0247	25.0244	10.7247	12.0247	12.0247
1093	20.1495	12.3497	25.3494	11.0497	12.0247	12.0247
1094	20.1495	12.6747	24.6994	10.7247	12.0247	12.0247
1095	20.1495	12.3497	24.6994	11.0497	11.6997	11.6997
1096	19.8245	12.0247	25.0244	10.7247	12.0247	12.0247
1097	20.1495	12.3497	25.0244	10.7247	12.0247	11.6997
1098	20.1495	12.3497	24.6994	10.7247	12.0247	11.3747
1099	20.1495	12.6747	24.3744	11.0497	12.0247	11.6997
1100	19.8245	12.3497	25.3494	10.7247	12.0247	12.0247
1101	20.1495	12.3497	25.0244	11.3747	11.6997	11.6997
1102	20.4745	12.6747	25.0244	11.0497	12.0247	12.0247
1103	20.4745	12.3497	24.6994	11.0497	12.0247	12.0247
1104	20.1495	12.3497	25.0244	11.0497	11.6997	12.3497
1105	20.1495	12.3497	24.6994	11.0497	12.0247	12.0247
1106	19.8245	12.6747	25.0244	11.0497	12.0247	12.0247
1107	19.8245	12.6747	25.0244	11.3747	12.0247	11.6997
1108	20.1495	12.6747	25.0244	11.0497	12.0247	12.0247
1109	19.8245	12.3497	24.6994	10.7247	12.0247	11.6997
1110	19.8245	12.6747	25.0244	11.3747	11.6997	12.0247
1111	20.1495	12.3497	25.0244	10.7247	12.0247	12.0247
1112	20.1495	12.6747	25.0244	11.0497	12.0247	11.6997
1113	20.1495	12.3497	24.6994	11.0497	12.0247	12.0247
1114	20.1495	12.3497	25.0244	11.0497	12.0247	12.0247
1115	20.1495	12.3497	24.6994	11.0497	12.3497	12.0247
1116	20.4745	12.0247	25.3494	11.3747	12.0247	12.0247
1117	19.8245	12.3497	24.6994	11.3747	11.6997	11.6997
1118	19.8245	12.6747	24.3744	11.3747	12.0247	12.0247
1119	20.1495	12.3497	25.0244	11.3747	12.0247	11.6997
1120	19.8245	12.3497	25.0244	10.7247	11.6997	11.6997
1121	20.4745	12.6747	24.6994	11.0497	12.0247	11.6997
1122	19.8245	12.3497	24.6994	11.0497	12.0247	11.6997
1123	20.1495	12.6747	25.0244	10.7247	12.0247	12.0247
1124	20.1495	12.6747	24.6994	11.3747	12.0247	12.0247
1125	20.1495	12.6747	24.6994	10.7247	11.6997	12.0247
1126	20.1495	12.3497	25.0244	11.0497	12.0247	12.0247
1127	20.1495	12.6747	25.0244	10.7247	12.0247	12.0247
1128	20.1495	12.3497	25.0244	11.0497	12.0247	11.6997
1129	20.1495	12.6747	25.0244	11.0497	12.0247	12.0247
1130	20.1495	12.6747	24.6994	11.0497	12.0247	12.0247
1131	20.1495	12.6747	25.0244	11.3747	12.0247	11.6997
1132	20.4745	12.3497	25.0244	11.0497	12.0247	11.6997
1133	20.1495	12.9997	25.3494	11.3747	12.0247	11.6997
1134	20.1495	12.9997	25.0244	11.3747	12.0247	11.3747
1135	20.1495	12.9997	25.3494	10.7247	12.0247	12.0247
1136	20.1495	12.6747	25.0244	11.0497	12.0247	12.0247
1137	20.1495	12.6747	25.0244	11.0497	12.0247	12.3497
1138	20.1495	12.6747	25.0244	11.3747	12.0247	12.0247
1139	20.1495	12.6747	25.0244	11.0497	12.0247	12.3497
1140	20.1495	12.6747	25.3494	10.7247	12.3497	12.0247
1141	20.1495	12.6747	25.0244	11.3747	12.3497	12.0247
1142	20.1495	12.6747	25.3494	11.0497	12.0247	12.0247
1143	20.1495	12.6747	25.0244	11.0497	12.0247	12.0247
1144	20.1495	12.6747	25.0244	10.3997	12.0247	12.0247
1145	20.1495	12.3497	25.3494	11.3747	12.3497	12.0247
1146	20.1495	12.3497	25.0244	11.0497	12.0247	12.0247
1147	20.1495	12.6747	25.0244	11.0497	12.3497	12.0247
1148	20.1495	12.3497	25.3494	11.3747	12.0247	12.0247
1149	20.1495	12.6747	24.6994	11.0497	12.0247	12.0247
1150	20.1495	12.6747	24.6994	10.7247	12.0247	11.6997
1151	20.1495	12.6747	25.0244	11.3747	12.0247	11.6997
1152	20.1495	12.6747	25.0244	11.0497	12.0247	11.6997
1153	20.1495	12.3497	25.0244	11.0497	12.0247	11.6997
1154	20.4745	12.3497	25.0244	11.0497	12.0247	12.0247
1155	20.1495	12.3497	25.0244	11.0497	12.0247	12.0247
1156	20.1495	12.3497	25.0244	11.0497	12.3497	12.0247
1157	20.1495	12.0247	25.0244	11.0497	12.3497	11.6997
1158	19.8245	12.3497	25.0244	11.0497	12.0247	12.0247
1159	20.1495	12.0247	25.0244	11.3747	12.0247	11.6997
1160	20.1495	12.3497	25.3494	11.0497	12.3497	11.6997
1161	20.1495	12.6747	25.0244	10.7247	12.0247	11.6997
1162	20.1495	12.9997	25.0244	11.0497	12.3497	11.6997
1163	20.1495	12.3497	25.0244	11.0497	12.0247	12.0247
1164	20.1495	12.6747	25.6744	11.3747	12.3497	12.0247
1165	20.1495	12.0247	25.0244	11.0497	12.0247	12.0247
1166	20.1495	12.3497	25.3494	11.0497	12.0247	11.6997
1167	20.1495	12.6747	25.0244	11.0497	12.0247	12.0247
1168	20.1495	12.3497	25.3494	11.3747	12.0247	11.6997
1169	20.1495	12.3497	25.0244	11.0497	12.0247	11.6997
1170	20.1495	12.6747	25.0244	11.0497	12.0247	11.6997
1171	20.1495	12.6747	25.0244	11.0497	12.0247	11.6997
1172	20.1495	12.6747	25.0244	11.3747	11.6997	11.6997
1173	20.1495	12.3497	25.0244	11.0497	12.3497	11.6997
1174	20.1495	12.9997	25.0244	11.3747	12.0247	11.6997
1175	20.1495	12.6747	25.0244	11.3747	12.0247	12.0247
1176	20.1495	12.6747	25.3494	11.3747	12.0247	11.6997
1177	20.1495	12.6747	25.0244	11.0497	12.3497	11.6997
1178	20.1495	12.6747	25.0244	11.0497	12.0247	12.0247
1179	20.4745	12.6747	25.0244	11.0497	12.0247	11.6997
1180	20.1495	12.6747	25.0244	11.0497	12.0247	11.6997
1181	20.1495	12.9997	25.0244	11.3747	12.0247	11.6997
1182	20.1495	12.9997	25.0244	11.3747	12.3497	11.3747
1183	20.1495	12.6747	25.0244	11.0497	12.3497	12.0247
1184	20.1495	12.6747	25.3494	11.3747	12.0247	11.6997
1185	20.1495	12.9997	25.0244	11.0497	12.3497	11.6997
1186	20.1495	12.6747	25.0244	11.0497	12.3497	11.6997
1187	20.1495	12.9997	25.0244	11.0497	12.3497	11.3747
1188	20.1495	12.3497	25.0244	11.3747	12.3497	12.0247
1189	20.1495	12.9997	25.0244	11.3747	12.3497	11.6997
1190	20.1495	12.3497	25.0244	11.3747	12.3497	11.6997
1191	20.1495	12.6747	25.0244	11.3747	12.3497	12.0247
1192	20.1495	12.6747	25.0244	11.0497	12.3497	11.6997
1193	20.1495	12.6747	25.0244	11.0497	12.3497	11.6997
1194	20.1495	12.6747	25.0244	11.6997	12.0247	12.0247
1195	20.1495	12.6747	25.0244	11.3747	12.3497	11.6997
1196	20.1495	12.6747	25.0244	11.0497	12.3497	11.6997
1197	20.1495	12.6747	25.0244	11.0497	12.0247	11.6997
1198	20.1495	12.9997	25.0244	11.3747	12.3497	11.3747
1199	20.1495	12.6747	25.0244	11.3747	12.0247	11.6997
1200	20.1495	12.6747	25.0244	11.0497	11.6997	11.6997
1201	20.1495	12.3497	25.3494	11.3747	12.0247	11.3747
1202	20.1495	12.6747	25.0244	10.7247	12.0247	11.6997
1203	20.1495	12.3497	25.0244	11.0497	12.0247	11.3747
1204	20.1495	12.6747	25.0244	11.3747	12.0247	11.6997
1205	20.1495	12.3497	25.3494	11.0497	11.6997	11.6997
1206	20.1495	12.3497	25.0244	11.0497	11.6997	11.6997
1207	20.1495	12.6747	25.0244	11.0497	12.0247	11.6997
1208	20.1495	12.6747	25.0244	10.7247	12.0247	11.6997
1209	20.4745	12.3497	24.6994	10.7247	11.6997	11.6997
1210	20.4745	12.6747	25.3494	11.0497	12.0247	12.0247
1211	20.1495	12.9997	25.3494	11.0497	12.0247	11.6997
1212	20.1495	12.3497	25.0244	11.3747	12.0247	11.6997
1213	20.4745	12.3497	25.0244	11.0497	12.0247	11.6997
1214	20.1495	12.3497	25.0244	11.3747	12.0247	11.6997
1215	20.4745	12.6747	25.0244	11.3747	12.0247	11.6997
1216	20.1495	12.3497	25.0244	11.3747	12.0247	11.6997
1217	20.1495	12.6747	25.0244	11.0497	12.0247	12.0247
1218	20.1495	12.3497	25.0244	11.6997	12.0247	11.6997
1219	20.1495	12.3497	25.0244	11.0497	12.0247	11.6997
1220	20.4745	12.6747	25.0244	11.3747	12.0247	11.6997
1221	20.1495	12.6747	25.3494	11.0497	12.0247	11.6997
1222	20.1495	12.6747	25.0244	11.0497	12.0247	12.0247
1223	20.1495	12.6747	25.3494	11.0497	12.0247	11.6997
1224	20.1495	12.9997	25.0244	11.0497	12.0247	11.6997
1225	20.1495	12.3497	25.0244	11.0497	12.0247	11.6997
1226	20.1495	12.6747	25.3494	11.3747	12.3497	11.6997
1227	20.1495	12.6747	25.0244	11.0497	12.3497	11.6997
1228	20.1495	12.3497	25.0244	11.3747	12.3497	11.3747
1229	20.1495	12.6747	25.0244	11.3747	12.3497	11.6997
1230	20.1495	12.3497	25.0244	11.0497	12.3497	11.6997
1231	20.1495	12.3497	25.0244	11.0497	12.3497	11.3747
1232	20.1495	12.6747	25.3494	11.0497	12.3497	11.6997
1233	20.1495	12.6747	25.0244	11.3747	12.6747	11.6997
1234	20.1495	12.3497	25.3494	11.3747	12.6747	12.0247
1235	20.1495	12.3497	25.3494	11.0497	12.3497	11.3747
1236	20.1495	12.3497	25.3494	11.0497	12.6747	11.6997
1237	20.1495	12.6747	25.0244	11.3747	12.3497	11.6997
1238	20.1495	12.6747	25.0244	11.0497	12.6747	11.6997
1239	20.1495	12.3497	25.0244	10.7247	12.6747	11.3747
1240	20.1495	12.6747	25.0244	11.0497	12.6747	11.6997
1241	20.1495	12.6747	25.3494	11.0497	12.3497	11.3747
1242	20.1495	12.6747	25.3494	11.0497	12.6747	11.6997
1243	20.1495	12.6747	25.0244	11.3747	12.6747	11.6997
1244	20.1495	12.6747	25.3494	11.3747	12.6747	11.6997
1245	20.1495	12.3497	25.3494	11.0497	12.3497	11.6997
1246	20.1495	12.3497	25.0244	11.3747	12.3497	11.3747
1247	20.1495	12.6747	25.0244	11.3747	12.6747	11.3747
1248	20.1495	12.6747	25.0244	11.3747	12.3497	11.6997
1249	20.1495	12.6747	25.0244	10.7247	12.3497	11.3747
1250	20.1495	12.6747	25.0244	11.0497	12.3497	11.3747
1251	20.1495	12.6747	25.3494	11.3747	12.3497	11.6997
1252	20.1495	12.6747	25.0244	11.3747	12.6747	11.6997
1253	20.1495	12.3497	25.3494	11.3747	12.3497	11.3747
1254	20.1495	12.6747	25.0244	11.0497	12.6747	11.3747
1255	20.1495	12.6747	25.0244	11.6997	12.3497	11.6997
1256	20.1495	12.6747	25.3494	11.0497	12.3497	11.3747
1257	20.1495	13.3247	25.0244	11.3747	12.6747	11.3747
1258	20.1495	12.9997	25.3494	11.0497	12.3497	11.3747
1259	20.1495	12.3497	25.0244	11.0497	12.6747	11.6997
1260	20.1495	12.9997	25.3494	11.3747	12.3497	11.6997
1261	20.1495	12.9997	25.3494	11.0497	12.3497	11.6997
1262	20.1495	12.6747	25.0244	11.0497	12.3497	11.6997
1263	20.1495	12.6747	25.0244	11.0497	12.3497	11.6997
1264	20.1495	12.6747	25.3494	11.0497	12.6747	11.6997
1265	20.1495	12.9997	25.3494	10.7247	12.3497	11.6997
1266	20.1495	12.3497	25.9994	11.0497	12.3497	11.6997
1267	20.1495	12.6747	25.3494	11.3747	12.3497	11.6997
1268	20.1495	12.6747	25.0244	11.0497	12.3497	12.0247
1269	20.1495	12.3497	25.0244	11.0497	12.3497	11.6997
1270	20.1495	12.3497	25.0244	10.7247	12.3497	11.6997
1271	20.1495	12.3497	25.0244	11.6997	12.6747	11.3747
1272	20.4745	12.3497	25.3494	10.7247	12.6747	11.6997
1273	20.1495	12.6747	25.0244	11.0497	12.3497	12.0247
1274	20.1495	12.6747	25.3494	11.0497	12.6747	11.6997
1275	20.1495	12.3497	25.3494	10.7247	12.3497	11.6997
1276	20.1495	12.0247	25.3494	11.0497	12.9997	12.0247
1277	20.1495	12.3497	25.0244	11.3747	12.3497	11.6997
1278	20.1495	12.3497	25.3494	11.0497	12.6747	11.6997
1279	20.1495	12.6747	25.0244	11.3747	12.6747	12.0247
1280	20.1495	12.6747	25.3494	11.0497	12.9997	11.6997
1281	20.1495	12.3497	25.0244	11.0497	12.3497	11.6997
1282	20.1495	12.9997	25.0244	11.3747	12.3497	11.6997
1283	20.1495	12.3497	25.3494	11.6997	12.6747	11.6997
1284	20.1495	12.3497	25.3494	12.0247	12.6747	11.6997
1285	20.1495	12.3497	25.3494	11.6997	12.6747	11.6997
1286	20.1495	12.9997	25.0244	11.6997	12.6747	11.3747
1287	20.1495	12.6747	25.0244	11.3747	12.6747	12.0247
1288	20.1495	12.3497	25.0244	11.0497	12.3497	12.0247
1289	20.1495	12.3497	25.0244	11.6997	12.6747	11.3747
1290	20.1495	12.0247	25.3494	11.6997	12.3497	11.6997
1291	20.1495	12.3497	25.0244	12.0247	12.3497	11.6997
1292	20.1495	12.0247	25.0244	11.3747	12.3497	11.6997
1293	20.1495	12.3497	25.0244	11.0497	12.3497	11.6997
1294	20.1495	12.0247	25.0244	11.6997	12.3497	12.0247
1295	20.1495	12.0247	25.0244	11.3747	12.3497	12.0247
1296	20.1495	12.0247	25.3494	11.3747	12.3497	12.0247
1297	20.1495	12.6747	25.0244	11.0497	12.3497	11.6997
1298	20.1495	12.6747	25.3494	11.3747	12.3497	11.6997
1299	20.1495	12.6747	25.0244	11.0497	12.3497	12.0247
1300	20.1495	12.6747	25.0244	11.0497	12.3497	11.6997
1301	20.1495	12.6747	25.3494	11.0497	12.3497	11.6997
1302	20.1495	12.3497	25.0244	11.0497	12.3497	12.0247
1303	20.1495	12.6747	25.0244	12.0247	12.3497	11.6997
1304	20.1495	12.6747	25.0244	11.0497	12.3497	11.6997
1305	20.1495	12.3497	25.0244	12.0247	12.3497	12.0247
1306	20.1495	12.6747	25.0244	11.3747	12.3497	12.0247
1307	20.1495	12.6747	25.0244	11.3747	12.3497	11.6997
1308	20.1495	12.6747	25.0244	11.3747	12.0247	11.6997
1309	20.4745	12.6747	25.0244	11.0497	12.0247	12.0247
1310	20.1495	12.9997	25.0244	11.0497	12.0247	11.6997
1311	20.1495	12.6747	25.3494	11.3747	12.0247	12.0247
1312	20.1495	12.6747	25.3494	11.3747	12.3497	11.3747
1313	20.1495	12.6747	25.0244	11.0497	12.0247	12.0247
1314	20.1495	12.6747	25.0244	11.3747	12.3497	11.6997
1315	20.1495	12.6747	25.3494	11.3747	12.0247	12.0247
1316	20.1495	12.6747	25.0244	11.3747	12.6747	12.0247
1317	20.1495	12.6747	25.0244	11.0497	12.0247	11.6997
1318	20.1495	12.6747	25.0244	12.0247	12.3497	11.6997
1319	20.1495	12.6747	25.0244	11.0497	12.0247	11.6997
1320	20.1495	12.6747	25.0244	11.3747	12.0247	11.6997
1321	20.1495	12.9997	25.0244	11.3747	12.3497	11.6997
1322	20.1495	12.6747	25.0244	11.3747	12.0247	12.0247
1323	20.1495	12.9997	25.0244	11.3747	12.0247	12.0247
1324	20.1495	12.6747	25.0244	11.6997	12.3497	11.6997
1325	20.1495	12.9997	25.3494	11.0497	12.3497	11.3747
1326	20.1495	12.3497	25.3494	11.0497	12.0247	11.6997
1327	20.1495	12.9997	25.3494	11.3747	12.3497	11.6997
1328	20.1495	12.6747	25.0244	11.0497	12.6747	12.0247
1329	20.1495	12.9997	25.0244	11.6997	12.3497	11.6997
1330	19.8245	12.6747	25.0244	11.3747	12.6747	11.6997
1331	20.1495	12.6747	25.3494	11.3747	12.3497	11.6997
1332	20.1495	12.6747	25.3494	11.3747	12.3497	11.6997
1333	20.4745	12.3497	25.0244	11.3747	12.3497	11.3747
1334	20.1495	12.9997	25.0244	11.3747	12.0247	11.6997
1335	20.1495	12.6747	25.0244	11.6997	12.0247	11.6997
1336	20.1495	12.9997	25.0244	11.0497	12.6747	12.0247
1337	20.1495	12.6747	25.0244	11.3747	12.0247	11.6997
1338	20.1495	12.3497	25.0244	11.3747	12.3497	11.6997
1339	20.1495	12.9997	25.0244	11.6997	12.0247	12.0247
1340	20.1495	12.6747	25.0244	11.3747	12.3497	11.6997
1341	20.1495	12.9997	25.0244	11.3747	12.0247	11.3747
1342	20.1495	12.6747	25.0244	11.6997	12.0247	11.3747
1343	20.1495	12.6747	25.0244	11.0497	12.0247	11.3747
1344	20.1495	12.6747	25.0244	11.3747	12.3497	11.3747
1345	20.1495	12.6747	25.0244	11.0497	12.0247	12.0247
1346	20.1495	12.9997	25.0244	11.3747	12.0247	12.0247
1347	20.1495	12.6747	25.0244	11.3747	12.0247	11.3747
1348	20.1495	12.9997	25.0244	11.3747	12.0247	11.6997
1349	20.1495	12.6747	25.0244	11.0497	12.0247	11.6997
1350	20.1495	12.6747	25.0244	11.0497	12.3497	11.6997
1351	20.1495	12.6747	25.0244	11.3747	12.0247	11.6997
1352	20.1495	12.6747	25.3494	10.7247	11.6997	11.6997
1353	20.1495	12.3497	25.0244	11.0497	12.0247	11.6997
1354	20.1495	12.3497	25.0244	11.0497	12.0247	11.6997
1355	20.1495	12.6747	25.0244	11.0497	12.0247	11.6997
1356	20.1495	12.6747	25.0244	11.3747	12.0247	12.0247
1357	20.1495	12.9997	25.0244	11.0497	12.0247	11.6997
1358	20.1495	12.6747	25.3494	11.3747	12.0247	12.0247
1359	19.8245	12.3497	25.0244	11.0497	11.6997	11.6997
1360	20.1495	12.6747	25.0244	11.0497	11.6997	11.6997
1361	20.1495	12.9997	25.0244	11.0497	11.6997	11.6997
1362	20.1495	12.6747	25.0244	11.0497	11.6997	11.6997
1363	20.1495	12.6747	25.0244	10.7247	12.0247	11.6997
1364	20.1495	12.9997	25.0244	11.0497	12.0247	11.6997
1365	19.8245	12.6747	25.0244	11.0497	12.0247	11.6997
1366	20.1495	12.6747	25.0244	11.3747	12.0247	11.3747
1367	20.1495	12.9997	25.0244	10.7247	12.0247	11.3747
1368	19.4995	12.6747	25.0244	11.3747	12.0247	11.6997
1369	20.1495	12.0247	25.0244	11.0497	12.0247	11.6997
1370	20.1495	12.6747	25.0244	11.3747	12.0247	11.6997
1371	19.8245	12.6747	25.3494	11.3747	12.0247	11.6997
1372	20.1495	12.6747	25.0244	11.3747	12.3497	11.3747
1373	20.1495	12.6747	25.0244	11.3747	11.6997	11.6997
1374	19.8245	12.6747	25.0244	11.3747	12.0247	11.6997
1375	19.8245	12.6747	24.6994	11.3747	12.3497	11.3747
1376	20.1495	12.6747	25.0244	11.3747	12.0247	11.3747
1377	19.4995	12.6747	25.0244	11.0497	12.3497	11.6997
1378	20.1495	12.6747	25.0244	11.3747	12.0247	11.6997
1379	19.8245	12.6747	25.0244	11.0497	12.6747	11.6997
1380	20.1495	12.9997	25.0244	11.3747	12.6747	11.6997
1381	19.4995	12.3497	25.0244	11.3747	12.3497	11.6997
1382	19.8245	12.9997	25.0244	11.3747	12.0247	11.6997
1383	20.1495	12.6747	25.0244	11.3747	12.3497	11.3747
1384	20.1495	12.6747	25.0244	11.6997	12.0247	11.6997
1385	20.1495	12.6747	25.0244	11.0497	12.0247	11.6997
1386	19.8245	12.6747	25.0244	11.3747	12.0247	12.0247
1387	19.8245	12.6747	25.0244	11.3747	12.3497	11.6997
1388	20.1495	12.6747	25.0244	11.3747	12.3497	11.3747
1389	19.8245	12.3497	25.0244	11.3747	12.0247	11.6997
1390	20.1495	12.3497	25.3494	11.3747	12.6747	11.6997
1391	20.1495	12.6747	25.0244	11.3747	12.3497	11.6997
1392	20.1495	13.3247	25.0244	11.6997	12.3497	11.6997
1393	19.8245	12.6747	25.3494	11.6997	12.3497	11.3747
1394	20.1495	12.9997	25.0244	11.3747	12.6747	11.3747
1395	20.1495	12.6747	25.0244	11.3747	12.6747	11.3747
1396	19.8245	12.9997	25.0244	12.0247	12.6747	11.6997
1397	20.1495	12.3497	25.0244	11.6997	12.3497	11.6997
1398	19.8245	12.3497	25.0244	11.3747	12.6747	11.3747
1399	20.1495	12.9997	25.3494	11.3747	12.3497	11.3747
1400	20.1495	12.9997	25.0244	11.0497	12.6747	12.0247
1401	20.1495	12.6747	25.0244	11.0497	12.6747	11.6997
1402	20.1495	12.3497	25.0244	11.3747	12.9997	11.6997
1403	19.8245	12.6747	25.0244	11.3747	12.6747	12.0247
1404	20.1495	12.6747	25.0244	11.3747	12.6747	11.6997
1405	20.1495	12.6747	25.0244	11.0497	12.9997	12.0247
1406	20.1495	12.6747	25.0244	11.0497	12.9997	12.0247
1407	20.1495	12.6747	25.3494	11.3747	12.3497	12.0247
1408	20.1495	12.9997	25.0244	11.3747	12.3497	12.0247
1409	20.1495	12.6747	25.0244	11.6997	12.6747	11.6997
1410	20.1495	12.6747	25.0244	11.3747	12.9997	11.6997
1411	20.1495	12.9997	25.0244	11.3747	12.9997	12.0247
1412	19.8245	12.6747	25.0244	11.0497	12.6747	12.0247
1413	19.8245	12.6747	25.0244	11.0497	12.3497	12.0247
1414	20.1495	12.6747	25.0244	10.7247	12.3497	11.6997
1415	19.8245	12.0247	25.6744	11.3747	12.3497	11.3747
1416	20.1495	12.6747	25.0244	11.3747	12.3497	11.6997
1417	20.1495	12.6747	25.0244	11.3747	12.3497	12.3497
1418	20.1495	12.6747	25.0244	11.0497	12.6747	11.6997
1419	20.1495	12.6747	25.0244	11.0497	12.9997	11.6997
1420	19.8245	12.6747	25.0244	11.3747	12.3497	11.6997
1421	20.1495	12.3497	25.3494	11.3747	12.3497	11.6997
1422	20.1495	12.6747	25.3494	11.0497	12.3497	11.3747
1423	20.1495	12.6747	25.0244	11.3747	12.3497	11.6997
1424	20.1495	12.6747	25.3494	11.3747	12.3497	11.6997
1425	19.8245	12.6747	25.0244	11.3747	12.3497	11.6997
1426	19.8245	12.3497	25.0244	11.0497	12.3497	11.6997
1427	20.1495	12.6747	25.3494	11.3747	12.3497	11.6997
1428	20.1495	12.6747	25.3494	11.3747	12.3497	12.0247
1429	19.8245	12.6747	25.3494	10.7247	12.3497	12.0247
1430	20.1495	12.9997	25.3494	11.0497	12.3497	12.3497
1431	20.1495	12.3497	25.0244	11.0497	12.3497	12.0247
1432	20.1495	12.9997	25.0244	11.3747	12.6747	12.0247
1433	20.1495	12.6747	25.0244	11.0497	12.3497	11.6997
1434	20.1495	12.6747	25.0244	11.0497	12.3497	12.0247
1435	20.1495	12.6747	25.0244	11.3747	12.3497	12.0247
1436	20.1495	12.6747	25.0244	11.3747	12.3497	12.0247
1437	20.1495	12.9997	25.0244	11.0497	12.3497	11.6997
1438	19.8245	12.9997	25.3494	11.0497	12.3497	12.3497
1439	20.1495	12.6747	25.0244	11.0497	12.6747	12.0247
1440	20.1495	12.3497	25.3494	11.0497	12.3497	12.0247
1441	20.1495	12.6747	25.3494	11.3747	12.3497	11.6997
1442	20.1495	12.6747	25.0244	11.0497	12.3497	12.0247
1443	20.1495	12.3497	25.0244	11.3747	12.3497	12.0247
1444	19.8245	12.6747	25.3494	11.0497	12.3497	12.0247
1445	20.1495	12.6747	25.0244	11.3747	12.3497	11.6997
1446	20.1495	12.6747	25.0244	11.3747	12.3497	12.0247
1447	20.1495	12.3497	25.3494	11.3747	12.3497	12.0247
1448	20.1495	12.3497	25.0244	11.0497	12.0247	12.0247
1449	19.8245	12.6747	25.3494	11.0497	12.3497	12.0247
1450	20.4745	12.3497	25.0244	11.0497	12.3497	12.0247
1451	20.1495	12.9997	25.0244	11.3747	12.3497	12.0247
1452	20.4745	12.6747	25.0244	11.0497	12.3497	12.3497
1453	20.1495	12.6747	25.3494	11.0497	12.3497	11.6997
1454	20.1495	12.3497	25.3494	11.3747	12.3497	12.0247
1455	20.1495	12.3497	25.3494	11.0497	12.3497	12.0247
1456	20.1495	12.6747	25.3494	11.3747	12.3497	11.6997
1457	20.1495	12.3497	25.0244	11.0497	12.3497	11.3747
1458	20.1495	12.6747	25.0244	11.0497	12.3497	11.6997
1459	20.1495	12.3497	25.0244	11.3747	12.3497	11.6997
1460	20.1495	12.0247	25.3494	11.0497	12.3497	11.3747
1461	20.1495	12.6747	25.0244	11.0497	12.3497	11.6997
1462	20.1495	12.3497	25.3494	11.6997	12.3497	11.6997
1463	20.1495	12.3497	25.3494	11.0497	12.3497	11.6997
1464	20.1495	12.3497	25.6744	11.3747	12.3497	12.0247
1465	20.1495	12.0247	25.3494	11.0497	12.6747	11.6997
1466	20.1495	12.3497	25.0244	11.0497	12.3497	12.0247
1467	20.1495	12.6747	25.3494	11.3747	12.3497	11.6997
1468	20.1495	12.6747	25.6744	11.0497	12.6747	12.3497
1469	20.1495	12.6747	25.3494	11.0497	12.3497	12.0247
1470	20.1495	12.6747	25.0244	11.3747	12.6747	11.6997
1471	20.1495	12.6747	25.3494	11.3747	12.0247	12.0247
1472	20.4745	12.9997	25.0244	11.3747	12.3497	11.3747
1473	20.4745	12.3497	25.3494	11.0497	12.3497	11.6997
1474	20.1495	12.3497	25.0244	11.0497	12.6747	12.0247
1475	20.1495	12.3497	25.0244	11.3747	12.6747	11.6997
1476	20.4745	12.3497	25.3494	11.3747	12.3497	11.6997
1477	20.1495	12.3497	25.0244	11.3747	12.3497	11.3747
1478	20.4745	12.6747	25.3494	11.3747	12.3497	11.6997
1479	20.1495	12.3497	25.3494	11.0497	12.3497	11.6997
1480	20.1495	12.3497	25.3494	11.3747	12.3497	11.3747
1481	20.4745	12.6747	25.0244	11.3747	12.3497	11.6997
1482	19.8245	12.0247	25.3494	11.3747	12.3497	11.6997
1483	20.1495	12.6747	25.0244	11.3747	12.3497	11.3747
1484	20.1495	12.3497	25.0244	11.0497	12.3497	11.6997
1485	20.1495	12.6747	24.6994	11.3747	12.3497	11.6997
1486	20.1495	12.0247	25.0244	11.0497	12.3497	11.3747
1487	20.1495	12.3497	25.3494	11.0497	12.3497	11.6997
1488	20.1495	12.6747	25.3494	11.0497	12.3497	11.6997
1489	20.1495	12.6747	25.3494	11.3747	12.3497	12.0247
1490	20.1495	12.3497	25.3494	11.3747	12.3497	11.3747
1491	19.8245	12.3497	25.3494	11.0497	12.6747	11.6997
1492	20.1495	12.3497	25.3494	11.0497	12.6747	11.6997
1493	20.1495	12.6747	25.3494	11.3747	12.3497	12.0247
1494	20.1495	12.9997	25.0244	11.3747	12.3497	11.6997
1495	20.1495	12.3497	25.0244	11.0497	12.6747	11.6997
1496	20.1495	12.6747	25.3494	11.3747	12.3497	11.3747
1497	19.8245	12.6747	25.3494	11.0497	12.6747	12.0247
1498	20.1495	12.6747	25.3494	11.3747	12.3497	11.0497
1499	20.4745	12.3497	25.3494	11.3747	12.3497	11.3747
1500	20.1495	12.3497	25.3494	11.3747	12.9997	11.6997
1501	20.1495	12.6747	25.6744	11.0497	12.6747	11.0497
1502	20.1495	12.6747	25.3494	11.3747	12.3497	11.3747
1503	20.1495	12.3497	25.3494	11.3747	12.6747	11.3747
1504	20.1495	12.3497	25.3494	11.3747	12.6747	11.3747
1505	20.1495	12.6747	25.0244	12.0247	12.6747	11.6997
1506	20.1495	12.6747	25.0244	11.3747	12.6747	12.0247
1507	20.1495	12.3497	25.3494	11.0497	12.9997	11.3747
1508	20.1495	12.0247	25.0244	11.6997	12.6747	11.6997
1509	20.1495	12.3497	25.3494	11.3747	12.6747	11.6997
1510	20.1495	12.6747	25.3494	11.3747	12.6747	11.3747
1511	20.1495	12.0247	25.0244	11.3747	12.6747	11.6997
1512	20.1495	12.3497	25.3494	11.6997	12.6747	11.6997
1513	20.1495	12.3497	25.0244	11.3747	12.9997	11.6997
1514	20.1495	12.6747	25.3494	11.3747	12.9997	11.6997
1515	19.8245	12.3497	25.3494	11.3747	12.6747	11.6997
1516	20.1495	11.6997	25.3494	11.3747	12.9997	11.6997
1517	20.1495	12.3497	25.0244	11.3747	12.6747	11.6997
1518	20.1495	12.3497	25.3494	11.3747	12.6747	11.6997
1519	20.1495	12.3497	25.3494	11.3747	12.6747	11.3747
1520	20.1495	12.3497	25.3494	11.6997	12.9997	11.6997
1521	20.1495	12.3497	25.3494	11.3747	12.9997	11.6997
1522	20.1495	12.6747	25.0244	11.6997	12.6747	11.6997
1523	19.8245	12.3497	25.3494	11.3747	12.6747	11.3747
1524	20.1495	12.3497	25.3494	11.3747	12.9997	11.6997
1525	20.1495	12.0247	25.0244	11.0497	12.9997	11.3747
1526	20.1495	12.3497	25.3494	11.3747	12.9997	12.0247
1527	20.1495	12.3497	25.3494	11.3747	12.9997	11.6997
1528	20.1495	12.3497	25.3494	11.0497	12.6747	12.3497
1529	20.1495	12.3497	25.3494	11.3747	12.6747	11.3747
1530	20.1495	12.3497	25.3494	11.3747	12.6747	12.0247
1531	20.1495	12.3497	25.3494	11.0497	12.6747	11.6997
1532	20.1495	12.3497	25.0244	11.3747	12.6747	11.6997
1533	20.1495	12.3497	25.0244	11.3747	12.6747	11.6997
1534	20.1495	12.3497	25.3494	11.3747	12.6747	11.3747
1535	20.1495	12.3497	25.3494	11.3747	12.9997	11.6997
1536	20.1495	12.3497	25.3494	11.3747	12.6747	12.0247
1537	20.1495	12.3497	25.0244	11.0497	12.6747	11.3747
1538	20.1495	12.6747	25.3494	11.3747	12.6747	11.3747
1539	20.1495	12.6747	25.3494	11.6997	12.3497	11.3747
1540	20.1495	12.6747	25.3494	11.3747	12.6747	11.3747
1541	20.1495	12.6747	25.3494	11.0497	12.6747	11.3747
1542	20.1495	12.6747	25.3494	11.3747	12.3497	11.3747
1543	20.1495	12.6747	25.3494	11.0497	12.6747	12.0247
1544	20.1495	12.3497	25.3494	11.3747	12.6747	11.3747
1545	20.1495	12.6747	25.3494	11.0497	12.6747	11.3747
1546	20.1495	12.6747	25.3494	11.0497	12.6747	11.3747
1547	20.1495	12.6747	25.3494	11.3747	12.6747	12.0247
1548	20.1495	12.6747	25.3494	11.6997	12.6747	11.6997
1549	20.1495	12.6747	25.3494	11.3747	12.6747	11.6997
1550	20.1495	12.6747	25.3494	11.3747	12.6747	12.3497
1551	20.1495	12.9997	25.0244	11.3747	12.6747	11.6997
1552	20.1495	12.6747	25.0244	11.3747	12.6747	11.3747
1553	20.1495	12.6747	25.3494	11.3747	12.3497	11.6997
1554	19.8245	12.6747	25.3494	11.6997	12.3497	11.3747
1555	20.1495	12.6747	25.3494	11.3747	12.3497	11.6997
1556	20.1495	12.3497	25.3494	11.6997	12.3497	11.6997
1557	19.8245	12.6747	25.3494	11.3747	12.3497	11.6997
1558	20.1495	12.6747	25.3494	11.3747	12.3497	11.6997
1559	20.1495	12.9997	25.3494	11.6997	12.3497	11.6997
1560	20.1495	12.9997	25.3494	11.3747	12.0247	11.3747
1561	20.1495	13.3247	25.3494	11.6997	12.3497	12.0247
1562	20.1495	12.9997	25.3494	11.0497	12.0247	11.6997
1563	20.1495	12.9997	25.0244	11.3747	12.3497	11.6997
1564	20.1495	12.9997	25.3494	11.0497	12.3497	12.0247
1565	20.1495	12.9997	25.0244	11.0497	12.3497	11.6997
1566	20.1495	12.9997	25.3494	11.3747	12.3497	11.6997
1567	20.1495	12.9997	25.3494	11.3747	12.0247	11.6997
1568	20.1495	12.9997	25.3494	11.3747	12.0247	11.6997
1569	20.1495	12.9997	25.6744	11.0497	12.0247	11.3747
1570	20.1495	12.9997	25.3494	11.3747	12.0247	11.6997
1571	20.1495	12.9997	25.3494	11.3747	12.0247	12.0247
1572	20.1495	12.9997	25.3494	11.3747	12.0247	11.6997
1573	20.1495	12.9997	25.3494	11.3747	12.0247	11.6997
1574	20.1495	12.6747	25.3494	11.3747	12.0247	12.0247
1575	20.1495	12.9997	25.3494	11.0497	12.0247	11.6997
1576	20.1495	12.6747	25.6744	11.0497	12.0247	11.6997
1577	20.1495	13.3247	25.6744	11.0497	12.0247	11.6997
1578	20.1495	12.6747	25.3494	11.0497	12.0247	11.6997
1579	19.8245	12.9997	25.6744	11.3747	12.0247	11.6997
1580	20.1495	12.6747	25.3494	11.0497	12.0247	12.0247
1581	20.1495	12.6747	25.6744	11.3747	11.6997	12.0247
1582	20.1495	12.6747	25.3494	11.3747	12.0247	11.6997
1583	20.1495	12.9997	25.3494	11.3747	11.6997	11.3747
1584	20.1495	13.3247	25.3494	11.6997	12.0247	11.3747
1585	20.1495	12.9997	25.6744	11.3747	11.6997	12.3497
1586	20.1495	12.6747	25.3494	11.3747	11.6997	12.0247
1587	20.1495	12.6747	25.3494	11.0497	12.0247	11.6997
1588	20.1495	12.9997	25.6744	11.3747	11.6997	12.0247
1589	19.1745	12.9997	25.3494	11.3747	11.6997	12.0247
1590	19.4995	13.3247	25.3494	11.3747	11.6997	12.0247
1591	20.1495	12.6747	25.3494	11.3747	12.0247	11.6997
1592	19.1745	12.3497	25.3494	11.3747	11.3747	11.6997
1593	19.8245	13.3247	25.3494	11.0497	11.3747	12.3497
1594	19.8245	12.9997	25.3494	11.0497	11.3747	11.6997
1595	20.1495	12.6747	25.3494	11.0497	11.3747	12.0247
1596	19.8245	12.6747	25.6744	11.0497	11.3747	11.6997
1597	20.1495	12.6747	25.3494	11.0497	12.0247	12.0247
1598	20.4745	12.6747	25.3494	11.3747	11.6997	12.0247
1599	20.4745	12.9997	25.3494	11.3747	12.0247	11.6997
1600	20.1495	12.6747	25.3494	11.0497	11.6997	11.6997
1601	20.4745	12.9997	25.3494	11.0497	11.6997	12.0247
1602	20.1495	12.9997	25.3494	11.0497	11.6997	11.6997
1603	20.1495	12.9997	25.3494	11.0497	11.6997	12.0247
1604	20.1495	13.3247	25.3494	10.7247	12.0247	11.6997
1605	20.4745	12.6747	25.3494	11.3747	11.6997	12.0247
1606	20.1495	12.6747	25.3494	11.6997	12.0247	12.0247
1607	20.4745	12.6747	25.3494	11.6997	12.0247	12.0247
1608	20.4745	12.9997	25.3494	11.6997	12.0247	11.6997
1609	19.8245	12.9997	25.3494	11.3747	12.3497	12.0247
1610	19.8245	12.6747	25.6744	11.6997	12.0247	12.0247
1611	20.1495	12.9997	25.0244	11.6997	12.3497	12.0247
1612	19.8245	13.6497	25.3494	11.3747	12.0247	12.0247
1613	20.1495	13.3247	25.3494	11.3747	12.0247	12.0247
1614	19.8245	12.9997	25.3494	11.6997	12.3497	12.3497
1615	19.8245	12.9997	25.3494	11.3747	12.3497	12.0247
1616	20.1495	12.9997	25.3494	11.3747	12.3497	11.6997
1617	19.8245	13.3247	25.6744	11.3747	12.3497	12.0247
1618	20.1495	12.9997	25.3494	11.3747	12.3497	12.0247
1619	20.1495	13.6497	25.3494	11.3747	12.6747	12.0247
1620	20.1495	13.3247	25.3494	11.3747	12.6747	12.0247
1621	19.8245	13.3247	25.3494	11.3747	12.6747	12.0247
1622	19.8245	13.3247	25.3494	11.3747	12.6747	11.6997
1623	20.4745	12.6747	25.6744	11.3747	12.3497	11.6997
1624	19.8245	13.3247	25.6744	11.3747	12.6747	12.3497
1625	20.1495	13.3247	25.3494	11.0497	12.6747	11.6997
1626	19.8245	12.9997	25.6744	11.6997	12.3497	12.3497
1627	20.4745	12.9997	25.3494	11.3747	12.6747	12.9997
1628	19.8245	13.3247	25.0244	11.6997	12.3497	12.0247
1629	20.1495	12.6747	25.3494	11.6997	12.6747	12.0247
1630	20.4745	13.3247	25.3494	11.3747	12.3497	11.3747
1631	20.4745	12.9997	25.3494	11.3747	12.6747	12.3497
1632	20.1495	13.3247	25.3494	11.6997	12.6747	11.6997
1633	19.8245	12.9997	25.3494	11.3747	12.6747	11.6997
1634	20.4745	12.9997	25.3494	11.3747	12.6747	11.0497
1635	20.1495	12.6747	25.6744	11.6997	12.6747	11.6997
1636	20.1495	12.9997	25.3494	11.6997	12.6747	12.0247
1637	20.4745	12.9997	25.3494	11.6997	12.6747	12.0247
1638	20.4745	12.9997	25.3494	12.0247	12.3497	11.6997
1639	20.1495	12.9997	25.3494	11.3747	12.3497	12.3497
1640	20.1495	12.9997	25.3494	12.0247	12.3497	11.6997
1641	19.8245	12.3497	25.3494	11.6997	12.6747	12.3497
1642	20.1495	12.6747	25.6744	11.3747	12.6747	11.6997
1643	20.1495	12.6747	25.6744	11.3747	12.6747	12.3497
1644	20.1495	12.9997	25.3494	11.6997	12.6747	12.3497
1645	20.1495	12.6747	25.6744	11.3747	12.3497	11.6997
1646	19.8245	12.6747	25.6744	11.0497	12.3497	12.0247
1647	20.1495	12.9997	25.3494	11.6997	12.3497	11.3747
1648	20.4745	12.9997	25.3494	11.3747	12.3497	11.3747
1649	19.8245	12.6747	25.6744	11.6997	12.3497	12.3497
1650	20.1495	12.6747	25.6744	11.3747	12.3497	11.6997
1651	20.1495	12.6747	25.3494	11.3747	12.3497	12.3497
1652	19.8245	13.3247	25.6744	11.3747	12.6747	12.3497
1653	20.4745	12.6747	25.6744	11.3747	12.3497	12.3497
1654	20.1495	12.9997	25.6744	11.3747	12.6747	12.3497
1655	19.8245	12.9997	25.3494	11.6997	12.6747	12.0247
1656	19.8245	12.6747	25.6744	11.3747	12.6747	11.6997
1657	19.8245	12.9997	25.3494	11.0497	12.3497	11.6997
1658	20.1495	12.3497	25.0244	11.0497	12.3497	11.6997
1659	19.8245	12.6747	25.3494	11.0497	12.3497	12.0247
1660	19.8245	12.9997	25.3494	11.3747	12.6747	12.3497
1661	20.1495	12.9997	25.3494	11.0497	12.6747	12.6747
1662	19.8245	12.9997	25.3494	11.3747	12.6747	12.0247
1663	19.8245	12.9997	25.3494	11.3747	12.3497	11.6997
1664	20.1495	13.3247	25.6744	11.0497	12.6747	12.0247
1665	19.8245	12.9997	25.6744	11.0497	12.6747	11.6997
1666	20.1495	12.9997	25.3494	11.3747	12.6747	12.0247
1667	20.1495	12.6747	25.3494	11.0497	12.6747	11.6997
1668	19.8245	12.9997	25.3494	11.0497	12.6747	12.0247
1669	20.1495	12.9997	25.3494	11.0497	12.6747	12.0247
1670	20.1495	12.9997	25.3494	11.3747	12.6747	12.3497
1671	20.1495	13.3247	25.3494	11.0497	12.6747	12.6747
1672	20.1495	12.9997	25.3494	11.3747	12.3497	11.6997
1673	19.8245	12.9997	25.3494	11.3747	12.9997	12.0247
1674	19.8245	13.6497	25.3494	11.3747	12.6747	12.0247
1675	19.8245	12.6747	25.3494	11.0497	12.6747	11.6997
1676	19.8245	12.6747	25.6744	11.3747	12.6747	12.0247
1677	19.8245	12.9997	25.3494	11.6997	12.9997	11.6997
1678	19.8245	12.9997	25.3494	11.0497	12.9997	12.0247
1679	19.8245	12.9997	25.3494	11.3747	12.3497	12.0247
1680	20.1495	12.9997	25.3494	11.0497	12.3497	11.6997
1681	20.1495	12.9997	25.3494	11.0497	12.6747	12.0247
1682	20.1495	13.3247	25.3494	11.0497	12.6747	12.0247
1683	19.8245	13.3247	25.9994	11.3747	12.6747	11.6997
1684	20.1495	13.6497	25.6744	11.3747	12.6747	12.0247
1685	20.1495	13.3247	25.3494	11.3747	12.3497	11.6997
1686	20.1495	13.3247	25.3494	11.3747	12.6747	11.6997
1687	20.1495	13.3247	25.3494	11.3747	12.6747	12.0247
1688	20.4745	13.3247	25.3494	11.3747	12.6747	11.6997
1689	20.1495	12.9997	25.3494	11.3747	12.3497	11.6997
1690	20.1495	13.3247	25.3494	11.3747	12.6747	12.0247
1691	20.1495	12.6747	25.3494	11.0497	12.3497	11.6997
1692	20.1495	12.9997	25.3494	10.7247	12.6747	11.6997
1693	20.1495	12.6747	25.3494	11.0497	12.3497	12.0247
1694	20.1495	12.9997	25.3494	11.3747	12.6747	12.3497
1695	20.1495	12.9997	25.3494	11.3747	12.6747	11.6997
1696	20.1495	12.9997	25.3494	11.3747	12.3497	11.6997
1697	20.1495	13.3247	25.3494	11.3747	12.3497	12.0247
1698	20.1495	12.9997	25.3494	11.3747	12.6747	12.3497
1699	20.1495	13.3247	25.3494	11.0497	12.3497	11.6997
1700	20.1495	13.6497	25.3494	11.3747	12.3497	12.3497
1701	20.1495	12.6747	25.3494	11.3747	12.3497	12.0247
1702	20.1495	13.3247	25.3494	11.3747	12.6747	11.6997
1703	20.1495	12.9997	25.3494	11.3747	12.3497	12.0247
1704	19.8245	13.3247	25.3494	11.6997	12.6747	11.6997
1705	20.1495	13.3247	25.3494	11.3747	12.3497	12.0247
1706	20.1495	13.3247	25.3494	11.3747	12.3497	11.3747
1707	20.1495	13.3247	25.3494	11.6997	12.3497	12.0247
1708	20.1495	13.3247	25.3494	11.3747	12.3497	11.6997
1709	20.1495	13.6497	25.3494	11.3747	12.3497	12.0247
1710	20.4745	13.6497	25.6744	11.6997	12.3497	12.0247
1711	20.1495	12.9997	25.3494	11.6997	12.3497	12.0247
1712	20.1495	12.6747	25.3494	11.0497	12.3497	11.6997
1713	20.1495	13.6497	25.3494	11.3747	12.6747	12.0247
1714	20.1495	13.3247	25.3494	11.6997	12.3497	12.0247
1715	19.8245	12.9997	25.6744	11.3747	12.3497	12.3497
1716	20.1495	13.6497	25.3494	11.3747	12.6747	12.0247
1717	20.1495	12.9997	25.3494	11.3747	12.6747	12.0247
1718	20.1495	12.9997	25.3494	11.3747	12.6747	12.0247
1719	20.1495	12.9997	25.3494	11.0497	12.3497	12.3497
1720	20.1495	12.9997	25.3494	11.3747	12.6747	12.3497
1721	20.1495	12.9997	25.3494	10.7247	12.3497	12.3497
1722	20.1495	13.3247	25.6744	11.3747	12.6747	12.0247
1723	20.1495	12.9997	25.3494	11.0497	12.6747	12.0247
1724	20.4745	13.3247	25.6744	11.3747	12.3497	12.3497
1725	20.1495	13.6497	25.3494	11.3747	12.0247	12.0247
1726	20.4745	13.3247	25.6744	11.3747	12.6747	12.0247
1727	20.1495	13.3247	25.3494	11.3747	12.3497	12.0247
1728	20.1495	13.3247	25.3494	11.0497	12.3497	12.0247
1729	19.8245	13.3247	25.3494	11.3747	12.0247	12.3497
1730	20.1495	13.6497	25.3494	11.6997	12.3497	12.3497
1731	20.1495	13.6497	25.3494	11.0497	12.3497	12.3497
1732	20.1495	13.3247	25.6744	11.0497	12.6747	12.0247
1733	20.1495	13.6497	25.3494	11.0497	12.6747	12.0247
1734	20.4745	13.6497	25.3494	11.3747	12.3497	12.0247
1735	20.1495	13.6497	25.3494	11.0497	12.3497	12.0247
1736	20.1495	13.6497	25.3494	11.0497	12.6747	12.3497
1737	20.1495	13.6497	25.6744	11.3747	12.0247	12.0247
1738	20.4745	13.6497	25.3494	11.3747	12.3497	12.3497
1739	20.4745	13.3247	25.3494	11.0497	12.3497	12.0247
1740	20.4745	13.9747	25.3494	11.0497	12.3497	12.3497
1741	20.4745	13.6497	25.3494	11.0497	12.6747	11.6997
1742	20.1495	13.9747	25.3494	11.0497	12.6747	12.3497
1743	20.1495	13.6497	25.6744	11.3747	12.3497	12.3497
1744	20.1495	13.3247	25.3494	11.0497	12.6747	12.6747
1745	20.7995	13.3247	25.3494	11.0497	12.9997	12.3497
1746	20.4745	13.9747	25.3494	11.0497	12.6747	11.6997
1747	20.1495	13.3247	25.3494	11.0497	12.9997	12.3497
1748	20.1495	13.6497	25.3494	11.0497	12.6747	12.0247
1749	20.1495	13.3247	25.3494	11.0497	12.6747	12.0247
1750	20.1495	13.6497	25.3494	11.0497	12.6747	12.0247
1751	20.1495	13.9747	25.6744	11.3747	12.6747	12.0247
1752	20.1495	13.3247	25.3494	11.0497	12.9997	12.0247
1753	20.1495	12.9997	25.3494	11.0497	12.6747	12.3497
1754	20.1495	13.3247	25.3494	11.0497	12.9997	12.0247
1755	19.1745	12.9997	25.3494	11.6997	12.6747	12.3497
1756	19.8245	13.3247	25.3494	11.3747	12.6747	11.6997
1757	19.8245	13.3247	25.3494	11.6997	12.6747	12.3497
1758	19.8245	12.6747	25.3494	11.0497	12.6747	12.3497
1759	19.8245	13.3247	25.3494	11.3747	12.6747	12.0247
1760	19.8245	13.3247	25.3494	11.3747	12.6747	12.3497
1761	19.8245	13.3247	25.3494	11.3747	12.6747	11.6997
1762	19.8245	12.9997	25.3494	11.3747	12.6747	12.0247
1763	20.1495	12.9997	25.6744	11.3747	12.6747	12.0247
1764	19.8245	12.9997	25.3494	11.0497	12.6747	12.3497
1765	20.1495	12.9997	25.3494	11.3747	12.6747	12.0247
1766	19.8245	12.9997	25.6744	11.0497	12.6747	11.6997
1767	19.8245	12.9997	25.3494	11.3747	12.6747	12.3497
1768	19.8245	13.6497	25.6744	11.3747	12.6747	12.3497
1769	20.1495	12.6747	25.3494	11.0497	12.9997	11.6997
1770	19.8245	13.6497	25.3494	11.3747	12.9997	12.0247
1771	19.8245	12.9997	25.3494	11.3747	12.9997	12.3497
1772	19.8245	12.6747	25.3494	11.3747	12.9997	11.6997
1773	19.8245	12.9997	25.3494	11.3747	12.9997	12.0247
1774	20.1495	12.6747	25.3494	11.0497	12.9997	12.0247
1775	19.8245	13.6497	25.6744	11.0497	12.9997	12.0247
1776	20.1495	13.3247	25.6744	11.3747	12.9997	11.3747
1777	19.8245	12.6747	25.3494	11.3747	12.9997	12.3497
1778	19.8245	12.6747	25.3494	11.3747	12.9997	12.0247
1779	19.8245	13.3247	25.3494	11.0497	12.9997	11.6997
1780	19.8245	13.6497	25.3494	11.0497	12.9997	12.3497
1781	19.8245	13.3247	25.3494	11.0497	12.6747	11.6997
1782	19.8245	13.6497	25.6744	11.0497	12.6747	11.6997
1783	19.8245	13.6497	25.3494	11.0497	12.9997	12.0247
1784	19.4995	13.3247	25.3494	11.3747	12.6747	12.0247
1785	19.8245	13.6497	25.3494	11.0497	12.9997	12.0247
1786	19.8245	13.3247	25.6744	11.0497	12.9997	11.3747
1787	19.4995	12.9997	25.6744	11.3747	12.9997	11.3747
1788	19.8245	13.6497	25.6744	11.3747	12.9997	11.6997
1789	19.4995	13.6497	25.3494	11.0497	12.9997	11.3747
1790	19.8245	13.3247	25.3494	11.0497	12.9997	12.0247
1791	19.8245	12.9997	25.3494	11.0497	12.9997	12.0247
1792	19.4995	13.3247	25.3494	11.0497	12.9997	11.6997
1793	19.4995	13.3247	25.3494	11.0497	12.9997	12.0247
1794	19.4995	13.6497	25.3494	11.3747	12.9997	11.6997
1795	19.8245	13.3247	25.6744	11.3747	12.9997	11.6997
1796	19.8245	13.6497	25.6744	11.3747	12.6747	12.0247
1797	19.4995	13.3247	25.3494	11.0497	12.9997	11.6997
1798	19.8245	13.3247	25.3494	11.0497	12.6747	12.0247
1799	19.8245	12.9997	25.3494	11.3747	12.6747	11.6997

## Sheet: 10Hz
Stimulation
Time (s)	BGBV-200	BGBV-205	BGBV-206	BGBV-209	BGBV-210
0	16.2496	20.7995	13.6497	12.3497	16.8996
1	16.5746	20.4745	13.6497	12.3497	17.2246
2	16.2496	20.4745	13.6497	12.3497	16.8996
3	16.2496	20.7995	13.6497	12.3497	17.2246
4	16.5746	20.4745	13.6497	11.6997	17.2246
5	16.2496	20.4745	13.3247	12.0247	16.8996
6	16.2496	20.4745	13.3247	12.0247	17.2246
7	16.2496	20.4745	13.3247	12.0247	17.2246
8	16.2496	20.4745	13.6497	12.0247	17.2246
9	16.2496	20.7995	13.3247	11.6997	16.8996
10	16.2496	20.7995	13.3247	12.3497	16.8996
11	16.2496	21.1245	13.3247	12.0247	16.8996
12	16.2496	20.7995	13.3247	12.3497	16.5746
13	16.5746	20.7995	13.3247	12.3497	17.2246
14	16.5746	20.4745	13.6497	12.0247	17.2246
15	16.2496	20.1495	13.6497	12.0247	16.8996
16	16.5746	20.4745	13.3247	12.3497	16.8996
17	16.2496	20.7995	13.3247	12.6747	16.8996
18	16.2496	21.1245	13.6497	12.3497	16.5746
19	16.2496	20.4745	13.9747	12.6747	16.8996
20	16.2496	20.4745	13.9747	12.3497	16.8996
21	16.5746	20.7995	13.6497	12.0247	16.8996
22	15.9246	20.7995	13.6497	12.3497	16.8996
23	16.2496	20.7995	13.3247	12.0247	17.2246
24	16.2496	20.7995	13.6497	12.0247	16.8996
25	16.5746	20.1495	13.3247	12.0247	16.8996
26	16.2496	20.7995	13.3247	12.3497	17.2246
27	16.2496	20.7995	13.3247	12.3497	16.8996
28	16.5746	20.7995	13.3247	12.3497	16.8996
29	16.2496	20.7995	13.6497	12.3497	17.2246
30	16.2496	20.7995	13.6497	12.3497	16.8996
31	16.2496	21.1245	13.6497	12.3497	16.8996
32	16.2496	20.7995	13.3247	12.3497	16.5746
33	16.2496	20.7995	13.3247	12.3497	16.8996
34	16.2496	20.7995	13.3247	12.6747	16.5746
35	16.5746	20.4745	13.6497	12.3497	16.8996
36	16.2496	20.4745	13.3247	12.3497	16.2496
37	16.2496	20.4745	13.3247	12.3497	16.8996
38	16.2496	20.4745	13.3247	12.3497	16.5746
39	15.9246	20.4745	13.6497	12.3497	16.8996
40	16.2496	20.4745	12.9997	12.3497	17.2246
41	16.2496	20.4745	13.3247	12.6747	16.2496
42	16.5746	20.4745	13.3247	12.3497	16.5746
43	15.9246	20.4745	13.3247	12.3497	16.8996
44	15.9246	20.7995	13.3247	12.3497	16.5746
45	16.5746	20.7995	13.3247	12.6747	16.5746
46	16.2496	20.4745	13.3247	12.0247	16.8996
47	16.2496	20.4745	13.3247	12.3497	16.5746
48	16.5746	20.7995	13.3247	12.6747	16.5746
49	16.2496	20.7995	13.3247	12.3497	16.5746
50	16.2496	20.4745	13.6497	12.6747	16.8996
51	16.5746	20.7995	13.3247	12.6747	16.5746
52	16.2496	20.7995	13.6497	12.3497	16.8996
53	16.2496	20.7995	13.9747	12.3497	16.5746
54	16.5746	20.7995	13.6497	12.3497	16.2496
55	16.2496	20.4745	13.9747	12.3497	16.2496
56	16.5746	20.7995	13.9747	12.3497	16.5746
57	16.5746	20.4745	13.9747	12.9997	16.5746
58	16.5746	20.7995	13.6497	12.6747	16.5746
59	16.5746	20.7995	13.6497	12.6747	16.5746
60	16.5746	20.7995	13.6497	12.3497	16.5746
61	16.5746	20.7995	12.9997	12.3497	16.2496
62	16.5746	21.1245	13.3247	12.3497	16.5746
63	16.2496	20.7995	13.6497	12.3497	16.2496
64	16.5746	21.1245	13.3247	12.3497	16.2496
65	16.5746	20.4745	13.3247	12.3497	16.2496
66	16.5746	20.7995	13.6497	12.3497	16.5746
67	16.5746	21.1245	13.3247	12.3497	16.2496
68	16.5746	20.4745	13.3247	12.6747	16.2496
69	16.2496	20.7995	13.3247	11.6997	16.5746
70	16.5746	20.7995	13.3247	12.0247	16.2496
71	16.5746	20.7995	13.3247	12.3497	16.2496
72	16.5746	20.7995	13.6497	12.3497	16.2496
73	16.5746	20.7995	13.3247	12.3497	15.9246
74	16.8996	20.7995	13.3247	12.3497	15.9246
75	16.5746	20.7995	13.3247	12.6747	15.9246
76	16.5746	21.1245	13.6497	12.3497	15.5996
77	16.2496	20.7995	13.6497	12.6747	15.9246
78	16.2496	20.4745	13.6497	12.3497	15.9246
79	16.2496	20.7995	13.3247	12.3497	16.2496
80	16.2496	20.7995	13.6497	12.6747	16.2496
81	16.8996	20.7995	13.6497	12.3497	15.9246
82	17.2246	20.4745	13.3247	12.3497	16.5746
83	17.8746	20.4745	13.6497	12.6747	15.9246
84	17.8746	20.7995	13.6497	12.6747	16.5746
85	17.2246	20.4745	13.6497	12.3497	15.9246
86	17.2246	20.4745	13.6497	12.3497	16.2496
87	16.8996	20.4745	13.6497	12.6747	16.2496
88	17.5496	20.1495	13.6497	12.6747	16.2496
89	17.2246	20.7995	13.6497	12.6747	16.2496
90	17.5496	20.4745	13.3247	12.3497	16.2496
91	17.2246	20.4745	13.3247	12.6747	16.2496
92	17.2246	20.4745	13.6497	12.3497	15.9246
93	17.5496	20.7995	13.3247	12.6747	15.9246
94	17.5496	20.4745	13.6497	12.3497	16.2496
95	17.2246	20.1495	13.3247	12.6747	16.2496
96	17.5496	20.1495	13.6497	12.6747	16.5746
97	17.2246	20.1495	13.3247	12.6747	16.2496
98	16.8996	19.8245	13.3247	12.6747	16.2496
99	16.8996	20.1495	13.6497	12.3497	16.5746
100	16.8996	20.7995	13.3247	12.3497	15.9246
101	16.2496	20.4745	13.3247	12.3497	16.5746
102	16.5746	20.1495	13.6497	12.6747	16.5746
103	16.5746	20.1495	13.6497	12.6747	16.5746
104	16.5746	20.1495	13.6497	12.6747	16.2496
105	16.5746	19.8245	13.3247	12.6747	15.9246
106	17.2246	20.1495	13.6497	12.6747	16.5746
107	16.8996	20.1495	13.3247	12.3497	15.9246
108	16.8996	20.1495	13.6497	12.3497	15.9246
109	16.5746	20.1495	13.3247	12.3497	15.9246
110	16.5746	19.8245	13.3247	12.3497	15.9246
111	16.5746	19.8245	13.3247	12.3497	16.2496
112	16.8996	19.8245	12.9997	12.3497	16.2496
113	17.2246	20.1495	13.6497	12.3497	16.2496
114	16.5746	20.1495	13.3247	12.3497	15.9246
115	16.8996	19.8245	13.3247	12.3497	15.9246
116	16.8996	19.8245	13.3247	12.3497	15.9246
117	17.5496	20.1495	13.3247	12.3497	16.2496
118	16.2496	19.8245	13.6497	12.3497	15.9246
119	16.8996	19.8245	12.9997	12.3497	15.5996
120	17.5496	19.8245	13.3247	12.3497	16.2496
121	17.2246	19.8245	12.9997	12.3497	15.5996
122	17.2246	19.8245	13.3247	12.3497	15.5996
123	17.2246	19.8245	13.3247	12.3497	15.9246
124	17.5496	19.8245	13.3247	12.3497	15.9246
125	17.5496	19.4995	13.3247	12.0247	15.9246
126	17.8746	20.1495	13.6497	12.3497	16.2496
127	17.8746	19.4995	13.3247	12.0247	15.9246
128	17.8746	19.4995	12.9997	12.3497	15.9246
129	17.8746	19.8245	12.9997	11.6997	15.9246
130	17.5496	19.4995	13.3247	12.0247	16.5746
131	17.8746	19.4995	13.6497	12.0247	16.2496
132	17.5496	19.4995	13.3247	11.6997	16.5746
133	17.5496	19.4995	13.3247	11.6997	15.9246
134	17.2246	19.4995	13.3247	11.6997	16.2496
135	16.8996	19.4995	13.3247	12.0247	15.9246
136	17.2246	19.8245	12.9997	12.0247	16.2496
137	16.5746	19.4995	13.3247	12.0247	16.2496
138	16.5746	19.8245	12.9997	11.6997	16.5746
139	16.5746	19.4995	13.3247	12.0247	15.9246
140	16.5746	19.1745	12.9997	11.6997	16.2496
141	16.5746	19.1745	13.3247	11.6997	16.2496
142	16.2496	19.8245	13.3247	12.3497	15.5996
143	16.5746	19.4995	12.9997	11.6997	16.5746
144	16.8996	19.4995	12.9997	11.6997	16.2496
145	16.5746	19.4995	13.3247	12.0247	16.2496
146	16.5746	19.8245	13.3247	11.6997	15.9246
147	16.5746	19.4995	12.9997	11.3747	16.2496
148	16.8996	19.4995	13.3247	11.6997	16.2496
149	16.8996	19.1745	12.9997	11.6997	16.2496
150	16.8996	19.4995	12.9997	11.3747	16.2496
151	16.5746	19.8245	12.9997	11.6997	16.5746
152	16.5746	19.1745	12.9997	11.3747	16.5746
153	16.5746	19.1745	12.9997	12.0247	16.2496
154	16.5746	19.1745	12.9997	11.6997	16.2496
155	16.8996	19.4995	12.9997	12.0247	16.2496
156	16.8996	19.4995	12.6747	12.0247	16.5746
157	16.8996	18.8495	12.9997	12.0247	16.2496
158	16.8996	19.1745	13.3247	12.0247	16.5746
159	17.2246	19.4995	12.9997	12.0247	16.5746
160	16.8996	19.1745	12.9997	12.0247	16.2496
161	17.2246	19.1745	13.3247	12.0247	16.2496
162	17.2246	19.4995	12.9997	12.0247	16.2496
163	17.5496	19.1745	13.3247	12.0247	16.2496
164	16.8996	19.1745	12.9997	12.0247	16.2496
165	17.5496	19.4995	13.3247	12.0247	16.5746
166	17.2246	18.8495	12.9997	11.6997	16.2496
167	17.2246	19.1745	12.9997	11.6997	15.9246
168	17.5496	19.4995	12.6747	11.6997	15.9246
169	17.5496	19.1745	12.9997	11.6997	16.5746
170	17.2246	19.4995	12.9997	11.3747	16.2496
171	17.5496	18.8495	12.6747	11.6997	15.9246
172	17.8746	18.8495	12.6747	11.6997	15.9246
173	17.5496	19.1745	12.6747	11.3747	15.9246
174	17.5496	18.8495	12.9997	11.3747	16.5746
175	17.5496	19.1745	12.6747	11.6997	15.9246
176	17.2246	18.8495	12.6747	11.6997	16.2496
177	17.5496	19.4995	12.6747	11.3747	15.9246
178	17.5496	19.1745	12.6747	11.3747	15.9246
179	17.5496	18.5245	12.6747	11.0497	15.9246
180	17.5496	18.8495	12.9997	11.3747	15.9246
181	17.5496	18.8495	12.9997	11.3747	16.2496
182	17.2246	19.1745	12.6747	11.3747	16.2496
183	16.5746	18.8495	12.9997	11.6997	16.2496
184	17.5496	18.8495	12.9997	12.0247	15.9246
185	17.2246	18.8495	12.6747	11.6997	15.9246
186	16.8996	18.8495	12.9997	11.6997	16.5746
187	17.2246	18.8495	12.9997	11.3747	16.2496
188	17.5496	19.4995	12.9997	11.3747	16.5746
189	16.5746	19.1745	12.9997	11.3747	15.9246
190	16.8996	18.8495	12.9997	11.3747	16.2496
191	17.2246	18.8495	13.3247	11.6997	16.2496
192	17.2246	19.1745	13.3247	11.3747	16.2496
193	16.8996	19.1745	12.9997	12.0247	15.9246
194	17.5496	18.8495	12.6747	11.3747	15.5996
195	16.8996	18.8495	12.6747	11.3747	16.2496
196	16.8996	19.1745	12.9997	12.0247	16.2496
197	17.2246	18.8495	12.9997	11.3747	15.5996
198	17.2246	19.1745	12.6747	11.6997	15.9246
199	17.2246	18.8495	12.9997	11.6997	15.9246
200	17.5496	18.8495	12.9997	12.0247	16.2496
201	17.2246	19.1745	12.6747	12.0247	16.2496
202	16.8996	19.1745	12.6747	11.6997	16.2496
203	16.8996	19.1745	12.9997	12.0247	15.9246
204	16.8996	18.8495	12.6747	11.6997	15.9246
205	16.8996	19.1745	12.6747	12.0247	16.2496
206	16.5746	19.1745	12.6747	11.6997	15.9246
207	16.5746	19.1745	12.3497	11.6997	15.9246
208	16.5746	19.1745	12.6747	12.0247	15.5996
209	16.5746	19.4995	12.6747	12.0247	15.5996
210	16.5746	19.1745	12.3497	11.6997	15.5996
211	16.2496	18.8495	12.0247	11.3747	15.5996
212	16.5746	18.8495	12.6747	11.3747	15.5996
213	16.8996	18.8495	12.3497	12.0247	15.5996
214	17.2246	18.8495	12.6747	12.0247	15.9246
215	17.2246	18.8495	12.6747	12.3497	15.9246
216	17.2246	19.1745	12.6747	12.0247	15.5996
217	16.8996	18.5245	12.6747	12.0247	15.5996
218	17.5496	18.8495	12.6747	12.0247	15.5996
219	17.2246	18.8495	12.6747	12.3497	16.2496
220	17.5496	18.8495	12.3497	12.0247	15.9246
221	17.5496	18.8495	12.0247	12.0247	15.9246
222	17.2246	18.8495	12.0247	12.0247	15.5996
223	16.8996	18.8495	12.0247	12.0247	15.5996
224	16.8996	18.8495	12.0247	12.0247	15.5996
225	16.8996	18.8495	12.0247	12.3497	15.5996
226	17.2246	18.8495	12.0247	11.6997	15.2746
227	16.8996	18.8495	12.3497	12.3497	15.9246
228	17.2246	18.8495	12.3497	12.0247	15.9246
229	17.2246	19.1745	12.6747	12.0247	15.9246
230	16.8996	19.1745	12.6747	12.0247	15.5996
231	16.8996	18.8495	12.6747	12.0247	15.5996
232	16.8996	18.8495	12.3497	12.0247	15.9246
233	16.5746	18.8495	12.6747	12.0247	15.5996
234	16.8996	18.5245	12.9997	12.3497	16.2496
235	16.8996	18.8495	12.6747	12.0247	15.9246
236	17.2246	18.5245	12.6747	11.6997	16.2496
237	16.8996	18.5245	12.6747	12.0247	15.9246
238	16.8996	18.8495	12.6747	12.0247	15.9246
239	16.8996	18.8495	12.3497	11.6997	15.9246
240	16.8996	18.8495	12.6747	11.6997	15.9246
241	16.8996	18.8495	12.3497	11.6997	16.2496
242	16.8996	18.8495	12.6747	11.6997	16.2496
243	16.8996	18.8495	12.6747	11.6997	16.2496
244	17.2246	19.1745	12.3497	12.0247	15.9246
245	17.2246	18.8495	12.0247	12.3497	15.9246
246	17.2246	18.5245	12.3497	12.0247	15.9246
247	17.2246	18.8495	12.3497	11.6997	15.9246
248	17.2246	18.5245	12.3497	12.0247	16.5746
249	17.2246	18.5245	12.0247	12.0247	15.9246
250	17.2246	18.5245	12.3497	12.0247	16.2496
251	17.2246	18.5245	12.6747	12.0247	16.2496
252	17.5496	18.5245	12.6747	11.6997	16.2496
253	17.5496	18.5245	12.3497	12.0247	16.2496
254	17.5496	18.8495	12.6747	12.0247	15.5996
255	17.2246	18.8495	12.6747	11.6997	15.5996
256	17.5496	18.8495	12.3497	12.0247	16.5746
257	16.8996	18.8495	12.3497	11.6997	16.2496
258	17.2246	18.5245	12.3497	12.0247	16.2496
259	16.8996	18.8495	12.3497	11.6997	15.9246
260	16.8996	18.8495	12.3497	11.6997	16.2496
261	17.2246	18.8495	12.3497	12.3497	15.9246
262	16.8996	18.8495	12.3497	12.0247	16.2496
263	16.8996	18.8495	12.3497	11.6997	15.5996
264	16.5746	18.8495	12.3497	12.0247	15.9246
265	16.8996	18.8495	12.6747	12.0247	16.2496
266	16.5746	18.8495	12.3497	12.0247	15.9246
267	16.2496	18.5245	12.6747	11.6997	15.9246
268	16.5746	18.8495	12.3497	12.0247	15.9246
269	16.8996	18.5245	12.0247	11.6997	15.5996
270	16.5746	18.8495	12.6747	12.3497	15.9246
271	16.5746	18.5245	12.3497	12.3497	15.5996
272	16.2496	18.8495	12.3497	12.0247	15.9246
273	16.2496	18.8495	12.6747	12.0247	15.9246
274	16.2496	18.8495	12.3497	12.0247	15.5996
275	16.2496	18.8495	12.6747	12.0247	16.2496
276	16.2496	19.1745	12.0247	11.6997	15.9246
277	16.2496	18.8495	12.6747	12.0247	16.5746
278	16.2496	18.5245	12.6747	12.0247	16.8996
279	16.5746	18.5245	12.3497	12.6747	15.9246
280	16.2496	18.8495	12.3497	12.3497	16.2496
281	16.2496	18.5245	12.6747	12.3497	16.2496
282	16.5746	18.8495	12.3497	12.0247	16.2496
283	16.5746	18.8495	12.3497	11.6997	16.5746
284	16.5746	18.5245	12.0247	11.6997	16.2496
285	16.8996	18.8495	12.3497	12.3497	16.2496
286	16.8996	18.8495	12.6747	12.0247	16.2496
287	16.2496	18.8495	12.6747	12.3497	16.2496
288	16.5746	18.8495	12.6747	11.3747	16.2496
289	16.2496	18.8495	12.6747	12.0247	16.5746
290	16.5746	18.8495	12.6747	12.0247	16.2496
291	16.2496	19.1745	12.6747	12.0247	16.2496
292	16.5746	18.8495	12.6747	12.3497	16.2496
293	16.5746	18.8495	12.6747	12.3497	16.2496
294	16.5746	19.1745	12.6747	12.3497	16.2496
295	16.5746	18.8495	12.9997	11.6997	15.9246
296	16.8996	19.1745	12.9997	12.0247	15.9246
297	17.2246	18.5245	12.9997	12.3497	15.9246
298	17.2246	18.8495	12.9997	11.6997	16.5746
299	17.2246	18.8495	12.9997	12.0247	16.5746
300	17.2246	18.8495	12.9997	12.0247	16.2496
301	17.2246	18.8495	12.6747	11.6997	15.9246
302	17.2246	18.5245	12.9997	11.3747	15.9246
303	16.8996	19.1745	12.6747	11.6997	15.9246
304	17.2246	18.8495	12.9997	12.3497	16.2496
305	17.2246	18.8495	13.3247	12.0247	16.2496
306	17.5496	18.5245	12.6747	11.6997	15.5996
307	17.5496	18.8495	12.3497	11.3747	16.2496
308	17.8746	18.8495	12.6747	11.6997	15.9246
309	17.8746	18.8495	12.6747	12.0247	16.2496
310	17.5496	18.5245	12.9997	11.6997	15.5996
311	17.8746	18.5245	12.6747	12.0247	15.5996
312	17.2246	18.8495	12.6747	11.6997	15.5996
313	17.2246	18.8495	12.0247	11.6997	15.5996
314	17.2246	18.8495	11.6997	12.0247	15.9246
315	17.2246	18.8495	12.3497	11.6997	15.5996
316	17.2246	18.8495	12.0247	12.0247	16.2496
317	17.5496	18.5245	12.3497	12.0247	16.2496
318	17.5496	18.5245	12.3497	12.0247	16.5746
319	17.2246	19.1745	12.6747	12.0247	15.5996
320	17.2246	18.8495	12.6747	11.6997	16.2496
321	17.2246	18.8495	12.3497	12.0247	16.2496
322	17.2246	18.8495	12.3497	12.0247	15.9246
323	17.2246	18.8495	12.0247	12.0247	15.9246
324	17.5496	19.1745	12.0247	12.0247	15.5996
325	17.2246	18.8495	12.3497	12.0247	15.2746
326	17.5496	18.8495	12.3497	12.0247	16.2496
327	17.5496	18.5245	12.0247	11.6997	15.9246
328	17.5496	18.8495	12.3497	12.0247	15.5996
329	17.5496	18.8495	12.0247	12.0247	15.9246
330	17.2246	18.8495	12.0247	12.0247	16.2496
331	17.5496	18.8495	11.6997	12.0247	16.2496
332	17.5496	18.8495	12.0247	12.0247	15.5996
333	17.5496	19.1745	12.3497	12.0247	15.9246
334	17.2246	18.8495	12.3497	12.0247	15.9246
335	17.5496	18.8495	12.3497	12.0247	15.9246
336	17.2246	18.8495	12.3497	11.6997	15.5996
337	16.8996	18.8495	12.3497	12.0247	15.9246
338	17.2246	19.1745	12.6747	12.0247	16.2496
339	17.5496	18.5245	12.3497	12.0247	16.2496
340	16.8996	18.5245	12.3497	12.0247	16.2496
341	16.8996	18.5245	12.6747	12.0247	15.9246
342	16.8996	19.1745	12.6747	12.3497	16.2496
343	16.8996	18.5245	12.3497	12.3497	15.9246
344	16.5746	18.8495	12.6747	11.6997	16.2496
345	16.8996	18.8495	11.6997	12.0247	15.9246
346	16.5746	19.1745	12.3497	12.3497	16.2496
347	16.5746	18.8495	12.3497	12.3497	15.5996
348	16.8996	18.8495	12.6747	12.0247	16.5746
349	16.8996	18.8495	12.6747	12.0247	15.9246
350	17.2246	18.5245	12.3497	12.0247	16.2496
351	16.8996	19.1745	12.3497	12.0247	16.2496
352	16.8996	18.5245	12.3497	11.6997	16.2496
353	16.8996	18.8495	12.3497	12.0247	15.9246
354	16.8996	18.8495	12.6747	11.6997	15.9246
355	16.8996	19.1745	13.3247	12.0247	15.5996
356	16.8996	18.8495	13.3247	12.0247	15.5996
357	16.5746	18.8495	12.9997	12.0247	15.5996
358	16.5746	19.1745	12.9997	12.0247	15.5996
359	16.5746	18.5245	13.3247	12.3497	15.9246
360	16.8996	18.8495	12.9997	12.3497	16.2496
361	16.5746	18.8495	12.9997	12.0247	15.5996
362	16.8996	18.8495	13.3247	12.0247	16.2496
363	16.5746	18.5245	12.9997	12.0247	16.2496
364	16.8996	18.8495	12.9997	12.0247	15.9246
365	16.8996	18.5245	13.3247	12.0247	15.5996
366	16.8996	18.8495	13.6497	12.3497	16.5746
367	16.8996	19.1745	13.3247	12.0247	16.2496
368	16.8996	18.8495	12.9997	12.0247	16.2496
369	16.5746	18.8495	12.9997	12.0247	15.9246
370	16.8996	18.8495	12.3497	11.6997	16.2496
371	16.8996	19.1745	12.0247	12.0247	15.9246
372	17.2246	18.5245	12.3497	12.0247	15.5996
373	16.8996	18.8495	12.0247	12.0247	15.5996
374	17.2246	19.1745	12.6747	12.0247	15.9246
375	16.8996	18.8495	12.0247	12.0247	15.5996
376	17.2246	18.8495	12.0247	12.0247	16.2496
377	16.8996	18.8495	11.6997	12.0247	15.9246
378	16.8996	18.8495	12.3497	11.6997	15.5996
379	16.5746	19.1745	12.0247	12.0247	15.9246
380	16.8996	19.1745	12.3497	12.0247	15.9246
381	16.8996	18.8495	12.0247	12.0247	15.5996
382	16.8996	18.8495	12.0247	12.0247	15.2746
383	16.5746	18.5245	12.0247	12.0247	15.5996
384	16.5746	18.8495	11.6997	12.0247	15.9246
385	16.8996	18.8495	12.3497	12.0247	15.9246
386	16.8996	19.1745	12.3497	12.0247	15.5996
387	16.8996	18.8495	12.6747	11.6997	15.5996
388	16.8996	19.1745	12.6747	12.0247	15.5996
389	16.8996	19.1745	12.6747	11.6997	15.2746
390	16.8996	18.8495	12.3497	12.0247	15.9246
391	16.5746	19.1745	12.0247	12.0247	15.9246
392	16.8996	18.8495	12.6747	11.6997	15.5996
393	16.2496	18.8495	12.6747	11.3747	15.9246
394	16.5746	18.8495	12.3497	11.6997	16.2496
395	16.5746	19.1745	12.0247	11.6997	15.9246
396	16.5746	18.8495	12.6747	12.0247	16.5746
397	16.8996	19.1745	12.6747	11.6997	15.9246
398	16.5746	18.8495	12.6747	12.0247	15.9246
399	16.5746	18.5245	12.3497	12.3497	16.2496
400	16.2496	19.1745	12.3497	12.0247	15.5996
401	16.8996	19.1745	12.3497	12.0247	15.5996
402	16.5746	18.8495	12.3497	12.0247	15.9246
403	16.5746	18.8495	12.3497	12.0247	16.5746
404	16.2496	18.8495	12.0247	12.0247	15.9246
405	16.5746	18.8495	12.3497	12.0247	16.5746
406	16.5746	18.1995	12.3497	11.6997	16.2496
407	16.5746	18.5245	12.3497	12.0247	15.9246
408	16.2496	18.5245	12.3497	12.0247	16.2496
409	16.5746	18.8495	12.3497	12.0247	15.9246
410	16.2496	18.8495	12.0247	12.0247	16.2496
411	16.2496	18.8495	12.3497	12.0247	16.2496
412	16.5746	18.8495	12.3497	11.6997	16.2496
413	16.5746	18.8495	12.0247	11.6997	16.5746
414	16.5746	18.8495	12.0247	12.0247	16.2496
415	16.5746	18.8495	12.0247	11.6997	15.9246
416	16.5746	18.8495	12.3497	12.0247	16.2496
417	16.5746	18.8495	12.0247	12.0247	15.9246
418	16.8996	18.8495	12.6747	12.0247	15.9246
419	16.8996	18.5245	12.3497	12.3497	16.2496
420	16.8996	18.8495	12.0247	11.6997	15.9246
421	17.2246	18.8495	12.3497	12.0247	16.2496
422	17.2246	18.8495	12.3497	12.0247	16.2496
423	16.8996	18.5245	12.3497	11.6997	16.2496
424	16.8996	18.5245	12.3497	12.0247	16.2496
425	16.8996	18.8495	12.3497	12.0247	16.2496
426	17.2246	18.8495	12.0247	11.6997	16.5746
427	17.2246	18.5245	12.3497	12.0247	16.2496
428	16.8996	18.5245	12.3497	12.0247	16.2496
429	16.8996	18.8495	12.6747	12.0247	16.2496
430	16.5746	18.8495	12.3497	12.0247	16.2496
431	16.5746	18.5245	12.0247	12.0247	16.2496
432	17.2246	18.8495	12.0247	12.6747	16.2496
433	16.5746	18.8495	11.6997	12.3497	16.2496
434	16.5746	18.8495	12.3497	12.3497	16.2496
435	16.8996	18.5245	12.0247	12.6747	15.5996
436	16.8996	18.8495	12.0247	12.6747	15.5996
437	17.2246	18.8495	12.3497	12.3497	15.9246
438	16.8996	18.5245	12.3497	12.3497	16.2496
439	17.2246	18.8495	12.3497	12.3497	16.2496
440	17.2246	18.8495	12.0247	12.3497	16.2496
441	16.8996	19.1745	12.0247	12.3497	15.9246
442	16.8996	18.8495	12.0247	12.3497	16.5746
443	16.8996	19.1745	12.0247	12.3497	16.5746
444	16.8996	18.8495	12.3497	12.3497	16.2496
445	16.5746	19.1745	12.0247	12.3497	16.2496
446	16.8996	18.5245	12.0247	12.3497	15.5996
447	17.2246	18.8495	12.3497	12.3497	16.2496
448	16.8996	19.1745	12.6747	12.3497	15.9246
449	16.8996	18.5245	12.6747	12.3497	15.9246
450	16.5746	18.8495	12.6747	12.0247	16.8996
451	16.8996	19.1745	12.6747	12.3497	15.5996
452	16.5746	19.1745	12.6747	12.3497	15.5996
453	16.8996	19.1745	12.6747	12.3497	16.2496
454	16.5746	19.4995	12.0247	12.3497	16.2496
455	16.5746	19.1745	12.6747	12.3497	16.2496
456	16.5746	18.5245	12.6747	12.0247	15.9246
457	16.5746	19.1745	12.6747	12.3497	15.9246
458	16.8996	19.1745	12.9997	12.3497	15.5996
459	16.8996	18.5245	12.6747	12.3497	15.2746
460	17.2246	19.1745	12.6747	12.3497	15.5996
461	16.8996	18.8495	12.6747	12.3497	15.5996
462	16.8996	19.1745	12.6747	12.3497	15.5996
463	17.2246	18.8495	12.0247	12.6747	16.2496
464	16.8996	18.8495	12.6747	12.3497	15.5996
465	16.8996	18.5245	12.0247	12.3497	15.9246
466	16.8996	18.8495	12.3497	12.3497	15.5996
467	17.2246	18.8495	12.3497	12.3497	15.5996
468	17.2246	19.1745	12.0247	12.3497	15.2746
469	17.2246	19.1745	12.3497	12.3497	15.5996
470	16.8996	18.8495	12.3497	12.3497	16.2496
471	16.8996	19.4995	12.3497	12.3497	15.9246
472	17.2246	19.1745	12.6747	12.3497	15.9246
473	17.2246	18.5245	12.6747	12.6747	15.9246
474	16.5746	18.5245	12.9997	12.3497	15.9246
475	16.8996	18.5245	12.6747	12.3497	15.2746
476	16.8996	18.8495	12.9997	12.3497	15.9246
477	16.5746	18.8495	12.6747	12.6747	15.5996
478	16.8996	18.8495	13.3247	12.3497	15.5996
479	16.5746	19.1745	12.9997	12.3497	15.5996
480	16.8996	18.8495	12.6747	12.3497	15.9246
481	16.2496	18.8495	12.6747	12.6747	15.9246
482	16.5746	19.1745	12.6747	12.3497	15.5996
483	16.5746	18.8495	12.9997	12.3497	15.5996
484	16.5746	18.5245	12.3497	12.3497	15.5996
485	16.5746	18.8495	12.0247	12.6747	15.5996
486	16.8996	19.1745	12.3497	12.3497	16.2496
487	16.5746	18.5245	12.3497	12.3497	16.2496
488	16.5746	19.4995	12.3497	12.6747	15.5996
489	16.5746	19.1745	12.3497	12.6747	15.9246
490	16.5746	19.1745	12.0247	12.6747	16.2496
491	16.5746	18.5245	12.3497	12.6747	15.5996
492	16.5746	19.1745	12.6747	12.6747	16.5746
493	16.8996	19.1745	12.6747	12.6747	16.2496
494	16.8996	18.8495	12.6747	12.6747	16.2496
495	16.8996	19.1745	12.6747	12.6747	15.5996
496	16.5746	19.4995	12.6747	12.6747	16.2496
497	16.2496	19.1745	12.0247	12.6747	16.2496
498	16.5746	19.1745	12.6747	12.6747	15.9246
499	16.8996	18.8495	12.6747	12.3497	16.2496
500	16.8996	18.5245	12.6747	12.6747	15.9246
501	16.5746	18.8495	12.6747	12.6747	15.9246
502	17.2246	18.1995	12.6747	12.6747	16.5746
503	16.5746	18.8495	12.6747	12.6747	15.9246
504	16.8996	18.8495	12.3497	12.9997	15.9246
505	16.2496	19.1745	12.6747	12.6747	16.2496
506	16.5746	18.8495	13.3247	12.9997	15.5996
507	16.8996	19.4995	12.9997	12.6747	16.2496
508	16.5746	19.1745	13.3247	12.6747	15.9246
509	16.8996	18.8495	13.9747	12.6747	15.9246
510	17.2246	18.8495	13.6497	12.6747	15.9246
511	16.8996	19.4995	13.3247	12.9997	15.9246
512	16.5746	18.8495	13.6497	12.3497	15.9246
513	16.2496	18.1995	13.6497	12.3497	15.9246
514	16.2496	18.8495	13.3247	12.6747	15.9246
515	16.8996	19.1745	12.3497	12.6747	15.9246
516	16.2496	19.1745	13.3247	12.6747	16.2496
517	16.5746	18.8495	13.6497	12.3497	16.5746
518	16.5746	18.5245	13.6497	12.3497	16.2496
519	16.5746	19.1745	12.9997	12.6747	15.9246
520	16.2496	19.1745	13.9747	12.6747	15.9246
521	16.2496	19.4995	13.6497	12.3497	15.9246
522	16.5746	18.8495	13.3247	12.6747	15.9246
523	16.5746	18.8495	13.3247	12.3497	16.2496
524	16.5746	19.1745	12.9997	12.3497	15.5996
525	16.2496	19.1745	12.9997	12.6747	15.9246
526	16.5746	19.4995	12.9997	12.6747	15.9246
527	16.2496	19.1745	12.9997	12.6747	15.9246
528	16.2496	19.1745	13.3247	12.0247	15.9246
529	16.2496	19.1745	12.9997	12.3497	15.9246
530	15.9246	19.1745	12.6747	12.3497	14.9496
531	16.2496	19.1745	12.9997	12.0247	15.9246
532	16.2496	19.1745	13.3247	12.0247	16.2496
533	16.2496	18.5245	12.9997	12.3497	16.2496
534	16.2496	19.1745	13.3247	12.3497	15.9246
535	16.2496	18.5245	13.3247	12.3497	16.2496
536	15.9246	18.8495	13.3247	12.6747	16.2496
537	16.2496	18.8495	13.3247	12.3497	15.9246
538	15.9246	19.1745	13.3247	12.6747	16.2496
539	15.9246	19.4995	12.9997	12.3497	16.2496
540	16.5746	19.4995	12.9997	12.3497	16.2496
541	16.2496	19.1745	12.9997	12.0247	16.2496
542	16.2496	18.8495	12.9997	12.6747	15.9246
543	15.9246	19.1745	12.9997	12.6747	16.5746
544	16.2496	18.1995	13.3247	12.6747	15.9246
545	15.9246	19.4995	13.3247	12.6747	15.9246
546	16.5746	18.8495	12.9997	12.3497	15.9246
547	16.2496	19.1745	13.3247	12.6747	16.2496
548	16.5746	19.1745	12.6747	12.6747	15.9246
549	16.5746	19.1745	12.3497	12.3497	16.5746
550	16.5746	19.1745	12.6747	12.3497	15.9246
551	16.5746	18.8495	12.9997	12.0247	16.2496
552	16.5746	19.1745	12.9997	12.6747	16.8996
553	16.2496	18.5245	12.9997	12.6747	15.9246
554	16.2496	18.5245	12.9997	12.3497	16.2496
555	16.2496	19.1745	12.9997	12.3497	15.9246
556	16.2496	18.8495	13.3247	12.9997	15.9246
557	16.2496	18.8495	13.6497	12.3497	16.2496
558	16.5746	18.8495	13.6497	12.3497	15.9246
559	16.5746	18.5245	12.9997	12.6747	16.2496
560	16.5746	18.8495	13.3247	12.6747	16.2496
561	16.2496	18.5245	12.6747	12.6747	16.2496
562	16.8996	18.5245	12.9997	12.6747	15.9246
563	16.5746	19.1745	13.3247	12.3497	16.2496
564	16.5746	18.8495	12.9997	12.3497	16.2496
565	16.8996	18.8495	12.6747	12.6747	16.2496
566	16.2496	18.8495	12.6747	12.6747	16.2496
567	16.5746	19.1745	12.6747	12.3497	15.9246
568	16.5746	19.1745	12.3497	12.6747	16.5746
569	16.2496	19.4995	12.3497	12.3497	15.9246
570	16.5746	18.8495	13.3247	12.6747	15.9246
571	16.5746	18.5245	13.6497	12.6747	15.9246
572	16.5746	18.8495	12.9997	12.3497	16.2496
573	16.5746	18.5245	12.9997	12.0247	16.2496
574	16.8996	18.8495	12.9997	12.3497	16.5746
575	16.5746	19.1745	12.9997	12.3497	16.2496
576	16.8996	18.8495	13.3247	12.0247	16.2496
577	16.8996	18.1995	12.9997	12.3497	15.2746
578	16.8996	18.8495	12.9997	12.0247	16.5746
579	16.5746	18.5245	12.9997	12.3497	16.2496
580	16.5746	18.5245	12.9997	12.6747	16.2496
581	16.5746	18.8495	12.9997	12.3497	16.2496
582	16.5746	18.8495	12.9997	12.3497	15.9246
583	16.5746	19.1745	12.9997	12.0247	16.2496
584	16.2496	18.8495	12.9997	12.0247	16.2496
585	16.5746	19.1745	12.9997	12.6747	16.2496
586	16.5746	19.1745	12.6747	12.0247	15.9246
587	16.8996	19.1745	12.6747	12.3497	16.2496
588	16.5746	19.1745	12.9997	12.3497	15.9246
589	16.2496	17.8746	12.9997	12.6747	15.9246
590	15.9246	18.8495	13.3247	12.3497	16.5746
591	16.2496	18.8495	13.3247	12.0247	16.5746
592	16.2496	18.5245	13.3247	12.6747	16.2496
593	16.2496	18.8495	12.9997	12.6747	15.9246
594	16.2496	18.1995	13.3247	12.6747	16.5746
595	15.9246	19.1745	12.9997	12.6747	15.9246
596	16.2496	19.1745	12.6747	12.6747	16.2496
597	16.2496	19.1745	12.6747	12.6747	16.2496
598	16.2496	18.5245	12.9997	12.6747	16.2496
599	16.2496	18.8495	12.6747	12.3497	16.2496
600	16.2496	19.4995	12.0247	12.3497	16.5746
601	15.9246	18.8495	12.0247	12.6747	16.2496
602	15.9246	18.5245	12.3497	12.6747	16.2496
603	16.2496	19.1745	12.3497	12.3497	15.9246
604	15.9246	18.5245	12.0247	12.6747	16.2496
605	16.5746	18.5245	12.0247	12.3497	15.9246
606	16.2496	19.1745	12.3497	12.6747	16.2496
607	16.2496	18.8495	12.6747	12.3497	15.9246
608	16.2496	18.5245	12.3497	12.9997	16.2496
609	16.2496	18.5245	12.3497	12.6747	16.2496
610	16.2496	19.1745	12.3497	12.6747	15.9246
611	16.5746	18.5245	12.3497	12.6747	16.2496
612	15.9246	18.5245	12.6747	12.6747	15.5996
613	16.5746	18.5245	12.6747	12.3497	15.9246
614	16.5746	18.8495	12.9997	12.3497	15.9246
615	15.9246	18.8495	12.9997	12.6747	15.9246
616	15.9246	18.5245	13.3247	12.3497	16.2496
617	15.9246	18.8495	12.9997	12.6747	16.2496
618	16.2496	19.1745	13.3247	12.6747	16.2496
619	15.5996	18.5245	12.9997	12.6747	15.9246
620	16.5746	18.5245	12.3497	12.6747	16.5746
621	15.9246	18.5245	12.3497	12.6747	16.2496
622	16.8996	18.5245	12.6747	12.6747	15.9246
623	15.9246	19.1745	12.3497	12.6747	15.9246
624	15.9246	18.1995	12.6747	12.6747	16.2496
625	16.5746	18.8495	12.6747	12.6747	16.2496
626	15.9246	18.8495	12.3497	12.6747	15.5996
627	16.2496	18.5245	12.3497	12.6747	15.5996
628	16.2496	18.8495	12.6747	12.6747	16.2496
629	16.5746	18.8495	12.6747	12.6747	16.5746
630	15.9246	19.1745	12.6747	12.6747	15.9246
631	16.5746	18.8495	13.3247	12.6747	16.2496
632	16.5746	19.1745	12.6747	12.3497	16.5746
633	16.8996	18.8495	12.3497	12.3497	15.5996
634	16.5746	18.8495	12.0247	12.6747	15.9246
635	16.2496	18.1995	12.0247	12.6747	15.9246
636	15.9246	18.8495	12.9997	12.6747	16.5746
637	16.2496	18.5245	12.9997	12.6747	15.5996
638	15.9246	18.5245	12.9997	12.9997	15.9246
639	16.5746	18.5245	12.9997	12.6747	15.9246
640	16.5746	18.5245	12.9997	12.3497	16.2496
641	16.2496	18.5245	12.6747	12.3497	16.2496
642	16.5746	18.8495	12.6747	12.6747	15.9246
643	16.5746	19.1745	12.6747	12.3497	15.9246
644	16.5746	18.8495	12.9997	12.6747	15.9246
645	16.2496	19.1745	13.3247	12.9997	16.2496
646	16.5746	18.5245	12.6747	12.9997	15.9246
647	16.5746	18.8495	12.6747	12.6747	15.5996
648	16.2496	18.1995	13.3247	12.6747	16.2496
649	15.9246	19.1745	12.9997	12.6747	15.9246
650	16.2496	18.5245	12.6747	12.6747	15.9246
651	16.2496	19.1745	12.9997	12.9997	15.9246
652	16.5746	18.1995	12.9997	12.6747	15.9246
653	16.5746	19.1745	13.3247	12.6747	15.9246
654	16.5746	18.5245	13.3247	12.6747	15.9246
655	16.2496	18.8495	13.3247	12.6747	15.9246
656	15.9246	18.5245	13.3247	12.9997	15.5996
657	16.5746	19.1745	12.9997	12.9997	15.9246
658	16.2496	18.5245	13.3247	12.9997	16.2496
659	16.2496	18.8495	12.9997	12.6747	16.2496
660	16.8996	19.1745	12.9997	12.6747	15.9246
661	16.2496	19.1745	13.3247	12.6747	15.9246
662	16.5746	18.8495	13.3247	12.9997	15.9246
663	16.5746	18.8495	12.9997	12.3497	15.5996
664	16.5746	19.1745	13.3247	12.3497	16.5746
665	16.5746	19.1745	13.3247	12.3497	15.5996
666	16.5746	18.1995	13.6497	12.3497	15.5996
667	15.9246	19.4995	13.3247	12.9997	15.5996
668	16.2496	18.5245	13.3247	12.6747	15.9246
669	16.5746	18.8495	13.3247	12.3497	15.5996
670	16.5746	18.5245	12.9997	12.6747	15.2746
671	15.9246	18.1995	13.3247	12.6747	15.5996
672	15.9246	18.5245	12.9997	12.9997	15.5996
673	15.5996	18.5245	13.3247	12.6747	15.9246
674	16.2496	18.8495	13.3247	12.9997	15.9246
675	16.2496	18.1995	13.3247	12.3497	16.2496
676	16.2496	18.5245	13.3247	12.3497	15.5996
677	16.2496	18.5245	12.9997	12.6747	16.2496
678	15.9246	18.1995	13.3247	12.3497	15.9246
679	16.2496	18.8495	13.6497	12.6747	15.5996
680	16.5746	18.5245	13.3247	12.3497	15.5996
681	16.2496	18.1995	13.3247	12.6747	16.2496
682	16.2496	18.8495	13.6497	12.6747	15.5996
683	15.9246	18.1995	13.6497	12.6747	16.2496
684	16.5746	18.5245	13.6497	12.6747	15.5996
685	16.5746	18.5245	13.6497	12.6747	15.5996
686	16.2496	18.5245	13.6497	12.6747	15.5996
687	16.2496	18.1995	13.3247	12.3497	15.2746
688	16.5746	18.1995	13.6497	12.3497	15.9246
689	15.9246	19.1745	13.6497	12.6747	16.2496
690	16.5746	18.8495	13.3247	12.6747	15.9246
691	15.9246	18.5245	13.3247	12.6747	16.5746
692	16.2496	18.1995	13.3247	12.6747	15.9246
693	15.9246	18.8495	13.6497	12.6747	15.9246
694	16.2496	18.5245	13.6497	12.3497	15.5996
695	16.2496	18.5245	13.6497	12.6747	15.9246
696	15.9246	18.8495	13.6497	12.3497	16.5746
697	16.5746	18.1995	13.6497	12.6747	15.9246
698	15.9246	18.1995	13.6497	12.3497	15.5996
699	16.2496	18.5245	13.3247	12.6747	15.9246
700	16.5746	18.5245	13.3247	12.6747	15.9246
701	16.5746	18.5245	13.3247	12.6747	15.9246
702	16.2496	18.5245	12.9997	12.3497	16.2496
703	16.5746	17.8746	13.6497	12.6747	15.9246
704	16.2496	18.8495	13.3247	12.6747	16.2496
705	16.2496	18.5245	13.3247	12.6747	16.2496
706	16.2496	18.8495	12.6747	12.6747	16.5746
707	16.5746	18.5245	13.3247	12.6747	16.2496
708	16.2496	17.8746	12.0247	12.6747	16.2496
709	16.5746	18.5245	13.3247	12.6747	15.9246
710	16.5746	17.8746	12.9997	12.9997	15.5996
711	16.8996	18.8495	13.3247	12.6747	15.9246
712	16.2496	18.8495	12.9997	12.6747	15.9246
713	16.5746	17.8746	13.3247	12.6747	15.9246
714	16.5746	18.5245	12.9997	12.6747	16.5746
715	16.5746	18.8495	13.3247	12.9997	15.9246
716	16.5746	17.8746	12.6747	12.6747	15.9246
717	16.8996	18.5245	12.3497	12.6747	15.5996
718	16.5746	18.5245	12.6747	12.6747	15.9246
719	16.5746	18.1995	12.6747	12.6747	15.9246
720	16.2496	18.8495	12.6747	12.6747	15.5996
721	16.5746	18.8495	12.6747	12.6747	15.9246
722	16.5746	18.5245	12.9997	12.9997	15.9246
723	16.5746	18.1995	12.9997	12.6747	15.9246
724	16.2496	18.5245	12.6747	12.6747	15.9246
725	16.2496	18.5245	12.9997	12.6747	15.9246
726	16.5746	18.1995	12.6747	12.6747	15.9246
727	16.2496	18.8495	13.3247	12.6747	16.2496
728	15.5996	18.5245	12.6747	12.6747	15.9246
729	16.2496	18.8495	12.9997	12.9997	15.9246
730	15.9246	18.5245	13.3247	12.6747	15.9246
731	16.2496	18.1995	12.9997	12.6747	15.9246
732	15.9246	18.8495	11.6997	12.9997	15.9246
733	15.5996	18.8495	13.3247	12.9997	15.5996
734	15.9246	18.1995	13.3247	12.9997	15.5996
735	15.9246	18.8495	13.3247	12.9997	16.5746
736	15.9246	18.1995	13.3247	12.6747	16.2496
737	16.2496	18.5245	12.6747	12.6747	15.5996
738	15.9246	18.5245	13.3247	12.6747	16.2496
739	15.9246	18.1995	12.6747	12.6747	16.2496
740	15.9246	18.5245	12.6747	12.6747	15.9246
741	15.9246	18.1995	12.9997	12.6747	16.2496
742	15.9246	18.5245	12.9997	12.6747	15.9246
743	15.9246	18.5245	12.6747	12.6747	15.9246
744	16.2496	18.5245	12.9997	12.9997	16.2496
745	15.9246	18.1995	12.9997	12.9997	15.9246
746	16.2496	18.1995	13.3247	12.9997	15.9246
747	16.2496	18.5245	12.9997	13.3247	15.5996
748	15.9246	18.8495	13.3247	13.3247	15.9246
749	16.2496	18.5245	13.3247	12.9997	15.5996
750	15.9246	18.8495	12.9997	12.6747	15.5996
751	15.9246	18.5245	12.9997	12.6747	15.5996
752	16.5746	18.5245	12.9997	12.6747	15.9246
753	16.2496	18.1995	13.3247	12.6747	15.5996
754	16.2496	18.8495	12.9997	12.6747	15.9246
755	16.2496	18.5245	12.9997	12.6747	15.9246
756	16.2496	18.1995	13.3247	12.3497	15.5996
757	16.2496	18.8495	13.3247	12.6747	15.9246
758	16.5746	18.1995	13.3247	12.6747	16.2496
759	15.9246	18.1995	13.3247	12.9997	15.5996
760	15.9246	17.8746	12.6747	12.6747	15.9246
761	16.2496	18.1995	13.3247	12.6747	15.9246
762	15.9246	18.5245	13.3247	12.6747	16.2496
763	16.2496	18.5245	12.9997	12.6747	15.5996
764	16.2496	17.8746	12.9997	12.6747	15.5996
765	16.2496	18.5245	12.9997	12.6747	15.5996
766	16.2496	18.5245	12.9997	12.6747	15.5996
767	16.2496	17.8746	12.9997	12.6747	15.5996
768	16.2496	18.5245	12.9997	12.9997	15.9246
769	16.5746	18.1995	12.9997	12.6747	15.5996
770	16.2496	18.1995	12.6747	12.6747	15.5996
771	16.2496	18.1995	12.3497	12.9997	15.5996
772	15.9246	18.1995	13.3247	12.6747	15.5996
773	15.9246	19.4995	12.9997	12.6747	15.2746
774	16.2496	18.5245	13.3247	12.6747	15.5996
775	15.9246	18.1995	12.9997	12.0247	15.9246
776	16.5746	18.5245	13.3247	12.3497	15.9246
777	16.2496	18.8495	12.9997	12.6747	15.5996
778	16.2496	18.5245	12.9997	12.3497	15.2746
779	15.9246	18.1995	12.6747	12.3497	15.9246
780	16.2496	18.8495	12.6747	12.6747	15.9246
781	16.2496	18.8495	12.9997	12.3497	15.9246
782	15.9246	18.1995	12.9997	12.3497	15.2746
783	15.9246	18.1995	12.6747	12.3497	15.5996
784	16.2496	18.8495	12.9997	12.6747	15.2746
785	15.9246	18.5245	12.9997	12.6747	15.5996
786	15.9246	18.1995	12.9997	12.9997	14.9496
787	16.2496	19.1745	13.3247	12.6747	15.9246
788	15.9246	18.5245	12.9997	12.9997	15.5996
789	16.2496	18.8495	12.9997	12.6747	15.5996
790	15.9246	18.5245	12.9997	12.9997	15.5996
791	16.2496	18.1995	12.6747	12.6747	15.5996
792	16.2496	18.5245	12.3497	12.6747	15.9246
793	16.2496	18.1995	12.9997	12.9997	15.5996
794	15.9246	18.5245	12.6747	12.9997	15.5996
795	16.2496	18.5245	12.9997	12.6747	15.2746
796	16.2496	18.5245	12.9997	12.9997	15.9246
797	16.2496	18.5245	12.3497	12.9997	15.5996
798	15.5996	18.5245	12.6747	12.9997	15.5996
799	16.2496	18.8495	12.9997	12.3497	15.5996
800	15.9246	18.5245	12.6747	12.9997	14.9496
801	15.9246	18.1995	12.9997	12.9997	15.2746
802	16.2496	17.8746	12.6747	12.9997	15.9246
803	16.2496	18.1995	13.3247	12.9997	15.9246
804	16.2496	18.1995	12.6747	12.9997	15.9246
805	16.2496	17.8746	12.9997	12.6747	16.5746
806	16.2496	19.1745	12.9997	12.6747	15.9246
807	16.2496	18.5245	12.9997	12.6747	15.9246
808	16.2496	17.8746	13.6497	12.6747	15.9246
809	16.2496	18.5245	13.3247	12.3497	15.9246
810	16.2496	17.8746	13.3247	12.3497	15.9246
811	16.2496	19.1745	13.3247	12.3497	15.9246
812	16.2496	18.8495	12.9997	12.3497	15.9246
813	16.2496	17.8746	12.9997	12.3497	16.2496
814	16.2496	18.5245	12.9997	12.0247	15.5996
815	16.2496	18.5245	12.9997	12.9997	15.5996
816	16.2496	18.1995	12.6747	12.9997	15.5996
817	16.5746	18.1995	12.6747	12.6747	15.9246
818	16.2496	18.1995	12.6747	12.6747	15.5996
819	16.2496	18.5245	12.9997	12.6747	15.9246
820	15.9246	18.5245	12.9997	12.3497	15.9246
821	16.2496	18.5245	12.9997	12.6747	15.9246
822	16.5746	18.1995	12.9997	12.9997	15.5996
823	16.5746	18.1995	12.9997	12.6747	15.5996
824	16.2496	18.8495	13.3247	12.9997	15.2746
825	15.9246	17.8746	12.6747	12.9997	15.9246
826	16.2496	18.1995	12.6747	12.3497	15.2746
827	16.2496	18.5245	12.3497	12.6747	15.2746
828	16.2496	18.1995	12.3497	12.6747	15.9246
829	16.2496	18.8495	11.6997	12.9997	15.9246
830	15.9246	17.8746	12.3497	12.6747	15.2746
831	16.2496	18.1995	12.0247	12.6747	15.9246
832	16.2496	18.1995	12.3497	12.9997	15.5996
833	15.9246	18.8495	12.6747	12.6747	15.2746
834	16.2496	18.1995	12.9997	12.9997	15.9246
835	16.2496	18.1995	12.9997	12.3497	15.2746
836	15.9246	18.1995	13.3247	12.6747	15.2746
837	16.2496	18.5245	13.3247	12.9997	16.2496
838	16.5746	17.8746	13.3247	12.3497	15.5996
839	16.5746	18.5245	13.6497	12.6747	15.5996
840	16.5746	18.5245	13.3247	12.6747	15.2746
841	15.9246	18.1995	13.3247	12.6747	15.5996
842	16.5746	18.8495	13.6497	12.6747	16.5746
843	16.2496	18.8495	13.3247	12.6747	15.2746
844	15.9246	18.1995	13.6497	12.6747	15.9246
845	16.2496	18.5245	13.3247	12.6747	15.5996
846	16.2496	18.5245	13.3247	12.6747	15.2746
847	15.9246	19.1745	13.3247	12.9997	15.5996
848	16.2496	18.1995	13.3247	12.9997	15.9246
849	16.2496	18.8495	12.9997	12.9997	15.2746
850	16.2496	18.1995	12.9997	12.9997	15.2746
851	16.2496	18.8495	12.6747	12.9997	15.2746
852	16.5746	18.8495	12.9997	12.6747	15.5996
853	16.2496	18.1995	13.3247	12.9997	14.9496
854	16.2496	18.8495	12.9997	12.9997	15.9246
855	16.2496	18.5245	13.3247	12.9997	15.5996
856	16.2496	18.5245	12.6747	12.9997	15.5996
857	16.5746	18.8495	13.6497	12.6747	15.2746
858	16.2496	18.5245	12.6747	12.9997	15.5996
859	16.5746	18.5245	12.6747	12.6747	15.5996
860	16.2496	18.8495	12.9997	12.9997	15.5996
861	15.9246	17.8746	12.9997	12.9997	15.2746
862	16.5746	18.5245	13.3247	12.6747	15.2746
863	16.2496	18.5245	13.3247	12.6747	15.5996
864	15.9246	18.8495	13.3247	12.6747	15.5996
865	16.2496	19.1745	13.3247	12.9997	15.5996
866	16.5746	18.8495	12.9997	12.9997	15.5996
867	16.2496	18.1995	12.9997	12.9997	15.5996
868	16.5746	18.5245	13.3247	12.6747	15.5996
869	16.2496	18.5245	13.3247	12.9997	15.5996
870	16.2496	18.8495	13.3247	12.9997	15.5996
871	16.5746	18.8495	13.6497	12.9997	15.5996
872	16.5746	19.1745	13.3247	12.9997	15.5996
873	16.5746	18.8495	13.3247	12.9997	15.5996
874	16.2496	18.5245	13.3247	12.9997	15.5996
875	16.8996	19.1745	12.9997	12.9997	15.5996
876	16.8996	18.5245	12.9997	12.6747	15.5996
877	16.2496	18.5245	13.9747	12.6747	15.9246
878	16.5746	19.1745	13.3247	12.6747	15.9246
879	16.2496	18.1995	13.6497	12.9997	15.5996
880	16.5746	18.5245	13.6497	12.6747	15.2746
881	15.9246	18.5245	13.6497	12.6747	15.2746
882	16.2496	18.8495	13.6497	12.6747	15.5996
883	16.2496	19.1745	13.3247	12.6747	15.5996
884	16.2496	18.8495	13.6497	12.6747	16.2496
885	16.5746	17.8746	13.6497	12.6747	16.2496
886	16.2496	18.1995	13.6497	12.6747	15.5996
887	16.2496	18.1995	13.3247	12.6747	15.5996
888	16.2496	18.1995	12.9997	12.6747	15.5996
889	16.5746	18.8495	12.9997	12.6747	15.5996
890	16.5746	18.1995	12.9997	12.6747	15.9246
891	16.5746	17.8746	12.6747	12.6747	15.5996
892	16.5746	19.1745	12.9997	12.6747	15.9246
893	16.8996	18.5245	12.6747	12.6747	15.5996
894	16.5746	18.8495	12.9997	12.6747	15.5996
895	16.5746	19.1745	12.3497	12.6747	15.5996
896	16.2496	18.5245	12.9997	12.6747	15.2746
897	16.2496	18.5245	12.6747	12.6747	15.5996
898	16.5746	18.1995	12.6747	12.9997	15.2746
899	16.8996	18.1995	12.9997	12.6747	15.5996
900	16.5746	18.5245	12.6747	12.6747	15.2746
901	16.5746	18.1995	12.3497	12.9997	15.5996
902	16.5746	18.1995	12.6747	12.6747	15.2746
903	16.5746	18.5245	12.3497	12.6747	15.2746
904	16.5746	19.1745	12.6747	12.6747	15.2746
905	16.5746	18.8495	12.9997	12.6747	15.9246
906	15.9246	18.1995	12.9997	12.9997	15.5996
907	16.2496	18.1995	13.3247	12.6747	15.5996
908	15.9246	19.1745	12.9997	12.6747	15.2746
909	16.2496	18.1995	13.3247	12.6747	15.2746
910	16.5746	18.5245	12.9997	12.9997	15.5996
911	16.2496	18.8495	13.3247	12.9997	15.2746
912	16.2496	18.8495	12.6747	12.6747	15.5996
913	16.2496	18.5245	12.9997	12.9997	15.2746
914	16.5746	18.5245	13.3247	12.6747	15.5996
915	16.2496	18.1995	12.9997	12.9997	15.9246
916	16.5746	18.5245	12.6747	12.6747	15.5996
917	16.2496	18.1995	12.9997	12.6747	15.2746
918	16.5746	18.8495	12.9997	12.9997	15.2746
919	15.9246	18.5245	12.9997	12.9997	15.5996
920	16.2496	18.1995	12.9997	12.6747	15.9246
921	16.2496	18.1995	12.9997	12.6747	15.2746
922	16.2496	18.5245	12.9997	12.6747	15.5996
923	16.2496	18.1995	13.3247	12.6747	15.2746
924	15.9246	18.1995	13.3247	12.3497	15.5996
925	15.9246	18.5245	12.9997	12.6747	15.2746
926	15.9246	19.1745	13.3247	12.6747	16.2496
927	16.2496	18.5245	12.9997	12.6747	15.9246
928	15.9246	19.1745	13.3247	12.6747	15.9246
929	16.2496	18.5245	12.9997	12.9997	15.9246
930	15.9246	18.1995	12.9997	12.6747	15.2746
931	16.2496	18.1995	12.9997	12.6747	15.2746
932	16.8996	19.1745	13.3247	12.6747	15.5996
933	16.5746	18.1995	13.3247	12.6747	15.5996
934	16.8996	18.8495	12.9997	12.6747	15.5996
935	16.8996	18.5245	13.6497	12.9997	15.2746
936	16.5746	19.1745	13.3247	12.9997	15.5996
937	16.8996	19.1745	12.9997	12.9997	15.5996
938	16.5746	18.8495	13.3247	12.9997	15.5996
939	16.2496	18.5245	13.9747	12.9997	15.2746
940	16.5746	18.1995	13.3247	12.9997	15.2746
941	16.5746	18.1995	13.3247	12.9997	15.2746
942	16.2496	19.1745	12.9997	12.9997	15.5996
943	16.8996	18.1995	13.3247	12.6747	15.9246
944	16.5746	18.5245	13.3247	12.6747	15.2746
945	16.5746	19.1745	13.6497	12.3497	15.5996
946	16.5746	18.5245	12.9997	12.6747	15.5996
947	16.8996	18.8495	13.3247	12.3497	15.5996
948	16.5746	19.1745	13.3247	12.6747	15.5996
949	16.8996	18.1995	13.3247	12.3497	15.5996
950	16.8996	18.5245	13.3247	12.9997	15.5996
951	16.8996	18.8495	12.9997	12.6747	15.5996
952	16.5746	18.1995	13.9747	12.9997	15.5996
953	16.5746	18.5245	13.3247	12.6747	15.2746
954	16.5746	17.8746	13.6497	12.9997	15.2746
955	17.2246	19.4995	13.3247	12.9997	15.5996
956	16.5746	18.1995	13.3247	12.6747	15.5996
957	16.8996	18.5245	13.3247	12.3497	15.5996
958	16.5746	19.1745	13.3247	12.6747	15.2746
959	16.5746	18.5245	13.6497	12.6747	15.5996
960	16.5746	18.5245	13.6497	12.9997	15.5996
961	16.2496	18.5245	13.9747	12.6747	15.2746
962	16.8996	18.8495	13.9747	12.3497	15.5996
963	16.8996	18.8495	13.6497	12.6747	15.5996
964	16.8996	18.5245	13.3247	12.9997	15.2746
965	16.5746	18.1995	13.6497	12.6747	15.2746
966	16.5746	18.8495	13.9747	12.3497	15.9246
967	16.5746	18.8495	13.3247	12.6747	15.5996
968	16.5746	19.1745	13.3247	12.3497	15.5996
969	16.8996	18.1995	13.3247	12.6747	15.5996
970	16.5746	19.1745	13.3247	12.9997	15.2746
971	16.8996	19.1745	13.3247	12.6747	15.2746
972	16.5746	19.1745	13.3247	12.6747	15.5996
973	16.5746	18.1995	13.3247	12.6747	15.5996
974	16.5746	18.1995	13.3247	12.6747	15.9246
975	16.8996	19.4995	13.3247	12.6747	15.5996
976	16.8996	18.1995	13.3247	12.6747	15.5996
977	16.5746	18.8495	13.9747	12.3497	15.5996
978	16.5746	19.4995	13.3247	12.6747	15.5996
979	16.5746	18.1995	13.3247	12.9997	15.5996
980	16.2496	18.1995	13.3247	12.3497	15.2746
981	16.8996	19.1745	13.3247	12.3497	15.5996
982	16.8996	18.5245	13.3247	12.3497	15.5996
983	16.8996	18.8495	13.3247	12.6747	15.2746
984	17.2246	19.4995	13.3247	12.6747	14.9496
985	16.2496	19.8245	13.3247	12.6747	15.9246
986	16.5746	19.1745	13.3247	12.3497	15.5996
987	16.2496	19.1745	12.9997	12.3497	15.5996
988	15.9246	18.5245	13.3247	12.3497	15.5996
989	16.2496	18.1995	13.6497	12.3497	15.2746
990	15.9246	19.1745	13.3247	12.3497	15.5996
991	16.5746	18.8495	13.6497	12.3497	15.9246
992	16.5746	18.5245	13.3247	12.3497	15.5996
993	16.5746	19.1745	13.3247	12.0247	15.9246
994	16.8996	18.5245	13.3247	12.6747	16.2496
995	16.5746	18.1995	13.6497	12.0247	15.9246
996	16.8996	18.8495	13.6497	12.3497	15.9246
997	16.5746	18.5245	13.3247	12.0247	15.5996
998	16.8996	18.8495	13.3247	12.3497	15.2746
999	16.8996	19.1745	13.6497	12.0247	15.9246
1000	16.8996	18.8495	13.3247	12.3497	15.5996
1001	16.8996	19.1745	13.6497	12.3497	15.2746
1002	16.2496	18.1995	13.6497	12.3497	15.5996
1003	16.2496	18.8495	13.3247	12.0247	15.9246
1004	16.5746	17.8746	13.6497	12.0247	15.5996
1005	16.5746	18.8495	13.9747	12.6747	15.5996
1006	16.8996	18.5245	13.6497	12.0247	15.9246
1007	16.8996	19.1745	14.2996	12.0247	15.2746
1008	16.2496	18.8495	13.9747	12.3497	15.5996
1009	16.5746	18.1995	13.6497	12.3497	15.5996
1010	16.5746	19.1745	13.6497	12.3497	15.9246
1011	16.5746	18.8495	13.9747	12.3497	15.9246
1012	16.5746	18.5245	13.6497	12.6747	15.9246
1013	15.9246	18.8495	13.3247	12.3497	15.2746
1014	16.8996	18.8495	13.6497	12.3497	15.9246
1015	16.5746	19.1745	13.3247	12.3497	15.5996
1016	16.5746	19.1745	13.6497	12.3497	15.9246
1017	16.5746	18.8495	13.6497	12.0247	15.5996
1018	16.5746	18.8495	13.6497	12.3497	15.2746
1019	16.5746	19.1745	13.3247	12.0247	16.2496
1020	16.5746	18.5245	13.6497	12.0247	15.5996
1021	16.5746	18.5245	13.9747	12.3497	15.5996
1022	16.8996	18.8495	13.3247	12.3497	15.2746
1023	16.2496	18.1995	13.3247	12.0247	15.5996
1024	16.8996	18.8495	13.6497	12.0247	15.9246
1025	16.8996	19.1745	13.3247	12.0247	15.9246
1026	16.2496	18.8495	13.3247	12.0247	15.5996
1027	16.5746	19.1745	13.3247	12.3497	15.5996
1028	16.8996	18.1995	13.6497	12.3497	15.5996
1029	16.5746	18.8495	13.3247	12.3497	16.2496
1030	16.8996	18.5245	13.6497	12.0247	15.9246
1031	16.8996	18.8495	13.6497	12.3497	15.5996
1032	17.2246	19.1745	13.3247	12.3497	15.2746
1033	16.8996	19.4995	13.9747	12.0247	15.2746
1034	16.8996	19.1745	13.6497	12.6747	15.5996
1035	16.8996	17.8746	13.6497	12.6747	15.2746
1036	16.5746	18.5245	13.6497	12.0247	15.2746
1037	16.8996	18.5245	13.6497	12.3497	15.5996
1038	16.8996	18.1995	13.3247	12.3497	14.9496
1039	16.8996	18.8495	13.6497	12.6747	15.5996
1040	16.5746	19.1745	13.6497	12.3497	15.5996
1041	17.2246	18.1995	13.9747	12.3497	15.5996
1042	16.5746	18.8495	13.6497	12.0247	15.2746
1043	16.5746	17.8746	13.6497	12.0247	15.5996
1044	17.2246	17.8746	13.9747	12.0247	15.5996
1045	16.8996	18.1995	13.3247	12.0247	15.5996
1046	16.8996	18.8495	13.6497	12.0247	15.2746
1047	16.5746	19.1745	13.3247	12.3497	15.5996
1048	16.5746	19.4995	12.6747	12.0247	15.9246
1049	16.8996	18.5245	12.6747	12.0247	15.5996
1050	17.2246	17.8746	12.6747	12.0247	15.2746
1051	16.8996	18.1995	12.9997	12.3497	15.5996
1052	16.8996	18.8495	12.9997	12.0247	15.5996
1053	16.8996	17.8746	13.3247	12.3497	15.5996
1054	16.8996	17.8746	13.6497	12.0247	15.9246
1055	16.8996	18.1995	13.6497	12.0247	15.2746
1056	16.8996	19.1745	13.3247	12.0247	15.2746
1057	16.8996	18.1995	13.3247	12.3497	15.5996
1058	17.2246	18.8495	13.3247	12.0247	15.2746
1059	16.8996	19.1745	12.6747	12.3497	14.9496
1060	16.8996	18.8495	12.9997	12.3497	15.2746
1061	17.2246	19.8245	12.9997	12.0247	15.2746
1062	17.2246	17.8746	13.3247	12.3497	15.2746
1063	16.8996	19.4995	13.3247	12.3497	15.5996
1064	16.8996	19.1745	13.3247	12.3497	15.2746
1065	16.8996	17.8746	13.3247	12.3497	15.2746
1066	16.8996	18.5245	13.3247	12.3497	15.5996
1067	16.8996	18.5245	13.3247	12.3497	15.2746
1068	16.8996	18.5245	13.3247	12.3497	15.5996
1069	16.8996	19.1745	13.9747	12.3497	15.2746
1070	17.2246	18.8495	13.3247	12.3497	15.2746
1071	16.8996	18.5245	13.6497	12.3497	15.2746
1072	16.5746	18.1995	13.3247	12.0247	15.2746
1073	16.8996	18.5245	13.3247	12.3497	15.2746
1074	16.8996	17.8746	13.6497	12.6747	15.2746
1075	16.8996	19.4995	13.6497	12.3497	15.5996
1076	16.8996	18.1995	13.6497	12.3497	15.2746
1077	16.8996	18.5245	13.3247	12.3497	15.5996
1078	16.8996	17.8746	13.6497	12.6747	15.2746
1079	16.8996	18.8495	13.3247	12.0247	15.2746
1080	16.5746	18.8495	13.3247	11.6997	15.2746
1081	16.5746	18.8495	13.6497	11.3747	15.2746
1082	16.8996	20.1495	13.3247	11.6997	15.2746
1083	16.8996	19.4995	13.3247	11.6997	15.2746
1084	17.2246	19.8245	13.3247	11.6997	15.2746
1085	16.8996	19.4995	13.3247	12.0247	15.5996
1086	16.8996	19.8245	13.6497	11.6997	15.2746
1087	16.8996	19.8245	12.9997	12.3497	15.5996
1088	16.8996	19.8245	13.6497	12.0247	15.9246
1089	16.8996	20.1495	13.6497	12.0247	16.2496
1090	16.2496	20.1495	13.3247	11.6997	15.2746
1091	16.8996	19.8245	13.3247	12.0247	15.5996
1092	16.5746	20.1495	13.3247	12.3497	15.5996
1093	16.5746	20.1495	13.3247	11.6997	15.5996
1094	16.8996	20.1495	12.3497	12.0247	15.5996
1095	16.5746	19.4995	12.0247	11.6997	15.9246
1096	16.2496	20.1495	12.0247	12.0247	15.5996
1097	16.2496	20.1495	12.0247	12.0247	15.5996
1098	16.5746	19.4995	13.3247	12.3497	15.2746
1099	16.8996	19.8245	13.6497	12.0247	14.9496
1100	16.5746	19.8245	13.3247	12.3497	15.5996
1101	16.5746	19.8245	12.6747	11.6997	15.5996
1102	16.5746	19.8245	13.3247	11.6997	15.5996
1103	16.8996	19.8245	12.3497	11.6997	15.5996
1104	16.2496	19.8245	13.9747	11.6997	15.5996
1105	16.8996	19.8245	13.6497	11.6997	15.2746
1106	16.5746	20.1495	13.3247	12.0247	15.2746
1107	16.5746	19.8245	13.3247	12.0247	14.9496
1108	16.5746	19.4995	13.6497	12.0247	15.2746
1109	16.8996	19.8245	13.3247	11.3747	15.5996
1110	16.2496	19.4995	13.6497	12.6747	15.9246
1111	16.2496	19.8245	13.3247	12.0247	15.5996
1112	16.5746	19.8245	13.6497	11.6997	15.2746
1113	15.9246	19.4995	13.9747	11.3747	15.2746
1114	16.5746	19.8245	12.9997	11.3747	15.2746
1115	16.5746	20.1495	13.3247	11.6997	15.5996
1116	16.2496	20.1495	13.3247	12.3497	15.2746
1117	16.5746	20.1495	13.3247	12.3497	15.5996
1118	16.5746	19.8245	13.6497	12.3497	15.5996
1119	16.2496	19.4995	12.9997	12.0247	15.5996
1120	16.5746	20.1495	13.6497	12.0247	15.9246
1121	16.2496	19.8245	13.6497	11.6997	15.5996
1122	16.5746	20.1495	13.9747	11.6997	15.2746
1123	16.2496	19.8245	13.6497	11.3747	15.5996
1124	16.5746	20.1495	13.6497	12.0247	14.9496
1125	16.5746	20.1495	13.3247	12.0247	15.9246
1126	16.5746	19.8245	12.9997	12.3497	15.5996
1127	16.5746	20.4745	13.6497	12.0247	15.5996
1128	16.2496	19.4995	13.6497	12.0247	14.9496
1129	16.5746	19.8245	13.3247	12.3497	14.9496
1130	16.2496	19.8245	13.3247	12.3497	15.2746
1131	16.5746	19.4995	13.3247	12.0247	15.5996
1132	16.2496	19.4995	13.3247	12.0247	15.2746
1133	16.2496	19.8245	13.3247	12.0247	15.9246
1134	16.5746	19.8245	13.3247	12.0247	15.5996
1135	16.2496	20.1495	13.6497	12.6747	14.9496
1136	16.2496	19.4995	13.3247	12.3497	15.2746
1137	16.2496	19.8245	12.9997	12.3497	15.2746
1138	16.2496	19.8245	13.3247	12.0247	14.9496
1139	16.5746	19.8245	13.3247	12.6747	15.2746
1140	16.2496	19.8245	12.9997	12.9997	14.9496
1141	16.8996	19.4995	12.9997	12.6747	15.2746
1142	16.5746	19.8245	13.3247	12.6747	15.2746
1143	16.5746	19.8245	12.9997	12.3497	15.5996
1144	16.5746	19.8245	12.9997	11.6997	15.2746
1145	16.5746	19.8245	12.6747	11.6997	15.5996
1146	16.5746	19.4995	12.6747	12.3497	15.5996
1147	16.5746	19.8245	12.9997	12.3497	15.5996
1148	16.5746	19.8245	12.9997	12.0247	14.9496
1149	16.5746	19.8245	12.9997	11.6997	15.9246
1150	16.5746	20.1495	12.9997	12.3497	15.2746
1151	16.8996	20.1495	12.9997	11.6997	15.5996
1152	16.5746	19.8245	13.6497	12.0247	15.2746
1153	16.8996	19.8245	13.3247	12.3497	15.2746
1154	16.5746	20.1495	13.3247	12.3497	15.5996
1155	17.2246	19.8245	12.9997	12.3497	15.5996
1156	16.8996	20.1495	12.9997	12.3497	15.2746
1157	16.8996	20.1495	12.6747	12.0247	15.5996
1158	17.2246	19.4995	13.3247	12.3497	16.5746
1159	17.5496	20.1495	13.3247	12.3497	15.2746
1160	16.8996	19.8245	12.3497	12.6747	14.9496
1161	16.8996	19.8245	12.9997	12.3497	15.2746
1162	17.2246	19.1745	12.9997	12.0247	15.5996
1163	16.8996	19.4995	12.9997	12.3497	14.9496
1164	16.5746	19.4995	12.9997	12.3497	15.5996
1165	17.2246	19.8245	12.9997	12.0247	15.5996
1166	16.8996	19.8245	13.3247	12.3497	15.2746
1167	16.8996	19.4995	13.3247	12.6747	15.5996
1168	16.8996	19.1745	12.9997	12.0247	15.5996
1169	16.8996	19.8245	13.6497	12.0247	15.5996
1170	16.8996	19.4995	13.3247	12.3497	15.2746
1171	16.8996	19.4995	12.9997	12.0247	15.9246
1172	16.8996	19.8245	13.6497	12.6747	15.5996
1173	16.8996	19.4995	13.6497	11.6997	14.9496
1174	16.8996	19.1745	13.9747	12.0247	15.5996
1175	16.8996	19.1745	13.9747	12.6747	14.9496
1176	16.8996	20.1495	13.6497	12.3497	15.2746
1177	16.8996	19.1745	12.9997	11.6997	14.9496
1178	16.8996	19.4995	12.9997	12.6747	15.2746
1179	16.8996	19.4995	13.3247	11.6997	15.5996
1180	17.2246	19.8245	13.9747	12.3497	15.5996
1181	16.8996	19.8245	12.9997	12.3497	15.5996
1182	17.2246	19.8245	13.3247	12.3497	15.2746
1183	16.8996	19.4995	12.9997	13.3247	15.5996
1184	17.2246	19.8245	13.3247	12.6747	15.2746
1185	16.8996	19.4995	13.3247	12.6747	14.9496
1186	17.2246	19.8245	12.9997	12.9997	15.5996
1187	17.5496	19.4995	12.9997	12.9997	15.2746
1188	17.8746	19.4995	12.9997	12.9997	15.2746
1189	17.2246	19.4995	13.6497	12.9997	15.2746
1190	17.2246	19.8245	13.3247	12.9997	14.9496
1191	17.2246	19.8245	13.6497	12.6747	15.9246
1192	17.2246	19.8245	12.9997	11.6997	15.9246
1193	17.2246	19.4995	12.9997	12.6747	15.5996
1194	16.8996	19.8245	12.9997	12.9997	15.9246
1195	17.2246	19.8245	13.3247	12.6747	15.9246
1196	16.5746	19.4995	12.9997	12.9997	15.2746
1197	17.2246	19.1745	13.6497	12.6747	15.5996
1198	16.8996	19.1745	12.9997	12.9997	15.9246
1199	17.2246	19.4995	12.9997	12.3497	14.9496
1200	16.5746	19.4995	12.9997	12.6747	15.9246
1201	16.5746	19.8245	12.3497	12.6747	15.5996
1202	17.2246	19.8245	12.9997	12.0247	15.2746
1203	16.8996	19.4995	13.6497	12.0247	15.9246
1204	17.2246	19.1745	12.9997	12.3497	15.5996
1205	16.8996	19.8245	13.3247	12.6747	15.5996
1206	16.8996	19.8245	12.9997	12.3497	16.2496
1207	16.8996	20.1495	13.3247	12.6747	15.9246
1208	16.8996	19.8245	12.9997	12.3497	15.9246
1209	16.8996	19.4995	13.3247	12.3497	15.9246
1210	16.8996	19.4995	12.9997	11.6997	15.9246
1211	16.5746	19.8245	12.9997	12.9997	15.2746
1212	16.8996	19.1745	13.3247	12.6747	15.2746
1213	16.8996	19.8245	13.3247	13.3247	15.5996
1214	17.2246	19.4995	12.9997	12.9997	15.9246
1215	16.8996	19.1745	12.9997	12.9997	15.2746
1216	17.2246	19.8245	13.6497	13.3247	15.5996
1217	16.5746	19.8245	13.3247	12.6747	15.5996
1218	16.8996	19.4995	13.6497	12.3497	15.5996
1219	17.2246	19.8245	12.6747	12.3497	15.5996
1220	16.8996	19.4995	12.9997	12.6747	15.2746
1221	16.5746	19.8245	13.6497	12.6747	15.2746
1222	16.5746	19.8245	12.9997	12.9997	15.5996
1223	17.2246	19.4995	12.9997	12.6747	15.9246
1224	16.8996	19.8245	13.3247	12.3497	15.9246
1225	17.2246	19.8245	13.3247	12.6747	15.9246
1226	16.8996	19.8245	13.3247	12.9997	15.9246
1227	16.8996	19.8245	12.9997	12.6747	15.5996
1228	16.8996	19.8245	12.6747	12.6747	15.5996
1229	17.5496	19.4995	12.3497	12.3497	16.2496
1230	16.8996	19.8245	12.6747	12.6747	16.2496
1231	16.8996	19.4995	12.6747	12.0247	15.5996
1232	17.2246	19.4995	12.6747	11.6997	15.5996
1233	17.2246	20.1495	12.9997	12.3497	16.2496
1234	17.2246	19.8245	13.3247	12.3497	15.5996
1235	17.2246	19.8245	12.3497	12.6747	15.5996
1236	16.5746	19.4995	12.6747	12.9997	15.5996
1237	16.8996	19.4995	12.9997	12.6747	15.2746
1238	16.8996	19.4995	12.3497	13.3247	15.9246
1239	16.8996	19.4995	12.9997	12.6747	15.9246
1240	16.5746	19.1745	12.9997	12.6747	15.9246
1241	16.8996	19.4995	12.9997	12.3497	15.5996
1242	17.2246	19.8245	13.3247	12.6747	15.9246
1243	17.2246	19.4995	12.6747	12.3497	15.9246
1244	16.5746	19.8245	12.9997	12.3497	15.9246
1245	16.8996	19.4995	12.6747	12.0247	15.5996
1246	16.5746	19.4995	12.9997	12.3497	15.9246
1247	16.5746	19.4995	12.6747	12.6747	15.5996
1248	16.8996	20.1495	12.9997	12.3497	15.5996
1249	16.8996	19.4995	12.6747	12.9997	15.2746
1250	16.5746	19.8245	12.9997	12.3497	15.5996
1251	16.2496	19.8245	12.9997	12.9997	15.2746
1252	16.5746	19.4995	12.6747	12.9997	15.9246
1253	16.5746	19.4995	12.9997	12.6747	15.5996
1254	16.5746	19.8245	13.3247	12.3497	15.2746
1255	16.8996	19.4995	13.3247	12.9997	15.5996
1256	16.5746	19.8245	13.6497	12.6747	15.9246
1257	16.8996	19.1745	12.9997	12.0247	15.5996
1258	16.2496	19.1745	12.6747	12.9997	15.9246
1259	16.2496	19.4995	12.9997	12.6747	15.5996
1260	16.2496	19.4995	13.3247	12.3497	15.9246
1261	16.5746	19.4995	12.9997	12.3497	15.9246
1262	16.2496	19.4995	13.6497	12.6747	15.9246
1263	16.5746	19.8245	12.9997	12.6747	15.5996
1264	16.2496	19.4995	12.9997	12.6747	15.5996
1265	16.5746	19.8245	12.9997	12.9997	15.9246
1266	16.5746	19.1745	13.3247	12.3497	15.5996
1267	16.2496	19.1745	13.3247	12.9997	15.2746
1268	16.5746	19.8245	12.6747	12.3497	14.9496
1269	16.2496	19.4995	12.9997	12.6747	16.2496
1270	16.2496	19.4995	12.9997	12.3497	16.2496
1271	16.2496	19.8245	12.9997	12.0247	15.5996
1272	16.2496	19.1745	13.6497	12.9997	16.2496
1273	16.5746	19.4995	13.3247	12.9997	15.5996
1274	16.2496	19.1745	12.6747	12.9997	15.2746
1275	16.2496	19.4995	12.6747	12.6747	15.5996
1276	16.2496	19.1745	12.6747	12.6747	14.9496
1277	16.5746	19.1745	12.9997	12.0247	15.5996
1278	16.5746	19.4995	12.9997	12.6747	15.5996
1279	17.2246	19.4995	12.9997	12.9997	15.2746
1280	16.5746	19.4995	12.9997	12.3497	15.5996
1281	16.5746	19.4995	12.9997	12.3497	14.9496
1282	16.8996	19.4995	13.3247	12.6747	15.9246
1283	16.2496	19.8245	13.3247	12.3497	15.5996
1284	16.2496	19.1745	13.6497	12.6747	15.5996
1285	16.5746	19.8245	13.6497	12.3497	15.5996
1286	16.2496	19.8245	12.9997	12.6747	15.5996
1287	16.2496	19.1745	12.9997	12.3497	15.9246
1288	16.2496	19.8245	13.3247	12.3497	16.2496
1289	16.5746	19.4995	13.3247	12.6747	15.5996
1290	16.5746	19.8245	13.6497	12.6747	16.2496
1291	16.2496	19.8245	13.3247	12.6747	15.9246
1292	16.2496	19.4995	13.3247	12.6747	15.5996
1293	16.5746	19.8245	12.9997	12.9997	15.2746
1294	16.5746	19.4995	13.3247	12.3497	15.9246
1295	15.9246	19.8245	12.9997	12.6747	15.5996
1296	16.5746	19.8245	12.6747	12.6747	15.2746
1297	16.2496	19.8245	12.9997	12.3497	15.9246
1298	16.5746	19.4995	12.6747	12.3497	15.9246
1299	16.2496	19.4995	12.9997	12.6747	16.2496
1300	16.2496	19.4995	12.9997	12.6747	15.9246
1301	16.2496	19.4995	12.9997	12.3497	15.9246
1302	16.5746	19.4995	12.9997	12.3497	15.9246
1303	15.9246	19.1745	12.6747	12.3497	15.5996
1304	16.2496	19.8245	12.6747	12.3497	15.5996
1305	15.9246	19.1745	12.6747	12.3497	15.2746
1306	16.2496	19.1745	13.3247	12.6747	15.9246
1307	15.9246	19.1745	13.3247	12.6747	15.9246
1308	15.9246	19.8245	13.3247	12.6747	15.9246
1309	16.2496	19.1745	12.9997	12.3497	15.9246
1310	16.2496	19.8245	12.9997	12.3497	15.9246
1311	16.2496	19.4995	12.9997	12.6747	15.9246
1312	16.2496	19.8245	12.9997	12.3497	15.9246
1313	16.2496	19.4995	13.3247	12.0247	15.5996
1314	15.9246	19.4995	12.3497	12.3497	15.9246
1315	16.2496	19.8245	13.3247	12.6747	15.9246
1316	16.2496	19.4995	13.3247	12.3497	15.9246
1317	16.2496	19.4995	12.9997	12.0247	15.9246
1318	16.2496	19.4995	12.3497	12.0247	15.5996
1319	16.2496	20.4745	12.9997	12.0247	15.5996
1320	16.2496	19.8245	12.6747	12.3497	15.2746
1321	16.2496	19.8245	12.9997	12.9997	15.5996
1322	16.2496	19.4995	12.6747	12.6747	15.5996
1323	16.2496	19.1745	12.3497	12.3497	15.2746
1324	16.2496	19.4995	12.3497	12.3497	15.2746
1325	16.2496	19.8245	12.6747	12.3497	15.5996
1326	16.2496	19.4995	12.6747	12.9997	15.5996
1327	16.5746	19.4995	12.6747	12.9997	15.2746
1328	16.2496	19.4995	12.6747	12.6747	15.2746
1329	16.2496	19.8245	12.6747	12.3497	15.5996
1330	16.2496	19.8245	12.6747	12.3497	15.9246
1331	15.5996	19.8245	12.6747	12.3497	15.9246
1332	16.2496	19.4995	12.9997	12.0247	15.9246
1333	16.2496	20.1495	12.9997	12.3497	16.5746
1334	16.2496	19.8245	12.9997	12.3497	15.5996
1335	16.2496	19.8245	13.3247	12.3497	15.9246
1336	16.2496	19.4995	12.9997	12.3497	15.9246
1337	16.2496	19.8245	12.9997	12.6747	15.9246
1338	16.2496	19.8245	13.3247	12.3497	15.5996
1339	15.9246	19.4995	13.3247	12.3497	16.2496
1340	16.2496	19.4995	12.6747	12.3497	15.9246
1341	16.2496	19.8245	13.6497	12.6747	15.9246
1342	16.5746	19.1745	12.6747	12.3497	15.9246
1343	16.2496	19.8245	12.6747	12.3497	15.2746
1344	15.5996	19.8245	12.9997	12.3497	16.2496
1345	16.2496	19.1745	12.6747	12.6747	15.9246
1346	16.2496	19.8245	12.6747	12.3497	16.2496
1347	16.5746	19.8245	12.6747	12.3497	15.9246
1348	16.2496	19.8245	12.9997	12.6747	15.9246
1349	15.9246	19.8245	12.9997	12.3497	15.9246
1350	16.5746	19.8245	12.9997	12.6747	16.2496
1351	16.2496	19.4995	12.3497	12.6747	15.9246
1352	16.8996	19.8245	12.6747	12.3497	15.9246
1353	16.2496	19.4995	12.3497	12.6747	15.9246
1354	16.2496	19.4995	12.6747	12.3497	15.9246
1355	16.5746	19.4995	12.3497	12.0247	15.9246
1356	16.2496	19.8245	12.3497	12.6747	15.9246
1357	16.2496	19.4995	12.3497	12.6747	15.5996
1358	16.2496	19.4995	12.6747	12.3497	15.9246
1359	16.2496	19.8245	13.3247	13.3247	15.9246
1360	16.2496	19.4995	12.9997	12.3497	15.9246
1361	16.5746	19.4995	13.3247	12.3497	15.9246
1362	16.2496	19.8245	12.6747	12.6747	16.2496
1363	16.2496	19.4995	13.6497	12.6747	16.2496
1364	16.2496	19.8245	13.9747	12.6747	15.5996
1365	16.5746	19.8245	13.6497	12.3497	16.2496
1366	16.2496	19.4995	13.3247	12.3497	15.9246
1367	16.2496	19.8245	13.9747	12.3497	15.5996
1368	16.2496	19.4995	12.9997	12.6747	16.2496
1369	16.2496	19.1745	12.9997	12.6747	15.9246
1370	15.9246	19.1745	12.9997	12.6747	15.9246
1371	16.5746	19.4995	12.6747	12.6747	15.5996
1372	16.2496	19.8245	12.6747	12.6747	15.5996
1373	16.2496	19.8245	12.3497	12.6747	15.5996
1374	16.2496	19.4995	12.3497	12.6747	15.9246
1375	16.2496	19.4995	12.9997	12.9997	15.5996
1376	16.5746	19.8245	12.9997	12.6747	15.5996
1377	16.5746	19.8245	12.3497	12.6747	15.5996
1378	16.5746	19.4995	12.6747	12.3497	15.5996
1379	15.9246	19.1745	12.0247	12.3497	15.5996
1380	16.2496	19.8245	12.3497	12.3497	15.5996
1381	15.9246	19.8245	12.3497	12.6747	15.2746
1382	15.9246	19.1745	12.6747	12.6747	15.9246
1383	15.9246	19.8245	12.3497	12.6747	15.5996
1384	15.9246	19.8245	12.9997	12.9997	16.2496
1385	15.9246	19.4995	12.3497	12.6747	16.2496
1386	15.9246	19.4995	12.3497	12.6747	15.5996
1387	15.2746	19.4995	12.6747	12.6747	15.5996
1388	16.2496	19.4995	12.6747	12.6747	15.5996
1389	15.9246	19.1745	12.6747	12.6747	15.5996
1390	15.5996	19.8245	12.3497	12.3497	15.9246
1391	15.9246	19.4995	12.9997	12.6747	15.5996
1392	16.2496	19.8245	13.3247	12.6747	15.2746
1393	15.9246	19.4995	12.6747	12.3497	15.5996
1394	15.9246	19.4995	13.3247	12.9997	15.9246
1395	15.5996	19.4995	13.3247	12.9997	15.5996
1396	15.5996	19.4995	12.6747	12.3497	15.5996
1397	15.9246	20.1495	12.9997	12.9997	15.5996
1398	15.5996	19.1745	13.3247	12.9997	15.9246
1399	15.5996	19.4995	12.6747	12.9997	15.5996
1400	15.5996	19.8245	12.6747	12.6747	15.5996
1401	15.9246	19.8245	13.3247	12.6747	15.5996
1402	15.9246	19.4995	12.6747	12.6747	15.5996
1403	15.5996	19.4995	12.6747	12.9997	15.5996
1404	15.9246	19.8245	12.6747	12.6747	15.9246
1405	15.5996	19.1745	12.3497	12.6747	15.5996
1406	15.5996	19.1745	13.3247	12.6747	15.5996
1407	15.5996	19.1745	13.3247	12.3497	15.9246
1408	15.5996	19.4995	13.6497	12.6747	15.2746
1409	15.9246	19.4995	12.9997	12.6747	15.5996
1410	16.2496	19.1745	12.9997	12.3497	14.9496
1411	15.5996	19.4995	12.9997	12.6747	15.2746
1412	15.9246	19.8245	13.3247	12.3497	15.2746
1413	15.9246	19.4995	13.6497	12.6747	15.5996
1414	15.9246	19.8245	13.3247	12.6747	15.9246
1415	15.5996	19.4995	12.9997	12.6747	15.5996
1416	15.9246	19.1745	13.3247	12.6747	15.2746
1417	15.9246	19.4995	12.6747	12.9997	15.5996
1418	15.5996	19.4995	12.6747	12.6747	16.2496
1419	15.9246	19.4995	12.3497	12.6747	14.9496
1420	15.9246	18.8495	12.6747	12.9997	15.2746
1421	15.5996	19.4995	12.9997	12.3497	15.9246
1422	15.9246	19.1745	12.6747	12.6747	16.2496
1423	15.9246	19.8245	13.3247	12.9997	15.9246
1424	15.9246	19.8245	13.6497	12.6747	15.9246
1425	16.2496	19.4995	12.6747	12.9997	15.5996
1426	15.9246	20.1495	12.9997	12.6747	15.2746
1427	15.9246	19.1745	12.9997	12.6747	15.2746
1428	16.2496	19.4995	13.3247	12.6747	15.9246
1429	15.9246	19.4995	13.6497	12.6747	15.2746
1430	15.9246	19.8245	12.9997	12.6747	15.5996
1431	15.9246	19.1745	12.9997	12.6747	14.9496
1432	15.9246	19.4995	13.3247	12.6747	15.2746
1433	15.9246	19.1745	13.9747	12.6747	15.9246
1434	16.2496	18.8495	13.3247	12.6747	15.9246
1435	15.9246	19.4995	13.3247	12.6747	15.2746
1436	16.2496	19.4995	12.6747	12.6747	15.2746
1437	16.2496	19.1745	12.6747	12.6747	15.5996
1438	16.5746	19.8245	12.6747	12.6747	15.2746
1439	15.9246	19.8245	12.6747	12.3497	15.5996
1440	15.5996	19.8245	13.3247	12.6747	15.9246
1441	16.2496	19.4995	12.6747	12.6747	15.5996
1442	16.2496	19.1745	12.6747	12.6747	15.5996
1443	15.9246	19.4995	12.3497	12.6747	14.9496
1444	15.9246	19.8245	12.9997	12.6747	15.2746
1445	15.9246	19.8245	13.3247	12.6747	15.2746
1446	15.9246	19.1745	12.6747	12.6747	14.9496
1447	15.9246	20.1495	12.0247	12.6747	15.5996
1448	15.9246	19.8245	12.9997	12.6747	14.9496
1449	16.2496	19.8245	12.9997	12.3497	15.5996
1450	16.2496	19.8245	12.9997	12.6747	15.2746
1451	16.2496	19.8245	12.6747	12.3497	15.5996
1452	15.9246	19.4995	12.3497	12.6747	15.5996
1453	15.9246	19.8245	13.3247	12.6747	15.9246
1454	15.5996	19.1745	12.6747	12.6747	14.9496
1455	15.5996	19.4995	12.3497	12.3497	15.9246
1456	16.2496	19.8245	12.0247	12.3497	15.2746
1457	15.5996	19.8245	12.3497	12.3497	15.5996
1458	16.2496	19.4995	12.3497	12.3497	15.5996
1459	15.9246	19.8245	12.3497	12.0247	15.2746
1460	16.2496	19.8245	12.3497	12.3497	15.9246
1461	15.9246	19.8245	12.3497	12.0247	15.5996
1462	16.2496	19.4995	12.3497	12.6747	15.5996
1463	16.2496	19.8245	12.6747	12.0247	15.9246
1464	16.2496	19.1745	12.3497	12.0247	15.9246
1465	16.2496	19.4995	12.0247	12.0247	15.9246
1466	15.9246	19.4995	12.0247	12.3497	15.9246
1467	16.2496	19.8245	12.6747	11.6997	15.5996
1468	16.2496	19.4995	12.3497	11.6997	15.5996
1469	15.9246	19.8245	12.3497	12.3497	15.2746
1470	15.9246	19.8245	13.3247	12.0247	15.2746
1471	16.2496	19.4995	12.3497	12.0247	15.2746
1472	16.2496	19.4995	12.9997	12.3497	15.5996
1473	16.2496	19.4995	13.3247	12.6747	15.5996
1474	16.8996	19.4995	13.3247	12.6747	15.2746
1475	16.5746	19.8245	13.6497	12.6747	15.5996
1476	16.5746	19.4995	12.9997	12.3497	15.5996
1477	16.5746	19.8245	13.3247	12.3497	15.9246
1478	16.5746	19.8245	13.6497	12.3497	15.9246
1479	16.5746	19.1745	13.3247	12.3497	15.5996
1480	16.2496	19.1745	13.6497	12.0247	15.9246
1481	16.5746	19.1745	12.9997	12.0247	15.5996
1482	16.5746	19.4995	13.9747	12.0247	15.2746
1483	16.5746	19.4995	13.6497	12.3497	15.5996
1484	16.5746	19.4995	13.6497	12.3497	14.9496
1485	16.2496	19.4995	12.9997	12.3497	15.9246
1486	16.5746	19.4995	13.3247	12.9997	15.9246
1487	16.5746	19.8245	13.3247	12.3497	15.5996
1488	16.2496	19.8245	12.9997	12.3497	15.9246
1489	16.5746	20.1495	13.3247	12.6747	15.5996
1490	16.2496	19.8245	13.6497	12.3497	15.2746
1491	16.2496	20.1495	13.3247	12.6747	15.5996
1492	16.5746	19.8245	13.3247	12.9997	15.5996
1493	16.5746	19.8245	13.3247	12.3497	15.5996
1494	16.5746	20.1495	12.9997	12.6747	15.9246
1495	16.5746	19.8245	13.3247	12.6747	15.5996
1496	16.5746	19.4995	12.9997	12.6747	15.5996
1497	16.5746	19.8245	12.9997	12.6747	15.2746
1498	16.5746	19.8245	13.3247	12.9997	15.9246
1499	16.2496	19.8245	12.9997	12.3497	15.5996
1500	16.5746	19.4995	12.9997	12.3497	15.5996
1501	16.2496	19.8245	12.9997	12.0247	15.2746
1502	16.5746	19.8245	12.9997	12.3497	15.5996
1503	16.8996	19.4995	13.6497	12.3497	15.9246
1504	16.2496	19.8245	12.6747	12.6747	15.5996
1505	16.5746	20.1495	12.9997	12.3497	15.9246
1506	16.5746	20.1495	12.9997	11.6997	15.2746
1507	16.5746	20.1495	12.9997	12.6747	15.5996
1508	16.5746	19.8245	13.3247	12.6747	15.2746
1509	16.5746	20.7995	13.3247	12.6747	15.2746
1510	16.2496	20.1495	13.3247	12.3497	15.5996
1511	16.5746	20.1495	13.6497	12.3497	15.9246
1512	15.9246	20.1495	13.3247	12.6747	15.2746
1513	16.2496	20.1495	13.3247	12.6747	15.2746
1514	16.2496	20.4745	12.9997	12.3497	15.9246
1515	15.9246	20.1495	12.9997	12.6747	15.2746
1516	16.5746	20.1495	12.3497	12.6747	15.5996
1517	16.2496	19.8245	12.0247	12.3497	15.5996
1518	16.2496	19.8245	12.0247	12.6747	15.5996
1519	16.2496	19.8245	11.6997	12.6747	15.5996
1520	16.5746	20.1495	11.6997	12.3497	15.5996
1521	16.5746	20.1495	12.3497	12.6747	15.5996
1522	16.2496	19.8245	12.0247	12.6747	15.9246
1523	16.5746	20.1495	12.3497	12.3497	15.9246
1524	15.9246	20.1495	12.6747	12.3497	15.5996
1525	16.2496	20.4745	12.3497	12.6747	15.2746
1526	15.5996	19.1745	12.9997	12.0247	15.2746
1527	16.2496	19.8245	12.9997	12.3497	15.5996
1528	15.9246	19.4995	13.3247	12.6747	15.5996
1529	15.5996	19.8245	12.3497	12.3497	15.5996
1530	15.9246	19.4995	12.9997	12.3497	15.9246
1531	15.9246	20.1495	13.6497	12.6747	15.5996
1532	15.9246	19.8245	13.3247	12.6747	15.5996
1533	15.9246	19.8245	13.3247	12.6747	15.9246
1534	15.9246	19.4995	12.6747	12.6747	15.9246
1535	16.2496	19.8245	12.6747	12.9997	15.5996
1536	16.2496	19.8245	12.9997	12.3497	15.9246
1537	16.5746	19.4995	12.9997	12.9997	15.9246
1538	15.9246	19.8245	12.9997	12.6747	15.5996
1539	16.2496	19.8245	12.9997	12.6747	16.2496
1540	16.2496	19.1745	12.9997	12.9997	15.9246
1541	16.2496	19.8245	12.3497	12.9997	16.2496
1542	16.2496	19.8245	12.9997	12.9997	15.5996
1543	16.2496	19.8245	12.9997	12.6747	15.5996
1544	16.5746	19.8245	12.6747	12.6747	15.5996
1545	16.2496	19.1745	12.9997	12.6747	15.9246
1546	16.5746	19.4995	12.9997	12.6747	15.5996
1547	16.8996	19.4995	12.6747	12.6747	15.5996
1548	16.5746	19.4995	12.6747	12.9997	15.9246
1549	16.5746	19.8245	12.9997	12.9997	15.5996
1550	16.5746	19.4995	12.6747	12.6747	15.5996
1551	16.5746	19.4995	13.3247	12.6747	15.9246
1552	16.2496	19.4995	12.9997	12.6747	15.5996
1553	16.2496	19.4995	13.6497	13.3247	15.5996
1554	16.2496	19.4995	13.3247	12.6747	15.5996
1555	15.9246	19.4995	13.6497	12.6747	15.9246
1556	15.9246	19.8245	13.3247	12.9997	15.9246
1557	16.2496	19.8245	12.9997	12.9997	15.9246
1558	16.5746	19.8245	12.3497	12.6747	15.5996
1559	16.2496	19.4995	12.3497	12.6747	15.9246
1560	16.2496	19.8245	12.6747	12.6747	15.9246
1561	16.2496	19.8245	12.3497	12.6747	15.9246
1562	16.5746	20.1495	12.6747	12.6747	15.5996
1563	16.2496	20.1495	12.9997	12.6747	15.9246
1564	16.5746	19.8245	12.9997	12.3497	15.5996
1565	16.2496	19.4995	13.3247	12.6747	15.5996
1566	16.5746	20.4745	12.9997	12.0247	15.5996
1567	16.5746	20.1495	13.3247	12.3497	15.9246
1568	16.5746	19.4995	12.6747	12.3497	15.5996
1569	16.5746	19.8245	12.6747	12.6747	15.5996
1570	16.8996	20.1495	12.6747	12.3497	15.5996
1571	16.8996	19.8245	12.9997	12.3497	15.5996
1572	16.2496	19.8245	12.9997	12.6747	15.5996
1573	16.8996	19.8245	13.3247	12.6747	15.2746
1574	16.2496	19.4995	12.9997	12.6747	15.5996
1575	16.2496	19.1745	12.6747	12.6747	15.5996
1576	16.5746	19.4995	12.3497	12.6747	15.9246
1577	16.2496	19.8245	12.6747	12.3497	15.5996
1578	16.5746	19.1745	12.6747	12.0247	16.2496
1579	16.2496	20.1495	12.9997	12.6747	15.2746
1580	16.2496	19.4995	12.0247	12.6747	15.5996
1581	16.2496	19.8245	13.3247	12.6747	15.5996
1582	16.2496	19.4995	12.3497	12.6747	15.9246
1583	16.2496	19.4995	12.6747	12.0247	15.9246
1584	16.5746	19.8245	12.9997	12.3497	15.5996
1585	16.5746	20.1495	12.9997	12.6747	15.5996
1586	16.8996	19.8245	12.6747	12.6747	15.5996
1587	16.5746	20.4745	13.3247	12.6747	15.5996
1588	16.5746	19.4995	13.3247	12.6747	15.9246
1589	17.5496	19.4995	12.9997	12.6747	15.5996
1590	16.5746	19.4995	12.9997	12.9997	15.9246
1591	17.5496	19.8245	12.9997	13.3247	15.5996
1592	16.8996	20.1495	12.9997	12.9997	15.9246
1593	16.5746	20.1495	12.9997	12.9997	15.9246
1594	16.5746	19.8245	12.9997	12.9997	15.9246
1595	16.5746	19.8245	12.6747	12.9997	15.2746
1596	16.5746	19.4995	13.3247	13.3247	16.2496
1597	16.5746	19.4995	12.9997	13.3247	15.9246
1598	16.2496	19.8245	12.6747	13.3247	14.9496
1599	16.5746	19.8245	12.0247	13.3247	15.9246
1600	16.5746	20.1495	12.3497	13.3247	16.2496
1601	16.2496	19.1745	12.6747	13.3247	15.5996
1602	16.2496	19.8245	12.9997	12.9997	15.9246
1603	16.2496	20.1495	12.3497	12.9997	15.5996
1604	16.2496	19.4995	12.0247	13.3247	15.9246
1605	16.2496	19.8245	12.0247	12.6747	15.5996
1606	16.2496	19.8245	12.9997	12.9997	15.2746
1607	16.2496	19.8245	12.9997	12.3497	15.2746
1608	16.5746	19.1745	13.6497	13.3247	15.5996
1609	16.2496	19.4995	12.9997	13.3247	15.2746
1610	16.5746	19.8245	13.3247	12.9997	15.9246
1611	16.2496	19.4995	13.3247	12.9997	15.5996
1612	16.2496	19.8245	12.6747	12.9997	15.5996
1613	16.2496	19.8245	12.6747	12.9997	15.5996
1614	15.9246	19.8245	12.9997	12.9997	15.9246
1615	16.2496	19.1745	12.6747	12.9997	15.5996
1616	16.2496	19.4995	12.6747	12.9997	15.5996
1617	15.9246	19.4995	12.0247	13.3247	15.5996
1618	15.9246	19.8245	12.3497	13.6497	15.9246
1619	16.2496	19.8245	12.6747	13.6497	15.5996
1620	16.5746	19.4995	12.3497	13.6497	15.5996
1621	15.9246	19.4995	12.6747	13.6497	15.9246
1622	16.8996	19.4995	12.6747	13.3247	15.5996
1623	16.5746	19.1745	13.3247	13.3247	15.9246
1624	16.2496	19.4995	13.3247	13.3247	15.9246
1625	15.9246	19.8245	13.3247	12.9997	15.9246
1626	16.2496	19.4995	12.9997	13.3247	15.5996
1627	16.2496	19.4995	13.3247	13.3247	15.9246
1628	16.2496	19.4995	13.6497	13.3247	15.5996
1629	16.5746	19.4995	13.9747	12.9997	15.9246
1630	16.5746	19.8245	13.3247	12.9997	15.5996
1631	16.2496	19.8245	13.6497	12.9997	15.5996
1632	16.2496	20.1495	13.6497	12.9997	15.5996
1633	16.2496	19.8245	12.9997	12.9997	15.9246
1634	16.5746	19.4995	12.9997	13.3247	15.5996
1635	16.2496	19.1745	13.3247	13.3247	15.2746
1636	16.2496	20.1495	12.9997	12.9997	15.5996
1637	16.2496	19.8245	13.3247	13.3247	15.5996
1638	16.5746	19.4995	12.9997	13.3247	15.5996
1639	16.5746	19.4995	13.3247	12.9997	15.9246
1640	16.5746	20.1495	13.6497	12.9997	15.9246
1641	16.2496	19.8245	13.9747	13.3247	15.9246
1642	16.5746	19.4995	13.6497	13.3247	15.9246
1643	16.5746	19.8245	13.9747	12.9997	15.5996
1644	16.2496	19.4995	13.9747	12.9997	15.9246
1645	16.5746	20.1495	13.6497	13.3247	15.5996
1646	16.2496	19.4995	13.6497	12.9997	15.5996
1647	16.2496	19.8245	12.6747	12.9997	15.5996
1648	16.5746	19.8245	13.3247	13.3247	15.5996
1649	16.2496	19.8245	13.6497	13.3247	15.2746
1650	16.2496	19.4995	13.3247	12.6747	15.9246
1651	16.5746	19.4995	13.6497	12.9997	15.5996
1652	16.2496	19.4995	13.6497	12.9997	15.5996
1653	16.5746	19.8245	12.9997	13.3247	15.5996
1654	16.2496	19.8245	13.9747	13.6497	15.9246
1655	16.5746	19.4995	13.3247	13.3247	15.9246
1656	16.5746	19.1745	13.3247	12.9997	15.5996
1657	16.8996	19.4995	13.3247	12.9997	15.5996
1658	16.5746	20.1495	12.6747	13.3247	15.2746
1659	16.5746	19.1745	12.6747	12.6747	15.2746
1660	16.5746	19.8245	13.6497	12.9997	15.2746
1661	16.5746	19.4995	13.6497	13.6497	15.5996
1662	16.8996	19.8245	13.9747	13.3247	15.2746
1663	16.5746	19.8245	13.9747	12.9997	15.5996
1664	16.2496	19.4995	13.6497	13.3247	15.2746
1665	16.5746	19.4995	13.3247	13.3247	15.5996
1666	16.5746	19.4995	13.3247	12.9997	15.2746
1667	17.2246	19.4995	13.3247	12.9997	15.2746
1668	16.8996	19.4995	13.3247	12.9997	15.5996
1669	16.5746	19.4995	12.9997	12.6747	15.2746
1670	16.5746	19.4995	12.6747	13.3247	14.9496
1671	17.8746	20.1495	12.9997	12.9997	15.5996
1672	16.5746	19.8245	13.3247	12.9997	15.5996
1673	16.2496	19.4995	13.3247	13.3247	15.2746
1674	16.8996	19.4995	13.3247	13.6497	14.9496
1675	16.5746	20.1495	12.9997	13.3247	14.9496
1676	16.5746	19.1745	12.9997	12.9997	15.5996
1677	16.5746	19.4995	13.3247	13.3247	15.2746
1678	16.5746	19.8245	13.3247	12.9997	15.2746
1679	16.5746	19.8245	12.9997	13.3247	15.5996
1680	16.5746	19.8245	13.9747	12.9997	15.5996
1681	16.2496	19.4995	12.9997	12.6747	15.5996
1682	16.2496	18.8495	13.3247	12.6747	15.5996
1683	15.9246	19.8245	13.6497	12.9997	15.2746
1684	15.9246	19.4995	12.9997	13.3247	15.2746
1685	16.2496	19.4995	12.6747	12.6747	15.2746
1686	15.9246	19.4995	12.3497	12.9997	15.2746
1687	16.2496	19.8245	13.3247	13.3247	15.2746
1688	15.9246	19.4995	12.9997	12.9997	15.9246
1689	15.9246	19.8245	12.6747	12.9997	15.5996
1690	16.5746	19.1745	12.9997	13.3247	15.5996
1691	16.2496	19.8245	13.3247	13.3247	15.5996
1692	15.9246	19.4995	12.9997	13.3247	15.2746
1693	15.9246	20.1495	13.3247	13.3247	15.2746
1694	15.9246	19.4995	13.3247	13.3247	15.2746
1695	15.9246	19.8245	13.3247	12.9997	15.2746
1696	15.9246	19.8245	12.9997	13.6497	15.9246
1697	15.9246	19.4995	13.3247	13.6497	15.2746
1698	15.5996	19.8245	12.9997	13.9747	15.5996
1699	15.5996	20.1495	12.9997	13.3247	15.5996
1700	15.5996	19.8245	12.9997	13.3247	15.5996
1701	15.2746	19.8245	12.9997	13.3247	15.5996
1702	15.5996	19.4995	13.3247	13.3247	15.5996
1703	16.2496	19.1745	12.9997	13.3247	15.5996
1704	15.9246	19.8245	12.6747	12.9997	15.2746
1705	15.9246	20.1495	12.6747	13.3247	15.5996
1706	16.2496	19.1745	12.9997	13.3247	15.2746
1707	16.2496	19.4995	12.9997	13.6497	15.2746
1708	15.9246	20.1495	13.3247	13.3247	15.2746
1709	16.2496	19.8245	13.3247	12.9997	15.2746
1710	16.2496	19.4995	12.6747	12.3497	14.9496
1711	16.2496	19.8245	12.9997	12.9997	15.2746
1712	16.2496	19.8245	12.9997	13.3247	15.2746
1713	16.8996	20.1495	12.9997	12.9997	15.2746
1714	16.5746	20.1495	12.6747	13.3247	15.5996
1715	16.2496	19.8245	12.6747	13.6497	15.2746
1716	16.8996	19.8245	13.3247	13.9747	15.5996
1717	16.8996	19.8245	12.6747	13.3247	15.2746
1718	16.5746	20.1495	12.3497	13.3247	15.2746
1719	16.8996	19.8245	12.0247	13.3247	15.2746
1720	16.5746	19.8245	12.9997	13.3247	15.5996
1721	17.2246	19.4995	12.0247	13.6497	15.2746
1722	16.2496	20.1495	12.6747	13.6497	15.5996
1723	16.8996	19.8245	12.3497	13.3247	15.2746
1724	17.2246	19.4995	12.6747	12.9997	15.5996
1725	17.2246	19.8245	11.6997	13.3247	15.5996
1726	16.5746	19.4995	11.6997	12.9997	15.5996
1727	17.5496	19.8245	12.0247	12.9997	15.2746
1728	17.2246	19.8245	12.3497	12.9997	15.5996
1729	16.2496	20.1495	12.3497	13.3247	15.9246
1730	16.5746	19.8245	12.6747	12.6747	15.5996
1731	16.5746	20.1495	12.0247	12.3497	15.5996
1732	16.5746	20.1495	12.3497	12.3497	15.2746
1733	15.9246	19.8245	12.6747	12.9997	15.5996
1734	16.2496	19.8245	12.3497	12.9997	15.5996
1735	16.2496	19.4995	12.3497	12.9997	15.2746
1736	16.2496	19.4995	12.0247	12.6747	15.2746
1737	15.9246	19.4995	12.9997	12.3497	15.2746
1738	16.5746	19.4995	12.6747	12.3497	14.9496
1739	16.2496	19.8245	13.3247	12.6747	15.5996
1740	15.9246	19.4995	13.3247	12.6747	14.9496
1741	16.2496	19.4995	12.9997	12.6747	15.5996
1742	16.2496	19.4995	12.6747	12.9997	14.9496
1743	16.2496	19.8245	12.6747	12.9997	15.5996
1744	16.2496	19.4995	12.6747	12.3497	14.9496
1745	16.2496	19.4995	12.6747	12.6747	15.2746
1746	16.5746	19.4995	12.6747	12.3497	15.5996
1747	16.5746	18.8495	12.6747	12.3497	15.9246
1748	16.2496	19.8245	12.6747	12.0247	15.5996
1749	16.5746	19.1745	12.9997	12.9997	15.2746
1750	16.2496	19.8245	12.9997	12.0247	14.9496
1751	16.5746	19.1745	12.6747	12.3497	15.5996
1752	16.5746	19.1745	12.9997	12.0247	15.2746
1753	17.2246	19.4995	12.6747	12.9997	15.9246
1754	16.8996	19.4995	12.9997	12.6747	15.9246
1755	17.2246	19.8245	12.6747	12.3497	15.9246
1756	16.8996	19.4995	12.3497	12.9997	15.2746
1757	16.8996	19.4995	12.3497	12.6747	15.5996
1758	16.5746	19.4995	12.6747	12.9997	16.2496
1759	16.8996	19.1745	12.3497	13.3247	16.2496
1760	16.8996	19.8245	12.6747	12.9997	15.2746
1761	16.8996	19.8245	12.9997	12.9997	15.5996
1762	17.2246	19.8245	12.9997	12.6747	15.2746
1763	17.5496	19.8245	12.9997	12.9997	15.9246
1764	17.2246	19.4995	12.9997	13.6497	15.5996
1765	16.5746	19.1745	12.9997	13.3247	15.9246
1766	16.8996	19.4995	12.3497	12.9997	15.9246
1767	16.8996	19.8245	12.3497	12.6747	15.5996
1768	16.8996	19.4995	12.6747	12.9997	15.5996
1769	17.2246	19.1745	12.6747	12.3497	15.5996
1770	17.2246	19.4995	12.3497	12.3497	15.5996
1771	17.8746	19.4995	12.3497	12.6747	15.9246
1772	17.2246	19.4995	12.0247	12.6747	14.9496
1773	17.2246	19.4995	12.0247	13.6497	15.2746
1774	17.2246	19.8245	12.6747	13.3247	15.5996
1775	17.5496	18.8495	12.6747	12.9997	14.9496
1776	18.5245	19.4995	12.3497	13.3247	15.9246
1777	17.2246	19.8245	11.6997	12.6747	15.5996
1778	17.8746	19.8245	12.3497	12.9997	15.5996
1779	16.8996	19.8245	12.3497	12.9997	15.2746
1780	17.8746	19.4995	12.0247	12.9997	14.9496
1781	17.8746	19.4995	12.0247	12.6747	15.9246
1782	17.8746	19.4995	12.3497	13.3247	15.2746
1783	17.5496	20.1495	12.6747	12.6747	15.5996
1784	17.8746	19.8245	12.3497	12.9997	15.2746
1785	17.8746	19.8245	12.6747	12.3497	15.5996
1786	17.2246	19.8245	12.9997	12.9997	14.9496
1787	17.5496	19.4995	12.3497	12.6747	15.5996
1788	16.8996	19.8245	12.9997	12.3497	15.2746
1789	16.8996	19.1745	12.3497	13.3247	15.2746
1790	16.8996	19.8245	12.3497	12.9997	14.9496
1791	17.2246	19.8245	12.3497	12.6747	14.9496
1792	17.2246	19.8245	12.6747	12.6747	15.2746
1793	17.8746	19.4995	12.3497	12.6747	14.9496
1794	17.2246	19.4995	12.6747	12.9997	15.5996
1795	16.8996	19.8245	12.3497	13.3247	15.5996
1796	17.2246	19.8245	12.3497	12.6747	15.5996
1797	17.8746	19.8245	12.3497	12.6747	15.2746
1798	17.5496	19.8245	12.0247	12.6747	15.5996
1799	17.5496	19.4995	12.0247	12.3497	15.9246

## Sheet: 20Hz
Stimulation
Time (s)	BGBV-075_0000	BGBV-106_0000	BGBV-117_0000	BGBV-134_0000	BGBV-253_0000	BGBV-333_0000	BGBV-334_0000	BGBV-355_0000	BGBV-407_0000	BGBV-417_0000
0	12.35	18.8499	21.0166	24.3744	16.5746			26.9743	24.0494	19.4995
1	12.5666	18.8499	21.2333	24.0494	16.5746	24.0494	21.1245	26.6493	24.3744	19.4995
2	12.7833	18.6333	21.2333	24.0494	16.5746	23.0744	21.1245	26.9743	24.0494	19.4995
3	12.7833	19.0666	21.2333	24.0494	16.2496	23.0744	21.1245	27.2993	24.0494	19.4995
4	12.7833	19.0666	21.2333	24.0494	16.2496	23.3994	21.1245	27.2993	24.3744	19.4995
5	12.7833	18.8499	21.4499	24.0494	16.2496	23.3994	21.1245	26.6493	24.3744	19.4995
6	12.5666	18.6333	21.2333	24.0494	16.2496	22.7494	21.7745	26.6493	24.0494	19.4995
7	12.7833	18.8499	21.4499	24.0494	16.5746	23.0744	21.4495	26.6493	24.3744	19.4995
8	12.5666	18.8499	21.2333	24.0494	16.2496	22.7494	21.1245	26.9743	24.0494	19.4995
9	12.5666	18.8499	21.4499	24.0494	15.9246	23.0744	21.4495	26.6493	24.0494	19.1745
10	12.7833	18.6333	21.2333	24.0494	16.2496	23.0744	21.4495	27.2993	24.3744	19.1745
11	12.35	18.8499	21.2333	24.0494	16.2496	23.3994	21.1245	26.6493	24.0494	19.4995
12	12.5666	18.8499	21.2333	24.0494	16.2496	23.0744	21.1245	26.9743	24.3744	19.1745
13	12.5666	19.0666	21.4499	24.0494	16.2496	23.0744	20.7995	26.9743	24.0494	19.1745
14	12.5666	18.8499	21.2333	24.0494	15.9246	23.0744	21.4495	26.6493	24.0494	19.4995
15	12.5666	19.0666	21.2333	24.0494	16.2496	22.7494	21.7745	26.6493	24.0494	19.4995
16	12.7833	18.8499	21.2333	23.7244	16.5746	23.0744	21.7745	26.6493	24.3744	19.1745
17	12.35	18.8499	21.2333	24.0494	16.5746	22.7494	21.4495	26.6493	23.7244	19.4995
18	12.5666	18.6333	21.2333	24.0494	16.5746	22.7494	21.1245	27.2993	23.3994	19.4995
19	12.5666	18.6333	21.2333	24.0494	16.5746	23.3994	21.4495	26.6493	24.0494	19.8245
20	12.7833	19.0666	21.4499	24.0494	16.5746	22.7494	22.0994	26.6493	23.7244	19.1745
21	12.5666	18.6333	21.2333	24.0494	15.9246	23.0744	21.4495	26.9743	24.0494	19.4995
22	12.35	18.6333	21.2333	24.0494	16.2496	23.3994	21.4495	26.9743	24.0494	19.4995
23	12.7833	18.8499	21.4499	24.0494	16.2496	23.0744	21.4495	26.3243	24.3744	19.4995
24	12.5666	18.8499	21.2333	24.0494	16.2496	22.7494	21.7745	27.2993	23.7244	19.4995
25	12.5666	18.6333	21.4499	24.0494	16.2496	23.0744	21.4495	27.2993	24.3744	19.4995
26	12.35	18.6333	21.4499	24.0494	16.5746	23.0744	21.4495	26.6493	24.0494	19.4995
27	12.7833	18.6333	21.2333	24.3744	16.2496	23.0744	21.1245	27.2993	23.7244	19.4995
28	12.35	18.6333	21.2333	24.0494	16.2496	23.0744	21.4495	26.6493	23.7244	19.4995
29	12.35	18.8499	21.4499	24.0494	15.9246	23.0744	21.4495	26.9743	24.0494	19.4995
30	12.7833	18.8499	21.2333	24.0494	16.2496	22.7494	21.1245	26.9743	24.0494	19.4995
31					16.2496			26.9743	23.7244	19.4995
32					15.9246			26.9743	23.7244	19.4995
33					16.2496			27.2993	23.7244	19.1745
34					16.2496			26.9743	23.7244	19.4995
35					16.2496			26.9743	24.3744	19.4995
36					16.5746			27.2993	23.7244	19.4995
37					16.5746			27.2993	23.7244	19.4995
38					16.8996			27.2993	23.7244	19.4995
39					16.5746			27.2993	23.7244	19.4995
40					16.8996			27.2993	24.0494	19.4995
41	12.7833	18.6333	21.2333	24.0494	16.5746	23.3994	21.7745	26.9743	24.0494	19.4995
42	12.35	18.8499	21.4499	24.0494	16.5746	22.7494	20.4745	26.9743	23.3994	19.8245
43	12.5666	18.8499	21.2333	24.0494	16.5746	22.7494	21.1245	26.9743	24.0494	19.1745
44	12.1333	18.8499	21.2333	24.0494	16.8996	22.7494	21.7745	26.6493	23.7244	19.8245
45	12.35	18.6333	21.2333	24.0494	16.8996	23.0744	21.4495	27.2993	23.7244	19.8245
46	12.5666	18.8499	21.2333	24.0494	16.8996	22.7494	20.7995	27.2993	23.7244	19.4995
47	12.5666	18.8499	21.2333	24.0494	16.5746	23.3994	21.4495	26.9743	23.7244	19.8245
48	12.7833	18.6333	21.2333	24.0494	16.5746	23.0744	21.1245	27.2993	23.7244	19.4995
49	12.5666	18.6333	21.2333	24.0494	16.8996	22.7494	20.7995	26.9743	23.7244	19.4995
50	12.5666	18.6333	21.2333	24.0494	16.5746	23.0744	21.1245	26.9743	24.0494	19.8245
51	12.35	18.6333	21.2333	24.0494	16.5746	23.3994	21.1245	27.2993	24.0494	19.8245
[truncated: 1,748 more rows]
