# Supplementary material for: Elevated pyramidal cell firing orchestrates arteriolar vasoconstriction through COX-2-derived prostaglandin E2 signaling
Source: eLife. 2025 Apr 23;13:RP102424. doi: 10.7554/eLife.102424 (PMC12017770; doi:10.7554/eLife.102424)
Supplement: Figure 2—figure supplement 1—source data 1. [file elife-102424-fig2-figsupp1-data1.xls]

## Sheet: 2 Hz
	2 Hz
Temps (s)	BG-145	BG-149	BG-151	BG-153	BG-154	BG-155	BG-156	BG-157	BG-161	Mean	s,e,m,	sem+	sem-
0.5	0	0	0	0	0	0	0	0	0	0	0	0	0
1.5	0	0	0	0	0	0	0	0	0	0	0	0	0
2.5	0	0	0	0	0	0	0	0	0	0	0	0	0
3.5	0	0	0	0	0	0	0	0	0	0	0	0	0
4.5	0	0	0	0	0	0	0	0	0	0	0	0	0
5.5	0	0	0	0	0	0	0	0	0	0	0	0	0
6.5	0	0	0	0	0	0	0	0	0	0	0	0	0
7.5	0	0	0	0	0	0	0	0	0	0	0	0	0
8.5	0	0	0	0	0	0	0	0	0	0	0	0	0
9.5	0	0	0	0	0	0	0	0	0	0	0	0	0
10.5	0	0	0	0	0	0	0	0	0	0	0	0	0
11.5	0	0	0	0	0	0	0	0	0	0	0	0	0
12.5	0	0	0	0	0	0	0	0	0	0	0	0	0
13.5	0	0	0	0	0	0	0	0	0	0	0	0	0
14.5	0	0	0	0	0	0	0	0	0	0	0	0	0
15.5	0	0	0	0	0	0	0	0	0	0	0	0	0
16.5	0	0	0	0	0	0	0	0	0	0	0	0	0
17.5	0	0	0	0	0	0	0	0	0	0	0	0	0
18.5	0	0	0	0	0	0	0	0	0	0	0	0	0
19.5	0	0	0	0	0	0	0	0	0	0	0	0	0
20.5	0	0	0	0	0	0	0	0	0	0	0	0	0
21.5	0	0	0	0	0	0	0	0	0	0	0	0	0
22.5	0	0	0	0	0	0	0	0	0	0	0	0	0
23.5	0	0	0	0	0	0	0	0	0	0	0	0	0
24.5	0	0	0	0	0	0	0	0	0	0	0	0	0
25.5	0	0	0	0	0	0	0	0	0	0	0	0	0
26.5	0	0	0	0	0	0	0	0	0	0	0	0	0
27.5	0	0	0	0	0	0	0	0	0	0	0	0	0
28.5	0	0	0	0	0	0	0	0	0	0	0	0	0
29.5	0	0	0	0	0	0	0	0	0	0	0	0	0
30.5	1	4	1	1	1	1	1	1	2	1.44444	0.35843	1.80287	1.08601
31.5	2	5	2	2	2	2	2	2	2	2.33333	0.353553	2.68689	1.97978
32.5	2	2	2	2	2	2	2	2	2	2	0	2	2
33.5	2	2	2	2	2	2	2	2	2	2	0	2	2
34.5	2	2	2	2	2	2	2	2	2	2	0	2	2
35.5	2	2	2	2	2	2	2	2	2	2	0	2	2
36.5	2	2	2	2	2	2	2	2	2	2	0	2	2
37.5	2	2	2	2	2	2	2	2	2	2	0	2	2
38.5	2	2	2	2	2	2	2	2	2	2	0	2	2
39.5	2	2	2	2	2	2	2	2	2	2	0	2	2
40.5	0	0	0	0	0	0	0	0	0	0	0	0	0
41.5	0	0	0	0	0	0	0	0	0	0	0	0	0
42.5	0	0	0	0	0	0	0	0	0	0	0	0	0
43.5	0	0	0	0	0	0	0	0	0	0	0	0	0
44.5	0	0	0	0	0	0	0	0	0	0	0	0	0
45.5	0	0	0	0	0	0	0	0	0	0	0	0	0
46.5	0	0	0	0	0	0	0	0	0	0	0	0	0
47.5	0	0	0	0	0	0	0	0	0	0	0	0	0
48.5	0	0	0	0	0	0	0	0	0	0	0	0	0
49.5	0	0	0	0	0	0	0	0	0	0	0	0	0
50.5	0	0	0	0	0	0	0	0	0	0	0	0	0
51.5	0	0	0	0	0	0	0	0	0	0	0	0	0
52.5	0	0	0	0	0	0	0	0	0	0	0	0	0
53.5	0	0	0	0	0	0	0	0	0	0	0	0	0
54.5	0	0	0	0	0	0	0	0	0	0	0	0	0
55.5	0	0	0	0	0	0	0	0	0	0	0	0	0
56.5	0	0	0	0	0	0	0	0	0	0	0	0	0
57.5	0	0	0	0	0	0	0	0	0	0	0	0	0
58.5	0	0	0	0	0	0	0	0	0	0	0	0	0
59.5	0	0	0	0	0	0	0	0	0	0	0	0	0
60.5	0	0	0	0	0	0	0	0	0	0	0	0	0
61.5	0	0	0	0	0	0	0	0	0	0	0	0	0
62.5	0	0	0	0	0	0	0	0	0	0	0	0	0
63.5	0	0	0	0	0	0	0	0	0	0	0	0	0
64.5	0	0	0	0	0	0	0	0	0	0	0	0	0
65.5	0	0	0	0	0	0	0	0	0	0	0	0	0
66.5	0	0	0	0	0	0	0	0	0	0	0	0	0
67.5	0	0	0	0	0	0	0	0	0	0	0	0	0
68.5	0	0	0	0	0	0	0	0	0	0	0	0	0
69.5	0	0	0	0	0	0	0	0	0	0	0	0	0
70.5	0	0	0	0	0	0	0	0	0	0	0	0	0
71.5	0	0	0	0	0	0	0	0	0	0	0	0	0
72.5	0	0	0	0	0	0	0	0	0	0	0	0	0
73.5	0	0	0	0	0	0	0	0	0	0	0	0	0
74.5	0	0	0	0	0	0	0	0	0	0	0	0	0
75.5	0	0	0	0	0	0	0	0	0	0	0	0	0
76.5	0	0	0	0	0	0	0	0	0	0	0	0	0
77.5	0	0	0	0	0	0	0	0	0	0	0	0	0
78.5	0	0	0	0	0	0	0	0	0	0	0	0	0
79.5	0	0	0	0	0	0	0	0	0	0	0	0	0
80.5	0	0	0	0	0	0	0	0	0	0	0	0	0
81.5	0	0	0	0	0	0	0	0	0	0	0	0	0
82.5	0	0	0	0	0	0	0	0	0	0	0	0	0
83.5	0	0	0	0	0	0	0	0	0	0	0	0	0
84.5	0	0	0	0	0	0	0	0	0	0	0	0	0
85.5	0	0	0	0	0	0	0	0	0	0	0	0	0
86.5	0	0	0	0	0	0	0	0	0	0	0	0	0
87.5	0	0	0	0	0	0	0	0	0	0	0	0	0
88.5	0	0	0	0	0	0	0	0	0	0	0	0	0
89.5	0	0	0	0	0	0	0	0	0	0	0	0	0
90.5	0	0	0	0	0	0	0	0	0	0	0	0	0
91.5	0	0	0	0	0	0	0	0	0	0	0	0	0
92.5	0	0	0	0	0	0	0	0	0	0	0	0	0
93.5	0	0	0	0	0	0	0	0	0	0	0	0	0
94.5	0	0	0	0	0	0	0	0	0	0	0	0	0
95.5	0	0	0	0	0	0	0	0	0	0	0	0	0
96.5	0	0	0	0	0	0	0	0	0	0	0	0	0
97.5	0	0	0	0	0	0	0	0	0	0	0	0	0
98.5	0	0	0	0	0	0	0	0	0	0	0	0	0
99.5	0	0	0	0	0	0	0	0	0	0	0	0	0
100.5	0	0	0	0	0	0	0	0	0	0	0	0	0
101.5	0	0	0	0	0	0	0	0	0	0	0	0	0
102.5	0	0	0	0	0	0	0	0	0	0	0	0	0
103.5	0	0	0	0	0	0	0	0	0	0	0	0	0
104.5	0	0	0	0	0	0	0	0	0	0	0	0	0
105.5	0	0	0	0	0	0	0	0	0	0	0	0	0
106.5	0	0	0	0	0	0	0	0	0	0	0	0	0
107.5	0	0	0	0	0	0	0	0	0	0	0	0	0
108.5	0	0	0	0	0	0	0	0	0	0	0	0	0
109.5	0	0	0	0	0	0	0	0	0	0	0	0	0
110.5	0	0	0	0	0	0	0	0	0	0	0	0	0
111.5	0	0	0	0	0	0	0	0	0	0	0	0	0
112.5	0	0	0	0	0	0	0	0	0	0	0	0	0
113.5	0	0	0	0	0	0	0	0	0	0	0	0	0
114.5	0	0	0	0	0	0	0	0	0	0	0	0	0
115.5	0	0	0	0	0	0	0	0	0	0	0	0	0
116.5	0	0	0	0	0	0	0	0	0	0	0	0	0
117.5	0	0	0	0	0	0	0	0	0	0	0	0	0
118.5	0	0	0	0	0	0	0	0	0	0	0	0	0
119.5	0	0	0	0	0	0	0	0	0	0	0	0	0
120.5	0	0	0	0	0	0	0	0	0	0	0	0	0
121.5	0	0	0	0	0	0	0	0	0	0	0	0	0
122.5	0	0	0	0	0	0	0	0	0	0	0	0	0
123.5	0	0	0	0	0	0	0	0	0	0	0	0	0
124.5	0	0	0	0	0	0	0	0	0	0	0	0	0
125.5	0	0	0	0	0	0	0	0	0	0	0	0	0
126.5	0	0	0	0	0	0	0	0	0	0	0	0	0
127.5	0	0	0	0	0	0	0	0	0	0	0	0	0
128.5	0	0	0	0	0	0	0	0	0	0	0	0	0
129.5	0	0	0	0	0	0	0	0	0	0	0	0	0
130.5	0	0	0	0	0	0	0	0	0	0	0	0	0
131.5	0	0	0	0	0	0	0	0	0	0	0	0	0
132.5	0	0	0	0	0	0	0	0	0	0	0	0	0
133.5	0	0	0	0	0	0	0	0	0	0	0	0	0
134.5	0	0	0	0	0	0	0	0	0	0	0	0	0
135.5	0	0	0	0	0	0	0	0	0	0	0	0	0
136.5	0	0	0	0	0	0	0	0	0	0	0	0	0
137.5	0	0	0	0	0	0	0	0	0	0	0	0	0
138.5	0	0	0	0	0	0	0	0	0	0	0	0	0
139.5	0	0	0	0	0	0	0	0	0	0	0	0	0
140.5	0	0	0	0	0	0	0	0	0	0	0	0	0
141.5	0	0	0	0	0	0	0	0	0	0	0	0	0
142.5	0	0	0	0	0	0	0	0	0	0	0	0	0
143.5	0	0	0	0	0	0	0	0	0	0	0	0	0
144.5	0	0	0	0	0	0	0	0	0	0	0	0	0
145.5	0	0	0	0	0	0	0	0	0	0	0	0	0
146.5	0	0	0	0	0	0	0	0	0	0	0	0	0
147.5	0	0	0	0	0	0	0	0	0	0	0	0	0
148.5	0	0	0	0	0	0	0	0	0	0	0	0	0
149.5	0	0	0	0	0	0	0	0	0	0	0	0	0
150.5	0	0	0	0	0	0	0	0	0	0	0	0	0
151.5	0	0	0	0	0	0	0	0	0	0	0	0	0
152.5	0	0	0	0	0	0	0	0	0	0	0	0	0
153.5	0	0	0	0	0	0	0	0	0	0	0	0	0
154.5	0	0	0	0	0	0	0	0	0	0	0	0	0
155.5	0	0	0	0	0	0	0	0	0	0	0	0	0
156.5	0	0	0	0	0	0	0	0	0	0	0	0	0
157.5	0	0	0	0	0	0	0	0	0	0	0	0	0
158.5	0	0	0	0	0	0	0	0	0	0	0	0	0
159.5	0	0	0	0	0	0	0	0	0	0	0	0	0
160.5	0	0	0	0	0	0	0	0	0	0	0	0	0
161.5	0	0	0	0	0	0	0	0	0	0	0	0	0
162.5	0	0	0	0	0	0	0	0	0	0	0	0	0
163.5	0	0	0	0	0	0	0	0	0	0	0	0	0
164.5	0	0	0	0	0	0	0	0	0	0	0	0	0
165.5	0	0	0	0	0	0	0	0	0	0	0	0	0
166.5	0	0	0	0	0	0	0	0	0	0	0	0	0
167.5	0	0	0	0	0	0	0	0	0	0	0	0	0
168.5	0	0	0	0	0	0	0	0	0	0	0	0	0
169.5	0	0	0	0	0	0	0	0	0	0	0	0	0
170.5	0	0	0	0	0	0	0	0	0	0	0	0	0
171.5	0	0	0	0	0	0	0	0	0	0	0	0	0
172.5	0	0	0	0	0	0	0	0	0	0	0	0	0
173.5	0	0	0	0	0	0	0	0	0	0	0	0	0
174.5	0	0	0	0	0	0	0	0	0	0	0	0	0
175.5	0	0	0	0	0	0	0	0	0	0	0	0	0
176.5	0	0	0	0	0	0	0	0	0	0	0	0	0
177.5	0	0	0	0	0	0	0	0	0	0	0	0	0
178.5	0	0	0	0	0	0	0	0	0	0	0	0	0
179.5	0	0	0	0	0	0	0	0	0	0	0	0	0
180.5	0	0	0	0	0	0	0	0	0	0	0	0	0
181.5	0	0	0	0	0	0	0	0	0	0	0	0	0
182.5	0	0	0	0	0	0	0	0	0	0	0	0	0
183.5	0	0	0	0	0	0	0	0	0	0	0	0	0
184.5	0	0	0	0	0	0	0	0	0	0	0	0	0
185.5	0	0	0	0	0	0	0	0	0	0	0	0	0
186.5	0	0	0	0	0	0	0	0	0	0	0	0	0
187.5	0	0	0	0	0	0	0	0	0	0	0	0	0
188.5	0	0	0	0	0	0	0	0	0	0	0	0	0
189.5	0	0	0	0	0	0	0	0	0	0	0	0	0
190.5	0	0	0	0	0	0	0	0	0	0	0	0	0
191.5	0	0	0	0	0	0	0	0	0	0	0	0	0
192.5	0	0	0	0	0	0	0	0	0	0	0	0	0
193.5	0	0	0	0	0	0	0	0	0	0	0	0	0
194.5	0	0	0	0	0	0	0	0	0	0	0	0	0
195.5	0	0	0	0	0	0	0	0	0	0	0	0	0
196.5	0	0	0	0	0	0	0	0	0	0	0	0	0
197.5	0	0	0	0	0	0	0	0	0	0	0	0	0
198.5	0	0	0	0	0	0	0	0	0	0	0	0	0
199.5	0	0	0	0	0	0	0	0	0	0	0	0	0
200.5	0	0	0	0	0	0	0	0	0	0	0	0	0
201.5	0	0	0	0	0	0	0	0	0	0	0	0	0
202.5	0	0	0	0	0	0	0	0	0	0	0	0	0
203.5	0	0	0	0	0	0	0	0	0	0	0	0	0
204.5	0	0	0	0	0	0	0	0	0	0	0	0	0
205.5	0	0	0	0	0	0	0	0	0	0	0	0	0
206.5	0	0	0	0	0	0	0	0	0	0	0	0	0
207.5	0	0	0	0	0	0	0	0	0	0	0	0	0
208.5	0	0	0	0	0	0	0	0	0	0	0	0	0
209.5	0	0	0	0	0	0	0	0	0	0	0	0	0
210.5	0	0	0	0	0	0	0	0	0	0	0	0	0
211.5	0	0	0	0	0	0	0	0	0	0	0	0	0
212.5	0	0	0	0	0	0	0	0	0	0	0	0	0
213.5	0	0	0	0	0	0	0	0	0	0	0	0	0
214.5	0	0	0	0	0	0	0	0	0	0	0	0	0
215.5	0	0	0	0	0	0	0	0	0	0	0	0	0
216.5	0	0	0	0	0	0	0	0	0	0	0	0	0
217.5	0	0	0	0	0	0	0	0	0	0	0	0	0
218.5	0	0	0	0	0	0	0	0	0	0	0	0	0
219.5	0	0	0	0	0	0	0	0	0	0	0	0	0
220.5	0	0	0	0	0	0	0	0	0	0	0	0	0
221.5	0	0	0	0	0	0	0	0	0	0	0	0	0
222.5	0	0	0	0	0	0	0	0	0	0	0	0	0
223.5	0	0	0	0	0	0	0	0	0	0	0	0	0
224.5	0	0	0	0	0	0	0	0	0	0	0	0	0
225.5	0	0	0	0	0	0	0	0	0	0	0	0	0
226.5	0	0	0	0	0	0	0	0	0	0	0	0	0
227.5	0	0	0	0	0	0	0	0	0	0	0	0	0
228.5	0	0	0	0	0	0	0	0	0	0	0	0	0
229.5	0	0	0	0	0	0	0	0	0	0	0	0	0
230.5	0	0	0	0	0	0	0	0	0	0	0	0	0
231.5	0	0	0	0	0	0	0	0	0	0	0	0	0
232.5	0	0	0	0	0	0	0	0	0	0	0	0	0
233.5	0	0	0	0	0	0	0	0	0	0	0	0	0
234.5	0	0	0	0	0	0	0	0	0	0	0	0	0
235.5	0	0	0	0	0	0	0	0	0	0	0	0	0
236.5	0	0	0	0	0	0	0	0	0	0	0	0	0
237.5	0	0	0	0	0	0	0	0	0	0	0	0	0
238.5	0	0	0	0	0	0	0	0	0	0	0	0	0
239.5	0	0	0	0	0	0	0	0	0	0	0	0	0
240.5	0	0	0	0	0	0	0	0	0	0	0	0	0
241.5	0	0	0	0	0	0	0	0	0	0	0	0	0
242.5	0	0	0	0	0	0	0	0	0	0	0	0	0
243.5	0	0	0	0	0	0	0	0	0	0	0	0	0
244.5	0	0	0	0	0	0	0	0	0	0	0	0	0
245.5	0	0	0	0	0	0	0	0	0	0	0	0	0
246.5	0	0	0	0	0	0	0	0	0	0	0	0	0
247.5	0	0	0	0	0	0	0	0	0	0	0	0	0
248.5	0	0	0	0	0	0	0	0	0	0	0	0	0
249.5	0	0	0	0	0	0	0	0	0	0	0	0	0
250.5	0	0	0	0	0	0	0	0	0	0	0	0	0
251.5	0	0	0	0	0	0	0	0	0	0	0	0	0
252.5	0	0	0	0	0	0	0	0	0	0	0	0	0
253.5	0	0	0	0	0	0	0	0	0	0	0	0	0
254.5	0	0	0	0	0	0	0	0	0	0	0	0	0
255.5	0	0	0	0	0	0	0	0	0	0	0	0	0
256.5	0	0	0	0	0	0	0	0	0	0	0	0	0
257.5	0	0	0	0	0	0	0	0	0	0	0	0	0
258.5	0	0	0	0	0	0	0	0	0	0	0	0	0
259.5	0	0	0	0	0	0	0	0	0	0	0	0	0
260.5	0	0	0	0	0	0	0	0	0	0	0	0	0
261.5	0	0	0	0	0	0	0	0	0	0	0	0	0
262.5	0	0	0	0	0	0	0	0	0	0	0	0	0
263.5	0	0	0	0	0	0	0	0	0	0	0	0	0
264.5	0	0	0	0	0	0	0	0	0	0	0	0	0
265.5	0	0	0	0	0	0	0	0	0	0	0	0	0
266.5	0	0	0	0	0	0	0	0	0	0	0	0	0
267.5	0	0	0	0	0	0	0	0	0	0	0	0	0
268.5	0	0	0	0	0	0	0	0	0	0	0	0	0
269.5	0	0	0	0	0	0	0	0	0	0	0	0	0
270.5	0	0	0	0	0	0	0	0	0	0	0	0	0
271.5	0	0	0	0	0	0	0	0	0	0	0	0	0
272.5	0	0	0	0	0	0	0	0	0	0	0	0	0
273.5	0	0	0	0	0	0	0	0	0	0	0	0	0
274.5	0	0	0	0	0	0	0	0	0	0	0	0	0
275.5	0	0	0	0	0	0	0	0	0	0	0	0	0
276.5	0	0	0	0	0	0	0	0	0	0	0	0	0
277.5	0	0	0	0	0	0	0	0	0	0	0	0	0
278.5	0	0	0	0	0	0	0	0	0	0	0	0	0
279.5	0	0	0	0	0	0	0	0	0	0	0	0	0
280.5	0	0	0	0	0	0	0	0	0	0	0	0	0
281.5	0	0	0	0	0	0	0	0	0	0	0	0	0
282.5	0	0	0	0	0	0	0	0	0	0	0	0	0
283.5	0	0	0	0	0	0	0	0	0	0	0	0	0
284.5	0	0	0	0	0	0	0	0	0	0	0	0	0
285.5	0	0	0	0	0	0	0	0	0	0	0	0	0
286.5	0	0	0	0	0	0	0	0	0	0	0	0	0
287.5	0	0	0	0	0	0	0	0	0	0	0	0	0
288.5	0	0	0	0	0	0	0	0	0	0	0	0	0
289.5	0	0	0	0	0	0	0	0	0	0	0	0	0
290.5	0	0	0	0	0	0	0	0	0	0	0	0	0
291.5	0	0	0	0	0	0	0	0	0	0	0	0	0
292.5	0	0	0	0	0	0	0	0	0	0	0	0	0
293.5	0	0	0	0	0	0	0	0	0	0	0	0	0
294.5	0	0	0	0	0	0	0	0	0	0	0	0	0
295.5	0	0	0	0	0	0	0	0	0	0	0	0	0
296.5	0	0	0	0	0	0	0	0	0	0	0	0	0
297.5	0	0	0	0	0	0	0	0	0	0	0	0	0
298.5	0	0	0	0	0	0	0	0	0	0	0	0	0
299.5	0	0	0	0	0	0	0	0	0	0	0	0	0
300.5	0	0	0	0	0	0	0	0	0	0	0	0	0
301.5	0	0	0	0	0	0	0	0	0	0	0	0	0
302.5	0	0	0	0	0	0	0	0	0	0	0	0	0
303.5	0	0	0	0	0	0	0	0	0	0	0	0	0
304.5	0	0	0	0	0	0	0	0	0	0	0	0	0
305.5	0	0	0	0	0	0	0	0	0	0	0	0	0
306.5	0	0	0	0	0	0	0	0	0	0	0	0	0
307.5	0	0	0	0	0	0	0	0	0	0	0	0	0
308.5	0	0	0	0	0	0	0	0	0	0	0	0	0
309.5	0	0	0	0	0	0	0	0	0	0	0	0	0
310.5	0	0	0	0	0	0	0	0	0	0	0	0	0
311.5	0	0	0	0	0	0	0	0	0	0	0	0	0
312.5	0	0	0	0	0	0	0	0	0	0	0	0	0
313.5	0	0	0	0	0	0	0	0	0	0	0	0	0
314.5	0	0	0	0	0	0	0	0	0	0	0	0	0
315.5	0	0	0	0	0	0	0	0	0	0	0	0	0
316.5	0	0	0	0	0	0	0	0	0	0	0	0	0
317.5	0	0	0	0	0	0	0	0	0	0	0	0	0
318.5	0	0	0	0	0	0	0	0	0	0	0	0	0
319.5	0	0	0	0	0	0	0	0	0	0	0	0	0
320.5	0	0	0	0	0	0	0	0	0	0	0	0	0
321.5	0	0	0	0	0	0	0	0	0	0	0	0	0
322.5	0	0	0	0	0	0	0	0	0	0	0	0	0
323.5	0	0	0	0	0	0	0	0	0	0	0	0	0
324.5	0	0	0	0	0	0	0	0	0	0	0	0	0
325.5	0	0	0	0	0	0	0	0	0	0	0	0	0
326.5	0	0	0	0	0	0	0	0	0	0	0	0	0
327.5	0	0	0	0	0	0	0	0	0	0	0	0	0
328.5	0	0	0	0	0	0	0	0	0	0	0	0	0
329.5	0	0	0	0	0	0	0	0	0	0	0	0	0
330.5	0	0	0	0	0	0	0	0	0	0	0	0	0
331.5	0	0	0	0	0	0	0	0	0	0	0	0	0
332.5	0	0	0	0	0	0	0	0	0	0	0	0	0
333.5	0	0	0	0	0	0	0	0	0	0	0	0	0
334.5	0	0	0	0	0	0	0	0	0	0	0	0	0
335.5	0	0	0	0	0	0	0	0	0	0	0	0	0
336.5	0	0	0	0	0	0	0	0	0	0	0	0	0
337.5	0	0	0	0	0	0	0	0	0	0	0	0	0
338.5	0	0	0	0	0	0	0	0	0	0	0	0	0
339.5	0	0	0	0	0	0	0	0	0	0	0	0	0
340.5	0	0	0	0	0	0	0	0	0	0	0	0	0
341.5	0	0	0	0	0	0	0	0	0	0	0	0	0
342.5	0	0	0	0	0	0	0	0	0	0	0	0	0
343.5	0	0	0	0	0	0	0	0	0	0	0	0	0
344.5	0	0	0	0	0	0	0	0	0	0	0	0	0
345.5	0	0	0	0	0	0	0	0	0	0	0	0	0
346.5	0	0	0	0	0	0	0	0	0	0	0	0	0
347.5	0	0	0	0	0	0	0	0	0	0	0	0	0
348.5	0	0	0	0	0	0	0	0	0	0	0	0	0
349.5	0	0	0	0	0	0	0	0	0	0	0	0	0
350.5	0	0	0	0	0	0	0	0	0	0	0	0	0
351.5	0	0	0	0	0	0	0	0	0	0	0	0	0
352.5	0	0	0	0	0	0	0	0	0	0	0	0	0
353.5	0	0	0	0	0	0	0	0	0	0	0	0	0
354.5	0	0	0	0	0	0	0	0	0	0	0	0	0
355.5	0	0	0	0	0	0	0	0	0	0	0	0	0
356.5	0	0	0	0	0	0	0	0	0	0	0	0	0
357.5	0	0	0	0	0	0	0	0	0	0	0	0	0
358.5	0	0	0	0	0	0	0	0	0	0	0	0	0
359.5	0	0	0	0	0	0	0	0	0	0	0	0	0
360.5	0	0	0	0	0	0	0	0	0	0	0	0	0
361.5	0	0	0	0	0	0	0	0	0	0	0	0	0
362.5	0	0	0	0	0	0	0	0	0	0	0	0	0
363.5	0	0	0	0	0	0	0	0	0	0	0	0	0
364.5	0	0	0	0	0	0	0	0	0	0	0	0	0
365.5	0	0	0	0	0	0	0	0	0	0	0	0	0
366.5	0	0	0	0	0	0	0	0	0	0	0	0	0
367.5	0	0	0	0	0	0	0	0	0	0	0	0	0
368.5	0	0	0	0	0	0	0	0	0	0	0	0	0
369.5	0	0	0	0	0	0	0	0	0	0	0	0	0
370.5	0	0	0	0	0	0	0	0	0	0	0	0	0
371.5	0	0	0	0	0	0	0	0	0	0	0	0	0
372.5	0	0	0	0	0	0	0	0	0	0	0	0	0
373.5	0	0	0	0	0	0	0	0	0	0	0	0	0
374.5	0	0	0	0	0	0	0	0	0	0	0	0	0
375.5	0	0	0	0	0	0	0	0	0	0	0	0	0
376.5	0	0	0	0	0	0	0	0	0	0	0	0	0
377.5	0	0	0	0	0	0	0	0	0	0	0	0	0
378.5	0	0	0	0	0	0	0	0	0	0	0	0	0
379.5	0	0	0	0	0	0	0	0	0	0	0	0	0
380.5	0	0	0	0	0	0	0	0	0	0	0	0	0
381.5	0	0	0	0	0	0	0	0	0	0	0	0	0
382.5	0	0	0	0	0	0	0	0	0	0	0	0	0
383.5	0	0	0	0	0	0	0	0	0	0	0	0	0
384.5	0	0	0	0	0	0	0	0	0	0	0	0	0
385.5	0	0	0	0	0	0	0	0	0	0	0	0	0
386.5	0	0	0	0	0	0	0	0	0	0	0	0	0
387.5	0	0	0	0	0	0	0	0	0	0	0	0	0
388.5	0	0	0	0	0	0	0	0	0	0	0	0	0
389.5	0	0	0	0	0	0	0	0	0	0	0	0	0
390.5	0	0	0	0	0	0	0	0	0	0	0	0	0
391.5	0	0	0	0	0	0	0	0	0	0	0	0	0
392.5	0	0	0	0	0	0	0	0	0	0	0	0	0
393.5	0	0	0	0	0	0	0	0	0	0	0	0	0
394.5	0	0	0	0	0	0	0	0	0	0	0	0	0
395.5	0	0	0	0	0	0	0	0	0	0	0	0	0
396.5	0	0	0	0	0	0	0	0	0	0	0	0	0
397.5	0	0	0	0	0	0	0	0	0	0	0	0	0
398.5	0	0	0	0	0	0	0	0	0	0	0	0	0
399.5	0	0	0	0	0	0	0	0	0	0	0	0	0
400.5	0	0	0	0	0	0	0	0	0	0	0	0	0
401.5	0	0	0	0	0	0	0	0	0	0	0	0	0
402.5	0	0	0	0	0	0	0	0	0	0	0	0	0
403.5	0	0	0	0	0	0	0	0	0	0	0	0	0
404.5	0	0	0	0	0	0	0	0	0	0	0	0	0
405.5	0	0	0	0	0	0	0	0	0	0	0	0	0
406.5	0	0	0	0	0	0	0	0	0	0	0	0	0
407.5	0	0	0	0	0	0	0	0	0	0	0	0	0
408.5	0	0	0	0	0	0	0	0	0	0	0	0	0
409.5	0	0	0	0	0	0	0	0	0	0	0	0	0
410.5	0	0	0	0	0	0	0	0	0	0	0	0	0
411.5	0	0	0	0	0	0	0	0	0	0	0	0	0
412.5	0	0	0	0	0	0	0	0	0	0	0	0	0
413.5	0	0	0	0	0	0	0	0	0	0	0	0	0
414.5	0	0	0	0	0	0	0	0	0	0	0	0	0
415.5	0	0	0	0	0	0	0	0	0	0	0	0	0
416.5	0	0	0	0	0	0	0	0	0	0	0	0	0
417.5	0	0	0	0	0	0	0	0	0	0	0	0	0
418.5	0	0	0	0	0	0	0	0	0	0	0	0	0
419.5	0	0	0	0	0	0	0	0	0	0	0	0	0
420.5	0	0	0	0	0	0	0	0	0	0	0	0	0
421.5	0	0	0	0	0	0	0	0	0	0	0	0	0
422.5	0	0	0	0	0	0	0	0	0	0	0	0	0
423.5	0	0	0	0	0	0	0	0	0	0	0	0	0
424.5	0	0	0	0	0	0	0	0	0	0	0	0	0
425.5	0	0	0	0	0	0	0	0	0	0	0	0	0
426.5	0	0	0	0	0	0	0	0	0	0	0	0	0
427.5	0	0	0	0	0	0	0	0	0	0	0	0	0
428.5	0	0	0	0	0	0	0	0	0	0	0	0	0
429.5	0	0	0	0	0	0	0	0	0	0	0	0	0
430.5	0	0	0	0	0	0	0	0	0	0	0	0	0
431.5	0	0	0	0	0	0	0	0	0	0	0	0	0
432.5	0	0	0	0	0	0	0	0	0	0	0	0	0
433.5	0	0	0	0	0	0	0	0	0	0	0	0	0
434.5	0	0	0	0	0	0	0	0	0	0	0	0	0
435.5	0	0	0	0	0	0	0	0	0	0	0	0	0
436.5	0	0	0	0	0	0	0	0	0	0	0	0	0
437.5	0	0	0	0	0	0	0	0	0	0	0	0	0
438.5	0	0	0	0	0	0	0	0	0	0	0	0	0
439.5	0	0	0	0	0	0	0	0	0	0	0	0	0
440.5	0	0	0	0	0	0	0	0	0	0	0	0	0
441.5	0	0	0	0	0	0	0	0	0	0	0	0	0
442.5	0	0	0	0	0	0	0	0	0	0	0	0	0
443.5	0	0	0	0	0	0	0	0	0	0	0	0	0
444.5	0	0	0	0	0	0	0	0	0	0	0	0	0
445.5	0	0	0	0	0	0	0	0	0	0	0	0	0
446.5	0	0	0	0	0	0	0	0	0	0	0	0	0
447.5	0	0	0	0	0	0	0	0	0	0	0	0	0
448.5	0	0	0	0	0	0	0	0	0	0	0	0	0
449.5	0	0	0	0	0	0	0	0	0	0	0	0	0
450.5	0	0	0	0	0	0	0	0	0	0	0	0	0
451.5	0	0	0	0	0	0	0	0	0	0	0	0	0
452.5	0	0	0	0	0	0	0	0	0	0	0	0	0
453.5	0	0	0	0	0	0	0	0	0	0	0	0	0
454.5	0	0	0	0	0	0	0	0	0	0	0	0	0
455.5	0	0	0	0	0	0	0	0	0	0	0	0	0
456.5	0	0	0	0	0	0	0	0	0	0	0	0	0
457.5	0	0	0	0	0	0	0	0	0	0	0	0	0
458.5	0	0	0	0	0	0	0	0	0	0	0	0	0
459.5	0	0	0	0	0	0	0	0	0	0	0	0	0
460.5	0	0	0	0	0	0	0	0	0	0	0	0	0
461.5	0	0	0	0	0	0	0	0	0	0	0	0	0
462.5	0	0	0	0	0	0	0	0	0	0	0	0	0
463.5	0	0	0	0	0	0	0	0	0	0	0	0	0
464.5	0	0	0	0	0	0	0	0	0	0	0	0	0
465.5	0	0	0	0	0	0	0	0	0	0	0	0	0
466.5	0	0	0	0	0	0	0	0	0	0	0	0	0
467.5	0	0	0	0	0	0	0	0	0	0	0	0	0
468.5	0	0	0	0	0	0	0	0	0	0	0	0	0
469.5	0	0	0	0	0	0	0	0	0	0	0	0	0
470.5	0	0	0	0	0	0	0	0	0	0	0	0	0
471.5	0	0	0	0	0	0	0	0	0	0	0	0	0
472.5	0	0	0	0	0	0	0	0	0	0	0	0	0
473.5	0	0	0	0	0	0	0	0	0	0	0	0	0
474.5	0	0	0	0	0	0	0	0	0	0	0	0	0
475.5	0	0	0	0	0	0	0	0	0	0	0	0	0
476.5	0	0	0	0	0	0	0	0	0	0	0	0	0
477.5	0	0	0	0	0	0	0	0	0	0	0	0	0
478.5	0	0	0	0	0	0	0	0	0	0	0	0	0
479.5	0	0	0	0	0	0	0	0	0	0	0	0	0
480.5	0	0	0	0	0	0	0	0	0	0	0	0	0
481.5	0	0	0	0	0	0	0	0	0	0	0	0	0
482.5	0	0	0	0	0	0	0	0	0	0	0	0	0
483.5	0	0	0	0	0	0	0	0	0	0	0	0	0
484.5	0	0	0	0	0	0	0	0	0	0	0	0	0
485.5	0	0	0	0	0	0	0	0	0	0	0	0	0
486.5	0	0	0	0	0	0	0	0	0	0	0	0	0
487.5	0	0	0	0	0	0	0	0	0	0	0	0	0
488.5	0	0	0	0	0	0	0	0	0	0	0	0	0
489.5	0	0	0	0	0	0	0	0	0	0	0	0	0
490.5	0	0	0	0	0	0	0	0	0	0	0	0	0
491.5	0	0	0	0	0	0	0	0	0	0	0	0	0
492.5	0	0	0	0	0	0	0	0	0	0	0	0	0
493.5	0	0	0	0	0	0	0	0	0	0	0	0	0
494.5	0	0	0	0	0	0	0	0	0	0	0	0	0
495.5	0	0	0	0	0	0	0	0	0	0	0	0	0
496.5	0	0	0	0	0	0	0	0	0	0	0	0	0
497.5	0	0	0	0	0	0	0	0	0	0	0	0	0
498.5	0	0	0	0	0	0	0	0	0	0	0	0	0
499.5	0	0	0	0	0	0	0	0	0	0	0	0	0
500.5	0	0	0	0	0	0	0	0	0	0	0	0	0
501.5	0	0	0	0	0	0	0	0	0	0	0	0	0
502.5	0	0	0	0	0	0	0	0	0	0	0	0	0
503.5	0	0	0	0	0	0	0	0	0	0	0	0	0
504.5	0	0	0	0	0	0	0	0	0	0	0	0	0
505.5	0	0	0	0	0	0	0	0	0	0	0	0	0
506.5	0	0	0	0	0	0	0	0	0	0	0	0	0
507.5	0	0	0	0	0	0	0	0	0	0	0	0	0
508.5	0	0	0	0	0	0	0	0	0	0	0	0	0
509.5	0	0	0	0	0	0	0	0	0	0	0	0	0
510.5	0	0	0	0	0	0	0	0	0	0	0	0	0
511.5	0	0	0	0	0	0	0	0	0	0	0	0	0
512.5	0	0	0	0	0	0	0	0	0	0	0	0	0
513.5	0	0	0	0	0	0	0	0	0	0	0	0	0
514.5	0	0	0	0	0	0	0	0	0	0	0	0	0
515.5	0	0	0	0	0	0	0	0	0	0	0	0	0
516.5	0	0	0	0	0	0	0	0	0	0	0	0	0
517.5	0	0	0	0	0	0	0	0	0	0	0	0	0
518.5	0	0	0	0	0	0	0	0	0	0	0	0	0
519.5	0	0	0	0	0	0	0	0	0	0	0	0	0
520.5	0	0	0	0	0	0	0	0	0	0	0	0	0
521.5	0	0	0	0	0	0	0	0	0	0	0	0	0
522.5	0	0	0	0	0	0	0	0	0	0	0	0	0
523.5	0	0	0	0	0	0	0	0	0	0	0	0	0
524.5	0	0	0	0	0	0	0	0	0	0	0	0	0
525.5	0	0	0	0	0	0	0	0	0	0	0	0	0
526.5	0	0	0	0	0	0	0	0	0	0	0	0	0
527.5	0	0	0	0	0	0	0	0	0	0	0	0	0
528.5	0	0	0	0	0	0	0	0	0	0	0	0	0
529.5	0	0	0	0	0	0	0	0	0	0	0	0	0
530.5	0	0	0	0	0	0	0	0	0	0	0	0	0
531.5	0	0	0	0	0	0	0	0	0	0	0	0	0
532.5	0	0	0	0	0	0	0	0	0	0	0	0	0
533.5	0	0	0	0	0	0	0	0	0	0	0	0	0
534.5	0	0	0	0	0	0	0	0	0	0	0	0	0
535.5	0	0	0	0	0	0	0	0	0	0	0	0	0
536.5	0	0	0	0	0	0	0	0	0	0	0	0	0
537.5	0	0	0	0	0	0	0	0	0	0	0	0	0
538.5	0	0	0	0	0	0	0	0	0	0	0	0	0
539.5	0	0	0	0	0	0	0	0	0	0	0	0	0
540.5	0	0	0	0	0	0	0	0	0	0	0	0	0
541.5	0	0	0	0	0	0	0	0	0	0	0	0	0
542.5	0	0	0	0	0	0	0	0	0	0	0	0	0
543.5	0	0	0	0	0	0	0	0	0	0	0	0	0
544.5	0	0	0	0	0	0	0	0	0	0	0	0	0
545.5	0	0	0	0	0	0	0	0	0	0	0	0	0
546.5	0	0	0	0	0	0	0	0	0	0	0	0	0
547.5	0	0	0	0	0	0	0	0	0	0	0	0	0
548.5	0	0	0	0	0	0	0	0	0	0	0	0	0
549.5	0	0	0	0	0	0	0	0	0	0	0	0	0
550.5	0	0	0	0	0	0	0	0	0	0	0	0	0
551.5	0	0	0	0	0	0	0	0	0	0	0	0	0
552.5	0	0	0	0	0	0	0	0	0	0	0	0	0
553.5	0	0	0	0	0	0	0	0	0	0	0	0	0
554.5	0	0	0	0	0	0	0	0	0	0	0	0	0
555.5	0	0	0	0	0	0	0	0	0	0	0	0	0
556.5	0	0	0	0	0	0	0	0	0	0	0	0	0
557.5	0	0	0	0	0	0	0	0	0	0	0	0	0
558.5	0	0	0	0	0	0	0	0	0	0	0	0	0
559.5	0	0	0	0	0	0	0	0	0	0	0	0	0
560.5	0	0	0	0	0	0	0	0	0	0	0	0	0
561.5	0	0	0	0	0	0	0	0	0	0	0	0	0
562.5	0	0	0	0	0	0	0	0	0	0	0	0	0
563.5	0	0	0	0	0	0	0	0	0	0	0	0	0
564.5	0	0	0	0	0	0	0	0	0	0	0	0	0
565.5	0	0	0	0	0	0	0	0	0	0	0	0	0
566.5	0	0	0	0	0	0	0	0	0	0	0	0	0
567.5	0	0	0	0	0	0	0	0	0	0	0	0	0
568.5	0	0	0	0	0	0	0	0	0	0	0	0	0
569.5	0	0	0	0	0	0	0	0	0	0	0	0	0
570.5	0	0	0	0	0	0	0	0	0	0	0	0	0
571.5	0	0	0	0	0	0	0	0	0	0	0	0	0
572.5	0	0	0	0	0	0	0	0	0	0	0	0	0
573.5	0	0	0	0	0	0	0	0	0	0	0	0	0
574.5	0	0	0	0	0	0	0	0	0	0	0	0	0
575.5	0	0	0	0	0	0	0	0	0	0	0	0	0
576.5	0	0	0	0	0	0	0	0	0	0	0	0	0
577.5	0	0	0	0	0	0	0	0	0	0	0	0	0
578.5	0	0	0	0	0	0	0	0	0	0	0	0	0
579.5	0	0	0	0	0	0	0	0	0	0	0	0	0
580.5	0	0	0	0	0	0	0	0	0	0	0	0	0
581.5	0	0	0	0	0	0	0	0	0	0	0	0	0
582.5	0	0	0	0	0	0	0	0	0	0	0	0	0
583.5	0	0	0	0	0	0	0	0	0	0	0	0	0
584.5	0	0	0	0	0	0	0	0	0	0	0	0	0
585.5	0	0	0	0	0	0	0	0	0	0	0	0	0
586.5	0	0	0	0	0	0	0	0	0	0	0	0	0
587.5	0	0	0	0	0	0	0	0	0	0	0	0	0
588.5	0	0	0	0	0	0	0	0	0	0	0	0	0
589.5	0	0	0	0	0	0	0	0	0	0	0	0	0
590.5	0	0	0	0	0	0	0	0	0	0	0	0	0
591.5	0	0	0	0	0	0	0	0	0	0	0	0	0
592.5	0	0	0	0	0	0	0	0	0	0	0	0	0
593.5	0	0	0	0	0	0	0	0	0	0	0	0	0
594.5	0	0	0	0	0	0	0	0	0	0	0	0	0
595.5	0	0	0	0	0	0	0	0	0	0	0	0	0
596.5	0	0	0	0	0	0	0	0	0	0	0	0	0
597.5	0	0	0	0	0	0	0	0	0	0	0	0	0
598.5	0	0	0	0	0	0	0	0	0	0	0	0	0
599.5	0	0	0	0	0	0	0	0	0	0	0	0	0
600.5	0	0	0	0	0	0	0	0	0	0	0	0	0
601.5	0	0	0	0	0	0	0	0	0	0	0	0	0
602.5	0	0	0	0	0	0	0	0	0	0	0	0	0
603.5	0	0	0	0	0	0	0	0	0	0	0	0	0
604.5	0	0	0	0	0	0	0	0	0	0	0	0	0
605.5	0	0	0	0	0	0	0	0	0	0	0	0	0
606.5	0	0	0	0	0	0	0	0	0	0	0	0	0
607.5	0	0	0	0	0	0	0	0	0	0	0	0	0
608.5	0	0	0	0	0	0	0	0	0	0	0	0	0
609.5	0	0	0	0	0	0	0	0	0	0	0	0	0
610.5	0	0	0	0	0	0	0	0	0	0	0	0	0
611.5	0	0	0	0	0	0	0	0	0	0	0	0	0
612.5	0	0	0	0	0	0	0	0	0	0	0	0	0
613.5	0	0	0	0	0	0	0	0	0	0	0	0	0
614.5	0	0	0	0	0	0	0	0	0	0	0	0	0
615.5	0	0	0	0	0	0	0	0	0	0	0	0	0
616.5	0	0	0	0	0	0	0	0	0	0	0	0	0
617.5	0	0	0	0	0	0	0	0	0	0	0	0	0
618.5	0	0	0	0	0	0	0	0	0	0	0	0	0
619.5	0	0	0	0	0	0	0	0	0	0	0	0	0
620.5	0	0	0	0	0	0	0	0	0	0	0	0	0
621.5	0	0	0	0	0	0	0	0	0	0	0	0	0
622.5	0	0	0	0	0	0	0	0	0	0	0	0	0
623.5	0	0	0	0	0	0	0	0	0	0	0	0	0
624.5	0	0	0	0	0	0	0	0	0	0	0	0	0
625.5	0	0	0	0	0	0	0	0	0	0	0	0	0
626.5	0	0	0	0	0	0	0	0	0	0	0	0	0
627.5	0	0	0	0	0	0	0	0	0	0	0	0	0
628.5	0	0	0	0	0	0	0	0	0	0	0	0	0
629.5	0	0	0	0	0	0	0	0	0	0	0	0	0
630.5	0	0	0	0	0	0	0	0	0	0	0	0	0
631.5	0	0	0	0	0	0	0	0	0	0	0	0	0
632.5	0	0	0	0	0	0	0	0	0	0	0	0	0
633.5	0	0	0	0	0	0	0	0	0	0	0	0	0
634.5	0	0	0	0	0	0	0	0	0	0	0	0	0
635.5	0	0	0	0	0	0	0	0	0	0	0	0	0
636.5	0	0	0	0	0	0	0	0	0	0	0	0	0
637.5	0	0	0	0	0	0	0	0	0	0	0	0	0
638.5	0	0	0	0	0	0	0	0	0	0	0	0	0
639.5	0	0	0	0	0	0	0	0	0	0	0	0	0
640.5	0	0	0	0	0	0	0	0	0	0	0	0	0
641.5	0	0	0	0	0	0	0	0	0	0	0	0	0
642.5	0	0	0	0	0	0	0	0	0	0	0	0	0
643.5	0	0	0	0	0	0	0	0	0	0	0	0	0
644.5	0	0	0	0	0	0	0	0	0	0	0	0	0
645.5	0	0	0	0	0	0	0	0	0	0	0	0	0
646.5	0	0	0	0	0	0	0	0	0	0	0	0	0
647.5	0	0	0	0	0	0	0	0	0	0	0	0	0
648.5	0	0	0	0	0	0	0	0	0	0	0	0	0
649.5	0	0	0	0	0	0	0	0	0	0	0	0	0
650.5	0	0	0	0	0	0	0	0	0	0	0	0	0
651.5	0	0	0	0	0	0	0	0	0	0	0	0	0
652.5	0	0	0	0	0	0	0	0	0	0	0	0	0
653.5	0	0	0	0	0	0	0	0	0	0	0	0	0
654.5	0	0	0	0	0	0	0	0	0	0	0	0	0
655.5	0	0	0	0	0	0	0	0	0	0	0	0	0
656.5	0	0	0	0	0	0	0	0	0	0	0	0	0
657.5	0	0	0	0	0	0	0	0	0	0	0	0	0
658.5	0	0	0	0	0	0	0	0	0	0	0	0	0
659.5	0	0	0	0	0	0	0	0	0	0	0	0	0
660.5	0	0	0	0	0	0	0	0	0	0	0	0	0
661.5	0	0	0	0	0	0	0	0	0	0	0	0	0
662.5	0	0	0	0	0	0	0	0	0	0	0	0	0
663.5	0	0	0	0	0	0	0	0	0	0	0	0	0
664.5	0	0	0	0	0	0	0	0	0	0	0	0	0
665.5	0	0	0	0	0	0	0	0	0	0	0	0	0
666.5	0	0	0	0	0	0	0	0	0	0	0	0	0
667.5	0	0	0	0	0	0	0	0	0	0	0	0	0
668.5	0	0	0	0	0	0	0	0	0	0	0	0	0
669.5	0	0	0	0	0	0	0	0	0	0	0	0	0
670.5	0	0	0	0	0	0	0	0	0	0	0	0	0
671.5	0	0	0	0	0	0	0	0	0	0	0	0	0
672.5	0	0	0	0	0	0	0	0	0	0	0	0	0
673.5	0	0	0	0	0	0	0	0	0	0	0	0	0
674.5	0	0	0	0	0	0	0	0	0	0	0	0	0
675.5	0	0	0	0	0	0	0	0	0	0	0	0	0
676.5	0	0	0	0	0	0	0	0	0	0	0	0	0
677.5	0	0	0	0	0	0	0	0	0	0	0	0	0
678.5	0	0	0	0	0	0	0	0	0	0	0	0	0
679.5	0	0	0	0	0	0	0	0	0	0	0	0	0
680.5	0	0	0	0	0	0	0	0	0	0	0	0	0
681.5	0	0	0	0	0	0	0	0	0	0	0	0	0
682.5	0	0	0	0	0	0	0	0	0	0	0	0	0
683.5	0	0	0	0	0	0	0	0	0	0	0	0	0
684.5	0	0	0	0	0	0	0	0	0	0	0	0	0
685.5	0	0	0	0	0	0	0	0	0	0	0	0	0
686.5	0	0	0	0	0	0	0	0	0	0	0	0	0
687.5	0	0	0	0	0	0	0	0	0	0	0	0	0
688.5	0	0	0	0	0	0	0	0	0	0	0	0	0
689.5	0	0	0	0	0	0	0	0	0	0	0	0	0
690.5	0	0	0	0	0	0	0	0	0	0	0	0	0
691.5	0	0	0	0	0	0	0	0	0	0	0	0	0
692.5	0	0	0	0	0	0	0	0	0	0	0	0	0
693.5	0	0	0	0	0	0	0	0	0	0	0	0	0
694.5	0	0	0	0	0	0	0	0	0	0	0	0	0
695.5	0	0	0	0	0	0	0	0	0	0	0	0	0
696.5	0	0	0	0	0	0	0	0	0	0	0	0	0
697.5	0	0	0	0	0	0	0	0	0	0	0	0	0
698.5	0	0	0	0	0	0	0	0	0	0	0	0	0
699.5	0	0	0	0	0	0	0	0	0	0	0	0	0
700.5	0	0	0	0	0	0	0	0	0	0	0	0	0
701.5	0	0	0	0	0	0	0	0	0	0	0	0	0
702.5	0	0	0	0	0	0	0	0	0	0	0	0	0
703.5	0	0	0	0	0	0	0	0	0	0	0	0	0
704.5	0	0	0	0	0	0	0	0	0	0	0	0	0
705.5	0	0	0	0	0	0	0	0	0	0	0	0	0
706.5	0	0	0	0	0	0	0	0	0	0	0	0	0
707.5	0	0	0	0	0	0	0	0	0	0	0	0	0
708.5	0	0	0	0	0	0	0	0	0	0	0	0	0
709.5	0	0	0	0	0	0	0	0	0	0	0	0	0
710.5	0	0	0	0	0	0	0	0	0	0	0	0	0
711.5	0	0	0	0	0	0	0	0	0	0	0	0	0
712.5	0	0	0	0	0	0	0	0	0	0	0	0	0
713.5	0	0	0	0	0	0	0	0	0	0	0	0	0
714.5	0	0	0	0	0	0	0	0	0	0	0	0	0
715.5	0	0	0	0	0	0	0	0	0	0	0	0	0
716.5	0	0	0	0	0	0	0	0	0	0	0	0	0
717.5	0	0	0	0	0	0	0	0	0	0	0	0	0
718.5	0	0	0	0	0	0	0	0	0	0	0	0	0
719.5	0	0	0	0	0	0	0	0	0	0	0	0	0
720.5	0	0	0	0	0	0	0	0	0	0	0	0	0
721.5	0	0	0	0	0	0	0	0	0	0	0	0	0
722.5	0	0	0	0	0	0	0	0	0	0	0	0	0
723.5	0	0	0	0	0	0	0	0	0	0	0	0	0
724.5	0	0	0	0	0	0	0	0	0	0	0	0	0
725.5	0	0	0	0	0	0	0	0	0	0	0	0	0
726.5	0	0	0	0	0	0	0	0	0	0	0	0	0
727.5	0	0	0	0	0	0	0	0	0	0	0	0	0
728.5	0	0	0	0	0	0	0	0	0	0	0	0	0
729.5	0	0	0	0	0	0	0	0	0	0	0	0	0
730.5	0	0	0	0	0	0	0	0	0	0	0	0	0
731.5	0	0	0	0	0	0	0	0	0	0	0	0	0
732.5	0	0	0	0	0	0	0	0	0	0	0	0	0
733.5	0	0	0	0	0	0	0	0	0	0	0	0	0
734.5	0	0	0	0	0	0	0	0	0	0	0	0	0
735.5	0	0	0	0	0	0	0	0	0	0	0	0	0
736.5	0	0	0	0	0	0	0	0	0	0	0	0	0
737.5	0	0	0	0	0	0	0	0	0	0	0	0	0
738.5	0	0	0	0	0	0	0	0	0	0	0	0	0
739.5	0	0	0	0	0	0	0	0	0	0	0	0	0
740.5	0	0	0	0	0	0	0	0	0	0	0	0	0
741.5	0	0	0	0	0	0	0	0	0	0	0	0	0
742.5	0	0	0	0	0	0	0	0	0	0	0	0	0
743.5	0	0	0	0	0	0	0	0	0	0	0	0	0
744.5	0	0	0	0	0	0	0	0	0	0	0	0	0
745.5	0	0	0	0	0	0	0	0	0	0	0	0	0
746.5	0	0	0	0	0	0	0	0	0	0	0	0	0
747.5	0	0	0	0	0	0	0	0	0	0	0	0	0
748.5	0	0	0	0	0	0	0	0	0	0	0	0	0
749.5	0	0	0	0	0	0	0	0	0	0	0	0	0
750.5	0	0	0	0	0	0	0	0	0	0	0	0	0
751.5	0	0	0	0	0	0	0	0	0	0	0	0	0
752.5	0	0	0	0	0	0	0	0	0	0	0	0	0
753.5	0	0	0	0	0	0	0	0	0	0	0	0	0
754.5	0	0	0	0	0	0	0	0	0	0	0	0	0
755.5	0	0	0	0	0	0	0	0	0	0	0	0	0
756.5	0	0	0	0	0	0	0	0	0	0	0	0	0
757.5	0	0	0	0	0	0	0	0	0	0	0	0	0
758.5	0	0	0	0	0	0	0	0	0	0	0	0	0
759.5	0	0	0	0	0	0	0	0	0	0	0	0	0
760.5	0	0	0	0	0	0	0	0	0	0	0	0	0
761.5	0	0	0	0	0	0	0	0	0	0	0	0	0
762.5	0	0	0	0	0	0	0	0	0	0	0	0	0
763.5	0	0	0	0	0	0	0	0	0	0	0	0	0
764.5	0	0	0	0	0	0	0	0	0	0	0	0	0
765.5	0	0	0	0	0	0	0	0	0	0	0	0	0
766.5	0	0	0	0	0	0	0	0	0	0	0	0	0
767.5	0	0	0	0	0	0	0	0	0	0	0	0	0
768.5	0	0	0	0	0	0	0	0	0	0	0	0	0
769.5	0	0	0	0	0	0	0	0	0	0	0	0	0
770.5	0	0	0	0	0	0	0	0	0	0	0	0	0
771.5	0	0	0	0	0	0	0	0	0	0	0	0	0
772.5	0	0	0	0	0	0	0	0	0	0	0	0	0
773.5	0	0	0	0	0	0	0	0	0	0	0	0	0
774.5	0	0	0	0	0	0	0	0	0	0	0	0	0
775.5	0	0	0	0	0	0	0	0	0	0	0	0	0
776.5	0	0	0	0	0	0	0	0	0	0	0	0	0
777.5	0	0	0	0	0	0	0	0	0	0	0	0	0
778.5	0	0	0	0	0	0	0	0	0	0	0	0	0
779.5	0	0	0	0	0	0	0	0	0	0	0	0	0
780.5	0	0	0	0	0	0	0	0	0	0	0	0	0
781.5	0	0	0	0	0	0	0	0	0	0	0	0	0
782.5	0	0	0	0	0	0	0	0	0	0	0	0	0
783.5	0	0	0	0	0	0	0	0	0	0	0	0	0
784.5	0	0	0	0	0	0	0	0	0	0	0	0	0
785.5	0	0	0	0	0	0	0	0	0	0	0	0	0
786.5	0	0	0	0	0	0	0	0	0	0	0	0	0
787.5	0	0	0	0	0	0	0	0	0	0	0	0	0
788.5	0	0	0	0	0	0	0	0	0	0	0	0	0
789.5	0	0	0	0	0	0	0	0	0	0	0	0	0
790.5	0	0	0	0	0	0	0	0	0	0	0	0	0
791.5	0	0	0	0	0	0	0	0	0	0	0	0	0
792.5	0	0	0	0	0	0	0	0	0	0	0	0	0
793.5	0	0	0	0	0	0	0	0	0	0	0	0	0
794.5	0	0	0	0	0	0	0	0	0	0	0	0	0
795.5	0	0	0	0	0	0	0	0	0	0	0	0	0
796.5	0	0	0	0	0	0	0	0	0	0	0	0	0
797.5	0	0	0	0	0	0	0	0	0	0	0	0	0
798.5	0	0	0	0	0	0	0	0	0	0	0	0	0
799.5	0	0	0	0	0	0	0	0	0	0	0	0	0
800.5	0	0	0	0	0	0	0	0	0	0	0	0	0
801.5	0	0	0	0	0	0	0	0	0	0	0	0	0
802.5	0	0	0	0	0	0	0	0	0	0	0	0	0
803.5	0	0	0	0	0	0	0	0	0	0	0	0	0
804.5	0	0	0	0	0	0	0	0	0	0	0	0	0
805.5	0	0	0	0	0	0	0	0	0	0	0	0	0
806.5	0	0	0	0	0	0	0	0	0	0	0	0	0
807.5	0	0	0	0	0	0	0	0	0	0	0	0	0
808.5	0	0	0	0	0	0	0	0	0	0	0	0	0
809.5	0	0	0	0	0	0	0	0	0	0	0	0	0
810.5	0	0	0	0	0	0	0	0	0	0	0	0	0
811.5	0	0	0	0	0	0	0	0	0	0	0	0	0
812.5	0	0	0	0	0	0	0	0	0	0	0	0	0
813.5	0	0	0	0	0	0	0	0	0	0	0	0	0
814.5	0	0	0	0	0	0	0	0	0	0	0	0	0
815.5	0	0	0	0	0	0	0	0	0	0	0	0	0
816.5	0	0	0	0	0	0	0	0	0	0	0	0	0
817.5	0	0	0	0	0	0	0	0	0	0	0	0	0
818.5	0	0	0	0	0	0	0	0	0	0	0	0	0
819.5	0	0	0	0	0	0	0	0	0	0	0	0	0
820.5	0	0	0	0	0	0	0	0	0	0	0	0	0
821.5	0	0	0	0	0	0	0	0	0	0	0	0	0
822.5	0	0	0	0	0	0	0	0	0	0	0	0	0
823.5	0	0	0	0	0	0	0	0	0	0	0	0	0
824.5	0	0	0	0	0	0	0	0	0	0	0	0	0
825.5	0	0	0	0	0	0	0	0	0	0	0	0	0
826.5	0	0	0	0	0	0	0	0	0	0	0	0	0
827.5	0	0	0	0	0	0	0	0	0	0	0	0	0
828.5	0	0	0	0	0	0	0	0	0	0	0	0	0
829.5	0	0	0	0	0	0	0	0	0	0	0	0	0
830.5	0	0	0	0	0	0	0	0	0	0	0	0	0
831.5	0	0	0	0	0	0	0	0	0	0	0	0	0
832.5	0	0	0	0	0	0	0	0	0	0	0	0	0
833.5	0	0	0	0	0	0	0	0	0	0	0	0	0
834.5	0	0	0	0	0	0	0	0	0	0	0	0	0
835.5	0	0	0	0	0	0	0	0	0	0	0	0	0
836.5	0	0	0	0	0	0	0	0	0	0	0	0	0
837.5	0	0	0	0	0	0	0	0	0	0	0	0	0
838.5	0	0	0	0	0	0	0	0	0	0	0	0	0
839.5	0	0	0	0	0	0	0	0	0	0	0	0	0
840.5	0	0	0	0	0	0	0	0	0	0	0	0	0
841.5	0	0	0	0	0	0	0	0	0	0	0	0	0
842.5	0	0	0	0	0	0	0	0	0	0	0	0	0
843.5	0	0	0	0	0	0	0	0	0	0	0	0	0
844.5	0	0	0	0	0	0	0	0	0	0	0	0	0
845.5	0	0	0	0	0	0	0	0	0	0	0	0	0
846.5	0	0	0	0	0	0	0	0	0	0	0	0	0
847.5	0	0	0	0	0	0	0	0	0	0	0	0	0
848.5	0	0	0	0	0	0	0	0	0	0	0	0	0
849.5	0	0	0	0	0	0	0	0	0	0	0	0	0
850.5	0	0	0	0	0	0	0	0	0	0	0	0	0
851.5	0	0	0	0	0	0	0	0	0	0	0	0	0
852.5	0	0	0	0	0	0	0	0	0	0	0	0	0
853.5	0	0	0	0	0	0	0	0	0	0	0	0	0
854.5	0	0	0	0	0	0	0	0	0	0	0	0	0
855.5	0	0	0	0	0	0	0	0	0	0	0	0	0
856.5	0	0	0	0	0	0	0	0	0	0	0	0	0
857.5	0	0	0	0	0	0	0	0	0	0	0	0	0
858.5	0	0	0	0	0	0	0	0	0	0	0	0	0
859.5	0	0	0	0	0	0	0	0	0	0	0	0	0
860.5	0	0	0	0	0	0	0	0	0	0	0	0	0
861.5	0	0	0	0	0	0	0	0	0	0	0	0	0
862.5	0	0	0	0	0	0	0	0	0	0	0	0	0
863.5	0	0	0	0	0	0	0	0	0	0	0	0	0
864.5	0	0	0	0	0	0	0	0	0	0	0	0	0
865.5	0	0	0	0	0	0	0	0	0	0	0	0	0
866.5	0	0	0	0	0	0	0	0	0	0	0	0	0
867.5	0	0	0	0	0	0	0	0	0	0	0	0	0
868.5	0	0	0	0	0	0	0	0	0	0	0	0	0
869.5	0	0	0	0	0	0	0	0	0	0	0	0	0
870.5	0	0	0	0	0	0	0	0	0	0	0	0	0
871.5	0	0	0	0	0	0	0	0	0	0	0	0	0
872.5	7	0	0	0	0	0	0	0	0	0.777778	0.824958	1.60274	-0.0471801
873.5	0	0	0	0	0	0	0	0	0	0	0	0	0
874.5	0	0	0	0	0	0	0	0	0	0	0	0	0
875.5	0	0	0	0	0	0	0	0	0	0	0	0	0
876.5	0	0	0	0	0	0	0	0	0	0	0	0	0
877.5	0	0	0	0	0	0	0	0	0	0	0	0	0
878.5	0	0	0	0	0	0	0	0	0	0	0	0	0
879.5	0	0	0	0	0	0	0	0	0	0	0	0	0
880.5	0	0	0	0	0	0	0	0	0	0	0	0	0
881.5	0	0	0	0	0	0	0	0	0	0	0	0	0
882.5	0	0	0	0	0	0	0	0	0	0	0	0	0
883.5	0	0	0	0	0	0	0	0	0	0	0	0	0
884.5	0	0	0	0	0	0	0	0	0	0	0	0	0
885.5	0	0	0	0	0	0	0	0	0	0	0	0	0
886.5	0	0	0	0	0	0	0	0	0	0	0	0	0
887.5	0	0	0	0	0	0	0	0	0	0	0	0	0
888.5	0	0	0	0	0	0	0	0	0	0	0	0	0
889.5	0	0	0	0	0	0	0	0	0	0	0	0	0
890.5	0	0	0	0	0	0	0	0	0	0	0	0	0
891.5	0	0	0	0	0	0	0	0	0	0	0	0	0
892.5	0	0	0	0	0	0	0	0	0	0	0	0	0
893.5	0	0	0	0	0	0	0	0	0	0	0	0	0
894.5	0	0	0	0	0	0	0	0	0	0	0	0	0
895.5	0	0	0	0	0	0	0	0	0	0	0	0	0
896.5	0	0	0	0	0	0	0	0	0	0	0	0	0
897.5	0	0	0	0	0	0	0	0	0	0	0	0	0
898.5	0	0	0	0	0	0	0	0	0	0	0	0	0
899.5	0	0	0	0	0	0	0	0	0	0	0	0	0
900.5	0	0	0	0	0	0	0	0	0	0	0	0	0
901.5	0	0	0	0	0	0	0	0	0	0	0	0	0
902.5	0	0	0	0	0	0	0	0	0	0	0	0	0
903.5	0	0	0	0	0	0	0	0	0	0	0	0	0
904.5	0	0	0	0	0	0	0	0	0	0	0	0	0
905.5	0	0	0	0	0	0	0	0	0	0	0	0	0
906.5	0	0	0	0	0	0	0	0	0	0	0	0	0
907.5	0	0	0	0	0	0	0	0	0	0	0	0	0
908.5	0	0	0	0	0	0	0	0	0	0	0	0	0
909.5	0	0	0	0	0	0	0	0	0	0	0	0	0
910.5	0	0	0	0	0	0	0	0	0	0	0	0	0
911.5	0	0	0	0	0	0	0	0	0	0	0	0	0
912.5	0	0	0	0	0	0	0	0	0	0	0	0	0
913.5	0	0	0	0	0	0	0	0	0	0	0	0	0
914.5	0	0	0	0	0	0	0	0	0	0	0	0	0
915.5	0	0	0	0	0	0	0	0	0	0	0	0	0
916.5	0	0	0	0	0	0	0	0	0	0	0	0	0
917.5	0	0	0	0	0	0	0	0	0	0	0	0	0
918.5	0	0	0	0	0	0	0	0	0	0	0	0	0
919.5	0	0	0	0	0	0	0	0	0	0	0	0	0
920.5	0	0	0	0	0	0	0	0	0	0	0	0	0
921.5	0	0	0	0	0	0	0	0	0	0	0	0	0
922.5	0	0	0	0	0	0	0	0	0	0	0	0	0
923.5	0	0	0	0	0	0	0	0	0	0	0	0	0
924.5	0	0	0	0	0	0	0	0	0	0	0	0	0
925.5	0	0	0	0	0	0	0	0	0	0	0	0	0
926.5	0	0	0	0	0	0	0	0	0	0	0	0	0
927.5	0	0	0	0	0	0	0	0	0	0	0	0	0
928.5	0	0	0	0	0	0	0	0	0	0	0	0	0
929.5	0	0	0	0	0	0	0	0	0	0	0	0	0
930.5	0	0	0	0	0	0	0	0	0	0	0	0	0
931.5	0	0	0	0	0	0	0	0	0	0	0	0	0
932.5	0	0	0	0	0	0	0	0	0	0	0	0	0
933.5	0	0	0	0	0	0	0	0	0	0	0	0	0
934.5	0	0	0	0	0	0	0	0	0	0	0	0	0
935.5	0	0	0	0	0	0	0	0	0	0	0	0	0
936.5	0	0	0	0	0	0	0	0	0	0	0	0	0
937.5	0	0	0	0	0	0	0	0	0	0	0	0	0
938.5	0	0	0	0	0	0	0	0	0	0	0	0	0
939.5	0	0	0	0	0	0	0	0	0	0	0	0	0
940.5	0	0	0	0	0	0	0	0	0	0	0	0	0
941.5	0	0	0	0	0	0	0	0	0	0	0	0	0
942.5	0	0	0	0	0	0	0	0	0	0	0	0	0
943.5	0	0	0	0	0	0	0	0	0	0	0	0	0
944.5	0	0	0	0	0	0	0	0	0	0	0	0	0
945.5	0	0	0	0	0	0	0	0	0	0	0	0	0
946.5	0	0	0	0	0	0	0	0	0	0	0	0	0
947.5	0	0	0	0	0	0	0	0	0	0	0	0	0
948.5	0	0	0	0	0	0	0	0	0	0	0	0	0
949.5	0	0	0	0	0	0	0	0	0	0	0	0	0
950.5	0	0	0	0	0	0	0	0	0	0	0	0	0
951.5	0	0	0	0	0	0	0	0	0	0	0	0	0
952.5	0	0	0	0	0	0	0	0	0	0	0	0	0
953.5	0	0	0	0	0	0	0	0	0	0	0	0	0
954.5	0	0	0	0	0	0	0	0	0	0	0	0	0
955.5	0	0	0	0	0	0	0	0	0	0	0	0	0
956.5	0	0	0	0	0	0	0	0	0	0	0	0	0
957.5	0	0	0	0	0	0	0	0	0	0	0	0	0
958.5	0	0	0	0	0	0	0	0	0	0	0	0	0
959.5	0	0	0	0	0	0	0	0	0	0	0	0	0
960.5	0	0	0	0	0	0	0	0	0	0	0	0	0
961.5	0	0	0	0	0	0	0	0	0	0	0	0	0
962.5	0	0	0	0	0	0	0	0	0	0	0	0	0
963.5	0	0	0	0	0	0	0	0	0	0	0	0	0
964.5	0	0	0	0	0	0	0	0	0	0	0	0	0
965.5	0	0	0	0	0	0	0	0	0	0	0	0	0
966.5	0	0	0	0	0	0	0	0	0	0	0	0	0
967.5	0	0	0	0	0	0	0	0	0	0	0	0	0
968.5	0	0	0	0	0	0	0	0	0	0	0	0	0
969.5	0	0	0	0	0	0	0	0	0	0	0	0	0
970.5	0	0	0	0	0	0	0	0	0	0	0	0	0
971.5	0	0	0	0	0	0	0	0	0	0	0	0	0
972.5	0	0	0	0	0	0	0	0	0	0	0	0	0
973.5	0	0	0	0	0	0	0	0	0	0	0	0	0
974.5	0	0	0	0	0	0	0	0	0	0	0	0	0
975.5	0	0	0	0	0	0	0	0	0	0	0	0	0
976.5	0	0	0	0	0	0	0	0	0	0	0	0	0
977.5	0	0	0	0	0	0	0	0	0	0	0	0	0
978.5	0	0	0	0	0	0	0	0	0	0	0	0	0
979.5	0	0	0	0	0	0	0	0	0	0	0	0	0
980.5	0	0	0	0	0	0	0	0	0	0	0	0	0
981.5	0	0	0	0	0	0	0	0	0	0	0	0	0
982.5	0	0	0	0	0	0	0	0	0	0	0	0	0
983.5	0	0	0	0	0	0	0	0	0	0	0	0	0
984.5	0	0	0	0	0	0	0	0	0	0	0	0	0
985.5	0	0	0	0	0	0	0	0	0	0	0	0	0
986.5	0	0	0	0	0	0	0	0	0	0	0	0	0
987.5	0	0	0	0	0	0	0	0	0	0	0	0	0
988.5	0	0	0	0	0	0	0	0	0	0	0	0	0
989.5	0	0	0	0	0	0	0	0	0	0	0	0	0
990.5	0	0	0	0	0	0	0	0	0	0	0	0	0
991.5	0	0	0	0	0	0	0	0	0	0	0	0	0
992.5	0	0	0	0	0	0	0	0	0	0	0	0	0
993.5	0	0	0	0	0	0	0	0	0	0	0	0	0
994.5	0	0	0	0	0	0	0	0	0	0	0	0	0
995.5	0	0	0	0	0	0	0	0	0	0	0	0	0
996.5	0	0	0	0	0	0	0	0	0	0	0	0	0
997.5	0	0	0	0	0	0	0	0	0	0	0	0	0
998.5	0	0	0	0	0	0	0	0	0	0	0	0	0
999.5	0	0	0	0	0	0	0	0	0	0	0	0	0
1000.5	0	0	0	0	0	0	0	0	0	0	0	0	0
1001.5	0	0	0	0	0	0	0	0	0	0	0	0	0
1002.5	0	0	0	0	0	0	0	0	0	0	0	0	0
1003.5	0	0	0	0	0	0	0	0	0	0	0	0	0
1004.5	0	0	0	0	0	0	0	0	0	0	0	0	0
1005.5	0	0	0	0	0	0	0	0	0	0	0	0	0
1006.5	0	0	0	0	0	0	0	0	0	0	0	0	0
1007.5	0	0	0	0	0	0	0	0	0	0	0	0	0
1008.5	0	0	0	0	0	0	0	0	0	0	0	0	0
1009.5	0	0	0	0	0	0	0	0	0	0	0	0	0
1010.5	0	0	0	0	0	0	0	0	0	0	0	0	0
1011.5	0	0	0	0	0	0	0	0	0	0	0	0	0
1012.5	0	0	0	0	0	0	0	0	0	0	0	0	0
1013.5	0	0	0	0	0	0	0	0	0	0	0	0	0
1014.5	0	0	0	0	0	0	0	0	0	0	0	0	0
1015.5	0	0	0	0	0	0	0	0	0	0	0	0	0
1016.5	0	0	0	0	0	0	0	0	0	0	0	0	0
1017.5	0	0	0	0	0	0	0	0	0	0	0	0	0
1018.5	0	0	0	0	0	0	0	0	0	0	0	0	0
1019.5	0	0	0	0	0	0	0	0	0	0	0	0	0
1020.5	0	0	0	0	0	0	0	0	0	0	0	0	0
1021.5	0	0	0	0	0	0	0	0	0	0	0	0	0
1022.5	0	0	0	0	0	0	0	0	0	0	0	0	0
1023.5	0	0	0	0	0	0	0	0	0	0	0	0	0
1024.5	0	0	0	0	0	0	0	0	0	0	0	0	0
1025.5	0	0	0	0	0	0	0	0	0	0	0	0	0
1026.5	0	0	0	0	0	0	0	0	0	0	0	0	0
1027.5	0	0	0	0	0	0	0	0	0	0	0	0	0
1028.5	0	0	0	0	0	0	0	0	0	0	0	0	0
1029.5	0	0	0	0	0	0	0	0	0	0	0	0	0
1030.5	0	0	0	0	0	0	0	0	0	0	0	0	0
1031.5	0	0	0	0	0	0	0	0	0	0	0	0	0
1032.5	0	0	0	0	0	0	0	0	0	0	0	0	0
1033.5	0	0	0	0	0	0	0	0	0	0	0	0	0
1034.5	0	0	0	0	0	0	0	0	0	0	0	0	0
1035.5	0	0	0	0	0	0	0	0	0	0	0	0	0
1036.5	0	0	0	0	0	0	0	0	0	0	0	0	0
1037.5	0	0	0	0	0	0	0	0	0	0	0	0	0
1038.5	0	0	0	0	0	0	0	0	0	0	0	0	0
1039.5	0	0	0	0	0	0	0	0	0	0	0	0	0
1040.5	0	0	1	0	0	0	0	0	0	0.111111	0.117851	0.228962	-0.00674002
1041.5	0	0	0	0	0	0	0	0	0	0	0	0	0
1042.5	0	0	0	0	0	0	0	0	0	0	0	0	0
1043.5	0	0	0	0	0	0	0	0	0	0	0	0	0
1044.5	0	0	0	0	0	0	0	0	0	0	0	0	0
1045.5	0	0	0	0	0	0	0	0	0	0	0	0	0
1046.5	0	0	0	0	0	0	0	0	0	0	0	0	0
1047.5	0	0	0	0	0	0	0	0	0	0	0	0	0
1048.5	0	0	0	0	0	0	0	0	0	0	0	0	0
1049.5	0	0	0	0	0	0	0	0	0	0	0	0	0
1050.5	0	0	0	0	0	0	0	0	0	0	0	0	0
1051.5	0	0	0	0	0	0	0	0	0	0	0	0	0
1052.5	0	0	0	0	0	0	0	0	0	0	0	0	0
1053.5	0	0	0	0	0	0	0	0	0	0	0	0	0
1054.5	0	0	0	0	0	0	0	0	0	0	0	0	0
1055.5	0	0	0	0	0	0	0	0	0	0	0	0	0
1056.5	0	0	0	0	0	0	0	0	0	0	0	0	0
1057.5	0	0	0	0	0	0	0	0	0	0	0	0	0
1058.5	0	0	0	0	0	0	0	0	0	0	0	0	0
1059.5	0	0	0	0	0	0	0	0	0	0	0	0	0
1060.5	0	0	0	0	0	0	0	0	0	0	0	0	0
1061.5	0	0	0	0	0	0	0	0	0	0	0	0	0
1062.5	0	0	0	0	0	0	0	0	0	0	0	0	0
1063.5	0	0	0	0	0	0	0	0	0	0	0	0	0
1064.5	0	0	0	0	0	0	0	0	0	0	0	0	0
1065.5	0	0	0	0	0	0	0	0	0	0	0	0	0
1066.5	0	0	0	0	0	0	0	0	0	0	0	0	0
1067.5	0	0	0	0	0	0	0	0	0	0	0	0	0
1068.5	0	0	0	0	0	0	0	0	0	0	0	0	0
1069.5	0	0	0	0	0	0	0	0	0	0	0	0	0
1070.5	0	0	0	0	0	0	0	0	0	0	0	0	0
1071.5	0	0	0	0	0	0	0	0	0	0	0	0	0
1072.5	0	0	0	0	0	0	0	0	0	0	0	0	0
1073.5	0	0	0	0	0	0	0	0	0	0	0	0	0
1074.5	0	0	0	0	0	0	0	0	0	0	0	0	0
1075.5	0	0	0	0	0	0	0	0	0	0	0	0	0
1076.5	0	0	0	0	0	0	0	0	0	0	0	0	0
1077.5	0	0	0	0	0	0	0	0	0	0	0	0	0
1078.5	0	0	0	0	0	0	0	0	0	0	0	0	0
1079.5	0	0	0	0	0	0	0	0	0	0	0	0	0
1080.5	0	0	0	0	0	0	0	0	0	0	0	0	0
1081.5	0	0	0	0	0	0	0	0	0	0	0	0	0
1082.5	0	0	0	0	0	0	0	0	0	0	0	0	0
1083.5	0	0	0	0	0	0	0	0	0	0	0	0	0
1084.5	0	0	0	0	0	0	0	0	0	0	0	0	0
1085.5	0	0	0	0	0	0	0	0	0	0	0	0	0
1086.5	0	0	0	0	0	0	0	0	0	0	0	0	0
1087.5	0	0	0	0	0	0	0	0	0	0	0	0	0
1088.5	0	0	0	0	0	0	0	0	0	0	0	0	0
1089.5	0	0	0	0	0	0	0	0	0	0	0	0	0
1090.5	0	0	0	0	0	0	0	0	0	0	0	0	0
1091.5	0	0	0	0	0	0	0	0	0	0	0	0	0
1092.5	0	0	0	0	0	0	0	0	0	0	0	0	0
1093.5	0	0	0	0	0	0	0	0	0	0	0	0	0
1094.5	0	0	0	0	0	0	0	0	0	0	0	0	0
1095.5	0	0	0	0	0	0	0	0	0	0	0	0	0
1096.5	0	0	0	0	0	0	0	0	0	0	0	0	0
1097.5	0	0	0	0	0	0	0	0	0	0	0	0	0
1098.5	0	0	0	0	0	0	0	0	0	0	0	0	0
1099.5	0	0	0	0	0	0	0	0	0	0	0	0	0
1100.5	0	0	0	0	0	0	0	0	0	0	0	0	0
1101.5	0	0	0	0	0	0	0	0	0	0	0	0	0
1102.5	0	0	0	0	0	0	0	0	0	0	0	0	0
1103.5	0	0	0	0	0	0	0	0	0	0	0	0	0
1104.5	0	0	0	0	0	0	0	0	0	0	0	0	0
1105.5	0	0	0	0	0	0	0	0	0	0	0	0	0
1106.5	0	0	0	0	0	0	0	0	0	0	0	0	0
1107.5	0	0	0	0	0	0	0	0	0	0	0	0	0
1108.5	0	0	0	0	0	0	0	0	0	0	0	0	0
1109.5	0	0	0	0	0	0	0	0	0	0	0	0	0
1110.5	0	0	0	0	0	0	0	0	0	0	0	0	0
1111.5	0	0	0	0	0	0	0	0	0	0	0	0	0
1112.5	0	0	0	0	0	0	0	0	0	0	0	0	0
1113.5	0	0	0	0	0	0	0	0	0	0	0	0	0
1114.5	0	0	0	0	0	0	0	0	0	0	0	0	0
1115.5	0	0	0	0	0	0	0	0	0	0	0	0	0
1116.5	0	0	0	0	0	0	0	0	0	0	0	0	0
1117.5	0	0	0	0	0	0	0	0	0	0	0	0	0
1118.5	0	0	0	0	0	0	0	0	0	0	0	0	0
1119.5	0	0	0	0	0	0	0	0	0	0	0	0	0
1120.5	0	0	0	0	0	0	0	0	0	0	0	0	0
1121.5	0	0	0	0	0	0	0	0	0	0	0	0	0
1122.5	0	0	0	0	0	0	0	0	0	0	0	0	0
1123.5	0	0	0	0	0	0	0	0	0	0	0	0	0
1124.5	0	0	0	0	0	0	0	0	0	0	0	0	0
1125.5	0	0	0	0	0	0	0	0	0	0	0	0	0
1126.5	0	0	0	0	0	0	0	0	0	0	0	0	0
1127.5	0	0	0	0	0	0	0	0	0	0	0	0	0
1128.5	0	0	0	0	0	0	0	0	0	0	0	0	0
1129.5	0	0	0	0	0	0	0	0	0	0	0	0	0
1130.5	0	0	0	0	0	0	0	0	0	0	0	0	0
1131.5	0	0	0	0	0	0	0	0	0	0	0	0	0
1132.5	0	0	0	0	0	0	0	0	0	0	0	0	0
1133.5	0	0	0	0	0	0	0	0	0	0	0	0	0
1134.5	0	0	0	0	0	0	0	0	0	0	0	0	0
1135.5	0	0	0	0	0	0	0	0	0	0	0	0	0
1136.5	0	0	0	0	0	0	0	0	0	0	0	0	0
1137.5	0	0	0	0	0	0	0	0	0	0	0	0	0
1138.5	0	0	0	0	0	0	0	0	0	0	0	0	0
1139.5	0	0	0	0	0	0	0	0	0	0	0	0	0
1140.5	0	0	0	0	0	0	0	0	0	0	0	0	0
1141.5	0	0	0	0	0	0	0	0	0	0	0	0	0
1142.5	0	0	0	0	0	0	0	0	0	0	0	0	0
1143.5	0	0	0	0	0	0	0	0	0	0	0	0	0
1144.5	0	0	0	0	0	0	0	0	0	0	0	0	0
1145.5	0	0	0	0	0	0	0	0	0	0	0	0	0
1146.5	0	0	0	0	0	0	0	0	0	0	0	0	0
1147.5	0	0	0	0	0	0	0	0	0	0	0	0	0
1148.5	0	0	0	0	0	0	0	0	0	0	0	0	0
1149.5	0	0	0	0	0	0	0	0	0	0	0	0	0
1150.5	0	0	0	0	0	0	0	0	0	0	0	0	0
1151.5	0	0	0	0	0	0	0	0	0	0	0	0	0
1152.5	0	0	0	0	0	0	0	0	0	0	0	0	0
1153.5	0	0	0	0	0	0	0	0	0	0	0	0	0
1154.5	0	0	0	0	0	0	0	0	0	0	0	0	0
1155.5	0	0	0	0	0	0	0	0	0	0	0	0	0
1156.5	0	0	0	0	0	0	0	0	0	0	0	0	0
1157.5	0	0	0	0	0	0	0	0	0	0	0	0	0
1158.5	0	0	0	0	0	0	0	0	0	0	0	0	0
1159.5	0	0	0	0	0	0	0	0	0	0	0	0	0
1160.5	0	0	0	0	0	0	0	0	0	0	0	0	0
1161.5	0	0	0	0	0	0	0	0	0	0	0	0	0
1162.5	0	0	0	0	0	0	0	0	0	0	0	0	0
1163.5	0	0	0	0	0	0	0	0	0	0	0	0	0
1164.5	0	0	0	0	0	0	0	0	0	0	0	0	0
1165.5	0	0	0	0	0	0	0	0	0	0	0	0	0
1166.5	0	0	0	0	0	0	0	0	0	0	0	0	0
1167.5	0	0	0	0	0	0	0	0	0	0	0	0	0
1168.5	0	0	0	0	0	0	0	0	0	0	0	0	0
1169.5	0	0	0	0	0	0	0	0	0	0	0	0	0
1170.5	0	0	0	0	0	0	0	0	0	0	0	0	0
1171.5	0	0	0	0	0	0	0	0	0	0	0	0	0
1172.5	0	0	0	0	0	0	0	0	0	0	0	0	0
1173.5	0	0	0	0	0	0	0	0	0	0	0	0	0
1174.5	0	0	0	0	0	0	0	0	0	0	0	0	0
1175.5	0	0	0	0	0	0	0	0	0	0	0	0	0
1176.5	0	0	0	0	0	0	0	0	0	0	0	0	0
1177.5	0	0	0	0	0	0	0	0	0	0	0	0	0
1178.5	0	0	0	0	0	0	0	0	0	0	0	0	0
1179.5	0	0	0	0	0	0	0	0	0	0	0	0	0
1180.5	0	0	0	0	0	0	0	0	0	0	0	0	0
1181.5	0	0	0	0	0	0	0	0	0	0	0	0	0
1182.5	0	0	0	0	0	0	0	0	0	0	0	0	0
1183.5	0	0	0	0	0	0	0	0	0	0	0	0	0
1184.5	0	0	0	0	0	0	0	0	0	0	0	0	0
1185.5	0	0	0	0	0	0	0	0	0	0	0	0	0
1186.5	0	0	0	0	0	0	0	0	0	0	0	0	0
1187.5	0	0	0	0	0	0	0	0	0	0	0	0	0
1188.5	0	0	0	0	0	0	0	0	0	0	0	0	0
1189.5	0	0	0	0	0	0	0	0	0	0	0	0	0
1190.5	0	0	0	0	0	0	0	0	0	0	0	0	0
1191.5	0	0	0	0	0	0	0	0	0	0	0	0	0
1192.5	0	0	0	0	0	0	0	0	0	0	0	0	0
1193.5	0	0	0	0	0	0	0	0	0	0	0	0	0
1194.5	0	0	0	0	0	0	0	0	0	0	0	0	0
1195.5	0	0	0	0	0	0	0	0	0	0	0	0	0
1196.5	0	0	0	0	0	0	0	0	0	0	0	0	0
1197.5	0	0	0	0	0	0	0	0	0	0	0	0	0
1198.5	0	0	0	0	0	0	0	0	0	0	0	0	0
1199.5	0	0	0	0	0	0	0	0	0	0	0	0	0
1200.5	0	0	0	0	0	0	0	0	0	0	0	0	0
1201.5	0	0	0	0	0	0	0	0	0	0	0	0	0
1202.5	0	0	0	0	0	0	0	0	0	0	0	0	0
1203.5	0	0	0	0	0	0	0	0	0	0	0	0	0
1204.5	0	0	0	0	0	0	0	0	0	0	0	0	0
1205.5	0	0	0	0	0	0	0	0	0	0	0	0	0
1206.5	0	0	0	0	0	0	0	0	0	0	0	0	0
1207.5	0	0	0	0	0	0	0	0	0	0	0	0	0
1208.5	0	0	0	0	0	0	0	0	0	0	0	0	0
1209.5	0	0	0	0	0	0	0	0	0	0	0	0	0
1210.5	0	0	0	0	0	0	0	0	0	0	0	0	0
1211.5	0	0	0	0	0	0	0	0	0	0	0	0	0
1212.5	0	0	0	0	0	0	0	0	0	0	0	0	0
1213.5	0	0	0	0	0	0	0	0	0	0	0	0	0
1214.5	0	0	0	0	0	0	0	0	0	0	0	0	0
1215.5	0	0	0	0	0	0	0	0	0	0	0	0	0
1216.5	0	0	0	0	0	0	0	0	0	0	0	0	0
1217.5	0	0	0	0	0	0	0	0	0	0	0	0	0
1218.5	0	0	0	0	0	0	0	0	0	0	0	0	0
1219.5	0	0	0	0	0	0	0	0	0	0	0	0	0
1220.5	0	0	0	0	0	0	0	0	0	0	0	0	0
1221.5	0	0	0	0	0	0	0	0	0	0	0	0	0
1222.5	0	0	0	0	0	0	0	0	0	0	0	0	0
1223.5	0	0	0	0	0	0	0	0	0	0	0	0	0
1224.5	0	0	0	0	0	0	0	0	0	0	0	0	0
1225.5	0	0	0	0	0	0	0	0	0	0	0	0	0
1226.5	0	0	0	0	0	0	0	0	0	0	0	0	0
1227.5	0	0	0	0	0	0	0	0	0	0	0	0	0
1228.5	0	0	0	0	0	0	0	0	0	0	0	0	0
1229.5	0	0	0	0	0	0	0	0	0	0	0	0	0
1230.5	0	0	0	0	0	0	0	0	0	0	0	0	0
1231.5	0	0	0	0	0	0	0	0	0	0	0	0	0
1232.5	0	0	0	0	0	0	0	0	0	0	0	0	0
1233.5	0	0	0	0	0	0	0	0	0	0	0	0	0
1234.5	0	0	0	0	0	0	0	0	0	0	0	0	0
1235.5	0	0	0	0	0	0	0	0	0	0	0	0	0
1236.5	0	0	0	0	0	0	0	0	0	0	0	0	0
1237.5	0	0	0	0	0	0	0	0	0	0	0	0	0
1238.5	0	0	0	0	0	0	0	0	0	0	0	0	0
1239.5	0	0	0	0	0	0	0	0	0	0	0	0	0
1240.5	0	0	0	0	0	0	0	0	0	0	0	0	0
1241.5	0	0	0	0	0	0	0	0	0	0	0	0	0
1242.5	0	0	0	0	0	0	0	0	0	0	0	0	0
1243.5	0	0	0	0	0	0	0	0	0	0	0	0	0
1244.5	0	0	0	0	0	0	0	0	0	0	0	0	0
1245.5	0	0	0	0	0	0	0	0	0	0	0	0	0
1246.5	0	0	0	0	0	0	0	0	0	0	0	0	0
1247.5	0	0	0	0	0	0	0	0	0	0	0	0	0
1248.5	0	0	0	0	0	0	0	0	0	0	0	0	0
1249.5	0	0	0	0	0	0	0	0	0	0	0	0	0
1250.5	0	0	0	0	0	0	0	0	0	0	0	0	0
1251.5	0	0	0	0	0	0	0	0	0	0	0	0	0
1252.5	0	0	0	0	0	0	0	0	0	0	0	0	0
1253.5	0	0	0	0	0	0	0	0	0	0	0	0	0
1254.5	0	0	0	0	0	0	0	0	0	0	0	0	0
1255.5	0	0	0	0	0	0	0	0	0	0	0	0	0
1256.5	0	0	0	0	0	0	0	0	0	0	0	0	0
1257.5	0	0	0	0	0	0	0	0	0	0	0	0	0
1258.5	0	0	0	0	0	0	0	0	0	0	0	0	0
1259.5	0	0	0	0	0	0	0	0	0	0	0	0	0
1260.5	0	0	0	0	0	0	0	0	0	0	0	0	0
1261.5	0	0	0	0	0	0	0	0	0	0	0	0	0
1262.5	0	0	0	0	0	0	0	0	0	0	0	0	0
1263.5	0	0	0	0	0	0	0	0	0	0	0	0	0
1264.5	0	0	0	0	0	0	0	0	0	0	0	0	0
1265.5	0	0	0	0	0	0	0	0	0	0	0	0	0
1266.5	0	0	0	0	0	0	0	0	0	0	0	0	0
1267.5	0	0	0	0	0	0	0	0	0	0	0	0	0
1268.5	0	0	0	0	0	0	0	0	0	0	0	0	0
1269.5	0	0	0	0	0	0	0	0	0	0	0	0	0
1270.5	0	0	0	0	0	0	0	0	0	0	0	0	0
1271.5	0	0	0	0	0	0	0	0	0	0	0	0	0
1272.5	0	0	0	0	0	0	0	0	0	0	0	0	0
1273.5	0	0	0	0	0	0	0	0	0	0	0	0	0
1274.5	0	0	0	0	0	0	0	0	0	0	0	0	0
1275.5	0	0	0	0	0	0	0	0	0	0	0	0	0
1276.5	0	0	0	0	0	0	0	0	0	0	0	0	0
1277.5	0	0	0	0	0	0	0	0	0	0	0	0	0
1278.5	0	0	0	0	0	0	0	0	0	0	0	0	0
1279.5	0	0	0	0	0	0	0	0	0	0	0	0	0
1280.5	0	0	0	0	0	0	0	0	0	0	0	0	0
1281.5	0	0	0	0	0	0	0	0	0	0	0	0	0
1282.5	0	0	0	0	0	0	0	0	0	0	0	0	0
1283.5	0	0	0	0	0	0	0	0	0	0	0	0	0
1284.5	0	0	0	0	0	0	0	0	0	0	0	0	0
1285.5	0	0	0	0	0	0	0	0	0	0	0	0	0
1286.5	0	0	0	0	0	0	0	0	0	0	0	0	0
1287.5	0	0	0	0	0	0	0	0	0	0	0	0	0
1288.5	0	0	0	0	0	0	0	0	0	0	0	0	0
1289.5	0	0	0	0	0	0	0	0	0	0	0	0	0
1290.5	0	0	0	0	0	0	0	0	0	0	0	0	0
1291.5	0	0	0	0	0	0	0	0	0	0	0	0	0
1292.5	0	0	0	0	0	0	0	0	0	0	0	0	0
1293.5	0	0	0	0	0	0	0	0	0	0	0	0	0
1294.5	0	0	0	0	0	0	0	0	0	0	0	0	0
1295.5	0	0	0	0	0	0	0	0	0	0	0	0	0
1296.5	0	0	0	0	0	0	0	0	0	0	0	0	0
1297.5	0	0	0	0	0	0	0	0	0	0	0	0	0
1298.5	0	0	0	0	0	0	0	0	0	0	0	0	0
1299.5	0	0	0	0	0	0	0	0	0	0	0	0	0
1300.5	0	0	0	0	0	0	0	0	0	0	0	0	0
1301.5	0	0	0	0	0	0	0	0	0	0	0	0	0
1302.5	0	0	0	0	0	0	0	0	0	0	0	0	0
1303.5	0	0	0	0	0	0	0	0	0	0	0	0	0
1304.5	0	0	0	0	0	0	0	0	0	0	0	0	0
1305.5	0	0	0	0	0	0	0	0	0	0	0	0	0
1306.5	0	0	0	0	0	0	0	0	0	0	0	0	0
1307.5	0	0	0	0	0	0	0	0	0	0	0	0	0
1308.5	0	0	0	0	0	0	0	0	0	0	0	0	0
1309.5	0	0	0	0	0	0	0	0	0	0	0	0	0
1310.5	0	0	0	0	0	0	0	0	0	0	0	0	0
1311.5	0	0	0	0	0	0	0	0	0	0	0	0	0
1312.5	0	0	0	0	0	0	0	0	0	0	0	0	0
1313.5	0	0	0	0	0	0	0	0	0	0	0	0	0
1314.5	0	0	0	0	0	0	0	0	0	0	0	0	0
1315.5	0	0	0	0	0	0	0	0	0	0	0	0	0
1316.5	0	0	0	0	0	0	0	0	0	0	0	0	0
1317.5	0	0	0	0	0	0	0	0	0	0	0	0	0
1318.5	0	0	0	0	0	0	0	0	0	0	0	0	0
1319.5	0	0	0	0	0	0	0	0	0	0	0	0	0
1320.5	0	0	0	0	0	0	0	0	0	0	0	0	0
1321.5	0	0	0	0	0	0	0	0	0	0	0	0	0
1322.5	0	0	0	0	0	0	0	0	0	0	0	0	0
1323.5	0	0	0	0	0	0	0	0	0	0	0	0	0
1324.5	0	0	0	0	0	0	0	0	0	0	0	0	0
1325.5	0	0	0	0	0	0	0	0	0	0	0	0	0
1326.5	0	0	0	0	0	0	0	0	0	0	0	0	0
1327.5	0	0	0	0	0	0	0	0	0	0	0	0	0
1328.5	0	0	0	0	0	0	0	0	0	0	0	0	0
1329.5	0	0	0	0	0	0	0	0	0	0	0	0	0
1330.5	0	0	0	0	0	0	0	0	0	0	0	0	0
1331.5	0	0	0	0	0	0	0	0	0	0	0	0	0
1332.5	0	0	0	0	0	0	0	0	0	0	0	0	0
1333.5	0	0	0	0	0	0	0	0	0	0	0	0	0
1334.5	0	0	0	0	0	0	0	0	0	0	0	0	0
1335.5	0	0	0	0	0	0	0	0	0	0	0	0	0
1336.5	0	0	0	0	0	0	0	0	0	0	0	0	0
1337.5	0	0	0	0	0	0	0	0	0	0	0	0	0
1338.5	0	0	0	0	0	0	0	0	0	0	0	0	0
1339.5	0	0	0	0	0	0	0	0	0	0	0	0	0
1340.5	0	0	0	0	0	0	0	0	0	0	0	0	0
1341.5	0	0	0	0	0	0	0	0	0	0	0	0	0
1342.5	0	0	0	0	0	0	0	0	0	0	0	0	0
1343.5	0	0	0	0	0	0	0	0	0	0	0	0	0
1344.5	0	0	0	0	0	0	0	0	0	0	0	0	0
1345.5	0	0	0	0	0	0	0	0	0	0	0	0	0
1346.5	0	0	0	0	0	0	0	0	0	0	0	0	0
1347.5	0	0	0	0	0	0	0	0	0	0	0	0	0
1348.5	0	0	0	0	0	0	0	0	0	0	0	0	0
1349.5	0	0	0	0	0	0	0	0	0	0	0	0	0
1350.5	0	0	0	0	0	0	0	0	0	0	0	0	0
1351.5	0	0	0	0	0	0	0	0	0	0	0	0	0
1352.5	0	0	0	0	0	0	0	0	0	0	0	0	0
1353.5	0	0	0	0	0	0	0	0	0	0	0	0	0
1354.5	0	0	0	0	0	0	0	0	0	0	0	0	0
1355.5	0	0	0	0	0	0	0	0	0	0	0	0	0
1356.5	0	0	0	0	0	0	0	0	0	0	0	0	0
1357.5	0	0	0	0	0	0	0	0	0	0	0	0	0
1358.5	0	0	0	0	0	0	0	0	0	0	0	0	0
1359.5	0	0	0	0	0	0	0	0	0	0	0	0	0
1360.5	0	0	0	0	0	0	0	0	0	0	0	0	0
1361.5	0	0	0	0	0	0	0	0	0	0	0	0	0
1362.5	0	0	0	0	0	0	0	0	0	0	0	0	0
1363.5	0	0	0	0	0	0	0	0	0	0	0	0	0
1364.5	0	0	0	0	0	0	0	0	0	0	0	0	0
1365.5	0	0	0	0	0	0	0	0	0	0	0	0	0
1366.5	0	0	0	0	0	0	0	0	0	0	0	0	0
1367.5	0	0	0	0	0	0	0	0	0	0	0	0	0
1368.5	0	0	0	0	0	0	0	0	0	0	0	0	0
1369.5	0	0	0	0	0	0	0	0	0	0	0	0	0
1370.5	0	0	0	0	0	0	0	0	0	0	0	0	0
1371.5	0	0	0	0	0	0	0	0	0	0	0	0	0
1372.5	0	0	0	0	0	0	0	0	0	0	0	0	0
1373.5	0	0	0	0	0	0	0	0	0	0	0	0	0
1374.5	0	0	0	0	0	0	0	0	0	0	0	0	0
1375.5	0	0	0	0	0	0	0	0	0	0	0	0	0
1376.5	0	0	0	0	0	0	0	0	0	0	0	0	0
1377.5	0	0	0	0	0	0	0	0	0	0	0	0	0
1378.5	0	0	0	0	0	0	0	0	0	0	0	0	0
1379.5	0	0	0	0	0	0	0	0	0	0	0	0	0
1380.5	0	0	0	0	0	0	0	0	0	0	0	0	0
1381.5	0	0	0	0	0	0	0	0	0	0	0	0	0
1382.5	0	0	0	0	0	0	0	0	0	0	0	0	0
1383.5	0	0	0	0	0	0	0	0	0	0	0	0	0
1384.5	0	0	0	0	0	0	0	0	0	0	0	0	0
1385.5	0	0	0	0	0	0	0	0	0	0	0	0	0
1386.5	0	0	0	0	0	0	0	0	0	0	0	0	0
1387.5	0	0	0	0	0	0	0	0	0	0	0	0	0
1388.5	0	0	0	0	0	0	0	0	0	0	0	0	0
1389.5	0	0	0	0	0	0	0	0	0	0	0	0	0
1390.5	0	0	0	0	0	0	0	0	0	0	0	0	0
1391.5	0	0	0	0	0	0	0	0	0	0	0	0	0
1392.5	0	0	0	0	0	0	0	0	0	0	0	0	0
1393.5	0	0	0	0	0	0	0	0	0	0	0	0	0
1394.5	0	0	0	0	0	0	0	0	0	0	0	0	0
1395.5	0	0	0	0	0	0	0	0	0	0	0	0	0
1396.5	0	0	0	0	0	0	0	0	0	0	0	0	0
1397.5	0	0	0	0	0	0	0	0	0	0	0	0	0
1398.5	0	0	0	0	0	0	0	0	0	0	0	0	0
1399.5	0	0	0	0	0	0	0	0	0	0	0	0	0
1400.5	0	0	0	0	0	0	0	0	0	0	0	0	0
1401.5	0	0	0	0	0	0	0	0	0	0	0	0	0
1402.5	0	0	0	0	0	0	0	0	0	0	0	0	0
1403.5	0	0	0	0	0	0	0	0	0	0	0	0	0
1404.5	0	0	0	0	0	0	0	0	0	0	0	0	0
1405.5	0	0	0	0	0	0	0	0	0	0	0	0	0
1406.5	0	0	0	0	0	0	0	0	0	0	0	0	0
1407.5	0	0	0	0	0	0	0	0	0	0	0	0	0
1408.5	0	0	0	0	0	0	0	0	0	0	0	0	0
1409.5	0	0	0	0	0	0	0	0	0	0	0	0	0
1410.5	0	0	0	0	0	0	0	0	0	0	0	0	0
1411.5	0	0	0	0	0	0	0	0	0	0	0	0	0
1412.5	0	0	0	0	0	0	0	0	0	0	0	0	0
1413.5	0	0	0	0	0	0	0	0	0	0	0	0	0
1414.5	0	0	0	0	0	0	0	0	0	0	0	0	0
1415.5	0	0	0	0	0	0	0	0	0	0	0	0	0
1416.5	0	0	0	0	0	0	0	0	0	0	0	0	0
1417.5	0	0	0	0	0	0	0	0	0	0	0	0	0
1418.5	0	0	0	0	0	0	0	0	0	0	0	0	0
1419.5	0	0	0	0	0	0	0	0	0	0	0	0	0
1420.5	0	0	0	0	0	0	0	0	0	0	0	0	0
1421.5	0	0	0	0	0	0	0	0	0	0	0	0	0
1422.5	0	0	0	0	0	0	0	0	0	0	0	0	0
1423.5	0	0	0	0	0	0	0	0	0	0	0	0	0
1424.5	0	0	0	0	0	0	0	0	0	0	0	0	0
1425.5	0	0	0	0	0	0	0	0	0	0	0	0	0
1426.5	0	0	0	0	0	0	0	0	0	0	0	0	0
1427.5	0	0	0	0	0	0	0	0	0	0	0	0	0
1428.5	0	0	0	0	0	0	0	0	0	0	0	0	0
1429.5	0	0	0	0	0	0	0	0	0	0	0	0	0
1430.5	0	0	0	0	0	0	0	0	0	0	0	0	0
1431.5	0	0	0	0	0	0	0	0	0	0	0	0	0
1432.5	0	0	0	0	0	0	0	0	0	0	0	0	0
1433.5	0	0	0	0	0	0	0	0	0	0	0	0	0
1434.5	0	0	0	0	0	0	0	0	0	0	0	0	0
1435.5	0	0	0	0	0	0	0	0	0	0	0	0	0
1436.5	0	0	0	0	0	0	0	0	0	0	0	0	0
1437.5	0	0	0	0	0	0	0	0	0	0	0	0	0
1438.5	0	0	0	0	0	0	0	0	0	0	0	0	0
1439.5	0	0	0	0	0	0	0	0	0	0	0	0	0
1440.5	0	0	0	0	0	0	0	0	0	0	0	0	0
1441.5	0	0	0	0	0	0	0	0	0	0	0	0	0
1442.5	0	0	0	0	0	0	0	0	0	0	0	0	0
1443.5	0	0	0	0	0	0	0	0	0	0	0	0	0
1444.5	0	0	0	0	0	0	0	0	0	0	0	0	0
1445.5	0	0	0	0	0	0	0	0	0	0	0	0	0
1446.5	0	0	0	0	0	0	0	0	0	0	0	0	0
1447.5	0	0	0	0	0	0	0	0	0	0	0	0	0
1448.5	0	0	0	0	0	0	0	0	0	0	0	0	0
1449.5	0	0	0	0	0	0	0	0	0	0	0	0	0
1450.5	0	0	0	0	0	0	0	0	0	0	0	0	0
1451.5	0	0	0	0	0	0	0	0	0	0	0	0	0
1452.5	0	0	0	0	0	0	0	0	0	0	0	0	0
1453.5	0	0	0	0	0	0	0	0	0	0	0	0	0
1454.5	0	0	0	0	0	0	0	0	0	0	0	0	0
1455.5	0	0	0	0	0	0	0	0	0	0	0	0	0
1456.5	0	0	0	0	0	0	0	0	0	0	0	0	0
1457.5	0	0	0	0	0	0	0	0	0	0	0	0	0
1458.5	0	0	0	0	0	0	0	0	0	0	0	0	0
1459.5	0	0	0	0	0	0	0	0	0	0	0	0	0
1460.5	0	0	0	0	0	0	0	0	0	0	0	0	0
1461.5	0	0	0	0	0	0	0	0	0	0	0	0	0
1462.5	0	0	0	0	0	0	0	0	0	0	0	0	0
1463.5	0	0	0	0	0	0	0	0	0	0	0	0	0
1464.5	0	0	0	0	0	0	0	0	0	0	0	0	0
1465.5	0	0	0	0	0	0	0	0	0	0	0	0	0
1466.5	0	0	0	0	0	0	0	0	0	0	0	0	0
1467.5	0	0	0	0	0	0	0	0	0	0	0	0	0
1468.5	0	0	0	0	0	0	0	0	0	0	0	0	0
1469.5	0	0	0	0	0	0	0	0	0	0	0	0	0
1470.5	0	0	0	0	0	0	0	0	0	0	0	0	0
1471.5	0	0	0	0	0	0	0	0	0	0	0	0	0
1472.5	0	0	0	0	0	0	0	0	0	0	0	0	0
1473.5	0	0	0	0	0	0	0	0	0	0	0	0	0
1474.5	0	0	0	0	0	0	0	0	0	0	0	0	0
1475.5	0	0	0	0	0	0	0	0	0	0	0	0	0
1476.5	0	0	0	0	0	0	0	0	0	0	0	0	0
1477.5	0	0	0	0	0	0	0	0	0	0	0	0	0
1478.5	0	0	0	0	0	0	0	0	0	0	0	0	0
1479.5	0	0	0	0	0	0	0	0	0	0	0	0	0
1480.5	0	0	0	0	0	0	0	0	0	0	0	0	0
1481.5	0	0	0	0	0	0	0	0	0	0	0	0	0
1482.5	0	0	0	0	0	0	0	0	0	0	0	0	0
1483.5	0	0	0	0	0	0	0	0	0	0	0	0	0
1484.5	0	0	0	0	0	0	0	0	0	0	0	0	0
1485.5	0	0	0	0	0	0	0	0	0	0	0	0	0
1486.5	0	0	0	0	0	0	0	0	0	0	0	0	0
1487.5	0	0	0	0	0	0	0	0	0	0	0	0	0
1488.5	0	0	0	0	0	0	0	0	0	0	0	0	0
1489.5	0	0	0	0	0	0	0	0	0	0	0	0	0
1490.5	0	0	0	0	0	0	0	0	0	0	0	0	0
1491.5	0	0	0	0	0	0	0	0	0	0	0	0	0
1492.5	0	0	0	0	0	0	0	0	0	0	0	0	0
1493.5	0	0	0	0	0	0	0	0	0	0	0	0	0
1494.5	0	0	0	0	0	0	0	0	0	0	0	0	0
1495.5	0	0	0	0	0	0	0	0	0	0	0	0	0
1496.5	0	0	0	0	0	0	0	0	0	0	0	0	0
1497.5	0	0	0	0	0	0	0	0	0	0	0	0	0
1498.5	0	0	0	0	0	0	0	0	0	0	0	0	0
1499.5	0	0	0	0	0	0	0	0	0	0	0	0	0
1500.5	0	0	0	0	0	0	0	0	0	0	0	0	0
1501.5	0	0	0	0	0	0	0	0	0	0	0	0	0
1502.5	0	0	0	0	0	0	0	0	0	0	0	0	0
1503.5	0	0	0	0	0	0	0	0	0	0	0	0	0
1504.5	0	0	0	0	0	0	0	0	0	0	0	0	0
1505.5	0	0	0	0	0	0	0	0	0	0	0	0	0
1506.5	0	0	0	0	0	0	0	0	0	0	0	0	0
1507.5	0	0	0	0	0	0	0	0	0	0	0	0	0
1508.5	0	0	0	0	0	0	0	0	0	0	0	0	0
1509.5	0	0	0	0	0	0	0	0	0	0	0	0	0
1510.5	0	0	0	0	0	0	0	0	0	0	0	0	0
1511.5	0	0	0	0	0	0	0	0	0	0	0	0	0
1512.5	0	0	0	0	0	0	0	0	0	0	0	0	0
1513.5	0	0	0	0	0	0	0	0	0	0	0	0	0
1514.5	0	0	0	0	0	0	0	0	0	0	0	0	0
1515.5	0	0	0	0	0	0	0	0	0	0	0	0	0
1516.5	0	0	0	0	0	0	0	0	0	0	0	0	0
1517.5	0	0	0	0	0	0	0	0	0	0	0	0	0
1518.5	0	0	0	0	0	0	0	0	0	0	0	0	0
1519.5	0	0	0	0	0	0	0	0	0	0	0	0	0
1520.5	0	0	0	0	0	0	0	0	0	0	0	0	0
1521.5	0	0	0	0	0	0	0	0	0	0	0	0	0
1522.5	0	0	0	0	0	0	0	0	0	0	0	0	0
1523.5	0	0	0	0	0	0	0	0	0	0	0	0	0
1524.5	0	0	0	0	0	0	0	0	0	0	0	0	0
1525.5	0	0	0	0	0	0	0	0	0	0	0	0	0
1526.5	0	0	0	0	0	0	0	0	0	0	0	0	0
1527.5	0	0	0	0	0	0	0	0	0	0	0	0	0
1528.5	0	0	0	0	0	0	0	0	0	0	0	0	0
1529.5	0	0	0	0	0	0	0	0	0	0	0	0	0
1530.5	0	0	0	0	0	0	0	0	0	0	0	0	0
1531.5	0	0	0	0	0	0	0	0	0	0	0	0	0
1532.5	0	0	0	0	0	0	0	0	0	0	0	0	0
1533.5	0	0	0	0	0	0	0	0	0	0	0	0	0
1534.5	0	0	0	0	0	0	0	0	0	0	0	0	0
1535.5	0	0	0	0	0	0	0	0	0	0	0	0	0
1536.5	0	0	0	0	0	0	0	0	0	0	0	0	0
1537.5	0	0	0	0	0	0	0	0	0	0	0	0	0
1538.5	0	0	0	0	0	0	0	0	0	0	0	0	0
1539.5	0	0	0	0	0	0	0	0	0	0	0	0	0
1540.5	0	0	0	0	0	0	0	0	0	0	0	0	0
1541.5	0	0	0	0	0	0	0	0	0	0	0	0	0
1542.5	0	0	0	0	0	0	0	0	0	0	0	0	0
1543.5	0	0	0	0	0	0	0	0	0	0	0	0	0
1544.5	0	0	0	0	0	0	0	0	0	0	0	0	0
1545.5	0	0	0	0	0	0	0	0	0	0	0	0	0
1546.5	0	0	0	0	0	0	0	0	0	0	0	0	0
1547.5	0	0	0	0	0	0	0	0	0	0	0	0	0
1548.5	0	0	0	0	0	0	0	0	0	0	0	0	0
1549.5	0	0	0	0	0	0	0	0	0	0	0	0	0
1550.5	0	0	0	0	0	0	0	0	0	0	0	0	0
1551.5	0	0	0	0	0	0	0	0	0	0	0	0	0
1552.5	0	0	0	0	0	0	0	0	0	0	0	0	0
1553.5	0	0	0	0	0	0	0	0	0	0	0	0	0
1554.5	0	0	0	0	0	0	0	0	0	0	0	0	0
1555.5	0	0	0	0	0	0	0	0	0	0	0	0	0
1556.5	0	0	0	0	0	0	0	0	0	0	0	0	0
1557.5	0	0	0	0	0	0	0	0	0	0	0	0	0
1558.5	0	0	0	0	0	0	0	0	0	0	0	0	0
1559.5	0	0	0	0	0	0	0	0	0	0	0	0	0
1560.5	0	0	0	0	0	0	0	0	0	0	0	0	0
1561.5	0	0	0	0	0	0	0	0	0	0	0	0	0
1562.5	0	0	0	0	0	0	0	0	0	0	0	0	0
1563.5	0	0	0	0	0	0	0	0	0	0	0	0	0
1564.5	0	0	0	0	0	0	0	0	0	0	0	0	0
1565.5	0	0	0	0	0	0	0	0	0	0	0	0	0
1566.5	0	0	0	0	0	0	0	0	0	0	0	0	0
1567.5	0	0	0	0	0	0	0	0	0	0	0	0	0
1568.5	0	0	0	0	0	0	0	0	0	0	0	0	0
1569.5	0	0	0	0	0	0	0	0	0	0	0	0	0
1570.5	0	0	0	0	0	0	0	0	0	0	0	0	0
1571.5	0	0	0	0	0	0	0	0	0	0	0	0	0
1572.5	0	0	0	0	0	0	0	0	0	0	0	0	0
1573.5	0	0	0	0	0	0	0	0	0	0	0	0	0
1574.5	0	0	0	0	0	0	0	0	0	0	0	0	0
1575.5	0	0	0	0	0	0	0	0	0	0	0	0	0
1576.5	0	0	0	0	0	0	0	0	0	0	0	0	0
1577.5	0	0	0	0	0	0	0	0	0	0	0	0	0
1578.5	0	0	0	0	0	0	0	0	0	0	0	0	0
1579.5	0	0	0	0	0	0	0	0	0	0	0	0	0
1580.5	0	0	0	0	0	0	0	0	0	0	0	0	0
1581.5	0	0	0	0	0	0	0	0	0	0	0	0	0
1582.5	0	0	0	0	0	0	0	0	0	0	0	0	0
1583.5	0	0	0	0	0	0	0	0	0	0	0	0	0
1584.5	0	0	0	0	0	0	0	0	0	0	0	0	0
1585.5	0	0	0	0	0	0	0	0	0	0	0	0	0
1586.5	0	0	0	0	0	0	0	0	0	0	0	0	0
1587.5	0	0	0	0	0	0	0	0	0	0	0	0	0
1588.5	0	0	0	0	0	0	0	0	0	0	0	0	0
1589.5	0	0	0	0	0	0	0	0	0	0	0	0	0
1590.5	0	0	0	0	0	0	0	0	0	0	0	0	0
1591.5	0	0	0	0	0	0	0	0	0	0	0	0	0
1592.5	0	0	0	0	0	0	0	0	0	0	0	0	0
1593.5	0	0	0	0	0	0	0	0	0	0	0	0	0
1594.5	0	0	0	0	0	0	0	0	0	0	0	0	0
1595.5	0	0	0	0	0	0	0	0	0	0	0	0	0
1596.5	0	0	0	0	0	0	0	0	0	0	0	0	0
1597.5	0	0	0	0	0	0	0	0	0	0	0	0	0
1598.5	0	0	0	0	0	0	0	0	0	0	0	0	0
1599.5	0	0	0	0	0	0	0	0	0	0	0	0	0
1600.5	0	0	0	0	0	0	0	0	0	0	0	0	0
1601.5	0	0	0	0	0	0	0	0	0	0	0	0	0
1602.5	0	0	0	0	0	0	0	0	0	0	0	0	0
1603.5	0	0	0	0	0	0	0	0	0	0	0	0	0
1604.5	0	0	0	0	0	0	0	0	0	0	0	0	0
1605.5	0	0	0	0	0	0	0	0	0	0	0	0	0
1606.5	0	0	0	0	0	0	0	0	0	0	0	0	0
1607.5	0	0	0	0	0	0	0	0	0	0	0	0	0
1608.5	0	0	0	0	0	0	0	0	0	0	0	0	0
1609.5	0	0	0	0	0	0	0	0	0	0	0	0	0
1610.5	0	0	0	0	0	0	0	0	0	0	0	0	0
1611.5	0	0	0	0	0	0	0	0	0	0	0	0	0
1612.5	0	0	0	0	0	0	0	0	0	0	0	0	0
1613.5	0	0	0	0	0	0	0	0	0	0	0	0	0
1614.5	0	0	0	0	0	0	0	0	0	0	0	0	0
1615.5	0	0	0	0	0	0	0	0	0	0	0	0	0
1616.5	0	0	0	0	0	0	0	0	0	0	0	0	0
1617.5	0	0	0	0	0	0	0	0	0	0	0	0	0
1618.5	0	0	0	0	0	0	0	0	0	0	0	0	0
1619.5	0	0	0	0	0	0	0	0	0	0	0	0	0
1620.5	0	0	0	0	0	0	0	0	0	0	0	0	0
1621.5	0	0	0	0	0	0	0	0	0	0	0	0	0
1622.5	0	0	0	0	0	0	0	0	0	0	0	0	0
1623.5	0	0	0	0	0	0	0	0	0	0	0	0	0
1624.5	0	0	0	0	0	0	0	0	0	0	0	0	0
1625.5	0	0	0	0	0	0	0	0	0	0	0	0	0
1626.5	0	0	0	0	0	0	0	0	0	0	0	0	0
1627.5	0	0	0	0	0	0	0	0	0	0	0	0	0
1628.5	0	0	0	0	0	0	0	0	0	0	0	0	0
1629.5	0	0	0	0	0	0	0	0	0	0	0	0	0
1630.5	0	0	0	0	0	0	0	0	0	0	0	0	0
1631.5	0	0	0	0	0	0	0	0	0	0	0	0	0
1632.5	0	0	0	0	0	0	0	0	0	0	0	0	0
1633.5	0	0	0	0	0	0	0	0	0	0	0	0	0
1634.5	0	0	0	0	0	0	0	0	0	0	0	0	0
1635.5	0	0	0	0	0	0	0	0	0	0	0	0	0
1636.5	0	0	0	0	0	0	0	0	0	0	0	0	0
1637.5	0	0	0	0	0	0	0	0	0	0	0	0	0
1638.5	0	0	0	0	0	0	0	0	0	0	0	0	0
1639.5	0	0	0	0	0	0	0	0	0	0	0	0	0
1640.5	0	0	0	0	0	0	0	0	0	0	0	0	0
1641.5	0	0	0	0	0	0	0	0	0	0	0	0	0
1642.5	0	0	0	0	0	0	0	0	0	0	0	0	0
1643.5	0	0	0	0	0	0	0	0	0	0	0	0	0
1644.5	0	0	0	0	0	0	0	0	0	0	0	0	0
1645.5	0	0	0	0	0	0	0	0	0	0	0	0	0
1646.5	0	0	0	0	0	0	0	0	0	0	0	0	0
1647.5	0	0	0	0	0	0	0	0	0	0	0	0	0
1648.5	0	0	0	0	0	0	0	0	0	0	0	0	0
1649.5	0	0	0	0	0	0	0	0	0	0	0	0	0
1650.5	0	0	0	0	0	0	0	0	0	0	0	0	0
1651.5	0	0	0	0	0	0	0	0	0	0	0	0	0
1652.5	0	0	0	0	0	0	0	0	0	0	0	0	0
1653.5	0	0	0	0	0	0	0	0	0	0	0	0	0
1654.5	0	0	0	0	0	0	0	0	0	0	0	0	0
1655.5	0	0	0	0	0	0	0	0	0	0	0	0	0
1656.5	0	0	0	0	0	0	0	0	0	0	0	0	0
1657.5	0	0	0	0	0	0	0	0	0	0	0	0	0
1658.5	0	0	0	0	0	0	0	0	0	0	0	0	0
1659.5	0	0	0	0	0	0	0	0	0	0	0	0	0
1660.5	0	0	0	0	0	0	0	0	0	0	0	0	0
1661.5	0	0	0	0	0	0	0	0	0	0	0	0	0
1662.5	0	0	0	0	0	0	0		0	0	0	0	0
1663.5	0	0	0	0	0	0	0		0	0	0	0	0
1664.5	0	0	0	0	0	0	0		0	0	0	0	0
1665.5	0	0	0	0	0	0	0		0	0	0	0	0
1666.5	0	0	0	0	0	0	0		0	0	0	0	0
1667.5	0	0	0	0	0	0	0		0	0	0	0	0
1668.5	0	0	0	0	0	0	0		0	0	0	0	0
1669.5	0	0	0	0	0	0	0		0	0	0	0	0
1670.5	0	0	0	0	0	0	0		0	0	0	0	0
1671.5	0	0	0	0	0	0	0		0	0	0	0	0
1672.5	0	0	0	0	0	0	0		0	0	0	0	0
1673.5	0	0	0	0	0	0	0		0	0	0	0	0
1674.5	0	0	0	0	0	0	0		0	0	0	0	0
1675.5	0	0	0	0	0	0	0		0	0	0	0	0
1676.5	0	0	0	0	0	0	0		0	0	0	0	0
1677.5	0	0	0	0	0	0	0		0	0	0	0	0
1678.5	0	0	0	0	0	0	0		0	0	0	0	0
1679.5	0	0	0	0	0	0	0		0	0	0	0	0
1680.5	0	0	0	0	0	0	0		0	0	0	0	0
1681.5	0	0	0	0	0	0	0		0	0	0	0	0
1682.5	0	0	0	0	0	0	0		0	0	0	0	0
1683.5	0	0	0	0	0	0	0		0	0	0	0	0
1684.5	0	0	0	0	0	0	0		0	0	0	0	0
1685.5	0	0	0	0	0	0	0		0	0	0	0	0
1686.5	0	0	0	0	0	0	0		0	0	0	0	0
1687.5	0	0	0	0	0	0	0		0	0	0	0	0
1688.5	0	0	0	0	0	0	0		0	0	0	0	0
1689.5	0	0	0	0	0	0	0		0	0	0	0	0
1690.5	0	0	0	0	0	0	0		0	0	0	0	0
1691.5	0	0	0	0	0	0	0		0	0	0	0	0
1692.5	0	0	0	0	0	0	0		0	0	0	0	0
1693.5	0	0	0	0	0	0	0		0	0	0	0	0
1694.5	0	0	0	0	0	0	0		0	0	0	0	0
1695.5	0	0	0	0	0	0	0		0	0	0	0	0
1696.5	0	0	0	0	0	0	0		0	0	0	0	0
1697.5	0	0	0	0	0	0	0		0	0	0	0	0
1698.5	0	0	0	0	0	0	0		0	0	0	0	0
1699.5	0	0	0	0	0	0	0		0	0	0	0	0
1700.5	0	0	0	0	0	0	0		0	0	0	0	0
1701.5	0	0	0	0	0	0	0		0	0	0	0	0
1702.5	0	0	0	0	0	0	0		0	0	0	0	0
1703.5	0	0	0	0	0	0	0		0	0	0	0	0
1704.5	0	0	0	0	0	0	0		0	0	0	0	0
1705.5	0	0	0	0	0	0	0		0	0	0	0	0
1706.5	0	0	0	0	0	0	0		0	0	0	0	0
1707.5	0	0	0	0	0	0	0		0	0	0	0	0
1708.5	0	0	0	0	0	0	0		0	0	0	0	0
1709.5	0	0	0	0	0	0	0		0	0	0	0	0
1710.5	0	0	0	0	0	0	0		0	0	0	0	0
1711.5	0	0	0	0	0	0	0		0	0	0	0	0
1712.5	0	0	0	0	0	0	0		0	0	0	0	0
1713.5	0	0	0	0	0	0	0		0	0	0	0	0
1714.5	0	0	0	0	0	0	0		0	0	0	0	0
1715.5	0	0	0	0	0	0	0		0	0	0	0	0
1716.5	0	0	0	0	0	0	0		0	0	0	0	0
1717.5	0	0	0	0	0	0	0		0	0	0	0	0
1718.5	0	0	0	0	0	0	0		0	0	0	0	0
1719.5	0	0	0	0	0	0	0		0	0	0	0	0
1720.5	0	0	0	0	0	0	0		0	0	0	0	0
1721.5	0	0	0	0	0	0	0		0	0	0	0	0
1722.5	0	0	0	0	0	0	0		0	0	0	0	0
1723.5	0	0	0	0	0	0	0		0	0	0	0	0
1724.5	0	0	0	0	0	0	0		0	0	0	0	0
1725.5	0	0	0	0	0	0	0		0	0	0	0	0
1726.5	0	0	0	0	0	0	0		0	0	0	0	0
1727.5	0	0	0	0	0	0	0		0	0	0	0	0
1728.5	0	0	0	0	0	0	0		0	0	0	0	0
1729.5	0	0	0	0	0	0	0		0	0	0	0	0
1730.5	0	0	0	0	0	0	0		0	0	0	0	0
1731.5	0	0	0	0	0	0	0		0	0	0	0	0
1732.5	0	0	0	0	0	0	0		0	0	0	0	0
1733.5	0	0	0	0	0	0	0		0	0	0	0	0
1734.5	0	0	0	0	0	0	0		0	0	0	0	0
1735.5	0	0	0	0	0	0	0		0	0	0	0	0
1736.5	0	0	0	0	0	0	0		0	0	0	0	0
1737.5	0	0	0	0	0	0	0		0	0	0	0	0
1738.5	0	0	0	0	0	0	0		0	0	0	0	0
1739.5	0	0	0	0	0	0	0		0	0	0	0	0
1740.5	0	0	0	0	0	0	0		0	0	0	0	0
1741.5	0	0	0	0	0	0	0		0	0	0	0	0
1742.5	0	0	0	0	0	0	0		0	0	0	0	0
1743.5	0	0	0	0	0	0	0		0	0	0	0	0
1744.5	0	0	0	0	0	0	0		0	0	0	0	0
1745.5	0	0	0	0	0	0	0		0	0	0	0	0
1746.5	0	0	0	0	0	0	0		0	0	0	0	0
1747.5	0	0	0	0	0	0	0		0	0	0	0	0
1748.5	0	0	0	0	0	0	0		0	0	0	0	0
1749.5	0	0	0	0	0	0	0		0	0	0	0	0
1750.5	0	0	0	0	0	0	0		0	0	0	0	0
1751.5	0	0	0	0	0	0	0		0	0	0	0	0
1752.5	0	0	0	0	0	0	0		0	0	0	0	0
1753.5	0	0	0	0	0	0	0		0	0	0	0	0
1754.5	0	0	0	0	0	0	0		0	0	0	0	0
1755.5	0	0	0	0	0	0	0		0	0	0	0	0
1756.5	0	0	0	0	0	0	0		0	0	0	0	0
1757.5	0	0	0	0	0	0	0		0	0	0	0	0
1758.5	0	0	0	0	0	0	0		0	0	0	0	0
1759.5	0	0	0	0	0	0	0		0	0	0	0	0
1760.5	0	0	0	0	0	0	0		0	0	0	0	0
1761.5	0	0	0	0	0	0	0		0	0	0	0	0
1762.5	0	0	0	0	0	0	0		0	0	0	0	0
1763.5	0	0	0	0	0	0	0		0	0	0	0	0
1764.5	0	0	0	0	0	0	0		0	0	0	0	0
1765.5	0	0	0	0	0	0	0		0	0	0	0	0
1766.5	0	0	0	0	0	0	0		0	0	0	0	0
1767.5	0	0	0	0	0	0	0		0	0	0	0	0
1768.5	0	0	0	0	0	0	0		0	0	0	0	0
1769.5	0	0	0	0	0	0	0		0	0	0	0	0
1770.5	0	0	0	0	0	0	0		0	0	0	0	0
1771.5	0	0	0	0	0	0	0		0	0	0	0	0
1772.5	0	0	0	0	0	0	0		0	0	0	0	0
1773.5	0	0	0	0	0	0	0		0	0	0	0	0
1774.5	0	0	0	0	0	0	0		0	0	0	0	0
1775.5	0	0	0	0	0	0	0		0	0	0	0	0
1776.5	0	0	0	0	0	0	0		0	0	0	0	0
1777.5	0	0	0	0	0	0	0		0	0	0	0	0
1778.5	0	0	0	0	0	0	0		0	0	0	0	0
1779.5	0	0	0	0	0	0	0		0	0	0	0	0
1780.5	0	0	0	0	0	0	0		0	0	0	0	0
1781.5	0	0	0	0	0	0	0		0	0	0	0	0
1782.5	0	0	0	0	0	0	0		0	0	0	0	0
1783.5	0	0	0	0	0	0	0		0	0	0	0	0
1784.5	0	0	0	0	0	0	0		0	0	0	0	0
1785.5	0	0	0	0	0	0	0		0	0	0	0	0
1786.5	0	0	0	0	0	0	0		0	0	0	0	0
1787.5	0	0	0	0	0	0	0		0	0	0	0	0
1788.5	0	0	0	0	0	0	0		0	0	0	0	0
1789.5	0	0	0	0	0	0	0		0	0	0	0	0
1790.5	0	0	0	0	0	0	0		0	0	0	0	0
1791.5	0	0	0	0	0	0	0		0	0	0	0	0
1792.5	0	0	0	0	0	0	0		0	0	0	0	0
1793.5	0	0	0	0	0	0	0		0	0	0	0	0
1794.5	0	0	0	0	0	0	0		0	0	0	0	0
1795.5	0	0	0	0	0	0	0		0	0	0	0	0
1796.5	0	0	0	0	0	0	0		0	0	0	0	0
1797.5	0	0	0	0	0	0	0		0	0	0	0	0
1798.5	0	0	0	0	0	0	0		0	0	0	0	0
1799.5	0	0	0	0	0	0	0		0	0	0	0	0
1800.5	0	0	0	0	0	0	0		0	0	0	0	0

## Sheet: 20 Hz
	20 Hz
Temps (s)	BG-143	BG-146	BG-148	BG-150	BG-158	BG-159	BG-160	BG-162	BG-163	Mean	s,e,m,	sem+	sem-
0.5	0	0	0	0	0	0	0	0	0	0	0		0
1.5	0	0	0	0	0	0	0	0	0	0	0	0	0
2.5	0	0	0	0	0	0	0	0	0	0	0	0	0
3.5	0	0	0	0	0	0	0	0	0	0	0	0	0
4.5	0	0	0	0	0	0	0	0	0	0	0	0	0
5.5	0	0	0	0	0	0	0	0	0	0	0	0	0
6.5	0	0	0	0	0	0	0	0	0	0	0	0	0
7.5	0	0	0	0	0	0	0	0	0	0	0	0	0
8.5	0	0	0	0	0	0	0	0	0	0	0	0	0
9.5	0	0	0	0	0	0	0	0	0	0	0	0	0
10.5	0	0	0	0	0	0	0	0	0	0	0	0	0
11.5	0	0	0	0	0	0	0	0	0	0	0	0	0
12.5	0	0	0	0	0	0	0	0	0	0	0	0	0
13.5	0	0	0	0	0	0	0	0	0	0	0	0	0
14.5	0	0	0	0	0	0	0	0	0	0	0	0	0
15.5	0	0	0	0	0	0	0	0	0	0	0	0	0
16.5	0	0	0	0	0	0	0	0	0	0	0	0	0
17.5	0	0	0	0	0	0	0	0	0	0	0	0	0
18.5	0	0	0	0	0	0	0	0	0	0	0	0	0
19.5	0	0	0	0	0	0	0	0	0	0	0	0	0
20.5	0	0	0	0	0	0	0	0	0	0	0	0	0
21.5	0	0	0	0	0	0	0	0	0	0	0	0	0
22.5	0	0	0	0	0	0	0	0	0	0	0	0	0
23.5	0	0	0	0	0	0	0	0	0	0	0	0	0
24.5	0	0	0	0	0	0	0	0	0	0	0	0	0
25.5	0	0	0	0	0	0	0	0	0	0	0	0	0
26.5	0	0	0	0	0	0	0	0	0	0	0	0	0
27.5	0	0	0	0	0	0	0	0	0	0	0	0	0
28.5	0	0	0	0	0	0	0	0	0	0	0	0	0
29.5	0	0	0	0	0	0	0	0	0	0	0	0	0
30.5	16	10	1	8	14	1	2	8	16	8.44444	2.16587	10.6103	6.27858
31.5	19	7	6	12	13	0	5	4	9	8.33333	2	10.3333	6.33333
32.5	14	5	6	8	8	0	6	9	7	7	1.31101	8.31101	5.68899
33.5	12	1	4	7	6	0	6	7	6	5.44444	1.25139	6.69583	4.19306
34.5	10	4	4	7	5	0	3	8	6	5.22222	1.0425	6.26472	4.17972
35.5	10	2	2	6	5	0	3	4	5	4.11111	1.02232	5.13343	3.08879
36.5	10	2	2	6	4	0	2	3	4	3.66667	1.03078	4.69744	2.63589
37.5	9	1	2	4	4	0	2	5	5	3.55556	0.953794	4.50935	2.60176
38.5	10	3	2	5	0	0	1	1	3	2.77778	1.11492	3.8927	1.66285
39.5	9	4	1	4	4	0	2	1	3	3.11111	0.942809	4.05392	2.1683
40.5	1	0	1	1	0	0	0	0	1	0.444444	0.186339	0.630783	0.258105
41.5	0	0	0	0	0	0	0	0	0	0	0	0	0
42.5	0	0	0	0	0	0	0	0	0	0	0	0	0
43.5	0	0	0	0	0	0	0	0	0	0	0	0	0
44.5	0	0	0	0	0	0	0	0	0	0	0	0	0
45.5	0	0	0	0	0	0	0	0	0	0	0	0	0
46.5	0	0	0	0	0	0	0	0	0	0	0	0	0
47.5	0	0	0	0	0	0	0	0	0	0	0	0	0
48.5	0	0	0	0	0	0	0	0	0	0	0	0	0
49.5	0	0	0	0	0	0	0	0	0	0	0	0	0
50.5	0	0	0	0	0	0	0	0	0	0	0	0	0
51.5	0	0	0	0	0	0	0	0	0	0	0	0	0
52.5	0	0	0	0	0	0	0	0	0	0	0	0	0
53.5	0	0	0	0	0	0	0	0	0	0	0	0	0
54.5	0	0	0	0	0	0	0	0	0	0	0	0	0
55.5	0	0	0	0	0	0	0	0	0	0	0	0	0
56.5	0	0	0	0	0	0	0	0	0	0	0	0	0
57.5	0	0	0	0	0	0	0	0	0	0	0	0	0
58.5	0	0	0	0	0	0	0	0	0	0	0	0	0
59.5	0	0	0	0	0	0	0	0	0	0	0	0	0
60.5	0	0	0	0	0	0	0	0	0	0	0	0	0
61.5	0	0	0	0	0	0	0	0	0	0	0	0	0
62.5	0	0	0	0	0	0	0	0	0	0	0	0	0
63.5	0	0	0	0	0	0	0	0	0	0	0	0	0
64.5	0	0	0	0	0	0	0	0	0	0	0	0	0
65.5	0	0	0	0	0	0	0	0	0	0	0	0	0
66.5	0	0	0	0	0	0	0	0	0	0	0	0	0
67.5	0	0	0	0	0	0	0	0	0	0	0	0	0
68.5	0	0	0	0	0	0	0	0	0	0	0	0	0
69.5	0	0	0	0	0	0	0	0	0	0	0	0	0
70.5	0	0	0	0	0	0	0	0	0	0	0	0	0
71.5	0	0	0	0	0	0	0	0	0	0	0	0	0
72.5	0	0	0	0	0	0	0	0	0	0	0	0	0
73.5	0	0	0	0	0	0	0	0	0	0	0	0	0
74.5	0	0	0	0	0	0	0	0	0	0	0	0	0
75.5	0	0	0	0	0	0	0	0	0	0	0	0	0
76.5	0	0	0	0	0	0	0	0	0	0	0	0	0
77.5	0	0	0	0	0	0	0	0	0	0	0	0	0
78.5	0	0	0	0	0	0	0	0	0	0	0	0	0
79.5	0	0	0	0	0	0	0	0	0	0	0	0	0
80.5	0	0	0	0	0	0	0	0	0	0	0	0	0
81.5	0	0	0	0	0	0	0	0	0	0	0	0	0
82.5	0	0	0	0	0	0	0	0	0	0	0	0	0
83.5	0	0	0	0	0	0	0	0	0	0	0	0	0
84.5	0	0	0	0	0	0	0	0	0	0	0	0	0
85.5	0	0	0	0	0	0	0	0	0	0	0	0	0
86.5	0	0	0	0	0	0	0	0	0	0	0	0	0
87.5	0	0	0	0	0	0	0	0	0	0	0	0	0
88.5	0	0	0	0	0	0	0	0	0	0	0	0	0
89.5	0	0	0	0	0	0	0	0	0	0	0	0	0
90.5	0	0	0	0	0	0	0	0	0	0	0	0	0
91.5	0	0	0	0	0	0	0	0	0	0	0	0	0
92.5	0	0	0	0	0	0	0	0	0	0	0	0	0
93.5	0	0	0	0	0	0	0	0	0	0	0	0	0
94.5	0	0	0	0	0	0	0	0	0	0	0	0	0
95.5	0	0	0	0	0	0	0	0	0	0	0	0	0
96.5	0	0	0	0	0	0	0	0	0	0	0	0	0
97.5	0	0	0	0	0	0	0	0	0	0	0	0	0
98.5	0	0	0	0	0	0	0	0	0	0	0	0	0
99.5	0	0	0	0	0	0	0	0	0	0	0	0	0
100.5	0	0	0	0	0	0	0	0	0	0	0	0	0
101.5	0	0	0	0	0	0	0	0	0	0	0	0	0
102.5	0	0	0	0	0	0	0	0	0	0	0	0	0
103.5	0	0	0	0	0	0	0	0	0	0	0	0	0
104.5	0	0	0	0	0	0	0	0	0	0	0	0	0
105.5	0	0	0	0	0	0	0	0	0	0	0	0	0
106.5	0	0	0	0	0	0	0	0	0	0	0	0	0
107.5	0	0	0	0	0	0	0	0	0	0	0	0	0
108.5	0	0	0	0	0	0	0	0	0	0	0	0	0
109.5	0	0	0	0	0	0	0	0	0	0	0	0	0
110.5	0	0	0	0	0	0	0	0	0	0	0	0	0
111.5	0	0	0	0	0	0	0	0	0	0	0	0	0
112.5	0	0	0	0	0	0	0	0	0	0	0	0	0
113.5	0	0	0	0	0	0	0	0	0	0	0	0	0
114.5	0	0	0	0	0	0	0	0	0	0	0	0	0
115.5	0	0	0	0	0	0	0	0	0	0	0	0	0
116.5	0	0	0	0	0	0	0	0	0	0	0	0	0
117.5	0	0	0	0	0	0	0	0	0	0	0	0	0
118.5	0	0	0	0	0	0	0	0	0	0	0	0	0
119.5	0	0	0	0	0	0	0	0	0	0	0	0	0
120.5	0	0	0	0	0	0	0	0	0	0	0	0	0
121.5	0	0	0	0	0	0	0	0	0	0	0	0	0
122.5	0	0	0	0	0	0	0	0	0	0	0	0	0
123.5	0	0	0	0	0	0	0	0	0	0	0	0	0
124.5	0	0	0	0	0	0	0	0	0	0	0	0	0
125.5	0	0	0	0	0	0	0	0	0	0	0	0	0
126.5	0	0	0	0	0	0	0	0	0	0	0	0	0
127.5	0	0	0	0	0	0	0	0	0	0	0	0	0
128.5	0	0	0	0	0	0	0	0	0	0	0	0	0
129.5	0	0	0	0	0	0	0	0	0	0	0	0	0
130.5	0	0	0	0	0	0	0	0	0	0	0	0	0
131.5	0	0	0	0	0	0	0	0	0	0	0	0	0
132.5	0	0	0	0	0	0	0	0	0	0	0	0	0
133.5	0	0	0	0	0	0	0	0	0	0	0	0	0
134.5	0	0	0	0	0	0	0	0	0	0	0	0	0
135.5	0	0	0	0	0	0	0	0	0	0	0	0	0
136.5	0	0	0	0	0	0	0	0	0	0	0	0	0
137.5	0	0	0	0	0	0	0	0	0	0	0	0	0
138.5	0	0	0	0	0	0	0	0	0	0	0	0	0
139.5	0	0	0	0	0	0	0	0	0	0	0	0	0
140.5	0	0	0	0	0	0	0	0	0	0	0	0	0
141.5	0	0	0	0	0	0	0	0	0	0	0	0	0
142.5	0	0	0	0	0	0	0	0	0	0	0	0	0
143.5	0	0	0	0	0	0	0	0	0	0	0	0	0
144.5	0	0	0	0	0	0	0	0	0	0	0	0	0
145.5	0	0	0	0	0	0	0	0	0	0	0	0	0
146.5	0	0	0	0	0	0	0	0	0	0	0	0	0
147.5	0	0	0	0	0	0	0	0	0	0	0	0	0
148.5	0	0	0	0	0	0	0	0	0	0	0	0	0
149.5	0	0	0	0	0	0	0	0	0	0	0	0	0
150.5	0	0	0	0	0	0	0	0	0	0	0	0	0
151.5	0	0	0	0	0	0	0	0	0	0	0	0	0
152.5	0	0	0	0	0	0	0	0	0	0	0	0	0
153.5	0	0	0	0	0	0	0	0	0	0	0	0	0
154.5	0	0	0	0	0	0	0	0	0	0	0	0	0
155.5	0	0	0	0	0	0	0	0	0	0	0	0	0
156.5	0	0	0	0	0	0	0	0	0	0	0	0	0
157.5	0	0	0	0	0	0	0	0	0	0	0	0	0
158.5	0	0	0	0	0	0	0	0	0	0	0	0	0
159.5	0	0	0	0	0	0	0	0	0	0	0	0	0
160.5	0	0	0	0	0	0	0	0	0	0	0	0	0
161.5	0	0	0	0	0	0	0	0	0	0	0	0	0
162.5	0	0	0	0	0	0	0	0	0	0	0	0	0
163.5	0	0	0	0	0	0	0	0	0	0	0	0	0
164.5	0	0	0	0	0	0	0	0	0	0	0	0	0
165.5	0	0	0	0	0	0	0	0	0	0	0	0	0
166.5	0	0	0	0	0	0	0	0	0	0	0	0	0
167.5	0	0	0	0	0	0	0	0	0	0	0	0	0
168.5	0	0	0	0	0	0	0	0	0	0	0	0	0
169.5	0	0	0	0	0	0	0	0	0	0	0	0	0
170.5	0	0	0	0	0	0	0	0	0	0	0	0	0
171.5	0	0	0	0	0	0	0	0	0	0	0	0	0
172.5	0	0	0	0	0	0	0	0	0	0	0	0	0
173.5	0	0	0	0	0	0	0	0	0	0	0	0	0
174.5	0	0	0	0	0	0	0	0	0	0	0	0	0
175.5	0	0	0	0	0	0	0	0	0	0	0	0	0
176.5	0	0	0	0	0	0	0	0	0	0	0	0	0
177.5	0	0	0	0	0	0	0	0	0	0	0	0	0
178.5	0	0	0	0	0	0	0	0	0	0	0	0	0
179.5	0	0	0	0	0	0	0	0	0	0	0	0	0
180.5	0	0	0	0	0	0	0	0	0	0	0	0	0
181.5	0	0	0	0	0	0	0	0	0	0	0	0	0
182.5	0	0	0	0	0	0	0	0	0	0	0	0	0
183.5	0	0	0	0	0	0	0	0	0	0	0	0	0
184.5	0	0	0	0	0	0	0	0	0	0	0	0	0
185.5	0	0	0	0	0	0	0	0	0	0	0	0	0
186.5	0	0	0	0	0	0	0	0	0	0	0	0	0
187.5	0	0	0	0	0	0	0	0	0	0	0	0	0
188.5	0	0	0	0	0	0	0	0	0	0	0	0	0
189.5	0	0	0	0	0	0	0	0	0	0	0	0	0
190.5	0	0	0	0	0	0	0	0	0	0	0	0	0
191.5	0	0	0	0	0	0	0	0	0	0	0	0	0
192.5	0	0	0	0	0	0	0	0	0	0	0	0	0
193.5	0	0	0	0	0	0	0	0	0	0	0	0	0
194.5	0	0	0	0	0	0	0	0	0	0	0	0	0
195.5	0	0	0	0	0	0	0	0	0	0	0	0	0
196.5	0	0	0	0	0	0	0	0	0	0	0	0	0
197.5	0	0	0	0	0	0	0	0	0	0	0	0	0
198.5	0	0	0	0	0	0	0	0	0	0	0	0	0
199.5	0	0	0	0	0	0	0	0	0	0	0	0	0
200.5	0	0	0	0	0	0	0	0	0	0	0	0	0
201.5	0	0	0	0	0	0	0	0	0	0	0	0	0
202.5	0	0	0	0	0	0	0	0	0	0	0	0	0
203.5	0	0	0	0	0	0	0	0	0	0	0	0	0
204.5	0	0	0	0	0	0	0	0	0	0	0	0	0
205.5	0	0	0	0	0	0	0	0	0	0	0	0	0
206.5	0	0	0	0	0	0	0	0	0	0	0	0	0
207.5	0	0	0	0	0	0	0	0	0	0	0	0	0
208.5	0	0	0	0	0	0	0	0	0	0	0	0	0
209.5	0	0	0	0	0	0	0	0	0	0	0	0	0
210.5	0	0	0	0	0	0	0	0	0	0	0	0	0
211.5	0	0	0	0	0	0	0	0	0	0	0	0	0
212.5	0	0	0	0	0	0	0	0	0	0	0	0	0
213.5	0	0	0	0	0	0	0	0	0	0	0	0	0
214.5	0	0	0	0	0	0	0	0	0	0	0	0	0
215.5	0	0	0	0	0	0	0	0	0	0	0	0	0
216.5	0	0	0	0	0	0	0	0	0	0	0	0	0
217.5	0	0	0	0	0	0	0	0	0	0	0	0	0
218.5	0	0	0	0	0	0	0	0	0	0	0	0	0
219.5	0	0	0	0	0	0	0	0	0	0	0	0	0
220.5	0	0	0	0	0	0	0	0	0	0	0	0	0
221.5	0	0	0	0	0	0	0	0	0	0	0	0	0
222.5	0	0	0	0	0	0	0	0	0	0	0	0	0
223.5	0	0	0	0	0	0	0	0	0	0	0	0	0
224.5	0	0	0	0	0	0	0	0	0	0	0	0	0
225.5	0	0	0	0	0	0	0	0	0	0	0	0	0
226.5	0	0	0	0	0	0	0	0	0	0	0	0	0
227.5	0	0	0	0	0	0	0	0	0	0	0	0	0
228.5	0	0	0	0	0	0	0	0	0	0	0	0	0
229.5	0	0	0	0	0	0	0	0	0	0	0	0	0
230.5	0	0	0	0	0	0	0	0	0	0	0	0	0
231.5	0	0	0	0	0	0	0	0	0	0	0	0	0
232.5	0	0	0	0	0	0	0	0	0	0	0	0	0
233.5	0	0	0	0	0	0	0	0	0	0	0	0	0
234.5	0	0	0	0	0	0	0	0	0	0	0	0	0
235.5	0	0	0	0	0	0	0	0	0	0	0	0	0
236.5	0	0	0	0	0	0	0	0	0	0	0	0	0
237.5	0	0	0	0	0	0	0	0	0	0	0	0	0
238.5	0	0	0	0	0	0	0	0	0	0	0	0	0
239.5	0	0	0	0	0	0	0	0	0	0	0	0	0
240.5	0	0	0	0	0	0	0	0	0	0	0	0	0
241.5	0	0	0	0	0	0	0	0	0	0	0	0	0
242.5	0	0	0	0	0	0	0	0	0	0	0	0	0
243.5	0	0	0	0	0	0	0	0	0	0	0	0	0
244.5	0	0	0	0	0	0	0	0	0	0	0	0	0
245.5	0	0	0	0	0	0	0	0	0	0	0	0	0
246.5	0	0	0	0	0	0	0	0	0	0	0	0	0
247.5	0	0	0	0	0	0	0	0	0	0	0	0	0
248.5	0	0	0	0	0	0	0	0	0	0	0	0	0
249.5	0	0	0	0	0	0	0	0	0	0	0	0	0
250.5	0	0	0	0	0	0	0	0	0	0	0	0	0
251.5	0	0	0	0	0	0	0	0	0	0	0	0	0
252.5	0	0	0	0	0	0	0	0	0	0	0	0	0
253.5	0	0	0	0	0	0	0	0	0	0	0	0	0
254.5	0	0	0	0	0	0	0	0	0	0	0	0	0
255.5	0	0	0	0	0	0	0	0	0	0	0	0	0
256.5	0	0	0	0	0	0	0	0	0	0	0	0	0
257.5	0	0	0	0	0	0	0	0	0	0	0	0	0
258.5	0	0	0	0	0	0	0	0	0	0	0	0	0
259.5	0	0	0	0	0	0	0	0	0	0	0	0	0
260.5	0	0	0	0	0	0	0	0	0	0	0	0	0
261.5	0	0	0	0	0	0	0	0	0	0	0	0	0
262.5	0	0	0	0	0	0	0	0	0	0	0	0	0
263.5	0	0	0	0	0	0	0	0	0	0	0	0	0
264.5	0	0	0	0	0	0	0	0	0	0	0	0	0
265.5	0	0	0	0	0	0	0	0	0	0	0	0	0
266.5	0	0	0	0	0	0	0	0	0	0	0	0	0
267.5	0	0	0	0	0	0	0	0	0	0	0	0	0
268.5	0	0	0	0	0	0	0	0	0	0	0	0	0
269.5	0	0	0	0	0	0	0	0	0	0	0	0	0
270.5	0	0	0	0	0	0	0	0	0	0	0	0	0
271.5	0	0	0	0	0	0	0	0	0	0	0	0	0
272.5	0	0	0	0	0	0	0	0	0	0	0	0	0
273.5	0	0	0	0	0	0	0	0	0	0	0	0	0
274.5	0	0	0	0	0	0	0	0	0	0	0	0	0
275.5	0	0	0	0	0	0	0	0	0	0	0	0	0
276.5	0	0	0	0	0	0	0	0	0	0	0	0	0
277.5	0	0	0	0	0	0	0	0	0	0	0	0	0
278.5	0	0	0	0	0	0	0	0	0	0	0	0	0
279.5	0	0	0	0	0	0	0	0	0	0	0	0	0
280.5	0	0	0	0	0	0	0	0	0	0	0	0	0
281.5	0	0	0	0	0	0	0	0	0	0	0	0	0
282.5	0	0	0	0	0	0	0	0	0	0	0	0	0
283.5	0	0	0	0	0	0	0	0	0	0	0	0	0
284.5	0	0	0	0	0	0	0	0	0	0	0	0	0
285.5	0	0	0	0	0	0	0	0	0	0	0	0	0
286.5	0	0	0	0	0	0	0	0	0	0	0	0	0
287.5	0	0	0	0	0	0	0	0	0	0	0	0	0
288.5	0	0	0	0	0	0	0	0	0	0	0	0	0
289.5	0	0	0	0	0	0	0	0	0	0	0	0	0
290.5	0	0	0	0	0	0	0	0	0	0	0	0	0
291.5	0	0	0	0	0	0	0	0	0	0	0	0	0
292.5	0	0	0	0	0	0	0	0	0	0	0	0	0
293.5	0	0	0	0	0	0	0	0	0	0	0	0	0
294.5	0	0	0	0	0	0	0	0	0	0	0	0	0
295.5	0	0	0	0	0	0	0	0	0	0	0	0	0
296.5	0	0	0	0	0	0	0	0	0	0	0	0	0
297.5	0	0	0	0	0	0	0	0	0	0	0	0	0
298.5	0	0	0	0	0	0	0	0	0	0	0	0	0
299.5	0	0	0	0	0	0	0	0	0	0	0	0	0
300.5	0	0	0	0	0	0	0	0	0	0	0	0	0
301.5	0	0	0	0	0	0	0	0	0	0	0	0	0
302.5	0	0	0	0	0	0	0	0	0	0	0	0	0
303.5	0	0	0	0	0	0	0	0	0	0	0	0	0
304.5	0	0	0	0	0	0	0	0	0	0	0	0	0
305.5	0	0	0	0	0	0	0	0	0	0	0	0	0
306.5	0	0	0	0	0	0	0	0	0	0	0	0	0
307.5	0	0	0	0	0	0	0	0	0	0	0	0	0
308.5	0	0	0	0	0	0	0	0	0	0	0	0	0
309.5	0	0	0	0	0	0	0	0	0	0	0	0	0
310.5	0	0	0	0	0	0	0	0	0	0	0	0	0
311.5	0	0	0	0	0	0	0	0	0	0	0	0	0
312.5	0	0	0	0	0	0	0	0	0	0	0	0	0
313.5	0	0	0	0	0	0	0	0	0	0	0	0	0
314.5	0	0	0	0	0	0	0	0	0	0	0	0	0
315.5	0	0	0	0	0	0	0	0	0	0	0	0	0
316.5	0	0	0	0	0	0	0	0	0	0	0	0	0
317.5	0	0	0	0	0	0	0	0	0	0	0	0	0
318.5	0	0	0	0	0	0	0	0	0	0	0	0	0
319.5	0	0	0	0	0	0	0	0	0	0	0	0	0
320.5	0	0	0	0	0	0	0	0	0	0	0	0	0
321.5	0	0	0	0	0	0	0	0	0	0	0	0	0
322.5	0	0	0	0	0	0	0	0	0	0	0	0	0
323.5	0	0	0	0	0	0	0	0	0	0	0	0	0
324.5	0	0	0	0	0	0	0	0	0	0	0	0	0
325.5	0	0	0	0	0	0	0	0	0	0	0	0	0
326.5	0	0	0	0	0	0	0	0	0	0	0	0	0
327.5	0	0	0	0	0	0	0	0	0	0	0	0	0
328.5	0	0	0	0	0	0	0	0	0	0	0	0	0
329.5	0	0	0	0	0	0	0	0	0	0	0	0	0
330.5	0	0	0	0	0	0	0	0	0	0	0	0	0
331.5	0	0	0	0	0	0	0	0	0	0	0	0	0
332.5	0	0	0	0	0	0	0	0	0	0	0	0	0
333.5	0	0	0	0	0	0	0	0	0	0	0	0	0
334.5	0	0	0	0	0	0	0	0	0	0	0	0	0
335.5	0	0	0	0	0	0	0	0	0	0	0	0	0
336.5	0	0	0	0	0	0	0	0	0	0	0	0	0
337.5	0	0	0	0	0	0	0	0	0	0	0	0	0
338.5	0	0	0	0	0	0	0	0	0	0	0	0	0
339.5	0	0	0	0	0	0	0	0	0	0	0	0	0
340.5	0	0	0	0	0	0	0	0	0	0	0	0	0
341.5	0	0	0	0	0	0	0	0	0	0	0	0	0
342.5	0	0	0	0	0	0	0	0	0	0	0	0	0
343.5	0	0	0	0	0	0	0	0	0	0	0	0	0
344.5	0	0	0	0	0	0	0	0	0	0	0	0	0
345.5	0	0	0	0	0	0	0	0	0	0	0	0	0
346.5	0	0	0	0	0	0	0	0	0	0	0	0	0
347.5	0	0	0	0	0	0	0	0	0	0	0	0	0
348.5	0	0	0	0	0	0	0	0	0	0	0	0	0
349.5	0	0	0	0	0	0	0	0	0	0	0	0	0
350.5	0	0	0	0	0	0	0	0	0	0	0	0	0
351.5	0	0	0	0	0	0	0	0	0	0	0	0	0
352.5	0	0	0	0	0	0	0	0	0	0	0	0	0
353.5	0	0	0	0	0	0	0	0	0	0	0	0	0
354.5	0	0	0	0	0	0	0	0	0	0	0	0	0
355.5	0	0	0	0	0	0	0	0	0	0	0	0	0
356.5	0	0	0	0	0	0	0	0	0	0	0	0	0
357.5	0	0	0	0	0	0	0	0	0	0	0	0	0
358.5	0	0	0	0	0	0	0	0	0	0	0	0	0
359.5	0	0	0	0	0	0	0	0	0	0	0	0	0
360.5	0	0	0	0	0	0	0	0	0	0	0	0	0
361.5	0	0	0	0	0	0	0	0	0	0	0	0	0
362.5	0	0	0	0	0	0	0	0	0	0	0	0	0
363.5	0	0	0	0	0	0	0	0	0	0	0	0	0
364.5	0	0	0	0	0	0	0	0	0	0	0	0	0
365.5	0	0	0	0	0	0	0	0	0	0	0	0	0
366.5	0	0	0	0	0	0	0	0	0	0	0	0	0
367.5	0	0	0	0	0	0	0	0	0	0	0	0	0
368.5	0	0	0	0	0	0	0	0	0	0	0	0	0
369.5	0	0	0	0	0	0	0	0	0	0	0	0	0
370.5	0	0	0	0	0	0	0	0	0	0	0	0	0
371.5	0	0	0	0	0	0	0	0	0	0	0	0	0
372.5	0	0	0	0	0	0	0	0	0	0	0	0	0
373.5	0	0	0	0	0	0	0	0	0	0	0	0	0
374.5	0	0	0	0	0	0	0	0	0	0	0	0	0
375.5	0	0	0	0	0	0	0	0	0	0	0	0	0
376.5	0	0	0	0	0	0	0	0	0	0	0	0	0
377.5	0	0	0	0	0	0	0	0	0	0	0	0	0
378.5	0	0	0	0	0	0	0	0	0	0	0	0	0
379.5	0	0	0	0	0	0	0	0	0	0	0	0	0
380.5	0	0	0	0	0	0	0	0	0	0	0	0	0
381.5	0	0	0	0	0	0	0	0	0	0	0	0	0
382.5	0	0	0	0	0	0	0	0	0	0	0	0	0
383.5	0	0	0	0	0	0	0	0	0	0	0	0	0
384.5	0	0	0	0	0	0	0	0	0	0	0	0	0
385.5	0	0	0	0	0	0	0	0	0	0	0	0	0
386.5	0	0	0	0	0	0	0	0	0	0	0	0	0
387.5	0	0	0	0	0	0	0	0	0	0	0	0	0
388.5	0	0	0	0	0	0	0	0	0	0	0	0	0
389.5	0	0	0	0	0	0	0	0	0	0	0	0	0
390.5	0	0	0	0	0	0	0	0	0	0	0	0	0
391.5	0	0	0	0	0	0	0	0	0	0	0	0	0
392.5	0	0	0	0	0	0	0	0	0	0	0	0	0
393.5	0	0	0	0	0	0	0	0	0	0	0	0	0
394.5	0	0	0	0	0	0	0	0	0	0	0	0	0
395.5	0	0	0	0	0	0	0	0	0	0	0	0	0
396.5	0	0	0	0	0	0	0	0	0	0	0	0	0
397.5	0	0	0	0	0	0	0	0	0	0	0	0	0
398.5	0	0	0	0	0	0	0	0	0	0	0	0	0
399.5	0	0	0	0	0	0	0	0	0	0	0	0	0
400.5	0	0	0	0	0	0	0	0	0	0	0	0	0
401.5	0	0	0	0	0	0	0	0	0	0	0	0	0
402.5	0	0	0	0	0	0	0	0	0	0	0	0	0
403.5	0	0	0	0	0	0	0	0	0	0	0	0	0
404.5	0	0	0	0	0	0	0	0	0	0	0	0	0
405.5	0	0	0	0	0	0	0	0	0	0	0	0	0
406.5	0	0	0	0	0	0	0	0	0	0	0	0	0
407.5	0	0	0	0	0	0	0	0	0	0	0	0	0
408.5	0	0	0	0	0	0	0	0	0	0	0	0	0
409.5	0	0	0	0	0	0	0	0	0	0	0	0	0
410.5	0	0	0	0	0	0	0	0	0	0	0	0	0
411.5	0	0	0	0	0	0	0	0	0	0	0	0	0
412.5	0	0	0	0	0	0	0	0	0	0	0	0	0
413.5	0	0	0	0	0	0	0	0	0	0	0	0	0
414.5	0	0	0	0	0	0	0	0	0	0	0	0	0
415.5	0	0	0	0	0	0	0	0	0	0	0	0	0
416.5	0	0	0	0	0	0	0	0	0	0	0	0	0
417.5	0	0	0	0	0	0	0	0	0	0	0	0	0
418.5	0	0	0	0	0	0	0	0	0	0	0	0	0
419.5	0	0	0	0	0	0	0	0	0	0	0	0	0
420.5	0	0	0	0	0	0	0	0	0	0	0	0	0
421.5	0	0	0	0	0	0	0	0	0	0	0	0	0
422.5	0	0	0	0	0	0	0	0	0	0	0	0	0
423.5	0	0	0	0	0	0	0	0	0	0	0	0	0
424.5	0	0	0	0	0	0	0	0	0	0	0	0	0
425.5	0	0	0	0	0	0	0	0	0	0	0	0	0
426.5	0	0	0	0	0	0	0	0	0	0	0	0	0
427.5	0	0	0	0	0	0	0	0	0	0	0	0	0
428.5	0	0	0	0	0	0	0	0	0	0	0	0	0
429.5	0	0	0	0	0	0	0	0	0	0	0	0	0
430.5	0	0	0	0	0	0	0	0	0	0	0	0	0
431.5	0	0	0	0	0	0	0	0	0	0	0	0	0
432.5	0	0	0	0	0	0	0	0	0	0	0	0	0
433.5	0	0	0	0	0	0	0	0	0	0	0	0	0
434.5	0	0	0	0	0	0	0	0	0	0	0	0	0
435.5	0	0	0	0	0	0	0	0	0	0	0	0	0
436.5	0	0	0	0	0	0	0	0	0	0	0	0	0
437.5	0	0	0	0	0	0	0	0	0	0	0	0	0
438.5	0	0	0	0	0	0	0	0	0	0	0	0	0
439.5	0	0	0	0	0	0	0	0	0	0	0	0	0
440.5	0	0	0	0	0	0	0	0	0	0	0	0	0
441.5	0	0	0	0	0	0	0	0	0	0	0	0	0
442.5	0	0	0	0	0	0	0	0	0	0	0	0	0
443.5	0	0	0	0	0	0	0	0	0	0	0	0	0
444.5	0	0	0	0	0	0	0	0	0	0	0	0	0
445.5	0	0	0	0	0	0	0	0	0	0	0	0	0
446.5	0	0	0	0	0	0	0	0	0	0	0	0	0
447.5	0	0	0	0	0	0	0	0	0	0	0	0	0
448.5	0	0	0	0	0	0	0	0	0	0	0	0	0
449.5	0	0	0	0	0	0	0	0	0	0	0	0	0
450.5	0	0	0	0	0	0	0	0	0	0	0	0	0
451.5	0	0	0	0	0	0	0	0	0	0	0	0	0
452.5	0	0	0	0	0	0	0	0	0	0	0	0	0
453.5	0	0	0	0	0	0	0	0	0	0	0	0	0
454.5	0	0	0	0	0	0	0	0	0	0	0	0	0
455.5	0	0	0	0	0	0	0	0	0	0	0	0	0
456.5	0	0	0	0	0	0	0	0	0	0	0	0	0
457.5	0	0	0	0	0	0	0	0	0	0	0	0	0
458.5	0	0	0	0	0	0	0	0	0	0	0	0	0
459.5	0	0	0	0	0	0	0	0	0	0	0	0	0
460.5	0	0	0	0	0	0	0	0	0	0	0	0	0
461.5	0	0	0	0	0	0	0	0	0	0	0	0	0
462.5	0	0	0	0	0	0	0	0	0	0	0	0	0
463.5	0	0	0	0	0	0	0	0	0	0	0	0	0
464.5	0	0	0	0	0	0	0	0	0	0	0	0	0
465.5	0	0	0	0	0	0	0	0	0	0	0	0	0
466.5	0	0	0	0	0	0	0	0	0	0	0	0	0
467.5	0	0	0	0	0	0	0	0	0	0	0	0	0
468.5	0	0	0	0	0	0	0	0	0	0	0	0	0
469.5	0	0	0	0	0	0	0	0	0	0	0	0	0
470.5	0	0	0	0	0	0	0	0	0	0	0	0	0
471.5	0	0	0	0	0	0	0	0	0	0	0	0	0
472.5	0	0	0	0	0	0	0	0	0	0	0	0	0
473.5	0	0	0	0	0	0	0	0	0	0	0	0	0
474.5	0	0	0	0	0	0	0	0	0	0	0	0	0
475.5	0	0	0	0	0	0	0	0	0	0	0	0	0
476.5	0	0	0	0	0	0	0	0	0	0	0	0	0
477.5	0	0	0	0	0	0	0	0	0	0	0	0	0
478.5	0	0	0	0	0	0	0	0	0	0	0	0	0
479.5	0	0	0	0	0	0	0	0	0	0	0	0	0
480.5	0	0	0	0	0	0	0	0	0	0	0	0	0
481.5	0	0	0	0	0	0	0	0	0	0	0	0	0
482.5	0	0	0	0	0	0	0	0	0	0	0	0	0
483.5	0	0	0	0	0	0	0	0	0	0	0	0	0
484.5	0	0	0	0	0	0	0	0	0	0	0	0	0
485.5	0	0	0	0	0	0	0	0	0	0	0	0	0
486.5	0	0	0	0	0	0	0	0	0	0	0	0	0
487.5	0	0	0	0	0	0	0	0	0	0	0	0	0
488.5	0	0	0	0	0	0	0	0	0	0	0	0	0
489.5	0	0	0	0	0	0	0	0	0	0	0	0	0
490.5	0	0	0	0	0	0	0	0	0	0	0	0	0
491.5	0	0	0	0	0	0	0	0	0	0	0	0	0
492.5	0	0	0	0	0	0	0	0	0	0	0	0	0
493.5	0	0	0	0	0	0	0	0	0	0	0	0	0
494.5	0	0	0	0	0	0	0	0	0	0	0	0	0
495.5	0	0	0	0	0	0	0	0	0	0	0	0	0
496.5	0	0	0	0	0	0	0	0	0	0	0	0	0
497.5	0	0	0	0	0	0	0	0	0	0	0	0	0
498.5	0	0	0	0	0	0	0	0	0	0	0	0	0
499.5	0	0	0	0	0	0	0	0	0	0	0	0	0
500.5	0	0	0	0	0	0	0	0	0	0	0	0	0
501.5	0	0	0	0	0	0	0	0	0	0	0	0	0
502.5	0	0	0	0	0	0	0	0	0	0	0	0	0
503.5	0	0	0	0	0	0	0	0	0	0	0	0	0
504.5	0	0	0	0	0	0	0	0	0	0	0	0	0
505.5	0	0	0	0	0	0	0	0	0	0	0	0	0
506.5	0	0	0	0	0	0	0	0	0	0	0	0	0
507.5	0	0	0	0	0	0	0	0	0	0	0	0	0
508.5	0	0	0	0	0	0	0	0	0	0	0	0	0
509.5	0	0	0	0	0	0	0	0	0	0	0	0	0
510.5	0	0	0	0	0	0	0	0	0	0	0	0	0
511.5	0	0	0	0	0	0	0	0	0	0	0	0	0
512.5	0	0	0	0	0	0	0	0	0	0	0	0	0
513.5	0	0	0	0	0	0	0	0	0	0	0	0	0
514.5	0	0	0	0	0	0	0	0	0	0	0	0	0
515.5	0	0	0	0	0	0	0	0	0	0	0	0	0
516.5	0	0	0	0	0	0	0	0	0	0	0	0	0
517.5	0	0	0	0	0	0	0	0	0	0	0	0	0
518.5	0	0	0	0	0	0	0	0	0	0	0	0	0
519.5	0	0	0	0	0	0	0	0	0	0	0	0	0
520.5	0	0	0	0	0	0	0	0	0	0	0	0	0
521.5	0	0	0	0	0	0	0	0	0	0	0	0	0
522.5	0	0	0	0	0	0	0	0	0	0	0	0	0
523.5	0	0	0	0	0	0	0	0	0	0	0	0	0
524.5	0	0	0	0	0	0	0	0	0	0	0	0	0
525.5	0	0	0	0	0	0	0	0	0	0	0	0	0
526.5	0	0	0	0	0	0	0	0	0	0	0	0	0
527.5	0	0	0	0	0	0	0	0	0	0	0	0	0
528.5	0	0	0	0	0	0	0	0	0	0	0	0	0
529.5	0	0	0	0	0	0	0	0	0	0	0	0	0
530.5	0	0	0	0	0	0	0	0	0	0	0	0	0
531.5	0	0	0	0	0	0	0	0	0	0	0	0	0
532.5	0	0	0	0	0	0	0	0	0	0	0	0	0
533.5	0	0	0	0	0	0	0	0	0	0	0	0	0
534.5	0	0	0	0	0	0	0	0	0	0	0	0	0
535.5	0	0	0	0	0	0	0	0	0	0	0	0	0
536.5	0	0	0	0	0	0	0	0	0	0	0	0	0
537.5	0	0	0	0	0	0	0	0	0	0	0	0	0
538.5	0	0	0	0	0	0	0	0	0	0	0	0	0
539.5	0	0	0	0	0	0	0	0	0	0	0	0	0
540.5	0	0	0	0	0	0	0	0	0	0	0	0	0
541.5	0	0	0	0	0	0	0	0	0	0	0	0	0
542.5	0	0	0	0	0	0	0	0	0	0	0	0	0
543.5	0	0	0	0	0	0	0	0	0	0	0	0	0
544.5	0	0	0	0	0	0	0	0	0	0	0	0	0
545.5	0	0	0	0	0	0	0	0	0	0	0	0	0
546.5	0	0	0	0	0	0	0	0	0	0	0	0	0
547.5	0	0	0	0	0	0	0	0	0	0	0	0	0
548.5	0	0	0	0	0	0	0	0	0	0	0	0	0
549.5	0	0	0	0	0	0	0	0	0	0	0	0	0
550.5	0	0	0	0	0	0	0	0	0	0	0	0	0
551.5	0	0	0	0	0	0	0	0	0	0	0	0	0
552.5	0	0	0	0	0	0	0	0	0	0	0	0	0
553.5	0	0	0	0	0	0	0	0	0	0	0	0	0
554.5	0	0	0	0	0	0	0	0	0	0	0	0	0
555.5	0	0	0	0	0	0	0	0	0	0	0	0	0
556.5	0	0	0	0	0	0	0	0	0	0	0	0	0
557.5	0	0	0	0	0	0	0	0	0	0	0	0	0
558.5	0	0	0	0	0	0	0	0	0	0	0	0	0
559.5	0	0	0	0	0	0	0	0	0	0	0	0	0
560.5	0	0	0	0	0	0	0	0	0	0	0	0	0
561.5	0	0	0	0	0	0	0	0	0	0	0	0	0
562.5	0	0	0	0	0	0	0	0	0	0	0	0	0
563.5	0	0	0	0	0	0	0	0	0	0	0	0	0
564.5	0	0	0	0	0	0	0	0	0	0	0	0	0
565.5	0	0	0	0	0	0	0	0	0	0	0	0	0
566.5	0	0	0	0	0	0	0	0	0	0	0	0	0
567.5	0	0	0	0	0	0	0	0	0	0	0	0	0
568.5	0	0	0	0	0	0	0	0	0	0	0	0	0
569.5	0	0	0	0	0	0	0	0	0	0	0	0	0
570.5	0	0	0	0	0	0	0	0	0	0	0	0	0
571.5	0	0	0	0	0	0	0	0	0	0	0	0	0
572.5	0	0	0	0	0	0	0	0	0	0	0	0	0
573.5	0	0	0	0	0	0	0	0	0	0	0	0	0
574.5	0	0	0	0	0	0	0	0	0	0	0	0	0
575.5	0	0	0	0	0	0	0	0	0	0	0	0	0
576.5	0	0	0	0	0	0	0	0	0	0	0	0	0
577.5	0	0	0	0	0	0	0	0	0	0	0	0	0
578.5	0	0	0	0	0	0	0	0	0	0	0	0	0
579.5	0	0	0	0	0	0	0	0	0	0	0	0	0
580.5	0	0	0	0	0	0	0	0	0	0	0	0	0
581.5	0	0	0	0	0	0	0	0	0	0	0	0	0
582.5	0	0	0	0	0	0	0	0	0	0	0	0	0
583.5	0	0	0	0	0	0	0	0	0	0	0	0	0
584.5	0	0	0	0	0	0	0	0	0	0	0	0	0
585.5	0	0	0	0	0	0	0	0	0	0	0	0	0
586.5	0	0	0	0	0	0	0	0	0	0	0	0	0
587.5	0	0	0	0	0	0	0	0	0	0	0	0	0
588.5	0	0	0	0	0	0	0	0	0	0	0	0	0
589.5	0	0	0	0	0	0	0	0	0	0	0	0	0
590.5	0	0	0	0	0	0	0	0	0	0	0	0	0
591.5	0	0	0	0	0	0	0	0	0	0	0	0	0
592.5	0	0	0	0	0	0	0	0	0	0	0	0	0
593.5	0	0	0	0	0	0	0	0	0	0	0	0	0
594.5	0	0	0	0	0	0	0	0	0	0	0	0	0
595.5	0	0	0	0	0	0	0	0	0	0	0	0	0
596.5	0	0	0	0	0	0	0	0	0	0	0	0	0
597.5	0	0	0	0	0	0	0	0	0	0	0	0	0
598.5	0	0	0	0	0	0	0	0	0	0	0	0	0
599.5	0	0	0	0	0	0	0	0	0	0	0	0	0
600.5	0	0	0	0	0	0	0	0	0	0	0	0	0
601.5	0	0	0	0	0	0	0	0	0	0	0	0	0
602.5	0	0	0	0	0	0	0	0	0	0	0	0	0
603.5	0	0	0	0	0	0	0	0	0	0	0	0	0
604.5	0	0	0	0	0	0	0	0	0	0	0	0	0
605.5	0	0	0	0	0	0	0	0	0	0	0	0	0
606.5	0	0	0	0	0	0	0	0	0	0	0	0	0
607.5	0	0	0	0	0	0	0	0	0	0	0	0	0
608.5	0	0	0	0	0	0	0	0	0	0	0	0	0
609.5	0	0	0	0	0	0	0	0	0	0	0	0	0
610.5	0	0	0	0	0	0	0	0	0	0	0	0	0
611.5	0	0	0	0	0	0	0	0	0	0	0	0	0
612.5	0	0	0	0	0	0	0	0	0	0	0	0	0
613.5	0	0	0	0	0	0	0	0	0	0	0	0	0
614.5	0		0	0	0	0	0	0	0	0	0	0	0
615.5	0		0	0	0	0	0	0	0	0	0	0	0
616.5	0		0	0	0	0	0	0	0	0	0	0	0
617.5	0		0	0	0	0	0	0	0	0	0	0	0
618.5	0		0	0	0	0	0	0	0	0	0	0	0
619.5	0		0	0	0	0	0	0	0	0	0	0	0
620.5	0		0	0	0	0	0	0	0	0	0	0	0
621.5	0		0	0	0	0	0	0	0	0	0	0	0
622.5	0		0	0	0	0	0	0	0	0	0	0	0
623.5	0		0	0	0	0	0	0	0	0	0	0	0
624.5	0		0	0	0	0	0	0	0	0	0	0	0
625.5	0		0	0	0	0	0	0	0	0	0	0	0
626.5	0		0	0	0	0	0	0	0	0	0	0	0
627.5	0		0	0	0	0	0	0	0	0	0	0	0
628.5	0		0	0	0	0	0	0	0	0	0	0	0
629.5	0		0	0	0	0	0	0	0	0	0	0	0
630.5	0		0	0	0	0	0	0	0	0	0	0	0
631.5	0		0	0	0	0	0	0	0	0	0	0	0
632.5	0		0	0	0	0	0	0	0	0	0	0	0
633.5	0		0	0	0	0	0	0	0	0	0	0	0
634.5	0		0	0	0	0	0	0	0	0	0	0	0
635.5	0		0	0	0	0	0	0	0	0	0	0	0
636.5	0		0	0	0	0	0	0	0	0	0	0	0
637.5	0		0	0	0	0	0	0	0	0	0	0	0
638.5	0		0	0	0	0	0	0	0	0	0	0	0
639.5	0		0	0	0	0	0	0	0	0	0	0	0
640.5	0		0	0	0	0	0	0	0	0	0	0	0
641.5	0		0	0	0	0	0	0	0	0	0	0	0
642.5	0		0	0	0	0	0	0	0	0	0	0	0
643.5	0		0	0	0	0	0	0	0	0	0	0	0
644.5	0		0	0	0	0	0	0	0	0	0	0	0
645.5	0		0	0	0	0	0	0	0	0	0	0	0
646.5	0		0	0	0	0	0	0	0	0	0	0	0
647.5	0		0	0	0	0	0	0	0	0	0	0	0
648.5	0		0	0	0	0	0	0	0	0	0	0	0
649.5	0		0	0	0	0	0	0	0	0	0	0	0
650.5	0		0	0	0	0	0	0	0	0	0	0	0
651.5	0		0	0	0	0	0	0	0	0	0	0	0
652.5	0		0	0	0	0	0	0	0	0	0	0	0
653.5	0		0	0	0	0	0	0	0	0	0	0	0
654.5	0		0	0	0	0	0	0	0	0	0	0	0
655.5	0		0	0	0	0	0	0	0	0	0	0	0
656.5	0		0	0	0	0	0	0	0	0	0	0	0
657.5	0		0	0	0	0	0	0	0	0	0	0	0
658.5	0		0	0	0	0	0	0	0	0	0	0	0
659.5	0		0	0	0	0	0	0	0	0	0	0	0
660.5	0		0	0	0	0	0	0	0	0	0	0	0
661.5	0		0	0	0	0	0	0	0	0	0	0	0
662.5	0		0	0	0	0	0	0	0	0	0	0	0
663.5	0		0	0	0	0	0	0	0	0	0	0	0
664.5	0		0	0	0	0	0	0	0	0	0	0	0
665.5	0		0	0	0	0	0	0	0	0	0	0	0
666.5	0		0	0	0	0	0	0	0	0	0	0	0
667.5	0		0	0	0	0	0	0	0	0	0	0	0
668.5	0		0	0	0	0	0	0	0	0	0	0	0
669.5	0		0	0	0	0	0	0	0	0	0	0	0
670.5	0		0	0	0	0	0	0	0	0	0	0	0
671.5	0		0	0	0	0	0	0	0	0	0	0	0
672.5	0		0	0	0	0	0	0	0	0	0	0	0
673.5	0		0	0	0	0	0	0	0	0	0	0	0
674.5	0		0	0	0	0	0	0	0	0	0	0	0
675.5	0		0	0	0	0	0	0	0	0	0	0	0
676.5	0		0	0	0	0	0	0	0	0	0	0	0
677.5	0		0	0	0	0	0	0	0	0	0	0	0
678.5	0		0	0	0	0	0	0	0	0	0	0	0
679.5	0		0	0	0	0	0	0	0	0	0	0	0
680.5	0		0	0	0	0	0	0	0	0	0	0	0
681.5	0		0	0	0	0	0	0	0	0	0	0	0
682.5	0		0	0	0	0	0	0	0	0	0	0	0
683.5	0		0	0	0	0	0	0	0	0	0	0	0
684.5	0		0	0	0	0	0	0	0	0	0	0	0
685.5	0		0	0	0	0	0	0	0	0	0	0	0
686.5	0		0	0	0	0	0	0	0	0	0	0	0
687.5	0		0	0	0	0	0	0	0	0	0	0	0
688.5	0		0	0	0	0	0	0	0	0	0	0	0
689.5	0		0	0	0	0	0	0	0	0	0	0	0
690.5	0		0	0	0	0	0	0	0	0	0	0	0
691.5	0		0	0	0	0	0	0	0	0	0	0	0
692.5	0		0	0	0	0	0	0	0	0	0	0	0
693.5	0		0	0	0	0	0	0	0	0	0	0	0
694.5	0		0	0	0	0	0	0	0	0	0	0	0
695.5	0		0	1	0	0	0	0	0	0.125	0.133631	0.258631	-0.00863062
696.5	0		0	0	0	0	0	0	0	0	0	0	0
697.5	0		0	0	0	0	0	0	0	0	0	0	0
698.5	0		0	0	0	0	0	0	0	0	0	0	0
699.5	0		0	0	0	0	0	0	0	0	0	0	0
700.5	0		0	0	0	0	0	0	0	0	0	0	0
701.5	0		0	0	0	0	0	0	0	0	0	0	0
702.5	0		0	0	0	0	0	0	0	0	0	0	0
703.5	0		0	0	0	0	0	0	0	0	0	0	0
704.5	0		0	0	0	0	0	0	0	0	0	0	0
705.5	0		0	0	0	0	0	0	0	0	0	0	0
706.5	0		0	0	0	0	0	0	0	0	0	0	0
707.5	0		0	0	0	0	0	0	0	0	0	0	0
708.5	0		0	0	0	0	0	0	0	0	0	0	0
709.5	0		0	0	0	0	0	0	0	0	0	0	0
710.5	0		0	0	0	0	0	0	0	0	0	0	0
711.5	0		0	0	0	0	0	0	0	0	0	0	0
712.5	0		0	0	0	0	0	0	0	0	0	0	0
713.5	0		0	0	0	0	0	0	0	0	0	0	0
714.5	0		0	0	0	0	0	0	0	0	0	0	0
715.5	0		0	0	0	0	0	0	0	0	0	0	0
716.5	0		0	0	0	0	0	0	0	0	0	0	0
717.5	0		0	0	0	0	0	0	0	0	0	0	0
718.5	0		0	0	0	0	0	0	0	0	0	0	0
719.5	0		0	0	0	0	0	0	0	0	0	0	0
720.5	0		0	0	0	0	0	0	0	0	0	0	0
721.5	0		0	0	0	0	0	0	0	0	0	0	0
722.5	0		0	0	0	0	0	0	0	0	0	0	0
723.5	0		0	0	0	0	0	0	0	0	0	0	0
724.5	0		0	0	0	0	0	0	0	0	0	0	0
725.5	0		0	0	0	0	0	0	0	0	0	0	0
726.5	0		0	0	0	0	0	0	0	0	0	0	0
727.5	0		0	0	0	0	0	0	0	0	0	0	0
728.5	0		0	0	0	0	0	0	0	0	0	0	0
729.5	0		0	0	0	0	0	0	0	0	0	0	0
730.5	0		0	0	0	0	0	0	0	0	0	0	0
731.5	0		0	0	0	0	0	0	0	0	0	0	0
732.5	0		0	0	0	0	0	0	0	0	0	0	0
733.5	0		0	0	0	0	0	0	0	0	0	0	0
734.5	0		0	0	0	0	0	0	0	0	0	0	0
735.5	0		0	0	0	0	0	0	0	0	0	0	0
736.5	0		0	0	0	0	0	0	0	0	0	0	0
737.5	0		0	0	0	0	0	0	0	0	0	0	0
738.5	0		0	0	0	0	0	0	0	0	0	0	0
739.5	0		0	0	0	0	0	0	0	0	0	0	0
740.5	0		0	0	0	0	0	0	0	0	0	0	0
741.5	0		0	0	0	0	0	0	0	0	0	0	0
742.5	0		0	0	0	0	0	0	0	0	0	0	0
743.5	0		0	0	0	0	0	0	0	0	0	0	0
744.5	0		0	0	0	0	0	0	0	0	0	0	0
745.5	0		0	0	0	0	0	0	0	0	0	0	0
746.5	0		0	0	0	0	0	0	0	0	0	0	0
747.5	0		0	0	0	0	0	0	0	0	0	0	0
748.5	0		0	0	0	0	0	0	0	0	0	0	0
749.5	0		0	0	0	0	0	0	0	0	0	0	0
750.5	0		0	0	0	0	0	0	0	0	0	0	0
751.5	0		0	0	0	0	0	0	0	0	0	0	0
752.5	0		0	0	0	0	0	0	0	0	0	0	0
753.5	0		0	0	0	0	0	0	0	0	0	0	0
754.5	0		0	0	0	0	0	0	0	0	0	0	0
755.5	0		0	0	0	0	0	0	0	0	0	0	0
756.5	0		0	0	0	0	0	0	0	0	0	0	0
757.5	0		0	0	0	0	0	0	0	0	0	0	0
758.5	0		0	0	0	0	0	0	0	0	0	0	0
759.5	0		0	0	0	0	0	0	0	0	0	0	0
760.5	0		0	0	0	0	0	0	0	0	0	0	0
761.5	0		0	0	0	0	0	0	0	0	0	0	0
762.5	0		0	0	0	0	0	0	0	0	0	0	0
763.5	0		0	0	0	0	0	0	0	0	0	0	0
764.5	0		0	0	0	0	0	0	0	0	0	0	0
765.5	0		0	0	0	0	0	0	0	0	0	0	0
766.5	0		0	0	0	0	0	0	0	0	0	0	0
767.5	0		0	0	0	0	0	0	0	0	0	0	0
768.5	0		0	0	0	0	0	0	0	0	0	0	0
769.5	0		0	0	0	0	0	0	0	0	0	0	0
770.5	0		0	0	0	0	0	0	0	0	0	0	0
771.5	0		0	0	0	0	0	0	0	0	0	0	0
772.5	0		0	0	0	0	0	0	0	0	0	0	0
773.5	0		0	0	0	0	0	0	0	0	0	0	0
774.5	0		0	0	0	0	0	0	0	0	0	0	0
775.5	0		0	0	0	0	0	0	0	0	0	0	0
776.5	0		0	0	0	0	0	0	0	0	0	0	0
777.5	0		0	0	0	0	0	0	0	0	0	0	0
778.5	0		0	0	0	0	0	0	0	0	0	0	0
779.5	0		0	0	0	0	0	0	0	0	0	0	0
780.5	0		0	0	0	0	0	0	0	0	0	0	0
781.5	0		0	0	0	0	0	0	0	0	0	0	0
782.5	0		0	0	0	0	0	0	0	0	0	0	0
783.5	0		0	0	0	0	0	0	0	0	0	0	0
784.5	0		0	0	0	0	0	0	0	0	0	0	0
785.5	0		0	0	0	0	0	0	0	0	0	0	0
786.5	0		0	0	0	0	0	0	0	0	0	0	0
787.5	0		0	0	0	0	0	0	0	0	0	0	0
788.5	0		0	0	0	0	0	0	0	0	0	0	0
789.5	0		0	0	0	0	0	0	0	0	0	0	0
790.5	0		0	0	0	0	0	0	0	0	0	0	0
791.5	0		0	0	0	0	0	0	0	0	0	0	0
792.5	0		0	0	0	0	0	0	0	0	0	0	0
793.5	0		0	0	0	0	0	0	0	0	0	0	0
794.5	0		0	0	0	0	0	0	0	0	0	0	0
795.5	0		0	0	0	0	0	0	0	0	0	0	0
796.5	0		0	0	0	0	0	0	0	0	0	0	0
797.5	0		0	0	0	0	0	0	0	0	0	0	0
798.5	0		0	0	0	0	0	0	0	0	0	0	0
799.5	0		0	0	0	0	0	0	0	0	0	0	0
800.5	0		0	0	0	0	0	0	0	0	0	0	0
801.5	0		0	0	0	0	0	0	0	0	0	0	0
802.5	0		0	0	0	0	0	0	0	0	0	0	0
803.5	0		0	0	0	0	0	0	0	0	0	0	0
804.5	0		0	0	0	0	0	0	0	0	0	0	0
805.5	0		0	0	0	0	0	0	0	0	0	0	0
806.5	0		0	0	0	0	0	0	0	0	0	0	0
807.5	0		0	0	0	0	0	0	0	0	0	0	0
808.5	0		0	0	0	0	0	0	0	0	0	0	0
809.5	0		0	0	0	0	0	0	0	0	0	0	0
810.5	0		0	0	0	0	0	0	0	0	0	0	0
811.5	0		0	0	0	0	0	0	0	0	0	0	0
812.5	0		0	0	0	0	0	0	0	0	0	0	0
813.5	0		0	0	0	0	0	0	0	0	0	0	0
814.5	0		0	0	0	0	0	0	0	0	0	0	0
815.5	0		0	0	0	0	0	0	0	0	0	0	0
816.5	0		0	0	0	0	0	0	0	0	0	0	0
817.5	0		0	0	0	0	0	0	0	0	0	0	0
818.5	0		0	0	0	0	0	0	0	0	0	0	0
819.5	0		0	0	0	0	0	0	0	0	0	0	0
820.5	0		0	0	0	0	0	0	0	0	0	0	0
821.5	0		0	0	0	0	0	0	0	0	0	0	0
822.5	0		0	0	0	0	0	0	0	0	0	0	0
823.5	0		0	0	0	0	0	0	0	0	0	0	0
824.5	0		0	0	0	0	0	0	0	0	0	0	0
825.5	0		0	0	0	0	0	0	0	0	0	0	0
826.5	0		0	0	0	0	0	0	0	0	0	0	0
827.5	0		0	0	0	0	0	0	0	0	0	0	0
828.5	0		0	0	0	0	0	0	0	0	0	0	0
829.5	0		0	0	0	0	0	0	0	0	0	0	0
830.5	0		0	0	0	0	0	0	0	0	0	0	0
831.5	0		0	0	0	0	0	0	0	0	0	0	0
832.5	0		0	0	0	0	0	0	0	0	0	0	0
833.5	0		0	0	0	0	0	0	0	0	0	0	0
834.5	0		0	0	0	0	0	0	0	0	0	0	0
835.5	0		0	0	0	0	0	0	0	0	0	0	0
836.5	0		0	0	0	0	0	0	0	0	0	0	0
837.5	0		0	0	0	0	0	0	0	0	0	0	0
838.5	0		0	0	0	0	0	0	0	0	0	0	0
839.5	0		0	0	0	0	0	0	0	0	0	0	0
840.5	0		0	0	0	0	0	0	0	0	0	0	0
841.5	0		0	0	0	0	0	0	0	0	0	0	0
842.5	0		0	0	0	0	0	0	0	0	0	0	0
843.5	0		0	0	0	0	0	0	0	0	0	0	0
844.5	0		0	0	0	0	0	0	0	0	0	0	0
845.5	0		0	0	0	0	0	0	0	0	0	0	0
846.5	0		0	0	0	0	0	0	0	0	0	0	0
847.5	0		0	0	0	0	0	0	0	0	0	0	0
848.5	0		0	0	0	0	0	0	0	0	0	0	0
849.5	0		0	0	0	0	0	0	0	0	0	0	0
850.5	0		0	0	0	0	0	0	0	0	0	0	0
851.5	0		0	0	0	0	0	0	0	0	0	0	0
852.5	0		0	0	0	0	0	0	0	0	0	0	0
853.5	0		0	0	0	0	0	0	0	0	0	0	0
854.5	0		0	0	0	0	0	0	0	0	0	0	0
855.5	0		0	0	0	0	0	0	0	0	0	0	0
856.5	0		0	0	0	0	0	0	0	0	0	0	0
857.5	0		0	0	0	0	0	0	0	0	0	0	0
858.5	0		0	0	0	0	0	0	0	0	0	0	0
859.5	0		0	0	0	0	0	0	0	0	0	0	0
860.5	0		0	0	0	0	0	0	0	0	0	0	0
861.5	0		0	0	0	0	0	0	0	0	0	0	0
862.5	0		0	0	0	0	0	0	0	0	0	0	0
863.5	0		0	0	0	0	0	0	0	0	0	0	0
864.5	0		0	0	0	0	0	0	0	0	0	0	0
865.5	0		0	0	0	0	0	0	0	0	0	0	0
866.5	0		0	0	0	0	0	0	0	0	0	0	0
867.5	0		0	0	0	0	0	0	0	0	0	0	0
868.5	0		0	0	0	0	0	0	0	0	0	0	0
869.5	0		0	0	0	0	0	0	0	0	0	0	0
870.5	0		0	0	0	0	0	0	0	0	0	0	0
871.5	0		0	0	0	0	0	0	0	0	0	0	0
872.5	0		0	0	0	0	0	0	0	0	0	0	0
873.5	0		0	0	0	0	0	0	0	0	0	0	0
874.5	0		0	0	0	0	0	0	0	0	0	0	0
875.5	0		0	0	0	0	0	0	0	0	0	0	0
876.5	0		0	0	0	0	0	0	0	0	0	0	0
877.5	0		0	0	0	0	0	0	0	0	0	0	0
878.5	0		0	0	0	0	0	0	0	0	0	0	0
879.5	0		0	0	0	0	0	0	0	0	0	0	0
880.5	0		0	0	0	0	0	0	0	0	0	0	0
881.5	0		0	0	0	0	0	0	0	0	0	0	0
882.5	0		0	0	0	0	0	0	0	0	0	0	0
883.5	0		0	0	0	0	0	0	0	0	0	0	0
884.5	0		0	0	0	0	0	0	0	0	0	0	0
885.5	0		0	0	0	0	0	0	0	0	0	0	0
886.5	0		0	0	0	0	0	0	0	0	0	0	0
887.5	0		0	0	0	0	0	0	0	0	0	0	0
888.5	0		0	0	0	0	0	0	0	0	0	0	0
889.5	0		0	0	0	0	0	0	0	0	0	0	0
890.5	0		0	0	0	0	0	0	0	0	0	0	0
891.5	0		0	0	0	0	0	0	0	0	0	0	0
892.5	0		0	0	0	0	0	0	0	0	0	0	0
893.5	0		0	0	0	0	0	0	0	0	0	0	0
894.5	0		0	0	0	0	0	0	0	0	0	0	0
895.5	0		0	0	0	0	0	0	0	0	0	0	0
896.5	0		0	0	0	0	0	0	0	0	0	0	0
897.5	0		0	0	0	0	0	0	0	0	0	0	0
898.5	0		0	0	0	0	0	0	0	0	0	0	0
899.5	0		0	0	0	0	0	0	0	0	0	0	0
900.5	0		0	0	0	0	0	0	0	0	0	0	0
901.5	0		0	0	0	0	0	0	0	0	0	0	0
902.5	0		0	0	0	0	0	0	0	0	0	0	0
903.5	0		0	0	0	0	0	0	0	0	0	0	0
904.5	0		0	0	0	0	0	0	0	0	0	0	0
905.5	0		0	0	0	0	0	0	0	0	0	0	0
906.5	0		0	0	0	0	0	0	0	0	0	0	0
907.5	0		0	0	0	0	0	0	0	0	0	0	0
908.5	0		0	0	0	0	0	0	0	0	0	0	0
909.5	0		0	0	0	0	0	0	0	0	0	0	0
910.5	0		0	0	0	0	0	0	0	0	0	0	0
911.5	0		0	0	0	0	0	0	0	0	0	0	0
912.5	0		0	0	0	0	0	0	0	0	0	0	0
913.5	0		0	0	0	0	0	0	0	0	0	0	0
914.5	0		0	0	0	0	0	0	0	0	0	0	0
915.5	0		0	0	0	0	0	0	0	0	0	0	0
916.5	0		0	0	0	0	0	0	0	0	0	0	0
917.5	0		0	0	0	0	0	0	0	0	0	0	0
918.5	0		0	0	0	0	0	0	0	0	0	0	0
919.5	0		0	0	0	0	0	0	0	0	0	0	0
920.5	0		0	0	0	0	0	0	0	0	0	0	0
921.5	0		0	0	0	0	0	0	0	0	0	0	0
922.5	0		0	0	0	0	0	0	0	0	0	0	0
923.5	0		0	0	0	0	0	0	0	0	0	0	0
924.5	0		0	0	0	0	0	0	0	0	0	0	0
925.5	0		0	0	0	0	0	0	0	0	0	0	0
926.5	0		0	0	0	0	0	0	0	0	0	0	0
927.5	0		0	0	0	0	0	0	0	0	0	0	0
928.5	0		0	0	0	0	0	0	0	0	0	0	0
929.5	0		0	0	0	0	0	0	0	0	0	0	0
930.5	0		0	0	0	0	0	0	0	0	0	0	0
931.5	0		0	0	0	0	0	0	0	0	0	0	0
932.5	0		0	0	0	0	0	0	0	0	0	0	0
933.5	0		0	0	0	0	0	0	0	0	0	0	0
934.5	0		0	0	0	0	0	0	0	0	0	0	0
935.5	0		0	0	0	0	0	0	0	0	0	0	0
936.5	0		0	0	0	0	0	0	0	0	0	0	0
937.5	0		0	0	0	0	0	0	0	0	0	0	0
938.5	0		0	0	0	0	0	0	0	0	0	0	0
939.5	0		0	0	0	0	0	0	0	0	0	0	0
940.5	0		0	0	0	0	0	0	0	0	0	0	0
941.5	0		0	0	0	0	0	0	0	0	0	0	0
942.5	0		0	0	0	0	0	0	0	0	0	0	0
943.5	0		0	0	0	0	0	0	0	0	0	0	0
944.5	0		0	0	0	0	0	0	0	0	0	0	0
945.5	0		0	0	0	0	0	0	0	0	0	0	0
946.5	0		0	0	0	0	0	0	0	0	0	0	0
947.5	0		0	0	0	0	0	0	0	0	0	0	0
948.5	0		0	0	0	0	0	0	0	0	0	0	0
949.5	0		0	0	0	0	0	0	0	0	0	0	0
950.5	0		0	0	0	0	0	0	0	0	0	0	0
951.5	0		0	0	0	0	0	0	0	0	0	0	0
952.5	0		0	0	0	0	0	0	0	0	0	0	0
953.5	0		0	0	0	0	0	0	0	0	0	0	0
954.5	0		0	0	0	0	0	0	0	0	0	0	0
955.5	0		0	0	0	0	0	0	0	0	0	0	0
956.5	0		0	0	0	0	0	0	0	0	0	0	0
957.5	0		0	0	0	0	0	0	0	0	0	0	0
958.5	0		0	0	0	0	0	0	0	0	0	0	0
959.5	0		0	0	0	0	0	0	0	0	0	0	0
960.5	0		0	0	0	0	0	0	0	0	0	0	0
961.5	0		0	0	0	0	0	0	0	0	0	0	0
962.5	0		0	0	0	0	0	0	0	0	0	0	0
963.5	0		0	0	0	0	0	0	0	0	0	0	0
964.5	0		0	0	0	0	0	0	0	0	0	0	0
965.5	0		0	0	0	0	0	0	0	0	0	0	0
966.5	0		0	0	0	0	0	0	0	0	0	0	0
967.5	0		0	0	0	0	0	0	0	0	0	0	0
968.5	0		0	0	0	0	0	0	0	0	0	0	0
969.5	0		0	0	0	0	0	0	0	0	0	0	0
970.5	0		0	0	0	0	0	0	0	0	0	0	0
971.5	0		0	0	0	0	0	0	0	0	0	0	0
972.5	0		0	0	0	0	0	0	0	0	0	0	0
973.5	0		0	0	0	0	0	0	0	0	0	0	0
974.5	0		0	0	0	0	0	0	0	0	0	0	0
975.5	0		0	0	0	0	0	0	0	0	0	0	0
976.5	0		0	0	0	0	0	0	0	0	0	0	0
977.5	0		0	0	0	0	0	0	0	0	0	0	0
978.5	0		0	0	0	0	0	0	0	0	0	0	0
979.5	0		0	0	0	0	0	0	0	0	0	0	0
980.5	0		0	0	0	0	0	0	0	0	0	0	0
981.5	0		0	0	0	0	0	0	0	0	0	0	0
982.5	0		0	0	0	0	0	0	0	0	0	0	0
983.5	0		0	0	0	0	0	0	0	0	0	0	0
984.5	0		0	0	0	0	0	0	0	0	0	0	0
985.5	0		0	0	0	0	0	0	0	0	0	0	0
986.5	0		0	0	0	0	0	0	0	0	0	0	0
987.5	0		0	0	0	0	0	0	0	0	0	0	0
988.5	0		0	0	0	0	0	0	0	0	0	0	0
989.5	0		0	0	0	0	0	0	0	0	0	0	0
990.5	0		0	0	0	0	0	0	0	0	0	0	0
991.5	0		0	0	0	0	0	0	0	0	0	0	0
992.5	0		0	0	0	0	0	0	0	0	0	0	0
993.5	0		0	0	0	0	0	0	0	0	0	0	0
994.5	0		0	0	0	0	0	0	0	0	0	0	0
995.5	0		0	0	0	0	0	0	0	0	0	0	0
996.5	0		0	0	0	0	0	0	0	0	0	0	0
997.5	0		0	0	0	0	0	0	0	0	0	0	0
998.5	0		0	0	0	0	0	0	0	0	0	0	0
999.5	0		0	0	0	0	0	0	0	0	0	0	0
1000.5	0		0	0	0	0	0	0	0	0	0	0	0
1001.5	0		0	0	0	0	0	0	0	0	0	0	0
1002.5	0		0	0	0	0	0	0	0	0	0	0	0
1003.5	0		0	0	0	0	0	0	0	0	0	0	0
1004.5	0		0	0	0	0	0	0	0	0	0	0	0
1005.5	0		0	0	0	0	0	0	0	0	0	0	0
1006.5	0		0	0	0	0	0	0	0	0	0	0	0
1007.5	0		0	0	0	0	0	0	0	0	0	0	0
1008.5	0		0	0	0	0	0	0	0	0	0	0	0
1009.5	0		0	0	0	0	0	0	0	0	0	0	0
1010.5	0		0	0	0	0	0	0	0	0	0	0	0
1011.5	0		0	0	0	0	0	0	0	0	0	0	0
1012.5	1		0	0	0	0	0	0	0	0.125	0.133631	0.258631	-0.00863062
1013.5	0		0	0	0	0	0	0	0	0	0	0	0
1014.5	0		0	0	0	0	0	0	0	0	0	0	0
1015.5	0		0	0	0	0	0	0	0	0	0	0	0
1016.5	0		0	0	0	0	0	0	0	0	0	0	0
1017.5	0		0	0	0	0	0	0	0	0	0	0	0
1018.5	0		0	0	0	0	0	0	0	0	0	0	0
1019.5	0		0	0	0	0	0	0	0	0	0	0	0
1020.5	0		0	0	0	0	0	0	0	0	0	0	0
1021.5	0		0	0	0	0	0	0	0	0	0	0	0
1022.5	0		0	0	0	0	0	0	0	0	0	0	0
1023.5	0		0	0	0	0	0	0	0	0	0	0	0
1024.5	0		0	0	0	0	0	0	0	0	0	0	0
1025.5	0		0	0	0	0	0	0	0	0	0	0	0
1026.5	0		0	0	0	0	0	0	0	0	0	0	0
1027.5	0		0	0	0	0	0	0	0	0	0	0	0
1028.5	0		0	0	0	0	0	0	0	0	0	0	0
1029.5	0		0	0	0	0	0	0	0	0	0	0	0
1030.5	0		0	0	0	0	0	0	0	0	0	0	0
1031.5	0		0	0	0	0	0	0	0	0	0	0	0
1032.5	0		0	0	0	0	0	0	0	0	0	0	0
1033.5	0		0	0	0	0	0	0	0	0	0	0	0
1034.5	0		0	0	0	0	0	0	0	0	0	0	0
1035.5	0		0	0	0	0	0	0	0	0	0	0	0
1036.5	0		0	0	0	0	0	0	0	0	0	0	0
1037.5	0		0	0	0	0	0	0	0	0	0	0	0
1038.5	0		0	0	0	0	0	0	0	0	0	0	0
1039.5	0		0	0	0	0	0	0	0	0	0	0	0
1040.5	0		0	0	0	0	0	0	0	0	0	0	0
1041.5	0		0	0	0	0	0	0	0	0	0	0	0
1042.5	0		0	0	0	0	0	0	0	0	0	0	0
1043.5	0		0	0	0	0	0	0	0	0	0	0	0
1044.5	0		0	0	0	0	0	0	0	0	0	0	0
1045.5	0		0	0	0	0	0	0	0	0	0	0	0
1046.5	0		0	0	0	0	0	0	0	0	0	0	0
1047.5	0		0	0	0	0	0	0	0	0	0	0	0
1048.5	0		0	0	0	0	0	0	0	0	0	0	0
1049.5	0		0	0	0	0	0	0	0	0	0	0	0
1050.5	0		0	0	0	0	0	0	0	0	0	0	0
1051.5	0		0	0	0	0	0	0	0	0	0	0	0
1052.5	0		0	0	0	0	0	0	0	0	0	0	0
1053.5	0		0	0	0	0	0	0	0	0	0	0	0
1054.5	0		0	0	0	0	0	0	0	0	0	0	0
1055.5	0		0	0	0	0	0	0	0	0	0	0	0
1056.5	0		0	0	0	0	0	0	0	0	0	0	0
1057.5	0		0	0	0	0	0	0	0	0	0	0	0
1058.5	0		0	0	0	0	0	0	0	0	0	0	0
1059.5	0		0	0	0	0	0	0	0	0	0	0	0
1060.5	0		0	0	0	0	0	0	0	0	0	0	0
1061.5	0		0	0	0	0	0	0	0	0	0	0	0
1062.5	0		0	0	0	0	0	0	0	0	0	0	0
1063.5	0		0	0	0	0	0	0	0	0	0	0	0
1064.5	0		0	0	0	0	0	0	0	0	0	0	0
1065.5	0		0	0	0	0	0	0	0	0	0	0	0
1066.5	0		0	0	0	0	0	0	0	0	0	0	0
1067.5	0		0	0	0	0	0	0	0	0	0	0	0
1068.5	0		0	0	0	0	0	0	0	0	0	0	0
1069.5	0		0	0	0	0	0	0	0	0	0	0	0
1070.5	0		0	0	0	0	0	0	0	0	0	0	0
1071.5	0		0	0	0	0	0	0	0	0	0	0	0
1072.5	0		0	0	0	0	0	0	0	0	0	0	0
1073.5	0		0	0	0	0	0	0	0	0	0	0	0
1074.5	0		0	0	0	0	0	0	0	0	0	0	0
1075.5	0		0	0	0	0	0	0	0	0	0	0	0
1076.5	0		0	0	0	0	0	0	0	0	0	0	0
1077.5	0		0	0	0	0	0	0	0	0	0	0	0
1078.5	0		0	0	0	0	0	0	0	0	0	0	0
1079.5	0		0	0	0	0	0	0	0	0	0	0	0
1080.5	0		0	0	0	0	0	0	0	0	0	0	0
1081.5	0		0	0	0	0	0	0	0	0	0	0	0
1082.5	0		0	0	0	0	0	0	0	0	0	0	0
1083.5	0		0	0	0	0	0	0	0	0	0	0	0
1084.5	0		0	0	0	0	0	0	0	0	0	0	0
1085.5	0		0	0	0	0	0	0	0	0	0	0	0
1086.5	0		0	0	0	0	0	0	0	0	0	0	0
1087.5	0		0	0	0	0	0	0	0	0	0	0	0
1088.5	0		0	0	0	0	0	0	0	0	0	0	0
1089.5	0		0	0	0	0	0	0	0	0	0	0	0
1090.5	0		0	0	0	0	0	0	0	0	0	0	0
1091.5	0		0	0	0	0	0	0	0	0	0	0	0
1092.5	0		0	0	0	0	0	0	0	0	0	0	0
1093.5	0		0	0	0	0	0	0	0	0	0	0	0
1094.5	0		0	0	0	0	0	0	0	0	0	0	0
1095.5	0		0	0	0	0	0	0	0	0	0	0	0
1096.5	0		0	0	0	0	0	0	0	0	0	0	0
1097.5	0		0	0	0	0	0	0	0	0	0	0	0
1098.5	0		0	0	0	0	0	0	0	0	0	0	0
1099.5	0		0	0	0	0	0	0	0	0	0	0	0
1100.5	0		0	0	0	0	0	0	0	0	0	0	0
1101.5	0		0	0	0	0	0	0	0	0	0	0	0
1102.5	0		0	0	0	0	0	0	0	0	0	0	0
1103.5	0		0	0	0	0	0	0	0	0	0	0	0
1104.5	0		0	0	0	0	0	0	0	0	0	0	0
1105.5	0		0	0	0	0	0	0	0	0	0	0	0
1106.5	0		0	0	0	0	0	0	0	0	0	0	0
1107.5	0		0	0	0	0	0	0	0	0	0	0	0
1108.5	0		0	0	0	0	0	0	0	0	0	0	0
1109.5	0		0	0	0	0	0	0	0	0	0	0	0
1110.5	0		0	0	0	0	0	0	0	0	0	0	0
1111.5	0		0	0	0	0	0	0	0	0	0	0	0
1112.5	0		0	0	0	0	0	0	0	0	0	0	0
1113.5	0		0	0	0	0	0	0	0	0	0	0	0
1114.5	0		0	0	0	0	0	0	0	0	0	0	0
1115.5	0		0	0	0	0	0	0	0	0	0	0	0
1116.5	0		0	0	0	0	0	0	0	0	0	0	0
1117.5	0		0	0	0	0	0	0	0	0	0	0	0
1118.5	0		0	0	0	0	0	0	0	0	0	0	0
1119.5	0		0	0	0	0	0	0	0	0	0	0	0
1120.5	0		0	0	0	0	0	0	0	0	0	0	0
1121.5	0		0	0	0	0	0	0	0	0	0	0	0
1122.5	0		0	0	0	0	0	0	0	0	0	0	0
1123.5	0		0	0	0	0	0	0	0	0	0	0	0
1124.5	0		0	0	0	0	0	0	0	0	0	0	0
1125.5	0		0	0	0	0	0	0	0	0	0	0	0
1126.5	0		0	0	0	0	0	0	0	0	0	0	0
1127.5	0		0	0	0	0	0	0	0	0	0	0	0
1128.5	0		0	0	0	0	0	0	0	0	0	0	0
1129.5	0		0	0	0	0	0	0	0	0	0	0	0
1130.5	0		0	0	0	0	0	0	0	0	0	0	0
1131.5	0		0	0	0	0	0	0	0	0	0	0	0
1132.5	0		0	0	0	0	0	0	0	0	0	0	0
1133.5	0		0	0	0	0	0	0	0	0	0	0	0
1134.5	0		0	0	0	0	0	0	0	0	0	0	0
1135.5	0		0	0	0	0	0	0	0	0	0	0	0
1136.5	0		0	0	0	0	0	0	0	0	0	0	0
1137.5	0		0	0	0	0	0	0	0	0	0	0	0
1138.5	0		0	0	0	0	0	0	0	0	0	0	0
1139.5	0		0	0	0	0	0	0	0	0	0	0	0
1140.5	0		0	0	0	0	0	0	0	0	0	0	0
1141.5	0		0	0	0	0	0	0	0	0	0	0	0
1142.5	0		0	0	0	0	0	0	0	0	0	0	0
1143.5	0		0	0	0	0	0	0	0	0	0	0	0
1144.5	0		0	0	0	0	0	0	0	0	0	0	0
1145.5	0		0	0	0	0	0	0	0	0	0	0	0
1146.5	0		0	0	0	0	0	0	0	0	0	0	0
1147.5	0		0	0	0	0	0	0	0	0	0	0	0
1148.5	0		0	0	0	0	0	0	0	0	0	0	0
1149.5	0		0	0	0	0	0	0	0	0	0	0	0
1150.5	0		0	0	0	0	0	0	0	0	0	0	0
1151.5	0		0	0	0	0	0	0	0	0	0	0	0
1152.5	0		0	0	0	0	0	0	0	0	0	0	0
1153.5	0		0	0	0	0	0	0	0	0	0	0	0
1154.5	0		0	0	0	0	0	0	0	0	0	0	0
1155.5	0		0	0	0	0	0	0	0	0	0	0	0
1156.5	0		0	0	0	0	0	0	0	0	0	0	0
1157.5	0		0	0	0	0	0	0	0	0	0	0	0
1158.5	0		0	0	0	0	0	0	0	0	0	0	0
1159.5	0		0	0	0	0	0	0	0	0	0	0	0
1160.5	0		0	0	0	0	0	0	0	0	0	0	0
1161.5	0		0	0	0	0	0	0	0	0	0	0	0
1162.5	0		0	0	0	0	0	0	0	0	0	0	0
1163.5	0		0	0	0	0	0	0	0	0	0	0	0
1164.5	0		0	0	0	0	0	0	0	0	0	0	0
1165.5	0		0	0	0	0	0	0	0	0	0	0	0
1166.5	0		0	0	0	0	0	0	0	0	0	0	0
1167.5	0		0	0	0	0	0	0	0	0	0	0	0
1168.5	0		0	0	0	0	0	0	0	0	0	0	0
1169.5	0		0	0	0	0	0	0	0	0	0	0	0
1170.5	0		0	0	0	0	0	0	0	0	0	0	0
1171.5	0		0	0	0	0	0	0	0	0	0	0	0
1172.5	0		0	0	0	0	0	0	0	0	0	0	0
1173.5	0		0	0	0	0	0	0	0	0	0	0	0
1174.5	0		0	0	0	0	0	0	0	0	0	0	0
1175.5	0		0	0	0	0	0	0	0	0	0	0	0
1176.5	0		0	0	0	0	0	0	0	0	0	0	0
1177.5	0		0	0	0	0	0	0	0	0	0	0	0
1178.5	0		0	0	0	0	0	0	0	0	0	0	0
1179.5	0		0	0	0	0	0	0	0	0	0	0	0
1180.5	0		0	0	0	0	0	0	0	0	0	0	0
1181.5	0		0	0	0	0	0	0	0	0	0	0	0
1182.5	0		0	0	0	0	0	0	0	0	0	0	0
1183.5	0		0	0	0	0	0	0	0	0	0	0	0
1184.5	0		0	0	0	0	0	0	0	0	0	0	0
1185.5	0		0	0	0	0	0	0	0	0	0	0	0
1186.5	0		0	0	0	0	0	0	0	0	0	0	0
1187.5	0		0	0	0	0	0	0	0	0	0	0	0
1188.5	0		0	0	0	0	0	0	0	0	0	0	0
1189.5	0		0	0	0	0	0	0	0	0	0	0	0
1190.5	0		0	0	0	0	0	0	0	0	0	0	0
1191.5	0		0	0	0	0	0	0	0	0	0	0	0
1192.5	0		0	0	0	0	0	0	0	0	0	0	0
1193.5	0		0	0	0	0	0	0	0	0	0	0	0
1194.5	0		0	0	0	0	0	0	0	0	0	0	0
1195.5	0		0	0	0	0	0	0	0	0	0	0	0
1196.5	0		0	0	0	0	0	0	0	0	0	0	0
1197.5	0		0	0	0	0	0	0	0	0	0	0	0
1198.5	0		0	0	0	0	0	0	0	0	0	0	0
1199.5	0		0	0	0	0	0	0	0	0	0	0	0
1200.5	0		0	0	0	0	0	0	0	0	0	0	0
1201.5	0		0	0	0	0	0	0	0	0	0	0	0
1202.5	0		0	0	0	0	0	0	0	0	0	0	0
1203.5	0		0	0	0	0	0	0	0	0	0	0	0
1204.5	0		0	0	0	0	0	0	0	0	0	0	0
1205.5	0		0	0	0	0	0	0	0	0	0	0	0
1206.5	0		0	0	0	0	0	0	0	0	0	0	0
1207.5	0		0	0	0	0	0	0	0	0	0	0	0
1208.5	0		0	0	0	0	0	0	0	0	0	0	0
1209.5	0		0	0	0	0	0	0	0	0	0	0	0
1210.5	0		0	0	0	0	0	0	0	0	0	0	0
1211.5	0		0	0	0	0	0	0	0	0	0	0	0
1212.5	0		0	0	0	0	0	0	0	0	0	0	0
1213.5	0		0	0	0	0	0	0	0	0	0	0	0
1214.5	0		0	0	0	0	0	0	0	0	0	0	0
1215.5	0		0	0	0	0	0	0	0	0	0	0	0
1216.5	0		0	0	0	0	0	0	0	0	0	0	0
1217.5	0		0	0	0	0	0	0	0	0	0	0	0
1218.5	0		0	0	0	0	0	0	0	0	0	0	0
1219.5	0		0	0	0	0	0	0	0	0	0	0	0
1220.5	0		0	0	0	0	0	0	0	0	0	0	0
1221.5	0		0	0	0	0	0	0	0	0	0	0	0
1222.5	0		0	0	0	0	0	0	0	0	0	0	0
1223.5	0		0	0	0	0	0	0	0	0	0	0	0
1224.5	0		0	0	0	0	0	0	0	0	0	0	0
1225.5	0		0	0	0	0	0	0	0	0	0	0	0
1226.5	0		0	0	0	0	0	0	0	0	0	0	0
1227.5	0		0	0	0	0	0	0	0	0	0	0	0
1228.5	0		0	0	0	0	0	0	0	0	0	0	0
1229.5	0		0	0	0	0	0	0	0	0	0	0	0
1230.5	0		0	0	0	0	0	0	0	0	0	0	0
1231.5	0		0	0	0	0	0	0	0	0	0	0	0
1232.5	0		0	0	0	0	0	0	0	0	0	0	0
1233.5	0		0	0	0	0	0	0	0	0	0	0	0
1234.5	0		0	0	0	0	0	0		0	0	0	0
1235.5	0		0	0	0	0	0	0		0	0	0	0
1236.5	0		0	0	0	0	0	0		0	0	0	0
1237.5	0		0	0	0	0	0	0		0	0	0	0
1238.5	0		0	0	0	0	0	0		0	0	0	0
1239.5	0		0	0	0	0	0	0		0	0	0	0
1240.5	0		0	0	0	0	0	0		0	0	0	0
1241.5	0		0	0	0	0	0	0		0	0	0	0
1242.5	0		0	0	0	0	0	0		0	0	0	0
1243.5	0		0	0	0	0	0	0		0	0	0	0
1244.5	0		0	0	0	0	0	0		0	0	0	0
1245.5	0		0	0	0	0	0	0		0	0	0	0
1246.5	0		0	0	0	0	0	0		0	0	0	0
1247.5	0		0	0	0	0	0	0		0	0	0	0
1248.5	0		0	0	0	0	0	0		0	0	0	0
1249.5	0		0	0	0	0	0	0		0	0	0	0
1250.5	0		0	0	0	0	0	0		0	0	0	0
1251.5	0		0	0	0	0	0	0		0	0	0	0
1252.5	0		0	0	0	0	0	0		0	0	0	0
1253.5	0		0	0	0	0	0	0		0	0	0	0
1254.5	0		0	0	0	0	0	0		0	0	0	0
1255.5	0		0	0	0	0	0	0		0	0	0	0
1256.5	0		0	0	0	0	0	0		0	0	0	0
1257.5	0		0	0	0	0	0	0		0	0	0	0
1258.5	0		0	0	0	0	0	0		0	0	0	0
1259.5	0		0	0	0	0	0	0		0	0	0	0
1260.5	0		0	0	0	0	0	0		0	0	0	0
1261.5	0		0	0	0	0	0	0		0	0	0	0
1262.5	0		0	0	0	0	0	0		0	0	0	0
1263.5	0		0	0	0	0	0	0		0	0	0	0
1264.5	0		0	0	0	0	0	0		0	0	0	0
1265.5	0		0	0	0	0	0	0		0	0	0	0
1266.5	0		0	0	0	0	0	0		0	0	0	0
1267.5	0		0	0	0	0	0	0		0	0	0	0
1268.5	0		0	0	0	0	0	0		0	0	0	0
1269.5	0		0	0	0	0	0	0		0	0	0	0
1270.5	0		0	0	0	0	0	0		0	0	0	0
1271.5	0		0	0	0	0	0	0		0	0	0	0
1272.5	0		0	0	0	0	0	0		0	0	0	0
1273.5	0		0	0	0	0	0	0		0	0	0	0
1274.5	0		0	0	0	0	0	0		0	0	0	0
1275.5	0		0	0	0	0	0	0		0	0	0	0
1276.5	0		0	0	0	0	0	0		0	0	0	0
1277.5	0		0	0	0	0	0	0		0	0	0	0
1278.5	0		0	0	0	0	0	0		0	0	0	0
1279.5	0		0	0	0	0	0	0		0	0	0	0
1280.5	0		0	0	0	0	0	0		0	0	0	0
1281.5	0		0	0	0	0	0	0		0	0	0	0
1282.5	0		0	0	0	0	0	0		0	0	0	0
1283.5	0		0	0	0	0	0	0		0	0	0	0
1284.5	0		0	0	0	0	0	0		0	0	0	0
1285.5	0		0	0	0	0	0	0		0	0	0	0
1286.5	0		0	0	0	0	0	0		0	0	0	0
1287.5	0		0	0	0	0	0	0		0	0	0	0
1288.5	0		0	0	0	0	0	0		0	0	0	0
1289.5	0		0	0	0	0	0	0		0	0	0	0
1290.5	0		0	0	0	0	0	0		0	0	0	0
1291.5	0		0	0	0	0	0	0		0	0	0	0
1292.5	0		0	0	0	0	0	0		0	0	0	0
1293.5	0		0	0	0	0	0	0		0	0	0	0
1294.5	0		0	0	0	0	0	0		0	0	0	0
1295.5	0		0	0	0	0	0	0		0	0	0	0
1296.5	0		0	0	0	0	0	0		0	0	0	0
1297.5	0		0	0	0	0	0	0		0	0	0	0
1298.5	0		0	0	0	0	0	0		0	0	0	0
1299.5	0		0	0	0	0	0	0		0	0	0	0
1300.5	0		0	0	0	0	0	0		0	0	0	0
1301.5	0		0	0	0	0	0	0		0	0	0	0
1302.5	0		0	0	0	0	0	0		0	0	0	0
1303.5	0		0	0	0	0	0	0		0	0	0	0
1304.5	0		0	0	0	0	0	0		0	0	0	0
1305.5	0		0	0	0	0	0	0		0	0	0	0
1306.5	0		0	0	0	0	0	0		0	0	0	0
1307.5	0		0	0	0	0	0	0		0	0	0	0
1308.5	0		0	0	0	0	0	0		0	0	0	0
1309.5	0		0	0	0	0	0	0		0	0	0	0
1310.5	0		0	0	0	0	0	0		0	0	0	0
1311.5	0		0	0	0	0	0	0		0	0	0	0
1312.5	0		0	0	0	0	0	0		0	0	0	0
1313.5	0		0	0	0	0	0	0		0	0	0	0
1314.5	0		0	0	0	0	0	0		0	0	0	0
1315.5	0		0	0	0	0	0	0		0	0	0	0
1316.5	0		0	0	0	0	0	0		0	0	0	0
1317.5	0		0	0	0	0	0	0		0	0	0	0
1318.5	0		0	0	0	0	0	0		0	0	0	0
1319.5	0		0	0	0	0	0	0		0	0	0	0
1320.5	0		0	0	0	0	0	0		0	0	0	0
1321.5	0		0	0	0	0	0	0		0	0	0	0
1322.5	0		0	0	0	0	0	0		0	0	0	0
1323.5	0		0	0	0	0	0	0		0	0	0	0
1324.5	0		0	0	0	0	0	0		0	0	0	0
1325.5	0		0	0	0	0	0	0		0	0	0	0
1326.5	0		0	0	0	0	0	0		0	0	0	0
1327.5	0		0	0	0	0	0	0		0	0	0	0
1328.5	0		0	0	0	0	0	0		0	0	0	0
1329.5	0		0	0	0	0	0	0		0	0	0	0
1330.5	0		0	0	0	0	0	0		0	0	0	0
1331.5	0		0	0	0	0	0	0		0	0	0	0
1332.5	0		0	0	0	0	0	0		0	0	0	0
1333.5	0		0	0	0	0	0	0		0	0	0	0
1334.5	0		0	0	0	0	0	0		0	0	0	0
1335.5	0		0	0	0	0	0	0		0	0	0	0
1336.5	0		0	0	0	0	0	0		0	0	0	0
1337.5	0		0	0	0	0	0	0		0	0	0	0
1338.5	0		0	0	0	0	0	0		0	0	0	0
1339.5	0		0	0	0	0	0	0		0	0	0	0
1340.5	0		0	0	0	0	0	0		0	0	0	0
1341.5	0		0	0	0	0	0	0		0	0	0	0
1342.5	0		0	0	0	0	0	0		0	0	0	0
1343.5	0		0	0	0	0	0	0		0	0	0	0
1344.5	0		0	0	0	0	0	0		0	0	0	0
1345.5	0		0	0	0	0	0	0		0	0	0	0
1346.5	0		0	0	0	0	0	0		0	0	0	0
1347.5	0		0	0	0	0	0	0		0	0	0	0
1348.5	0		0	0	0	0	0	0		0	0	0	0
1349.5	0		0	0	0	0	0	0		0	0	0	0
1350.5	0		0	0	0	0	0	0		0	0	0	0
1351.5	0		0	0	0	0	0	0		0	0	0	0
1352.5	0		0	0	0	0	0	0		0	0	0	0
1353.5	0		0	0	0	0	0	0		0	0	0	0
1354.5	0		0	0	0	0	0	0		0	0	0	0
1355.5	0		0	0	0	0	0	0		0	0	0	0
1356.5	0		0	0	0	0	0	0		0	0	0	0
1357.5	0		0	0	0	0	0	0		0	0	0	0
1358.5	0		0	0	0	0	0	0		0	0	0	0
1359.5	0		0	0	0	0	0	0		0	0	0	0
1360.5	0		0	0	0	0	0	0		0	0	0	0
1361.5	0		0	0	0	0	0	0		0	0	0	0
1362.5	0		0	0	0	0	0	0		0	0	0	0
1363.5	0		0	0	0	0	0	0		0	0	0	0
1364.5	0		0	0	0	0	0	0		0	0	0	0
1365.5	0		0	0	0	0	0	0		0	0	0	0
1366.5	0		0	0	0	0	0	0		0	0	0	0
1367.5	0		0	0	0	0	0	0		0	0	0	0
1368.5	0		0	0	0	0	0	0		0	0	0	0
1369.5	0		0	0	0	0	0	0		0	0	0	0
1370.5	0		0	0	0	0	0	0		0	0	0	0
1371.5	0		0	0	0	0	0	0		0	0	0	0
1372.5	0		0	0	0	0	0	0		0	0	0	0
1373.5	0		0	0	0	0	0	0		0	0	0	0
1374.5	0		0	0	0	0	0	0		0	0	0	0
1375.5	0		0	0	0	0	0	0		0	0	0	0
1376.5	0		0	0	0	0	0	0		0	0	0	0
1377.5	0		0	0	0	0	0	0		0	0	0	0
1378.5	0		0	0	0	0	0	0		0	0	0	0
1379.5	0		0	0	0	0	0	0		0	0	0	0
1380.5	0		0	0	0	0	0	0		0	0	0	0
1381.5	0		0	0	0	0	0	0		0	0	0	0
1382.5	0		0	0	0	0	0	0		0	0	0	0
1383.5	0		0	0	0	0	0	0		0	0	0	0
1384.5	0		0	0	0	0	0	0		0	0	0	0
1385.5	0		0	0	0	0	0	0		0	0	0	0
1386.5	0		0	0	0	0	0	0		0	0	0	0
1387.5	0		0	0	0	0	0	0		0	0	0	0
1388.5	0		0	0	0	0	0	0		0	0	0	0
1389.5	0		0	0	0	0	0	0		0	0	0	0
1390.5	0		0	0	0	0	0	0		0	0	0	0
1391.5	0		0	0	0	0	0	0		0	0	0	0
1392.5	0		0	0	0	0	0	0		0	0	0	0
1393.5	0		0	0	0	0	0	0		0	0	0	0
1394.5	0		0	0	0	0	0	0		0	0	0	0
1395.5	0		0	0	0	0	0	0		0	0	0	0
1396.5	0		0	0	0	0	0	0		0	0	0	0
1397.5	0		0	0	0	0	0	0		0	0	0	0
1398.5	0		0	0	0	0	0	0		0	0	0	0
1399.5	0		0	0	0	0	0	0		0	0	0	0
1400.5	0		0	0	0	0	0	0		0	0	0	0
1401.5	0		0	0	0	0	0	0		0	0	0	0
1402.5	0		0	0	0	0	0	0		0	0	0	0
1403.5	0		0	0	0	0	0	0		0	0	0	0
1404.5	0		0	0	0	0	0	0		0	0	0	0
1405.5	0		0	0	0	0	0	0		0	0	0	0
1406.5	0		0	0	0	0	0	0		0	0	0	0
1407.5	0		0	0	0	0	0	0		0	0	0	0
1408.5	0		0	0	0	0	0	0		0	0	0	0
1409.5	0		0	0	0	0	0	0		0	0	0	0
1410.5	0		0	0	0	0	0	0		0	0	0	0
1411.5	0		0	0	0	0	0	0		0	0	0	0
1412.5	0		0	0	0	0	0	0		0	0	0	0
1413.5	0		0	0	0	0	0	0		0	0	0	0
1414.5	0		0	0	0	0	0	0		0	0	0	0
1415.5	0		0	0	0	0	0	0		0	0	0	0
1416.5	0		0	0	0	0	0	0		0	0	0	0
1417.5	0		0	0	0	0	0	0		0	0	0	0
1418.5	0		0	0	0	0	0	0		0	0	0	0
1419.5	0		0	0	0	0	0	0		0	0	0	0
1420.5	0		0	0	0	0	0	0		0	0	0	0
1421.5	0		0	0	0	0	0	0		0	0	0	0
1422.5	0		0	0	0	0	0	0		0	0	0	0
1423.5	0		0	0	0	0	0	0		0	0	0	0
1424.5	0		0	0	0	0	0	0		0	0	0	0
1425.5	0		0	0	0	0	0	0		0	0	0	0
1426.5	0		0	0	0	0	0	0		0	0	0	0
1427.5	0		0	0	0	0	0	0		0	0	0	0
1428.5	0		0	0	0	0	0	0		0	0	0	0
1429.5	0		0	0	0	0	0	0		0	0	0	0
1430.5	0		0	0	0	0	0	0		0	0	0	0
1431.5	0		0	0	0	0	0	0		0	0	0	0
1432.5	0		0	0	0	0	0	0		0	0	0	0
1433.5	0		0	0	0	0	0	0		0	0	0	0
1434.5	0		0	0	0	0	0	0		0	0	0	0
1435.5	0		0	0	0	0	0	0		0	0	0	0
1436.5	0		0	0	0	0	0	0		0	0	0	0
1437.5	0		0	0	0	0	0	0		0	0	0	0
1438.5	0		0	0	0	0	0	0		0	0	0	0
1439.5	0		0	0	0	0	0	0		0	0	0	0
1440.5	0		0	0	0	0	0	0		0	0	0	0
1441.5	0		0	0	0	0	0	0		0	0	0	0
1442.5	0		0	0	0	0	0	0		0	0	0	0
1443.5	0		0	0	0	0	0	0		0	0	0	0
1444.5	0		0	0	0	0	0	0		0	0	0	0
1445.5	0		0	0	0	0	0	0		0	0	0	0
1446.5	0		0	0	0	0	0	0		0	0	0	0
1447.5	0		0	0	0	0	0	0		0	0	0	0
1448.5	0		0	0	0	0	0	0		0	0	0	0
1449.5	0		0	0	0	0	0	0		0	0	0	0
1450.5	0		0	0	0	0	0	0		0	0	0	0
1451.5	0		0	0	0	0	0	0		0	0	0	0
1452.5	0		0	0	0	0	0	0		0	0	0	0
1453.5	0		0	0	0	0	0	0		0	0	0	0
1454.5	0		0	0	0	0	0	0		0	0	0	0
1455.5	0		0	0	0	0	0	0		0	0	0	0
1456.5	0		0	0	0	0	0	0		0	0	0	0
1457.5	0		0	0	0	0	0	0		0	0	0	0
1458.5	0		0	0	0	0	0	0		0	0	0	0
1459.5	0		0	0	0	0	0	0		0	0	0	0
1460.5	0		0	0	0	0	0	0		0	0	0	0
1461.5	0		0	0	0	0	0	0		0	0	0	0
1462.5	0		0	0	0	0	0	0		0	0	0	0
1463.5	0		0	0	0	0	0	0		0	0	0	0
1464.5	0		0	0	0	0	0	0		0	0	0	0
1465.5	0		0	0	0	0	0	0		0	0	0	0
1466.5	0		0	0	0	0	0	0		0	0	0	0
1467.5	0		0	0	0	0	0	0		0	0	0	0
1468.5	0		0	0	0	0	0	0		0	0	0	0
1469.5	0		0	0	0	0	0	0		0	0	0	0
1470.5	0		0	0	0	0	0	0		0	0	0	0
1471.5	0		0	0	0	0	0	0		0	0	0	0
1472.5	0		0	0	0	0	0	0		0	0	0	0
1473.5	0		0	0	0	0	0	0		0	0	0	0
1474.5	0		0	0	0	0	0	0		0	0	0	0
1475.5	0		0	0	0	0	0	0		0	0	0	0
1476.5	0		0	0	0	0	0	0		0	0	0	0
1477.5	0		0	0	0	0	0	0		0	0	0	0
1478.5	0		0	0	0	0	0	0		0	0	0	0
1479.5	0		0	0	0	0	0	0		0	0	0	0
1480.5	0		0	0	0	0	0	0		0	0	0	0
1481.5	0		0	0	0	0	0	0		0	0	0	0
1482.5	0		0	0	0	0	0	0		0	0	0	0
1483.5	0		0	0	0	0	0	0		0	0	0	0
1484.5	0		0	0	0	0	0	0		0	0	0	0
1485.5	0		0	0	0	0	0	0		0	0	0	0
1486.5	0		0	0	0	0	0	0		0	0	0	0
1487.5	0		0	0	0	0	0	0		0	0	0	0
1488.5	0		0	0	0	0	0	0		0	0	0	0
1489.5	0		0	0	0	0	0	0		0	0	0	0
1490.5	0		0	0	0	0	0	0		0	0	0	0
1491.5	0		0	0	0	0	0	0		0	0	0	0
1492.5	0		0	0	0	0	0	0		0	0	0	0
1493.5	0		0	0	0	0	0	0		0	0	0	0
1494.5	0		0	0	0	0	0	0		0	0	0	0
1495.5	0		0	0	0	0	0	0		0	0	0	0
1496.5	0		0	0	0	0	0	0		0	0	0	0
1497.5	0		0	0	0	0	0	0		0	0	0	0
1498.5	0		0	0	0	0	0	0		0	0	0	0
1499.5	0		0	0	0	0	0	0		0	0	0	0
1500.5	0		0	0	0	0	0	0		0	0	0	0
1501.5	0		0	0	0	0	0	0		0	0	0	0
1502.5	0		0	0	0	0	0	0		0	0	0	0
1503.5	0		0	0	0	0	0	0		0	0	0	0
1504.5	0		0	0	0	0	0	0		0	0	0	0
1505.5	0		0	0	0	0	0	0		0	0	0	0
1506.5	0		0	0	0	0	0	0		0	0	0	0
1507.5	0		0	0	0	0	0	0		0	0	0	0
1508.5	0		0	0	0	0	0	0		0	0	0	0
1509.5	0		0	0	0	0	0	0		0	0	0	0
1510.5	0		0	0	0	0	0	0		0	0	0	0
1511.5	0		0	0	0	0	0	0		0	0	0	0
1512.5	0		0	0	0	0	0	0		0	0	0	0
1513.5	0		0	0	0	0	0	0		0	0	0	0
1514.5	0		0	0	0	0	0	0		0	0	0	0
1515.5	0		0	0	0	0	0	0		0	0	0	0
1516.5	0		0	0	0	0	0	0		0	0	0	0
1517.5	0		0	0	0	0	0	0		0	0	0	0
1518.5	0		0	0	0	0	0	0		0	0	0	0
1519.5	0		0	0	0	0	0	0		0	0	0	0
1520.5	0		0	0	0	0	0	0		0	0	0	0
1521.5	0		0	0	0	0	0	0		0	0	0	0
1522.5	0		0	0	0	0	0	0		0	0	0	0
1523.5	0		0	0	0	0	0	0		0	0	0	0
1524.5	0		0	0	0	0	0	0		0	0	0	0
1525.5	0		0	0	0	0	0	0		0	0	0	0
1526.5	0		0	0	0	0	0	0		0	0	0	0
1527.5	0		0	0	0	0	0	0		0	0	0	0
1528.5	0		0	0	0	0	0	0		0	0	0	0
1529.5	0		0	0	0	0	0	0		0	0	0	0
1530.5	0		0	0	0	0	0	0		0	0	0	0
1531.5	0		0	0	0	0	0	0		0	0	0	0
1532.5	0		0	0	0	0	0	0		0	0	0	0
1533.5	0		0	0	0	0	0	0		0	0	0	0
1534.5	0		0	0	0	0	0	0		0	0	0	0
1535.5	0		0	0	0	0	0	0		0	0	0	0
1536.5	0		0	0	0	0	0	0		0	0	0	0
1537.5	0		0	0	0	0	0	0		0	0	0	0
1538.5	0		0	0	0	0	0	0		0	0	0	0
1539.5	0		0	0	0	0	0	0		0	0	0	0
1540.5	0		0	0	0	0	0	0		0	0	0	0
1541.5	0		0	0	0	0	0	0		0	0	0	0
1542.5	0		0	0	0	0	0	0		0	0	0	0
1543.5	0		0	0	0	0	0	0		0	0	0	0
1544.5	0		0	0	0	0	0	0		0	0	0	0
1545.5	0		0	0	0	0	0	0		0	0	0	0
1546.5	0		0	0	0	0	0	0		0	0	0	0
1547.5	0		0	0	0	0	0	0		0	0	0	0
1548.5	0		0	0	0	0	0	0		0	0	0	0
1549.5	0		0	0	0	0	0	0		0	0	0	0
1550.5	0		0	0	0	0	0	0		0	0	0	0
1551.5	0		0	0	0	0	0	0		0	0	0	0
1552.5	0		0	0	0	0	0	0		0	0	0	0
1553.5	0		0	0	0	0	0	0		0	0	0	0
1554.5	0		0	0	0	0	0	0		0	0	0	0
1555.5	0		0	0	0	0	0	0		0	0	0	0
1556.5	0		0	0	0	0	0	0		0	0	0	0
1557.5	0		0	0	0	0	0	0		0	0	0	0
1558.5	0		0	0	0	0	0	0		0	0	0	0
1559.5	0		0	0	0	0	0	0		0	0	0	0
1560.5	0		0	0	0	0	0	0		0	0	0	0
1561.5	0		0	0	0	0	0	0		0	0	0	0
1562.5	0		0	0	0	0	0	0		0	0	0	0
1563.5	0		0	0	0	0	0	0		0	0	0	0
1564.5	0		0	0	0	0	0	0		0	0	0	0
1565.5	0		0	0	0	0	0	0		0	0	0	0
1566.5	0		0	0	0	0	0	0		0	0	0	0
1567.5	0		0	0	0	0	0	0		0	0	0	0
1568.5	0		0	0	0	0	0	0		0	0	0	0
1569.5	0		0	0	0	0	0	0		0	0	0	0
1570.5	0		0	0	0	0	0	0		0	0	0	0
1571.5	0		0	0	0	0	0	0		0	0	0	0
1572.5	0		0	0	0	0	0	0		0	0	0	0
1573.5	0		0	0	0	0	0	0		0	0	0	0
1574.5	0		0	0	0	0	0	0		0	0	0	0
1575.5	0		0	0	0	0	0	0		0	0	0	0
1576.5	0		0	0	0	0	0	0		0	0	0	0
1577.5	0		0	0	0	0	0	0		0	0	0	0
1578.5	0		0	0	0	0	0	0		0	0	0	0
1579.5	0		0	0	0	0	0	0		0	0	0	0
1580.5	0		0	0	0	0	0	0		0	0	0	0
1581.5	0		0	0	0	0	0	0		0	0	0	0
1582.5	0		0	0	0	0	0	0		0	0	0	0
1583.5	0		0	0	0	0	0	0		0	0	0	0
1584.5	0		0	0	0	0	0	0		0	0	0	0
1585.5	0		0	0	0	0	0	0		0	0	0	0
1586.5	0		0	0	0	0	0	0		0	0	0	0
1587.5	0		0	0	0	0	0	0		0	0	0	0
1588.5	0		0	0	0	0	0	0		0	0	0	0
1589.5	0		0	0	0	0	0	0		0	0	0	0
1590.5	0		0	0	0	0	0	0		0	0	0	0
1591.5	0		0	0	0	0	0	0		0	0	0	0
1592.5	0		0	0	0	0	0	0		0	0	0	0
1593.5	0		0	0	0	0	0	0		0	0	0	0
1594.5	0		0	0	0	0	0	0		0	0	0	0
1595.5	0		0	0	0	0	0	0		0	0	0	0
1596.5	0		0	0	0	0	0	0		0	0	0	0
1597.5	0		0	0	0	0	0	0		0	0	0	0
1598.5	0		0	0	0	0	0	0		0	0	0	0
1599.5	0		0	0	0	0	0	0		0	0	0	0
1600.5	0		0	0	0	0	0	0		0	0	0	0
1601.5	0		0	0	0	0	0	0		0	0	0	0
1602.5	0		0	0	0	0	0	0		0	0	0	0
1603.5	0		0	0	0	0	0	0		0	0	0	0
1604.5	0		0	0	0	0	0	0		0	0	0	0
1605.5	0		0	0	0	0	0	0		0	0	0	0
1606.5	0		0	0	0	0	0	0		0	0	0	0
1607.5	0		0	0	0	0	0	0		0	0	0	0
1608.5	0		0	0	0	0	0	0		0	0	0	0
1609.5	0		0	0	0	0	0	0		0	0	0	0
1610.5	0		0	0	0	0	0	0		0	0	0	0
1611.5	0		0	0	0	0	0	0		0	0	0	0
1612.5	0		0	0	0	0	0	0		0	0	0	0
1613.5	0		0	0	0	0	0	0		0	0	0	0
1614.5	0		0	0	0	0	0	0		0	0	0	0
1615.5	0		0	0	0	0	0	0		0	0	0	0
1616.5	0		0	0	0	0	0	0		0	0	0	0
1617.5	0		0	0	0	0	0	0		0	0	0	0
1618.5	0		0	0	0	0	0	0		0	0	0	0
1619.5	0		0	0	0	0	0	0		0	0	0	0
1620.5	0		0	0	0	0	0	0		0	0	0	0
1621.5	0		0	0	0	0	0	0		0	0	0	0
1622.5	0		0	0	0	0	0	0		0	0	0	0
1623.5	0		0	0	0	0	0	0		0	0	0	0
1624.5	0		0	0	0	0	0	0		0	0	0	0
1625.5	0		0	0	0	0	0	0		0	0	0	0
1626.5	0		0	0	0	0	0	0		0	0	0	0
1627.5	0		0	0	0	0	0	0		0	0	0	0
1628.5	0		0	0	0	0	0	0		0	0	0	0
1629.5	0		0	0	0	0	0	0		0	0	0	0
1630.5	0		0	0	0	0	0	0		0	0	0	0
1631.5	0		0	0	0	0	0	0		0	0	0	0
1632.5	0		0	0	0	0	0	0		0	0	0	0
1633.5	0		0	0	0	0	0	0		0	0	0	0
1634.5	0		0	0	0	0	0	0		0	0	0	0
1635.5	0		0	0	0	0	0	0		0	0	0	0
1636.5	0		0	0	0	0	0	0		0	0	0	0
1637.5	0		0	0	0	0	0	0		0	0	0	0
1638.5	0		0	0	0	0	0	0		0	0	0	0
1639.5	0		0	0	0	0	0	0		0	0	0	0
1640.5	0		0	0	0	0	0	0		0	0	0	0
1641.5	0		0	0	0	0	0	0		0	0	0	0
1642.5	0		0	0	0	0	0	0		0	0	0	0
1643.5	0		0	0	0	0	0	0		0	0	0	0
1644.5	0		0	0	0	0	0	0		0	0	0	0
1645.5	0		0	0	0	0	0	0		0	0	0	0
1646.5	0		0	0	0	0	0	0		0	0	0	0
1647.5	0		0	0	0	0	0	0		0	0	0	0
1648.5	0		0	0	0	0	0	0		0	0	0	0
1649.5	0		0	0	0	0	0	0		0	0	0	0
1650.5	0		0	0	0	0	0	0		0	0	0	0
1651.5	0		0	0	0	0	0	0		0	0	0	0
1652.5	0		0	0	0	0	0	0		0	0	0	0
1653.5	0		0	0	0	0	0	0		0	0	0	0
1654.5	0		0	0	0	0	0	0		0	0	0	0
1655.5	0		0	0	0	0	0	0		0	0	0	0
1656.5	0		0	0	0	0	0	0		0	0	0	0
1657.5	0		0	0	0	0	0	0		0	0	0	0
1658.5	0		0	0	0	0	0	0		0	0	0	0
1659.5	0		0	0	0	0	0	0		0	0	0	0
1660.5	0		0	0	0	0	0	0		0	0	0	0
1661.5	0		0	0	0	0	0	0		0	0	0	0
1662.5	0		0	0	0	0	0	0		0	0	0	0
1663.5	0		0	0	0	0	0	0		0	0	0	0
1664.5	0		0	0	0	0	0	0		0	0	0	0
1665.5	0		0	0	0	0	0	0		0	0	0	0
1666.5	0		0	0	0	0	0	0		0	0	0	0
1667.5	0		0	0	0	0	0	0		0	0	0	0
1668.5	0		0	0	0	0	0	0		0	0	0	0
1669.5	0		0	0	0	0	0	0		0	0	0	0
1670.5	0		0	0	0	0	0	0		0	0	0	0
1671.5	0		0	0	0	0	0	0		0	0	0	0
1672.5	0		0	0	0	0	0	0		0	0	0	0
1673.5	0		0	0	0	0	0	0		0	0	0	0
1674.5	0		0	0	0	0	0	0		0	0	0	0
1675.5	0		0	0	0	0	0	0		0	0	0	0
1676.5	0		0	0	0	0	0	0		0	0	0	0
1677.5	0		0	0	0	0	0	0		0	0	0	0
1678.5	0		0	0	0	0	0	0		0	0	0	0
1679.5	0		0	0	0	0	0	0		0	0	0	0
1680.5	0		0	0	0	0	0	0		0	0	0	0
1681.5	0		0	0	0	0	0	0		0	0	0	0
1682.5	0		0	0	0	0	0	0		0	0	0	0
1683.5	0		0	0	0	0	0	0		0	0	0	0
1684.5	0		0	0	0	0	0	0		0	0	0	0
1685.5	0		0	0	0	0	0	0		0	0	0	0
1686.5	0		0	0	0	0	0	0		0	0	0	0
1687.5	0		0	0	0	0	0	0		0	0	0	0
1688.5	0		0	0	0	0	0	0		0	0	0	0
1689.5	0		0	0	0	0	0	0		0	0	0	0
1690.5	0		0	0	0	0	0	0		0	0	0	0
1691.5	0		0	0	0	0	0	0		0	0	0	0
1692.5	0		0	0	0	0	0	0		0	0	0	0
1693.5	0		0	0	0	0	0	0		0	0	0	0
1694.5	0		0	0	0	0	0	0		0	0	0	0
1695.5	0		0	0	0	0	0	0		0	0	0	0
1696.5	0		0	0	0	0	0	0		0	0	0	0
1697.5	0		0	0	0	0	0	0		0	0	0	0
1698.5	0		0	0	0	0	0	0		0	0	0	0
1699.5	0		0	0	0	0	0	0		0	0	0	0
1700.5	0		0	0	0	0	0	0		0	0	0	0
1701.5	0		0	0	0	0	0	0		0	0	0	0
1702.5	0		0	0	0	0	0	0		0	0	0	0
1703.5	0		0	0	0	0	0	0		0	0	0	0
1704.5	0		0	0	0	0	0	0		0	0	0	0
1705.5	0		0	0	0	0	0	0		0	0	0	0
1706.5	0		0	0	0	0	0	0		0	0	0	0
1707.5	0		0	0	0	0	0	0		0	0	0	0
1708.5	0		0	0	0	0	0	0		0	0	0	0
1709.5	0		0	0	0	0	0	0		0	0	0	0
1710.5	0		0	0	0	0	0	0		0	0	0	0
1711.5	0		0	0	0	0	0	0		0	0	0	0
1712.5	0		0	0	0	0	0	0		0	0	0	0
1713.5	0		0	0	0	0	0	0		0	0	0	0
1714.5	0		0	0	0	0	0	0		0	0	0	0
1715.5	0		0	0	0	0	0	0		0	0	0	0
1716.5	0		0	0	0	0	0	0		0	0	0	0
1717.5	0		0	0	0	0	0	0		0	0	0	0
1718.5	0		0	0	0	0	0	0		0	0	0	0
1719.5	0		0	0	0	0	0	0		0	0	0	0
1720.5	0		0	0	0	0	0	0		0	0	0	0
1721.5	0		0	0	0	0	0	0		0	0	0	0
1722.5	0		0	0	0	0	0	0		0	0	0	0
1723.5	0		0	0	0	0	0	0		0	0	0	0
1724.5	0		0	0	0	0	0	0		0	0	0	0
1725.5	0		0	0	0	0	0	0		0	0	0	0
1726.5	0		0	0	0	0	0	0		0	0	0	0
1727.5	0		0	0	0	0	0	0		0	0	0	0
1728.5	0		0	0	0	0	0	0		0	0	0	0
1729.5	0		0	0	0	0	0	0		0	0	0	0
1730.5	0		0	0	0	0	0	0		0	0	0	0
1731.5	0		0	0	0	0	0	0		0	0	0	0
1732.5	0		0	0	0	0	0	0		0	0	0	0
1733.5	0		0	0	0	0	0	0		0	0	0	0
1734.5	0		0	0	0	0	0	0		0	0	0	0
1735.5	0		0	0	0	0	0	0		0	0	0	0
1736.5	0		0	0	0	0	0	0		0	0	0	0
1737.5	0		0	0	0	0	0	0		0	0	0	0
1738.5	0		0	0	0	0	0	0		0	0	0	0
1739.5	0		0	0	0	0	0	0		0	0	0	0
1740.5	0		0	0	0	0	0	0		0	0	0	0
1741.5	0		0	0	0	0	0	0		0	0	0	0
1742.5	0		0	0	0	0	0	0		0	0	0	0
1743.5	0		0	0	0	0	0	0		0	0	0	0
1744.5	0		0	0	0	0	0	0		0	0	0	0
1745.5	0		0	0	0	0	0	0		0	0	0	0
1746.5	0		0	0	0	0	0	0		0	0	0	0
1747.5	0		0	0	0	0	0	0		0	0	0	0
1748.5	0		0	0	0	0	0	0		0	0	0	0
1749.5	0		0	0	0	0	0	0		0	0	0	0
1750.5	0		0	0	0	0	0	0		0	0	0	0
1751.5	0		0	0	0	0	0	0		0	0	0	0
1752.5	0		0	0	0	0	0	0		0	0	0	0
1753.5	0		0	0	0	0	0	0		0	0	0	0
1754.5	0		0	0	0	0	0	0		0	0	0	0
1755.5	0		0	0	0	0	0	0		0	0	0	0
1756.5	0		0	0	0	0	0	0		0	0	0	0
1757.5	0		0	0	0	0	0	0		0	0	0	0
1758.5	0		0	0	0	0	0	0		0	0	0	0
1759.5	0		0	0	0	0	0	0		0	0	0	0
1760.5	0		0	0	0	0	0	0		0	0	0	0
1761.5	0		0	0	0	0	0	0		0	0	0	0
1762.5	0		0	0	0	0	0	0		0	0	0	0
1763.5	0		0	0	0	0	0	0		0	0	0	0
1764.5	0		0	0	0	0	0	0		0	0	0	0
1765.5	0		0	0	0	0	0	0		0	0	0	0
1766.5	0		0	0	0	0	0	0		0	0	0	0
1767.5	0		0	0	0	0	0	0		0	0	0	0
1768.5	0		0	0	0	0	0	0		0	0	0	0
1769.5	0		0	0	0	0	0	0		0	0	0	0
1770.5	0		0	0	0	0	0	0		0	0	0	0
1771.5	0		0	0	0	0	0	0		0	0	0	0
1772.5	0		0	0	0	0	0	0		0	0	0	0
1773.5	0		0	0	0	0	0	0		0	0	0	0
1774.5	0		0	0	0	0	0	0		0	0	0	0
1775.5	0		0	0	0	0	0	0		0	0	0	0
1776.5	0		0	0	0	0	0	0		0	0	0	0
1777.5	0		0	0	0	0	0	0		0	0	0	0
1778.5	0		0	0	0	0	0	0		0	0	0	0
1779.5	0		0	0	0	0	0	0		0	0	0	0
1780.5	0		0	0	0	0	0	0		0	0	0	0
1781.5	0		0	0	0	0	0	0		0	0	0	0
1782.5	0		0	0	0	0	0	0		0	0	0	0
1783.5	0		0	0	0	0	0	0		0	0	0	0
1784.5	0		0	0	0	0	0	0		0	0	0	0
1785.5	0		0	0	0	0	0	0		0	0	0	0
1786.5	0		0	0	0	0	0	0		0	0	0	0
1787.5	0		0	0	0	0	0	0		0	0	0	0
1788.5	0		0	0	0	0	0	0		0	0	0	0
1789.5	0		0	0	0	0	0	0		0	0	0	0
1790.5	0		0	0	0	0	0	0		0	0	0	0
1791.5	0		0	0	0	0	0	0		0	0	0	0
1792.5	0		0	0	0	0	0	0		0	0	0	0
1793.5	0		0	0	0	0	0	0		0	0	0	0
1794.5	0		0	0	0	0	0	0		0	0	0	0
1795.5	0		0	0	0	0	0	0		0	0	0	0
1796.5	0		0	0	0	0	0	0		0	0	0	0
1797.5	0		0	0	0	0	0	0		0	0	0	0
1798.5	0		0	0	0	0	0	0		0	0	0	0
1799.5	0		0	0	0	0	0	0		0	0	0	0
1800.5	0		0	0	0	0	0	0		0	0	0	0
