# Supplementary material for: Elevated pyramidal cell firing orchestrates arteriolar vasoconstriction through COX-2-derived prostaglandin E2 signaling
Source: eLife. 2025 Apr 23;13:RP102424. doi: 10.7554/eLife.102424 (PMC12017770; doi:10.7554/eLife.102424)
Supplement: Figure 2—source data 1. [file elife-102424-fig2-data1.xls]

## Sheet: 2 Hz
BG-145				BG-149				BG-151				BG-153				BG-154				BG-155				BG-156				BG-157				BG-161
Time (s)	F (cell)	F (background)	F (cell-background)	Time (s)	F (cell)	F (background)	F (cell-background)	Time (s)	F (cell)	F (background)	F (cell-background)	Time (s)	F (cell)	F (background)	F (cell-background)	Time (s)	F (cell)	F (background)	F (cell-background)	Time (s)	F (cell)	F (background)	F (cell-background)	Time (s)	F (cell)	F (background)	F (cell-background)	Time (s)	F (cell)	F (background)	F (cell-background)	Time (s)	F (cell)	F (background)	F (cell-background)
0.248	1963.38	1012.97	950.409	0.227	1184.89	718.815	466.072	0.247	756.684	513.35	243.334	0.247	1125.29	677.404	447.886	0.229	900.332	595.896	304.436	0.247	943.129	503.735	439.394	0.247	993.741	595.11	398.631	0.246	911.089	635.182	275.907	0.227	1094.95	600.683	494.271
1.519	1962.83	1011.05	951.779	1.516	1184.36	717.073	467.287	1.526	754.85	510.382	244.468	1.515	1122.13	676.037	446.096	1.524	898.874	593.541	305.333	1.527	943.269	502.499	440.77	1.522	993.344	592.52	400.824	1.52	909.33	633.735	275.595	1.519	1093.49	599.591	493.897
2.791	1966.16	1009.32	956.843	2.796	1180.77	716.465	464.301	2.803	755.566	509.931	245.635	2.788	1122.54	674.947	447.589	2.792	901.13	592.753	308.377	2.802	941.78	502.251	439.529	2.79	990.355	591.749	398.606	2.799	908.476	632.953	275.523	2.791	1094.39	598.965	495.421
4.058	1970.85	1007.89	962.952	4.071	1183.93	715.605	468.327	4.08	752.476	509.67	242.806	4.056	1122.1	674.301	447.797	4.064	901.369	592.226	309.143	4.078	942.909	502.03	440.879	4.065	989.378	591.173	398.205	4.077	904.57	632.013	272.557	4.058	1093.29	598.351	494.942
5.325	1969.71	1006.6	963.106	5.348	1186.23	714.683	471.549	5.355	752.546	509.535	243.011	5.326	1123.81	673.586	450.226	5.333	895.981	591.457	304.524	5.351	942.409	501.861	440.548	5.338	989.91	590.919	398.991	5.354	905.333	631.447	273.886	5.325	1091.81	598.061	493.752
6.589	1964.85	1004.82	960.027	6.624	1185.29	713.93	471.361	6.629	753.839	509.203	244.636	6.595	1120.34	672.72	447.623	6.603	898.635	590.956	307.679	6.627	942.278	501.548	440.73	6.608	989.743	590.227	399.516	6.629	905.603	630.753	274.85	6.606	1091.27	597.298	493.967
7.862	1969.81	1003.64	966.171	7.895	1183.67	712.914	470.756	7.904	753.764	508.896	244.868	7.875	1123.51	671.941	451.564	7.874	903.417	590.389	313.028	7.898	941.574	501.332	440.242	7.885	989.905	589.754	400.151	7.904	904.687	630.019	274.668	7.882	1092.52	596.715	495.804
9.136	1967.88	1002.4	965.476	9.17	1181.97	712.005	469.964	9.172	753.365	508.797	244.568	9.152	1122.49	671.34	451.146	9.151	907.581	589.788	317.793	9.166	941.455	501.244	440.211	9.163	988.609	589.461	399.148	9.174	905.544	629.371	276.173	9.162	1094.91	596.328	498.58
10.412	1966.76	1000.57	966.192	10.438	1183.9	711.013	472.883	10.442	752.303	508.545	243.758	10.428	1123.78	670.343	453.435	10.427	915.547	589.178	326.369	10.437	942.73	501.038	441.692	10.44	991.49	588.806	402.684	10.449	908.281	628.252	280.029	10.437	1093.16	595.856	497.309
11.685	1969.83	999.198	970.631	11.71	1186.62	710.204	476.414	11.712	751.851	508.404	243.447	11.705	1129.97	669.657	460.31	11.703	921.097	588.484	332.613	11.708	943.78	500.952	442.828	11.716	990.476	588.415	402.061	11.721	906.116	627.733	278.383	11.711	1093.3	595.344	497.953
12.959	1969.08	997.797	971.282	12.98	1185.29	709.401	475.89	12.984	753.592	508.2	245.392	12.981	1132.8	669.123	463.677	12.981	922.78	587.787	334.993	12.984	942.234	500.598	441.636	12.993	990.706	587.974	402.732	12.989	906.451	626.976	279.475	12.987	1091.14	594.925	496.219
14.232	1968.55	996.566	971.981	14.245	1185.64	708.385	477.257	14.261	752.65	508.073	244.577	14.255	1131.14	668.41	462.734	14.254	923.98	587.271	336.709	14.265	942.536	500.326	442.21	14.264	989.69	587.536	402.154	14.258	902.638	626.383	276.255	14.257	1089.34	594.447	494.892
15.502	1966.5	994.846	971.65	15.521	1183.5	707.197	476.303	15.54	752.177	507.86	244.317	15.525	1127.35	667.51	459.841	15.531	927.599	586.576	341.023	15.545	943.359	500.336	443.023	15.539	989.2	587.095	402.105	15.539	901.012	625.587	275.425	15.528	1089.45	593.901	495.546
16.767	1964.83	993.602	971.227	16.796	1184.16	706.346	477.819	16.81	752.251	507.524	244.727	16.796	1128.59	666.787	461.8	16.805	925.597	585.852	339.745	16.821	942.126	500.015	442.111	16.814	988.985	586.586	402.399	16.816	901.509	624.874	276.635	16.798	1089.13	593.536	495.594
18.033	1963.37	992.706	970.662	18.071	1183.98	705.397	478.588	18.085	752.472	507.237	245.235	18.064	1125.13	666.062	459.066	18.075	928.278	584.944	343.334	18.096	943.291	499.783	443.508	18.08	988.845	586.277	402.568	18.091	902.567	624.064	278.503	18.067	1089.81	592.721	497.092
19.3	1965.51	988.803	976.702	19.343	1184.73	704.334	480.401	19.359	751.246	507.222	244.024	19.33	1122.89	665.529	457.365	19.343	926.33	584.371	341.959	19.371	941.811	499.399	442.412	19.349	989.453	585.795	403.658	19.368	901.905	623.53	278.375	19.342	1091.01	592.532	498.477
20.575	1962.21	986.21	976.005	20.616	1183.7	703.347	480.353	20.631	752.4	506.981	245.419	20.607	1121.66	664.688	456.973	20.614	925.853	583.71	342.143	20.641	943.457	499.428	444.029	20.624	987.836	585.384	402.452	20.64	902.544	622.647	279.897	20.621	1089.91	591.979	497.936
21.853	1957.33	984.212	973.12	21.884	1182.47	702.328	480.143	21.906	752.04	506.671	245.369	21.885	1122.36	663.766	458.594	21.893	924.83	583.262	341.568	21.912	941.483	499.413	442.07	21.901	989.007	584.959	404.048	21.916	905.034	622.076	282.958	21.895	1088.61	591.449	497.165
23.127	1956.91	982.774	974.14	23.155	1181.2	701.405	479.8	23.177	751.733	506.58	245.153	23.16	1125.64	663.172	462.465	23.172	923.744	582.38	341.364	23.184	941.964	498.975	442.989	23.179	989.028	584.494	404.534	23.189	903.332	621.269	282.063	23.172	1086.65	591.135	495.516
24.4	1957.67	981.343	976.331	24.421	1181	700.409	480.587	24.449	750.61	506.145	244.465	24.434	1124.68	662.429	462.251	24.452	925.43	581.68	343.75	24.452	941.408	498.948	442.46	24.457	987.305	583.909	403.396	24.458	903.081	620.644	282.437	24.443	1086.66	590.595	496.062
25.672	1957.14	980.405	976.732	25.69	1181.1	699.399	481.702	25.72	750.707	505.988	244.719	25.709	1127.15	662.013	465.133	25.728	924.395	580.943	343.452	25.729	941.469	498.741	442.728	25.73	989.43	583.815	405.615	25.727	903.044	619.802	283.242	25.719	1089.63	589.865	499.764
26.944	1954.45	978.824	975.625	26.958	1182.57	698.623	483.945	26.999	751.14	505.83	245.31	26.979	1127.11	661.17	465.935	27.003	925.659	580.163	345.496	27.009	942.113	498.254	443.859	27.004	987.458	583.281	404.177	26.997	903.064	619.243	283.821	26.994	1090.48	589.459	501.026
28.211	1953.09	977.746	975.34	28.229	1181.29	697.981	483.305	28.276	749.111	505.753	243.358	28.253	1125.87	660.292	465.582	28.278	926.21	579.582	346.628	28.285	942.258	498.21	444.048	28.279	985.178	582.76	402.418	28.272	900.988	618.577	282.411	28.262	1090.92	589.138	501.785
29.479	1954.34	976.601	977.739	29.506	1182.64	696.901	485.744	29.555	749.786	505.223	244.563	29.523	1127.61	659.482	468.127	29.548	923.904	578.819	345.085	29.56	940.308	497.962	442.346	29.55	986.081	582.436	403.645	29.548	900.36	617.977	282.383	29.529	1089.9	588.659	501.243
30.746	2259.44	974.398	1285.05	30.782	1354.99	695.588	659.402	30.828				30.794	1181.56	657.737	523.827	30.819	1073.9	578.252	495.647	30.838	1036.51	499.879	536.635	30.82	1114.15	582.991	531.155	30.826			0	30.797	1163.95	590.363	573.584
32.01	2337.2	972.378	1364.83	32.057	1508.77	694.754	814.015	32.106	832.998	505.64	327.358	32.063	1234.98	656.689	578.293	32.087	1153.35	577.459	575.889	32.107	1068.55	499.178	569.374	32.09	1146.94	581.234	565.708	32.099	986.455	615.968	370.487	32.07	1201.76	588.982	612.779
33.278	2293.19	970.886	1322.3	33.331	1455.52	693.493	762.028	33.377	837.631	506.306	331.325	33.344				33.355	1138.55	576.247	562.298	33.383	1071.14	498.025	573.12	33.364	1139.51	581.033	558.472	33.373			0	33.347	1212.7	587.514	625.191
34.552	2279.42	969.917	1309.51	34.602	1446.78	693.138	753.644	34.651	830.866	504.557	326.309	34.623	1255.8	654.934	600.868	34.632	1134.06	575.831	558.229	34.655	1083.15	498.181	584.972	34.641	1118.22	579.953	538.264	34.648	971.3	614.367	356.933	34.624	1230.46	587.432	643.029
35.826				35.874				35.922	834.423	505.233	329.19	35.903				35.913				35.926				35.921	1121.85	580.036	541.81	35.919	978.245	614.182	364.063	35.9
37.101	2235.26	967.478	1267.78	37.144	1424.83	691.552	733.282	37.19	829.271	503.858	325.413	37.178	1246.42	652.908	593.516	37.189	1116.61	574.604	542.004	37.197	1101.71	497.338	604.368	37.196				37.19	967.588	613.185	354.403	37.176	1257.55	586.112	671.441
38.371				38.413				38.459	832.51	504.54	327.97	38.452	1265.01	670.87	594.144	38.465				38.47				38.47	1116.18	578.953	537.224	38.462	975.292	612.722	362.57	38.448
39.643	2224.32	964.681	1259.64	39.681	1412.51	689.451	723.056	39.737	829.598	503.52	326.078	39.727	1237.32	651.654	585.667	39.742	1105.06	572.703	532.352	39.748	1117.92	496.424	621.501	39.745				39.729	966.86	611.858	355.002	39.723	1281.14	584.391	696.751
40.91	2183.82	961.734	1222.09	40.95	1380.35	688.614	691.74	41.014	821.962	503.101	318.861	40.999	1224.07	650.885	573.182	41.01	1085.73	572.189	513.537	41.023	1114.3	496.32	617.978	41.016	1080.85	577.496	503.352	41.004	953.625	611.208	342.417	40.997	1277.56	583.993	693.568
42.18	2148.64	959.238	1189.4	42.23	1336.82	687.787	649.031	42.29	812.278	503.051	309.227	42.268	1207	650.349	556.647	42.284	1063.19	571.544	491.648	42.302	1105.78	495.965	609.812	42.29	1058.97	577.375	481.597	42.284	939.243	610.553	328.69	42.266	1260.18	583.458	676.72
43.447	2123.54	958.12	1165.42	43.505	1309.8	687.024	622.772	43.565	805.807	502.709	303.098	43.536	1195.22	649.866	545.359	43.552	1042.32	570.99	471.332	43.576	1098.33	495.849	602.479	43.559	1042.65	576.972	465.681	43.562	927.119	610.28	316.839	43.537	1251.18	582.824	668.357
44.717	2102.51	957.205	1145.3	44.782	1290.47	686.182	604.289	44.834	798.926	502.475	296.451	44.805	1181.16	649.18	531.978	44.822	1025.87	570.528	455.338	44.852	1093.71	495.457	598.253	44.828	1032.01	576.738	455.268	44.838	918.992	609.522	309.47	44.811	1239.58	582.721	656.862
45.984	2099.58	955.953	1143.62	46.054	1270.61	684.877	585.733	46.11	795.039	502.421	292.618	46.073	1174.31	648.42	525.885	46.091	1015.44	569.935	445.503	46.125	1087.66	495.402	592.259	46.098	1022.69	576.231	446.46	46.113	915.281	609.052	306.229	46.086	1228.89	582.154	646.734
47.258	2089.42	954.834	1134.58	47.329	1253.67	684.077	569.595	47.383	792.575	502.226	290.349	47.351	1167.43	647.76	519.673	47.367	1003.36	569.51	433.852	47.395	1085.89	495.349	590.546	47.378	1016.86	575.908	440.951	47.379	909.94	608.565	301.375	47.362	1221.98	581.635	640.346
48.534	2096.28	953.774	1142.51	48.603	1248.42	683.08	565.337	48.652	786.275	501.622	284.653	48.626	1161.92	647.459	514.465	48.642	996.346	568.915	427.431	48.666	1078.21	495.115	583.097	48.655	1015.47	575.604	439.87	48.654	908.011	607.71	300.301	48.637	1211.44	581.244	630.2
49.811	2105.63	952.698	1152.93	49.872	1238.64	682.21	556.427	49.924	783.974	501.59	282.384	49.905	1159.12	646.979	512.145	49.918	987.81	568.325	419.485	49.935	1073.39	494.717	578.674	49.931	1009.48	575.253	434.225	49.926	905.512	607.201	298.311	49.909	1203.72	580.901	622.816
51.08	2111.21	951.74	1159.47	51.14	1232.22	681.856	550.361	51.193	780.785	501.362	279.423	51.18	1156.06	646.12	509.935	51.193	984.239	567.796	416.443	51.204	1071	494.522	576.478	51.206	1004.95	574.803	430.151	51.196	903.994	606.573	297.421	51.185	1198.24	580.399	617.846
52.352	2116.36	950.846	1165.51	52.41	1227.99	680.977	547.011	52.468	780.057	501.428	278.629	52.455	1148.95	645.732	503.222	52.464	978.145	567.064	411.081	52.479	1066.54	494.488	572.051	52.474	1005.94	574.451	431.493	52.465	902.761	605.796	296.965	52.457	1191.29	580.343	610.95
53.257	2120.2	950.356	1169.84	53.315	1227.4	680.582	546.814	53.379	777.607	501.254	276.353	53.367	1150.18	645.27	504.912	53.375	975.848	566.698	409.15	53.393	1061.94	494.332	567.604	53.384	1004.2	574.17	430.028	53.371	901.51	605.652	295.858	53.369	1189.38	579.737	609.64
59.279	2123.03	945.984	1177.04	59.338	1214.26	678.42	535.841	59.402	769.72	501.642	268.078	59.391	1138.37	643.521	494.849	59.399	959.122	565.215	393.907	59.417	1047.63	494.766	552.869	59.407	1000.87	573.536	427.338	59.394	903.755	603.702	300.053	59.392	1162.56	578.641	583.918
65.301	2146.65	940.969	1205.68	65.361	1210.65	675.42	535.233	65.426	763.169	500.34	262.829	65.414	1127.75	640.869	486.885	65.423	946.39	563.063	383.327	65.441	1032.2	493.843	538.356	65.432	995.813	571.776	424.037	65.417	901.244	601.214	300.03	65.415	1143.8	576.858	566.942
71.323	2128.38	933.014	1195.37	71.384	1211.88	672.452	539.426	71.449	758.761	499.706	259.055	71.436	1125.24	638.375	486.867	71.446	939.545	560.73	378.815	71.465	1016.51	493.196	523.311	71.455	991.189	569.948	421.241	71.44	894.026	598.651	295.375	71.44	1128.19	575.051	553.138
77.346	2130.72	928.091	1202.63	77.407	1235.38	670.264	565.12	77.471	755.064	498.915	256.149	77.46	1124.6	635.811	488.793	77.47	929.936	558.451	371.485	77.487	1003.73	492.442	511.286	77.478	984.608	568.342	416.266	77.464	887.266	595.987	291.279	77.463	1120.66	573.413	547.244
83.368	2093.05	924.005	1169.04	83.431	1227.31	666.858	560.451	83.495	752.132	497.936	254.196	83.483	1125.07	633.259	491.813	83.492	924.492	556.466	368.026	83.51	991.412	491.663	499.749	83.5	980.554	567.119	413.435	83.486	884.928	593.304	291.624	83.486	1122.09	571.76	550.325
89.39	2103.44	919.58	1183.86	89.454	1199.6	663.107	536.488	89.518	750.295	496.993	253.302	89.506	1123.42	630.621	492.798	89.515	920.937	554.394	366.543	89.534	979.691	490.907	488.784	89.522	979.377	565.294	414.083	89.51	882.317	590.983	291.334	89.511	1119.13	569.721	549.413
95.413	2038.8	914.965	1123.84	95.478	1184.07	659.339	524.726	95.54	747.405	496.44	250.965	95.529	1124.39	628.11	496.284	95.538	912.473	552.158	360.315	95.558	970.447	490.155	480.292	95.546	974.939	563.81	411.129	95.535	879.418	588.729	290.689	95.534	1123.81	568.06	555.745
101.437	2027.7	910.361	1117.34	101.5	1178.89	655.838	523.048	101.564	745.676	495.839	249.837	101.553	1127.63	625.69	501.94	101.561	910.389	550.249	360.14	101.581	964.996	489.419	475.577	101.568	970.121	562.178	407.943	101.558	879.355	586.328	293.027	101.557	1123.26	566.443	556.82
107.458	2025.26	905.395	1119.87	107.525	1173.67	653.18	520.495	107.587	744.8	494.941	249.859	107.576	1120	623.185	496.811	107.585	914.003	548.201	365.802	107.606	957.728	488.762	468.966	107.59	969.366	560.735	408.631	107.581	876.932	584.034	292.898	107.579	1152.8	565.072	587.724
113.481	2010.52	900.812	1109.71	113.548	1171.35	650.503	520.849	113.608	741.664	494.147	247.517	113.6	1115.74	621.102	494.634	113.609	916.758	546.409	370.349	113.629	954.405	488.168	466.237	113.614	964.567	559.328	405.239	113.604	874.232	581.66	292.572	113.603	1178.44	563.506	614.936
119.503	2010.8	896.18	1114.62	119.569	1169.53	647.577	521.955	119.633	740.93	493.315	247.615	119.623	1118.67	618.757	499.911	119.633	917.154	544.442	372.712	119.653	952.272	487.367	464.905	119.637	962.315	557.752	404.563	119.627	872.966	579.448	293.518	119.626	1170.31	562.075	608.233
125.527	1984.07	888.523	1095.54	125.592	1167.4	644.861	522.542	125.656	741.977	492.805	249.172	125.647	1118.97	616.459	502.509	125.656	904.618	542.425	362.193	125.675	952.364	486.909	465.455	125.661	960.081	556.166	403.915	125.65	871.776	577.385	294.391	125.648	1158.84	560.429	598.414
131.548	1973.11	884.181	1088.93	131.615	1164.67	642.251	522.421	131.679	741.02	491.975	249.045	131.67	1120.59	614.296	506.295	131.68	897.298	540.801	356.497	131.699	948.142	486.152	461.99	131.685	961.452	555.122	406.33	131.674	865.171	575.501	289.67	131.67	1153.7	558.891	594.808
137.57	1968.05	880.168	1087.88	137.638	1164.45	639.319	525.135	137.704	741.037	491.445	249.592	137.694	1118.51	611.936	506.578	137.702	893.422	538.869	354.553	137.722	945.372	485.516	459.856	137.708	959.175	553.565	405.61	137.695	862.617	573.241	289.376	137.695	1149.93	557.523	592.409
143.593	1966.1	874.383	1091.72	143.662	1165.54	636.682	528.859	143.727	739.044	490.822	248.222	143.718	1115.03	610.19	504.838	143.725	894.094	537.419	356.675	143.744	946.965	485.036	461.929	143.731	961.151	552.083	409.068	143.718	861.744	571.341	290.403	143.719	1144.23	555.954	588.273
149.614	1961.16	870.681	1090.48	149.685	1162.52	633.911	528.608	149.75	737.336	489.834	247.502	149.741	1115.42	608.158	507.267	149.747	895.808	535.709	360.099	149.766	945.969	484.374	461.595	149.754	957.459	550.834	406.625	149.741	858.751	569.441	289.31	149.743	1158.7	554.902	603.797
155.636	1945.39	867.294	1078.09	155.708	1161.02	631.857	529.165	155.772	736.858	489.295	247.563	155.763	1115.33	606.071	509.26	155.769	896.826	534.328	362.498	155.789	946.975	483.83	463.145	155.777	955.448	549.482	405.966	155.763	853.876	567.289	286.587	155.766	1159.02	553.398	605.622
161.658	1939.92	864.007	1075.91	161.73	1160.46	629.322	531.138	161.794	735.265	488.594	246.671	161.785	1118.15	604.333	513.817	161.793	894.898	532.524	362.374	161.811	946.188	483.23	462.958	161.8	954.924	548.283	406.641	161.787	851.703	565.666	286.037	161.788	1151.86	552.093	599.765
167.679	1989.09	860.57	1128.52	167.752	1162.53	626.627	535.9	167.817	734.369	488.133	246.236	167.808	1127.23	602.2	525.032	167.814	894.227	531.116	363.111	167.833	945.337	482.436	462.901	167.823	955.77	546.929	408.841	167.811	848.574	563.692	284.882	167.812	1147.37	550.84	596.525
173.701	2017.16	856.677	1160.49	173.777	1157.33	624.558	532.767	173.841	733.997	487.735	246.262	173.831	1157.49	600.504	556.983	173.837	893.43	529.613	363.817	173.857	945.384	481.714	463.67	173.845	953.676	545.71	407.966	173.834	849.307	561.843	287.464	173.835	1136.44	549.704	586.737
179.724	1976.39	852.931	1123.45	179.8	1161.44	622.794	538.649	179.863	732.681	486.77	245.911	179.853	1174.33	598.292	576.042	179.862	887.544	527.968	359.576	179.88	945.352	481.342	464.01	179.869	954.783	544.645	410.138	179.859	845.516	560.157	285.359	179.859	1134.75	548.174	586.575
185.746	1946.69	849.242	1097.45	185.822	1164.48	620.938	543.539	185.887	732.699	486.332	246.367	185.877	1186.4	596.607	589.789	185.886	881.593	526.604	354.989	185.903	948.176	480.739	467.437	185.893	952.022	543.358	408.664	185.882	843.891	558.476	285.415	185.883	1128.4	547.039	581.358
191.77	1939.71	844.606	1095.1	191.847	1164.26	618.754	545.509	191.91	730.965	485.786	245.179	191.901	1189.69	594.71	594.981	191.91	873.984	525.525	348.459	191.926	947.314	480.258	467.056	191.916	952.997	542.487	410.51	191.905	841.773	556.963	284.81	191.906	1124.77	545.819	578.95
197.792	1949.25	839.831	1109.42	197.869	1162.43	616.897	545.534	197.933	730.627	485.252	245.375	197.922	1189.52	593.006	596.513	197.933	871.462	523.794	347.668	197.95	948.531	479.591	468.94	197.94	950.893	541.23	409.663	197.93	842.078	555.338	286.74	197.93	1122.89	544.741	578.15
203.814	1939.25	836.349	1102.9	203.89	1164.76	614.969	549.795	203.958	729.796	484.548	245.248	203.946	1187.37	591.448	595.92	203.957	876.974	522.47	354.504	203.974	948.67	479.089	469.581	203.964	952.693	540.136	412.557	203.953	835.708	553.579	282.129	203.953	1121.95	543.423	578.528
209.838	1919.81	833.107	1086.7	209.914	1163.23	613.027	550.201	209.981	729.174	484.053	245.121	209.97	1189.23	589.618	599.615	209.979	873.329	521.126	352.203	209.998	950.902	478.515	472.387	209.988	949.94	539.146	410.794	209.975	834.984	552.535	282.449	209.977	1121.03	542.405	578.621
215.861	1919.47	829.738	1089.73	215.937	1161.74	610.489	551.253	216.004	728.745	483.306	245.439	215.995	1194.07	588	606.068	216.003	875.593	519.893	355.7	216.021	952.003	478.108	473.895	216.012	950.465	538	412.465	215.999	832.808	550.582	282.226	216.001	1116.96	541.464	575.496
221.883	1909.13	826.569	1082.56	221.96	1161.78	608.215	553.569	222.029	727.674	483.06	244.614	222.017	1194.06	586.532	607.524	222.026	877.1	518.672	358.428	222.045	949.94	477.616	472.324	222.036	949.829	536.887	412.942	222.021	831.902	548.921	282.981	222.024	1115.77	540.196	575.571
227.905	1912.87	823.246	1089.63	227.984	1159.93	605.96	553.97	228.052	728.033	482.376	245.657	228.039	1199.59	584.858	614.727	228.049	878.961	517.37	361.591	228.067	952.037	477.121	474.916	228.059	951.771	536.11	415.661	228.044	829.755	547.448	282.307	228.048	1110.25	539.227	571.023
233.928	1902.8	820.061	1082.74	234.006	1160.97	603.728	557.246	234.075	726.491	481.88	244.611	234.062	1202.09	583.527	618.567	234.072	878.244	516.226	362.018	234.09	953.307	476.755	476.552	234.082	957.345	534.922	422.423	234.067	829.209	546.078	283.131	234.071	1105.55	538.024	567.522
239.949	1885.2	816.617	1068.58	240.029	1159.38	601.914	557.461	240.099	724.328	481.134	243.194	240.083	1195.98	581.885	614.094	240.094	874.026	515.172	358.854	240.115	951.243	476.327	474.916	240.105	962.97	534.151	428.819	240.09	827.722	544.846	282.876	240.093	1105.49	537.147	568.34
245.973	1870.25	813.88	1056.37	246.052	1158.46	600.067	558.392	246.121	725.115	480.967	244.148	246.106	1193.88	580.347	613.528	246.118	875.831	514.057	361.774	246.138	954.136	476.12	478.016	246.128	965.046	533.15	431.896	246.114	833.027	543.371	289.656	246.114	1101.41	536.148	565.262
251.994	1873.76	810.619	1063.14	252.076	1156.84	598.468	558.368	252.144	724.307	480.093	244.214	252.129	1195.76	578.985	616.779	252.141	876.356	512.788	363.568	252.162	954.924	475.436	479.488	252.152	972.273	532.113	440.16	252.137	828.603	542	286.603	252.137	1097.82	534.966	562.856
258.016	1861.51	807.709	1053.8	258.099	1162.04	596.824	565.214	258.166	723.214	479.771	243.443	258.152	1199.92	577.323	622.595	258.165	878.249	511.952	366.297	258.185	954.504	474.986	479.518	258.175	974.395	531.292	443.103	258.159	828.276	540.468	287.808	258.162	1091.62	534.289	557.329
264.039	1846.63	802.903	1043.73	264.122	1161.41	594.926	566.488	264.19	721.74	479.083	242.657	264.175	1206.07	575.899	630.17	264.188	878.829	511.024	367.805	264.208	956.074	474.686	481.388	264.198	978.745	530.257	448.488	264.183	829.326	539.51	289.816	264.184	1085.76	533.296	552.465
270.061	1825.72	799.727	1026	270.145	1162.28	593.526	568.753	270.213	722.279	478.661	243.618	270.2	1215.29	574.435	640.854	270.211	881.376	509.876	371.5	270.231	954.382	474.166	480.216	270.223	978.772	529.474	449.298	270.204	833.294	538.186	295.108	270.207	1083.85	532.431	551.417
276.083	1818.35	797.401	1020.95	276.168	1165.37	592.184	573.186	276.238	721.546	478.214	243.332	276.224	1221.5	573.118	648.386	276.234	880.013	508.643	371.37	276.255	957.674	473.61	484.064	276.245	979.169	528.448	450.721	276.227	831.604	536.854	294.75	276.231	1076.85	531.467	545.382
282.106	1816.05	795.035	1021.01	282.191	1167.97	590.537	577.43	282.26	720.604	477.713	242.891	282.247	1227.71	571.836	655.876	282.258	883.242	507.885	375.357	282.277	958.563	473.166	485.397	282.271	980.117	527.441	452.676	282.25	829.819	535.764	294.055	282.254	1074.18	530.55	543.632
288.127	1789.02	792.54	996.483	288.214	1165.58	589.288	576.288	288.284	720.884	477.316	243.568	288.271	1225.23	570.615	654.611	288.28	883.248	506.77	376.478	288.3	957.192	472.664	484.528	288.295	980.784	526.666	454.118	288.272	826.391	534.67	291.721	288.279	1083.84	529.649	554.193
294.149	1788.34	789.876	998.465	294.238	1165.51	588.151	577.356	294.308	721.539	476.661	244.878	294.295	1243.27	569.196	674.073	294.302	881.021	505.771	375.25	294.324	959.032	472.453	486.579	294.319	979.987	525.678	454.309	294.294	827.748	533.482	294.266	294.302	1076.57	528.917	547.657
300.172	1778.13	787.393	990.74	300.261	1170.26	586.704	583.555	300.331	719.861	476.371	243.49	300.32	1244.41	567.716	676.694	300.325	878.461	504.712	373.749	300.347	960.669	472.105	488.564	300.342	973.799	525.086	448.713	300.318	824.734	532.188	292.546	300.324	1070.81	528.058	542.748
306.194	1765.94	784.262	981.677	306.283	1167.17	585.459	581.714	306.354	720.309	476.03	244.279	306.344	1253.85	566.592	687.261	306.348	884.171	503.546	380.625	306.372	961.669	471.438	490.231	306.364	970.928	524.075	446.853	306.341	824.375	531.405	292.97	306.348	1067.72	527.46	540.264
312.218	1769.76	780.585	989.173	312.307	1172.65	584.345	588.31	312.377	719.19	475.656	243.534	312.368	1267.26	565.414	701.848	312.371	885.048	502.796	382.252	312.395	963.869	471.012	492.857	312.385	966.458	523.365	443.093	312.364	824.886	530.479	294.407	312.371	1067.4	526.276	541.127
318.239	1763	776.1	986.899	318.33	1175.36	582.865	592.499	318.4	719.169	475.012	244.157	318.391	1276.05	564.244	711.805	318.394	881.474	501.826	379.648	318.418	963.022	470.78	492.242	318.408	970.587	522.713	447.874	318.387	825.268	528.96	296.308	318.393	1065.21	525.498	539.716
324.261	1755.15	772.935	982.214	324.352	1176.94	581.399	595.538	324.423	718.093	474.835	243.258	324.412	1268.37	562.996	705.373	324.417	882.455	500.975	381.48	324.441	963.593	470.415	493.178	324.431	973.388	521.88	451.508	324.411	826.505	527.824	298.681	324.417	1061.17	524.42	536.748
330.285	1753.74	769.769	983.971	330.378	1177.68	580.17	597.509	330.446	718.504	474.359	244.145	330.435	1273.99	561.714	712.279	330.44	880.747	500.144	380.603	330.465	963.497	469.948	493.549	330.453	974.261	521.009	453.252	330.435	823.013	526.995	296.018	330.44	1062.16	523.871	538.288
336.307	1757.53	767.068	990.466	336.401	1176.9	578.988	597.909	336.469	718.12	473.803	244.317	336.46	1277.33	560.726	716.606	336.464	880.177	499.208	380.969	336.486	963.655	469.717	493.938	336.477	966.164	520.007	446.157	336.458	823.054	525.825	297.229	336.461	1058.4	523.292	535.108
342.329	1764.77	764.639	1000.13	342.424	1175.61	577.585	598.022	342.492	717.872	473.241	244.631	342.483	1272.19	559.355	712.833	342.486	882.187	498.24	383.947	342.511	965.313	469.354	495.959	342.499	965.749	519.479	446.27	342.482	825.586	524.799	300.787	342.486	1056.71	522.228	534.483
	BG-145				BG-149				BG-151				BG-153				BG-154				BG-155				BG-156				BG-157				BG-161
	F (cell)	F (background)	F (cell-background)		F (cell)	F (background)	F (cell-background)		F (cell)	F (background)	F (cell-background)		F (cell-background)	Time (s)	F (cell)		F (cell-background)	Time (s)	F (cell)		F (cell-background)	Time (s)	F (cell)		F (cell-background)	Time (s)	F (cell)		F (cell-background)	Time (s)	F (cell)		F (cell-background)	0	0
Pulse	10s;2hz;5ms	10s;2hz;5ms	10s;2hz;5ms	Pulse	10s;2hz;5ms	10s;2hz;5ms	10s;2hz;5ms	Pulse	10s;2hz;5ms	10s;2hz;5ms	10s;2hz;5ms	Pulse	10s;2hz;5ms	10s;2hz;5ms	10s;2hz;5ms	Pulse	10s;2hz;5ms	10s;2hz;5ms	10s;2hz;5ms	Pulse	10s;2hz;5ms	10s;2hz;5ms	10s;2hz;5ms	Pulse	10s;2hz;5ms	10s;2hz;5ms	10s;2hz;5ms	Pulse	10s;2hz;5ms	10s;2hz;5ms	10s;2hz;5ms	Pulse	10s;2hz;5ms	10s;2hz;5ms	10s;2hz;5ms
LED stim.	0.25	0.25	0.25	LED stim.	0.25	0.25	0.25	LED stim.	0.25	0.25	0.25	LED stim.	0.25	0.25	0.25	LED stim.	0.25	0.25	0.25	LED stim.	0.25	0.25	0.25	LED stim.	0.25	0.25	0.25	LED stim.	0.25	0.25	0.25	LED stim.	0.25	0.25	0.25
LED calcium	0.05	0.05	0.05	LED calcium	0.05	0.05	0.05	LED calcium	0.05	0.05	0.05	LED calcium	0.05	0.05	0.05	LED calcium	0.05	0.05	0.05	LED calcium	0.05	0.05	0.05	LED calcium	0.05	0.05	0.05	LED calcium	0.05	0.05	0.05	LED calcium	0.05	0.05	0.05
Layer	II/III	II/III	II/III	Layer	II/III	II/III	II/III	Layer	II/III	II/III	II/III	Layer	II/III	II/III	II/III	Layer	II/III	II/III	II/III	Layer	II/III	II/III	II/III	Layer	II/III	II/III	II/III	Layer	II/III	II/III	II/III	Layer	II/III	II/III	II/III
Min (ctrl)	1953.09	976.601	950.409	Min (ctrl)	1180.77	696.901	464.301	Min (ctrl)	749.111	505.223	242.806	Min (ctrl)	1120.34	659.482	446.096	Min (ctrl)	895.981	578.819	304.436	Min (ctrl)	940.308	497.962	439.394	Min (ctrl)	985.178	582.436	398.205	Min (ctrl)	900.36	617.977	272.557	Min (ctrl)	1086.65	588.659	493.752
Max (ctrl)	1970.85	1012.97	977.739	Max (ctrl)	1186.62	718.815	485.744	Max (ctrl)	756.684	513.35	245.635	Max (ctrl)	1132.8	677.404	468.127	Max (ctrl)	928.278	595.896	346.628	Max (ctrl)	943.78	503.735	444.048	Max (ctrl)	993.741	595.11	405.615	Max (ctrl)	911.089	635.182	283.821	Max (ctrl)	1094.95	600.683	501.785
Mean (ctrl)	1963.46	994.621	968.838	Mean (ctrl)	1183.54	707.673	475.865	Mean (ctrl)	752.465	508	244.465	Mean (ctrl)	1125.25	668.03	457.217	Mean (ctrl)	916.606	586.75	329.856	Mean (ctrl)	942.297	500.37	441.927	Mean (ctrl)	989.381	587.518	401.863	Mean (ctrl)	904.44	626.046	278.394	Mean (ctrl)	1091.07	594.231	496.842
sd (ctrl)	5.57429	11.5231	7.87611	sd (ctrl)	1.72077	6.6799	6.01278	sd (ctrl)	1.72265	1.83889	0.813393	sd (ctrl)	3.20204	5.27538	6.95259	sd (ctrl)	11.7418	4.82617	16.0166	sd (ctrl)	0.832469	1.51901	1.37718	sd (ctrl)	1.91268	3.38301	2.11323	sd (ctrl)	2.81621	5.15026	3.40249	sd (ctrl)	2.32934	3.54468	2.35865
1.960*sd	10.9256	22.5853	15.4372	1.960*sd	3.37271	13.0926	11.7851	1.960*sd	3.37639	3.60422	1.59425	1.960*sd	6.27601	10.3397	13.6271	1.960*sd	23.014	9.4593	31.3925	1.960*sd	1.63164	2.97725	2.69928	1.960*sd	3.74885	6.63069	4.14194	1.960*sd	5.51978	10.0945	6.66888	1.960*sd	4.56551	6.94757	4.62295
2.576*sd	14.3594	29.6835	20.2888	2.576*sd	4.43271	17.2074	15.4889	2.576*sd	4.43754	4.73697	2.0953	2.576*sd	8.24846	13.5894	17.9099	2.576*sd	30.247	12.4322	41.2587	2.576*sd	2.14444	3.91296	3.54763	2.576*sd	4.92707	8.71463	5.44369	2.576*sd	7.25457	13.2671	8.76481	2.576*sd	6.00038	9.13109	6.07587

## Sheet: 2 Hz (%)
Stimulation	BG-145	BG-149	BG-151	BG-153	BG-154	BG-155	BG-156	BG-157	BG-161
Time	F/F0	F/F0	F/F0	F/F0	F/F0	F/F0	F/F0	F/F0	F/F0	Mean	s,e,m,	sem+	sem-
0.248	-0.0190222	-0.0205786	-0.00462626	-0.0204089	-0.0770639	-0.00573209	-0.00804316	-0.00893264	-0.0051751	-0.0188425	0.00807276	-0.0107698	-0.0269153
1.519	-0.0176081	-0.0180253	1.24421e-05	-0.0243239	-0.0743446	-0.00261846	-0.00258608	-0.0100534	-0.00592785	-0.017275	0.00811792	-0.0091571	-0.0253929
2.791	-0.0123812	-0.0243002	0.00478613	-0.0210585	-0.0651163	-0.00542661	-0.00810537	-0.010312	-0.00286048	-0.0160861	0.00721447	-0.00887159	-0.0233005
4.058	-0.00607575	-0.0158399	-0.00678608	-0.0206035	-0.0627941	-0.00237181	-0.00910322	-0.020966	-0.00382457	-0.016485	0.00661245	-0.00987253	-0.0230974
5.325	-0.00591679	-0.00906902	-0.00594751	-0.015291	-0.0767971	-0.0031208	-0.00714733	-0.0161921	-0.0062197	-0.016189	0.00818456	-0.00800448	-0.0243736
6.589	-0.00909483	-0.00946409	0.000699657	-0.0209841	-0.0672324	-0.00270897	-0.00584092	-0.0127294	-0.00578696	-0.0147936	0.00728937	-0.00750418	-0.0220829
7.862	-0.00275321	-0.0107355	0.00164867	-0.0123646	-0.0510162	-0.00381322	-0.00426078	-0.0133832	-0.00208961	-0.0109742	0.00560881	-0.00536536	-0.016583
9.136	-0.00347056	-0.0123998	0.000421499	-0.0132788	-0.0365705	-0.00388337	-0.00675665	-0.00797716	0.00349767	-0.0089353	0.00414154	-0.00479375	-0.0130768
10.412	-0.00273154	-0.0062657	-0.00289186	-0.00827242	-0.0105713	-0.000532139	0.00204236	0.00587372	0.000939517	-0.00248993	0.00185113	-0.000638793	-0.00434106
11.685	0.00185024	0.00115448	-0.00416403	0.0067642	0.00835819	0.00203842	0.000492083	-3.8764e-05	0.0022357	0.00207672	0.00130079	0.00337751	0.000775937
12.959	0.00252218	5.3324e-05	0.00379212	0.0141283	0.0155735	-0.000658857	0.00216181	0.00388374	-0.00125434	0.00446686	0.0021833	0.00665016	0.00228356
14.232	0.00324366	0.00292599	0.000458314	0.0120658	0.0207757	0.00064	0.000723505	-0.00768261	-0.00392521	0.00324725	0.00300252	0.00624977	0.000244722
15.502	0.00290201	0.000921218	-0.000605233	0.00573843	0.0338542	0.00247967	0.000601573	-0.010664	-0.00260889	0.00362433	0.00432559	0.00794992	-0.000701264
16.767	0.00246541	0.004107	0.0010719	0.010023	0.0299797	0.000415981	0.00133316	-0.00631764	-0.00251228	0.00450737	0.00372632	0.00823369	0.000781051
18.033	0.00188224	0.005723	0.00314991	0.00404339	0.0408603	0.00357714	0.00175371	0.00039228	0.000502759	0.00687607	0.00454643	0.0114225	0.00232965
19.3	0.00811651	0.00953291	-0.00180377	0.000323059	0.0366918	0.00109709	0.00446607	-6.75003e-05	0.00329036	0.00684961	0.00417605	0.0110257	0.00267356
20.575	0.00739709	0.00943204	0.00390257	-0.000534301	0.0372496	0.00475606	0.00146505	0.00539958	0.00220149	0.0079188	0.00403332	0.0119521	0.00388548
21.853	0.0044193	0.00899074	0.00369804	0.00301106	0.0355064	0.000323206	0.00543655	0.0163948	0.000649686	0.00871442	0.00395129	0.0126657	0.00476313
23.127	0.0054721	0.00826995	0.00281448	0.0114775	0.034888	0.00240273	0.00664592	0.0131799	-0.00266927	0.00916459	0.00381205	0.0129766	0.00535254
24.4	0.00773357	0.00992378	1.7044e-07	0.0110094	0.0421214	0.0012057	0.00381411	0.0145233	-0.00157033	0.00986236	0.00468993	0.0145523	0.00517242
25.672	0.00814747	0.0122669	0.00103917	0.0173128	0.041218	0.00181214	0.00933589	0.0174149	0.00588072	0.0127142	0.00431211	0.0170263	0.00840211
26.944	0.00700487	0.0169804	0.0034567	0.0190669	0.0474146	0.00437138	0.00575756	0.0194947	0.00842077	0.0146631	0.00488812	0.0195512	0.00977498
28.211	0.0067107	0.0156355	-0.00452809	0.0182948	0.0508464	0.00479906	0.00138044	0.0144299	0.00994841	0.0130575	0.00562878	0.0186862	0.00742869
29.479	0.00918686	0.0207609	0.000401046	0.0238611	0.0461686	0.000947743	0.00443372	0.0143294	0.00885752	0.0143274	0.0051133	0.0194407	0.00921413
30.746	0.326377	0.385692		0.145685	0.502616	0.214306	0.321731		0.154459
32.01	0.408724	0.710602	0.339079	0.26481	0.74588	0.288389	0.407713	0.330802	0.233347
33.278	0.364831	0.601355	0.355307		0.704677	0.296865	0.389707		0.258329
34.552	0.351624	0.583736	0.334788	0.314185	0.692342	0.323684	0.339421	0.282116	0.294232
35.826			0.346573				0.348245	0.307727
37.101	0.308554	0.540947	0.331123	0.298105	0.643153	0.367574		0.273028	0.351417
38.371			0.341583	0.299478			0.336833	0.302364
39.643	0.300158	0.519457	0.333844	0.280938	0.613892	0.406343		0.275179	0.402359
40.91	0.261392	0.453649	0.304322	0.253632	0.556852	0.398371	0.252545	0.229974	0.395952	0.345188	0.0397064	0.384894	0.305481
42.18	0.227654	0.363898	0.264913	0.217467	0.490493	0.379893	0.19841	0.180666	0.362042	0.298382	0.0371687	0.33555	0.261213
43.447	0.202904	0.308717	0.239842	0.192779	0.428902	0.363299	0.158805	0.138097	0.34521	0.264284	0.0357844	0.300068	0.228499
44.717	0.182137	0.269876	0.212652	0.163512	0.380414	0.353737	0.132893	0.111627	0.322074	0.236547	0.0349266	0.271474	0.20162
45.984	0.180408	0.230882	0.196973	0.150186	0.350598	0.340173	0.110975	0.099985	0.301689	0.217986	0.0334277	0.251413	0.184558
47.258	0.171076	0.196969	0.187692	0.1366	0.315277	0.336297	0.0972663	0.0825493	0.288832	0.201395	0.0328598	0.234255	0.168535
48.534	0.179253	0.188021	0.164392	0.125209	0.295811	0.319441	0.0945763	0.0786914	0.268411	0.190423	0.0307627	0.221186	0.15966
49.811	0.190013	0.169297	0.15511	0.120135	0.271722	0.309433	0.0805293	0.0715433	0.253549	0.180148	0.0297517	0.2099	0.150396
51.08	0.19676	0.15655	0.142998	0.115301	0.262499	0.304464	0.0703915	0.0683464	0.243546	0.173428	0.0297944	0.203223	0.143634
52.352	0.202998	0.14951	0.13975	0.100619	0.246244	0.294446	0.0737309	0.0667084	0.229666	0.167075	0.0284927	0.195567	0.138582
53.257	0.207467	0.149096	0.13044	0.104315	0.24039	0.284384	0.0700854	0.062732	0.227029	0.163993	0.0279999	0.191993	0.135993
59.279	0.2149	0.126037	0.0965907	0.082306	0.194179	0.251041	0.0633916	0.0778006	0.175258	0.142389	0.0241133	0.166503	0.118276
65.301	0.24446	0.124759	0.0751193	0.0648875	0.162104	0.218201	0.0551774	0.077718	0.141091	0.12928	0.0242514	0.153531	0.105028
71.323	0.233814	0.13357	0.0596815	0.0648482	0.148425	0.184157	0.0482198	0.0609971	0.113307	0.116336	0.0228102	0.139146	0.0935253
77.346	0.241307	0.187565	0.0477943	0.0690606	0.126204	0.156946	0.0358399	0.0462841	0.101444	0.112494	0.0252632	0.137757	0.0872307
83.368	0.206641	0.177753	0.0398055	0.0756658	0.115717	0.13084	0.0287952	0.0475234	0.107645	0.103376	0.0218701	0.125246	0.0815062
89.39	0.221941	0.127396	0.0361485	0.0778201	0.111221	0.106028	0.0304077	0.0464817	0.10581	0.0959172	0.0208949	0.116812	0.0750222
95.413	0.159985	0.102679	0.0265888	0.0854445	0.0923403	0.0868126	0.023057	0.0441648	0.118554	0.0821807	0.0157933	0.097974	0.0663875
101.437	0.153282	0.0991529	0.0219747	0.097815	0.0918098	0.0761434	0.0151289	0.052563	0.120718	0.0809542	0.0159033	0.0968575	0.0650509
107.458	0.155886	0.093788	0.0220647	0.0865971	0.108975	0.0611839	0.0168409	0.0520996	0.182919	0.086706	0.0199599	0.106666	0.0667461
113.481	0.145404	0.0945319	0.0124846	0.0818357	0.12276	0.0550087	0.00840025	0.0509286	0.237689	0.0898935	0.0254521	0.115346	0.0644414
119.503	0.150466	0.0968561	0.0128855	0.0933773	0.129923	0.0519946	0.00671808	0.0543267	0.224198	0.0911939	0.0246552	0.115849	0.0665388
125.527	0.130779	0.0980896	0.0192545	0.0990595	0.0980337	0.0532392	0.00510559	0.0574625	0.204435	0.0850509	0.0214228	0.106474	0.0636281
131.548	0.123957	0.0978353	0.018735	0.10734	0.0807655	0.0453985	0.0111151	0.0405045	0.197177	0.0803142	0.0209104	0.101225	0.0594039
137.57	0.12287	0.103539	0.0209725	0.107959	0.0748721	0.0405697	0.00932345	0.0394485	0.192348	0.0791003	0.0207264	0.0998267	0.0583739
143.593	0.126834	0.111364	0.0153684	0.104153	0.0813052	0.0452605	0.0179284	0.0431375	0.184024	0.0810417	0.019831	0.100873	0.0612107
149.614	0.125557	0.110837	0.0124232	0.109466	0.0916855	0.0445047	0.0118492	0.0392114	0.215269	0.0845337	0.0231431	0.107677	0.0613905
155.636	0.112771	0.112007	0.0126727	0.113825	0.0989583	0.0480121	0.0102093	0.0294303	0.218942	0.084092	0.0236314	0.107723	0.0604606
161.658	0.110517	0.116154	0.00902396	0.123792	0.0985824	0.0475889	0.011889	0.0274547	0.207154	0.0835728	0.0230634	0.106636	0.0605095
167.679	0.16482	0.126161	0.00724456	0.148321	0.100817	0.0474599	0.0173635	0.0233059	0.200633	0.0929027	0.0253013	0.118204	0.0676014
173.701	0.197812	0.119577	0.00735092	0.218202	0.102957	0.0492	0.0151861	0.0325805	0.180932	0.102644	0.0288642	0.131508	0.0737799
179.724	0.15959	0.131937	0.00591513	0.259887	0.0900999	0.0499694	0.020591	0.0250193	0.180606	0.102624	0.0306061	0.13323	0.0720177
185.746	0.132751	0.142214	0.00778043	0.289953	0.0761939	0.0577241	0.016923	0.0252204	0.170106	0.102096	0.0323951	0.134491	0.0697011
191.77	0.130324	0.146353	0.00292083	0.301309	0.0563973	0.0568619	0.0215166	0.0230472	0.165259	0.100443	0.0338005	0.134244	0.0666428
197.792	0.145101	0.146406	0.00372259	0.30466	0.0539993	0.0611251	0.019409	0.0299799	0.163649	0.103117	0.0340797	0.137197	0.0690371
203.814	0.138376	0.15536	0.00320308	0.303363	0.0747235	0.0625755	0.0266104	0.013417	0.16441	0.104671	0.0340353	0.138706	0.0706355
209.838	0.121658	0.156213	0.00268358	0.311444	0.0677477	0.068925	0.0222234	0.0145664	0.164597	0.10334	0.0347389	0.138079	0.068601
215.861	0.124781	0.158424	0.00398438	0.325558	0.0783493	0.0723373	0.0263815	0.0137654	0.158307	0.106876	0.0356167	0.142493	0.0712598
221.883	0.117383	0.163291	0.000609665	0.328742	0.0866196	0.0687825	0.0275685	0.0164774	0.158458	0.107548	0.0359666	0.143515	0.0715815
227.905	0.124673	0.164134	0.00487612	0.344496	0.0962086	0.0746477	0.0343344	0.0140564	0.149305	0.111859	0.0368844	0.148743	0.0749745
233.928	0.11756	0.171018	0.000597393	0.352895	0.0975032	0.0783496	0.0511611	0.0170162	0.142258	0.114262	0.0372681	0.15153	0.0769939
239.949	0.102952	0.17147	-0.00519894	0.343112	0.0879111	0.0746477	0.0670769	0.0161002	0.143904	0.111331	0.0364372	0.147768	0.0748933
245.973	0.0903428	0.173426	-0.00129654	0.341874	0.0967634	0.0816624	0.0747338	0.0404542	0.137709	0.115074	0.0349456	0.15002	0.0801288
251.994	0.0973378	0.173376	-0.00102656	0.348984	0.102202	0.0849933	0.095298	0.0294878	0.132867	0.118169	0.035559	0.153728	0.0826099
258.016	0.0876943	0.187762	-0.00418039	0.361705	0.110475	0.0850612	0.102621	0.0338162	0.121742	0.120744	0.0371897	0.157934	0.0835545
264.039	0.0772973	0.190439	-0.00739557	0.378272	0.115047	0.0892926	0.116021	0.041029	0.111953	0.123551	0.0389091	0.16246	0.0846417
270.061	0.0589981	0.195199	-0.00346454	0.40164	0.126249	0.0866406	0.118037	0.060038	0.109843	0.128131	0.0411172	0.169248	0.087014
276.083	0.0537908	0.204515	-0.00463444	0.418113	0.125855	0.0953479	0.121578	0.0587521	0.0976966	0.130113	0.0432841	0.173397	0.0868286
282.106	0.0538548	0.213433	-0.00643838	0.434495	0.137942	0.0983642	0.126443	0.0562556	0.0941743	0.13428	0.0453675	0.179648	0.088913
288.127	0.0285337	0.211033	-0.00366907	0.431728	0.14134	0.0963979	0.130031	0.0478718	0.115431	0.133189	0.0457392	0.178928	0.0874495
294.149	0.0305795	0.213278	0.00168957	0.474295	0.137618	0.101039	0.130506	0.0570135	0.102276	0.138699	0.0497075	0.188407	0.0889918
300.172	0.022606	0.226305	-0.00398813	0.480027	0.133067	0.105531	0.116581	0.0508352	0.0923951	0.135929	0.0514528	0.187382	0.084476
306.194	0.0132515	0.222436	-0.000760675	0.503139	0.153913	0.109303	0.111953	0.0523582	0.0873955	0.139221	0.0540413	0.193262	0.0851795
312.218	0.0209886	0.236297	-0.00380815	0.535043	0.158845	0.115245	0.102596	0.05752	0.0891325	0.145762	0.0575047	0.203267	0.0882574
318.239	0.0186415	0.2451	-0.00125972	0.55682	0.150951	0.113853	0.114494	0.0643484	0.0862926	0.149916	0.0597709	0.209686	0.0901447
324.261	0.0138058	0.251486	-0.00493714	0.542752	0.156505	0.115971	0.123536	0.0728723	0.0803188	0.150257	0.0586052	0.208862	0.0916516
330.285	0.0156193	0.255628	-0.00130881	0.557857	0.153846	0.116811	0.127876	0.0633068	0.0834184	0.152561	0.0602018	0.212763	0.0923597
336.307	0.0223232	0.256469	-0.000605233	0.56732	0.154955	0.117691	0.110221	0.0676567	0.077018	0.152561	0.0611317	0.213693	0.0914293
342.329	0.0322991	0.256706	0.000679204	0.559068	0.163984	0.122264	0.110502	0.0804372	0.0757601	0.155744	0.0596149	0.215359	0.0961296
Pulse
LED stim.
LED calcium
Layer
Min (ctrl)	-0.0190222	-0.0243002	-0.00678608	-0.0243239	-0.0770639	-0.00573209	-0.00910322	-0.020966	-0.0062197
Max (ctrl)	0.00918686	0.0207609	0.00478613	0.0238611	0.0508464	0.00479906	0.00933589	0.0194947	0.00994841
Mean (ctrl)	1.85326e-16	2.5963e-16	-1.16064e-16	3.10805e-17	4.27898e-17	2.13633e-17	-1.17997e-16	1.19551e-16	-1.80917e-16
sd (ctrl)	0.00812943	0.0126355	0.00332724	0.0152063	0.0485563	0.00311632	0.00525859	0.0122219	0.00474727
1.960*sd	0.0159337	0.0247656	0.00652138	0.0298044	0.0951703	0.00610798	0.0103068	0.0239548	0.00930466
2.576*sd	0.0209414	0.032549	0.00857096	0.0391715	0.125081	0.00802763	0.0135461	0.0314835	0.012229
AUC (0-5)	7.56225	8.6917	2.70996	11.2281	8.16315	7.1338	3.2478	2.81856	9.54449	6.78887
Max (ctrl)	0.261392	0.453649	0.304322	0.480027	0.556852	0.398371	0.252545	0.229974	0.395952	0.370343
Durée à mi hauteur	125.527	47.258	51.08	48.534	49.811	71.323	45.984	44.717	59.279	60.3903
Durée à mi hauteur après stim	85.884	7.615	11.437	8.891	10.168	31.68	6.341	5.074	19.636	20.7473

## Sheet: 20 Hz
	BG-143				BG-146				BG-148				BG-150				BG-158				BG-159				BG-160				BG-162				BG-163
Time (s)	Time (s)	F (cell)	F (background)	F (cell-background)	Time (s)	F (cell)	F (background)	F (cell-background)	Time (s)	F (cell)	F (background)	F (cell-background)	Time (s)	F (cell)	F (background)	F (cell-background)	Time (s)	F (cell)	F (background)	F (cell-background)	Time (s)	F (cell)	F (background)	F (cell-background)	Time (s)	F (cell)	F (background)	F (cell-background)	Time (s)	F (cell)	F (background)	F (cell-background)	Time (s)	F (cell)	F (background)	F (cell-background)
0.224	0.227	2802.16	1693.71	1108.45	0.23	1994.35	870.861	1123.49	0.228	1904.78	1174.03	730.749	0.227	926.027	699	227.027	0.248	2726.75	945.675	1781.08	0.228	1074.48	604.611	469.867	0.227	1435.42	1154.51	280.916	0.248	1375.96	926.701	449.261	0.229	1751.39	1339.73	411.661
1.462	1.52	2795.36	1689.15	1106.21	1.526	1993.21	868.141	1125.07	1.523	1899.99	1172.35	727.64	1.521	925.008	696.69	228.318	1.516	2747.04	942.96	1804.08	1.525	1069.78	602.147	467.635	1.516	1434.46	1151.65	282.819	1.525	1376	923.365	452.633	1.525	1748.93	1336.47	412.453
2.721	2.796	2797.16	1685.12	1112.05	2.802	1989.95	866.522	1123.43	2.791	1898.65	1171.3	727.344	2.789	924.073	695.983	228.09	2.785	2764.95	938.575	1826.37	2.795	1070.23	601.606	468.621	2.781	1434.06	1150.75	283.307	2.8	1375.62	921.814	453.806	2.8	1746.51	1333.8	412.711
3.979	4.071	2791.43	1680.26	1111.17	4.073	1992.86	864.923	1127.94	4.059	1899.72	1170.39	729.33	4.06	922.964	694.914	228.05	4.061	2780.57	933.787	1846.78	4.068	1071.02	601.291	469.727	4.055	1434.12	1149.38	284.74	4.077	1372.91	920.436	452.472	4.077	1746.87	1331.89	414.982
5.236	5.351	2793.66	1675.53	1118.13	5.344	1990.27	863.099	1127.17	5.326	1896.48	1169.34	727.14	5.328	922.722	693.852	228.87	5.34	2800.51	930.857	1869.66	5.338	1068.29	600.621	467.671	5.332	1435.34	1148.08	287.263	5.347	1370.6	919.312	451.291	5.349	1743.84	1329.67	414.168
6.492	6.62	2789.91	1670.23	1119.67	6.614	1990.46	861.319	1129.14	6.592	1899.41	1168.62	730.785	6.599	921.43	693.046	228.384	6.618	2812.82	928.984	1883.84	6.606	1068.23	600.107	468.126	6.608	1433.85	1146.51	287.336	6.622	1368.04	918.375	449.664	6.627	1743.78	1327.61	416.171
7.75	7.894	2784.98	1664.47	1120.51	7.888	1989.24	859.776	1129.46	7.866	1898.5	1167.88	730.621	7.874	920.72	692.218	228.502	7.891	2828.58	926.722	1901.86	7.872	1068.28	599.513	468.768	7.887	1434.88	1145.15	289.728	7.894	1369.14	917.034	452.105	7.897	1741.33	1325.4	415.928
9.005	9.168	2788.03	1658.58	1129.45	9.155	1987.67	858.026	1129.64	9.143	1894.65	1166.9	727.751	9.152	920.318	690.833	229.485	9.165	2839.97	925.32	1914.65	9.151	1069.31	599.146	470.16	9.157	1432.87	1143.91	288.965	9.162	1369.12	915.686	453.438	9.171	1737.89	1322.88	415.004
10.256	10.435	2783.28	1652.05	1131.23	10.425	1984.53	856.514	1128.01	10.418	1893.05	1166.36	726.691	10.426	919.717	690.083	229.634	10.44	2846.89	923.816	1923.07	10.428	1068.39	598.699	469.689	10.432	1433.81	1142.83	290.979	10.431	1366.48	914.498	451.981	10.444	1738.52	1320.57	417.949
11.512	11.703	2774.48	1647	1127.48	11.704	1984.94	854.923	1130.02	11.694	1893.51	1165.43	728.073	11.701	918.599	689.261	229.338	11.713	2857.96	922.286	1935.68	11.708	1067.14	598.088	469.05	11.707	1434.21	1141.5	292.706	11.711	1364.52	913.408	451.115	11.713	1735.3	1318.06	417.241
12.765	12.972	2774.91	1641.32	1133.59	12.978	1982.36	853.034	1129.32	12.965	1892.69	1164.04	728.65	12.972	918.372	688.19	230.182	12.988	2872.2	921.072	1951.13	12.981	1067.35	597.534	469.82	12.979	1434.28	1139.81	294.462	12.991	1365.81	911.875	453.935	12.985	1731.74	1316.47	415.269
14.018	14.247	2772.33	1635.82	1136.51	14.255	1977.75	851.644	1126.11	14.24	1891.24	1163.31	727.933	14.245	917.079	687.402	229.677	14.259	2877.21	919.39	1957.82	14.259	1069.55	597.122	472.426	14.25	1434.95	1138.76	296.196	14.267	1364.51	910.74	453.773	14.265	1731.05	1313.67	417.376
15.277	15.523	2775.3	1630.5	1144.8	15.529	1977.23	849.975	1127.25	15.508	1885.41	1162.22	723.188	15.518	916.15	686.481	229.669	15.53	2881.74	918.08	1963.66	15.532	1068.11	596.553	471.555	15.52	1432.42	1136.92	295.498	15.542	1360.74	909.703	451.038	15.544	1729.22	1311.6	417.614
16.537	16.8	2772.2	1625.29	1146.9	16.806	1975.6	848.187	1127.41	16.777	1887.28	1161.37	725.912	16.786	915.203	685.874	229.329	16.807	2886.12	916.745	1969.38	16.802	1068.18	596.391	471.788	16.795	1436.87	1135.57	301.303	16.817	1359.01	908.487	450.525	16.822	1730.56	1309.57	420.992
17.798	18.074	2759.57	1620.3	1139.27	18.074	1975.89	846.602	1129.29	18.045	1887.22	1160.51	726.703	18.055	912.417	684.733	227.684	18.082	2890.64	915.205	1975.44	18.071	1068.16	595.69	472.467	18.073	1434.75	1133.92	300.827	18.093	1357.75	907.349	450.397	18.099	1726.42	1307.43	418.991
19.056	19.349	2762.63	1615.44	1147.2	19.348	1974.37	845.095	1129.27	19.312	1882.92	1159.72	723.201	19.323	912.057	683.755	228.302	19.36	2895.62	913.566	1982.06	19.34	1066.44	595.291	471.145	19.349	1436.12	1132.61	303.515	19.362	1358.76	906.193	452.569	19.373	1723.83	1304.58	419.254
20.305	20.625	2767.08	1610.89	1156.18	20.62	1976.31	843.554	1132.76	20.579	1884.3	1158.38	725.922	20.6	910.132	682.886	227.246	20.635	2904.18	912.26	1991.92	20.607	1067.86	594.612	473.25	20.624	1437.08	1131.25	305.824	20.634	1355.97	904.65	451.324	20.646	1724.33	1302.38	421.946
21.562	21.894	2765.84	1606.09	1159.75	21.89	1975.46	842.202	1133.26	21.86	1887.53	1157.71	729.82	21.878	908.632	682.05	226.582	21.91	2904.33	910.879	1993.45	21.883	1068.11	594.2	473.905	21.901	1440.12	1130.14	309.988	21.906	1354.05	903.523	450.531	21.914	1721.6	1299.99	421.607
22.82	23.168	2754.01	1601.38	1152.62	23.16	1977.17	840.319	1136.85	23.136	1887.23	1156.86	730.363	23.152	908.114	681.223	226.891	23.184	2911.67	909.576	2002.1	23.16	1068.89	593.957	474.937	23.171	1438.97	1128.38	310.594	23.173	1353.62	902.305	451.319	23.183	1717.41	1297.88	419.532
24.07	24.438	2757.4	1596.95	1160.45	24.436	1976.55	838.925	1137.62	24.41	1886.78	1156.11	730.668	24.429	906.554	680.304	226.25	24.454	2911.51	907.852	2003.66	24.436	1066.49	593.386	473.108	24.446	1439.36	1127.11	312.246	24.445	1354.25	901.698	452.55	24.451	1716.61	1295.71	420.903
25.321	25.708	2751.66	1592.1	1159.56	25.715	1976.41	837.412	1139	25.685	1881.03	1155.04	725.987	25.703	907.783	679.382	228.401	25.726	2919.17	906.957	2012.21	25.711	1067.01	593.032	473.973	25.718	1438.11	1126.06	312.05	25.725	1351.82	900.547	451.277	25.721	1717.13	1293.61	423.522
26.573	26.975	2753.8	1587.4	1166.4	26.991	1976.92	836.308	1140.61	26.955	1882.22	1154.02	728.209	26.974	906.217	678.682	227.535	26.995	2930.53	905.324	2025.2	26.979	1068.28	592.509	475.767	26.989	1439.74	1124.59	315.151	27.002	1351.57	899.442	452.123	27.001	1712.43	1291.46	420.973
27.83	28.254	2755.15	1582.47	1172.68	28.27	1973.54	834.824	1138.72	28.23	1880.32	1153.05	727.269	28.246	904.022	677.699	226.323	28.268	2941.74	903.887	2037.86	28.252	1065.48	591.867	473.618	28.256	1439.55	1123.36	316.194	28.282	1352.08	898.412	453.663	28.28	1708.22	1288.74	419.483
29.091	29.533	2747.01	1578.5	1168.52	29.545	1974.86	833.316	1141.55	29.499	1880.31	1152.04	728.263	29.516	905.293	676.734	228.559	29.541	2949.92	902.535	2047.38	29.523	1065.87	591.354	474.514	29.532	1441.27	1121.7	319.568	29.556	1351.96	897.129	454.828	29.556	1707.73	1286.79	420.944
30.351	30.807				30.819				30.772				30.782				30.819				30.793				30.811				30.829				30.831
31.608	32.083				32.094				32.04				32.049				32.094				32.066				32.091				32.104				32.107
32.868	33.354				33.362				33.309				33.328				33.373				33.336				33.367				33.37				33.384
34.123	34.629				34.633				34.584				34.606				34.646				34.612				34.642				34.64				34.658
35.378	35.903				35.904				35.864				35.88				35.92				35.892				35.92				35.908				35.928
36.63	37.171				37.183				37.137				37.156				37.191				37.167				37.194				37.179				37.197
37.883	38.441				38.462				38.41				38.432				38.465				38.444				38.467				38.457				38.466
39.134	39.711				39.742				39.68				39.704				39.733				39.719				39.736				39.735				39.741
40.386	40.988	3452.43	1535.7	1916.73	41.017	2047.17	818.087	1229.08	40.949	2337.44	1137.78	1199.66	40.971	1112.32	667.54	444.776	41.003	3422.42	887.085	2535.34	40.989	1898.37	587.536	1310.83	41.003	1786.53	1105.39	681.145	41.013	1500.53	882.882	617.651	41.018	2120.59	1262.86	857.733
41.643	42.268	3321.09	1531.53	1789.56	42.292	2021.38	816.422	1204.96	42.217	2283.63	1136.68	1146.95	42.237	1072.81	666.628	406.185	42.272	3372.57	885.381	2487.19	42.264	1877.95	587.017	1290.93	42.271	1730.96	1103.97	626.991	42.292	1472.07	881.796	590.272	42.295	2047.52	1261.2	786.314
42.901	43.546	3226.55	1527.83	1698.72	43.567	1998.62	815.25	1183.37	43.487	2235.05	1135.71	1099.34	43.505	1042.06	665.808	376.256	43.551	3336.78	883.877	2452.9	43.532	1851.96	586.323	1265.63	43.548	1688.22	1102.57	585.659	43.563	1447.79	880.509	567.283	43.567	1990.09	1258.92	731.17
44.159	44.82	3152.4	1523.97	1628.42	44.836	1979.43	814.22	1165.21	44.755	2189.24	1134.82	1054.42	44.775	1018.59	665.049	353.54	44.829	3301.88	882.615	2419.26	44.805	1825.48	585.699	1239.78	44.826	1650.38	1101.47	548.911	44.839	1431.13	879.567	551.561	44.844	1944.49	1256.9	687.599
45.414	46.093	3084.12	1520	1564.12	46.109	1965.51	812.836	1152.67	46.024	2150.57	1133.92	1016.65	46.048	1000.83	664.351	336.479	46.109	3278.01	881.317	2396.7	46.073	1799.23	585.28	1213.95	46.106	1617.16	1099.7	517.456	46.11	1418.82	878.81	540.013	46.116	1909.01	1254.65	654.361
46.671	47.367	3029.39	1516.24	1513.15	47.379	1954.51	811.669	1142.84	47.3	2115.04	1133.14	981.895	47.327	982.753	663.499	319.254	47.38	3258.53	879.801	2378.73	47.345	1773.44	584.63	1188.81	47.374	1594.38	1098.88	495.505	47.38	1404.15	877.732	526.423	47.391	1874.87	1252.82	622.05
47.929	48.636	2982.23	1512.44	1469.79	48.651	1941.67	810.26	1131.41	48.576	2087.18	1132.51	954.664	48.601	970.173	662.854	307.319	48.654	3247.36	878.045	2369.31	48.623	1746.16	583.911	1162.25	48.65	1575.29	1097.18	478.107	48.649	1396.01	877.133	518.88	48.666	1849.62	1250.9	598.722
49.18	49.908	2952.02	1507.93	1444.1	49.926	1937.09	809.119	1127.97	49.853	2061.91	1131.44	930.468	49.876	959.473	661.729	297.744	49.93	3230.53	876.742	2353.78	49.9	1722.26	583.415	1138.85	49.925	1559.24	1095.81	463.424	49.917	1390.53	875.943	514.59	49.938	1828.74	1248.45	580.292
50.431	51.181	2928.86	1504.46	1424.39	51.205	1937.39	808.013	1129.38	51.13	2037.94	1130.69	907.247	51.148	950.519	661.257	289.262	51.204	3215.44	875.481	2339.95	51.173	1696.06	582.928	1113.13	51.195	1543.19	1094.94	448.252	51.193	1383.57	875.446	508.126	51.208	1807.38	1246.59	560.784
51.681	52.449	2900.24	1500.25	1399.99	52.481	1931.76	806.648	1125.11	52.403	2026.07	1130.33	895.741	52.422	942.911	660.48	282.431	52.479	3219.03	873.811	2345.21	52.449	1672.83	582.561	1090.27	52.464	1531.47	1093.32	438.154	52.468	1377.62	874.41	503.215	52.485	1792.12	1244.94	547.178
52.52	53.361	2887.11	1497.97	1389.14	53.392	1931.62	805.793	1125.83	53.315	2010.57	1129.42	881.152	53.331	936.975	659.816	277.159	53.387	3219.5	872.957	2346.55	53.36	1657.03	582.388	1074.64	53.37	1523.27	1092.49	430.779	53.381	1373.88	873.579	500.296	53.396	1783.53	1243.44	540.088
58.542	59.384	2817.04	1480.79	1336.24	59.415	1938.65	801.127	1137.53	59.337	1953.09	1127.25	825.842	59.354	915.791	657.314	258.477	59.41	3224.86	867.461	2357.4	59.382	1556.71	581.184	975.531	59.393	1491.41	1088.42	402.996	59.404	1357.05	870.739	486.31	59.42	1733.37	1235.14	498.23
64.565	65.407	2784	1463.57	1320.43	65.438	1925.96	795.53	1130.43	65.36	1917.2	1123.76	793.436	65.377	904.223	653.825	250.398	65.433	3224.02	860.867	2363.16	65.405	1475.73	579.049	896.677	65.415	1474.08	1083.1	390.98	65.427	1346.97	866.451	480.522	65.443	1704.8	1225.88	478.923
70.587	71.43	2759.48	1447.99	1311.49	71.461	1914.83	790.385	1124.44	71.382	1899.13	1121.02	778.113	71.4	896.226	650.516	245.71	71.457	3218.84	855.081	2363.76	71.429	1408.19	577.391	830.804	71.439	1463.46	1078.03	385.429	71.45	1340.86	862.263	478.601	71.467	1681.5	1216.95	464.544
76.608	77.452	2756.45	1432.55	1323.9	77.485	1883.27	785.056	1098.21	77.405	1884.66	1117.31	767.344	77.423	887.769	647.103	240.666	77.479	3220.6	849.176	2371.42	77.451	1349.55	575.346	774.208	77.462	1456.24	1072.79	383.447	77.473	1333.16	858.181	474.978	77.491	1668.55	1207.91	460.639
82.632	83.475	2750.07	1418.29	1331.78	83.506	1863.32	779.822	1083.5	83.428	1870.93	1113.47	757.455	83.445	882.39	643.799	238.591	83.502	3230.74	843.405	2387.34	83.475	1296.28	573.354	722.924	83.484	1448.62	1067.6	381.019	83.496	1327.11	854.339	472.773	83.514	1682.74	1199	483.744
88.653	89.497	2738.51	1403.67	1334.84	89.531	1852.11	774.909	1077.2	89.451	1867.39	1109.67	757.719	89.469	878.134	640.641	237.493	89.526	3247.41	837.453	2409.95	89.5	1255.61	571.641	683.965	89.508	1448.66	1062.56	386.105	89.519	1321.35	850.535	470.814	89.538	1669.2	1190.24	478.962
94.676	95.52	2729.4	1389.45	1339.95	95.554	1848.75	770.063	1078.69	95.474	1859.11	1106.37	752.744	95.491	873.518	637.877	235.641	95.549	3270.96	832.045	2438.92	95.522	1221.14	570.232	650.91	95.531	1443.54	1057.66	385.88	95.541	1318.14	846.981	471.16	95.562	1650.93	1181.83	469.1
100.698	101.542	2721.19	1375.72	1345.48	101.576	1847.23	764.382	1082.85	101.497	1854.43	1102.71	751.717	101.514	871.1	634.737	236.363	101.573	3274.52	826.81	2447.71	101.546	1197.51	568.236	629.272	101.554	1438.19	1052.6	385.594	101.563	1317.47	843.695	473.772	101.584	1641.61	1174.04	467.571
106.721	107.565	2722.87	1361.84	1361.03	107.6	1839.62	760.14	1079.48	107.52	1850.09	1099.21	750.876	107.538	866.217	631.693	234.524	107.597	3278.23	821.49	2456.74	107.569	1177.74	566.65	611.093	107.579	1434.44	1047.63	386.809	107.586	1313.58	839.624	473.957	107.608	1633.27	1165.83	467.446
112.743	113.586	2720.24	1348.29	1371.94	113.623	1832.47	755.065	1077.4	113.543	1846.93	1095.88	751.052	113.561	863.973	628.687	235.286	113.62	3304.52	816.327	2488.19	113.592	1160.83	564.612	596.218	113.602	1431.37	1042.78	388.589	113.608	1310.05	836.185	473.868	113.631	1621.03	1157.95	463.075
118.765	119.609	2713.53	1334.74	1378.79	119.647	1816.73	751.247	1065.49	119.567	1849.3	1091.27	758.032	119.585	860.931	625.784	235.147	119.643	3300.98	811.424	2489.56	119.616	1150.1	563.168	586.928	119.625	1428.88	1038.29	390.587	119.63	1304.18	832.444	471.737	119.654	1606.84	1149.75	457.09
124.788	125.631	2715.07	1321.74	1393.32	125.67	1799.18	746.893	1052.29	125.59	1842.43	1087.62	754.818	125.608	860.684	623.174	237.51	125.667	3308.26	806.426	2501.83	125.64	1138.48	561.16	577.32	125.648	1426.01	1033.83	392.185	125.653	1304.17	829.174	474.998	125.678	1597.67	1141.48	456.186
130.812	131.653	2723.95	1308.63	1415.32	131.693	1822.74	742.905	1079.84	131.612	1842.9	1084.94	757.957	131.63	857.017	620.419	236.598	131.689	3327.28	802.129	2525.15	131.663	1127.69	558.806	568.885	131.671	1419.94	1029.47	390.478	131.675	1302.67	825.99	476.678	131.702	1587.53	1133.78	453.743
136.836	137.676	2738.22	1294.73	1443.49	137.716	1855.9	737.954	1117.94	137.636	1841.52	1081.79	759.73	137.653	855.679	617.853	237.826	137.712	3352.3	797.26	2555.04	137.687	1121.33	557.346	563.982	137.694	1414.92	1025.34	389.582	137.697	1301.46	822.831	478.634	137.725	1580.16	1126.09	454.078
142.858	143.698	2724.09	1281.86	1442.23	143.74	1867.72	734.315	1133.4	143.659	1843.23	1078.37	764.867	143.675	852.333	614.917	237.416	143.735	3362.99	792.855	2570.13	143.71	1116.56	555.881	560.678	143.717	1403.94	1020.72	383.218	143.721	1296.6	819.649	476.947	143.749	1570.54	1118.59	451.947
148.88	149.721	2721.22	1269.62	1451.6	149.762	1874.85	731.026	1143.82	149.682	1841.74	1075.05	766.683	149.697	849.625	612.644	236.981	149.758	3377.74	788.372	2589.37	149.732	1111.11	554.592	556.521	149.74	1400.26	1016.41	383.847	149.744	1295.4	816.483	478.922	149.771	1565.33	1111.44	453.887
154.901	155.745	2719.59	1257.5	1462.08	155.786	1862.22	727.27	1134.95	155.705	1837.54	1071.62	765.922	155.72	845.884	610.112	235.772	155.781	3399.91	783.151	2616.76	155.756	1104.78	553.416	551.365	155.763	1398.7	1012.58	386.127	155.768	1291.72	813.349	478.367	155.794	1557.36	1104.12	453.237
160.923	161.767	2717.96	1245.85	1472.11	161.809	1884.35	723.589	1160.76	161.727	1842.42	1068.21	774.205	161.743	844.74	607.549	237.191	161.804	3409.62	777.053	2632.57	161.779	1103.85	551.894	551.96	161.785	1397	1007.97	389.031	161.791	1288.37	810.223	478.148	161.818	1550.84	1096.67	454.173
166.946	167.789	2709.14	1234.88	1474.27	167.831	1893.38	720.092	1173.29	167.751	1841.3	1065.13	776.171	167.765	841.344	605.106	236.238	167.826	3424.04	773.6	2650.44	167.803	1100.18	550.625	549.555	167.807	1395.22	1004.38	390.846	167.815	1287.93	806.912	481.015	167.84	1544.76	1090.12	454.648
172.97	173.812	2721.58	1224.22	1497.35	173.855	1889.74	716.611	1173.13	173.774	1842.22	1062.32	779.906	173.789	840.854	602.701	238.153	173.85	3439.13	770.385	2668.75	173.827	1099.14	549.057	550.079	173.831	1396.86	999.921	396.941	173.839	1283.58	804.174	479.408	173.863	1535.71	1082.76	452.954
178.991	179.834	2716.94	1213.4	1503.55	179.878	1888.69	713.297	1175.39	179.798	1837.62	1058.92	778.696	179.812	837.748	600.48	237.268	179.873	3489.99	767.076	2722.91	179.85	1093.87	547.971	545.903	179.854	1388.29	995.888	392.4	179.861	1283.12	800.962	482.16	179.885	1530.91	1076.12	454.786
185.014	185.857	2724.66	1202.49	1522.17	185.902	1888.38	710.278	1178.1	185.821	1835.46	1056.06	779.405	185.835	836.701	598.319	238.382	185.897	3530.47	763.979	2766.49	185.873	1095.24	546.916	548.328	185.878	1385.82	991.859	393.96	185.884	1278.69	798.176	480.513	185.909	1524.48	1069.37	455.107
191.036	191.879	2715.61	1192.45	1523.15	191.926	1932	707.149	1224.85	191.844	1831.11	1052.68	778.437	191.859	833.826	595.998	237.828	191.92	3563.1	760.684	2802.41	191.898	1093.65	545.407	548.247	191.902	1379.71	988.127	391.579	191.908	1276.52	795.259	481.259	191.932	1518.55	1062.91	455.648
197.059	197.902	2702.64	1182.27	1520.37	197.95	1943.2	703.874	1239.32	197.867	1826.4	1049.68	776.727	197.881	832.445	594.037	238.408	197.942	3588.29	757.164	2831.12	197.921	1091.04	544.095	546.944	197.923	1376.27	984.797	391.471	197.931	1275.52	792.788	482.735	197.956	1515.39	1056.98	458.409
203.081	203.925	2692.12	1172.07	1520.05	203.973	1951.52	700.266	1251.25	203.89	1818.92	1046.86	772.058	203.906	830.739	591.777	238.962	203.966	3588.34	753.447	2834.89	203.946	1090.53	543.01	547.521	203.947	1375.21	980.684	394.527	203.953	1274.19	790.216	483.974	203.978	1507.68	1050.85	456.826
209.102	209.947	2679.07	1163.04	1516.03	209.997	1955.57	697.186	1258.39	209.913	1811.57	1043.81	767.766	209.931	829.598	589.798	239.8	209.989	3598.09	749.791	2848.3	209.968	1091.71	541.882	549.824	209.97	1369.01	977.134	391.875	209.976	1270.38	787.545	482.837	210.002	1502.46	1044.73	457.73
215.124	215.97	2676.62	1153.72	1522.91	216.019	1957.45	694.523	1262.93	215.936	1802.31	1040.27	762.04	215.953	826.878	587.577	239.301	216.012	3626.61	746.294	2880.31	215.99	1090.06	540.762	549.297	215.994	1369.51	973.27	396.239	215.998	1268.36	785.417	482.946	216.025	1495.7	1038.62	457.071
221.148	221.992	2690.05	1144.76	1545.29	222.043	1972.86	691.935	1280.92	221.96	1797.03	1036.59	760.447	221.977	826.777	585.537	241.24	222.035	3666.91	743.35	2923.56	222.013	1090.09	539.193	550.896	222.018	1366.13	969.724	396.405	222.022	1265.91	782.572	483.342	222.048	1489.82	1032.3	457.519
227.17	228.015	2686.82	1141.99	1544.83	228.065	2009.28	689.244	1320.04	227.983	1797.37	1033.83	763.538	228	825.478	583.501	241.977	228.06	3682.71	740.138	2942.57	228.034	1090.89	538.041	552.854	228.041	1370.17	966.086	404.087	228.045	1264.56	780.065	484.493	228.072	1483.64	1026.5	457.138
233.192	234.037	2694.43	1133.69	1560.73	234.089	2017.99	686.8	1331.19	234.006	1794.9	1030.8	764.099	234.023	821.87	581.661	240.209	234.083	3687.35	737.276	2950.07	234.057	1088.79	537.274	551.52	234.065	1362.57	962.264	400.305	234.068	1263.42	777.711	485.711	234.094	1477.72	1021.04	456.684
239.214	240.06	2691.72	1124.23	1567.48	240.112	2017.04	684.2	1332.84	240.028	1791.55	1027.95	763.595	240.046	820.366	579.656	240.71	240.106	3700.52	733.952	2966.57	240.08	1089.06	535.791	553.269	240.089	1360.93	958.972	401.956	240.093	1264.86	775.41	489.454	240.115	1474.6	1015	459.601
245.235	246.082	2706.43	1115.27	1591.17	246.134	1994.85	681.69	1313.16	246.05	1788.39	1025.16	763.228	246.069	820.687	578.023	242.664	246.129	3718.23	731.325	2986.9	246.103	1089.65	534.643	555.01	246.112	1363.08	955.742	407.338	246.118	1265.5	772.926	492.571	246.139	1469.23	1009.4	459.832
251.258	252.106	2704.76	1106.86	1597.9	252.157	1985.17	679.095	1306.07	252.073	1789.86	1022.28	767.578	252.091	819.101	576.146	242.955	252.152	3735.4	728.218	3007.18	252.126	1088.27	533.499	554.773	252.136	1362.53	952.032	410.498	252.14	1263.26	770.529	492.731	252.163	1467.03	1003.93	463.106
257.28	258.128	2697.85	1099.11	1598.74	258.181	1987.94	676.642	1311.3	258.096	1789.22	1019.65	769.573	258.115	818.538	574.471	244.067	258.175	3762.7	725.238	3037.46	258.15	1087.12	532.417	554.699	258.16	1355.09	948.45	406.644	258.164	1265.45	768.326	497.124	258.186	1461.99	998.437	463.553
263.304	264.151	2700.93	1091.7	1609.23	264.205	1984.41	674.057	1310.36	264.12	1788.1	1016.8	771.297	264.137	817.479	572.674	244.805	264.199	3777.03	722.377	3054.65	264.174	1087.83	531.46	556.368	264.183	1355.29	944.965	410.327	264.187	1262.23	766.047	496.18	264.21	1456.29	993.007	463.281
269.328	270.173	2696.91	1084.14	1612.77	270.228	1984.28	671.691	1312.59	270.143	1782.5	1014.44	768.061	270.16	814.073	570.851	243.222	270.222	3782.33	719.599	3062.73	270.197	1089.15	530.398	558.755	270.207	1352.16	941.729	410.436	270.209	1260.28	763.703	496.579	270.232	1453.94	987.847	466.09
275.35	276.196	2691.74	1077.02	1614.72	276.253	1985.52	669.28	1316.24	276.165	1777.66	1011.67	765.99	276.182	814.417	569.484	244.933	276.246	3781.02	716.89	3064.13	276.221	1089.4	529.57	559.827	276.23	1348.61	938.651	409.961	276.233	1258.96	761.26	497.697	276.257	1446.65	982.468	464.186
281.372	282.218	2696.85	1069.69	1627.16	282.276	1989.7	666.811	1322.89	282.186	1776.86	1009	767.867	282.205	812.04	567.561	244.479	282.268	3803.27	714.23	3089.04	282.245	1087.8	528.497	559.306	282.251	1349.88	935.705	414.17	282.256	1259.98	759.57	500.412	282.28	1440.85	977.221	463.63
287.395	288.242	2700.05	1062.74	1637.31	288.3	1987.28	664.665	1322.61	288.21	1772.65	1005.84	766.811	288.228	809.031	565.982	243.049	288.291	3833.62	711.739	3121.88	288.269	1090.12	527.544	562.578	288.276	1351.2	933.012	418.188	288.279	1256.19	757.287	498.908	288.303	1435.54	971.871	463.672
293.417	294.264	2694.25	1055.91	1638.34	294.323	1987.52	662.215	1325.31	294.233	1771.12	1003.59	767.534	294.252	808.067	564.323	243.744	294.314	3822.63	709.204	3113.42	294.291	1087.5	526.091	561.408	294.301	1350.27	929.98	420.293	294.302	1252.08	755.039	497.038	294.326	1426.91	966.49	460.416
299.439	300.286	2704.38	1049.26	1655.13	300.346	1996.73	660.259	1336.47	300.256	1772.91	1001.12	771.785	300.276	807.025	562.933	244.092	300.337	3841.26	706.816	3134.45	300.314	1091.18	525.397	565.786	300.323	1343.72	926.842	416.88	300.325	1254.2	753.256	500.946	300.349	1427.72	961.515	466.206
305.462	306.309	2709.43	1042.91	1666.52	306.369	2012.34	658.225	1354.11	306.28	1769.81	998.658	771.153	306.3	806.444	561.39	245.054	306.36	3859.22	704.361	3154.86	306.338	1090.53	524.375	566.156	306.346	1340.39	923.723	416.664	306.348	1255.95	751.323	504.631	306.372	1421.96	957.087	464.869
311.484	312.331	2704.04	1036.47	1667.57	312.393	2028.61	655.902	1372.7	312.302	1766.21	996.204	770.009	312.323	805.723	559.901	245.822	312.383	3874.01	702.06	3171.95	312.361	1093.42	523.533	569.887	312.368	1334.22	920.581	413.638	312.373	1255.46	749.144	506.312	312.395	1412.19	951.973	460.217
317.508	318.354	2710.91	1030.82	1680.09	318.415	2038.4	654.031	1384.37	318.325	1765.77	993.385	772.384	318.345	804.847	558.3	246.547	318.406	3891.06	699.681	3191.38	318.383	1091.61	522.434	569.171	318.392	1334.07	917.089	416.981	318.396	1256.04	747.258	508.785	318.418	1409.79	947.304	462.481
323.53	324.376	2720.48	1024.87	1695.6	324.44	2044.08	652.148	1391.93	324.35	1762.75	990.816	771.937	324.369	803.741	556.998	246.743	324.431	3895.9	697.28	3198.62	324.406	1092.4	521.492	570.906	324.415	1332.33	913.733	418.597	324.418	1257.04	745.168	511.867	324.441	1406.96	942.473	464.487
329.552	330.399	2703.59	1018.77	1684.82	330.464	2062.33	649.433	1412.9	330.372	1762.82	988.298	774.518	330.392	802.363	555.63	246.733	330.456	3903.72	695.004	3208.72	330.428	1092.7	520.784	571.918	330.439	1329.89	910.752	419.141	330.442	1255.69	743.392	512.297	330.464	1401.33	937.896	463.434
335.575	336.421	2717.09	1012.84	1704.25	336.487	2068.87	647.505	1421.36	336.397	1762.54	986.194	776.346	336.414	801.724	554.01	247.714	336.478	3910.17	692.641	3217.53	336.452	1090.32	519.77	570.55	336.461	1330.41	908.168	422.242	336.465	1253.43	741.508	511.918	336.486	1399.25	933.81	465.441
341.597	342.445	2725.83	1006.67	1719.16	342.511	2081.41	645.515	1435.89	342.421	1758.88	983.059	775.819	342.438	800.401	552.653	247.748	342.501	3920.35	690.612	3229.73	342.475	1094.16	518.882	575.275	342.484	1327.74	905.401	422.342	342.489	1254.08	739.599	514.479	342.51	1393.33	929.716	463.609
		BG-143				BG-146				BG-148				BG-150			BG-158				BG-159				BG-160				BG-162				BG-163
		F (cell)	F (background)	F (cell-background)		F (cell)	F (background)	F (cell-background)		F (cell)	F (background)	F (cell-background)		F (cell)	F (background)	F (cell-background)		F (cell)	F (background)	F (cell-background)		F (cell)	F (background)	F (cell-background)		F (cell)	F (background)	F (cell-background)		F (cell)	F (background)	F (cell-background)		F (cell)	F (background)	F (cell-background)
Pulse	Pulse	10s;2hz;5ms	10s;2hz;5ms	10s;2hz;5ms	Pulse	10s;2hz;5ms	10s;2hz;5ms	10s;2hz;5ms	Pulse	10s;2hz;5ms	10s;2hz;5ms	10s;2hz;5ms	Pulse	10s;2hz;5ms	10s;2hz;5ms	10s;2hz;5ms	Pulse	10s;2hz;5ms	10s;2hz;5ms	10s;2hz;5ms	Pulse	10s;2hz;5ms	10s;2hz;5ms	10s;2hz;5ms	Pulse	10s;2hz;5ms	10s;2hz;5ms	10s;2hz;5ms	Pulse	10s;2hz;5ms	10s;2hz;5ms	10s;2hz;5ms	Pulse	10s;2hz;5ms	10s;2hz;5ms	10s;2hz;5ms
LED stim.	LED stim.	0.25	0.25	0.25	LED stim.	0.25	0.25	0.25	LED stim.	0.25	0.25	0.25	LED stim.	0.25	0.25	0.25	LED stim.	0.25	0.25	0.25	LED stim.	0.25	0.25	0.25	LED stim.	0.25	0.25	0.25	LED stim.	0.25	0.25	0.25	LED stim.	0.25	0.25	0.25
LED calcium	LED calcium	0.05	0.05	0.05	LED calcium	0.05	0.05	0.05	LED calcium	0.05	0.05	0.05	LED calcium	0.05	0.05	0.05	LED calcium	0.05	0.05	0.05	LED calcium	0.05	0.05	0.05	LED calcium	0.05	0.05	0.05	LED calcium	0.05	0.05	0.05	LED calcium	0.05	0.05	0.05
Layer	Layer	II/III	II/III	II/III	Layer	II/III	II/III	II/III	Layer	II/III	II/III	II/III	Layer	II/III	II/III	II/III	Layer	II/III	II/III	II/III	Layer	II/III	II/III	II/III	Layer	II/III	II/III	II/III	Layer	II/III	II/III	II/III	Layer	II/III	II/III	II/III
Min (ctrl)	Min (ctrl)	2709.14	1202.49	1106.21	Min (ctrl)	1799.18	710.278	1052.29	Min (ctrl)	1835.46	1056.06	723.188	Min (ctrl)	836.701	598.319	226.25	Min (ctrl)	2726.75	763.979	1781.08	Min (ctrl)	1065.48	537.274	467.635	Min (ctrl)	1362.57	962.264	280.916	Min (ctrl)	1263.42	777.711	449.261	Min (ctrl)	1477.72	1021.04	411.661
Max (ctrl)	Max (ctrl)	2802.16	1693.71	1172.68	Max (ctrl)	1994.35	870.861	1141.55	Max (ctrl)	1904.78	1174.03	730.785	Max (ctrl)	926.027	699	230.182	Max (ctrl)	2949.92	945.675	2047.38	Max (ctrl)	1074.48	604.611	475.767	Max (ctrl)	1441.27	1154.51	319.568	Max (ctrl)	1376	926.701	454.828	Max (ctrl)	1751.39	1339.73	423.522
Mean (ctrl)	Mean (ctrl)	2773.72	1635.02	1138.7	Mean (ctrl)	1982	851.063	1130.93	Mean (ctrl)	1890.63	1162.79	727.842	Mean (ctrl)	915.4	687.136	228.264	Mean (ctrl)	2861.78	920.096	1941.68	Mean (ctrl)	1068.37	597.055	471.316	Mean (ctrl)	1436.11	1137.69	298.424	Mean (ctrl)	1362.51	910.528	451.984	Mean (ctrl)	1730.53	1312.75	417.778
sd (ctrl)	sd (ctrl)	16.4944	36.4084	20.5272	sd (ctrl)	7.17531	11.3891	5.37088	sd (ctrl)	7.23663	6.52359	2.12767	sd (ctrl)	6.97883	6.52207	1.1402	sd (ctrl)	62.3467	12.2347	74.513	sd (ctrl)	1.85422	3.59492	2.45638	sd (ctrl)	2.55597	9.82744	11.9632	sd (ctrl)	8.41615	8.59039	1.44113	sd (ctrl)	13.1552	16.0614	3.28227
1.960*sd	1.960*sd	32.329	71.3605	40.2333	1.960*sd	14.0636	22.3226	10.5269	1.960*sd	14.1838	12.7862	4.17024	1.960*sd	13.6785	12.7833	2.2348	1.960*sd	122.2	23.98	146.046	1.960*sd	3.63427	7.04604	4.81451	1.960*sd	5.00971	19.2618	23.4478	1.960*sd	16.4957	16.8372	2.82461	1.960*sd	25.7842	31.4804	6.43325
2.576*sd	2.576*sd	42.4896	93.7881	52.878	2.576*sd	18.4836	29.3382	13.8354	2.576*sd	18.6416	16.8048	5.48088	2.576*sd	17.9775	16.8008	2.93717	2.576*sd	160.605	31.5165	191.946	2.576*sd	4.77647	9.26051	6.32764	2.576*sd	6.58419	25.3155	30.8171	2.576*sd	21.68	22.1288	3.71235	2.576*sd	33.8878	41.3742	8.45513

## Sheet: 20 Hz (%)
Stimulation	BG-143	BG-146	BG-148	BG-150	BG-158	BG-159	BG-160	BG-162	BG-163
Time	F/F0	F/F0	F/F0	F/F0	F/F0	F/F0	F/F0	F/F0	F/F0	Mean	s,e,m,	sem+	sem-
0.224	-0.0265639	-0.00658236	0.00399377	-0.00541771	-0.082714	-0.00307463	-0.0586681	-0.00602473	-0.0146419	-0.0221882	0.0103886	-0.0117995	-0.0325768
1.462	-0.0285276	-0.00518794	-0.000277762	0.000238029	-0.0708671	-0.00781031	-0.0522912	0.00143571	-0.0127462	-0.0195594	0.00916838	-0.010391	-0.0287278
2.721	-0.0234077	-0.00663453	-0.000684443	-0.000760816	-0.0593868	-0.0057183	-0.050656	0.00403093	-0.0121286	-0.0172607	0.00810138	-0.00915932	-0.0253621
3.979	-0.0241761	-0.00264932	0.00204417	-0.000936052	-0.0488732	-0.00337168	-0.0458541	0.0010795	-0.00669275	-0.0143811	0.00716299	-0.00721807	-0.0215441
5.236	-0.0180639	-0.00332664	-0.000964724	0.00265628	-0.0370932	-0.00773393	-0.0373997	-0.00153342	-0.00864115	-0.0124556	0.00539177	-0.00706382	-0.0178474
6.492	-0.016708	-0.00158118	0.00404323	0.000527168	-0.0297897	-0.00676855	-0.0371551	-0.00513311	-0.00384674	-0.0107124	0.00503171	-0.00568072	-0.0157442
7.75	-0.0159738	-0.0013	0.00381791	0.00104411	-0.0205081	-0.0054064	-0.0291396	0.000267524	-0.00442839	-0.00795853	0.0039943	-0.00396422	-0.0119528
9.005	-0.00812272	-0.00113995	-0.000125256	0.00535054	-0.0139226	-0.00245297	-0.0316964	0.00321674	-0.00664009	-0.00617029	0.00397693	-0.00219336	-0.0101472
10.256	-0.00655953	-0.00258124	-0.00158162	0.00600329	-0.00958457	-0.0034523	-0.0249476	-6.82177e-06	0.000409109	-0.00470014	0.00310177	-0.00159837	-0.00780191
11.512	-0.00985276	-0.000807482	0.000317148	0.00470655	-0.00309122	-0.00480808	-0.0191605	-0.00192282	-0.00128557	-0.00398942	0.00244275	-0.00154666	-0.00643217
12.765	-0.00448436	-0.00142467	0.0011099	0.00840402	0.00486683	-0.00317436	-0.0132763	0.00431634	-0.00600578	-0.00107426	0.00233297	0.00125871	-0.00340723
14.018	-0.00192266	-0.00426923	0.000124798	0.00619167	0.00831436	0.00235484	-0.00746575	0.00395792	-0.000962433	0.000702614	0.00178025	0.00248287	-0.00107764
15.277	0.00535494	-0.0032559	-0.00639447	0.00615662	0.0113226	0.000506825	-0.0098047	-0.00209318	-0.000392752	0.000155551	0.00232842	0.00248397	-0.00217286
16.537	0.00720617	-0.00311266	-0.0026519	0.00466712	0.0142633	0.00100119	0.00964749	-0.00322817	0.00769288	0.00394283	0.00222781	0.00617063	0.00171502
17.798	0.000498522	-0.0014565	-0.00156513	-0.00253946	0.0173859	0.00244183	0.00805244	-0.00351137	0.00290326	0.00246772	0.00233952	0.00480724	0.000128203
19.056	0.00746261	-0.00146623	-0.00637661	0.000167934	0.0207943	-0.000363079	0.0170598	0.00129411	0.00353278	0.00467839	0.00316047	0.00783886	0.00151793
20.305	0.0153541	0.00161353	-0.00263816	-0.00445829	0.0258724	0.00410314	0.0247971	-0.00146041	0.00997639	0.00812885	0.00409507	0.0122239	0.00403379
21.562	0.0184866	0.00205652	0.00271739	-0.00736721	0.0266644	0.00549286	0.0387504	-0.0032149	0.00916495	0.0103057	0.00528688	0.0155926	0.00501879
22.82	0.0122286	0.00523266	0.00346343	-0.00601351	0.0311157	0.00768248	0.040781	-0.00147148	0.0041982	0.0108019	0.00542713	0.016229	0.00537477
24.07	0.019104	0.00591263	0.00388248	-0.00882167	0.0319187	0.00380185	0.0463168	0.00125207	0.00747985	0.0123163	0.00607713	0.0183934	0.00623917
25.321	0.018318	0.00713375	-0.00254886	0.000601643	0.0363246	0.00563714	0.04566	-0.0015644	0.0137487	0.0137012	0.00603553	0.0197367	0.00766566
26.573	0.0243231	0.00856	0.000504001	-0.00319221	0.0430163	0.0094435	0.0560513	0.000307349	0.0076474	0.0162956	0.00731576	0.0236114	0.00897987
27.83	0.0298416	0.00688263	-0.000787488	-0.00850186	0.0495333	0.00488393	0.0595463	0.00371455	0.00408091	0.0165771	0.00846981	0.0250469	0.0081073
29.091	0.0261848	0.0093841	0.000578193	0.00129383	0.0544378	0.00678499	0.0708524	0.00629207	0.00757799	0.0203762	0.008984	0.0293602	0.0113922
30.351
31.608
32.868
34.123
35.378
36.63
37.883
39.134
40.386	0.683263	0.0867848	0.648236	0.948519	0.305744	1.78122	1.28247	0.366533	1.05308	0.795095	0.187874	0.982968	0.607221
41.643	0.571582	0.0654546	0.575818	0.779455	0.280949	1.739	1.10101	0.305957	0.882133	0.700151	0.178765	0.878916	0.521386
42.901	0.491811	0.0463686	0.510413	0.648339	0.263288	1.68532	0.962507	0.255095	0.75014	0.623698	0.171743	0.79544	0.451955
44.159	0.430075	0.0303058	0.448692	0.548823	0.245962	1.63047	0.839366	0.220311	0.645847	0.559984	0.16561	0.725594	0.394374
45.414	0.373598	0.0192229	0.396807	0.47408	0.234342	1.57566	0.733963	0.194761	0.566288	0.507636	0.159973	0.667609	0.347663
46.671	0.328837	0.0105265	0.349049	0.398619	0.225091	1.52231	0.660406	0.164694	0.488948	0.460943	0.155483	0.616426	0.30546
47.929	0.290763	0.000424244	0.311636	0.346333	0.220239	1.46596	0.602107	0.148005	0.43311	0.424287	0.150573	0.574859	0.273714
49.18	0.2682	-0.00262191	0.278393	0.304386	0.21224	1.41632	0.552905	0.138514	0.388996	0.395259	0.145947	0.541206	0.249312
50.431	0.250896	-0.00137515	0.246489	0.267228	0.205119	1.36175	0.502064	0.124212	0.342301	0.366521	0.140712	0.507233	0.225809
51.681	0.229467	-0.00514815	0.23068	0.237302	0.207828	1.31325	0.468227	0.113347	0.309734	0.344965	0.136189	0.481154	0.208776
52.52	0.219937	-0.0045115	0.210636	0.214206	0.208514	1.28008	0.443513	0.106889	0.292763	0.330225	0.133061	0.463286	0.197164
58.542	0.173483	0.00582863	0.134644	0.132362	0.214101	1.0698	0.350414	0.075945	0.192571	0.261017	0.112401	0.373417	0.148616
64.565	0.159594	-0.000447602	0.090121	0.0969683	0.217068	0.902496	0.31015	0.0631392	0.146357	0.220605	0.0958688	0.316474	0.124736
70.587	0.151741	-0.00574058	0.0690683	0.0764306	0.21738	0.762732	0.291548	0.0588891	0.11194	0.192665	0.0819302	0.274596	0.110735
76.608	0.162643	-0.0289356	0.0542725	0.0543334	0.221324	0.642651	0.284907	0.0508733	0.102593	0.171629	0.0711896	0.242819	0.10044
82.632	0.16956	-0.0419417	0.0406858	0.045243	0.22952	0.533841	0.276771	0.0459948	0.157897	0.161952	0.0611696	0.223122	0.100783
88.653	0.172249	-0.0475079	0.0410485	0.0404328	0.241169	0.451181	0.293814	0.0416606	0.146451	0.153389	0.0551604	0.208549	0.0982282
94.676	0.176742	-0.0461983	0.0342132	0.0323193	0.256087	0.381048	0.29306	0.0424261	0.122845	0.143616	0.0505455	0.194161	0.0930702
100.698	0.18159	-0.0425173	0.0328022	0.0354824	0.260615	0.335138	0.292101	0.0482051	0.119185	0.140289	0.0471166	0.187406	0.0931726
106.721	0.195252	-0.045498	0.0316467	0.0274259	0.265265	0.296567	0.296173	0.0486144	0.118886	0.137148	0.0459609	0.183109	0.091187
112.743	0.204833	-0.0473345	0.0318886	0.0307641	0.281462	0.265007	0.302137	0.0484174	0.108423	0.136178	0.0457742	0.181952	0.0904033
118.765	0.210845	-0.0578683	0.0414785	0.0301552	0.282167	0.245296	0.308833	0.0437027	0.0940976	0.13319	0.0462177	0.179407	0.0869718
124.788	0.22361	-0.0695366	0.0370628	0.0405072	0.288487	0.22491	0.314187	0.0509175	0.0919338	0.133564	0.0469148	0.180479	0.0866496
130.812	0.242928	-0.0451806	0.0413755	0.0365119	0.300499	0.207014	0.308467	0.0546345	0.0860862	0.136926	0.0457683	0.182694	0.0911578
136.836	0.267667	-0.0114845	0.0438115	0.0418916	0.31589	0.196611	0.305465	0.0589621	0.086888	0.145078	0.044861	0.189939	0.100217
142.858	0.266563	0.00218385	0.0508693	0.0400954	0.323664	0.189601	0.28414	0.0552296	0.0817872	0.143792	0.0433645	0.187157	0.100428
148.88	0.274789	0.0113975	0.0533644	0.0381898	0.333571	0.180781	0.286247	0.0595993	0.0864309	0.147152	0.0436556	0.190808	0.103496
154.901	0.283995	0.00354998	0.0523188	0.0328932	0.347677	0.169841	0.293887	0.0583713	0.084875	0.14749	0.0459979	0.193488	0.101492
160.923	0.292802	0.0263763	0.063699	0.0391097	0.355819	0.171104	0.303619	0.0578868	0.0871154	0.155281	0.0457598	0.201041	0.109521
166.946	0.294694	0.037453	0.0664002	0.0349347	0.365022	0.166001	0.3097	0.06423	0.0882524	0.158521	0.0461558	0.204677	0.112365
172.97	0.314967	0.0373088	0.0715318	0.0433242	0.374452	0.167113	0.330124	0.0606745	0.0841976	0.164855	0.0485557	0.213411	0.116299
178.991	0.320407	0.0393089	0.0698693	0.0394471	0.402349	0.158252	0.314908	0.0667632	0.0885827	0.166654	0.0498562	0.21651	0.116798
185.014	0.336761	0.0417043	0.0708434	0.0443274	0.424791	0.163397	0.320135	0.0631193	0.0893511	0.172714	0.0523299	0.225044	0.120385
191.036	0.337624	0.083041	0.0695135	0.0419004	0.443293	0.163226	0.312157	0.0647698	0.090646	0.178463	0.0521171	0.23058	0.126346
197.059	0.335177	0.0958419	0.0671641	0.0444413	0.458079	0.160461	0.311795	0.0680354	0.0972548	0.182028	0.0525441	0.234572	0.129484
203.081	0.334902	0.106387	0.0607492	0.0468683	0.460019	0.161685	0.322035	0.0707766	0.0934657	0.184099	0.0529659	0.237065	0.131133
209.102	0.331368	0.112699	0.0548523	0.0505395	0.466926	0.166572	0.313149	0.0682611	0.0956295	0.184444	0.0529631	0.237407	0.131481
215.124	0.337408	0.116714	0.0469852	0.0483534	0.483413	0.165453	0.327772	0.0685022	0.0940521	0.187628	0.0555102	0.243138	0.132118
221.148	0.357063	0.132626	0.0447966	0.056848	0.505684	0.168846	0.328328	0.0693784	0.0951245	0.195411	0.0576278	0.253038	0.137783
227.17	0.356662	0.167211	0.0490434	0.0600767	0.515476	0.173	0.35407	0.0719249	0.0942125	0.204631	0.0585472	0.263178	0.146084
233.192	0.370628	0.177071	0.0498141	0.0523313	0.519339	0.17017	0.341397	0.0746197	0.0931258	0.205388	0.0591268	0.264515	0.146262
239.214	0.376553	0.178532	0.0491217	0.0545261	0.527837	0.173881	0.346929	0.082901	0.100108	0.210043	0.0596983	0.269741	0.150345
245.235	0.397354	0.161132	0.0486175	0.0630864	0.538307	0.177575	0.364964	0.0897972	0.100661	0.215722	0.0617553	0.277477	0.153966
251.258	0.403267	0.154862	0.054594	0.0643612	0.548753	0.177072	0.375553	0.0901512	0.108498	0.219679	0.0628519	0.282531	0.156827
257.28	0.404004	0.159488	0.057335	0.0692328	0.564345	0.176915	0.362639	0.0998706	0.109568	0.222599	0.0630043	0.285604	0.159595
263.304	0.413214	0.158652	0.0597036	0.0724659	0.5732	0.180456	0.37498	0.097782	0.108916	0.226597	0.0644416	0.291038	0.162155
269.328	0.416324	0.160625	0.0552576	0.0655309	0.577362	0.185521	0.375345	0.0986648	0.11564	0.227808	0.0650916	0.292899	0.162716
275.35	0.418038	0.163853	0.0524122	0.0730267	0.578082	0.187795	0.373754	0.101138	0.111083	0.228798	0.0649823	0.29378	0.163816
281.372	0.428963	0.169735	0.0549911	0.0710377	0.590911	0.18669	0.387858	0.107145	0.109752	0.23412	0.0667981	0.300918	0.167322
287.395	0.437881	0.169489	0.0535402	0.064773	0.607824	0.193632	0.401322	0.103818	0.109852	0.238015	0.0694305	0.307445	0.168584
293.417	0.438778	0.171869	0.0545336	0.0678178	0.603469	0.19115	0.408376	0.0996803	0.102059	0.237526	0.0695642	0.30709	0.167962
299.439	0.453523	0.18174	0.0603741	0.0693423	0.614296	0.200438	0.396939	0.108327	0.115918	0.244544	0.0695091	0.314053	0.175035
305.462	0.463526	0.19734	0.0595058	0.0735567	0.62481	0.201223	0.396215	0.11648	0.112718	0.249486	0.070345	0.319831	0.179141
311.484	0.464449	0.21378	0.057934	0.0769213	0.633609	0.20914	0.386075	0.120199	0.101582	0.251521	0.0707486	0.32227	0.180772
317.508	0.47545	0.224099	0.0611971	0.0800974	0.643616	0.20762	0.397277	0.12567	0.107002	0.258003	0.0717812	0.329784	0.186222
323.53	0.489072	0.230782	0.060583	0.0809561	0.647348	0.211302	0.402692	0.132489	0.111803	0.263003	0.0724636	0.335467	0.190539
329.552	0.479599	0.24932	0.0641291	0.0809123	0.652547	0.213449	0.404515	0.13344	0.109283	0.265244	0.0722848	0.337529	0.192959
335.575	0.496661	0.256807	0.0666406	0.0852099	0.657087	0.210546	0.414907	0.132602	0.114087	0.270505	0.0733789	0.343884	0.197126
341.597	0.509754	0.269651	0.0659165	0.0853589	0.663371	0.220571	0.415242	0.138268	0.109702	0.275315	0.0744037	0.349719	0.200911
	BG-143	BG-146	BG-148	BG-150	BG-158	BG-159	BG-160	BG-162	BG-163
AUC (0-5)	16.5649	2.78192	6.47326	7.337	19.3043	28.0123	21.5987	4.99212	10.4757	13.06
Max	0.683263	0.18174	0.648236	0.948519	0.614296	1.78122	1.28247	0.366533	1.05308	0.839929
Durée à mi hauteur	46.671	44.159	47.929	45.414		70.587	47.929	46.671	46.671	49.5039
Durée à mi hauteur après stim	7.537	5.025	8.795	6.28		31.453	8.795	7.537	7.537	10.3699
Nbre de PA	120	39	31	69	63
