# Supplementary material for: Elevated pyramidal cell firing orchestrates arteriolar vasoconstriction through COX-2-derived prostaglandin E2 signaling
Source: eLife. 2025 Apr 23;13:RP102424. doi: 10.7554/eLife.102424 (PMC12017770; doi:10.7554/eLife.102424)
Supplement: Figure 3—source data 1. [file elife-102424-fig3-data1.xlsx]

## Sheet: CTRL
Stimulation
Time	BGBV-075_0000	BGBV-106_0000	BGBV-117_0000	BGBV-134_0000	BGBV-253_0000	BGBV-333_0000	BGBV-334_0000	BGBV-355_0000	BGBV-407_0000	BGBV-417_0000
0	12.35	18.8499	21.0166	24.3744	16.5746			26.9743	24.0494	19.4995
1	12.5666	18.8499	21.2333	24.0494	16.5746	24.0494	21.1245	26.6493	24.3744	19.4995
2	12.7833	18.6333	21.2333	24.0494	16.5746	23.0744	21.1245	26.9743	24.0494	19.4995
3	12.7833	19.0666	21.2333	24.0494	16.2496	23.0744	21.1245	27.2993	24.0494	19.4995
4	12.7833	19.0666	21.2333	24.0494	16.2496	23.3994	21.1245	27.2993	24.3744	19.4995
5	12.7833	18.8499	21.4499	24.0494	16.2496	23.3994	21.1245	26.6493	24.3744	19.4995
6	12.5666	18.6333	21.2333	24.0494	16.2496	22.7494	21.7745	26.6493	24.0494	19.4995
7	12.7833	18.8499	21.4499	24.0494	16.5746	23.0744	21.4495	26.6493	24.3744	19.4995
8	12.5666	18.8499	21.2333	24.0494	16.2496	22.7494	21.1245	26.9743	24.0494	19.4995
9	12.5666	18.8499	21.4499	24.0494	15.9246	23.0744	21.4495	26.6493	24.0494	19.1745
10	12.7833	18.6333	21.2333	24.0494	16.2496	23.0744	21.4495	27.2993	24.3744	19.1745
11	12.35	18.8499	21.2333	24.0494	16.2496	23.3994	21.1245	26.6493	24.0494	19.4995
12	12.5666	18.8499	21.2333	24.0494	16.2496	23.0744	21.1245	26.9743	24.3744	19.1745
13	12.5666	19.0666	21.4499	24.0494	16.2496	23.0744	20.7995	26.9743	24.0494	19.1745
14	12.5666	18.8499	21.2333	24.0494	15.9246	23.0744	21.4495	26.6493	24.0494	19.4995
15	12.5666	19.0666	21.2333	24.0494	16.2496	22.7494	21.7745	26.6493	24.0494	19.4995
16	12.7833	18.8499	21.2333	23.7244	16.5746	23.0744	21.7745	26.6493	24.3744	19.1745
17	12.35	18.8499	21.2333	24.0494	16.5746	22.7494	21.4495	26.6493	23.7244	19.4995
18	12.5666	18.6333	21.2333	24.0494	16.5746	22.7494	21.1245	27.2993	23.3994	19.4995
19	12.5666	18.6333	21.2333	24.0494	16.5746	23.3994	21.4495	26.6493	24.0494	19.8245
20	12.7833	19.0666	21.4499	24.0494	16.5746	22.7494	22.0994	26.6493	23.7244	19.1745
21	12.5666	18.6333	21.2333	24.0494	15.9246	23.0744	21.4495	26.9743	24.0494	19.4995
22	12.35	18.6333	21.2333	24.0494	16.2496	23.3994	21.4495	26.9743	24.0494	19.4995
23	12.7833	18.8499	21.4499	24.0494	16.2496	23.0744	21.4495	26.3243	24.3744	19.4995
24	12.5666	18.8499	21.2333	24.0494	16.2496	22.7494	21.7745	27.2993	23.7244	19.4995
25	12.5666	18.6333	21.4499	24.0494	16.2496	23.0744	21.4495	27.2993	24.3744	19.4995
26	12.35	18.6333	21.4499	24.0494	16.5746	23.0744	21.4495	26.6493	24.0494	19.4995
27	12.7833	18.6333	21.2333	24.3744	16.2496	23.0744	21.1245	27.2993	23.7244	19.4995
28	12.35	18.6333	21.2333	24.0494	16.2496	23.0744	21.4495	26.6493	23.7244	19.4995
29	12.35	18.8499	21.4499	24.0494	15.9246	23.0744	21.4495	26.9743	24.0494	19.4995
30	12.7833	18.8499	21.2333	24.0494	16.2496	22.7494	21.1245	26.9743	24.0494	19.4995
31					16.2496			26.9743	23.7244	19.4995
32					15.9246			26.9743	23.7244	19.4995
33					16.2496			27.2993	23.7244	19.1745
34					16.2496			26.9743	23.7244	19.4995
35					16.2496			26.9743	24.3744	19.4995
36					16.5746			27.2993	23.7244	19.4995
37					16.5746			27.2993	23.7244	19.4995
38					16.8996			27.2993	23.7244	19.4995
39					16.5746			27.2993	23.7244	19.4995
40					16.8996			27.2993	24.0494	19.4995
41	12.7833	18.6333	21.2333	24.0494	16.5746	23.3994	21.7745	26.9743	24.0494	19.4995
42	12.35	18.8499	21.4499	24.0494	16.5746	22.7494	20.4745	26.9743	23.3994	19.8245
43	12.5666	18.8499	21.2333	24.0494	16.5746	22.7494	21.1245	26.9743	24.0494	19.1745
44	12.1333	18.8499	21.2333	24.0494	16.8996	22.7494	21.7745	26.6493	23.7244	19.8245
45	12.35	18.6333	21.2333	24.0494	16.8996	23.0744	21.4495	27.2993	23.7244	19.8245
46	12.5666	18.8499	21.2333	24.0494	16.8996	22.7494	20.7995	27.2993	23.7244	19.4995
47	12.5666	18.8499	21.2333	24.0494	16.5746	23.3994	21.4495	26.9743	23.7244	19.8245
48	12.7833	18.6333	21.2333	24.0494	16.5746	23.0744	21.1245	27.2993	23.7244	19.4995
49	12.5666	18.6333	21.2333	24.0494	16.8996	22.7494	20.7995	26.9743	23.7244	19.4995
50	12.5666	18.6333	21.2333	24.0494	16.5746	23.0744	21.1245	26.9743	24.0494	19.8245
51	12.35	18.6333	21.2333	24.0494	16.5746	23.3994	21.1245	27.2993	24.0494	19.8245
52	12.5666	18.6333	21.2333	24.0494	16.8996	22.7494	21.4495	27.2993	23.7244	19.8245
53	12.5666	18.6333	21.2333	24.0494	16.2496	23.0744	21.1245	27.2993	24.0494	19.8245
54	12.35	18.8499	21.2333	24.0494	16.5746	23.0744	21.1245	27.2993	23.7244	19.4995
55	12.5666	18.8499	21.2333	24.0494	16.5746	23.3994	21.4495	27.2993	23.7244	19.8245
56	12.5666	18.8499	21.2333	24.0494	16.5746	23.0744	21.1245	26.9743	23.7244	19.8245
57	12.5666	18.8499	21.2333	24.0494	16.5746	23.0744	21.4495	27.2993	23.7244	20.1495
58	12.35	18.8499	21.2333	24.0494	16.2496	23.3994	21.4495	27.2993	23.7244	19.8245
59	12.1333	18.8499	21.0166	24.0494	15.9246	23.3994	21.4495	26.9743	23.7244	19.4995
60	12.5666	18.8499	21.2333	24.0494	16.2496	23.7244	21.4495	26.6493	24.0494	19.4995
61	12.35	18.6333	21.0166	24.3744	15.9246	23.3994	21.1245	27.2993	23.7244	19.8245
62	12.35	18.8499	21.0166	24.0494	16.2496	23.0744	21.1245	26.9743	23.7244	18.8495
63	12.35	18.6333	21.2333	23.7244	16.2496	23.3994	21.4495	26.6493	24.0494	20.1495
64	12.35	18.8499	20.7999	24.0494	16.2496	23.3994	21.4495	26.9743	23.7244	19.4995
65	12.35	18.8499	21.2333	23.7244	16.2496	23.3994	21.1245	26.6493	24.0494	19.4995
66	12.1333	18.8499	21.0166	23.7244	16.2496	23.3994	21.1245	26.6493	24.0494	19.4995
67	11.9166	18.8499	20.7999	23.7244	16.2496	23.0744	20.7995	26.3243	23.7244	19.4995
68	12.1333	18.6333	20.7999	23.7244	16.2496	23.0744	21.4495	26.6493	23.7244	19.4995
69	12.35	18.8499	20.5833	23.7244	16.2496	22.4244	21.4495	26.3243	23.7244	19.4995
70	11.9166	18.6333	20.7999	23.7244	16.2496	22.0994	21.1245	25.9994	23.7244	19.1745
71	12.1333	18.8499	20.7999	23.7244	15.9246	22.4244	21.4495	25.9994	23.7244	18.8495
72	12.35	18.6333	20.7999	23.7244	15.9246	23.0744	21.4495	26.3243	24.0494	19.1745
73	11.9166	19.0666	20.7999	23.7244	16.2496	23.0744	21.4495	25.9994	23.7244	19.4995
74	12.35	18.8499	20.7999	23.3994	15.9246	23.0744	21.4495	25.9994	23.7244	19.1745
75	11.7	18.8499	20.3666	23.7244	15.9246	23.3994	21.1245	25.9994	24.0494	18.8495
76	11.9166	18.8499	20.3666	23.0744	16.2496	23.7244	21.4495	25.9994	23.7244	19.1745
77	12.35	18.6333	20.3666	23.3994	16.5746	23.3994	21.1245	26.3243	23.7244	18.8495
78	11.9166	18.8499	20.3666	23.3994	16.2496	23.0744	21.1245	25.3494	24.0494	18.8495
79	11.9166	18.4166	20.5833	23.0744	15.9246	23.0744	21.1245	25.3494	24.0494	18.8495
80	11.7	18.6333	20.3666	23.0744	15.9246	23.0744	21.1245	25.3494	24.0494	18.5245
81	11.7	18.6333	20.3666	23.0744	16.2496	23.0744	21.1245	25.0244	23.7244	18.5245
82	12.1333	18.6333	19.9333	23.0744	16.2496	22.7494	21.4495	25.0244	24.0494	18.5245
83	11.9166	18.6333	20.1499	23.0744	16.2496	23.0744	21.1245	25.0244	24.0494	19.1745
84	11.7	18.6333	20.3666	23.0744	16.5746	22.7494	20.7995	25.3494	23.3994	18.8495
85	11.7	18.6333	20.1499	23.0744	16.2496	22.7494	21.4495	25.3494	23.7244	18.5245
86	11.7	18.6333	20.1499	23.0744	16.2496	22.7494	20.1495	24.6994	23.7244	18.8495
87	11.9166	18.6333	19.9333	23.0744	16.2496	22.7494	20.4745	24.6994	24.0494	18.8495
88	11.4833	18.4166	19.9333	23.0744	16.2496	22.7494	20.7995	25.0244	24.0494	18.1995
89	11.7	18.4166	20.1499	22.7494	16.2496	23.3994	21.1245	24.6994	23.7244	17.8746
90	11.9166	18.6333	19.7166	23.0744	16.2496	22.7494	20.4745	24.0494	24.0494	18.5245
91	11.4833	18.6333	19.7166	22.7494	16.8996	23.3994	20.7995	25.0244	23.7244	18.5245
92	11.9166	18.6333	20.1499	22.7494	16.8996	22.7494	21.1245	24.3744	23.7244	17.8746
93	11.4833	18.1999	19.9333	22.7494	16.8996	22.7494	21.1245	24.3744	23.3994	18.1995
94	11.7	18.4166	19.7166	22.7494	16.5746	23.0744	21.1245	24.6994	23.7244	18.1995
95	11.4833	18.6333	19.7166	22.7494	16.5746	23.0744	20.7995	24.3744	23.7244	18.1995
96	11.7	18.4166	19.4999	22.4244	16.5746	23.3994	20.4745	24.0494	23.7244	18.1995
97	11.2666	18.6333	19.9333	22.4244	16.5746	22.7494	21.1245	23.7244	23.7244	18.8495
98	11.7	18.1999	19.7166	22.4244	16.5746	23.0744	20.7995	24.0494	23.7244	18.1995
99	11.2666	18.4166	19.9333	22.4244	16.5746	23.0744	21.1245	24.3744	23.7244	18.1995
100	11.2666	18.4166	19.2833	22.4244	16.5746	22.7494	20.4745	23.3994	23.3994	18.1995
101	11.7	18.1999	19.4999	22.4244	16.5746	22.7494	20.7995	23.7244	23.3994	18.1995
102	11.2666	18.4166	19.7166	22.4244	16.2496	23.0744	20.1495	23.7244	23.3994	18.1995
103	11.2666	18.4166	19.2833	22.4244	16.5746	23.0744	20.7995	23.3994	23.3994	17.8746
104	11.9166	18.4166	19.2833	22.4244	16.5746	23.0744	20.7995	24.3744	23.3994	18.1995
105	11.4833	18.4166	19.4999	22.4244	16.2496	23.3994	20.7995	24.0494	23.3994	17.8746
106	11.7	18.4166	19.2833	22.4244	16.2496	23.0744	20.4745	23.7244	23.0744	17.8746
107	11.4833	18.1999	19.2833	22.4244	15.9246	23.0744	20.1495	23.7244	23.0744	17.8746
108	11.7	18.4166	19.4999	22.4244	16.2496	23.0744	20.4745	23.7244	23.7244	17.8746
109	11.4833	18.1999	19.0666	22.4244	15.9246	23.0744	20.7995	23.7244	22.7494	18.1995
110	11.4833	18.4166	19.2833	22.4244	15.9246	23.3994	20.1495	23.7244	23.3994	17.8746
111	11.4833	18.4166	19.0666	22.4244	16.5746	22.7494	20.1495	23.7244	23.0744	18.1995
112	11.7	18.4166	18.8499	22.4244	15.9246	22.4244	20.7995	23.3994	23.3994	18.1995
113	11.4833	18.4166	19.0666	22.4244	15.9246	22.4244	21.1245	23.0744	22.7494	17.8746
114	11.7	18.4166	19.2833	22.0994	16.2496	23.0744	20.1495	23.7244	23.0744	17.8746
115	11.7	18.4166	18.8499	22.4244	15.9246	23.0744	20.4745	23.3994	22.4244	18.1995
116	11.4833	18.1999	18.8499	22.0994	16.2496	23.0744	20.4745	23.0744	22.4244	17.5496
117	11.9166	18.4166	19.0666	22.0994	16.8996	23.0744	20.4745	23.0744	22.4244	17.8746
118	11.9166	18.4166	19.0666	22.0994	16.5746	23.3994	20.1495	22.7494	23.0744	18.1995
119	11.7	18.4166	18.8499	21.7745	16.5746	22.4244	20.1495	22.7494	22.4244	17.8746
120	11.7	18.4166	18.8499	22.0994	15.9246	23.0744	20.4745	22.7494	22.4244	18.1995
121	11.7	18.6333	18.6333	22.0994	16.2496	22.7494	19.8245	22.7494	22.0994	17.8746
122	11.9166	18.1999	18.8499	21.7745	16.5746	22.7494	20.1495	23.0744	22.4244	17.8746
123	11.7	18.1999	19.0666	21.7745	16.5746	23.3994	20.4745	23.3994	22.4244	17.8746
124	11.4833	18.1999	19.0666	22.0994	16.5746	23.3994	20.1495	23.0744	22.4244	17.8746
125	11.4833	18.1999	18.6333	21.7745	16.5746	22.7494	20.4745	23.0744	21.7745	17.8746
126	11.7	18.1999	18.6333	22.0994	16.5746	22.7494	20.1495	23.0744	22.0994	17.8746
127	11.2666	18.1999	18.6333	22.0994	16.5746	22.7494	20.1495	23.0744	22.4244	17.8746
128	11.9166	18.1999	18.6333	22.0994	15.9246	23.0744	20.1495	23.0744	22.0994	17.8746
129	11.4833	18.4166	18.8499	22.0994	16.5746	22.7494	20.1495	22.7494	22.7494	17.5496
130	11.7	18.4166	18.6333	22.4244	16.5746	23.0744	20.1495	22.7494	22.4244	17.8746
131	11.4833	17.7666	18.8499	22.4244	16.2496	23.3994	20.1495	22.7494	21.7745	17.8746
132	11.9166	17.7666	19.0666	21.7745	16.5746	22.7494	19.8245	22.7494	22.0994	17.8746
133	11.4833	17.3333	18.4166	21.7745	16.5746	22.7494	20.7995	23.3994	21.7745	17.8746
134	11.4833	17.5499	18.6333	21.4495	16.5746	23.3994	20.1495	22.7494	21.7745	17.8746
135	11.9166	17.5499	18.8499	21.4495	16.5746	22.7494	20.1495	23.0744	22.0994	17.8746
136	11.7	17.5499	18.6333	21.4495	16.8996	23.0744	20.1495	23.0744	21.4495	18.1995
137	11.4833	17.3333	19.0666	21.4495	15.9246	23.0744	19.8245	22.4244	21.7745	18.1995
138	11.9166	17.3333	18.6333	21.4495	16.2496	23.3994	20.1495	23.0744	22.4244	18.1995
139	11.7	17.5499	18.8499	21.4495	16.5746	22.7494	19.4995	23.0744	22.0994	17.8746
140	11.9166	17.3333	18.6333	21.4495	16.5746	22.7494	20.4745	23.0744	21.4495	17.8746
141	11.7	17.3333	18.4166	21.4495	16.8996	23.3994	19.8245	22.4244	21.7745	18.5245
142	11.2666	17.3333	18.6333	21.1245	16.5746	22.7494	19.4995	23.3994	21.7745	18.1995
143	11.7	17.5499	19.0666	21.4495	16.8996	22.7494	19.8245	23.0744	21.4495	18.1995
144	11.9166	17.3333	18.8499	21.4495	16.2496	22.7494	19.8245	23.0744	21.7745	18.5245
145	11.7	17.3333	18.8499	21.4495	16.2496	22.4244	20.4745	22.7494	22.0994	18.5245
146	11.7	17.3333	19.0666	21.1245	16.8996	22.0994	20.1495	22.4244	21.4495	18.5245
147	11.7	17.3333	18.8499	21.4495	16.5746	22.7494	19.1745	22.7494	21.7745	17.8746
148	11.4833	17.1166	18.8499	21.4495	16.5746	22.4244	19.4995	22.4244	21.4495	17.8746
149	11.9166	17.3333	18.6333	21.1245	16.8996	22.7494	19.8245	22.4244	21.4495	18.1995
150	11.9166	17.1166	18.8499	21.1245	16.8996	22.7494	19.8245	22.7494	22.0994	17.8746
151	11.7	17.3333	18.6333	21.1245	16.5746	22.4244	19.4995	22.7494	20.7995	18.1995
152	11.9166	17.3333	18.6333	21.1245	16.2496	23.0744	19.4995	22.7494	21.4495	17.8746
153	11.7	17.5499	18.8499	21.1245	16.2496	23.0744	19.4995	23.0744	21.4495	17.8746
154	11.9166	17.5499	18.6333	21.1245	16.8996	23.0744	19.4995	23.0744	20.7995	17.8746
155	11.4833	17.1166	18.8499	21.1245	16.5746	23.3994	20.1495	23.0744	20.7995	17.8746
156	12.1333	17.5499	18.6333	21.1245	16.5746	23.0744	19.4995	23.0744	20.4745	18.1995
157	11.9166	17.3333	18.4166	21.1245	16.2496	22.7494	18.8495	23.3994	20.7995	17.8746
158	12.35	17.5499	18.6333	21.1245	16.8996	22.7494	19.1745	23.0744	20.7995	17.5496
159	11.7	17.5499	18.4166	21.1245	16.2496	23.3994	19.4995	23.0744	20.7995	17.8746
160	11.9166	17.5499	18.6333	21.1245	16.8996	23.3994	19.4995	23.0744	21.1245	17.8746
161	11.4833	17.5499	18.6333	21.1245	16.2496	22.7494	19.8245	23.3994	21.1245	17.5496
162	11.7	17.7666	18.6333	21.1245	16.2496	23.3994	19.8245	23.0744	20.4745	17.8746
163	11.9166	17.7666	18.6333	21.1245	15.9246	23.0744	19.1745	23.0744	20.1495	17.5496
164	12.1333	17.5499	18.6333	21.1245	16.2496	23.0744	19.8245	23.3994	20.7995	18.1995
165	11.9166	17.7666	18.4166	21.1245	16.2496	23.3994	18.8495	23.0744	20.7995	17.5496
166	11.7	17.7666	18.1999	21.1245	15.5996	23.0744	19.8245	23.0744	20.7995	17.5496
167	11.9166	17.7666	18.1999	21.1245	15.9246	23.0744	18.8495	23.3994	20.1495	17.8746
168	12.1333	18.1999	18.4166	21.1245	15.9246	23.0744	19.4995	23.3994	20.4745	17.5496
169	11.7	17.7666	18.4166	21.1245	15.9246	23.3994	19.1745	23.3994	20.1495	17.8746
170	12.1333	17.9833	18.1999	21.1245	15.5996	22.7494	19.1745	23.0744	20.1495	18.1995
171	11.9166	17.7666	18.8499	21.1245	15.9246	22.4244	19.4995	23.3994	20.1495	17.8746
172	11.7	17.7666	18.1999	20.7995	15.5996	23.0744	19.1745	23.7244	20.4745	18.1995
173	11.4833	17.7666	19.0666	21.1245	15.9246	23.0744	19.4995	23.7244	20.4745	18.8495
174	11.7	17.7666	18.8499	21.1245	15.5996	22.7494	19.4995	23.7244	20.1495	18.5245
175	11.4833	17.7666	19.0666	21.1245	15.5996	23.3994	19.1745	23.3994	20.1495	18.1995
176	11.4833	17.7666	18.6333	20.7995	15.5996	23.0744	18.8495	24.0494	19.8245	17.8746
177	12.1333	17.7666	18.6333	21.1245	15.2746	22.4244	19.1745	23.7244	20.7995	18.1995
178	11.7	17.7666	18.8499	21.1245	15.5996	23.0744	19.4995	23.7244	20.7995	17.8746
179	11.7	17.5499	18.4166	21.1245	15.5996	22.7494	20.1495	23.3994	20.4745	18.1995
180	11.7	17.5499	18.4166	21.1245	15.5996	23.0744	18.5245	23.7244	20.4745	17.8746
181	11.7	17.5499	18.6333	21.1245	14.9496	22.7494	18.8495	23.7244	21.1245	18.1995
182	11.9166	17.5499	18.8499	21.1245	15.2746	22.4244	19.1745	23.7244	21.1245	18.5245
183	11.9166	17.5499	18.8499	21.1245	15.9246	22.7494	19.4995	24.0494	21.1245	18.1995
184	11.7	17.5499	18.4166	21.1245	15.9246	22.4244	19.1745	23.7244	20.1495	18.1995
185	11.9166	17.3333	18.6333	21.1245	15.5996	22.7494	18.8495	24.0494	21.4495	18.5245
186	11.9166	17.5499	18.6333	21.1245	15.9246	22.4244	18.8495	24.0494	20.7995	18.5245
187	11.7	17.3333	18.8499	21.1245	15.5996	22.4244	18.8495	23.7244	20.4745	18.1995
188	11.7	17.5499	18.6333	21.1245	15.2746	23.3994	19.8245	23.7244	21.1245	17.8746
189	11.7	17.7666	18.8499	21.1245	15.5996	22.7494	19.1745	23.7244	21.4495	17.8746
190	11.7	17.5499	18.6333	21.1245	15.9246	23.0744	19.4995	24.0494	20.4745	18.1995
191	11.7	17.5499	18.6333	21.1245	15.5996	22.7494	19.1745	24.0494	20.7995	17.8746
192	11.7	17.7666	18.6333	21.1245	15.9246	22.7494	18.8495	24.0494	20.4745	17.8746
193	11.7	17.7666	18.8499	21.1245	15.5996	22.7494	19.1745	23.7244	20.7995	18.5245
194	11.4833	17.5499	18.6333	21.4495	15.5996	22.7494	19.4995	24.3744	21.1245	17.8746
195	12.1333	17.5499	18.8499	21.4495	15.5996	22.7494	19.4995	24.0494	20.7995	18.5245
196	11.7	17.7666	18.8499	21.1245	15.5996	23.0744	18.8495	24.3744	21.1245	18.1995
197	11.7	17.7666	18.6333	21.1245	15.9246	22.7494	18.8495	24.3744	20.4745	18.8495
198	11.7	17.7666	18.8499	21.1245	14.2996	23.0744	18.8495	24.3744	20.4745	18.8495
199	11.9166	17.9833	18.6333	21.1245	15.2746	22.7494	19.1745	24.0494	20.7995	18.5245
200	11.7	17.9833	18.6333	21.4495	15.9246	23.3994	19.1745	24.0494	21.1245	18.8495
201	11.7	17.7666	18.4166	21.4495	15.5996	23.0744	19.4995	24.3744	20.7995	18.8495
202	11.7	17.9833	18.8499	21.4495	15.5996	23.0744	18.8495	23.7244	20.7995	18.8495
203	11.9166	17.7666	18.6333	21.4495	15.9246	22.7494	18.8495	24.3744	20.7995	18.8495
204	11.7	17.5499	18.6333	21.4495	15.9246	23.0744	18.8495	24.0494	20.7995	18.5245
205	11.4833	17.5499	19.0666	21.4495	15.2746	22.7494	19.1745	24.0494	20.4745	18.5245
206	11.7	17.5499	18.8499	21.4495	15.9246	23.3994	19.1745	24.3744	20.7995	18.8495
207	11.9166	17.5499	18.8499	21.4495	15.5996	23.0744	18.8495	24.0494	21.4495	18.5245
208	11.9166	17.5499	18.4166	21.7745	14.9496	22.7494	19.1745	24.3744	20.1495	18.5245
209	12.1333	17.7666	18.8499	21.4495	15.2746	22.4244	18.8495	24.3744	20.4745	18.8495
210	11.7	17.5499	18.8499	21.4495	14.9496	23.0744	18.8495	24.3744	20.4745	18.5245
211	12.1333	17.5499	18.8499	21.4495	15.2746	22.7494	18.8495	24.0494	20.4745	19.1745
212	11.9166	17.7666	19.0666	21.4495	15.2746	22.7494	19.1745	24.3744	20.4745	19.1745
213	11.7	17.5499	19.0666	21.4495	15.2746	23.0744	18.8495	24.3744	20.1495	18.8495
214	11.9166	17.5499	18.8499	21.7745	15.2746	23.0744	19.1745	24.3744	20.1495	19.1745
215	11.9166	17.5499	18.8499	21.7745	15.2746	22.7494	18.8495	24.6994	21.1245	19.1745
216	11.7	17.5499	18.8499	21.4495	15.5996	22.4244	19.1745	24.3744	20.7995	18.8495
217	11.7	17.3333	18.8499	21.4495	15.2746	22.4244	18.8495	24.0494	20.7995	18.5245
218	11.9166	17.3333	18.8499	21.7745	15.2746	22.7494	18.8495	24.6994	21.4495	18.5245
219	11.9166	17.5499	18.8499	21.4495	14.9496	23.0744	18.5245	24.3744	21.1245	19.1745
220	11.7	17.5499	18.8499	21.7745	15.2746	22.7494	19.1745	24.3744	20.4745	19.1745
221	11.9166	17.3333	18.8499	21.7745	15.5996	23.3994	18.8495	24.6994	19.8245	19.1745
222	11.9166	17.3333	19.0666	21.7745	15.9246	22.7494	18.8495	24.6994	20.1495	19.1745
223	11.7	17.3333	18.8499	21.7745	15.5996	22.7494	18.8495	24.3744	20.4745	18.8495
224	11.9166	17.3333	19.0666	21.4495	15.5996	23.0744	18.8495	24.6994	19.8245	18.8495
225	11.9166	17.5499	19.0666	21.4495	15.5996	22.7494	18.5245	24.6994	20.1495	18.8495
226	11.9166	17.3333	19.0666	21.4495	15.5996	22.7494	18.1995	24.3744	20.7995	19.1745
227	11.9166	17.5499	18.8499	21.7745	15.9246	23.0744	17.8746	24.6994	20.4745	18.5245
228	11.9166	17.1166	18.8499	21.7745	15.5996	22.4244	18.1995	24.3744	19.8245	18.8495
229	11.9166	17.3333	19.0666	21.7745	15.5996	23.0744	18.5245	24.6994	20.4745	18.8495
230	11.9166	17.3333	18.8499	21.7745	15.5996	23.0744	18.5245	24.6994	20.4745	19.1745
231	11.9166	17.3333	18.8499	21.7745	15.9246	23.0744	17.8746	24.6994	19.8245	18.5245
232	11.4833	17.5499	19.0666	21.4495	15.2746	22.0994	18.5245	24.3744	20.4745	19.1745
233	11.9166	17.5499	18.8499	21.7745	15.9246	22.0994	18.8495	24.6994	20.1495	18.8495
234	11.9166	17.3333	18.8499	21.4495	15.5996	23.0744	18.5245	25.0244	20.1495	19.1745
235	11.7	17.3333	19.0666	21.7745	15.9246	22.4244	17.8746	25.0244	20.7995	18.8495
236	11.7	17.3333	19.0666	21.4495	15.5996	22.4244	18.5245	24.0494	20.7995	18.5245
237	11.9166	17.3333	18.8499	21.4495	15.5996	22.4244	18.1995	25.0244	20.7995	18.5245
238	11.7	17.5499	19.2833	22.0994	15.5996	23.0744	18.8495	24.6994	20.1495	18.1995
239	11.7	17.5499	19.2833	21.7745	15.9246	22.4244	18.5245	24.6994	20.1495	18.5245
240	11.7	17.5499	19.2833	21.4495	15.9246	23.0744	18.1995	25.0244	20.4745	18.8495
241	11.7	17.5499	19.2833	21.4495	16.2496	22.7494	18.1995	25.0244	21.4495	18.5245
242	11.9166	17.3333	19.4999	21.7745	16.2496	22.7494	18.5245	25.3494	20.1495	18.8495
243	11.9166	17.3333	19.2833	21.7745	15.9246	22.7494	18.5245	24.6994	20.4745	18.5245
244	11.7	17.5499	19.2833	21.7745	15.9246	22.4244	18.1995	25.0244	20.4745	18.5245
245	11.7	17.5499	19.0666	21.7745	16.2496	23.3994	18.1995	25.0244	20.7995	18.8495
246	11.7	17.5499	19.0666	21.4495	15.9246	22.7494	18.1995	24.6994	20.7995	18.5245
247	11.4833	17.3333	19.2833	21.7745	16.2496	22.7494	18.5245	25.0244	20.1495	18.5245
248	11.7	17.1166	19.2833	21.4495	15.9246	22.7494	18.1995	25.0244	20.4745	18.5245
249	11.7	17.3333	19.2833	21.7745	15.9246	22.7494	18.5245	24.6994	21.1245	18.8495
250	11.7	17.3333	19.4999	21.4495	15.9246	22.4244	18.5245	25.3494	20.7995	18.5245
251	11.7	17.3333	19.2833	21.4495	15.9246	22.4244	18.1995	24.6994	20.4745	18.5245
252	11.4833	17.3333	19.0666	22.0994	15.9246	23.0744	18.5245	25.0244	20.7995	18.5245
253	11.7	17.3333	19.2833	21.7745	15.9246	23.0744	18.1995	25.6744	19.8245	18.5245
254	11.9166	17.5499	19.0666	21.7745	15.9246	22.7494	18.5245	25.3494	20.4745	19.1745
255	11.7	17.3333	19.2833	21.7745	15.9246	23.0744	18.5245	25.0244	20.1495	18.8495
256	11.4833	17.3333	19.2833	21.4495	15.9246	22.7494	18.8495	25.0244	20.7995	19.1745
257	11.7	17.3333	19.4999	21.7745	15.9246	22.7494	18.1995	24.6994	20.7995	18.1995
258	11.4833	17.5499	19.4999	21.7745	15.5996	22.0994	18.5245	25.0244	21.1245	18.5245
259	11.7	17.3333	19.4999	22.0994	15.9246	22.4244	18.5245	25.3494	21.1245	19.1745
260	11.4833	17.3333	19.2833	21.4495	15.9246	22.7494	18.1995	25.0244	21.1245	18.5245
261	11.7	17.5499	19.4999	22.0994	15.9246	22.0994	18.1995	25.0244	20.4745	18.8495
262	11.7	17.3333	19.4999	21.7745	16.2496	22.0994	18.8495	25.3494	21.1245	19.1745
263	11.7	17.5499	19.4999	22.0994	15.9246	22.7494	18.5245	25.0244	20.4745	18.8495
264	11.4833	17.5499	19.2833	21.7745	15.5996	23.0744	18.5245	25.0244	20.4745	18.5245
265	11.7	17.3333	19.4999	22.0994	15.9246	23.0744	18.1995	25.0244	20.7995	18.8495
266	11.2666	17.3333	19.4999	21.7745	15.9246	22.7494	18.5245	25.3494	20.7995	18.5245
267	11.7	17.3333	19.4999	22.0994	15.9246	22.4244	17.8746	24.6994	20.4745	18.8495
268	11.7	17.3333	19.4999	22.0994	15.9246	22.4244	18.5245	25.3494	20.4745	18.5245
269	11.2666	17.3333	19.4999	22.0994	15.9246	22.7494	18.1995	25.3494	20.4745	18.5245
270	11.4833	17.1166	19.2833	22.0994	15.9246	22.7494	18.5245	25.0244	20.1495	18.8495
271	11.4833	17.5499	19.2833	21.7745	16.2496	22.4244	17.5496	25.0244	20.4745	18.8495
272	11.4833	17.3333	19.4999	22.0994	15.5996	22.7494	18.5245	24.6994	20.7995	18.8495
273	11.9166	17.3333	19.2833	22.0994	15.9246	22.4244	18.5245	25.3494	20.4745	18.5245
274	11.4833	17.1166	19.4999	22.0994	15.9246	23.0744	18.1995	25.3494	20.4745	18.8495
275	11.7	17.3333	19.2833	22.0994	15.9246	22.7494	18.1995	25.0244	20.1495	18.5245
276	11.9166	17.3333	19.2833	22.0994	15.9246	22.7494	18.5245	25.3494	19.8245	18.5245
277	11.7	17.3333	19.2833	21.7745	15.9246	22.7494	18.5245	25.3494	20.1495	18.8495
278	11.7	17.1166	19.4999	21.7745	16.2496	23.0744	18.1995	25.0244	20.1495	18.8495
279	11.4833	17.3333	19.4999	21.4495	15.9246	22.4244	18.8495	24.6994	19.8245	18.5245
280	11.4833	17.1166	19.4999	21.7745	15.9246	23.0744	18.5245	25.3494	20.1495	18.8495
281	11.9166	17.1166	19.4999	21.7745	16.2496	22.4244	18.8495	25.3494	20.1495	18.8495
282	11.4833	17.3333	19.2833	22.0994	15.9246	22.0994	18.1995	25.3494	19.8245	18.5245
283	11.2666	17.1166	19.4999	22.0994	15.9246	22.4244	18.5245	25.3494	20.1495	18.8495
284	11.2666	17.3333	19.4999	22.0994	15.2746	22.7494	18.8495	25.6744	20.1495	18.8495
285	11.4833	17.1166	19.2833	21.7745	15.9246	22.7494	18.5245	25.6744	19.1745	18.5245
286	11.4833	17.1166	19.2833	22.0994	15.5996	22.7494	18.1995	25.3494	19.4995	18.5245
287	11.9166	17.3333	19.2833	22.0994	15.2746	22.7494	18.5245	25.6744	19.4995	18.8495
288	11.4833	17.1166	19.2833	21.7745	16.2496	22.4244	18.5245	25.0244	20.1495	18.8495
289	11.7	17.3333	19.2833	22.0994	15.5996	22.7494	18.5245	24.6994	19.4995	18.8495
290	11.7	17.3333	19.2833	21.7745	15.5996	22.4244	18.5245	25.3494	20.7995	18.8495
291	11.4833	17.1166	19.4999	22.0994	15.9246	22.4244	18.5245	25.9994	20.1495	18.8495
292	11.4833	17.1166	19.2833	21.7745	15.9246	22.4244	18.5245	25.3494	20.1495	18.5245
293	11.9166	17.1166	19.2833	22.0994	15.9246	22.7494	18.5245	25.3494	19.8245	18.8495
294	11.4833	17.3333	19.2833	21.7745	16.2496	22.7494	18.1995	25.0244	20.4745	18.5245
295	11.7	17.1166	19.2833	22.0994	15.5996	22.4244	18.1995	25.3494	20.7995	18.5245
296	11.2666	17.1166	19.2833	21.7745	15.9246	22.7494	18.5245	25.6744	20.4745	18.1995
297	11.9166	17.1166	19.4999	21.7745	15.9246	22.7494	18.5245	25.3494	20.4745	18.1995
298	11.7	17.1166	19.2833	21.7745	15.9246	23.0744	18.5245	25.3494	20.7995	18.5245
299	11.2666	17.1166	19.2833	22.0994	15.5996	22.7494	18.5245	25.0244	20.4745	18.1995
300	11.05	17.1166	19.2833	22.0994	15.5996	22.4244	18.1995	25.6744	21.1245	18.5245
301	11.7	17.1166	19.4999	21.7745	15.9246	23.0744	17.8746	25.0244	20.4745	18.5245
302	11.4833	17.3333	19.2833	22.0994	15.5996	23.0744	18.5245	25.3494	20.7995	18.5245
303	11.4833	17.1166	19.4999	22.0994	15.5996	23.0744	18.5245	25.6744	20.7995	18.8495
304	11.4833	17.1166	19.7166	22.0994	15.9246	23.3994	18.5245	25.6744	20.7995	18.8495
305	11.2666	17.3333	19.7166	22.0994	15.9246	23.0744	18.1995	25.6744	21.1245	18.8495
306	11.7	17.1166	19.4999	21.7745	15.5996	23.3994	18.5245	25.3494	20.7995	18.8495
307	11.4833	17.1166	19.2833	22.0994	15.5996	22.7494	18.1995	25.6744	20.7995	18.8495
308	11.4833	17.1166	19.4999	22.0994	15.9246	23.3994	18.8495	25.3494	20.7995	18.8495
309	11.4833	17.5499	19.4999	21.7745	15.9246	23.3994	18.5245	25.0244	20.7995	18.8495
310	11.4833	17.1166	19.2833	22.0994	15.9246	23.0744	18.1995	25.6744	20.1495	18.8495
311	11.2666	17.1166	19.2833	21.7745	16.2496	23.3994	18.5245	25.9994	20.7995	18.8495
312	11.4833	17.1166	19.4999	22.0994	15.9246	23.0744	18.5245	25.3494	20.7995	18.5245
313	11.2666	17.3333	19.4999	22.0994	15.5996	22.7494	18.5245	25.6744	20.7995	18.5245
314	11.4833	17.1166	19.2833	22.0994	15.9246	22.7494	18.8495	25.6744	21.4495	18.8495
315	11.7	17.1166	19.4999	21.7745	15.5996	22.7494	18.5245	25.6744	20.7995	18.5245
316	11.7	17.1166	19.2833	22.0994	16.2496	22.4244	18.1995	25.9994	20.4745	18.8495
317	11.7	17.1166	19.4999	22.0994	15.9246	22.4244	18.5245	25.6744	21.1245	18.5245
318	11.4833	17.3333	19.4999	22.0994	15.5996	22.4244	18.5245	25.6744	20.7995	18.5245
319	11.4833	17.1166	19.4999	21.7745	16.2496	22.7494	18.5245	25.3494	20.4745	18.8495
320	11.9166	17.3333	19.4999	21.7745	15.9246	22.4244	18.5245	25.3494	20.4745	18.5245
321	11.7	17.1166	19.7166	22.0994	16.2496	22.4244	18.8495	25.9994	20.1495	19.1745
322	11.9166	17.1166	19.7166	21.7745	16.2496	22.0994	18.5245	25.9994	20.1495	18.5245
323	11.7	17.1166	19.4999	22.0994	16.2496	22.4244	18.1995	25.6744	20.7995	19.1745
324	11.7	17.1166	19.4999	22.0994	15.9246	22.0994	18.5245	25.6744	20.7995	19.1745
325	11.4833	17.1166	19.7166	22.0994	15.9246	22.4244	18.8495	25.6744	20.7995	18.5245
326	11.7	17.1166	19.7166	22.0994	16.2496	22.0994	18.8495	25.6744	20.1495	19.1745
327	11.4833	17.1166	19.7166	22.0994	15.9246	22.0994	18.5245	25.3494	19.8245	19.1745
328	11.4833	17.1166	19.4999	22.0994	15.9246	22.7494	18.5245	25.6744	20.1495	18.8495
329	11.4833	17.3333	19.7166	22.0994	15.9246	22.4244	18.5245	25.6744	20.1495	19.1745
330	11.7	17.1166	19.4999	22.0994	15.9246	22.7494	18.1995	25.9994	19.8245	19.1745
331	11.7	17.1166	19.7166	22.0994	15.5996	22.4244	18.5245	25.9994	19.8245	18.8495
332	11.7	17.1166	19.7166	22.0994	15.5996	22.0994	18.5245	25.6744	19.4995	18.8495
333	11.4833	17.1166	19.7166	22.0994	16.2496	22.7494	18.8495	25.9994	19.8245	18.8495
334	11.4833	17.1166	19.7166	22.0994	15.5996	22.4244	17.8746	25.6744	19.8245	19.1745
335	11.7	17.1166	19.7166	22.0994	16.2496	22.0994	18.1995	25.3494	20.4745	18.8495
336	11.7	17.1166	19.7166	22.0994	15.9246	22.7494	18.1995	25.9994	20.1495	18.8495
337	11.4833	17.1166	19.7166	22.0994	15.5996	22.4244	18.5245	25.6744	19.8245	18.8495
338	11.7	17.1166	19.7166	22.0994	16.2496	22.7494	18.1995	25.6744	19.8245	18.8495
339	11.7	17.3333	19.7166	22.0994	15.2746	22.7494	18.1995	25.6744	20.1495	18.8495
340	11.7	17.1166	19.7166	22.0994	15.5996	22.7494	18.5245	25.6744	19.4995	18.5245
341	11.4833	17.1166	19.4999	22.0994	16.2496	22.4244	18.5245	25.3494	19.4995	19.1745
342	11.4833	17.1166	19.9333	22.0994	15.9246	22.7494	18.5245	25.9994	19.8245	18.8495
343	11.4833	17.1166	19.7166	22.0994	16.2496	22.4244	18.5245	25.9994	19.4995	19.1745
344	11.4833	17.3333	19.7166	22.0994	15.5996	22.4244	18.5245	25.6744	20.1495	18.8495
345	11.4833	17.1166	19.7166	22.0994	15.5996	23.0744	18.1995	25.6744	20.4745	18.8495
346	11.4833	16.8999	19.7166	22.0994	15.9246	22.7494	18.5245	25.6744	20.1495	18.8495
347	11.4833	17.1166	19.7166	22.0994	16.2496	22.7494	18.8495	25.9994	20.1495	18.8495
348	11.2666	17.5499	19.9333	22.0994	16.2496	22.7494	18.5245	26.3243	19.8245	19.1745
349	11.2666	17.1166	20.1499	22.0994	15.9246	22.7494	18.5245	25.9994	19.4995	19.1745
350	11.7	17.1166	19.7166	21.7745	15.9246	22.4244	18.5245	25.9994	19.8245	19.1745
351	11.4833	17.1166	19.9333	22.0994	15.9246	22.7494	18.5245	26.3243	19.4995	18.8495
352	11.7	16.8999	19.9333	22.0994	15.5996	22.4244	18.8495	25.9994	19.1745	19.1745
353	11.2666	16.8999	19.9333	22.0994	15.5996	22.4244	18.5245	25.9994	19.4995	19.1745
354	11.4833	16.8999	19.9333	22.0994	15.9246	22.7494	18.5245	25.6744	19.4995	18.8495
355	11.4833	16.8999	19.4999	22.0994	15.5996	22.0994	18.8495	25.6744	19.8245	18.8495
356	11.9166	17.1166	19.7166	22.0994	15.5996	22.7494	18.1995	25.6744	19.4995	18.8495
357	11.4833	17.1166	19.9333	22.0994	15.2746	22.7494	18.5245	25.6744	19.8245	18.8495
358	11.2666	17.3333	19.9333	22.0994	15.9246	22.7494	18.5245	25.9994	19.8245	18.8495
359	11.4833	17.1166	19.9333	22.0994	15.5996	22.7494	18.5245	25.6744	19.8245	19.1745
360	11.2666	17.1166	19.7166	22.0994	15.5996	23.0744	18.5245	25.9994	19.8245	19.1745
361	11.7	16.8999	19.9333	22.0994	15.5996	22.4244	18.5245	26.3243	19.4995	19.1745
362	11.2666	17.1166	19.7166	22.0994	15.9246	23.0744	18.8495	25.3494	19.8245	19.4995
363	11.4833	17.1166	19.7166	21.7745	15.9246	23.0744	18.5245	25.6744	19.4995	19.4995
364	11.4833	17.1166	19.9333	22.0994	15.5996	22.7494	18.5245	25.6744	19.4995	19.4995
365	11.4833	17.1166	19.7166	22.0994	15.9246	22.4244	18.5245	25.9994	18.8495	19.1745
366	11.4833	16.8999	19.7166	22.0994	15.9246	22.7494	18.8495	25.6744	19.4995	19.1745
367	11.4833	17.1166	19.7166	22.0994	15.9246	22.4244	18.1995	25.3494	19.4995	19.4995
368	11.2666	17.1166	20.3666	22.0994	15.9246	22.4244	18.8495	25.9994	18.8495	19.1745
369	11.4833	17.1166	20.1499	22.0994	15.5996	22.7494	18.8495	25.6744	19.1745	19.4995
370	11.4833	17.1166	20.1499	22.0994	15.2746	22.7494	18.8495	25.9994	19.4995	19.1745
371	11.2666	16.8999	20.3666	22.4244	15.5996	22.7494	19.1745	26.3243	19.4995	19.1745
372	11.4833	17.1166	20.1499	22.4244	15.5996	22.0994	18.8495	25.9994	19.4995	19.4995
373	11.2666	17.1166	20.3666	22.0994	15.9246	22.4244	18.5245	26.3243	19.4995	19.4995
374	11.2666	17.1166	20.3666	22.0994	15.5996	22.0994	18.8495	26.3243	19.4995	19.4995
375	11.05	16.6833	20.3666	22.4244	16.2496	22.4244	19.1745	26.3243	19.1745	19.4995
376	11.4833	17.1166	20.1499	22.0994	15.5996	22.4244	18.8495	25.9994	18.8495	19.4995
377	11.2666	17.1166	20.3666	22.0994	15.2746	22.4244	18.5245	26.3243	19.1745	19.1745
378	11.2666	17.1166	20.5833	21.7745	15.9246	22.4244	18.8495	25.6744	19.4995	19.1745
379	11.2666	16.8999	20.3666	22.0994	15.9246	22.7494	18.5245	26.3243	19.1745	19.1745
380	11.2666	17.3333	20.1499	22.0994	15.5996	22.4244	18.8495	26.3243	19.1745	18.8495
381	11.2666	16.8999	20.3666	22.0994	15.5996	22.4244	18.5245	25.9994	19.1745	18.8495
382	11.4833	17.1166	20.3666	22.0994	15.5996	22.4244	18.8495	26.3243	19.4995	19.1745
383	11.2666	17.1166	20.3666	22.0994	15.9246	22.4244	18.5245	26.6493	18.8495	19.1745
384	11.2666	16.8999	20.3666	22.0994	15.5996	22.0994	18.8495	26.3243	19.1745	19.1745
385	11.2666	16.8999	20.3666	22.4244	15.5996	22.4244	18.8495	25.6744	18.8495	19.1745
386	11.4833	17.1166	20.1499	22.4244	14.9496	22.4244	18.5245	25.6744	19.8245	19.1745
387	11.2666	17.1166	20.3666	22.0994	16.2496	22.4244	18.5245	25.9994	19.1745	19.1745
388	11.2666	17.3333	20.3666	22.0994	16.2496	22.0994	18.8495	25.6744	19.4995	18.8495
389	11.4833	17.5499	20.1499	22.4244	16.2496	22.4244	18.1995	25.9994	19.1745	19.1745
390	11.2666	16.8999	20.1499	21.7745	15.5996	22.4244	18.8495	26.3243	19.8245	19.4995
391	11.2666	17.3333	20.3666	22.4244	16.2496	22.4244	18.8495	26.3243	19.4995	19.4995
392	11.7	17.1166	20.3666	22.0994	16.2496	22.4244	18.8495	26.3243	19.1745	19.4995
393	11.2666	17.1166	20.5833	22.4244	16.5746	22.4244	18.8495	25.9994	19.1745	19.4995
394	11.2666	17.3333	20.3666	22.4244	16.8996	22.4244	19.1745	26.3243	19.8245	19.4995
395	11.2666	17.1166	20.1499	22.4244	16.2496	22.4244	18.5245	26.3243	19.1745	19.4995
396	11.4833	17.1166	20.3666	22.0994	16.2496	22.4244	19.1745	26.6493	19.4995	19.4995
397	11.4833	16.8999	20.1499	22.0994	16.5746	22.4244	18.8495	25.9994	20.1495	19.4995
398	11.4833	16.8999	20.3666	22.4244	16.5746	22.4244	19.1745	25.9994	19.4995	19.4995
399	11.4833	16.8999	20.3666	22.4244	16.2496	22.4244	19.1745	25.6744	19.4995	19.1745
400	11.05	16.8999	20.5833	22.0994	16.5746	22.0994	19.1745	25.3494	19.4995	19.4995
401	11.2666	16.8999	20.5833	22.4244	16.5746	22.0994	18.8495	25.9994	19.1745	19.4995
402	11.4833	17.1166	20.3666	22.0994	16.5746	22.4244	18.8495	26.3243	19.1745	18.8495
403	11.2666	17.1166	20.5833	22.0994	16.5746	22.0994	18.8495	25.6744	18.8495	18.8495
404	11.4833	17.1166	20.3666	22.0994	16.2496	22.4244	18.1995	26.3243	19.1745	18.8495
405	11.05	17.1166	20.3666	22.0994	16.2496	22.4244	18.5245	26.3243	19.4995	18.8495
406	11.4833	16.8999	20.3666	22.0994	16.2496	22.4244	18.8495	26.3243	19.1745	18.8495
407	11.4833	17.1166	20.3666	22.4244	15.9246	22.0994	18.5245	25.9994	19.1745	19.1745
408	11.05	17.1166	20.3666	22.0994	15.2746	22.0994	19.1745	25.9994	19.1745	19.1745
409	11.2666	17.1166	20.3666	22.0994	15.5996	22.0994	19.1745	26.9743	19.8245	19.1745
410	11.4833	17.1166	20.5833	22.0994	16.2496	22.0994	18.5245	25.9994	19.8245	19.1745
411	11.4833	16.8999	20.3666	22.0994	15.9246	22.4244	18.8495	26.3243	19.1745	19.1745
412	11.2666	16.8999	20.3666	22.0994	15.9246	22.0994	18.8495	25.6744	19.4995	19.1745
413	11.2666	17.1166	20.3666	22.0994	15.9246	22.0994	18.5245	25.6744	19.4995	19.4995
414	11.2666	17.1166	20.5833	22.0994	16.2496	22.0994	19.1745	25.9994	19.1745	19.4995
415	11.2666	16.8999	20.5833	22.4244	16.2496	22.4244	18.8495	26.3243	19.1745	19.4995
416	11.4833	17.3333	20.5833	22.4244	15.9246	22.0994	18.8495	26.3243	19.4995	19.4995
417	11.7	17.1166	20.3666	22.4244	16.8996	22.4244	18.8495	25.9994	19.4995	19.1745
418	11.2666	16.8999	20.5833	22.4244	16.5746	22.0994	19.1745	26.6493	18.8495	19.1745
419	11.4833	16.8999	20.5833	22.0994	16.5746	22.0994	18.8495	25.9994	19.1745	18.8495
420	11.05	16.8999	20.5833	22.0994	16.5746	22.4244	18.1995	25.9994	18.8495	19.4995
421	11.4833	17.1166	20.5833	22.0994	16.5746	22.4244	19.1745	25.9994	18.8495	18.8495
422	11.2666	17.1166	20.3666	22.4244	16.2496	22.4244	18.8495	26.3243	19.4995	19.1745
423	11.05	17.1166	20.7999	22.0994	16.2496	22.0994	18.5245	26.3243	19.1745	18.8495
424	11.4833	17.1166	20.3666	22.0994	16.5746	22.4244	19.1745	26.6493	19.4995	18.8495
425	11.4833	17.1166	20.5833	21.7745	16.2496	22.0994	19.1745	26.3243	18.8495	18.8495
426	11.4833	16.8999	20.5833	22.0994	16.2496	22.0994	18.8495	25.9994	19.1745	19.1745
427	11.2666	16.8999	20.3666	22.0994	16.5746	22.0994	19.1745	27.2993	19.4995	18.8495
428	11.4833	17.1166	20.5833	22.4244	15.9246	22.0994	18.5245	26.9743	19.1745	19.1745
429	11.2666	16.8999	20.3666	22.4244	16.5746	21.7745	18.8495	26.3243	19.1745	18.8495
430	11.2666	17.3333	20.5833	22.4244	16.8996	22.0994	18.8495	26.3243	19.1745	18.8495
431	11.2666	17.1166	20.3666	22.0994	16.8996	22.4244	18.5245	26.3243	19.1745	18.8495
432	11.2666	17.1166	20.5833	22.0994	16.5746	22.0994	19.1745	25.9994	19.1745	18.8495
433	11.2666	16.8999	20.3666	22.0994	16.5746	22.0994	19.1745	26.3243	19.1745	18.8495
434	11.4833	16.6833	20.5833	22.0994	16.8996	22.4244	19.1745	26.3243	19.1745	18.8495
435	11.4833	16.8999	20.3666	22.0994	16.5746	22.0994	18.8495	26.3243	19.1745	18.8495
436	11.2666	17.1166	20.3666	22.4244	16.8996	22.4244	19.1745	25.9994	18.5245	18.5245
437	11.2666	17.1166	20.3666	22.4244	16.5746	22.4244	19.1745	26.9743	18.8495	18.5245
438	11.2666	17.1166	20.1499	22.4244	16.5746	22.4244	18.5245	26.9743	18.8495	18.5245
439	11.4833	17.1166	20.5833	22.0994	16.5746	22.4244	18.8495	25.9994	19.4995	18.5245
440	11.4833	17.3333	20.5833	22.4244	16.2496	22.4244	19.1745	26.6493	18.8495	18.8495
441	11.2666	17.1166	20.5833	22.0994	16.2496	21.7745	18.8495	25.9994	19.1745	18.5245
442	11.4833	17.1166	20.1499	22.4244	16.2496	22.4244	18.8495	25.6744	19.4995	18.8495
443	11.4833	17.1166	20.1499	22.0994	15.9246	22.0994	19.1745	26.3243	19.4995	18.8495
444	11.2666	17.1166	20.5833	22.4244	16.2496	22.0994	19.1745	25.9994	19.1745	18.8495
445	11.2666	17.1166	20.3666	22.0994	16.2496	22.4244	19.1745	25.9994	18.8495	19.1745
446	11.4833	17.1166	20.3666	22.4244	16.2496	22.4244	18.8495	26.3243	18.8495	18.8495
447	11.2666	16.8999	20.1499	22.0994	16.2496	22.0994	18.8495	25.9994	19.1745	18.8495
448	11.05	17.1166	20.3666	22.4244	15.9246	22.0994	19.1745	25.9994	19.1745	18.8495
449	11.2666	16.8999	20.3666	22.4244	16.2496	22.0994	19.4995	25.9994	19.8245	18.8495
450	11.05	16.8999	20.3666	22.7494	16.2496	21.7745	18.8495	26.6493	19.1745	18.8495
451	11.05	17.1166	20.5833	22.4244	15.9246	22.0994	18.8495	25.9994	19.1745	18.5245
452	11.2666	16.8999	20.3666	22.4244	16.2496	22.0994	19.1745	25.9994	19.8245	18.5245
453	11.2666	17.1166	20.1499	22.4244	16.2496	22.0994	19.1745	26.3243	19.1745	18.5245
454	11.2666	16.8999	20.1499	22.4244	16.2496	22.4244	19.1745	26.3243	19.4995	18.8495
455	11.7	16.6833	20.1499	22.4244	16.8996	22.4244	19.1745	26.6493	19.4995	18.8495
456	11.4833	16.6833	20.1499	22.4244	16.2496	22.4244	19.1745	26.3243	19.1745	18.8495
457	11.2666	17.3333	20.1499	22.4244	16.2496	22.4244	18.8495	25.9994	19.1745	18.8495
458	10.8333	16.8999	20.3666	22.7494	16.2496	21.7745	19.1745	26.6493	19.8245	18.5245
459	11.2666	17.1166	20.3666	22.4244	16.2496	22.0994	19.1745	25.6744	19.1745	18.8495
460	11.2666	16.8999	20.5833	22.4244	15.9246	21.7745	18.8495	26.9743	19.8245	18.8495
461	11.4833	17.1166	20.3666	22.4244	16.2496	22.4244	19.1745	26.6493	19.1745	19.1745
462	11.2666	16.8999	20.1499	22.7494	15.9246	21.7745	18.8495	26.6493	19.1745	18.8495
463	11.4833	16.8999	20.3666	22.4244	16.2496	22.4244	18.8495	26.6493	19.1745	19.1745
464	11.4833	17.1166	20.1499	22.4244	16.2496	22.0994	19.1745	26.9743	19.4995	18.8495
465	11.2666	16.8999	20.5833	22.4244	16.2496	22.4244	18.8495	25.6744	19.1745	18.8495
466	11.05	17.1166	20.3666	22.4244	16.2496	22.0994	19.1745	26.6493	19.8245	18.8495
467	11.4833	17.1166	20.5833	22.4244	16.2496	21.7745	19.1745	26.9743	19.8245	18.8495
468	11.05	16.8999	20.5833	22.4244	16.5746	22.0994	18.8495	25.9994	19.8245	19.1745
469	11.4833	17.1166	20.5833	22.4244	16.5746	22.0994	19.1745	26.9743	18.8495	18.8495
470	11.2666	16.6833	20.5833	22.4244	16.2496	22.4244	18.8495	26.6493	19.1745	19.4995
471	11.2666	16.8999	20.3666	22.4244	16.2496	22.4244	19.1745	26.9743	19.1745	19.4995
472	11.4833	17.1166	20.5833	22.0994	16.2496	22.0994	19.1745	26.6493	19.1745	19.1745
473	11.4833	16.6833	20.5833	22.4244	16.2496	21.7745	19.1745	25.9994	19.4995	18.8495
474	11.4833	16.8999	20.5833	22.4244	16.2496	22.4244	18.8495	26.3243	19.1745	19.1745
475	11.2666	16.6833	20.1499	22.4244	16.2496	22.4244	19.8245	26.3243	19.1745	19.1745
476	11.4833	17.1166	20.3666	22.0994	16.2496	22.4244	19.1745	26.6493	19.1745	18.8495
477	11.4833	17.1166	20.5833	22.4244	16.5746	22.0994	18.8495	26.3243	18.8495	18.8495
478	11.05	16.6833	20.5833	22.4244	16.5746	21.7745	18.8495	25.9994	20.1495	19.1745
479	11.4833	16.6833	20.3666	22.4244	16.2496	22.4244	18.8495	26.9743	18.8495	18.8495
480	11.2666	17.1166	20.3666	22.7494	16.5746	22.0994	18.8495	26.6493	19.1745	18.8495
481	10.8333	16.8999	20.3666	22.4244	16.8996	22.0994	19.4995	25.6744	19.1745	18.8495
482	11.05	16.6833	20.3666	22.4244	16.5746	22.0994	19.1745	26.9743	19.4995	18.8495
483	11.2666	17.1166	20.3666	22.4244	16.5746	22.4244	19.1745	26.9743	19.4995	18.5245
484	11.4833	16.8999	20.1499	22.7494	16.8996	22.0994	19.1745	27.2993	18.8495	18.8495
485	10.8333	16.8999	20.3666	22.4244	16.5746	22.4244	19.8245	26.3243	18.5245	18.8495
486	11.2666	16.6833	20.3666	22.4244	16.5746	22.0994	19.4995	25.9994	19.4995	18.8495
487	11.2666	17.1166	20.5833	22.4244	16.5746	22.4244	18.5245	26.9743	19.4995	18.8495
488	11.4833	16.8999	20.1499	22.4244	16.5746	22.0994	19.1745	26.9743	19.4995	18.8495
489	11.4833	16.8999	20.3666	22.4244	16.5746	22.0994	18.8495	27.2993	18.8495	18.8495
490	11.4833	16.8999	20.3666	22.4244	16.8996	22.4244	18.8495	26.9743	19.1745	18.8495
491	11.2666	16.6833	20.1499	22.7494	16.8996	22.0994	18.8495	26.3243	20.4745	19.1745
492	11.4833	16.8999	20.3666	22.4244	16.8996	22.0994	19.1745	26.9743	18.8495	19.1745
493	11.4833	16.6833	20.3666	22.0994	16.5746	22.0994	19.1745	26.9743	18.8495	18.5245
494	11.2666	16.8999	20.3666	22.4244	16.5746	22.0994	19.1745	27.2993	19.1745	18.5245
495	11.2666	16.6833	20.3666	22.0994	16.8996	22.4244	19.1745	26.6493	19.1745	18.8495
496	11.4833	16.6833	20.3666	22.4244	16.5746	22.4244	19.1745	26.9743	19.1745	18.8495
497	11.2666	16.8999	20.5833	22.0994	16.8996	22.0994	18.8495	26.9743	19.1745	18.8495
498	11.2666	16.6833	20.3666	22.4244	16.8996	22.4244	19.4995	26.6493	19.1745	18.5245
499	11.05	16.8999	20.3666	22.4244	16.8996	22.4244	19.1745	26.9743	18.8495	18.8495
500	11.2666	16.6833	20.1499	22.4244	16.5746	22.4244	19.1745	26.9743	19.1745	18.8495
501	11.4833	16.8999	20.3666	22.4244	16.5746	22.0994	19.1745	26.9743	18.8495	18.8495
502	10.8333	17.1166	20.3666	22.4244	16.2496	22.4244	19.1745	26.9743	19.4995	19.1745
503	11.05	17.1166	20.1499	22.4244	16.2496	22.0994	18.8495	26.6493	19.8245	19.1745
504	11.2666	16.6833	20.3666	22.4244	16.5746	22.4244	19.4995	26.9743	19.1745	18.5245
505	11.2666	16.6833	20.5833	22.4244	16.5746	22.7494	19.1745	26.6493	19.1745	19.1745
506	11.2666	17.1166	20.5833	22.4244	16.5746	22.4244	19.4995	26.9743	19.1745	18.8495
507	11.4833	16.8999	20.5833	22.4244	16.2496	22.4244	19.4995	26.6493	19.1745	18.8495
508	11.05	17.1166	20.1499	22.7494	16.5746	23.0744	19.4995	27.6243	19.4995	19.1745
509	11.05	17.1166	20.3666	22.7494	15.9246	21.7745	19.1745	26.9743	20.1495	19.1745
510	11.2666	16.8999	20.3666	22.4244	16.5746	22.0994	19.1745	27.2993	19.4995	18.8495
511	11.2666	17.1166	20.1499	22.7494	15.9246	23.0744	19.1745	27.6243	19.4995	18.8495
512	11.2666	17.1166	20.5833	22.4244	15.9246	22.0994	18.8495	26.9743	18.5245	18.8495
513	11.05	16.8999	20.3666	22.4244	15.9246	22.7494	19.4995	25.9994	18.8495	19.1745
514	11.2666	17.1166	20.5833	22.7494	15.5996	22.7494	19.1745	26.9743	18.5245	19.1745
515	11.05	16.8999	20.1499	22.7494	16.2496	22.7494	19.4995	26.3243	18.8495	18.8495
516	11.2666	16.8999	20.3666	22.4244	15.5996	23.0744	19.1745	26.9743	19.1745	18.8495
517	11.05	17.1166	20.1499	22.7494	15.9246	23.0744	18.8495	26.9743	18.5245	18.8495
518	11.05	17.1166	20.5833	22.4244	16.2496	23.0744	19.8245	26.6493	18.8495	18.8495
519	11.4833	17.1166	20.3666	22.4244	15.9246	22.4244	19.4995	26.9743	19.1745	18.8495
520	11.05	17.3333	20.1499	22.7494	15.9246	22.7494	19.4995	26.9743	18.1995	18.8495
521	11.2666	17.1166	20.1499	22.4244	16.2496	23.0744	19.1745	26.3243	18.8495	18.8495
522	11.2666	17.1166	20.3666	22.7494	15.9246	22.7494	18.8495	27.2993	19.4995	18.8495
523	11.05	17.1166	20.3666	22.4244	15.9246	22.0994	19.4995	27.2993	18.8495	18.8495
524	11.05	16.8999	20.3666	22.4244	15.5996	22.7494	19.4995	26.6493	19.1745	18.8495
525	11.2666	17.3333	20.1499	22.4244	15.9246	22.7494	19.4995	25.9994	19.1745	18.8495
526	11.05	17.1166	20.1499	22.4244	16.2496	21.7745	19.4995	27.2993	18.5245	18.8495
527	11.2666	16.8999	20.5833	22.4244	15.9246	22.0994	19.1745	26.6493	18.5245	19.1745
528	11.05	17.1166	20.5833	22.4244	15.9246	22.7494	19.1745	26.9743	19.1745	18.8495
529	11.05	16.8999	20.5833	22.4244	15.9246	22.0994	19.4995	26.9743	18.1995	19.1745
530	10.8333	17.3333	20.5833	22.4244	16.5746	22.4244	19.1745	26.9743	19.1745	18.8495
531	11.2666	17.3333	20.5833	22.4244	16.2496	22.7494	19.1745	26.6493	18.8495	19.1745
532	11.05	17.3333	20.7999	22.4244	16.5746	22.7494	19.1745	27.6243	18.8495	18.8495
533	11.2666	17.5499	21.0166	22.4244	16.2496	22.0994	19.1745	26.6493	19.4995	18.8495
534	11.2666	17.3333	20.5833	22.4244	15.9246	22.4244	19.1745	26.9743	18.8495	19.4995
535	11.2666	17.1166	20.5833	22.4244	16.2496	22.4244	19.4995	26.6493	18.8495	18.8495
536	11.05	17.5499	20.7999	22.7494	16.2496	22.0994	19.4995	27.6243	18.8495	18.5245
537	11.2666	17.3333	20.5833	22.4244	16.5746	22.4244	19.1745	27.2993	19.1745	18.8495
538	11.2666	17.5499	20.7999	22.7494	16.5746	22.4244	19.1745	26.6493	18.8495	18.8495
539	11.2666	17.1166	20.7999	22.7494	16.2496	22.4244	18.8495	26.9743	18.8495	19.1745
540	11.05	17.3333	20.5833	22.7494	15.9246	21.7745	19.1745	27.2993	18.8495	18.5245
541	11.2666	17.1166	20.5833	22.7494	16.2496	22.0994	19.1745	27.6243	18.8495	18.8495
542	11.7	16.8999	20.7999	22.7494	16.2496	22.4244	19.1745	27.2993	19.1745	19.1745
543	11.05	17.3333	20.7999	22.7494	16.2496	21.7745	19.4995	27.2993	19.1745	19.1745
544	11.4833	17.1166	20.5833	22.7494	16.5746	22.0994	19.4995	27.2993	19.1745	18.8495
545	11.4833	17.1166	20.7999	22.7494	16.2496	21.7745	19.4995	26.9743	19.1745	18.8495
546	11.2666	16.8999	20.7999	22.7494	16.2496	22.4244	18.8495	26.9743	19.1745	19.1745
547	11.2666	17.5499	20.7999	22.7494	15.9246	21.7745	19.1745	27.2993	19.1745	18.8495
548	11.2666	16.8999	20.7999	22.7494	15.9246	22.0994	19.1745	27.2993	19.8245	19.1745
549	10.6166	17.5499	20.7999	22.7494	15.9246	21.7745	19.1745	26.9743	19.4995	18.8495
550	11.05	17.1166	20.7999	22.7494	16.2496	21.4495	19.4995	27.2993	19.8245	19.1745
551	11.05	17.1166	20.7999	22.7494	16.2496	21.1245	19.4995	27.2993	19.8245	19.1745
552	11.05	17.3333	20.7999	22.7494	15.9246	22.0994	19.4995	26.9743	19.1745	19.1745
553	11.4833	17.1166	20.7999	22.7494	15.9246	22.0994	19.8245	27.2993	19.1745	19.1745
554	11.05	17.7666	20.7999	22.7494	16.2496	22.0994	19.8245	27.6243	18.8495	19.1745
555	11.2666	17.1166	20.7999	22.7494	16.2496	22.0994	19.4995	26.9743	19.4995	18.8495
556	10.8333	17.3333	20.3666	22.7494	15.9246	22.0994	19.4995	27.2993	18.5245	19.1745
557	10.8333	16.8999	20.7999	22.7494	15.9246	22.0994	19.1745	26.6493	19.8245	18.8495
558	10.4	17.1166	20.5833	22.7494	16.2496	22.0994	19.4995	26.9743	19.1745	18.5245
559	10.8333	17.3333	20.7999	22.7494	15.9246	22.0994	20.1495	27.2993	19.4995	18.5245
560	11.2666	17.1166	20.5833	22.7494	16.2496	22.0994	19.4995	26.9743	19.8245	18.5245
561	10.6166	17.1166	20.7999	22.7494	15.9246	21.7745	19.1745	27.2993	19.4995	18.5245
562	10.8333	17.3333	20.7999	22.7494	15.9246	21.4495	19.8245	27.2993	19.1745	18.8495
563	10.8333	17.5499	20.7999	22.7494	15.9246	22.0994	19.4995	27.2993	19.1745	18.8495
564	10.8333	16.8999	20.7999	22.7494	15.9246	22.4244	20.1495	27.2993	19.1745	18.8495
565	11.05	16.8999	20.7999	22.7494	15.9246	22.0994	19.1745	27.6243	19.4995	18.5245
566	10.6166	17.7666	20.7999	22.7494	15.9246	22.0994	19.4995	27.6243	20.1495	18.5245
567	10.4	17.1166	20.7999	22.7494	15.9246	22.0994	19.4995	27.6243	19.1745	18.1995
568	10.8333	16.8999	20.7999	22.7494	16.2496	22.0994	19.1745	26.9743	19.4995	18.5245
569	11.05	16.8999	20.5833	22.7494	16.2496	21.7745	19.4995	25.9994	19.4995	18.5245
570	10.8333	17.1166	20.7999	22.7494	16.2496	22.0994	19.4995	26.6493	19.1745	18.5245
571	10.8333	16.8999	20.7999	22.7494	16.2496	22.0994	19.8245	26.9743	19.1745	18.8495
572	11.05	17.1166	20.7999	22.7494	16.2496	21.7745	19.1745	26.9743	19.1745	18.5245
573	11.05	16.8999	20.7999	22.7494	15.9246	22.4244	19.4995	26.6493	19.1745	18.1995
574	10.8333	17.5499	20.7999	22.7494	15.9246	22.0994	19.4995	27.2993	19.8245	19.1745
575	11.05	17.1166	20.7999	22.7494	16.2496	21.7745	19.1745	27.2993	19.8245	18.8495
576	11.05	16.8999	20.7999	23.0744	15.9246	22.0994	19.8245	26.3243	19.4995	18.8495
577	11.05	16.8999	20.7999	22.7494	16.2496	22.0994	19.4995	26.6493	19.8245	18.8495
578	11.2666	17.1166	21.0166	22.7494	16.5746	22.0994	19.4995	26.9743	19.8245	18.1995
579	10.6166	17.1166	20.7999	22.7494	16.5746	22.0994	19.1745	26.9743	19.4995	18.5245
580	10.8333	17.3333	21.0166	22.7494	16.5746	22.0994	19.8245	26.9743	19.1745	18.1995
581	11.05	17.1166	21.0166	22.7494	16.2496	22.0994	19.8245	26.9743	19.1745	18.5245
582	11.05	17.1166	20.7999	22.7494	16.5746	22.0994	19.4995	27.2993	19.1745	18.5245
583	11.05	17.1166	20.7999	22.7494	16.5746	21.7745	19.4995	27.2993	19.8245	19.1745
584	11.05	17.1166	20.7999	22.7494	16.2496	22.0994	19.4995	26.6493	19.4995	18.8495
585	10.6166	16.8999	20.7999	22.7494	16.5746	21.7745	19.8245	26.9743	19.4995	18.8495
586	11.05	17.3333	20.5833	22.7494	15.9246	22.0994	19.4995	27.2993	19.4995	18.8495
587	10.8333	17.1166	20.7999	22.7494	15.9246	22.4244	19.8245	27.2993	19.8245	18.5245
588	10.8333	16.8999	21.0166	22.7494	15.9246	22.4244	19.4995	27.2993	19.8245	18.8495
589	11.05	17.1166	20.5833	22.7494	15.9246	22.0994	19.4995	27.2993	19.4995	18.8495
590	10.8333	17.1166	20.7999	22.7494	15.9246	22.4244	19.4995	27.9493	19.4995	18.1995
591	11.2666	16.8999	21.0166	22.7494	15.9246	22.4244	19.1745	26.9743	19.4995	18.5245
592	11.2666	17.1166	21.0166	22.7494	16.2496	22.0994	19.4995	27.6243	19.4995	18.8495
593	11.05	17.1166	21.4499	22.7494	16.2496	22.4244	19.8245	26.6493	19.8245	18.5245
594	11.2666	16.8999	20.7999	22.7494	16.2496	21.7745	19.4995	27.6243	19.1745	18.1995
595	10.8333	16.8999	21.2333	22.7494	16.2496	22.0994	19.4995	27.6243	19.4995	18.5245
596	11.2666	17.1166	20.7999	22.7494	16.2496	21.7745	19.1745	26.6493	18.8495	18.8495
597	11.4833	16.8999	21.0166	22.7494	16.2496	22.4244	19.1745	26.9743	19.4995	18.5245
598	11.05	16.8999	21.0166	22.7494	15.9246	22.4244	19.4995	27.9493	19.8245	18.8495
599	11.2666	17.1166	21.0166	22.7494	16.2496	21.4495	19.8245	26.9743	19.8245	18.5245
600	11.05	17.1166	20.7999	23.0744	15.9246	21.7745	18.8495	27.2993	19.4995	18.1995
601	11.05	17.1166	20.7999	22.7494	16.2496	22.0994	19.1745	27.2993	19.4995	18.8495
602	10.8333	17.1166	21.2333	22.7494	16.2496	21.7745	19.8245	27.6243	19.4995	18.5245
603	11.05	16.8999	21.2333	22.7494	15.9246	22.0994	19.4995	27.2993	19.1745	18.8495
604	11.05	17.1166	20.7999	22.7494	16.2496	22.0994	19.4995	27.2993	19.8245	18.5245
605	11.05	17.1166	20.7999	22.7494	16.2496	22.4244	19.8245	27.2993	19.8245	18.5245
606	11.05	16.8999	21.4499	22.7494	15.9246	22.4244	19.4995	26.9743	19.1745	18.5245
607	10.6166	16.8999	21.0166	22.7494	16.2496	22.7494	19.4995	26.9743	19.4995	18.5245
608	11.05	16.8999	21.4499	22.7494	16.2496	22.4244	19.8245	26.6493	19.8245	18.5245
609	10.8333	17.1166	21.0166	22.7494	16.5746	22.0994	19.8245	27.2993	19.8245	18.5245
610	10.8333	17.1166	20.7999	22.7494	16.2496	22.4244	19.4995	27.2993	20.1495	18.5245
611	10.6166	16.8999	20.7999	22.7494	16.2496	21.7745	19.8245	26.6493	19.8245	18.5245
612	11.05	17.1166	21.2333	22.7494	16.8996	21.7745	19.1745	26.9743	19.4995	18.1995
613	11.2666	17.1166	21.0166	23.0744	16.5746	21.7745	19.4995	26.9743	19.4995	18.5245
614	10.6166	17.1166	21.0166	22.7494	16.5746	22.4244	19.8245	26.9743	19.4995	18.5245
615	11.05	16.8999	20.7999	22.7494	16.5746	22.4244	19.1745	27.6243	19.4995	18.5245
616	10.8333	17.1166	20.5833	22.7494	16.5746	22.4244	19.4995	27.2993	19.4995	19.1745
617	10.8333	17.3333	20.5833	23.0744	16.5746	22.0994	20.1495	26.9743	19.8245	18.8495
618	11.05	17.1166	21.0166	22.7494	16.2496	22.0994	19.1745	27.2993	19.8245	18.8495
619	10.6166	17.1166	21.0166	22.7494	16.5746	22.0994	19.4995	26.6493	19.4995	18.5245
620	11.05	17.1166	21.0166	22.7494	16.5746	21.7745	19.8245	26.9743	19.8245	18.5245
621	11.05	17.1166	20.7999	22.7494	16.8996	22.0994	19.4995	26.9743	19.4995	18.5245
622	10.8333	16.8999	20.7999	23.0744	15.9246	22.4244	19.1745	27.2993	19.8245	18.8495
623	10.4	17.1166	21.0166	22.7494	16.2496	22.4244	19.4995	27.6243	19.8245	18.1995
624	10.8333	17.1166	20.7999	22.7494	16.5746	22.0994	19.1745	26.9743	19.8245	18.5245
625	10.6166	17.1166	20.5833	22.7494	16.5746	22.0994	19.4995	26.6493	19.4995	18.5245
626	11.05	16.8999	20.7999	22.7494	16.5746	22.4244	19.8245	26.6493	19.1745	18.5245
627	10.6166	17.1166	20.5833	22.7494	16.2496	22.0994	19.4995	27.2993	19.1745	19.1745
628	11.05	16.8999	21.2333	22.7494	16.5746	22.0994	19.4995	27.2993	19.4995	18.5245
629	10.8333	16.8999	20.7999	23.0744	16.5746	22.4244	20.1495	27.6243	19.4995	18.5245
630	11.4833	16.8999	20.7999	22.7494	16.2496	22.7494	19.8245	27.6243	19.8245	19.1745
631	10.8333	17.1166	21.2333	22.7494	16.2496	22.4244	19.8245	27.6243	19.4995	18.8495
632	11.05	16.8999	21.2333	22.7494	16.2496	22.0994	19.4995	27.2993	19.1745	18.8495
633	11.05	16.8999	20.7999	23.0744	15.9246	22.0994	19.4995	27.2993	18.8495	19.4995
634	10.4	17.1166	20.7999	22.7494	16.2496	22.4244	19.4995	27.2993	19.8245	19.8245
635	10.8333	17.3333	20.5833	22.7494	15.9246	22.0994	19.4995	27.6243	19.4995	19.8245
636	10.6166	17.1166	21.2333	22.7494	15.9246	22.4244	19.4995	27.6243	20.1495	18.8495
637	11.05	16.8999	20.7999	22.7494	16.8996	22.0994	19.1745	26.9743	19.8245	19.1745
638	11.05	17.1166	21.0166	22.7494	16.2496	22.0994	19.4995	26.9743	19.1745	18.8495
639	10.8333	16.8999	20.7999	23.0744	16.2496	22.4244	19.8245	26.3243	19.1745	18.5245
640	11.05	17.1166	20.5833	22.7494	16.2496	22.0994	19.8245	26.6493	19.8245	18.8495
641	11.05	16.8999	20.7999	22.7494	16.2496	22.0994	19.1745	27.6243	19.4995	19.1745
642	10.8333	16.8999	20.5833	23.0744	16.2496	22.4244	19.8245	26.6493	19.1745	19.1745
643	10.8333	16.8999	20.7999	22.7494	15.9246	22.4244	20.1495	27.6243	19.1745	19.1745
644	11.05	16.8999	20.5833	22.7494	15.9246	22.4244	19.1745	26.9743	19.4995	18.8495
645	10.8333	16.8999	21.0166	23.0744	15.9246	22.4244	19.8245	27.6243	19.8245	19.1745
646	10.4	17.1166	20.5833	22.7494	15.9246	22.0994	19.8245	27.6243	19.8245	19.1745
647	11.05	17.1166	20.7999	22.7494	15.9246	22.4244	19.8245	26.9743	19.8245	19.1745
648	11.05	16.8999	20.5833	22.7494	15.5996	22.0994	19.8245	26.9743	19.4995	19.4995
649	11.05	16.8999	20.7999	23.0744	16.2496	22.0994	20.1495	26.9743	19.4995	19.1745
650	11.05	16.8999	21.0166	22.7494	16.2496	22.0994	19.4995	27.9493	19.4995	19.4995
651	11.05	17.1166	20.7999	23.0744	15.9246	22.0994	20.1495	27.6243	18.8495	19.4995
652	10.8333	17.1166	20.7999	23.0744	15.9246	21.7745	19.8245	27.2993	19.8245	19.1745
653	11.05	16.6833	21.2333	23.3994	15.9246	21.7745	19.4995	26.9743	19.1745	18.8495
654	10.6166	16.8999	21.0166	23.0744	15.9246	21.7745	19.4995	27.2993	19.4995	19.1745
655	11.05	16.4666	20.7999	22.7494	15.2746	22.7494	19.8245	27.2993	19.4995	18.5245
656	11.05	16.8999	20.7999	22.7494	15.9246	22.4244	19.8245	27.9493	19.8245	18.8495
657	10.8333	16.8999	20.5833	23.0744	15.9246	22.0994	19.4995	27.6243	19.4995	19.1745
658	10.8333	17.1166	20.5833	22.7494	15.9246	22.0994	19.8245	27.2993	19.8245	19.4995
659	10.8333	16.4666	20.7999	22.7494	15.9246	22.7494	19.4995	26.3243	19.4995	19.1745
660	11.05	16.4666	20.5833	22.7494	15.9246	22.0994	19.4995	26.9743	20.4745	19.4995
661	11.4833	16.6833	20.3666	23.0744	15.9246	22.4244	19.8245	27.9493	19.8245	19.1745
662	11.05	16.6833	20.7999	23.0744	16.2496	22.0994	19.1745	27.6243	19.8245	19.1745
663	10.8333	16.8999	20.7999	23.0744	16.2496	22.0994	19.8245	27.2993	19.8245	19.4995
664	10.8333	16.6833	20.5833	23.0744	15.9246	22.0994	20.1495	27.2993	19.4995	19.4995
665	11.05	16.6833	20.7999	23.0744	15.9246	22.0994	19.8245	27.6243	19.4995	19.1745
666	10.8333	16.8999	20.7999	22.7494	16.2496	22.0994	19.8245	27.2993	19.8245	19.1745
667	10.6166	16.6833	21.0166	22.7494	15.9246	22.0994	19.4995	27.6243	19.8245	19.8245
668	10.8333	16.6833	20.7999	22.7494	15.9246	22.0994	19.4995	27.6243	19.8245	19.4995
669	10.4	16.8999	20.7999	22.7494	15.9246	22.0994	19.1745	27.2993	19.4995	18.8495
670	10.8333	17.1166	20.5833	23.0744	15.9246	21.7745	19.8245	27.6243	19.1745	19.8245
671	10.6166	16.8999	20.5833	23.0744	15.5996	22.0994	19.4995	27.9493	19.1745	19.4995
672	11.05	16.6833	20.5833	23.0744	15.9246	22.0994	19.4995	27.9493	19.8245	19.4995
673	10.6166	16.6833	20.5833	23.0744	15.9246	22.0994	20.1495	27.6243	19.8245	19.4995
674	10.8333	16.8999	20.5833	23.0744	15.9246	22.0994	19.8245	27.2993	19.8245	19.1745
675	11.05	16.6833	20.5833	22.7494	15.5996	22.0994	19.4995	27.9493	19.4995	19.1745
676	10.8333	16.8999	20.5833	23.0744	15.5996	22.0994	19.4995	26.6493	20.4745	19.4995
677	10.6166	16.8999	21.0166	22.7494	15.9246	22.4244	19.8245	26.9743	20.4745	19.1745
678	11.05	16.8999	20.5833	23.0744	15.5996	22.0994	20.1495	28.2743	19.4995	19.1745
679	10.8333	16.8999	20.5833	23.0744	16.2496	22.0994	19.4995	27.2993	19.8245	19.1745
680	11.05	16.6833	20.3666	22.7494	16.2496	22.4244	19.4995	27.2993	19.4995	19.1745
681	11.05	16.6833	21.0166	23.0744	15.5996	22.4244	19.4995	26.3243	19.8245	19.8245
682	10.8333	16.6833	20.7999	23.0744	16.2496	22.0994	19.8245	26.9743	19.8245	19.4995
683	10.8333	16.6833	20.7999	23.0744	15.5996	22.0994	19.8245	27.6243	19.8245	19.4995
684	11.05	16.6833	20.7999	23.0744	15.9246	22.4244	19.4995	27.6243	19.4995	19.1745
685	10.8333	16.6833	21.0166	23.0744	16.2496	22.4244	19.8245	27.9493	19.4995	19.4995
686	11.05	16.8999	20.7999	22.7494	15.5996	22.4244	19.8245	27.9493	19.8245	18.8495
687	10.8333	16.6833	20.7999	22.7494	15.5996	22.0994	20.1495	27.2993	19.4995	19.1745
688	11.05	16.6833	20.7999	23.0744	15.9246	22.0994	19.4995	27.2993	19.8245	18.8495
689	11.2666	16.8999	20.7999	23.0744	15.9246	22.4244	19.8245	27.2993	19.8245	19.1745
690	10.6166	16.2499	20.7999	23.0744	15.5996	22.0994	20.1495	27.2993	19.4995	19.1745
691	10.8333	16.6833	20.7999	23.0744	15.9246	21.7745	19.8245	27.9493	19.4995	19.1745
692	10.8333	16.6833	20.5833	23.0744	16.2496	22.4244	19.4995	27.6243	19.4995	19.4995
693	11.2666	17.1166	20.7999	23.0744	15.9246	22.0994	19.1745	27.6243	19.8245	19.4995
694	10.8333	16.6833	20.7999	22.7494	15.5996	22.0994	19.8245	26.6493	20.1495	19.1745
695	10.8333	16.8999	20.7999	23.0744	15.5996	22.0994	19.8245	26.9743	19.4995	19.1745
696	10.6166	16.6833	20.7999	22.7494	15.2746	22.0994	20.1495	27.2993	19.4995	18.8495
697	10.8333	16.6833	21.0166	23.0744	15.5996	22.0994	19.4995	27.2993	19.8245	19.1745
698	10.6166	16.8999	20.5833	23.0744	16.2496	22.0994	19.8245	27.6243	19.4995	19.1745
699	11.05	16.8999	21.0166	22.7494	14.9496	22.0994	19.4995	26.9743	19.4995	19.1745
700	11.05	16.8999	21.0166	23.0744	14.9496	22.0994	20.1495	27.2993	19.1745	19.1745
701	10.8333	16.8999	20.7999	22.7494	15.2746	22.0994	19.4995	27.6243	19.8245	19.1745
702	10.8333	16.8999	20.7999	23.0744	15.5996	22.0994	19.8245	27.6243	19.4995	18.8495
703	10.8333	16.8999	20.7999	23.0744	15.2746	22.4244	20.1495	27.6243	19.1745	19.1745
704	10.6166	16.8999	20.7999	22.7494	14.9496	22.0994	19.8245	27.6243	19.4995	19.1745
705	10.6166	16.8999	21.0166	23.0744	14.9496	22.0994	20.1495	27.6243	19.4995	19.1745
706	10.6166	17.1166	20.7999	23.0744	15.2746	22.0994	19.4995	27.6243	19.8245	19.1745
707	10.8333	16.8999	21.0166	23.0744	14.9496	22.4244	20.1495	27.2993	19.4995	19.1745
708	10.8333	16.6833	20.7999	23.0744	14.9496	22.4244	19.8245	27.6243	19.8245	19.4995
709	11.05	16.6833	20.7999	22.7494	16.2496	22.4244	19.8245	27.6243	19.8245	19.1745
710	10.6166	16.6833	21.0166	22.7494	15.2746	22.4244	19.8245	27.6243	19.8245	19.1745
711	11.05	16.6833	21.0166	23.0744	15.2746	22.7494	19.8245	27.6243	20.1495	19.1745
712	11.05	16.6833	21.0166	23.0744	15.5996	22.0994	19.8245	28.2743	20.1495	19.4995
713	11.2666	16.8999	21.0166	23.0744	15.9246	22.0994	20.1495	27.2993	19.4995	19.1745
714	10.8333	16.8999	20.7999	22.7494	15.5996	22.4244	19.8245	27.6243	19.8245	19.8245
715	11.05	17.3333	21.0166	23.0744	15.5996	21.7745	19.8245	27.9493	20.1495	19.4995
716	10.8333	16.8999	20.7999	22.7494	15.5996	22.0994	19.8245	27.2993	19.4995	19.4995
717	10.6166	16.8999	21.0166	22.7494	15.5996	22.4244	20.1495	27.2993	20.1495	19.4995
718	11.05	16.6833	21.0166	23.0744	15.9246	22.0994	20.1495	27.2993	19.4995	19.4995
719	10.8333	17.3333	20.7999	23.0744	15.9246	21.7745	19.8245	27.6243	20.1495	19.4995
720	11.05	16.8999	21.0166	22.7494	15.5996	22.4244	19.8245	27.6243	19.8245	19.4995
721	10.6166	16.8999	20.7999	23.0744	16.2496	22.0994	20.1495	27.2993	19.4995	19.4995
722	10.6166	16.6833	21.0166	22.7494	16.2496	22.4244	20.1495	27.6243	19.8245	19.4995
723	10.8333	16.6833	20.7999	23.0744	16.2496	22.0994	20.1495	27.9493	19.8245	19.4995
724	11.05	16.6833	21.0166	22.7494	15.9246	21.7745	19.8245	27.6243	19.4995	19.4995
725	10.8333	16.8999	21.0166	23.0744	15.9246	22.4244	19.8245	27.6243	19.8245	19.4995
726	11.05	17.1166	21.0166	22.7494	16.2496	22.0994	19.4995	27.9493	19.4995	19.4995
727	10.8333	16.8999	21.0166	23.0744	15.9246	22.0994	20.1495	27.9493	20.1495	19.4995
728	10.8333	16.6833	21.0166	22.7494	15.9246	22.0994	19.8245	27.6243	20.1495	19.1745
729	10.8333	16.6833	21.0166	23.0744	16.2496	22.0994	20.1495	27.2993	19.4995	19.1745
730	10.8333	16.8999	21.0166	23.0744	15.5996	22.0994	19.8245	27.9493	20.1495	19.1745
731	11.05	16.8999	21.0166	23.0744	15.5996	22.0994	19.8245	27.6243	20.1495	19.1745
732	10.6166	16.8999	21.0166	23.0744	15.9246	22.4244	20.1495	27.9493	19.4995	19.1745
733	10.4	16.4666	21.0166	23.0744	15.5996	22.0994	19.8245	27.6243	19.8245	19.1745
734	10.6166	16.4666	21.0166	22.7494	15.9246	22.7494	20.1495	27.2993	19.4995	19.4995
735	10.6166	16.4666	21.0166	23.0744	16.2496	22.0994	19.8245	27.9493	20.1495	19.4995
736	11.2666	16.6833	21.0166	22.7494	15.9246	22.4244	19.8245	27.6243	20.7995	19.4995
737	10.8333	16.8999	21.0166	23.0744	16.2496	22.4244	19.8245	27.6243	19.8245	19.4995
738	10.6166	16.6833	21.0166	22.7494	15.9246	22.0994	19.4995	27.2993	20.1495	19.1745
739	10.6166	16.6833	21.0166	23.0744	15.9246	21.7745	19.8245	27.9493	19.4995	19.4995
740	10.4	16.6833	21.0166	22.7494	15.9246	22.0994	20.1495	27.9493	20.1495	19.4995
741	10.8333	16.8999	21.0166	23.0744	16.2496	21.7745	20.1495	27.9493	19.4995	19.4995
742	10.6166	17.1166	21.0166	23.0744	15.9246	22.4244	20.4745	27.6243	19.8245	19.4995
743	10.8333	16.6833	21.0166	22.7494	15.9246	22.0994	19.8245	27.9493	20.1495	19.1745
744	10.8333	16.4666	21.2333	23.0744	15.5996	22.4244	19.8245	28.2743	20.1495	19.1745
745	10.8333	16.8999	21.0166	23.0744	15.9246	21.7745	19.8245	27.6243	19.4995	19.4995
746	10.6166	16.6833	21.0166	23.0744	15.9246	22.4244	19.8245	26.6493	19.4995	19.4995
747	10.6166	16.8999	21.0166	22.7494	16.2496	22.0994	19.8245	27.2993	19.8245	19.4995
748	11.05	16.8999	21.0166	22.7494	16.2496	22.7494	20.1495	27.2993	19.4995	19.4995
749	11.05	16.6833	21.4499	22.7494	16.2496	22.0994	19.8245	27.6243	19.8245	19.4995
750	10.4	16.6833	21.0166	22.7494	15.9246	22.0994	20.1495	26.6493	20.1495	19.4995
751	11.05	16.8999	21.0166	22.7494	15.9246	22.0994	19.8245	27.2993	20.1495	19.4995
752	11.05	16.6833	21.0166	22.7494	16.2496	21.7745	20.1495	27.2993	20.1495	19.4995
753	10.4	16.6833	21.2333	22.7494	16.2496	22.0994	20.1495	27.2993	20.1495	19.1745
754	10.8333	16.8999	21.0166	22.4244	15.9246	21.4495	19.8245	27.6243	20.1495	19.4995
755	10.8333	16.6833	21.0166	22.7494	16.2496	22.0994	19.4995	27.2993	20.1495	19.4995
756	10.6166	16.4666	21.0166	22.7494	15.9246	22.0994	20.1495	27.6243	19.8245	19.1745
757	11.05	16.2499	21.0166	22.7494	16.2496	21.7745	19.8245	27.6243	19.8245	19.8245
758	10.8333	16.4666	21.0166	22.7494	16.2496	22.0994	19.8245	27.2993	19.8245	19.4995
759	10.8333	16.6833	21.0166	22.7494	16.5746	22.0994	20.1495	27.2993	19.8245	19.4995
760	10.8333	16.6833	21.0166	22.7494	16.2496	21.7745	19.8245	27.6243	19.8245	19.4995
761	10.8333	16.8999	21.2333	22.4244	16.2496	22.4244	19.8245	27.2993	19.4995	19.1745
762	10.8333	16.4666	21.0166	22.4244	16.5746	22.0994	19.8245	27.6243	20.1495	19.4995
763	11.05	16.4666	21.2333	22.7494	16.2496	22.4244	20.1495	27.2993	19.4995	19.1745
764	10.6166	16.4666	21.0166	22.7494	15.9246	22.0994	19.8245	27.6243	19.4995	19.4995
765	11.05	16.6833	21.2333	22.7494	16.2496	21.7745	20.1495	27.6243	20.1495	19.8245
766	10.4	16.4666	21.0166	22.4244	15.9246	21.7745	19.8245	27.6243	20.1495	19.1745
767	10.8333	16.6833	21.0166	22.7494	15.9246	22.0994	20.1495	27.2993	19.8245	19.1745
768	10.6166	16.4666	21.0166	22.7494	15.5996	22.0994	19.8245	26.9743	20.1495	19.4995
769	11.05	16.4666	21.0166	22.7494	15.9246	22.0994	19.8245	27.2993	19.8245	19.4995
770	10.4	16.6833	21.0166	22.7494	16.2496	21.7745	20.1495	27.6243	20.1495	19.4995
771	10.6166	16.4666	21.2333	22.7494	15.9246	22.0994	19.8245	27.9493	19.8245	19.8245
772	10.6166	16.8999	21.0166	22.7494	16.2496	22.0994	19.8245	27.9493	19.8245	19.8245
773	10.4	16.6833	21.0166	22.4244	15.9246	22.0994	19.4995	27.9493	19.8245	19.4995
774	10.8333	16.6833	21.2333	22.7494	15.9246	22.0994	20.1495	27.2993	20.1495	19.4995
775	11.2666	16.4666	21.0166	22.4244	16.2496	22.0994	20.1495	27.2993	19.4995	19.4995
776	10.8333	16.4666	21.2333	22.4244	16.2496	22.0994	19.8245	27.6243	19.8245	19.4995
777	11.05	16.2499	21.0166	22.4244	16.2496	22.0994	19.4995	27.6243	19.4995	19.1745
778	11.05	16.8999	21.0166	22.7494	16.2496	22.0994	19.1745	26.9743	19.8245	19.4995
779	11.05	16.6833	21.0166	22.7494	16.2496	22.0994	19.1745	27.6243	19.4995	19.1745
780	10.8333	16.4666	21.0166	22.7494	15.9246	22.0994	19.1745	27.9493	19.8245	19.4995
781	10.6166	16.6833	21.0166	22.7494	16.2496	21.7745	19.1745	28.2743	19.8245	19.4995
782	11.05	16.4666	20.7999	22.7494	16.2496	21.7745	19.1745	27.6243	19.1745	19.4995
783	10.8333	16.4666	21.0166	22.7494	16.2496	22.0994	18.8495	27.2993	19.1745	19.1745
784	10.6166	16.8999	21.0166	22.4244	16.8996	22.0994	19.1745	27.6243	19.8245	19.4995
785	10.8333	17.1166	21.0166	22.7494	16.2496	21.7745	19.1745	27.9493	18.8495	19.1745
786	10.8333	16.8999	21.0166	22.7494	16.2496	22.4244	19.4995	27.2993	19.8245	19.1745
787	10.6166	16.6833	20.7999	22.7494	16.2496	22.0994	18.8495	27.6243	19.8245	19.1745
788	10.4	16.8999	21.0166	22.7494	16.5746	22.0994	19.4995	27.2993	19.8245	19.4995
789	10.6166	16.8999	21.0166	22.7494	16.5746	22.4244	19.8245	26.9743	19.8245	19.1745
790	10.4	16.6833	21.2333	22.4244	16.8996	22.0994	20.1495	27.2993	19.8245	19.4995
791	10.1833	16.4666	21.0166	22.4244	16.2496	22.4244	19.8245	26.9743	20.1495	19.4995
792	10.6166	16.4666	21.2333	22.4244	16.8996	22.0994	19.8245	27.2993	19.4995	19.4995
793	10.4	16.6833	21.0166	22.7494	16.8996	21.7745	19.8245	27.2993	19.8245	19.1745
794	10.6166	16.8999	21.0166	22.7494	16.8996	22.0994	20.4745	27.2993	19.1745	19.4995
795	10.6166	16.6833	21.0166	22.7494	16.5746	22.4244	20.1495	27.6243	19.8245	19.4995
796	11.05	16.4666	21.0166	22.4244	16.8996	21.7745	19.8245	27.2993	19.4995	19.4995
797	10.6166	16.6833	21.0166	22.7494	16.5746	21.7745	19.8245	26.9743	19.4995	19.4995
798	11.05	16.6833	21.2333	22.7494	16.5746	22.0994	20.7995	27.2993	19.4995	19.1745
799	10.6166	16.6833	21.0166	22.7494	16.2496	22.0994	20.1495	27.2993	19.4995	19.4995
800	10.6166	16.8999	21.0166	22.7494	16.5746	22.4244	20.7995	27.2993	19.8245	19.4995
801	10.4	16.4666	21.0166	22.4244	16.8996	22.0994	20.1495	27.6243	19.4995	19.4995
802	10.6166	16.6833	21.2333	22.4244	16.8996	22.4244	20.4745	27.6243	19.4995	19.4995
803	10.4	16.8999	21.0166	22.4244	16.8996	22.4244	20.1495	27.6243	19.8245	19.4995
804	10.6166	16.6833	21.2333	22.7494	16.5746	22.0994	20.4745	27.2993	19.8245	19.4995
805	10.8333	16.6833	21.0166	22.7494	16.5746	22.0994	19.8245	27.2993	19.4995	19.1745
806	10.6166	16.6833	21.2333	22.7494	16.8996	22.7494	20.4745	26.9743	19.1745	19.4995
807	10.4	16.6833	20.7999	22.7494	16.8996	22.0994	20.4745	27.2993	19.8245	19.1745
808	10.4	16.2499	20.7999	22.7494	16.8996	22.0994	20.1495	27.2993	20.1495	19.1745
809	10.6166	16.6833	20.7999	22.7494	16.8996	22.7494	20.1495	26.9743	19.8245	19.1745
810	10.6166	16.4666	20.7999	22.4244	16.8996	22.4244	20.4745	27.6243	19.8245	19.4995
811	10.6166	16.6833	21.0166	22.4244	16.8996	22.4244	20.1495	26.6493	19.8245	19.1745
812	10.4	16.4666	21.0166	22.4244	16.8996	22.4244	19.8245	26.9743	19.4995	18.8495
813	10.6166	16.4666	21.0166	22.4244	17.2246	22.4244	20.7995	26.9743	19.8245	18.8495
814	10.4	16.4666	21.2333	22.4244	16.2496	22.4244	19.8245	26.9743	19.4995	19.1745
815	10.6166	16.8999	21.2333	22.4244	16.8996	22.0994	19.8245	27.6243	19.4995	19.4995
816	10.1833	16.6833	21.0166	22.7494	16.8996	22.0994	20.1495	27.9493	19.4995	19.4995
817	10.1833	16.4666	21.0166	22.7494	16.8996	22.0994	20.1495	27.6243	20.1495	19.1745
818	10.4	16.6833	21.2333	22.4244	16.2496	22.4244	20.4745	27.2993	20.4745	19.1745
819	10.8333	16.4666	21.0166	22.4244	16.8996	22.4244	19.8245	27.2993	19.8245	19.1745
820	10.4	16.4666	21.0166	22.4244	16.5746	22.4244	20.1495	27.2993	19.4995	19.8245
821	9.74997	16.2499	21.0166	22.4244	16.8996	22.4244	20.4745	27.2993	19.4995	19.1745
822	10.4	16.4666	21.2333	22.4244	16.8996	22.4244	20.4745	27.2993	19.1745	19.4995
823	10.4	16.4666	21.0166	22.4244	17.2246	22.4244	20.4745	27.6243	19.8245	19.1745
824	10.6166	16.2499	21.2333	22.4244	16.8996	22.4244	19.8245	27.6243	19.8245	19.4995
825	10.6166	16.4666	21.2333	22.4244	16.5746	22.4244	19.8245	27.6243	19.8245	19.8245
826	10.4	16.2499	21.2333	22.7494	16.8996	22.4244	20.4745	27.2993	19.8245	19.1745
827	10.1833	16.4666	21.2333	22.4244	16.8996	22.7494	20.1495	26.9743	19.4995	19.1745
828	10.4	16.2499	21.0166	22.4244	17.2246	22.4244	20.1495	26.9743	19.4995	19.4995
829	10.4	16.4666	21.0166	22.7494	16.8996	22.4244	20.1495	26.9743	19.1745	19.4995
830	10.4	16.2499	21.2333	22.7494	16.8996	22.7494	20.4745	27.2993	19.1745	19.4995
831	10.1833	16.2499	21.0166	22.7494	16.8996	22.7494	19.8245	27.2993	19.4995	19.1745
832	10.4	16.6833	21.2333	22.7494	16.8996	22.7494	20.4745	27.6243	19.4995	19.4995
833	10.4	16.2499	21.2333	22.7494	16.8996	22.0994	20.7995	26.9743	19.1745	19.4995
834	10.1833	16.6833	21.2333	22.4244	16.8996	22.4244	20.1495	27.6243	19.1745	19.4995
835	10.4	16.6833	21.0166	22.4244	16.8996	22.4244	20.4745	27.2993	19.4995	19.4995
836	10.8333	16.8999	21.2333	22.4244	16.8996	22.4244	19.8245	27.6243	19.1745	19.4995
837	10.1833	16.8999	21.2333	22.4244	16.8996	22.4244	20.4745	27.2993	19.8245	19.1745
838	10.6166	16.8999	21.2333	22.4244	16.8996	22.4244	20.4745	27.9493	19.1745	19.4995
839	10.4	16.4666	21.4499	22.4244	16.8996	22.7494	20.4745	27.2993	19.8245	19.8245
840	10.4	16.6833	21.4499	22.4244	16.8996	22.7494	20.7995	26.6493	19.8245	19.8245
841	10.6166	16.6833	21.4499	22.4244	16.8996	22.7494	20.1495	27.2993	19.4995	20.1495
842	10.6166	16.4666	21.4499	22.4244	16.8996	22.4244	20.4745	27.2993	19.4995	19.8245
843	10.4	16.4666	21.4499	22.4244	16.8996	23.0744	20.1495	27.6243	19.4995	19.8245
844	10.6166	16.8999	21.2333	22.4244	16.8996	22.4244	20.4745	27.6243	19.4995	19.8245
845	9.96663	16.6833	21.2333	22.4244	16.8996	22.4244	20.4745	27.9493	19.1745	19.4995
846	10.6166	16.4666	21.4499	22.4244	16.8996	22.7494	20.4745	27.2993	19.4995	19.8245
847	10.6166	16.6833	21.6666	22.4244	16.8996	22.4244	20.1495	27.2993	19.4995	19.1745
848	10.4	16.8999	21.6666	22.7494	16.8996	22.7494	20.4745	26.9743	19.4995	19.4995
849	10.6166	16.6833	21.6666	22.4244	16.8996	22.7494	20.4745	27.2993	19.8245	19.4995
850	10.1833	16.6833	21.0166	22.4244	16.5746	22.7494	20.4745	27.6243	20.1495	19.4995
851	10.1833	16.8999	21.4499	22.4244	16.8996	22.7494	20.1495	27.6243	19.4995	19.4995
852	10.8333	16.8999	21.4499	22.7494	16.8996	22.0994	20.4745	27.2993	20.1495	19.4995
853	10.4	16.6833	21.2333	22.4244	16.8996	22.4244	20.1495	27.9493	19.4995	19.4995
854	10.6166	16.6833	21.6666	22.7494	16.8996	22.4244	20.1495	27.9493	19.4995	19.8245
855	10.6166	16.6833	21.4499	22.7494	16.5746	22.4244	20.4745	27.9493	19.4995	19.8245
856	10.4	16.6833	21.4499	22.7494	16.5746	22.4244	20.1495	27.9493	20.1495	19.4995
857	10.4	16.4666	21.2333	22.7494	16.8996	22.4244	20.1495	27.6243	19.8245	19.8245
858	10.6166	16.4666	21.4499	22.7494	16.8996	22.4244	20.4745	27.2993	19.1745	19.8245
859	10.6166	16.6833	21.2333	22.7494	16.8996	22.4244	20.4745	27.2993	19.8245	19.8245
860	10.6166	16.6833	21.4499	22.7494	16.5746	22.0994	20.1495	27.2993	20.1495	20.1495
861	10.4	16.6833	21.4499	22.4244	16.8996	22.4244	20.4745	27.9493	20.1495	19.8245
862	10.8333	16.6833	21.4499	22.4244	16.8996	22.0994	20.1495	27.9493	19.4995	19.8245
863	10.1833	16.6833	21.4499	22.7494	16.5746	22.7494	20.1495	27.9493	19.4995	20.1495
864	10.8333	16.6833	21.4499	22.7494	16.5746	22.7494	20.4745	27.6243	20.1495	19.8245
865	10.8333	16.8999	21.4499	22.7494	16.5746	23.0744	20.4745	27.9493	20.1495	19.4995
866	10.4	16.8999	21.4499	22.7494	16.5746	22.4244	20.4745	27.6243	20.1495	19.8245
867	10.4	16.4666	21.2333	22.4244	16.5746	22.4244	20.1495	27.9493	20.4745	19.8245
868	10.8333	16.8999	21.2333	22.4244	16.5746	22.0994	20.4745	27.6243	20.4745	19.4995
869	10.6166	16.6833	21.2333	22.4244	16.2496	22.7494	19.8245	27.9493	20.1495	19.8245
870	10.8333	16.4666	21.0166	22.7494	16.2496	22.4244	20.4745	27.9493	19.8245	19.4995
871	11.05	16.6833	21.0166	22.7494	16.8996	22.0994	20.4745	27.6243	20.1495	19.8245
872	10.4	16.6833	20.7999	22.7494	16.8996	22.0994	20.1495	27.6243	19.4995	20.1495
873	10.6166	16.6833	21.2333	22.7494	16.8996	22.0994	20.1495	27.6243	19.8245	20.1495
874	10.4	16.6833	21.0166	22.4244	16.5746	22.4244	20.4745	27.6243	19.8245	19.4995
875	10.8333	16.6833	21.2333	22.7494	16.5746	22.4244	20.4745	27.6243	19.4995	20.1495
876	10.6166	16.4666	21.0166	22.7494	16.5746	22.0994	20.1495	27.6243	19.8245	19.4995
877	10.4	16.6833	21.2333	22.7494	16.5746	22.0994	20.1495	26.9743	19.1745	19.8245
878	10.4	16.4666	21.0166	22.7494	16.5746	22.0994	20.1495	27.6243	20.1495	19.8245
879	10.6166	16.6833	21.0166	22.7494	16.2496	22.4244	19.8245	27.6243	19.4995	19.8245
880	10.6166	16.8999	20.7999	22.7494	16.2496	22.4244	20.4745	27.2993	19.4995	20.1495
881	11.05	16.4666	20.7999	22.7494	16.5746	22.0994	19.8245	26.9743	19.8245	19.4995
882	10.6166	16.4666	21.0166	22.4244	15.9246	22.7494	20.4745	26.9743	19.1745	19.1745
883	10.6166	16.6833	20.7999	22.7494	16.2496	22.0994	20.1495	27.9493	19.1745	19.1745
884	10.6166	16.2499	20.7999	22.7494	16.5746	22.0994	19.8245	27.2993	19.1745	19.1745
885	10.6166	16.6833	20.7999	22.4244	16.5746	22.4244	20.4745	27.9493	19.4995	19.4995
886	10.6166	16.4666	21.0166	22.7494	16.5746	22.4244	19.8245	27.9493	19.1745	19.8245
887	10.8333	16.6833	20.5833	22.7494	16.5746	22.0994	20.1495	27.6243	20.1495	19.4995
888	10.4	16.4666	20.7999	22.7494	16.2496	21.7745	19.8245	27.9493	19.8245	19.4995
889	10.6166	16.6833	20.7999	22.4244	16.5746	22.0994	20.4745	27.6243	19.4995	19.8245
890	10.4	16.4666	20.7999	22.0994	16.5746	22.0994	20.4745	27.6243	19.4995	19.4995
891	10.8333	16.4666	20.5833	22.4244	16.8996	22.0994	20.1495	27.2993	19.4995	19.4995
892	10.6166	16.6833	20.5833	22.4244	16.2496	22.0994	20.1495	27.2993	19.8245	19.8245
893	10.8333	16.2499	20.5833	22.7494	16.5746	22.7494	20.4745	27.2993	19.8245	20.1495
894	10.4	16.2499	20.7999	22.4244	16.2496	22.0994	20.4745	27.6243	19.4995	19.8245
895	10.8333	16.4666	20.7999	22.7494	16.2496	21.7745	20.4745	27.9493	19.1745	19.1745
896	10.6166	16.2499	21.0166	22.4244	16.8996	22.0994	20.7995	27.6243	19.8245	19.4995
897	10.8333	16.0333	20.7999	22.7494	16.8996	21.7745	20.4745	27.6243	19.4995	19.4995
898	10.4	16.4666	20.5833	22.4244	16.2496	22.0994	20.1495	27.6243	20.1495	19.8245
899	10.6166	16.8999	20.5833	22.4244	16.2496	22.0994	20.1495	27.2993	19.4995	19.8245
900	10.6166	16.6833	20.7999	22.7494	16.2496	22.4244	20.1495	27.6243	19.8245	19.8245
901	10.4	16.4666	21.2333	22.4244	16.2496	22.4244	19.8245	27.6243	20.1495	19.4995
902	10.8333	16.8999	21.2333	22.4244	16.5746	22.4244	20.4745	26.9743	19.8245	19.8245
903	10.6166	16.4666	20.5833	22.7494	16.2496	22.4244	20.4745	27.6243	20.1495	19.4995
904	10.6166	16.6833	21.0166	22.7494	16.2496	22.7494	19.8245	27.9493	19.1745	19.8245
905	10.4	16.8999	21.0166	22.7494	16.2496	21.7745	20.4745	26.9743	19.4995	19.8245
906	10.6166	16.6833	20.7999	22.7494	16.5746	22.0994	19.8245	27.6243	19.8245	19.4995
907	10.4	16.6833	21.0166	22.7494	16.2496	22.0994	20.1495	26.6493	20.1495	19.1745
908	10.6166	16.6833	21.0166	22.0994	16.2496	22.4244	20.1495	26.6493	19.1745	19.8245
909	10.8333	16.6833	20.7999	22.4244	16.5746	22.4244	19.8245	27.6243	19.4995	19.8245
910	10.8333	16.4666	20.7999	22.4244	16.2496	22.4244	19.8245	27.6243	19.8245	19.4995
911	10.6166	16.6833	21.2333	22.4244	16.2496	22.0994	19.8245	27.2993	20.1495	19.4995
912	10.6166	16.6833	21.2333	22.4244	16.2496	22.0994	20.4745	27.2993	20.1495	19.4995
913	10.6166	16.8999	21.2333	22.4244	16.5746	22.4244	19.8245	27.2993	19.8245	19.8245
914	10.6166	16.6833	21.0166	22.4244	16.2496	22.4244	19.8245	27.2993	20.1495	19.4995
915	10.6166	16.6833	20.7999	22.4244	16.2496	22.0994	20.1495	26.9743	19.4995	19.8245
916	10.6166	16.6833	20.7999	22.4244	16.2496	21.7745	20.4745	27.6243	19.8245	20.1495
917	10.4	16.6833	21.2333	22.7494	16.2496	22.0994	20.4745	27.6243	19.4995	19.1745
918	10.8333	16.8999	21.2333	22.4244	16.2496	22.0994	20.4745	27.9493	19.4995	19.8245
919	10.4	16.6833	21.0166	22.4244	16.5746	22.0994	19.4995	27.9493	19.4995	19.4995
920	10.6166	16.4666	20.7999	22.4244	16.5746	22.0994	19.8245	27.6243	19.8245	19.8245
921	10.1833	16.8999	21.2333	22.4244	16.2496	21.7745	19.4995	27.6243	19.8245	19.8245
922	10.4	16.4666	20.7999	22.4244	16.5746	21.7745	19.8245	27.6243	20.1495	19.8245
923	10.4	16.6833	21.2333	22.4244	16.2496	22.0994	19.1745	27.2993	20.1495	19.4995
924	10.4	16.4666	21.2333	22.4244	16.2496	21.7745	19.8245	26.9743	19.4995	19.4995
925	10.4	16.6833	21.0166	22.4244	16.5746	22.0994	19.8245	27.6243	20.1495	19.4995
926	10.6166	16.6833	21.0166	22.4244	16.5746	21.7745	19.8245	27.6243	20.1495	20.1495
927	10.4	16.2499	21.0166	22.4244	16.5746	21.4495	20.1495	27.2993	19.4995	19.8245
928	10.4	16.4666	21.2333	22.4244	16.2496	22.0994	19.4995	27.6243	19.8245	19.8245
929	10.4	16.4666	21.0166	22.4244	16.5746	22.0994	20.4745	27.6243	19.8245	19.4995
930	10.1833	16.0333	21.0166	22.4244	16.5746	22.0994	19.4995	27.6243	20.1495	19.8245
931	10.1833	16.2499	21.0166	22.0994	16.5746	21.7745	19.4995	27.2993	19.4995	20.1495
932	10.1833	16.4666	21.0166	22.4244	16.8996	21.7745	19.1745	27.2993	19.4995	19.8245
933	10.6166	16.4666	21.0166	22.4244	16.2496	22.4244	19.8245	27.2993	19.4995	20.1495
934	10.8333	16.6833	21.0166	22.4244	16.5746	22.4244	19.8245	27.9493	20.1495	19.8245
935	10.6166	16.2499	20.7999	22.4244	16.5746	22.0994	19.4995	27.2993	20.4745	20.1495
936	10.1833	16.6833	21.0166	22.0994	16.5746	22.0994	19.4995	28.2743	19.4995	19.8245
937	10.4	16.4666	21.0166	22.4244	16.5746	22.0994	19.1745	27.2993	20.1495	19.8245
938	10.6166	16.4666	21.0166	22.4244	16.2496	22.4244	19.8245	27.2993	20.1495	19.8245
939	10.6166	16.2499	20.7999	22.7494	16.2496	22.4244	19.4995	27.2993	20.1495	19.4995
940	10.4	16.2499	20.7999	22.4244	16.5746	22.0994	19.8245	27.6243	19.8245	19.8245
941	10.4	16.4666	20.7999	22.7494	16.5746	22.4244	20.1495	27.9493	19.4995	19.8245
942	10.4	16.4666	21.0166	22.7494	16.5746	22.4244	19.8245	27.9493	19.8245	19.8245
943	10.4	16.4666	21.0166	22.7494	16.5746	22.4244	19.4995	27.6243	19.8245	19.4995
944	10.6166	16.6833	21.0166	23.0744	16.2496	22.4244	19.8245	28.2743	19.8245	19.8245
945	10.8333	16.4666	21.0166	22.7494	16.5746	22.4244	19.8245	27.6243	19.8245	19.4995
946	10.4	16.4666	20.7999	22.7494	15.9246	22.4244	19.8245	27.2993	20.1495	19.4995
947	10.6166	16.6833	21.0166	23.0744	16.2496	22.4244	19.4995	27.6243	19.8245	19.4995
948	10.1833	16.6833	21.0166	23.0744	16.2496	22.7494	19.8245	28.2743	19.4995	19.4995
949	10.8333	16.4666	21.0166	22.7494	15.9246	22.4244	19.8245	26.9743	20.1495	19.4995
950	10.4	16.2499	21.2333	23.0744	16.2496	22.4244	19.8245	27.2993	19.4995	19.4995
951	10.6166	16.2499	21.0166	23.0744	16.2496	22.4244	19.8245	26.9743	19.8245	19.4995
952	10.4	16.4666	21.0166	22.7494	16.5746	22.4244	19.8245	27.9493	19.4995	19.8245
953	10.6166	16.4666	21.0166	22.7494	16.5746	22.4244	19.4995	27.6243	19.4995	19.1745
954	10.1833	16.2499	21.0166	23.0744	16.2496	22.4244	19.8245	27.6243	19.4995	19.4995
955	10.1833	16.4666	21.0166	23.0744	16.2496	22.4244	20.1495	27.2993	20.1495	19.4995
956	10.6166	16.0333	20.7999	23.0744	16.2496	22.0994	19.4995	27.6243	19.1745	19.4995
957	10.1833	16.4666	20.7999	22.7494	16.2496	22.4244	20.1495	27.6243	19.8245	19.4995
958	10.4	16.2499	20.7999	23.0744	16.2496	22.4244	20.1495	26.9743	19.8245	19.8245
959	10.6166	16.2499	21.2333	23.0744	15.5996	23.0744	19.8245	26.9743	20.1495	19.8245
960	11.05	16.6833	21.0166	22.7494	16.2496	23.0744	19.4995	27.6243	19.8245	19.8245
961	10.1833	16.4666	21.0166	23.0744	16.2496	22.7494	19.8245	27.2993	20.1495	19.1745
962	10.4	16.4666	20.7999	23.0744	15.5996	22.4244	19.1745	27.6243	19.8245	19.4995
963	10.1833	16.4666	20.7999	23.0744	15.2746	22.4244	19.4995	26.9743	20.1495	19.4995
964	10.4	16.4666	21.0166	23.0744	15.9246	22.4244	19.8245	27.2993	20.1495	19.4995
965	10.6166	16.2499	21.2333	22.7494	15.9246	22.4244	19.1745	27.9493	19.4995	20.1495
966	10.6166	16.4666	21.2333	22.7494	16.2496	22.4244	20.1495	27.2993	19.8245	19.4995
967	10.4	16.2499	21.0166	23.0744	15.9246	22.4244	19.8245	27.6243	19.8245	19.8245
968	10.8333	16.6833	21.0166	22.7494	16.2496	22.4244	19.8245	27.2993	19.8245	19.4995
969	10.6166	16.4666	21.0166	23.0744	16.2496	22.4244	19.8245	27.9493	19.4995	19.8245
970	10.6166	16.2499	21.0166	23.0744	16.5746	22.4244	20.1495	26.9743	20.1495	19.8245
971	10.6166	16.0333	21.0166	22.7494	15.9246	22.7494	19.8245	27.9493	20.4745	19.4995
972	10.4	16.2499	21.2333	23.0744	15.5996	22.7494	19.4995	27.9493	20.1495	19.8245
973	10.6166	16.2499	21.2333	22.7494	15.5996	22.7494	19.8245	27.6243	19.8245	19.8245
974	10.6166	16.4666	21.2333	22.7494	15.9246	22.7494	19.4995	27.6243	20.1495	19.8245
975	10.6166	16.4666	21.2333	23.0744	15.9246	22.4244	19.4995	26.9743	20.1495	19.8245
976	10.4	16.4666	21.2333	22.7494	15.9246	22.4244	19.8245	27.9493	19.8245	20.1495
977	10.6166	16.4666	21.0166	23.0744	15.9246	22.7494	19.8245	27.9493	20.1495	19.8245
978	10.4	16.2499	20.7999	23.0744	16.2496	22.7494	19.8245	27.6243	19.8245	19.8245
979	10.1833	16.4666	21.0166	23.0744	16.5746	22.7494	19.8245	27.6243	20.4745	19.4995
980	10.1833	16.4666	21.2333	22.7494	15.9246	22.4244	19.4995	27.2993	20.1495	19.8245
981	10.4	16.4666	21.0166	22.7494	15.9246	22.7494	20.1495	27.6243	20.1495	19.8245
982	10.8333	16.2499	21.0166	23.0744	15.9246	22.4244	20.1495	28.2743	20.1495	19.8245
983	10.4	16.6833	21.2333	23.0744	15.9246	22.0994	19.8245	27.9493	20.1495	19.8245
984	10.8333	16.4666	20.7999	22.7494	15.5996	22.4244	19.8245	27.9493	20.7995	19.8245
985	9.96663	16.2499	21.0166	22.7494	15.9246	22.7494	19.4995	27.2993	20.1495	19.4995
986	11.05	16.8999	21.2333	23.0744	15.5996	22.4244	20.4745	27.2993	20.1495	19.4995
987	10.1833	16.6833	21.0166	23.0744	15.9246	22.4244	19.8245	27.9493	20.7995	19.4995
988	10.6166	16.6833	21.0166	22.7494	15.5996	22.4244	19.8245	27.6243	20.7995	19.8245
989	10.6166	16.4666	21.0166	23.0744	15.9246	22.0994	19.4995	27.6243	20.4745	19.4995
990	10.1833	16.8999	21.0166	23.0744	15.2746	22.7494	19.4995	27.6243	21.1245	20.4745
991	9.96663	16.4666	21.0166	23.0744	15.5996	22.4244	20.1495	27.9493	20.7995	19.8245
992	10.1833	16.6833	21.0166	22.7494	15.9246	22.7494	20.1495	27.2993	20.4745	20.1495
993	10.4	16.2499	21.2333	23.0744	15.5996	22.4244	20.1495	27.6243	19.8245	20.1495
994	10.1833	16.6833	21.2333	22.7494	15.9246	22.7494	19.8245	27.9493	20.7995	19.8245
995	10.4	16.2499	21.2333	23.0744	15.9246	22.7494	19.8245	27.9493	21.4495	19.8245
996	10.4	16.2499	21.2333	23.0744	15.9246	22.7494	20.1495	28.2743	19.8245	19.8245
997	10.1833	16.6833	21.0166	22.7494	15.9246	22.7494	19.8245	27.6243	20.4745	19.8245
998	10.4	16.6833	21.2333	23.0744	15.9246	22.7494	18.8495	27.2993	20.1495	19.8245
999	9.96663	16.8999	21.2333	22.7494	16.2496	23.0744	19.4995	27.6243	20.4745	20.1495
1000	10.1833	16.4666	21.2333	22.7494	15.9246	22.7494	19.8245	27.2993	20.1495	20.4745
1001	10.4	16.8999	21.0166	22.7494	16.2496	22.4244	19.8245	27.6243	20.4745	20.1495
1002	10.6166	16.6833	21.0166	23.0744	16.2496	22.7494	19.8245	27.6243	20.1495	19.8245
1003	9.96663	16.8999	21.0166	23.0744	15.9246	22.7494	20.4745	27.6243	20.4745	19.4995
1004	10.6166	17.1166	21.2333	23.0744	15.9246	22.7494	19.8245	27.9493	20.1495	19.4995
1005	10.4	16.8999	21.2333	22.7494	15.9246	22.7494	19.8245	27.6243	20.1495	19.8245
1006	10.1833	16.8999	21.0166	22.7494	15.9246	22.0994	19.4995	27.9493	20.1495	19.8245
1007	10.4	17.1166	21.0166	22.7494	15.9246	22.7494	19.8245	27.2993	20.1495	19.8245
1008	10.4	16.8999	21.0166	23.0744	15.9246	22.4244	19.8245	27.6243	20.1495	19.8245
1009	10.8333	16.4666	21.0166	22.7494	16.2496	22.4244	19.4995	27.9493	20.1495	19.8245
1010	10.1833	17.1166	20.7999	23.0744	15.9246	22.7494	18.8495	27.9493	20.4745	20.1495
1011	10.4	16.6833	20.7999	22.7494	16.2496	22.0994	19.8245	27.9493	21.4495	19.8245
1012	10.6166	16.8999	21.2333	23.0744	16.5746	22.4244	19.8245	27.6243	20.4745	20.1495
1013	10.4	16.6833	20.7999	23.0744	16.2496	22.4244	19.1745	27.6243	20.4745	19.8245
1014	10.1833	16.8999	21.0166	22.7494	16.2496	22.0994	19.4995	27.6243	21.1245	19.8245
1015	10.1833	16.8999	20.7999	23.0744	15.9246	22.4244	19.4995	27.9493	20.4745	19.8245
1016	10.6166	17.1166	21.0166	22.7494	16.2496	22.4244	20.1495	26.9743	20.7995	19.8245
1017	10.6166	16.6833	20.7999	22.7494	16.2496	22.0994	19.4995	27.6243	20.1495	19.8245
1018	10.4	16.6833	21.2333	22.7494	16.2496	22.4244	19.4995	27.6243	21.1245	19.8245
1019	10.6166	16.4666	21.0166	22.7494	16.2496	22.4244	19.4995	27.9493	21.1245	19.4995
1020	10.1833	16.6833	20.7999	22.7494	16.2496	22.0994	19.8245	27.6243	20.4745	19.8245
1021	10.6166	16.4666	21.0166	22.7494	16.2496	22.0994	20.1495	27.6243	20.7995	19.4995
1022	10.4	16.6833	20.7999	22.7494	15.9246	22.7494	19.8245	27.9493	20.4745	20.4745
1023	10.4	16.6833	21.0166	23.0744	16.5746	22.0994	20.1495	27.9493	21.1245	19.4995
1024	10.1833	16.4666	21.0166	23.0744	16.5746	21.7745	19.8245	27.9493	20.4745	19.8245
1025	10.4	16.4666	20.5833	23.0744	16.5746	22.0994	19.8245	27.9493	20.7995	19.8245
1026	10.1833	16.4666	21.0166	22.7494	16.5746	22.0994	19.8245	27.2993	20.4745	19.8245
1027	10.1833	16.4666	20.7999	22.7494	16.5746	22.0994	19.4995	27.6243	20.4745	20.1495
1028	11.05	16.4666	21.0166	22.7494	16.2496	22.4244	19.4995	27.2993	20.4745	19.8245
1029	10.4	16.6833	20.7999	23.0744	16.2496	22.0994	19.8245	27.6243	20.4745	19.8245
1030	10.6166	16.4666	20.7999	22.7494	16.5746	22.0994	19.8245	27.9493	20.7995	19.8245
1031	10.4	16.6833	21.0166	23.0744	16.5746	22.0994	20.1495	27.6243	20.7995	19.8245
1032	10.1833	16.4666	21.0166	22.7494	16.5746	21.7745	19.8245	27.6243	21.1245	19.8245
1033	10.4	16.6833	20.7999	22.7494	16.5746	22.0994	19.8245	27.6243	20.4745	20.1495
1034	10.6166	16.6833	21.0166	23.0744	16.5746	22.0994	19.4995	27.9493	20.1495	20.1495
1035	9.96663	16.6833	20.7999	23.0744	16.5746	21.7745	20.1495	27.6243	20.7995	19.4995
1036	10.1833	16.4666	20.7999	22.7494	16.5746	22.0994	19.8245	26.9743	20.4745	19.8245
1037	10.6166	16.8999	20.7999	22.7494	16.5746	22.0994	20.1495	27.6243	20.1495	20.1495
1038	10.1833	16.6833	21.0166	23.0744	16.5746	22.0994	19.1745	27.6243	20.4745	20.1495
1039	10.6166	16.4666	20.7999	22.7494	16.5746	22.0994	19.8245	27.9493	20.4745	19.8245
1040	10.1833	16.4666	21.2333	23.0744	16.2496	22.4244	19.4995	27.9493	20.4745	20.1495
1041	10.6166	16.4666	21.0166	22.7494	16.2496	22.0994	19.8245	27.9493	20.4745	20.1495
1042	10.6166	16.8999	21.0166	23.0744	16.5746	22.0994	19.4995	27.9493	19.8245	19.8245
1043	10.8333	16.4666	20.7999	23.0744	16.5746	22.0994	20.1495	27.9493	20.4745	20.1495
1044	10.8333	16.4666	20.7999	22.7494	16.5746	22.0994	19.4995	27.2993	19.8245	19.8245
1045	10.8333	16.8999	20.7999	22.7494	16.5746	22.4244	19.4995	27.6243	20.7995	19.8245
1046	10.4	16.4666	20.7999	23.0744	16.5746	22.4244	20.1495	27.9493	20.1495	19.8245
1047	10.8333	16.8999	20.7999	22.7494	16.5746	22.0994	19.4995	27.9493	20.4745	19.8245
1048	10.8333	16.6833	20.7999	22.7494	16.5746	22.4244	19.8245	27.6243	19.8245	19.8245
1049	10.8333	16.8999	20.7999	22.7494	16.2496	22.0994	19.4995	27.6243	20.1495	19.8245
1050	10.4	16.6833	21.0166	23.0744	15.9246	21.7745	19.4995	27.2993	20.1495	19.8245
1051	10.6166	16.6833	20.7999	22.7494	16.2496	22.7494	19.8245	27.9493	20.4745	20.1495
1052	10.6166	16.6833	20.5833	23.0744	15.9246	22.0994	19.4995	27.2993	20.4745	19.8245
1053	10.6166	17.1166	21.0166	22.7494	16.2496	21.7745	19.8245	27.6243	20.1495	20.1495
1054	10.1833	16.8999	21.0166	22.7494	16.2496	22.4244	19.8245	27.6243	20.1495	20.1495
1055	10.6166	16.4666	20.7999	22.7494	15.9246	21.7745	19.8245	27.6243	20.7995	20.1495
1056	10.8333	16.6833	21.0166	22.7494	16.2496	21.7745	19.8245	27.6243	20.1495	20.4745
1057	10.4	16.8999	20.7999	22.7494	16.2496	22.4244	19.8245	27.9493	20.4745	20.1495
1058	10.6166	16.4666	20.7999	22.7494	15.9246	22.0994	19.8245	27.6243	20.7995	20.1495
1059	10.8333	16.4666	20.5833	22.7494	16.5746	21.7745	19.8245	27.6243	20.1495	19.8245
1060	10.4	16.4666	20.5833	22.7494	16.5746	22.0994	19.8245	27.6243	20.4745	19.8245
1061	10.4	16.4666	20.7999	23.0744	16.5746	22.0994	19.8245	27.6243	20.4745	20.1495
1062	10.6166	16.4666	20.3666	22.7494	16.5746	21.7745	19.8245	27.6243	20.4745	20.1495
1063	9.96663	16.4666	21.0166	22.7494	16.5746	22.0994	20.1495	28.2743	21.4495	19.8245
1064	10.8333	16.4666	20.7999	23.0744	16.5746	22.0994	19.8245	27.9493	20.7995	20.1495
1065	10.4	16.6833	21.0166	23.0744	16.5746	22.0994	19.4995	27.9493	20.4745	19.8245
1066	10.8333	17.1166	21.0166	23.0744	16.2496	22.0994	19.4995	28.2743	20.7995	19.8245
1067	10.8333	16.2499	20.7999	23.0744	16.2496	22.4244	19.8245	27.6243	20.7995	19.8245
1068	10.6166	16.6833	20.5833	23.0744	16.2496	22.0994	20.4745	27.6243	20.4745	19.8245
1069	10.8333	16.6833	20.3666	23.0744	16.5746	21.7745	19.8245	27.2993	20.4745	19.8245
1070	10.6166	16.4666	20.7999	22.7494	16.2496	22.4244	19.8245	26.9743	20.7995	19.8245
1071	11.05	16.4666	20.5833	23.0744	16.2496	21.7745	19.4995	27.9493	20.4745	19.8245
1072	10.6166	16.6833	20.7999	22.7494	16.5746	22.4244	19.8245	27.2993	20.4745	19.8245
1073	10.6166	17.1166	20.7999	22.7494	16.2496	22.0994	19.4995	27.9493	20.7995	19.8245
1074	10.6166	16.4666	20.5833	22.7494	16.5746	21.7745	20.4745	27.9493	21.4495	19.8245
1075	10.6166	16.4666	20.5833	22.7494	16.5746	22.0994	19.8245	27.2993	20.1495	19.8245
1076	10.1833	16.8999	20.7999	22.7494	16.2496	21.7745	20.1495	27.2993	20.7995	19.8245
1077	10.6166	16.8999	20.5833	22.7494	16.2496	22.0994	19.4995	27.2993	20.1495	19.8245
1078	10.6166	17.1166	21.0166	22.7494	16.5746	21.7745	19.8245	27.6243	20.7995	19.4995
1079	10.6166	16.6833	20.7999	22.7494	16.5746	22.4244	20.1495	28.2743	20.7995	20.1495
1080	10.8333	16.6833	20.5833	23.0744	16.5746	21.7745	20.4745	27.6243	20.1495	19.8245
1081	10.1833	16.6833	20.7999	22.7494	16.5746	21.7745	20.1495	27.6243	20.7995	19.8245
1082	10.4	16.6833	21.0166	23.0744	16.8996	21.4495	20.1495	27.6243	20.7995	20.1495
1083	10.1833	16.6833	20.7999	22.7494	16.2496	21.7745	19.8245	27.9493	20.7995	19.8245
1084	10.6166	16.6833	21.2333	23.0744	16.8996	22.0994	20.1495	28.2743	21.4495	20.1495
1085	10.4	16.6833	20.7999	23.0744	16.5746	22.0994	19.8245	27.9493	20.4745	19.8245
1086	10.4	16.2499	20.7999	22.7494	16.8996	21.4495	20.1495	27.9493	20.7995	19.8245
1087	10.6166	16.6833	20.5833	22.7494	16.5746	21.7745	20.4745	27.6243	20.7995	20.1495
1088	10.6166	16.6833	20.7999	23.0744	16.5746	21.7745	19.8245	27.9493	20.4745	19.8245
1089	10.6166	16.8999	21.0166	23.0744	15.9246	21.1245	20.1495	26.9743	20.7995	20.1495
1090	11.05	16.6833	21.0166	22.7494	15.5996	21.7745	20.1495	27.6243	20.1495	20.1495
1091	10.8333	16.4666	20.7999	23.0744	15.9246	21.7745	20.4745	28.2743	19.8245	20.4745
1092	10.8333	16.6833	20.7999	22.7494	15.9246	21.4495	20.1495	27.6243	21.1245	20.1495
1093	10.8333	16.6833	21.0166	23.0744	16.2496	22.0994	19.8245	27.9493	20.7995	19.8245
1094	10.8333	16.6833	21.0166	22.7494	16.5746	22.0994	20.1495	27.9493	20.4745	19.8245
1095	10.6166	16.6833	21.0166	22.7494	16.5746	22.0994	20.1495	27.9493	21.1245	19.8245
1096	10.4	16.6833	21.0166	23.0744	16.5746	21.7745	19.4995	27.9493	20.4745	20.1495
1097	10.6166	16.8999	21.0166	22.7494	15.9246	21.7745	20.1495	27.6243	20.7995	19.8245
1098	10.8333	16.6833	21.0166	22.7494	15.5996	21.4495	19.8245	27.9493	20.4745	19.8245
1099	10.6166	16.4666	21.0166	22.7494	16.5746	22.4244	19.8245	27.6243	20.4745	20.1495
1100	10.6166	16.2499	20.7999	22.7494	15.9246	22.0994	20.4745	27.9493	20.4745	20.1495
1101	10.6166	16.4666	20.7999	22.7494	15.9246	22.0994	19.8245	27.6243	20.7995	19.8245
1102	10.6166	16.6833	21.0166	22.7494	16.2496	22.0994	20.1495	27.6243	21.1245	20.1495
1103	10.8333	16.2499	20.7999	22.7494	15.9246	22.4244	19.8245	27.6243	20.1495	19.8245
1104	10.4	16.4666	20.7999	23.0744	15.9246	22.0994	20.1495	27.9493	20.4745	20.1495
1105	10.8333	16.8999	20.3666	22.7494	16.2496	22.0994	19.8245	27.6243	20.7995	20.1495
1106	11.05	16.6833	20.7999	23.0744	16.2496	22.0994	19.8245	27.9493	21.1245	20.1495
1107	10.8333	16.6833	20.7999	23.0744	16.5746	21.7745	20.1495	27.9493	21.1245	20.1495
1108	11.05	16.2499	20.5833	22.7494	16.2496	22.4244	20.1495	27.9493	20.1495	19.8245
1109	10.6166	16.4666	20.7999	22.7494	16.2496	22.4244	19.8245	28.2743	20.4745	20.1495
1110	10.8333	16.6833	21.0166	23.0744	16.5746	21.7745	19.8245	27.9493	21.1245	19.8245
1111	10.6166	16.4666	20.7999	23.0744	16.2496	22.0994	20.1495	27.6243	20.7995	20.1495
1112	10.6166	16.2499	20.7999	22.7494	16.2496	21.7745	20.1495	27.9493	20.7995	19.8245
1113	10.1833	16.6833	20.7999	22.7494	16.2496	21.7745	19.8245	28.2743	20.4745	19.8245
1114	10.8333	16.6833	21.0166	23.0744	16.5746	21.7745	20.1495	28.2743	20.4745	19.8245
1115	10.6166	16.6833	20.7999	22.7494	16.2496	22.4244	20.1495	28.2743	20.7995	20.1495
1116	10.6166	16.6833	21.0166	22.7494	15.9246	22.0994	20.4745	27.2993	20.4745	20.1495
1117	10.6166	16.0333	21.0166	23.0744	16.2496	22.0994	20.1495	28.2743	20.7995	20.4745
1118	10.8333	16.4666	21.0166	23.0744	15.9246	21.7745	20.1495	27.6243	20.7995	20.1495
1119	10.6166	16.4666	21.0166	22.7494	15.9246	22.0994	20.1495	28.2743	20.7995	20.1495
1120	10.6166	16.4666	20.7999	22.7494	15.9246	21.7745	20.1495	27.6243	20.1495	20.1495
1121	10.6166	16.6833	21.0166	23.0744	15.9246	21.7745	19.8245	28.2743	20.7995	20.1495
1122	10.8333	16.2499	20.7999	22.7494	15.5996	22.4244	20.1495	27.9493	20.7995	19.8245
1123	10.4	16.6833	20.7999	22.7494	16.2496	21.7745	19.8245	27.6243	21.4495	19.8245
1124	10.8333	16.8999	21.0166	23.0744	16.2496	22.0994	20.1495	28.2743	20.1495	19.8245
1125	10.6166	16.4666	21.0166	23.0744	16.2496	22.0994	19.8245	27.6243	20.7995	19.8245
1126	10.8333	16.4666	21.0166	23.0744	16.2496	22.0994	20.1495	27.6243	21.4495	19.8245
1127	10.8333	16.8999	21.0166	22.7494	16.2496	22.0994	20.1495	28.2743	20.7995	20.1495
1128	10.4	16.4666	21.2333	22.7494	16.5746	22.0994	20.1495	28.2743	21.1245	20.4745
1129	10.8333	16.6833	21.2333	22.7494	16.2496	22.4244	19.8245	27.9493	21.1245	19.8245
1130	11.05	16.4666	21.0166	22.7494	16.2496	21.7745	19.8245	28.2743	20.7995	19.8245
1131	10.6166	16.6833	21.0166	23.0744	16.2496	22.0994	20.1495	27.9493	20.7995	19.8245
1132	10.8333	16.2499	20.7999	22.7494	16.2496	21.7745	19.8245	28.2743	20.4745	19.8245
1133	10.8333	16.2499	21.0166	22.7494	16.5746	22.0994	19.8245	27.9493	20.7995	19.8245
1134	10.6166	16.4666	21.0166	23.0744	16.2496	21.7745	20.1495	28.5993	21.1245	19.8245
1135	10.6166	16.6833	21.0166	23.0744	16.2496	21.7745	20.1495	27.9493	20.7995	20.1495
1136	10.8333	16.2499	20.7999	22.7494	16.2496	22.0994	20.1495	28.2743	20.7995	19.8245
1137	10.6166	16.4666	21.0166	23.0744	16.2496	22.0994	20.1495	27.9493	20.4745	19.8245
1138	10.8333	16.2499	21.2333	23.0744	15.9246	21.7745	20.4745	27.9493	20.4745	19.8245
1139	11.05	16.0333	21.0166	22.7494	16.5746	22.4244	20.4745	27.9493	21.1245	19.4995
1140	10.8333	16.4666	21.2333	22.7494	16.2496	22.0994	20.4745	27.6243	20.4745	19.8245
1141	10.6166	16.4666	21.2333	22.7494	15.9246	22.0994	19.8245	27.2993	20.7995	20.1495
1142	10.8333	16.4666	20.7999	22.7494	16.5746	22.0994	20.4745	28.2743	20.1495	19.8245
1143	10.8333	16.4666	21.0166	22.7494	16.2496	22.4244	20.4745	27.9493	20.7995	19.8245
1144	10.8333	16.2499	20.5833	22.7494	15.9246	22.0994	20.4745	28.5993	20.7995	19.8245
1145	10.6166	16.4666	21.4499	22.7494	16.2496	21.4495	20.1495	27.2993	20.7995	20.1495
1146	10.4	16.4666	21.2333	22.7494	16.5746	22.0994	20.1495	27.2993	20.4745	20.1495
1147	10.6166	16.4666	21.2333	22.7494	16.5746	22.0994	20.1495	27.2993	20.4745	20.1495
1148	10.8333	16.4666	21.0166	22.7494	16.5746	21.7745	20.1495	27.9493	21.4495	20.1495
1149	10.4	16.6833	21.0166	23.0744	15.9246	22.0994	19.8245	27.2993	21.1245	19.8245
1150	10.4	16.6833	21.4499	22.7494	16.5746	22.7494	20.4745	27.9493	21.1245	19.8245
1151	10.4	16.2499	21.2333	23.0744	16.5746	22.0994	21.1245	27.2993	20.7995	19.8245
1152	10.6166	16.4666	21.2333	22.7494	15.9246	22.0994	20.4745	27.9493	21.7745	20.1495
1153	11.05	16.4666	21.2333	22.7494	15.9246	22.0994	20.4745	27.6243	20.7995	20.1495
1154	10.8333	16.8999	20.5833	22.7494	16.2496	22.0994	19.4995	27.9493	20.7995	20.1495
1155	10.6166	15.8166	21.0166	23.0744	16.5746	22.0994	20.4745	27.6243	20.7995	20.1495
1156	10.8333	16.2499	21.0166	23.0744	16.2496	22.0994	20.4745	27.2993	21.1245	19.8245
1157	11.05	16.6833	20.7999	22.7494	15.9246	22.0994	19.8245	27.6243	20.7995	19.8245
1158	11.05	16.2499	21.0166	23.0744	15.9246	21.7745	20.1495	28.2743	20.1495	20.1495
1159	10.6166	16.4666	20.3666	22.7494	16.2496	22.4244	19.8245	27.6243	20.7995	20.1495
1160	10.4	16.4666	21.0166	23.0744	15.9246	21.4495	19.8245	27.6243	20.4745	20.1495
1161	11.05	16.4666	21.2333	22.7494	16.5746	22.0994	20.1495	27.6243	20.7995	19.8245
1162	10.4	16.4666	21.0166	23.0744	16.5746	22.4244	19.8245	27.9493	20.4745	19.8245
1163	10.8333	16.4666	21.4499	22.4244	16.2496	22.4244	20.1495	27.2993	20.4745	19.8245
1164	10.8333	16.6833	20.7999	23.0744	16.2496	22.0994	20.1495	27.9493	20.4745	20.1495
1165	11.05	16.4666	20.7999	22.7494	16.2496	22.4244	20.1495	28.2743	21.1245	20.4745
1166	10.8333	16.4666	21.0166	22.7494	16.2496	21.7745	20.4745	27.9493	20.7995	19.8245
1167	11.05	16.2499	21.2333	22.7494	16.5746	22.0994	20.1495	27.6243	20.7995	20.1495
1168	10.8333	16.4666	20.7999	22.7494	16.5746	22.4244	20.4745	27.6243	21.4495	20.1495
1169	10.8333	16.2499	21.0166	23.0744	16.2496	22.0994	20.1495	27.9493	20.7995	20.1495
1170	10.8333	16.2499	21.0166	22.7494	16.5746	22.0994	20.1495	27.9493	20.7995	19.8245
1171	10.4	16.4666	21.0166	22.7494	16.5746	22.4244	20.1495	27.6243	21.1245	20.1495
1172	11.05	16.4666	21.4499	22.4244	16.5746	22.7494	20.1495	26.9743	20.7995	19.8245
1173	10.8333	16.6833	20.3666	22.7494	16.2496	22.4244	20.1495	27.6243	21.1245	20.1495
1174	10.8333	16.4666	21.2333	22.7494	16.5746	22.0994	20.1495	27.9493	20.4745	20.1495
1175	10.8333	16.4666	21.2333	23.0744	16.5746	22.7494	20.1495	27.6243	20.4745	20.1495
1176	11.05	16.2499	20.5833	22.7494	16.2496	22.4244	19.8245	27.9493	20.7995	20.1495
1177	11.05	16.4666	21.0166	22.7494	16.2496	22.0994	19.8245	27.6243	20.7995	20.1495
1178	10.8333	16.4666	21.0166	23.0744	16.2496	22.7494	20.7995	27.9493	20.7995	20.4745
1179	10.8333	16.6833	20.3666	22.7494	16.2496	22.7494	20.4745	27.9493	21.1245	20.1495
1180	10.8333	16.4666	21.0166	22.4244	16.2496	22.4244	19.8245	27.6243	21.1245	20.1495
1181	10.6166	16.2499	20.7999	22.7494	16.2496	22.0994	20.4745	27.9493	20.7995	19.8245
1182	10.4	16.4666	20.5833	22.7494	16.2496	22.4244	20.1495	27.6243	20.7995	19.8245
1183	10.8333	16.2499	20.7999	23.0744	16.2496	22.4244	20.1495	27.6243	20.7995	20.1495
1184	11.05	16.2499	21.0166	22.7494	15.9246	22.0994	20.1495	27.6243	20.7995	19.8245
1185	10.8333	16.4666	21.2333	23.0744	15.9246	22.7494	20.4745	27.9493	20.4745	19.8245
1186	11.05	16.4666	21.0166	22.4244	16.2496	22.4244	20.4745	27.9493	21.4495	20.1495
1187	11.05	16.6833	21.2333	22.7494	16.2496	22.7494	20.1495	27.9493	20.4745	20.1495
1188	11.05	16.2499	21.0166	22.7494	15.9246	22.4244	19.8245	28.2743	20.7995	20.1495
1189	10.8333	16.4666	21.0166	22.7494	15.9246	22.0994	20.4745	28.2743	20.7995	20.4745
1190	10.6166	16.4666	20.7999	22.7494	16.2496	22.4244	19.8245	27.9493	20.7995	20.1495
1191	10.6166	16.2499	21.0166	22.7494	16.2496	22.4244	20.4745	26.9743	21.1245	20.4745
1192	10.8333	16.2499	20.7999	22.7494	16.2496	22.7494	19.8245	27.9493	20.4745	19.8245
1193	10.6166	16.0333	21.0166	22.7494	15.9246	22.4244	20.1495	27.9493	20.7995	20.1495
1194	10.8333	16.2499	21.2333	22.7494	16.2496	22.4244	20.1495	27.2993	20.7995	19.8245
1195	11.05	16.4666	21.0166	23.0744	16.2496	21.7745	20.1495	27.6243	21.1245	19.8245
1196	10.8333	16.0333	21.2333	22.7494	15.9246	22.4244	20.4745	27.6243	20.1495	19.8245
1197	10.1833	16.2499	21.0166	22.4244	16.2496	22.4244	20.1495	27.2993	20.4745	20.4745
1198	10.8333	16.4666	21.0166	22.7494	15.9246	22.0994	19.8245	27.6243	20.7995	20.4745
1199	10.4	16.2499	21.0166	22.7494	15.9246	22.0994	19.8245	27.6243	21.1245	20.1495
1200	10.8333	16.6833	21.2333	22.7494	16.2496	22.4244	20.4745	27.2993	20.7995	19.8245
1201	11.05	16.2499	21.0166	22.4244	16.2496	22.4244	20.4745	27.9493	21.1245	20.1495
1202	10.8333	16.4666	21.0166	23.0744	16.2496	22.4244	19.8245	27.6243	21.1245	19.8245
1203	11.05	16.4666	21.2333	22.4244	16.2496	22.4244	20.1495	27.2993	20.7995	20.1495
1204	11.05	16.2499	21.4499	22.7494	16.2496	22.4244	20.1495	27.6243	20.7995	20.1495
1205	10.8333	16.4666	21.2333	23.0744	16.5746	22.0994	20.1495	27.6243	21.1245	20.4745
1206	10.6166	16.4666	21.2333	23.0744	16.5746	22.0994	20.4745	27.2993	21.1245	19.8245
1207	11.05	16.2499	21.2333	22.7494	15.9246	22.4244	20.4745	27.6243	20.7995	20.1495
1208	11.05	16.2499	21.0166	22.7494	16.5746	22.4244	20.1495	27.6243	21.7745	20.1495
1209	11.05	16.4666	21.0166	23.0744	16.2496	22.7494	20.7995	27.6243	20.7995	19.8245
1210	11.05	16.2499	21.0166	22.7494	16.2496	22.4244	19.8245	27.9493	20.7995	19.8245
1211	11.05	16.2499	21.2333	23.0744	16.5746	21.7745	20.4745	27.6243	20.4745	20.4745
1212	10.8333	16.4666	21.2333	23.0744	16.5746	22.7494	20.4745	28.2743	20.4745	20.1495
1213	11.05	16.2499	21.0166	23.0744	16.5746	22.4244	20.4745	27.2993	21.1245	19.8245
1214	10.8333	16.2499	21.0166	22.7494	16.5746	22.0994	20.1495	27.9493	20.4745	20.4745
1215	11.2666	16.2499	20.7999	22.7494	16.2496	22.0994	19.8245	27.6243	20.4745	19.8245
1216	10.8333	16.4666	21.2333	22.4244	16.5746	22.4244	20.1495	27.9493	20.4745	20.1495
1217	11.2666	16.2499	21.2333	22.7494	15.9246	22.0994	20.7995	27.6243	20.7995	19.8245
1218	10.8333	16.2499	21.0166	22.7494	15.9246	22.4244	20.4745	27.6243	20.7995	19.8245
1219	10.8333	16.0333	21.0166	22.7494	16.2496	22.4244	20.4745	27.6243	21.4495	20.7995
1220	10.8333	16.2499	20.7999	22.7494	15.9246	22.4244	20.1495	27.2993	20.7995	20.4745
1221	11.05	16.4666	20.7999	22.7494	15.9246	22.4244	20.1495	27.6243	21.7745	19.8245
1222	10.8333	16.2499	21.0166	23.0744	16.2496	22.4244	19.4995	27.6243	20.7995	20.1495
1223	11.2666	16.2499	21.0166	23.0744	15.9246	23.0744	20.4745	27.2993	21.1245	20.1495
1224	11.05	16.2499	20.7999	22.7494	16.5746	23.0744	20.4745	27.9493	20.4745	19.8245
1225	10.8333	16.4666	21.0166	22.7494	16.5746	22.7494	20.4745	26.9743	21.1245	19.8245
1226	11.05	16.4666	21.0166	22.7494	16.5746	22.7494	19.8245	27.6243	21.4495	20.1495
1227	10.8333	16.0333	21.0166	22.7494	16.2496	22.7494	20.7995	27.6243	20.4745	20.1495
1228	11.05	16.4666	20.5833	22.7494	16.5746	22.7494	20.1495	28.2743	21.1245	20.1495
1229	10.8333	16.4666	21.0166	23.0744	16.2496	23.0744	20.7995	27.6243	20.7995	20.1495
1230	10.8333	16.2499	21.0166	22.7494	16.5746	22.7494	20.1495	27.6243	20.1495	19.8245
1231	10.8333	16.6833	21.0166	23.0744	16.5746	22.7494	19.8245	27.9493	20.7995	20.4745
1232	11.2666	16.4666	21.0166	22.4244	16.5746	22.7494	20.1495	27.2993	21.1245	20.1495
1233	11.05	16.0333	21.0166	22.7494	15.9246	22.7494	20.1495	27.9493	20.4745	19.8245
1234	10.8333	16.2499	20.7999	22.7494	16.2496	22.4244	20.4745	27.9493	20.7995	20.1495
1235	11.05	16.2499	21.0166	23.0744	16.5746	22.4244	20.1495	27.2993	20.7995	20.1495
1236	11.05	16.4666	21.2333	22.7494	16.5746	22.7494	20.7995	27.9493	20.7995	19.8245
1237	11.05	16.2499	21.0166	22.7494	16.5746	22.7494	19.8245	27.6243	20.4745	20.1495
1238	10.4	16.4666	21.2333	22.7494	16.2496	23.0744	20.1495	28.2743	20.1495	19.8245
1239	10.8333	16.4666	21.2333	22.4244	16.2496	23.0744	20.7995	27.2993	20.4745	20.1495
1240	10.8333	16.4666	21.2333	22.4244	16.5746	22.7494	20.1495	27.6243	20.4745	20.1495
1241	10.6166	16.2499	20.7999	22.4244	16.2496	22.4244	20.1495	27.6243	20.7995	20.1495
1242	10.6166	16.0333	21.2333	22.7494	15.9246	22.7494	20.7995	27.6243	20.7995	20.1495
1243	11.05	16.2499	20.7999	22.7494	15.9246	22.4244	19.8245	27.9493	20.7995	20.4745
1244	10.8333	16.2499	20.7999	22.7494	16.5746	22.7494	20.4745	27.9493	20.1495	20.4745
1245	10.6166	16.2499	21.0166	22.7494	16.5746	22.7494	20.1495	27.6243	20.7995	20.1495
1246	11.2666	16.2499	21.0166	22.7494	16.5746	22.7494	19.8245	27.6243	20.4745	20.1495
1247	11.2666	16.4666	20.7999	22.7494	16.5746	22.4244	19.8245	27.2993	20.7995	20.1495
1248	10.6166	16.4666	21.0166	22.7494	16.5746	22.4244	19.8245	27.2993	21.1245	20.1495
1249	10.4	16.6833	20.7999	22.7494	16.2496	22.4244	19.4995	27.6243	20.7995	20.1495
1250	11.05	16.4666	21.2333	22.7494	16.5746	22.7494	19.8245	27.9493	20.4745	19.8245
1251	11.05	16.2499	21.0166	22.7494	16.2496	22.7494	20.4745	27.6243	21.1245	20.4745
1252	10.8333	16.2499	21.0166	22.7494	16.5746	22.0994	20.1495	27.9493	20.4745	20.4745
1253	10.8333	16.0333	20.7999	22.7494	16.2496	22.4244	20.1495	27.6243	21.1245	20.4745
1254	11.05	16.0333	21.0166	22.4244	16.2496	22.4244	20.1495	27.2993	20.7995	20.1495
1255	10.8333	16.4666	21.0166	22.4244	15.9246	22.7494	20.1495	27.6243	21.1245	20.1495
1256	11.05	16.4666	21.2333	22.7494	15.5996	22.7494	20.4745	27.6243	20.7995	20.4745
1257	10.8333	16.4666	21.0166	22.4244	15.9246	22.4244	20.1495	27.2993	21.1245	19.8245
1258	10.6166	16.4666	21.0166	22.4244	16.2496	22.0994	20.1495	27.6243	20.7995	20.4745
1259	11.2666	16.2499	21.2333	22.7494	16.2496	22.0994	20.1495	27.2993	21.4495	20.1495
1260	11.4833	16.4666	20.7999	22.7494	16.2496	22.4244	20.1495	27.9493	20.7995	20.1495
1261	11.05	16.6833	21.2333	22.4244	16.2496	22.0994	20.4745	27.9493	21.4495	20.1495
1262	11.4833	16.4666	21.0166	22.7494	16.5746	22.4244	19.8245	27.6243	21.1245	20.7995
1263	11.05	16.4666	21.0166	22.7494	16.2496	21.7745	20.7995	27.9493	21.1245	19.8245
1264	11.05	16.4666	21.0166	22.4244	16.2496	22.0994	19.8245	27.2993	21.1245	20.4745
1265	11.05	16.2499	21.0166	22.7494	16.5746	22.4244	20.1495	27.6243	21.4495	20.4745
1266	11.4833	16.2499	20.7999	22.7494	16.5746	22.4244	20.1495	27.6243	20.7995	20.1495
1267	11.05	16.4666	21.0166	22.7494	16.5746	22.0994	20.1495	27.2993	21.1245	20.4745
1268	11.05	16.4666	21.0166	22.7494	16.5746	22.0994	20.1495	27.2993	20.7995	20.7995
1269	11.05	16.2499	21.0166	22.4244	16.2496	21.7745	19.8245	27.2993	20.7995	20.7995
1270	11.05	16.4666	21.0166	22.4244	16.2496	22.0994	19.8245	27.6243	21.1245	20.1495
1271	11.05	16.4666	21.0166	22.4244	16.5746	22.4244	20.4745	27.6243	21.1245	20.4745
1272	11.2666	16.2499	21.0166	22.7494	16.5746	22.0994	20.1495	27.9493	21.7745	19.8245
1273	10.8333	16.4666	21.0166	22.7494	16.2496	22.0994	20.1495	27.2993	20.7995	20.1495
1274	11.05	16.4666	21.0166	22.7494	16.2496	22.4244	20.4745	27.2993	21.1245	20.4745
1275	11.2666	16.2499	21.0166	22.7494	16.5746	21.7745	20.1495	27.6243	20.7995	20.4745
1276	11.05	16.2499	21.0166	22.7494	16.2496	22.0994	20.4745	27.2993	21.4495	20.1495
1277	10.8333	16.2499	21.0166	22.7494	16.2496	21.7745	20.1495	27.9493	21.1245	20.1495
1278	10.6166	16.2499	20.7999	22.7494	16.2496	22.0994	20.1495	27.9493	20.7995	20.1495
1279	10.8333	16.2499	20.7999	22.4244	15.9246	22.0994	20.1495	27.9493	21.1245	20.1495
1280	10.8333	16.2499	21.0166	22.7494	16.5746	22.0994	20.1495	27.6243	20.7995	20.4745
1281	11.05	16.2499	21.0166	22.7494	16.2496	22.0994	20.1495	27.2993	20.7995	20.4745
1282	10.4	16.2499	21.0166	22.7494	16.5746	22.4244	20.1495	27.6243	21.1245	20.1495
1283	10.8333	16.4666	21.2333	22.7494	16.2496	22.4244	20.1495	27.6243	21.1245	20.4745
1284	11.05	16.0333	21.2333	22.7494	16.2496	21.7745	20.1495	27.6243	20.7995	20.4745
1285	11.05	16.2499	20.7999	22.7494	16.2496	22.0994	20.1495	26.9743	21.1245	20.4745
1286	11.05	16.0333	20.7999	22.7494	16.2496	22.0994	20.1495	27.6243	20.1495	20.4745
1287	11.2666	16.2499	20.7999	22.7494	16.2496	21.7745	20.1495	27.2993	21.4495	20.4745
1288	11.2666	16.4666	21.0166	22.4244	16.2496	22.4244	20.1495	27.9493	21.4495	20.1495
1289	11.2666	16.2499	21.0166	22.7494	16.5746	22.0994	20.4745	27.2993	21.1245	20.1495
1290	11.2666	16.2499	20.7999	22.7494	16.2496	22.4244	20.4745	27.6243	20.1495	20.4745
1291	11.2666	16.2499	21.0166	22.4244	16.2496	22.0994	20.4745	27.6243	21.4495	20.4745
1292	10.6166	16.2499	21.2333	22.4244	16.2496	22.0994	20.1495	27.6243	20.7995	20.4745
1293	11.2666	16.2499	21.0166	22.7494	16.2496	22.4244	20.4745	27.6243	21.1245	20.1495
1294	11.05	16.4666	21.0166	22.4244	16.2496	22.0994	19.8245	27.9493	21.7745	20.1495
1295	11.2666	16.2499	21.0166	22.7494	16.2496	22.0994	20.7995	27.9493	20.7995	20.4745
1296	11.05	16.2499	21.0166	22.7494	16.2496	22.4244	20.4745	27.6243	21.1245	20.4745
1297	10.6166	16.4666	21.0166	22.7494	16.2496	22.4244	20.1495	27.6243	21.1245	20.4745
1298	11.2666	16.2499	21.0166	22.4244	16.2496	21.7745	20.1495	27.6243	21.1245	20.1495
1299	11.2666	16.2499	21.2333	22.4244	16.2496	21.7745	20.1495	27.2993	21.4495	20.1495
1300	11.2666	16.4666	21.0166	22.7494	15.9246	21.7745	20.1495	27.9493	21.1245	20.4745
1301	10.6166	16.2499	21.0166	22.7494	16.2496	22.4244	20.4745	27.9493	21.1245	20.1495
1302	11.2666	16.0333	21.2333	22.7494	16.2496	22.0994	19.8245	27.2993	21.1245	20.1495
1303	11.05	16.4666	21.0166	22.7494	16.2496	21.7745	20.1495	27.2993	20.4745	20.1495
1304	10.8333	16.4666	21.0166	22.4244	16.2496	22.0994	20.7995	27.6243	20.7995	20.7995
1305	11.2666	16.4666	21.0166	22.7494	16.2496	22.0994	20.1495	27.6243	20.4745	20.1495
1306	11.05	16.2499	20.7999	22.4244	16.2496	21.7745	19.4995	27.9493	20.4745	20.1495
1307	11.2666	16.4666	21.0166	22.4244	15.9246	22.4244	20.1495	27.6243	20.7995	20.1495
1308	10.8333	16.4666	21.0166	22.7494	16.2496	22.4244	20.1495	27.9493	21.1245	20.4745
1309	10.8333	16.4666	21.0166	22.4244	16.2496	21.7745	20.1495	27.9493	21.1245	20.1495
1310	11.2666	16.4666	21.0166	22.4244	15.9246	21.7745	20.7995	27.6243	20.7995	20.1495
1311	10.8333	16.0333	21.0166	22.7494	15.9246	21.7745	19.8245	27.9493	20.4745	20.1495
1312	10.8333	16.2499	21.0166	22.7494	16.2496	22.0994	20.1495	27.6243	21.1245	20.1495
1313	11.05	16.2499	21.2333	22.4244	15.9246	21.7745	20.4745	27.6243	21.1245	20.1495
1314	11.2666	16.0333	21.0166	22.4244	16.2496	21.4495	20.1495	28.2743	20.1495	20.1495
1315	10.6166	16.4666	21.0166	22.4244	16.2496	21.4495	20.1495	27.2993	20.7995	20.4745
1316	11.05	16.2499	20.7999	22.7494	15.9246	21.1245	20.1495	27.6243	21.1245	20.1495
1317	11.05	16.2499	21.2333	22.0994	16.2496	21.7745	20.1495	27.6243	21.1245	20.1495
1318	11.2666	16.2499	21.0166	22.7494	15.9246	21.7745	20.1495	28.2743	20.1495	20.1495
1319	10.8333	16.2499	21.0166	22.7494	16.2496	22.0994	20.1495	27.9493	20.7995	20.7995
1320	10.8333	16.2499	21.0166	22.4244	16.2496	21.7745	19.4995	27.2993	20.7995	20.4745
1321	11.05	16.2499	21.0166	22.7494	15.5996	21.7745	20.1495	27.9493	21.1245	20.4745
1322	10.4	16.2499	21.0166	22.4244	15.9246	21.7745	20.1495	27.9493	21.4495	20.1495
1323	11.05	16.0333	21.2333	22.7494	16.2496	22.4244	19.8245	27.6243	21.1245	20.4745
1324	10.8333	16.4666	21.0166	22.7494	16.2496	22.0994	20.4745	27.9493	21.1245	20.4745
1325	10.4	16.2499	21.0166	23.0744	16.2496	21.7745	20.4745	27.9493	21.4495	20.1495
1326	11.05	16.2499	21.2333	22.4244	15.9246	21.7745	20.1495	27.2993	20.4745	20.4745
1327	11.2666	16.0333	21.0166	22.4244	15.9246	21.7745	20.1495	27.2993	20.7995	20.1495
1328	10.8333	16.2499	21.2333	22.4244	16.2496	21.7745	20.4745	27.9493	20.7995	20.1495
1329	11.05	16.0333	21.2333	22.7494	15.9246	22.0994	20.4745	27.9493	21.4495	20.4745
1330	11.05	16.2499	21.2333	22.7494	16.2496	21.7745	20.1495	27.2993	20.4745	20.4745
1331	11.05	16.2499	21.2333	22.7494	16.2496	21.7745	20.1495	27.2993	21.1245	20.4745
1332	10.6166	15.8166	21.0166	22.7494	15.9246	21.4495	20.4745	27.6243	21.1245	20.4745
1333	11.05	16.2499	21.0166	22.7494	16.2496	22.0994	20.4745	28.2743	20.7995	20.1495
1334	11.05	16.4666	21.0166	22.4244	16.2496	21.7745	20.1495	27.6243	21.4495	20.4745
1335	11.05	16.2499	21.4499	22.7494	15.9246	21.7745	20.1495	27.6243	21.1245	20.4745
1336	10.8333	16.0333	21.0166	22.7494	16.2496	21.7745	20.4745	27.6243	21.1245	20.1495
1337	11.05	16.2499	21.0166	22.7494	16.5746	21.7745	20.1495	27.6243	21.7745	20.1495
1338	11.05	16.4666	21.2333	22.7494	15.9246	21.4495	20.4745	27.9493	21.1245	20.4745
1339	10.4	16.0333	21.4499	22.4244	15.9246	21.7745	20.4745	27.6243	20.7995	20.4745
1340	11.4833	16.0333	21.0166	22.7494	16.2496	21.7745	20.1495	27.6243	20.7995	20.4745
1341	11.2666	16.2499	21.0166	22.4244	16.2496	22.0994	20.1495	27.6243	20.7995	20.1495
1342	11.05	16.2499	21.2333	22.7494	16.2496	21.7745	20.4745	27.9493	20.7995	19.8245
1343	11.4833	16.4666	21.2333	22.7494	16.2496	22.0994	20.4745	27.6243	21.4495	20.1495
1344	11.2666	16.2499	21.0166	22.7494	15.9246	21.7745	20.7995	27.6243	20.7995	20.1495
1345	10.8333	16.4666	21.0166	22.7494	15.5996	22.0994	20.7995	28.2743	20.7995	20.1495
1346	10.6166	16.0333	21.0166	22.7494	16.2496	22.0994	20.1495	27.9493	20.4745	20.1495
1347	11.05	16.4666	21.2333	22.7494	15.9246	22.0994	19.4995	27.6243	20.7995	20.1495
1348	11.05	16.4666	21.2333	22.7494	16.2496	22.4244	20.4745	27.9493	21.1245	20.1495
1349	10.8333	16.4666	21.0166	23.0744	16.2496	22.0994	20.1495	27.6243	20.4745	20.1495
1350	11.05	16.2499	21.4499	23.0744	16.5746	22.0994	20.1495	27.2993	20.1495	20.1495
1351	11.05	16.4666	21.0166	23.0744	16.5746	22.4244	20.4745	27.6243	21.1245	20.7995
1352	11.05	16.4666	21.4499	23.0744	16.2496	22.0994	20.4745	27.6243	20.1495	20.1495
1353	10.8333	16.2499	21.0166	23.0744	16.2496	22.0994	20.1495	27.6243	21.1245	20.1495
1354	11.05	16.2499	21.2333	23.0744	16.5746	22.0994	20.1495	27.6243	20.7995	20.1495
1355	10.8333	16.0333	21.2333	23.0744	16.2496	22.4244	20.4745	27.9493	20.4745	19.8245
1356	11.2666	16.2499	21.2333	23.0744	16.5746	22.4244	20.4745	27.6243	20.4745	20.1495
1357	11.05	16.2499	21.2333	23.0744	16.2496	22.0994	20.4745	27.9493	20.4745	20.4745
1358	11.2666	16.2499	21.4499	22.7494	16.2496	22.4244	19.8245	27.6243	20.7995	19.8245
1359	11.2666	16.2499	21.4499	23.0744	16.2496	22.0994	19.8245	27.9493	21.4495	20.1495
1360	10.6166	16.0333	21.2333	23.0744	15.9246	22.4244	20.1495	27.6243	21.1245	20.1495
1361	11.05	16.2499	21.4499	23.0744	15.9246	22.4244	20.4745	27.2993	19.8245	20.1495
1362	11.05	16.2499	21.2333	23.0744	16.2496	22.7494	20.1495	27.6243	20.7995	20.1495
1363	11.05	16.4666	21.2333	23.0744	16.2496	22.7494	20.1495	27.9493	20.1495	19.8245
1364	11.05	16.2499	21.2333	23.0744	16.2496	22.7494	20.4745	27.6243	20.4745	20.1495
1365	11.2666	16.4666	21.4499	23.0744	16.2496	22.0994	20.1495	27.6243	20.4745	19.8245
1366	11.2666	16.2499	21.2333	23.0744	15.9246	22.4244	19.8245	27.6243	20.4745	20.1495
1367	11.2666	16.2499	21.2333	23.0744	16.2496	22.7494	20.1495	27.9493	20.4745	20.1495
1368	10.8333	16.6833	21.2333	23.0744	16.2496	22.7494	20.1495	27.9493	20.4745	20.1495
1369	11.2666	16.2499	21.4499	23.0744	15.9246	22.4244	19.8245	27.6243	21.1245	20.1495
1370	10.4	16.2499	21.2333	23.0744	16.5746	23.0744	20.1495	27.9493	20.7995	20.1495
1371	11.05	16.2499	21.4499	22.7494	16.5746	22.7494	20.1495	27.6243	20.4745	20.1495
1372	11.2666	16.2499	21.2333	23.0744	16.2496	22.7494	20.4745	27.9493	21.1245	20.1495
1373	10.8333	16.2499	21.2333	23.0744	16.5746	22.7494	20.1495	27.9493	20.7995	20.4745
1374	11.05	16.2499	21.2333	23.0744	16.2496	22.7494	20.1495	27.6243	20.4745	19.8245
1375	11.05	16.2499	21.0166	23.0744	15.9246	22.7494	20.1495	27.2993	20.7995	20.1495
1376	11.05	16.2499	21.2333	23.0744	16.2496	22.7494	20.1495	27.9493	20.7995	20.1495
1377	10.8333	16.0333	21.2333	23.0744	15.9246	22.4244	20.4745	27.6243	21.4495	19.8245
1378	10.8333	16.2499	21.4499	23.0744	16.2496	22.7494	20.4745	28.2743	20.1495	20.1495
1379	11.2666	16.2499	21.2333	23.0744	16.2496	22.7494	20.4745	27.6243	21.4495	20.1495
1380	10.8333	16.2499	21.4499	23.0744	16.2496	22.4244	20.1495	27.9493	20.4745	20.1495
1381	11.05	16.2499	21.2333	23.0744	16.2496	22.7494	20.1495	28.2743	21.4495	20.1495
1382	10.8333	16.2499	21.4499	23.0744	15.9246	22.7494	20.4745	27.6243	20.7995	20.1495
1383	11.4833	16.2499	21.2333	23.0744	16.2496	22.7494	20.1495	27.9493	20.7995	20.1495
1384	10.4	16.2499	21.0166	23.0744	16.2496	22.4244	19.8245	27.6243	20.1495	20.1495
1385	10.6166	16.4666	21.0166	23.0744	16.2496	22.4244	19.8245	26.9743	20.4745	20.1495
1386	10.8333	16.2499	21.2333	23.0744	16.2496	22.7494	20.1495	27.6243	20.1495	20.1495
1387	10.8333	16.2499	21.0166	23.0744	16.2496	22.7494	19.8245	27.6243	20.4745	20.1495
1388	10.1833	16.0333	21.4499	23.0744	16.8996	22.7494	20.1495	27.6243	21.1245	20.4745
1389	10.6166	16.2499	21.2333	23.0744	16.8996	22.4244	19.8245	27.9493	21.1245	20.1495
1390	11.05	16.2499	21.0166	23.0744	16.5746	22.7494	20.1495	27.6243	21.7745	20.4745
1391	10.6166	16.2499	20.7999	23.0744	16.5746	22.4244	19.8245	28.2743	20.4745	20.1495
1392	11.05	16.2499	21.2333	23.0744	16.5746	22.7494	20.1495	27.6243	21.7745	20.1495
1393	11.05	16.2499	21.2333	23.0744	16.2496	22.7494	20.1495	27.9493	21.1245	20.4745
1394	11.2666	16.2499	21.0166	23.0744	16.5746	22.7494	20.4745	27.2993	21.7745	20.1495
1395	11.4833	16.4666	21.0166	23.0744	16.2496	22.7494	20.1495	27.6243	20.1495	20.1495
1396	10.8333	16.4666	21.2333	23.0744	15.9246	22.4244	20.4745	27.9493	21.4495	20.1495
1397	11.05	16.0333	21.0166	23.0744	16.5746	22.4244	19.8245	27.9493	22.0994	20.7995
1398	11.05	16.0333	20.7999	23.0744	16.8996	22.7494	20.7995	27.9493	21.7745	20.1495
1399	10.8333	16.4666	20.7999	23.0744	16.2496	22.4244	20.4745	27.2993	20.7995	20.1495
1400	11.05	16.2499	20.7999	23.0744	16.5746	22.7494	20.4745	28.2743	21.1245	20.4745
1401	11.2666	16.2499	21.0166	22.7494	16.5746	22.0994	19.8245	27.6243	21.1245	19.8245
1402	11.2666	16.2499	21.0166	22.7494	16.8996	22.4244	19.8245	27.6243	21.1245	20.1495
1403	11.05	15.8166	20.7999	23.0744	16.8996	22.7494	20.4745	27.6243	21.7745	20.4745
1404	10.8333	16.0333	20.7999	22.7494	16.5746	22.4244	19.8245	27.6243	21.4495	20.1495
1405	10.8333	16.0333	21.0166	22.7494	16.8996	22.7494	20.1495	28.5993	21.7745	20.1495
1406	11.4833	16.2499	20.7999	23.0744	16.5746	22.4244	19.8245	27.6243	22.0994	19.8245
1407	11.05	16.2499	21.0166	23.0744	16.5746	22.4244	20.1495	27.2993	21.1245	20.4745
1408	11.2666	16.2499	20.7999	23.0744	16.8996	22.4244	20.1495	28.2743	21.4495	20.4745
1409	11.4833	16.4666	21.0166	22.7494	16.8996	22.4244	20.1495	27.9493	21.1245	19.8245
1410	10.8333	16.2499	20.7999	23.0744	16.5746	22.4244	20.4745	27.6243	21.4495	20.1495
1411	11.4833	16.4666	21.0166	23.0744	16.2496	22.4244	20.4745	27.9493	21.1245	19.8245
1412	11.05	16.4666	20.7999	23.0744	16.5746	21.7745	19.8245	28.2743	20.7995	20.1495
1413	10.8333	16.4666	21.0166	23.0744	16.5746	22.0994	19.8245	27.9493	21.7745	20.1495
1414	10.6166	16.2499	21.2333	23.0744	16.5746	22.4244	20.1495	27.9493	22.4244	19.8245
1415	11.2666	16.4666	21.0166	22.7494	16.5746	22.7494	20.7995	28.2743	21.4495	19.8245
1416	11.05	16.4666	21.2333	23.0744	16.8996	22.4244	20.1495	27.9493	21.7745	20.1495
1417	10.8333	16.0333	20.7999	23.0744	16.5746	22.4244	19.8245	28.2743	21.7745	20.1495
1418	10.4	16.4666	21.0166	23.0744	16.5746	22.4244	19.8245	27.9493	21.4495	20.4745
1419	10.8333	16.4666	20.7999	23.0744	16.2496	22.4244	19.8245	27.9493	21.7745	20.4745
1420	10.6166	16.4666	21.0166	23.0744	16.2496	22.4244	19.4995	28.2743	21.4495	20.1495
1421	11.05	16.0333	21.2333	23.0744	16.2496	22.4244	20.4745	27.9493	22.0994	20.1495
1422	10.8333	16.0333	21.2333	23.0744	16.5746	21.7745	19.1745	27.6243	21.7745	19.8245
1423	11.05	16.4666	21.0166	23.0744	17.2246	22.4244	19.8245	27.9493	21.7745	20.1495
1424	10.8333	16.4666	21.0166	23.0744	16.5746	22.4244	20.1495	28.2743	21.7745	20.1495
1425	10.6166	16.2499	21.2333	23.0744	16.5746	21.7745	20.4745	27.6243	21.4495	19.8245
1426	11.2666	16.4666	21.2333	22.7494	16.5746	22.4244	19.8245	28.2743	19.8245	20.1495
1427	10.8333	16.2499	21.2333	23.0744	17.2246	22.4244	20.4745	27.2993	20.7995	19.8245
1428	10.8333	16.4666	21.0166	23.0744	17.2246	22.4244	19.8245	27.6243	20.1495	20.1495
1429	10.8333	16.4666	21.2333	22.7494	16.5746	22.0994	20.1495	28.5993	21.7745	20.1495
1430	11.05	16.2499	20.7999	23.0744	16.5746	22.0994	20.1495	28.5993	20.1495	20.4745
1431	10.4	16.2499	21.0166	23.0744	16.5746	22.7494	20.1495	27.9493	20.7995	20.1495
1432	11.05	16.6833	21.0166	23.0744	16.5746	22.0994	20.4745	27.6243	20.4745	20.1495
1433	11.2666	16.2499	21.2333	23.0744	16.2496	22.4244	20.4745	28.2743	21.1245	20.1495
1434	10.8333	16.2499	20.7999	23.0744	16.5746	22.4244	20.1495	27.6243	21.1245	19.8245
1435	10.8333	16.4666	21.0166	23.0744	16.5746	22.4244	20.1495	27.9493	20.7995	20.4745
1436	10.1833	16.4666	21.0166	23.0744	16.5746	22.4244	20.4745	28.2743	20.7995	20.4745
1437	10.6166	16.2499	21.0166	22.7494	16.2496	22.0994	20.1495	28.5993	21.1245	19.8245
1438	10.6166	16.0333	21.0166	23.0744	16.5746	22.4244	20.1495	28.5993	21.4495	20.1495
1439	10.6166	16.2499	21.0166	23.0744	16.2496	22.4244	20.1495	27.2993	20.7995	19.8245
1440	10.8333	16.4666	21.0166	23.0744	16.5746	22.0994	19.8245	27.9493	21.7745	19.8245
1441	10.8333	16.2499	21.2333	23.0744	16.5746	22.7494	20.1495	28.2743	21.4495	19.8245
1442	11.05	16.2499	21.0166	23.0744	16.2496	22.4244	20.1495	27.9493	21.7745	19.8245
1443	10.8333	16.0333	21.0166	23.0744	16.2496	22.4244	20.1495	27.9493	21.1245	20.1495
1444	10.6166	16.2499	21.0166	22.7494	16.8996	22.4244	20.1495	26.9743	21.7745	19.8245
1445	10.4	16.2499	21.2333	23.0744	16.2496	22.7494	20.4745	28.2743	21.1245	19.8245
1446	11.2666	16.2499	21.0166	23.0744	16.5746	22.7494	19.8245	27.9493	20.7995	20.1495
1447	11.2666	16.4666	21.2333	23.0744	16.5746	22.7494	19.8245	28.2743	21.7745	20.1495
1448	10.8333	16.2499	21.0166	23.0744	16.8996	22.7494	19.8245	27.6243	22.0994	19.4995
1449	11.05	16.4666	21.2333	23.0744	16.8996	22.4244	20.1495	27.2993	21.4495	19.8245
1450	11.05	16.4666	21.0166	23.0744	16.5746	22.7494	20.4745	28.2743	21.1245	19.8245
1451	11.05	16.4666	21.2333	23.0744	17.2246	22.7494	20.4745	27.9493	21.7745	20.1495
1452	10.4	16.2499	21.0166	23.0744	16.5746	22.4244	20.4745	28.2743	21.7745	20.1495
1453	10.8333	16.4666	21.0166	23.0744	16.5746	22.7494	20.1495	27.9493	21.1245	20.1495
1454	11.4833	16.0333	21.0166	23.0744	16.5746	22.7494	19.8245	28.5993	21.4495	20.1495
1455	10.8333	16.2499	21.0166	23.0744	16.2496	22.7494	20.7995	28.5993	22.0994	20.4745
1456	10.4	16.2499	21.0166	22.7494	16.2496	22.4244	20.7995	28.2743	21.4495	20.1495
1457	11.2666	15.8166	21.0166	23.0744	16.2496	22.4244	20.4745	27.9493	21.1245	19.8245
1458	11.05	16.0333	21.0166	22.7494	16.5746	22.0994	20.1495	27.6243	21.4495	20.1495
1459	10.6166	16.2499	21.2333	23.0744	16.5746	22.4244	19.4995	27.9493	21.7745	20.1495
1460	10.6166	16.2499	21.0166	23.0744	16.5746	22.4244	19.8245	28.5993	21.1245	20.1495
1461	10.8333	16.0333	21.0166	23.0744	16.5746	22.4244	20.4745	28.2743	21.1245	20.1495
1462	10.8333	16.2499	21.2333	23.0744	16.8996	22.0994	20.1495	27.9493	21.4495	19.8245
1463	11.05	16.0333	21.0166	22.7494	16.8996	22.4244	20.1495	27.9493	20.7995	20.4745
1464	11.2666	15.8166	21.2333	23.0744	16.5746	22.0994	20.4745	27.9493	21.1245	20.4745
1465	11.05	16.0333	20.7999	22.7494	16.5746	22.4244	20.1495	27.6243	21.4495	20.1495
1466	10.1833	16.0333	21.0166	22.7494	16.8996	22.0994	20.4745	27.9493	21.4495	19.8245
1467	11.05	16.2499	20.7999	23.0744	16.5746	22.0994	20.1495	27.6243	21.4495	20.1495
1468	11.2666	16.2499	21.0166	23.0744	16.5746	22.4244	20.1495	28.2743	21.7745	20.1495
1469	11.05	16.4666	21.2333	23.0744	16.5746	22.4244	20.4745	27.9493	21.7745	19.8245
1470	11.05	16.0333	21.2333	23.0744	16.2496	22.4244	20.1495	28.2743	21.1245	20.1495
1471	10.8333	16.2499	20.7999	23.0744	16.5746	22.7494	19.8245	27.9493	21.7745	20.4745
1472	10.8333	16.0333	20.7999	22.7494	16.5746	22.4244	19.4995	27.9493	21.4495	20.1495
1473	11.05	16.2499	20.5833	23.0744	16.5746	22.4244	20.4745	27.9493	21.4495	19.8245
1474	10.8333	16.0333	21.0166	23.0744	16.5746	22.7494	20.1495	27.6243	21.4495	19.8245
1475	10.8333	16.0333	20.7999	23.0744	16.8996	22.0994	20.4745	27.9493	21.4495	19.8245
1476	10.1833	16.0333	21.4499	22.4244	16.8996	21.7745	20.1495	27.9493	21.1245	19.8245
1477	10.6166	16.0333	21.2333	23.0744	16.5746	23.0744	19.8245	27.9493	21.1245	19.8245
1478	10.6166	16.0333	21.2333	22.7494	16.8996	22.0994	20.1495	27.9493	21.4495	20.1495
1479	10.8333	16.0333	21.0166	22.4244	16.8996	22.4244	20.4745	27.9493	21.4495	20.1495
1480	11.05	16.0333	21.2333	23.0744	16.8996	22.7494	20.1495	27.6243	21.4495	19.8245
1481	11.05	15.8166	20.7999	23.0744	16.8996	22.4244	20.4745	27.6243	21.4495	20.4745
1482	11.2666	16.2499	21.2333	23.0744	16.5746	22.4244	19.8245	27.6243	21.4495	20.1495
1483	10.6166	16.0333	21.0166	23.0744	16.5746	22.7494	20.1495	27.9493	21.1245	20.1495
1484	10.4	16.0333	21.2333	22.7494	16.8996	22.7494	19.8245	27.2993	21.4495	20.1495
1485	10.6166	16.0333	20.7999	23.0744	16.8996	22.4244	20.4745	27.6243	21.4495	19.8245
1486	10.6166	16.0333	21.0166	23.0744	16.5746	22.7494	20.1495	27.9493	20.7995	19.8245
1487	10.8333	16.0333	21.2333	23.0744	16.8996	22.0994	19.8245	27.9493	21.7745	19.8245
1488	10.6166	16.2499	21.0166	23.0744	17.2246	22.4244	20.1495	27.9493	20.7995	19.8245
1489	10.1833	16.0333	21.2333	23.0744	16.8996	22.4244	20.1495	27.9493	20.7995	20.1495
1490	10.4	16.0333	21.4499	23.0744	16.5746	22.0994	20.1495	27.9493	21.1245	20.1495
1491	10.8333	16.0333	21.0166	23.0744	16.5746	22.0994	19.8245	28.5993	21.1245	20.1495
1492	10.6166	16.0333	21.0166	22.7494	16.8996	22.0994	20.1495	27.9493	21.7745	20.1495
1493	11.05	15.8166	21.2333	23.0744	16.8996	22.4244	19.8245	27.2993	21.1245	19.8245
1494	11.2666	16.2499	20.7999	23.0744	16.8996	22.7494	19.8245	27.6243	21.1245	20.4745
1495	10.1833	16.4666	21.0166	23.0744	16.8996	22.4244	20.1495	27.6243	20.7995	20.7995
1496	11.05	16.2499	21.0166	23.0744	16.8996	22.7494	20.1495	27.9493	21.4495	20.1495
1497	10.4	16.2499	21.2333	22.7494	16.5746	22.4244	19.8245	28.2743	21.4495	20.1495
1498	11.05	16.0333	21.0166	23.0744	17.2246	22.4244	20.4745	27.6243	21.4495	20.4745
1499	11.05	16.0333	20.7999	22.7494	17.2246	22.7494	20.1495	27.6243	21.1245	20.1495
1500	10.6166	16.0333	21.4499	23.0744	17.2246	22.7494	19.8245	27.9493	22.0994	20.1495
1501	11.05	16.2499	21.0166	23.0744	16.5746	22.7494	20.1495	27.9493	22.4244	20.4745
1502	11.05	16.2499	21.2333	23.0744	16.2496	22.4244	19.8245	27.6243	21.7745	20.4745
1503	10.8333	15.8166	21.0166	23.0744	16.5746	22.0994	20.1495	27.6243	22.0994	19.8245
1504	10.8333	16.0333	21.2333	23.0744	17.2246	22.4244	20.4745	27.9493	20.4745	19.8245
1505	10.8333	16.0333	21.2333	23.0744	17.2246	22.7494	20.1495	27.9493	22.4244	20.4745
1506	10.8333	16.2499	20.7999	23.0744	16.8996	22.4244	19.4995	27.2993	21.7745	20.1495
1507	11.05	15.8166	21.0166	23.0744	16.8996	22.7494	20.1495	27.9493	22.0994	20.4745
1508	10.8333	16.2499	21.0166	23.0744	16.5746	22.4244	19.8245	27.9493	22.0994	20.4745
1509	10.1833	15.8166	20.7999	23.0744	16.5746	22.7494	19.8245	27.9493	22.0994	20.4745
1510	11.2666	15.8166	21.2333	23.0744	16.5746	22.0994	20.1495	27.6243	21.7745	20.1495
1511	11.7	16.2499	21.2333	23.0744	16.5746	22.7494	19.8245	27.6243	22.4244	20.4745
1512	10.8333	16.2499	21.2333	22.7494	16.5746	22.0994	19.4995	27.9493	22.0994	20.4745
1513	10.8333	16.2499	21.0166	23.0744	16.5746	22.4244	20.1495	28.2743	22.0994	19.8245
1514	10.8333	16.0333	21.4499	23.0744	16.8996	22.0994	19.4995	27.9493	22.4244	19.8245
1515	10.4	16.0333	21.2333	23.0744	16.5746	22.0994	19.4995	28.2743	22.0994	20.1495
1516	10.8333	15.8166	21.4499	23.0744	16.8996	22.0994	19.8245	28.2743	22.4244	20.1495
1517	10.8333	16.0333	21.2333	23.0744	16.2496	22.0994	19.8245	28.5993	22.0994	20.1495
1518	10.8333	16.2499	21.2333	23.0744	16.5746	22.4244	19.8245	27.9493	22.0994	20.1495
1519	10.8333	16.2499	21.0166	23.0744	16.2496	22.0994	19.8245	27.9493	22.0994	20.1495
1520	10.6166	16.2499	21.2333	22.7494	16.5746	22.4244	20.1495	27.9493	22.4244	19.8245
1521	11.05	15.8166	21.2333	23.0744	16.5746	22.4244	20.1495	27.9493	22.4244	20.1495
1522	10.1833	16.2499	21.2333	23.0744	15.9246	22.0994	20.1495	27.9493	22.0994	20.1495
1523	11.05	15.8166	21.2333	22.7494	16.5746	21.7745	19.4995	27.9493	22.4244	19.8245
1524	11.2666	15.8166	21.2333	23.0744	16.2496	21.7745	20.1495	27.6243	22.0994	19.8245
1525	11.05	16.0333	21.2333	23.0744	16.5746	21.7745	20.4745	27.9493	22.0994	19.8245
1526	10.1833	16.0333	21.4499	22.7494	16.5746	22.0994	19.8245	27.6243	22.0994	19.8245
1527	10.6166	16.0333	21.2333	23.0744	16.2496	21.7745	20.1495	27.9493	22.0994	20.1495
1528	11.2666	16.0333	21.2333	23.0744	15.9246	22.4244	19.4995	27.9493	22.0994	20.1495
1529	10.6166	15.8166	21.2333	23.0744	16.8996	22.0994	19.8245	28.2743	22.0994	20.1495
1530	10.8333	16.0333	21.2333	23.0744	15.9246	22.4244	19.8245	27.9493	22.4244	19.8245
1531	10.6166	16.0333	21.2333	23.3994	16.2496	22.4244	20.4745	27.9493	22.0994	20.1495
1532	11.2666	16.0333	21.2333	23.0744	16.2496	22.4244	20.1495	27.9493	22.4244	20.1495
1533	11.2666	16.0333	21.2333	23.0744	16.2496	22.7494	20.4745	27.6243	22.4244	20.1495
1534	11.05	16.0333	21.2333	23.3994	16.5746	22.0994	20.1495	28.5993	22.0994	20.1495
1535	11.2666	16.2499	21.0166	23.3994	16.5746	22.4244	19.8245	28.5993	22.0994	20.1495
1536	11.05	16.0333	21.0166	23.3994	16.2496	22.7494	19.8245	28.2743	22.4244	20.4745
1537	11.05	16.0333	21.2333	23.0744	16.5746	22.7494	20.4745	27.9493	22.0994	20.1495
1538	10.8333	16.0333	20.7999	23.0744	16.5746	22.4244	20.4745	27.9493	22.0994	20.1495
1539	10.8333	16.0333	21.0166	23.3994	16.2496	21.7745	19.8245	28.2743	22.0994	20.1495
1540	10.8333	16.0333	20.7999	23.3994	16.2496	22.0994	20.4745	27.9493	22.4244	20.1495
1541	11.2666	16.0333	21.2333	23.3994	16.2496	22.0994	19.8245	27.9493	22.0994	20.4745
1542	10.6166	16.0333	21.2333	23.0744	15.9246	22.0994	19.8245	27.9493	22.0994	20.1495
1543	10.4	16.0333	21.0166	23.3994	16.5746	22.7494	20.1495	28.2743	22.4244	20.1495
1544	10.6166	16.0333	21.0166	23.3994	15.9246	22.4244	19.8245	27.6243	22.0994	20.1495
1545	11.05	16.2499	21.0166	23.3994	15.9246	22.0994	20.4745	27.9493	22.0994	20.1495
1546	11.2666	16.0333	21.0166	23.3994	16.2496	22.0994	20.4745	28.5993	22.0994	19.8245
1547	10.4	16.0333	21.0166	23.3994	16.2496	22.0994	20.4745	27.9493	22.0994	20.1495
1548	11.2666	16.0333	20.5833	23.3994	16.2496	22.4244	20.1495	27.9493	22.0994	19.8245
1549	10.8333	16.0333	21.0166	23.3994	15.9246	22.0994	19.8245	27.9493	22.0994	19.8245
1550	10.8333	16.0333	21.0166	23.3994	15.9246	21.7745	20.1495	27.9493	21.7745	19.8245
1551	10.6166	16.0333	21.2333	23.0744	15.9246	22.0994	20.1495	27.6243	22.0994	19.8245
1552	10.4	16.0333	20.5833	23.3994	16.5746	22.4244	19.4995	28.2743	22.0994	20.4745
1553	10.4	15.5999	20.7999	23.3994	15.9246	22.0994	20.1495	27.9493	21.7745	20.4745
1554	11.4833	16.0333	20.7999	23.0744	15.9246	22.4244	20.4745	27.9493	22.0994	20.1495
1555	11.2666	16.0333	20.5833	23.3994	15.9246	22.4244	20.1495	27.6243	22.0994	20.1495
1556	10.6166	16.2499	20.7999	23.3994	15.5996	22.4244	19.8245	28.9243	22.4244	19.8245
1557	11.2666	16.0333	20.7999	23.3994	15.9246	22.4244	20.1495	28.2743	22.0994	20.1495
1558	11.2666	16.2499	20.5833	23.0744	16.2496	22.0994	20.7995	27.9493	22.0994	20.1495
1559	10.8333	16.0333	21.0166	23.3994	15.9246	22.0994	20.1495	27.6243	22.0994	20.1495
1560	10.8333	16.0333	20.7999	23.0744	15.5996	21.7745	19.4995	28.2743	22.4244	20.1495
1561	10.8333	16.0333	20.7999	23.3994	15.9246	21.7745	19.8245	27.6243	22.4244	20.1495
1562	11.4833	16.2499	20.7999	23.0744	15.9246	22.0994	20.4745	28.2743	22.0994	19.8245
1563	11.05	16.0333	20.7999	23.0744	15.9246	21.7745	20.4745	28.2743	22.0994	20.1495
1564	11.2666	16.0333	20.7999	23.3994	16.2496	22.0994	20.4745	28.2743	22.0994	19.8245
1565	10.6166	16.0333	20.7999	23.0744	16.2496	22.0994	20.4745	28.2743	22.0994	19.8245
1566	11.2666	16.0333	20.7999	23.3994	16.2496	21.7745	20.4745	27.9493	22.0994	20.1495
1567	10.4	16.0333	20.7999	23.0744	15.2746	22.4244	20.4745	27.9493	22.0994	20.1495
1568	10.8333	16.0333	21.0166	23.0744	15.5996	22.0994	19.8245	27.9493	22.0994	20.1495
1569	11.4833	16.0333	20.7999	23.3994	15.9246	22.0994	20.4745	28.5993	22.0994	20.1495
1570	11.05	16.0333	20.7999	23.0744	16.2496	21.7745	20.1495	27.9493	21.7745	20.1495
1571	10.6166	16.2499	20.5833	23.3994	15.9246	22.0994	20.1495	27.9493	22.0994	20.1495
1572	11.4833	16.2499	20.7999	23.3994	15.5996	22.4244	20.1495	27.9493	22.4244	20.1495
1573	10.8333	16.2499	21.0166	23.0744	15.9246	22.0994	21.1245	28.2743	22.0994	20.1495
1574	11.2666	16.0333	20.7999	23.0744	15.9246	22.0994	20.4745	28.5993	22.0994	20.1495
1575	11.05	16.2499	20.7999	23.0744	15.9246	22.0994	20.1495	28.2743	22.0994	19.8245
1576	11.05	16.2499	20.7999	23.0744	15.9246	21.7745	20.1495	27.6243	21.7745	20.1495
1577	11.2666	16.2499	20.5833	23.0744	15.5996	21.7745	19.8245	28.2743	22.0994	20.1495
1578	11.05	16.2499	21.0166	23.3994	15.9246	22.0994	20.1495	27.9493	22.4244	20.1495
1579	10.8333	16.0333	20.7999	23.0744	15.9246	22.0994	20.1495	28.2743	22.0994	20.4745
1580	11.4833	16.2499	21.0166	23.3994	15.5996	21.7745	20.4745	27.9493	22.4244	20.1495
1581	11.4833	16.2499	21.0166	23.3994	15.9246	22.0994	20.1495	28.5993	21.7745	20.1495
1582	11.05	16.2499	20.5833	23.3994	16.2496	22.0994	19.4995	28.5993	21.7745	19.8245
1583	11.05	16.0333	20.7999	23.3994	15.9246	22.0994	20.7995	28.5993	22.0994	20.1495
1584	10.6166	16.4666	20.7999	23.3994	15.9246	21.7745	20.4745	28.2743	22.0994	20.1495
1585	11.05	16.0333	21.0166	23.0744	16.2496	22.0994	20.1495	27.9493	22.0994	20.1495
1586	10.6166	16.2499	21.2333	23.3994	15.2746	22.0994	20.4745	27.9493	22.0994	19.8245
1587	11.05	16.2499	21.0166	23.3994	15.9246	21.7745	20.1495	28.2743	22.0994	20.1495
1588	11.05	16.2499	21.0166	23.0744	15.5996	21.7745	20.4745	28.2743	22.0994	20.1495
1589	10.8333	16.0333	21.0166	23.0744	16.2496	21.7745	20.1495	28.5993	22.0994	20.7995
1590	11.2666	16.2499	21.2333	23.0744	16.2496	22.0994	20.4745	27.9493	21.7745	20.1495
1591	11.2666	16.2499	21.2333	23.3994	15.9246	22.0994	20.4745	28.2743	22.4244	20.1495
1592	11.05	16.2499	21.2333	23.0744	15.9246	22.4244	20.1495	28.2743	22.0994	20.1495
1593	11.05	16.0333	21.2333	23.0744	15.5996	22.4244	20.4745	28.2743	22.0994	20.1495
1594	10.6166	16.2499	21.0166	23.0744	16.2496	22.4244	20.1495	28.2743	22.0994	20.7995
1595	11.4833	16.0333	21.2333	23.0744	16.2496	22.4244	20.1495	28.5993	21.7745	20.4745
1596	11.2666	16.4666	20.7999	23.0744	16.5746	21.7745	20.7995	28.2743	22.0994	20.1495
1597	11.2666	16.2499	20.7999	23.3994	16.2496	22.0994	20.1495	28.2743	21.7745	19.8245
1598	11.2666	16.4666	21.0166	23.0744	16.2496	22.0994	20.1495	27.9493	22.4244	20.1495
1599	10.8333	16.2499	21.0166	23.0744	16.5746	21.7745	20.4745	28.5993	22.0994	20.1495
1600	10.8333	16.4666	20.7999	23.0744	16.2496	21.7745	21.1245	27.9493	22.0994	20.1495
1601	10.8333	16.4666	21.0166	23.0744	16.2496	22.0994	20.4745	28.2743	22.4244	20.1495
1602	10.8333	16.2499	21.0166	23.0744	16.2496	22.4244	20.1495	28.5993	22.0994	20.1495
1603	10.8333	16.4666	21.0166	23.0744	16.8996	21.7745	20.1495	28.2743	22.4244	20.4745
1604	11.2666	16.4666	21.0166	23.0744	16.8996	21.7745	19.8245	27.9493	22.4244	20.1495
1605	11.2666	16.4666	21.2333	23.3994	16.2496	22.0994	20.4745	27.9493	22.4244	20.1495
1606	10.8333	16.4666	20.7999	23.3994	16.2496	21.1245	20.4745	28.2743	22.4244	20.1495
1607	10.4	16.4666	21.0166	23.0744	16.2496	21.4495	20.1495	27.9493	22.4244	20.4745
1608	10.6166	16.4666	21.2333	23.0744	15.9246	21.7745	20.1495	28.5993	22.4244	20.4745
1609	10.8333	16.4666	21.0166	23.3994	15.9246	21.4495	20.1495	27.6243	22.0994	20.4745
1610	11.05	16.4666	20.7999	23.3994	15.9246	22.0994	20.4745	27.9493	22.4244	20.1495
1611	11.05	16.2499	21.2333	23.0744	15.9246	22.4244	20.1495	28.2743	22.0994	20.4745
1612	11.05	16.4666	21.0166	23.0744	16.5746	22.0994	20.7995	27.9493	22.0994	20.7995
1613	11.4833	16.6833	21.0166	23.0744	16.2496	22.0994	20.4745	27.9493	22.4244	20.4745
1614	11.4833	16.4666	21.0166	23.3994	16.2496	22.4244	20.4745	28.5993	22.0994	20.1495
1615	10.8333	16.4666	21.0166	23.0744	15.9246	21.7745	20.4745	28.2743	22.4244	20.7995
1616	10.6166	16.4666	21.0166	23.0744	16.2496	22.0994	20.1495	28.2743	22.4244	20.7995
1617	10.8333	16.4666	21.0166	23.0744	15.9246	22.0994	20.1495	28.2743	22.4244	20.7995
1618	11.2666	16.6833	20.7999	23.0744	16.2496	22.0994	20.1495	27.9493	22.4244	20.1495
1619	10.8333	16.6833	20.7999	23.0744	16.2496	22.4244	20.7995	28.5993	22.4244	20.4745
1620	10.6166	16.4666	21.0166	23.0744	15.5996	22.4244	20.4745	28.2743	22.4244	20.4745
1621	10.4	16.2499	21.0166	23.3994	16.2496	22.0994	19.8245	28.2743	22.4244	21.1245
1622	11.05	16.2499	21.0166	23.3994	15.9246	22.0994	20.4745	28.2743	22.4244	20.7995
1623	10.8333	16.2499	21.0166	23.0744	15.9246	22.4244	20.4745	28.2743	22.0994	20.4745
1624	10.8333	16.2499	21.0166	23.0744	15.9246	22.0994	20.4745	28.2743	21.7745	20.1495
1625	11.05	16.4666	20.7999	23.0744	15.9246	22.4244	20.4745	28.5993	22.0994	20.4745
1626	11.05	16.4666	21.0166	23.0744	15.9246	22.0994	20.1495	27.9493	22.0994	20.7995
1627	11.05	16.4666	20.7999	23.0744	16.2496	22.4244	20.1495	27.6243	22.0994	20.4745
1628	10.8333	16.2499	21.0166	23.3994	16.2496	22.4244	20.1495	28.2743	22.4244	20.4745
1629	10.8333	16.4666	21.0166	23.0744	16.5746	22.7494	20.4745	28.2743	22.0994	20.4745
1630	11.2666	16.4666	21.0166	23.3994	16.2496	22.7494	19.8245	27.9493	21.7745	20.4745
1631	11.05	16.2499	20.7999	23.3994	16.2496	22.4244	20.4745	27.9493	21.7745	20.1495
1632	11.2666	16.0333	21.2333	23.0744	15.9246	22.7494	20.7995	28.2743	21.7745	20.4745
1633	10.6166	16.2499	21.0166	23.0744	15.9246	22.4244	20.1495	28.5993	22.0994	20.4745
1634	11.4833	16.2499	21.0166	23.0744	16.2496	22.4244	20.4745	28.2743	21.7745	20.1495
1635	10.4	16.2499	21.0166	23.0744	16.2496	22.7494	20.1495	27.9493	22.0994	20.4745
1636	10.8333	16.4666	21.0166	23.3994	15.9246	22.4244	21.1245	27.9493	21.7745	20.4745
1637	10.8333	16.2499	20.7999	23.0744	16.2496	22.0994	20.7995	27.9493	22.0994	20.7995
1638	11.2666	16.4666	21.0166	23.0744	16.5746	22.4244	20.1495	27.6243	21.7745	20.4745
1639	10.8333	16.2499	20.7999	23.0744	16.2496	22.0994	20.4745	28.2743	21.7745	20.7995
1640	11.05	16.4666	21.0166	23.0744	16.2496	22.0994	20.7995	28.5993	22.0994	20.1495
1641	10.6166	16.2499	21.0166	23.0744	15.9246	21.7745	20.1495	27.9493	21.7745	20.1495
1642	10.6166	16.4666	21.2333	23.0744	16.2496	22.4244	20.4745	28.2743	22.0994	20.4745
1643	10.8333	16.2499	21.0166	23.0744	16.2496	22.0994	21.1245	28.2743	21.7745	20.1495
1644	11.05	16.2499	21.0166	23.0744	16.2496	22.0994	20.4745	28.2743	21.7745	20.4745
1645	11.2666	16.2499	20.7999	23.0744	16.5746	22.4244	20.1495	28.2743	21.7745	19.4995
1646	10.8333	16.2499	21.0166	23.0744	16.2496	22.4244	19.8245	27.9493	21.7745	20.1495
1647	10.8333	16.0333	21.0166	23.0744	16.2496	22.0994	20.1495	28.2743	21.7745	20.4745
1648	10.6166	16.2499	21.0166	23.3994	16.5746	21.7745	20.1495	27.6243	22.0994	20.4745
1649	11.05	16.2499	21.2333	23.0744	16.2496	22.4244	20.4745	28.2743	21.7745	19.8245
1650	10.4	16.2499	20.7999	23.3994	16.5746	21.7745	20.1495	27.9493	22.0994	19.8245
1651	11.05	16.2499	21.2333	23.3994	16.2496	22.0994	20.4745	28.2743	22.0994	20.1495
1652	10.6166	16.0333	21.0166	23.3994	16.5746	22.4244	19.8245	27.9493	21.7745	20.1495
1653	11.05	16.2499	20.7999	23.0744	16.5746	22.0994	20.7995	27.9493	22.0994	20.1495
1654	10.8333	16.2499	21.2333	23.0744	16.5746	22.4244	20.7995	28.2743	21.7745	20.1495
1655	10.1833	16.2499	20.7999	23.0744	16.2496	22.0994	20.7995	28.2743	21.7745	20.1495
1656	10.8333	16.2499	21.0166	23.0744	16.2496	22.0994	20.1495	27.9493	21.7745	20.1495
1657	11.05	16.4666	21.0166	23.0744	16.2496	22.0994	20.4745	28.2743	21.7745	20.4745
1658	11.05	16.2499	21.0166	23.3994	16.5746	22.4244	20.4745	28.2743	21.7745	20.1495
1659	11.05	16.2499	21.0166	23.0744	16.2496	22.0994	20.4745	28.2743	21.7745	20.1495
1660	11.05	16.0333	21.0166	23.0744	16.2496	22.4244	20.1495	28.2743	22.0994	20.1495
1661	10.8333	16.2499	20.7999	23.0744	16.5746	21.7745	20.4745	28.2743	22.0994	20.1495
1662	11.2666	16.2499	21.0166	23.0744	16.5746	22.0994	20.4745	28.2743	21.7745	20.1495
1663	11.2666	16.4666	21.2333	23.3994	16.2496	22.4244	20.4745	27.9493	21.7745	20.1495
1664	10.6166	16.0333	20.7999	23.0744	16.2496	22.4244	20.4745	28.5993	21.7745	20.4745
1665	10.8333	16.0333	20.7999	23.0744	16.5746	22.0994	20.4745	27.6243	22.0994	20.1495
1666	11.05	16.2499	21.0166	23.0744	16.5746	22.4244	20.7995	27.9493	22.0994	20.1495
1667	11.2666	16.4666	21.0166	23.0744	16.5746	22.4244	20.1495	27.9493	22.0994	20.4745
1668	11.05	16.4666	21.0166	23.0744	16.5746	22.0994	20.4745	27.9493	21.7745	20.1495
1669	11.05	16.2499	21.0166	23.0744	16.5746	22.4244	20.4745	28.2743	22.0994	20.4745
1670	11.05	16.4666	21.0166	23.3994	16.2496	22.7494	20.4745	28.2743	22.0994	20.1495
1671	11.05	16.2499	20.7999	23.0744	16.2496	22.4244	20.4745	28.2743	21.7745	20.4745
1672	10.6166	16.0333	20.7999	23.0744	16.2496	22.4244	20.1495	27.9493	21.7745	20.1495
1673	10.8333	16.2499	20.7999	23.0744	16.2496	22.4244	20.7995	27.9493	22.4244	20.1495
1674	11.05	16.2499	21.0166	23.0744	16.2496	22.4244	20.4745	28.2743	22.0994	19.8245
1675	11.2666	16.2499	21.0166	23.0744	16.2496	22.4244	20.7995	28.2743	22.0994	20.1495
1676	11.05	16.4666	21.2333	23.0744	16.2496	22.4244	20.7995	27.9493	21.7745	19.8245
1677	11.05	16.4666	21.0166	23.0744	16.2496	22.4244	20.1495	28.2743	22.0994	20.4745
1678	11.05	16.2499	21.0166	23.0744	16.2496	22.0994	20.7995	27.6243	22.4244	20.1495
1679	11.2666	16.4666	21.0166	23.3994	16.2496	22.0994	20.4745	27.9493	22.0994	19.8245
1680	11.2666	16.2499	20.7999	23.0744	16.2496	22.4244	20.7995	28.2743	22.0994	19.8245
1681	10.4	16.4666	21.0166	23.0744	16.2496	22.0994	20.1495	27.9493	22.0994	19.8245
1682	10.8333	16.2499	21.0166	23.3994	16.5746	22.0994	20.1495	27.9493	22.0994	20.1495
1683	11.05	16.2499	21.0166	23.3994	16.5746	23.0744	20.4745	27.9493	21.7745	20.1495
1684	10.6166	16.2499	20.7999	23.0744	15.9246	22.4244	20.1495	27.9493	22.0994	20.1495
1685	11.05	16.4666	21.0166	23.0744	16.2496	23.0744	20.1495	27.9493	22.0994	20.4745
1686	10.6166	16.4666	21.0166	23.0744	16.5746	22.7494	20.4745	27.6243	22.7494	20.4745
1687	11.05	16.2499	21.0166	23.3994	16.2496	22.4244	20.7995	28.5993	22.0994	20.1495
1688	10.4	16.0333	21.0166	23.0744	16.2496	22.4244	20.7995	27.6243	22.4244	20.4745
1689	10.6166	16.2499	20.7999	23.0744	16.2496	22.7494	20.7995	27.9493	21.7745	20.4745
1690	10.8333	16.2499	20.7999	23.0744	16.2496	22.0994	20.4745	28.2743	21.7745	20.4745
1691	10.8333	16.2499	21.0166	23.0744	16.2496	22.4244	20.7995	27.6243	21.7745	20.4745
1692	11.7	16.2499	20.7999	23.0744	16.2496	22.4244	20.7995	28.2743	21.7745	20.1495
1693	10.4	16.4666	21.2333	23.3994	16.2496	22.0994	20.7995	27.6243	22.0994	20.4745
1694	10.8333	16.2499	20.7999	23.0744	16.5746	22.4244	20.7995	27.9493	22.0994	20.4745
1695	10.4	16.2499	21.0166	23.0744	16.2496	22.4244	20.7995	28.2743	22.0994	20.4745
1696	10.8333	16.4666	20.7999	23.0744	16.2496	22.4244	20.7995	28.2743	22.0994	20.1495
1697	11.2666	16.2499	20.7999	23.0744	16.5746	22.4244	20.7995	28.2743	22.0994	19.8245
1698	10.8333	16.2499	20.7999	23.3994	16.5746	22.0994	20.7995	27.9493	22.0994	20.1495
1699	11.05	16.2499	20.7999	23.3994	16.2496	22.0994	20.7995	28.5993	22.4244	20.1495
1700	10.4	16.2499	21.0166	23.0744	16.5746	22.7494	21.1245	27.6243	22.0994	20.1495
1701	11.2666	16.2499	20.7999	23.0744	16.5746	22.0994	20.4745	27.6243	22.0994	20.1495
1702	11.4833	16.2499	20.7999	23.0744	16.2496	22.0994	20.7995	27.9493	22.4244	20.1495
1703	10.8333	16.2499	20.7999	23.0744	15.9246	22.4244	20.4745	28.2743	22.0994	19.8245
1704	11.05	16.2499	20.7999	23.0744	16.5746	21.7745	19.8245	28.5993	22.0994	20.1495
1705	10.8333	16.2499	20.7999	23.0744	16.5746	21.7745	20.7995	28.2743	22.0994	20.4745
1706	11.05	16.4666	20.7999	23.0744	16.5746	22.0994	20.4745	27.9493	22.4244	19.8245
1707	11.05	16.2499	20.7999	23.0744	16.2496	22.0994	20.1495	28.2743	21.7745	19.8245
1708	10.6166	16.2499	20.7999	23.0744	16.5746	22.0994	21.1245	27.6243	22.4244	20.1495
1709	11.2666	16.2499	20.7999	23.0744	16.5746	22.0994	20.1495	28.2743	22.4244	20.1495
1710	10.8333	16.4666	21.0166	23.0744	16.2496	21.7745	20.4745	28.5993	22.4244	20.1495
1711	10.6166	16.4666	20.7999	23.0744	16.2496	22.0994	21.1245	28.5993	22.0994	20.1495
1712	10.6166	16.4666	20.7999	23.0744	16.5746	22.0994	19.8245	28.5993	22.0994	19.8245
1713	10.8333	16.2499	20.7999	23.0744	16.5746	21.7745	20.7995	28.5993	22.0994	20.1495
1714	11.4833	16.2499	20.7999	23.0744	16.2496	22.0994	20.7995	27.9493	22.0994	20.1495
1715	11.4833	16.2499	20.7999	23.0744	16.5746	22.0994	21.4495	27.9493	22.4244	20.1495
1716	11.2666	16.2499	20.7999	23.0744	16.5746	22.0994	20.7995	27.9493	22.4244	20.7995
1717	11.2666	16.2499	20.7999	23.0744	16.2496	21.7745	20.7995	28.9243	21.7745	20.4745
1718	10.8333	16.2499	20.7999	23.0744	16.2496	21.7745	20.4745	28.2743	22.0994	20.4745
1719	10.6166	16.0333	21.0166	23.0744	16.5746	21.4495	20.7995	27.2993	22.4244	20.1495
1720	11.05	16.2499	21.0166	23.0744	16.2496	21.7745	20.7995	28.2743	22.7494	20.4745
1721	11.2666	16.2499	21.0166	23.0744	16.2496	22.0994	20.4745	28.2743	21.7745	20.1495
1722	11.4833	16.2499	21.0166	23.0744	16.2496	22.0994	20.4745	28.2743	22.4244	20.1495
1723	10.8333	16.4666	20.7999	23.0744	16.2496	21.7745	20.1495	28.2743	22.0994	20.1495
1724	11.05	16.4666	20.7999	23.0744	16.2496	21.7745	20.4745	27.9493	22.4244	20.1495
1725	11.05	16.0333	20.7999	23.0744	16.2496	21.7745	20.4745	27.6243	22.0994	20.1495
1726	10.8333	16.2499	20.7999	23.0744	16.5746	21.7745	20.7995	28.2743	22.0994	20.1495
1727	11.4833	16.2499	21.2333	23.0744	16.5746	22.0994	20.1495	27.6243	22.7494	20.1495
1728	10.8333	16.2499	21.0166	23.0744	16.2496	22.0994	20.7995	28.2743	22.7494	20.1495
1729	10.8333	16.0333	21.0166	23.0744	16.5746	21.7745	20.4745	27.9493	22.7494	19.8245
1730	10.8333	16.2499	20.7999	23.0744	16.5746	21.7745	20.4745	27.9493	22.7494	19.8245
1731	10.6166	16.2499	21.0166	23.0744	16.8996	22.0994	20.4745	28.2743	22.7494	19.8245
1732	11.05	16.0333	20.7999	23.0744	16.5746	22.0994	20.1495	28.2743	22.4244	19.8245
1733	10.6166	16.4666	21.0166	23.3994	16.2496	21.7745	20.7995	28.9243	22.7494	19.8245
1734	11.05	16.2499	20.7999	23.0744	16.5746	22.0994	20.1495	27.9493	22.0994	19.8245
1735	11.05	16.4666	20.7999	23.0744	16.2496	22.0994	20.1495	28.5993	22.0994	20.1495
1736	11.05	16.0333	20.7999	23.0744	16.8996	22.0994	20.4745	28.2743	22.0994	19.8245
1737	11.4833	16.2499	21.0166	23.0744	16.2496	22.4244	20.4745	28.5993	22.4244	19.8245
1738	10.6166	16.2499	20.7999	23.0744	16.5746	22.4244	20.4745	28.2743	23.0744	19.8245
1739	11.05	16.4666	20.7999	23.0744	16.2496	22.0994	20.4745	28.5993	22.7494	20.1495
1740	10.4	16.0333	20.7999	23.0744	16.2496	22.0994	20.4745	28.5993	22.4244	19.8245
1741	11.05	16.4666	21.0166	23.0744	16.8996	21.4495	20.4745	28.5993	22.0994	19.8245
1742	11.05	16.4666	20.7999	23.0744	16.5746	22.0994	20.7995	28.2743	22.7494	20.1495
1743	11.2666	16.4666	21.0166	23.0744	16.8996	21.7745	20.7995	28.5993	22.7494	20.1495
1744	11.2666	16.4666	20.7999	23.0744	16.5746	21.7745	20.4745	28.2743	22.7494	20.1495
1745	11.05	16.2499	20.7999	23.0744	16.2496	22.0994	20.1495	28.5993	23.0744	20.1495
1746	11.2666	16.2499	20.7999	23.0744	16.5746	21.7745	20.4745	28.5993	23.0744	19.8245
1747	11.05	16.2499	20.7999	23.0744	16.2496	22.0994	20.7995	28.2743	22.7494	20.1495
1748	11.2666	16.2499	20.7999	23.0744	16.2496	22.0994	20.4745	28.2743	22.7494	20.1495
1749	10.8333	16.2499	20.7999	23.0744	16.5746	22.7494	20.4745	28.5993	23.0744	20.1495
1750	10.6166	16.4666	20.7999	23.0744	16.2496	22.0994	20.4745	28.2743	22.4244	20.1495
1751	11.05	16.2499	20.7999	23.3994	16.5746	22.0994	20.7995	27.9493	22.0994	19.8245
1752	11.2666	16.2499	20.7999	23.3994	16.2496	22.7494	19.8245	27.9493	22.4244	20.1495
1753	10.8333	16.2499	20.7999	23.3994	16.2496	22.0994	20.1495	28.2743	22.7494	20.1495
1754	11.05	16.2499	20.7999	23.3994	16.8996	22.0994	19.8245	28.5993	22.4244	20.1495
1755	10.8333	16.4666	20.7999	23.3994	16.5746	21.7745	20.7995	28.5993	22.7494	20.4745
1756	10.8333	16.0333	20.7999	23.3994	16.5746	22.0994	20.4745	27.9493	22.7494	19.8245
1757	11.05	16.2499	20.7999	23.3994	16.2496	22.0994	20.7995	28.2743	22.7494	20.1495
1758	11.05	16.2499	20.7999	23.3994	16.2496	22.0994	20.4745	28.2743	22.4244	20.1495
1759	11.2666	16.2499	20.7999	23.3994	16.2496	22.4244	20.4745	28.2743	22.7494	19.8245
1760	11.2666	16.2499	20.7999	23.3994	16.5746	22.4244	20.7995	28.5993	23.0744	19.8245
1761	10.8333	16.2499	20.7999	23.3994	16.5746	22.4244	20.4745	28.5993	22.4244	19.8245
1762	10.4	16.2499	20.7999	23.3994	16.2496	22.4244	20.7995	28.2743	22.0994	19.4995
1763	10.8333	16.2499	21.0166	23.3994	16.2496	22.4244	20.4745	28.2743	22.7494	19.4995
1764	10.1833	16.2499	20.7999	23.3994	16.2496	22.4244	20.4745	28.5993	23.0744	20.1495
1765	11.2666	16.2499	20.7999	23.3994	16.2496	22.0994	20.4745	28.2743	22.0994	20.1495
1766	10.6166	16.2499	20.7999	23.3994	16.2496	22.4244	20.4745	28.2743	22.7494	20.1495
1767	10.4	16.2499	20.7999	23.3994	16.5746	22.7494	20.4745	27.9493	22.4244	19.8245
1768	10.6166	16.4666	20.7999	23.3994	16.2496	22.4244	20.4745	28.2743	22.7494	19.8245
1769	11.2666	16.2499	20.7999	23.3994	16.2496	22.7494	20.1495	28.2743	22.4244	20.1495
1770	10.8333	16.4666	20.7999	23.3994	16.2496	22.4244	20.4745	28.2743	22.4244	20.1495
1771	11.2666	16.2499	20.7999	23.3994	16.2496	22.4244	20.4745	28.2743	23.0744	20.1495
1772	11.05	16.2499	20.7999	23.3994	16.2496	22.0994	20.7995	28.2743	22.4244	20.1495
1773	11.05	16.0333	20.7999	23.3994	16.2496	22.0994	20.7995	28.2743	23.0744	20.1495
1774	11.4833	16.2499	20.7999	23.3994	16.5746	22.0994	20.4745	28.5993	22.4244	19.8245
1775	11.05	16.2499	20.7999	23.3994	16.2496	22.0994	20.1495	28.9243	23.0744	19.4995
1776	10.8333	16.2499	20.7999	23.3994	16.2496	22.0994	20.1495	28.2743	22.7494	19.8245
1777	10.8333	16.4666	20.5833	23.3994	16.5746	21.7745	20.4745	28.5993	22.7494	19.8245
1778	10.6166	16.2499	20.7999	23.3994	16.5746	22.0994	20.7995	28.2743	22.7494	19.8245
1779	10.8333	16.2499	20.7999	23.3994	16.2496	22.4244	21.1245	28.5993	22.7494	19.8245
1780	10.6166	16.2499	20.7999	23.3994	16.5746	22.0994	20.4745	28.2743	23.3994	19.8245
1781	11.2666	16.2499	20.7999	23.3994	16.5746	21.7745	20.4745	27.9493	23.0744	20.1495
1782	11.05	16.0333	20.7999	23.3994	16.5746	22.0994	20.4745	28.2743	22.7494	19.8245
1783	10.6166	16.4666	21.0166	23.3994	16.8996	21.7745	20.1495	28.2743	22.7494	19.4995
1784	10.6166	16.2499	20.7999	23.3994	16.5746	22.4244	20.1495	28.5993	22.4244	20.1495
1785	10.8333	16.2499	20.7999	23.3994	16.5746	22.0994	20.7995	28.5993	23.3994	20.1495
1786	11.05	16.2499	20.7999	23.3994	16.5746	22.4244	20.1495	27.9493	22.7494	20.1495
1787	11.05	16.2499	20.7999	23.3994	16.2496	22.0994	20.7995	28.5993	23.0744	20.1495
1788	11.05	16.2499	21.0166	23.3994	16.5746	22.0994	20.4745	28.2743	22.4244	19.8245
1789	11.2666	16.2499	21.0166	23.3994	16.5746	21.7745	20.7995	28.2743	22.0994	20.1495
1790	11.05	16.2499	20.7999	23.3994	16.5746	22.0994	20.1495	28.5993	22.4244	20.4745
1791	10.4	16.2499	21.0166	23.3994	16.2496	22.0994	20.7995	28.2743	22.7494	20.1495
1792	10.6166	16.2499	20.7999	23.3994	16.2496	22.0994	21.1245	28.5993	23.0744	20.1495
1793					16.5746	22.4244	20.4745	28.2743	23.0744	20.1495
1794					16.2496	22.4244	20.1495	28.2743	23.3994	20.1495
1795					16.5746	22.4244	20.7995	28.2743	23.0744	20.1495
1796					16.2496	22.7494	21.1245	27.9493	22.7494	19.4995
1797					16.2496	22.4244	21.4495	27.6243	23.3994	19.4995
1798					16.2496	22.7494	20.1495	28.5993	22.7494	19.8245
1799					16.2496	22.7494	20.4745	28.2743	23.0744	20.1495
	BGBV-075_0000	BGBV-106_0000	BGBV-117_0000	BGBV-134_0000	BGBV-253_0000	BGBV-333_0000	BGBV-334_0000	BGBV-355_0000	BGBV-407_0000	BGBV-417_0000
Pulse	10s;20hz;5ms	10s;20hz;5ms	10s;20hz;5ms	10s;20hz;5ms	10s;20hz;5ms	10s;20hz;5ms	10s;20hz;5ms	10s;20hz;5ms	10s;20hz;5ms	10s;20hz;5ms
LED	0.2	0.2	0.2	0.1	0.1	0.1	0.1	0.1	0.1	0.1
Layer	I	I	I	I	I	I	I	I	I	I
Min (ctrl)	12.35	18.6333	21.0166	23.7244	15.9246	22.7494	20.7995	26.3243	23.3994	19.1745
Max (ctrl)	12.7833	19.0666	21.4499	24.3744	16.5746	24.0494	22.0994	27.2993	24.3744	19.8245
Mean (ctrl)	12.5946	18.808	21.2892	24.0599	16.3125	23.0744	21.3736	26.88	24.0704	19.4471
sd (ctrl)	0.165405	0.15238	0.111434	0.102217	0.212605	0.283064	0.27896	0.280744	0.250834	0.147666
1.960*sd	0.324194	0.298665	0.21841	0.200346	0.416705	0.554806	0.546762	0.550259	0.491634	0.289426
2.576*sd	0.426083	0.392531	0.287053	0.263312	0.547669	0.729173	0.718601	0.723197	0.646148	0.380389
t0 (Opto) (sec.)	31	31	31	31	32	33	33	31	32	33
CV	0.013133	0.00810187	0.00523429	0.00424846	0.0130332	0.0122674	0.0130516	0.0104444	0.0104209	0.00759324
Neurovascular response	Vc	Vc	Vc	Vc	Vc-Vd		Vc	Vc-Vd	Vc	Vc-Vd
Onset contraction (3 points) (sec.)
Max-contraction (3 points)
Magnitude contraction (3points)
duration contraction (3 points)
Onset dilation (3 points) (sec.)
Max-dilation (3 points)
Magnitude dilation (3points)
Max-dilatation
Max-contraction
t Max-contraction
DContraction
Contraction K+
Sexe
Age

## Sheet: TTX
Stimulation	Couche I-II
Time	BGBV-074_0000	BGBV-083_0000	BGBV-266_0001	BGBV-267_0001	BGBV-270_0001	BGBV-271_0001
0	14.0833	15.5999	19.1745	19.1745	12.0247	19.1745
1	14.3	15.3833	20.1495	19.1745	12.3497	19.1745
2	14.0833	15.5999	20.1495	18.8495	12.0247	18.5245
3	13.8666	15.5999	20.1495	19.1745	12.0247	19.1745
4	14.3	15.5999	19.4995	18.8495	11.6997	19.1745
5	14.0833	15.5999	20.1495	19.1745	11.3747	18.8495
6	14.0833	15.5999	19.4995	19.1745	11.6997	18.8495
7	14.0833	15.5999	19.8245	19.1745	12.0247	19.1745
8	14.5166	15.3833	20.1495	19.1745	11.6997	18.8495
9	14.0833	15.5999	20.1495	18.8495	12.3497	18.8495
10	14.0833	15.5999	19.8245	19.1745	12.0247	18.8495
11	14.0833	15.5999	19.8245	18.8495	11.6997	19.1745
12	14.0833	15.3833	20.1495	18.8495	12.0247	18.8495
13	14.0833	15.5999	19.8245	19.1745	12.0247	18.8495
14	13.8666	15.5999	19.8245	19.1745	11.6997	18.8495
15	14.3	15.5999	19.8245	19.1745	11.6997	18.8495
16	14.0833	15.3833	19.8245	19.1745	12.0247	18.8495
17	14.0833	15.5999	20.1495	18.8495	12.0247	18.8495
18	13.8666	15.5999	19.8245	18.8495	12.0247	18.8495
19	14.3	15.5999	19.4995	18.8495	11.6997	18.8495
20	14.0833	15.5999	19.8245	18.5245	12.0247	18.8495
21	14.0833	15.5999	19.8245	18.8495	12.0247	18.8495
22	14.3	15.5999	19.8245	18.8495	12.0247	18.8495
23	14.0833	15.5999	19.4995	18.8495	12.0247	18.8495
24	13.8666	15.8166	19.8245	18.8495	12.0247	18.8495
25	14.0833	15.5999	20.1495	18.8495	12.0247	18.8495
26	14.0833	15.8166	19.8245	18.8495	12.0247	18.8495
27	14.3	15.5999	19.8245	19.1745	12.0247	18.8495
28	14.0833	15.5999	20.1495	19.1745	12.3497	18.8495
29	14.3	15.5999	19.8245	18.8495	12.0247	18.8495
30	13.8666	15.5999	19.8245	19.1745	12.0247	18.5245
31			19.4995	19.1745	11.6997	19.1745
32			19.4995	18.8495	12.0247	18.8495
33			20.1495	19.1745	12.0247	18.8495
34			19.4995	19.4995	12.0247	18.5245
35			19.8245	18.8495	12.0247	18.8495
36			19.8245	19.1745	12.0247	18.8495
37			20.1495	18.8495	12.3497	18.8495
38			20.4745	19.1745	11.6997	19.1745
39			19.8245	19.1745	12.0247	18.8495
40			19.8245	19.1745	11.6997	18.8495
41	14.0833	15.5999	20.1495	19.1745	12.0247	18.8495
42	14.0833	15.8166	19.4995	18.8495	12.3497	18.8495
43	13.8666	15.8166	20.1495	18.5245	12.0247	18.8495
44	14.3	15.5999	19.4995	19.1745	11.6997	19.1745
45	13.8666	15.5999	20.1495	19.1745	12.0247	18.8495
46	14.0833	15.5999	20.1495	19.1745	12.3497	19.1745
47	14.0833	15.5999	19.8245	18.8495	12.0247	19.1745
48	13.8666	15.5999	20.1495	19.1745	12.3497	19.1745
49	13.8666	15.8166	19.4995	18.8495	12.3497	18.8495
50	13.8666	15.8166	19.8245	19.1745	12.3497	18.8495
51	13.8666	15.5999	20.1495	19.1745	12.3497	19.1745
52	13.8666	15.5999	20.1495	19.1745	12.3497	18.8495
53	14.0833	15.5999	20.1495	19.1745	12.3497	19.1745
54	14.0833	15.5999	19.8245	19.1745	12.3497	19.1745
55	13.8666	15.5999	20.1495	19.1745	12.0247	18.8495
56	13.8666	15.8166	20.1495	18.8495	12.3497	18.8495
57	14.0833	15.5999	19.8245	19.1745	12.3497	19.1745
58	14.0833	15.5999	19.8245	19.1745	12.0247	18.8495
59	13.8666	15.5999	20.1495	19.1745	12.3497	19.4995
60	14.0833	15.8166	20.1495	19.1745	12.3497	18.8495
61	14.0833	15.5999	19.4995	18.8495	12.3497	18.8495
62	13.8666	15.5999	19.8245	18.8495	12.3497	18.8495
63	14.0833	15.5999	19.8245	19.1745	12.3497	19.1745
64	14.3	15.5999	20.1495	18.8495	12.3497	19.1745
65	14.0833	15.5999	19.8245	19.1745	12.3497	18.8495
66	14.0833	15.5999	19.8245	19.1745	12.0247	19.1745
67	13.8666	15.8166	20.1495	18.5245	12.3497	19.1745
68	13.8666	15.5999	20.1495	19.1745	12.3497	19.1745
69	13.8666	15.5999	19.8245	19.1745	12.3497	19.1745
70	14.0833	15.5999	19.8245	19.1745	12.3497	18.8495
71	14.0833	15.8166	20.1495	19.1745	12.3497	18.8495
72	14.5166	15.5999	19.8245	18.8495	12.0247	18.8495
73	14.0833	15.5999	20.1495	18.8495	12.3497	18.8495
74	14.5166	15.8166	19.8245	18.8495	12.3497	18.8495
75	14.0833	15.5999	19.8245	19.1745	12.3497	18.8495
76	14.0833	15.5999	20.1495	18.8495	12.3497	18.8495
77	14.0833	15.8166	19.4995	19.1745	12.3497	18.8495
78	14.3	15.8166	20.1495	19.1745	12.3497	18.8495
79	14.0833	15.5999	20.1495	18.8495	12.6747	18.8495
80	14.3	15.5999	19.8245	19.1745	12.6747	18.8495
81	14.0833	15.5999	19.8245	19.1745	12.3497	18.8495
82	14.0833	15.8166	19.8245	18.8495	12.6747	18.5245
83	14.0833	15.8166	19.8245	19.4995	12.6747	18.8495
84	14.3	15.8166	20.1495	18.8495	12.6747	19.1745
85	14.0833	15.5999	20.1495	19.1745	12.6747	19.1745
86	14.3	15.3833	19.8245	19.1745	12.6747	19.1745
87	14.0833	15.5999	20.4745	19.1745	12.3497	18.8495
88	14.0833	15.5999	19.8245	19.1745	12.3497	18.8495
89	14.5166	15.5999	19.4995	18.5245	12.3497	19.1745
90	14.0833	15.5999	20.1495	18.8495	12.3497	19.1745
91	14.0833	15.5999	19.4995	18.8495	12.0247	19.4995
92	14.3	16.0333	19.8245	18.5245	12.3497	18.8495
93	14.0833	15.3833	19.4995	18.1995	12.3497	18.8495
94	14.3	15.8166	19.8245	18.8495	12.3497	19.4995
95	14.0833	15.5999	19.8245	19.1745	12.3497	18.8495
96	13.8666	15.8166	19.8245	19.1745	12.3497	19.1745
97	14.0833	15.8166	19.8245	18.8495	12.3497	18.8495
98	14.3	15.3833	20.1495	18.8495	12.0247	19.1745
99	14.3	15.5999	20.1495	19.1745	12.0247	19.1745
100	14.0833	15.5999	19.8245	18.8495	12.3497	19.1745
101	14.0833	15.8166	20.1495	18.8495	12.0247	18.8495
102	14.0833	15.5999	19.8245	18.8495	12.0247	19.1745
103	14.3	15.8166	20.1495	18.8495	11.6997	18.8495
104	14.3	15.8166	19.8245	18.8495	12.0247	18.8495
105	14.3	15.8166	20.1495	18.5245	12.0247	19.1745
106	14.3	15.5999	20.1495	18.5245	12.0247	19.1745
107	14.0833	15.5999	20.1495	18.8495	11.6997	19.4995
108	14.0833	15.5999	19.4995	18.8495	11.6997	18.8495
109	14.0833	15.5999	19.8245	18.5245	12.0247	19.1745
110	14.0833	15.8166	20.1495	18.5245	11.6997	18.8495
111	14.3	15.8166	20.1495	18.8495	11.6997	18.8495
112	14.0833	15.5999	20.4745	18.5245	12.0247	18.8495
113	14.0833	15.5999	20.1495	18.5245	12.0247	18.8495
114	13.8666	15.5999	20.1495	18.8495	12.0247	18.8495
115	14.3	15.8166	20.1495	18.8495	12.0247	19.1745
116	13.8666	15.8166	20.1495	18.1995	12.0247	18.8495
117	14.3	15.8166	19.8245	18.5245	12.0247	18.8495
118	13.8666	15.8166	20.4745	18.8495	12.0247	18.8495
119	14.0833	15.3833	19.8245	18.8495	11.6997	18.8495
120	14.0833	15.8166	20.1495	18.8495	11.6997	19.1745
121	14.0833	15.5999	19.4995	18.8495	12.0247	19.1745
122	13.8666	16.0333	19.8245	18.1995	12.0247	19.1745
123	14.0833	15.8166	19.8245	18.8495	12.3497	19.4995
124	14.0833	15.8166	20.1495	18.5245	12.0247	19.1745
125	14.0833	15.8166	20.1495	18.8495	12.0247	19.4995
126	14.0833	15.8166	19.8245	18.8495	12.0247	19.4995
127	14.3	15.5999	19.8245	18.5245	12.0247	19.1745
128	14.3	15.8166	19.8245	18.5245	12.0247	18.8495
129	13.8666	15.8166	20.1495	18.8495	12.0247	18.8495
130	14.0833	15.5999	19.8245	18.5245	12.0247	19.1745
131	14.0833	15.8166	20.1495	18.8495	12.3497	18.8495
132	14.0833	15.5999	20.1495	18.8495	12.0247	19.1745
133	14.3	15.5999	19.8245	18.8495	12.3497	19.4995
134	14.0833	15.5999	19.8245	18.8495	12.0247	19.1745
135	14.5166	15.8166	19.8245	18.8495	11.6997	19.1745
136	13.8666	15.8166	20.1495	18.8495	12.0247	19.1745
137	14.0833	15.5999	19.8245	18.8495	12.0247	19.1745
138	14.0833	15.5999	19.4995	18.8495	11.6997	19.1745
139	14.0833	15.5999	19.8245	18.5245	11.6997	19.1745
140	14.0833	15.5999	19.8245	18.8495	12.0247	19.4995
141	14.0833	15.5999	20.1495	18.8495	11.6997	19.1745
142	13.8666	15.5999	20.1495	18.8495	12.0247	19.1745
143	14.0833	15.5999	19.8245	18.8495	11.6997	19.1745
144	14.0833	15.5999	19.8245	18.5245	12.0247	19.1745
145	14.0833	15.5999	19.8245	18.8495	12.0247	19.4995
146	14.0833	15.5999	20.1495	18.8495	12.0247	18.8495
147	13.8666	15.8166	20.1495	18.5245	12.0247	18.8495
148	14.0833	15.8166	19.4995	18.5245	12.0247	19.1745
149	14.0833	15.5999	20.1495	18.5245	12.0247	19.1745
150	14.0833	15.5999	20.1495	18.8495	12.0247	19.4995
151	14.0833	15.3833	19.8245	18.8495	12.0247	19.4995
152	14.0833	15.8166	19.8245	18.8495	12.0247	18.8495
153	14.0833	15.5999	19.4995	18.8495	12.3497	19.1745
154	14.0833	15.8166	20.4745	18.8495	12.0247	19.4995
155	14.0833	15.5999	20.1495	18.8495	12.0247	19.4995
156	13.8666	15.5999	19.8245	18.8495	12.0247	19.4995
157	14.0833	15.5999	19.4995	18.5245	11.6997	19.1745
158	14.0833	15.8166	19.8245	18.8495	12.0247	18.8495
159	14.0833	15.5999	20.1495	18.8495	12.0247	19.1745
160	13.8666	15.8166	19.8245	18.5245	12.0247	19.1745
161	13.65	15.5999	19.8245	18.8495	12.0247	19.4995
162	14.0833	15.5999	20.1495	18.8495	12.0247	19.1745
163	14.0833	15.5999	19.8245	18.5245	12.0247	19.1745
164	14.0833	15.5999	19.8245	18.5245	12.0247	19.4995
165	14.0833	15.5999	19.8245	18.5245	12.3497	19.1745
166	13.8666	15.5999	20.1495	18.5245	12.0247	19.1745
167	14.0833	15.5999	20.1495	18.8495	12.0247	19.1745
168	13.8666	15.8166	19.8245	18.5245	12.0247	19.4995
169	14.0833	15.8166	20.1495	18.8495	12.0247	19.4995
170	14.0833	15.5999	20.1495	18.8495	12.3497	19.1745
171	14.0833	15.8166	20.1495	18.8495	12.0247	19.1745
172	14.0833	15.8166	20.1495	18.8495	12.0247	19.4995
173	14.0833	15.5999	19.8245	18.8495	11.6997	19.1745
174	13.8666	15.8166	19.8245	18.5245	12.3497	19.4995
175	14.0833	15.8166	19.8245	18.5245	12.3497	19.4995
176	14.0833	15.5999	19.4995	18.8495	12.0247	19.1745
177	14.0833	15.5999	19.8245	18.8495	12.0247	19.4995
178	14.0833	15.5999	19.8245	18.1995	12.0247	19.4995
179	14.0833	15.5999	19.8245	18.5245	12.0247	19.1745
180	14.0833	15.8166	19.4995	18.8495	12.3497	19.4995
181	14.0833	15.5999	19.8245	18.8495	12.3497	19.1745
182	14.0833	15.5999	20.1495	18.5245	12.0247	19.1745
183	14.3	15.5999	19.8245	18.8495	12.0247	19.4995
184	14.0833	15.5999	19.1745	18.8495	12.0247	19.4995
185	14.0833	15.5999	19.1745	18.5245	12.0247	19.1745
186	14.3	15.5999	19.8245	18.8495	12.0247	19.4995
187	14.3	15.8166	19.4995	18.8495	12.3497	19.1745
188	14.0833	15.5999	19.4995	18.8495	12.3497	19.1745
189	13.8666	15.5999	19.1745	18.8495	12.0247	19.1745
190	14.3	15.5999	19.8245	18.8495	11.3747	19.4995
191	14.0833	15.5999	19.8245	18.5245	12.0247	19.4995
192	14.3	15.5999	19.8245	18.8495	12.0247	19.1745
193	14.3	15.5999	20.1495	18.8495	11.6997	19.1745
194	14.3	15.5999	19.8245	18.8495	12.3497	19.4995
195	14.3	15.5999	19.8245	18.8495	11.6997	19.1745
196	14.0833	15.5999	20.1495	18.8495	12.0247	19.4995
197	14.0833	15.5999	20.1495	18.8495	12.0247	19.4995
198	14.3	15.5999	20.1495	18.8495	12.0247	19.1745
199	14.3	15.5999	19.4995	18.8495	12.0247	19.1745
200	14.3	15.5999	19.8245	18.8495	12.0247	19.1745
201	14.3	15.5999	19.8245	18.8495	12.3497	19.4995
202	14.3	15.5999	20.1495	18.8495	12.0247	19.4995
203	14.3	15.5999	19.8245	18.8495	12.0247	19.1745
204	14.0833	15.5999	19.8245	18.8495	12.0247	19.4995
205	14.3	15.5999	20.1495	18.5245	12.0247	19.1745
206	14.3	15.8166	20.1495	18.1995	12.0247	19.1745
207	14.0833	15.5999	20.1495	18.8495	12.0247	19.1745
208	14.3	15.5999	19.4995	18.5245	12.0247	19.1745
209	14.5166	15.8166	19.4995	18.5245	11.6997	19.4995
210	14.3	15.5999	19.4995	18.5245	11.6997	19.1745
211	14.0833	15.5999	19.4995	18.5245	12.3497	19.1745
212	14.3	15.5999	19.4995	18.8495	12.0247	19.1745
213	14.3	15.5999	19.8245	18.8495	12.0247	19.1745
214	14.3	15.5999	19.8245	18.5245	12.3497	19.4995
215	14.3	15.5999	19.8245	18.5245	12.6747	19.4995
216	14.0833	15.5999	19.8245	18.8495	12.3497	19.1745
217	14.3	15.5999	19.4995	18.8495	12.3497	19.1745
218	14.0833	15.5999	19.1745	18.5245	12.6747	19.1745
219	14.3	15.5999	19.8245	18.8495	12.0247	19.1745
220	14.3	15.3833	19.4995	18.8495	12.6747	19.1745
221	14.3	15.5999	19.8245	18.5245	12.6747	19.8245
222	14.3	15.5999	20.1495	18.5245	12.3497	19.4995
223	14.3	15.5999	19.8245	18.8495	12.3497	19.1745
224	14.0833	15.8166	19.1745	18.5245	12.3497	19.4995
225	14.3	15.5999	19.4995	18.1995	12.6747	19.4995
226	14.3	15.5999	19.4995	18.8495	12.3497	19.4995
227	14.3	15.5999	19.4995	18.5245	12.0247	19.4995
228	14.0833	15.5999	19.8245	18.5245	12.6747	19.4995
229	14.3	15.5999	20.1495	18.8495	12.3497	19.1745
230	14.3	15.5999	19.8245	18.5245	12.3497	19.4995
231	14.0833	15.5999	19.8245	18.5245	12.0247	19.1745
232	14.3	15.5999	20.1495	18.8495	12.0247	19.4995
233	14.3	15.5999	19.8245	18.8495	12.3497	19.1745
234	14.3	15.5999	19.4995	18.5245	12.3497	19.4995
235	14.3	15.5999	20.1495	18.1995	12.3497	19.4995
236	14.5166	15.5999	20.1495	18.5245	12.0247	19.4995
237	14.0833	15.3833	20.4745	18.5245	12.3497	19.4995
238	14.3	15.5999	19.8245	18.5245	12.3497	19.1745
239	14.3	15.5999	19.4995	18.5245	12.3497	19.4995
240	14.3	15.8166	19.8245	18.8495	12.3497	19.1745
241	14.3	15.3833	19.8245	18.8495	12.3497	19.4995
242	14.3	15.5999	20.1495	18.8495	12.3497	19.4995
243	14.0833	15.3833	19.8245	18.5245	12.0247	19.4995
244	14.3	15.5999	19.4995	18.5245	12.3497	19.1745
245	14.3	15.5999	19.8245	18.5245	12.3497	19.1745
246	14.3	15.5999	20.1495	18.5245	12.3497	19.1745
247	14.5166	15.5999	19.8245	18.5245	11.6997	19.1745
248	14.3	15.5999	19.8245	18.8495	12.3497	19.4995
249	14.3	15.5999	20.1495	18.5245	12.0247	19.1745
250	14.3	15.3833	19.8245	18.5245	12.3497	19.4995
251	14.5166	15.5999	20.1495	18.5245	12.3497	19.1745
252	14.3	15.5999	19.8245	18.5245	12.0247	19.1745
253	14.3	15.5999	19.8245	18.5245	11.6997	19.1745
254	14.3	15.3833	19.8245	18.8495	12.0247	19.1745
255	14.0833	15.3833	19.4995	18.1995	12.0247	19.1745
256	14.3	15.3833	19.8245	18.8495	12.0247	19.1745
257	14.3	15.5999	19.8245	18.5245	12.3497	19.4995
258	14.3	15.3833	20.4745	18.8495	12.3497	19.1745
259	14.3	15.8166	19.8245	18.5245	12.3497	19.1745
260	14.3	15.5999	20.1495	18.8495	12.0247	19.1745
261	14.3	15.5999	19.8245	18.8495	12.3497	19.1745
262	14.3	15.3833	19.8245	18.8495	12.3497	19.1745
263	14.3	15.5999	19.8245	18.5245	12.3497	19.1745
264	14.3	15.3833	20.4745	18.5245	12.3497	19.1745
265	14.3	15.5999	19.4995	19.1745	12.3497	19.1745
266	14.3	15.5999	19.1745	18.5245	12.3497	19.1745
267	14.0833	15.5999	19.8245	18.1995	12.0247	19.1745
268	14.3	15.5999	19.8245	18.5245	12.3497	19.1745
269	14.3	15.3833	20.1495	18.5245	11.6997	19.1745
270	14.3	15.5999	20.1495	18.1995	12.0247	19.1745
271	14.3	15.5999	20.1495	18.8495	12.3497	18.8495
272	14.3	15.3833	19.8245	18.8495	12.3497	19.1745
273	14.3	15.5999	20.1495	18.5245	12.3497	19.1745
274	14.0833	15.3833	19.8245	18.8495	12.3497	19.1745
275	14.3	15.1666	19.4995	18.8495	12.3497	19.1745
276	14.3	15.3833	20.1495	18.5245	12.3497	18.8495
277	14.3	15.5999	19.8245	18.1995	12.3497	19.1745
278	14.3	15.3833	20.4745	18.8495	12.3497	19.1745
279	14.3	15.3833	19.4995	18.8495	12.3497	19.1745
280	14.3	15.5999	20.1495	18.5245	12.0247	19.1745
281	14.0833	15.3833	19.8245	18.8495	12.3497	19.1745
282	14.0833	15.3833	19.8245	18.5245	12.3497	19.1745
283	14.3	15.3833	20.1495	18.5245	12.0247	19.1745
284	14.3	15.3833	20.1495	18.5245	12.3497	18.8495
285	14.0833	15.3833	19.8245	18.5245	12.3497	18.8495
286	14.3	15.3833	19.4995	18.1995	12.3497	19.1745
287	14.3	15.5999	19.8245	18.5245	12.6747	18.8495
288	14.3	15.5999	19.8245	18.8495	12.0247	19.1745
289	14.3	15.5999	19.8245	18.8495	12.3497	19.1745
290	14.3	15.3833	19.8245	18.5245	12.6747	19.1745
291	14.3	15.5999	19.8245	18.8495	12.3497	18.8495
292	14.5166	15.3833	19.8245	18.8495	12.3497	19.1745
293	14.3	15.3833	19.8245	18.5245	12.3497	18.8495
294	14.3	15.3833	19.8245	18.8495	12.6747	19.1745
295	14.5166	15.5999	19.8245	18.5245	12.3497	18.8495
296	14.3	15.3833	20.1495	18.5245	12.3497	19.1745
297	14.3	15.3833	19.8245	18.8495	12.3497	18.8495
298	14.3	15.5999	20.1495	19.1745	12.6747	19.1745
299	14.3	15.5999	20.1495	18.5245	12.3497	19.1745
300	14.3	15.5999	19.4995	18.5245	12.3497	19.1745
301	14.0833	15.5999	20.1495	18.8495	12.3497	19.1745
302	14.3	15.5999	19.8245	18.5245	12.6747	19.1745
303	14.0833	15.5999	19.4995	18.5245	12.3497	19.1745
304	14.3	15.5999	19.8245	18.5245	12.0247	19.1745
305	14.3	15.3833	19.8245	18.5245	12.3497	19.1745
306	14.5166	15.3833	20.1495	18.5245	12.6747	19.1745
307	14.5166	15.3833	19.8245	18.8495	12.6747	19.1745
308	14.3	15.5999	20.4745	18.5245	12.3497	19.1745
309	14.3	15.5999	19.8245	18.5245	12.3497	19.1745
310	14.3	15.5999	19.8245	18.5245	12.6747	19.1745
311	14.3	15.5999	19.8245	18.5245	12.6747	19.1745
312	14.3	15.3833	19.8245	18.5245	12.3497	19.4995
313	14.0833	15.5999	20.1495	18.5245	12.3497	19.1745
314	14.3	15.5999	19.4995	18.5245	12.3497	18.8495
315	14.3	15.5999	20.1495	18.8495	12.0247	19.1745
316	14.3	15.3833	20.1495	18.8495	12.3497	18.8495
317	14.5166	15.5999	19.4995	18.8495	12.6747	19.1745
318	14.3	15.5999	19.4995	18.5245	12.6747	19.1745
319	14.3	15.5999	19.4995	18.5245	12.6747	19.1745
320	14.5166	15.3833	19.8245	18.5245	12.3497	19.4995
321	14.3	15.5999	19.4995	18.5245	12.3497	19.4995
322	14.3	15.5999	19.8245	18.5245	12.3497	18.8495
323	14.5166	15.5999	20.1495	18.5245	12.3497	19.1745
324	14.5166	15.5999	19.4995	18.8495	12.3497	19.1745
325	14.5166	15.3833	20.1495	18.5245	12.3497	19.1745
326	14.3	15.5999	19.4995	18.5245	12.3497	19.1745
327	14.3	15.5999	19.8245	18.5245	12.3497	19.4995
328	14.3	15.5999	19.8245	18.5245	12.3497	19.4995
329	14.3	15.5999	19.8245	18.5245	12.6747	19.4995
330	14.3	15.5999	20.1495	18.5245	12.3497	19.1745
331	14.3	15.5999	19.8245	18.5245	12.0247	19.1745
332	14.5166	15.5999	19.4995	18.5245	12.0247	19.1745
333	14.5166	15.5999	19.1745	18.5245	12.3497	19.4995
334	14.3	15.3833	19.8245	18.5245	12.3497	19.4995
335	14.3	15.5999	19.1745	18.5245	12.3497	19.1745
336	14.3	15.3833	19.4995	18.5245	12.3497	19.1745
337	14.5166	15.5999	19.4995	18.5245	12.3497	19.4995
338	14.5166	15.5999	20.1495	18.5245	12.3497	19.1745
339	14.3	15.5999	19.4995	18.5245	12.0247	19.4995
340	14.3	15.3833	19.4995	18.5245	12.3497	19.4995
341	14.3	15.3833	19.8245	18.5245	12.3497	19.1745
342	14.3	15.5999	19.8245	18.5245	12.3497	19.1745
343	14.3	15.3833	19.8245	18.5245	12.3497	19.1745
344	14.3	15.5999	19.4995	18.5245	12.3497	19.1745
345	14.5166	15.1666	19.8245	18.5245	12.0247	19.8245
346	14.3	15.5999	19.8245	18.5245	12.3497	19.1745
347	14.5166	15.5999	19.4995	18.5245	12.3497	19.4995
348	14.5166	15.3833	20.1495	18.5245	12.3497	19.1745
349	14.7333	15.5999	19.8245	18.5245	12.3497	19.1745
350	14.7333	15.3833	20.1495	18.1995	12.0247	19.4995
351	14.3	15.3833	19.8245	18.5245	12.0247	19.1745
352	14.5166	15.3833	19.8245	18.5245	11.6997	19.4995
353	14.5166	15.5999	20.1495	18.5245	12.3497	19.4995
354	14.3	15.5999	19.8245	18.5245	12.3497	19.1745
355	14.5166	15.3833	20.1495	18.5245	12.3497	19.4995
356	14.3	15.3833	19.8245	18.5245	12.3497	19.4995
357	14.5166	15.5999	20.1495	18.5245	12.3497	19.4995
358	14.3	15.5999	20.1495	18.5245	12.3497	19.4995
359	14.3	15.5999	20.4745	18.5245	12.3497	19.1745
360	14.3	15.3833	20.1495	18.5245	12.3497	19.4995
361	14.3	15.3833	19.8245	18.5245	12.0247	19.1745
362	14.3	15.5999	19.8245	18.8495	12.3497	19.4995
363	14.3	15.3833	19.8245	18.5245	12.0247	19.4995
364	14.3	15.5999	19.8245	18.5245	12.3497	19.1745
365	14.5166	15.5999	19.8245	18.5245	12.3497	19.4995
366	14.3	15.3833	20.1495	18.5245	12.3497	19.1745
367	14.5166	15.3833	19.8245	18.5245	12.3497	19.4995
368	14.3	15.3833	20.4745	18.1995	12.3497	19.4995
369	14.3	15.5999	19.4995	18.1995	12.3497	19.4995
370	14.3	15.5999	20.1495	18.5245	12.3497	19.4995
371	14.3	15.5999	19.8245	18.8495	12.3497	19.4995
372	14.3	15.5999	19.1745	18.8495	12.3497	19.4995
373	14.5166	15.5999	20.1495	18.5245	12.3497	19.4995
374	14.3	15.3833	19.8245	18.5245	12.0247	19.4995
375	14.3	15.5999	19.4995	18.1995	12.3497	19.4995
376	14.5166	15.3833	19.1745	18.1995	12.3497	19.4995
377	14.3	15.5999	19.1745	18.1995	12.3497	19.4995
378	14.5166	15.5999	19.8245	18.5245	12.3497	19.1745
379	14.3	15.1666	19.4995	18.5245	12.3497	19.4995
380	14.3	15.3833	20.1495	18.1995	12.3497	19.1745
381	14.5166	15.5999	19.8245	18.1995	12.0247	19.4995
382	14.5166	15.3833	19.4995	18.5245	12.3497	19.4995
383	14.7333	15.5999	19.8245	18.1995	12.3497	19.4995
384	14.7333	15.3833	19.8245	18.1995	12.3497	19.4995
385	14.5166	15.3833	19.1745	18.1995	12.0247	19.4995
386	14.5166	15.3833	19.1745	18.1995	12.0247	19.4995
387	14.3	15.3833	19.1745	18.1995	12.3497	19.4995
388	14.3	15.3833	19.4995	18.1995	12.3497	19.4995
389	14.3	15.5999	19.1745	18.1995	12.6747	19.4995
390	14.7333	15.5999	19.4995	18.1995	12.3497	19.4995
391	14.5166	15.3833	19.1745	18.5245	12.3497	19.4995
392	14.5166	15.5999	19.4995	18.1995	12.3497	19.4995
393	14.3	15.3833	19.8245	18.1995	12.3497	19.8245
394	14.5166	15.5999	19.1745	18.1995	12.3497	19.4995
395	14.5166	15.5999	19.4995	18.1995	12.3497	19.4995
396	14.7333	15.3833	19.4995	18.5245	12.3497	19.4995
397	14.5166	15.5999	19.8245	18.1995	12.3497	19.4995
398	14.7333	15.3833	19.1745	18.1995	12.3497	19.4995
399	14.5166	15.5999	19.4995	18.5245	12.3497	19.4995
400	14.3	15.5999	20.1495	18.1995	12.3497	19.8245
401	14.3	15.5999	19.4995	18.1995	12.3497	19.4995
402	14.3	15.5999	19.8245	18.5245	12.3497	19.4995
403	14.3	15.5999	19.4995	18.1995	12.3497	19.4995
404	14.5166	15.3833	19.4995	18.5245	12.3497	19.4995
405	14.3	15.5999	19.4995	18.5245	12.3497	19.8245
406	14.5166	15.5999	19.4995	18.1995	12.3497	19.4995
407	14.3	15.5999	19.4995	18.1995	12.3497	19.4995
408	14.3	15.5999	19.8245	18.1995	12.3497	19.4995
409	14.3	15.5999	19.8245	18.5245	12.3497	19.4995
410	14.5166	15.3833	19.8245	18.5245	12.3497	19.8245
411	14.5166	15.3833	19.4995	18.1995	12.6747	19.4995
412	14.5166	15.5999	19.8245	18.1995	12.6747	19.4995
413	14.3	15.3833	19.4995	18.1995	12.9997	20.1495
414	14.5166	15.3833	19.8245	18.5245	12.3497	19.4995
415	14.3	15.5999	19.1745	18.1995	12.6747	19.4995
416	14.7333	15.1666	19.8245	18.5245	12.9997	19.4995
417	14.5166	15.3833	19.4995	18.1995	12.3497	19.8245
418	14.3	15.5999	20.1495	18.5245	12.3497	19.4995
419	14.5166	15.3833	19.4995	18.5245	12.3497	19.4995
420	14.5166	15.3833	19.4995	18.1995	12.3497	19.4995
421	14.5166	15.5999	19.4995	18.1995	12.3497	19.4995
422	14.5166	15.3833	19.1745	18.5245	12.3497	19.4995
423	14.3	15.3833	20.1495	18.1995	12.3497	19.4995
424	14.3	15.5999	19.8245	18.1995	12.3497	19.4995
425	14.5166	15.3833	19.8245	18.1995	12.3497	19.4995
426	14.5166	15.3833	19.4995	18.1995	12.3497	19.4995
427	14.5166	15.5999	19.4995	18.1995	12.6747	19.4995
428	14.3	15.3833	20.1495	18.5245	12.0247	19.4995
429	14.5166	15.3833	20.1495	18.5245	12.3497	19.8245
430	14.5166	15.5999	19.4995	18.5245	12.3497	19.4995
431	14.7333	15.3833	20.1495	18.1995	12.3497	19.8245
432	14.3	15.3833	19.8245	18.5245	12.3497	19.4995
433	14.5166	15.3833	19.4995	18.1995	12.3497	19.4995
434	14.3	15.3833	19.4995	18.5245	12.3497	19.8245
435	14.5166	15.5999	20.1495	18.5245	12.6747	19.4995
436	14.3	15.5999	19.8245	18.1995	12.3497	19.4995
437	14.3	15.1666	19.8245	18.1995	12.6747	19.4995
438	14.3	15.5999	19.8245	18.1995	12.3497	19.4995
439	14.5166	15.5999	20.1495	18.5245	12.3497	19.4995
440	14.3	15.3833	19.8245	18.1995	12.3497	19.4995
441	14.3	15.5999	19.8245	18.1995	12.9997	19.8245
442	14.3	15.5999	19.4995	18.1995	12.9997	19.8245
443	14.5166	15.3833	19.8245	18.1995	12.3497	19.4995
444	14.3	15.5999	19.8245	18.1995	12.6747	19.4995
445	14.5166	15.3833	19.8245	18.1995	12.6747	19.4995
446	14.3	15.3833	19.8245	18.1995	12.6747	19.8245
447	14.5166	15.5999	20.1495	18.1995	12.3497	20.1495
448	14.3	15.5999	19.4995	18.1995	12.3497	19.4995
449	14.3	15.5999	19.8245	18.1995	12.6747	19.8245
450	14.3	15.3833	19.8245	18.1995	12.6747	19.4995
451	14.5166	15.5999	19.4995	18.5245	12.6747	20.1495
452	14.5166	15.5999	19.8245	18.5245	12.3497	19.8245
453	14.5166	15.5999	20.1495	18.1995	12.3497	19.4995
454	14.3	15.5999	19.8245	18.1995	12.3497	19.4995
455	14.7333	15.5999	20.1495	18.5245	12.6747	19.8245
456	14.3	15.5999	19.4995	18.1995	12.3497	19.8245
457	14.5166	15.8166	19.8245	18.1995	12.3497	19.8245
458	14.5166	15.5999	20.1495	18.1995	12.3497	19.4995
459	14.7333	15.5999	20.1495	18.5245	12.3497	19.8245
460	14.5166	15.5999	19.8245	18.1995	12.6747	19.4995
461	14.5166	15.8166	19.4995	18.1995	12.3497	19.8245
462	14.3	15.5999	19.8245	18.1995	12.3497	19.4995
463	14.7333	15.5999	19.4995	18.5245	12.6747	19.8245
464	14.3	15.5999	20.1495	18.1995	12.6747	19.4995
465	14.5166	15.5999	19.4995	18.8495	12.3497	19.4995
466	14.5166	15.3833	19.8245	18.1995	12.3497	19.4995
467	14.5166	15.5999	20.1495	18.1995	12.3497	19.4995
468	14.7333	15.3833	19.4995	18.5245	12.9997	19.8245
469	14.7333	15.8166	19.8245	18.1995	12.3497	19.4995
470	14.3	15.5999	19.8245	18.5245	12.3497	19.4995
471	14.5166	15.5999	19.8245	18.1995	12.6747	19.4995
472	14.5166	15.5999	19.4995	18.1995	12.3497	19.4995
473	14.5166	15.5999	19.4995	18.1995	12.3497	19.4995
474	14.7333	15.8166	19.8245	18.1995	12.3497	19.4995
475	14.3	15.5999	19.8245	18.5245	12.3497	19.4995
476	14.5166	15.3833	19.8245	18.1995	12.3497	19.4995
477	14.3	15.3833	20.1495	18.8495	12.3497	19.8245
478	14.5166	15.3833	19.8245	18.1995	12.3497	19.4995
479	14.5166	15.3833	19.4995	18.5245	12.3497	19.4995
480	14.5166	15.5999	19.8245	18.5245	12.3497	19.8245
481	14.7333	15.5999	19.8245	18.1995	12.3497	20.1495
482	14.5166	15.3833	19.4995	18.1995	12.3497	19.8245
483	14.3	15.3833	19.1745	18.1995	12.3497	19.4995
484	14.3	15.5999	19.4995	18.5245	12.3497	19.4995
485	14.5166	15.3833	19.8245	18.5245	12.3497	19.4995
486	14.5166	15.5999	19.8245	18.5245	12.3497	19.8245
487	14.5166	15.8166	20.4745	18.5245	12.3497	19.8245
488	14.5166	15.5999	19.8245	18.1995	12.3497	19.4995
489	14.5166	15.5999	19.8245	18.5245	12.3497	19.4995
490	14.5166	15.8166	20.1495	18.1995	12.3497	19.4995
491	14.5166	15.5999	20.4745	18.1995	12.6747	19.4995
492	14.5166	15.5999	19.8245	18.5245	12.6747	19.4995
493	14.7333	15.3833	19.4995	18.1995	12.3497	19.4995
494	14.3	15.5999	19.4995	18.1995	12.3497	19.4995
495	14.5166	15.3833	19.8245	18.5245	12.3497	19.4995
496	14.5166	15.8166	20.1495	18.5245	12.3497	19.4995
497	14.5166	15.3833	19.8245	18.5245	12.6747	19.4995
498	14.5166	15.3833	19.8245	18.8495	12.3497	19.4995
499	14.5166	15.3833	19.8245	18.1995	12.3497	19.8245
500	14.5166	15.5999	19.8245	18.1995	12.6747	19.4995
501	14.5166	15.5999	19.8245	18.1995	12.3497	19.4995
502	14.5166	15.5999	19.8245	18.5245	12.9997	19.4995
503	14.5166	15.8166	19.8245	18.1995	12.3497	19.4995
504	14.5166	15.5999	19.8245	17.8746	12.3497	19.4995
505	14.5166	15.5999	19.8245	18.5245	12.3497	19.4995
506	14.5166	15.5999	20.1495	18.1995	12.3497	19.4995
507	14.7333	15.5999	20.1495	18.1995	12.3497	19.8245
508	14.5166	15.5999	20.1495	18.1995	12.9997	19.1745
509	14.5166	15.5999	19.1745	18.5245	12.3497	19.4995
510	14.5166	15.5999	19.4995	18.5245	12.6747	19.4995
511	14.5166	15.5999	19.4995	18.1995	12.6747	19.4995
512	14.7333	15.8166	19.8245	18.1995	12.3497	19.4995
513	14.5166	15.5999	19.4995	18.1995	12.3497	19.8245
514	14.5166	15.5999	20.1495	18.1995	12.3497	19.4995
515	14.5166	15.8166	19.4995	18.1995	12.6747	19.4995
516	14.5166	15.5999	19.4995	18.1995	12.3497	19.4995
517	14.5166	15.8166	20.1495	18.5245	12.3497	19.4995
518	14.5166	15.8166	19.4995	18.5245	12.3497	19.4995
519	14.7333	15.5999	19.8245	18.1995	12.3497	19.4995
520	14.7333	15.5999	19.8245	18.1995	12.9997	19.4995
521	14.5166	16.0333	19.8245	18.1995	12.3497	19.4995
522	14.7333	15.5999	19.4995	17.8746	12.3497	19.8245
523	14.7333	16.0333	19.8245	18.5245	12.3497	19.4995
524	14.5166	15.5999	20.4745	18.1995	12.6747	19.4995
525	14.7333	15.5999	19.8245	18.1995	12.3497	19.4995
526	14.7333	15.5999	19.8245	18.8495	12.3497	19.4995
527	14.5166	15.5999	19.4995	18.5245	12.3497	19.4995
528	14.7333	15.5999	19.4995	18.5245	12.6747	19.4995
529	14.7333	15.8166	19.8245	18.1995	12.3497	19.4995
530	14.5166	15.3833	19.8245	18.5245	12.6747	19.4995
531	14.5166	15.5999	20.1495	18.1995	12.3497	19.4995
532	14.3	15.3833	19.8245	18.1995	12.6747	19.4995
533	14.3	15.3833	19.4995	18.1995	12.6747	19.4995
534	14.7333	15.5999	19.4995	18.5245	12.3497	19.4995
535	14.7333	15.3833	19.8245	18.5245	12.6747	19.4995
536	14.5166	15.5999	20.1495	18.1995	12.3497	19.8245
537	14.5166	15.5999	20.1495	18.5245	12.3497	19.4995
538	14.5166	15.5999	19.8245	18.8495	12.3497	19.4995
539	14.5166	15.3833	19.8245	18.1995	12.3497	19.4995
540	14.5166	15.3833	19.8245	18.1995	12.3497	19.4995
541	14.5166	15.5999	20.4745	18.1995	12.0247	19.4995
542	14.7333	15.5999	19.8245	18.5245	12.6747	19.4995
543	14.7333	15.5999	20.1495	18.1995	12.3497	19.4995
544	14.7333	15.5999	20.1495	18.1995	12.6747	19.8245
545	14.7333	15.8166	19.8245	18.1995	12.0247	19.4995
546	14.7333	15.8166	19.8245	18.1995	12.3497	19.4995
547	14.7333	15.5999	19.8245	18.1995	12.3497	19.4995
548	14.5166	15.5999	20.4745	18.1995	12.3497	19.8245
549	14.7333	15.5999	20.1495	18.5245	12.3497	19.8245
550	14.5166	15.5999	19.4995	18.1995	12.6747	19.8245
551	14.5166	15.5999	19.8245	18.5245	12.0247	19.4995
552	14.5166	15.5999	20.4745	18.5245	12.3497	19.4995
553	14.5166	15.8166	19.8245	18.1995	12.3497	19.4995
554	14.7333	15.5999	20.1495	18.5245	12.6747	19.4995
555	14.7333	15.5999	19.8245	18.1995	12.3497	19.4995
556	14.7333	15.5999	19.8245	18.1995	12.3497	19.4995
557	14.7333	15.5999	19.8245	18.5245	12.3497	19.8245
558	14.5166	15.8166	20.1495	18.1995	12.6747	19.4995
559	14.7333	15.8166	20.1495	18.1995	12.6747	19.4995
560	14.7333	16.0333	19.4995	18.1995	12.6747	19.4995
561	14.5166	15.8166	19.8245	18.1995	12.6747	19.4995
562	14.7333	15.8166	20.1495	18.1995	12.3497	19.8245
563	14.5166	16.0333	20.1495	18.5245	12.3497	19.4995
564	14.7333	15.8166	20.4745	18.1995	12.3497	19.4995
565	14.7333	15.8166	20.1495	18.1995	12.6747	19.4995
566	14.7333	15.8166	20.1495	18.1995	12.3497	19.4995
567	14.7333	15.8166	19.4995	18.1995	12.3497	19.4995
568	14.7333	15.8166	20.4745	18.1995	12.3497	19.4995
569	14.5166	15.5999	20.4745	18.5245	12.3497	19.4995
570	14.7333	15.8166	19.8245	18.1995	12.3497	19.8245
571	14.7333	15.8166	19.8245	18.1995	12.0247	19.4995
572	14.7333	15.8166	19.8245	18.1995	12.3497	19.4995
573	14.7333	15.8166	19.4995	17.8746	12.3497	19.8245
574	14.7333	15.3833	20.1495	18.1995	12.3497	19.8245
575	14.5166	15.5999	20.4745	18.1995	12.3497	19.8245
576	14.7333	15.8166	19.8245	18.1995	12.3497	19.4995
577	14.5166	15.5999	19.8245	18.1995	12.3497	19.8245
578	14.5166	15.8166	20.1495	18.5245	12.3497	19.4995
579	14.5166	15.5999	19.8245	17.8746	12.3497	19.4995
580	14.7333	15.3833	19.8245	18.1995	12.3497	19.4995
581	14.7333	15.5999	20.1495	18.5245	12.6747	19.8245
582	14.5166	15.5999	19.8245	18.1995	12.3497	19.4995
583	14.5166	15.8166	20.4745	18.5245	11.6997	19.8245
584	14.7333	15.5999	19.8245	18.1995	12.0247	19.8245
585	14.7333	15.5999	19.8245	18.1995	12.3497	19.4995
586	14.7333	15.3833	20.1495	18.1995	12.3497	19.8245
587	14.5166	15.5999	20.1495	18.1995	12.3497	19.4995
588	14.7333	15.3833	19.8245	18.5245	12.3497	19.4995
589	14.5166	15.1666	20.1495	18.1995	12.3497	19.8245
590	14.7333	15.5999	20.1495	18.1995	12.3497	19.8245
591	14.5166	15.5999	20.1495	18.1995	12.3497	19.8245
592	14.7333	15.5999	19.8245	18.1995	12.3497	19.8245
593	14.5166	15.5999	20.1495	18.5245	12.3497	19.4995
594	14.7333	15.8166	20.4745	18.1995	12.3497	19.4995
595	14.7333	15.3833	20.1495	17.8746	12.3497	19.4995
596	14.7333	15.5999	19.8245	18.5245	12.0247	19.8245
597	14.7333	15.1666	20.4745	17.8746	12.3497	19.8245
598	14.7333	15.3833	20.1495	18.5245	12.3497	19.8245
599	14.7333	15.3833	20.1495	18.1995	12.6747	19.8245
600	14.7333	15.3833	20.1495	17.8746	12.3497	19.8245
601	14.5166	15.3833	20.4745	18.1995	12.3497	19.8245
602	14.7333	15.8166	20.1495	18.5245	12.3497	19.8245
603	14.7333	15.8166	20.1495	18.1995	12.3497	19.8245
604	14.7333	15.8166	20.1495	18.1995	12.9997	19.8245
605	14.7333	16.0333	19.8245	18.1995	12.3497	19.8245
606	14.7333	15.5999	20.1495	18.1995	12.6747	20.1495
607	14.7333	15.8166	20.1495	18.1995	12.3497	19.8245
608	14.7333	15.8166	20.1495	18.1995	12.0247	19.4995
609	14.7333	15.5999	20.1495	17.8746	12.3497	19.8245
610	14.7333	15.8166	19.8245	17.8746	12.3497	19.8245
611	14.7333	15.8166	20.1495	18.1995	12.6747	19.8245
612	14.5166	15.3833	19.8245	17.8746	12.3497	19.4995
613	14.7333	15.5999	20.1495	18.5245	12.0247	19.8245
614	14.5166	15.8166	20.1495	18.1995	12.3497	19.8245
615	14.7333	15.8166	20.1495	18.5245	12.3497	19.8245
616	14.7333	15.8166	20.1495	18.5245	12.0247	19.8245
617	14.7333	15.8166	20.1495	18.1995	12.3497	20.1495
618	14.7333	15.8166	19.8245	17.8746	12.3497	20.1495
619	14.7333	15.5999	19.8245	18.1995	12.3497	20.1495
620	14.7333	15.8166	19.8245	18.1995	12.6747	19.8245
621	14.95	15.8166	20.1495	18.1995	12.3497	19.8245
622	14.7333	15.3833	20.4745	18.1995	12.3497	19.4995
623	14.7333	15.5999	20.1495	18.5245	12.0247	19.8245
624	14.7333	15.3833	19.8245	18.1995	12.3497	19.8245
625	14.7333	15.5999	19.8245	18.1995	12.3497	19.8245
626	14.7333	15.3833	20.1495	18.1995	12.6747	20.1495
627	14.5166	15.1666	20.1495	18.1995	12.3497	19.8245
628	14.7333	15.5999	20.1495	18.5245	12.3497	19.8245
629	14.5166	15.5999	19.8245	17.8746	12.3497	20.1495
630	14.5166	15.3833	19.8245	18.1995	12.0247	19.8245
631	14.95	15.5999	20.1495	17.8746	12.6747	19.8245
632	14.7333	15.5999	19.4995	18.5245	12.3497	19.8245
633	14.7333	15.5999	19.4995	18.1995	12.6747	19.8245
634	14.7333	15.5999	19.8245	18.1995	12.6747	19.4995
635	14.7333	15.5999	20.1495	17.8746	12.6747	19.8245
636	14.7333	15.5999	19.8245	18.1995	12.6747	19.8245
637	14.5166	15.5999	20.1495	18.1995	12.3497	19.8245
638	14.5166	15.5999	20.1495	17.8746	12.3497	19.8245
639	14.7333	15.3833	19.8245	18.1995	12.6747	19.8245
640	14.5166	15.5999	19.8245	18.5245	12.3497	19.8245
641	14.5166	15.5999	20.1495	18.1995	12.6747	20.1495
642	14.7333	15.5999	19.8245	18.1995	12.6747	19.8245
643	14.7333	15.5999	19.8245	18.1995	12.6747	19.8245
644	14.7333	15.5999	19.8245	18.5245	12.6747	20.1495
645	14.5166	15.5999	19.8245	18.1995	12.6747	19.8245
646	14.7333	15.5999	19.8245	18.1995	12.3497	19.8245
647	14.7333	15.3833	19.8245	17.8746	12.6747	20.1495
648	14.7333	15.5999	19.4995	17.8746	12.6747	20.1495
649	14.7333	15.5999	20.4745	18.1995	12.6747	19.8245
650	14.7333	15.5999	20.1495	18.1995	12.6747	19.8245
651	14.7333	15.5999	19.8245	18.1995	12.6747	19.8245
652	14.7333	15.3833	19.8245	18.1995	12.6747	20.1495
653	14.5166	15.5999	20.1495	18.5245	12.6747	19.8245
654	14.7333	15.5999	20.1495	18.1995	12.3497	20.1495
655	14.5166	15.5999	19.8245	18.1995	12.6747	20.1495
656	14.5166	15.5999	19.8245	18.1995	12.6747	19.8245
657	14.7333	15.5999	19.8245	18.5245	12.3497	20.1495
658	14.5166	15.5999	19.8245	18.5245	12.6747	19.8245
659	14.7333	15.5999	19.8245	18.5245	12.6747	20.1495
660	14.5166	15.8166	19.8245	18.5245	12.6747	20.1495
661	14.7333	15.5999	19.8245	18.1995	12.6747	20.1495
662	14.5166	15.5999	19.8245	18.1995	12.6747	19.8245
663	14.5166	15.8166	19.4995	18.1995	12.9997	20.1495
664	14.5166	15.5999	19.4995	18.1995	12.6747	19.8245
665	14.5166	15.8166	19.8245	18.5245	12.9997	20.1495
666	14.7333	15.5999	19.8245	18.5245	12.6747	20.1495
667	14.5166	15.5999	19.8245	18.1995	12.6747	20.1495
668	14.7333	15.5999	19.8245	18.1995	12.6747	19.8245
669	14.7333	15.5999	20.4745	18.1995	12.6747	20.1495
670	14.5166	15.5999	19.8245	18.5245	12.9997	20.1495
671	14.7333	15.8166	19.8245	17.8746	12.6747	20.1495
672	14.5166	15.5999	19.4995	18.5245	12.6747	20.1495
673	14.7333	16.0333	19.8245	18.5245	12.6747	20.1495
674	14.7333	15.5999	19.4995	18.5245	12.9997	20.1495
675	14.7333	15.8166	19.8245	18.1995	12.3497	20.1495
676	14.7333	15.8166	20.1495	18.1995	12.6747	20.1495
677	14.7333	15.8166	19.8245	18.5245	12.6747	20.1495
678	14.7333	15.5999	19.8245	18.1995	12.6747	20.1495
679	14.5166	15.5999	19.8245	18.1995	12.6747	20.1495
680	14.5166	15.5999	19.4995	18.1995	12.6747	20.1495
681	14.5166	15.5999	19.8245	18.1995	12.6747	20.1495
682	14.7333	15.5999	19.8245	18.5245	12.6747	20.1495
683	14.5166	15.5999	19.8245	18.1995	12.6747	20.1495
684	14.7333	15.5999	19.8245	17.8746	12.6747	19.8245
685	14.7333	15.5999	19.8245	17.8746	12.6747	19.8245
686	14.95	15.8166	19.8245	18.1995	12.6747	20.1495
687	14.95	15.5999	19.8245	18.5245	12.6747	20.1495
688	14.5166	15.5999	19.8245	18.1995	12.6747	20.1495
689	14.95	15.5999	19.8245	18.1995	12.6747	19.8245
690	14.7333	15.5999	19.8245	18.5245	12.6747	20.1495
691	14.7333	15.5999	19.8245	17.8746	12.9997	20.1495
692	14.5166	15.5999	19.8245	17.8746	12.6747	19.8245
693	14.95	15.5999	19.4995	18.1995	12.6747	19.8245
694	14.7333	15.5999	19.8245	18.1995	12.6747	20.1495
695	14.7333	15.3833	19.8245	17.8746	12.6747	20.1495
696	14.5166	15.5999	20.1495	18.1995	12.6747	20.1495
697	14.95	15.3833	19.8245	18.1995	12.9997	20.1495
698	14.95	15.5999	20.1495	18.1995	12.9997	20.1495
699	14.95	15.5999	19.8245	18.1995	12.9997	20.1495
700	14.7333	15.3833	20.1495	18.5245	12.9997	20.1495
701	14.7333	15.5999	19.8245	18.1995	12.9997	19.8245
702	14.7333	15.5999	19.8245	18.1995	12.9997	20.1495
703	14.5166	15.5999	19.8245	18.1995	12.6747	20.1495
704	14.95	15.5999	20.1495	18.1995	12.9997	19.8245
705	14.7333	15.5999	20.1495	17.8746	12.6747	20.1495
706	14.95	15.5999	19.4995	18.1995	12.9997	20.1495
707	14.95	15.8166	20.1495	18.1995	12.9997	20.1495
708	14.95	15.8166	20.1495	18.5245	12.3497	20.1495
709	14.7333	16.0333	19.4995	18.5245	12.9997	20.1495
710	14.95	15.5999	19.8245	18.1995	12.9997	20.1495
711	14.95	15.5999	19.8245	18.1995	12.9997	20.1495
712	14.95	15.5999	20.4745	18.1995	12.6747	19.8245
713	14.5166	15.5999	19.8245	18.8495	12.9997	20.1495
714	14.95	15.5999	19.4995	17.8746	13.3247	20.1495
715	14.7333	15.3833	19.4995	18.5245	13.3247	20.1495
716	14.5166	15.5999	20.1495	18.1995	12.9997	19.8245
717	14.5166	15.5999	19.8245	18.5245	12.9997	20.1495
718	14.95	15.3833	20.1495	18.1995	13.3247	20.1495
719	14.7333	15.3833	20.4745	18.1995	12.9997	20.1495
720	14.5166	15.5999	20.1495	18.5245	12.6747	20.1495
721	14.95	15.5999	20.1495	18.5245	12.9997	19.8245
722	14.95	15.5999	19.4995	18.1995	12.9997	19.8245
723	14.7333	15.5999	20.1495	18.5245	12.9997	19.8245
724	14.7333	15.3833	19.8245	17.8746	12.9997	19.8245
725	14.7333	15.5999	20.1495	18.1995	12.9997	19.8245
726	14.7333	15.3833	19.8245	17.8746	12.9997	19.8245
727	14.7333	15.5999	20.1495	18.1995	12.9997	19.8245
728	14.95	15.8166	19.8245	18.5245	12.6747	19.8245
729	14.7333	15.8166	19.8245	17.8746	12.6747	19.8245
730	14.7333	15.5999	19.8245	18.1995	12.9997	19.8245
731	14.7333	15.5999	19.8245	17.8746	12.9997	19.4995
732	14.7333	15.5999	20.1495	18.1995	12.9997	19.8245
733	14.7333	15.5999	19.4995	18.1995	13.3247	19.8245
734	14.95	15.8166	19.4995	18.1995	13.3247	19.8245
735	14.7333	15.8166	20.1495	17.8746	13.3247	19.4995
736	14.95	15.8166	20.1495	17.8746	13.3247	19.4995
737	14.95	15.5999	20.1495	18.1995	12.9997	19.4995
738	14.95	15.8166	20.1495	18.8495	12.9997	19.4995
739	14.7333	15.3833	19.4995	18.5245	12.9997	19.8245
740	14.7333	15.5999	20.4745	18.5245	13.3247	19.8245
741	14.7333	15.8166	19.8245	18.1995	13.6497	19.8245
742	14.95	15.5999	20.1495	18.1995	13.6497	19.4995
743	14.7333	15.3833	19.4995	18.1995	13.3247	19.4995
744	14.7333	15.8166	19.8245	17.8746	13.3247	19.4995
745	14.7333	15.5999	20.1495	18.1995	13.6497	19.8245
746	14.95	15.5999	19.8245	18.1995	13.3247	19.4995
747	14.95	15.5999	19.8245	17.8746	13.3247	19.4995
748	14.7333	15.8166	20.4745	18.1995	13.3247	19.8245
749	14.95	15.5999	20.1495	18.5245	13.6497	19.8245
750	14.95	15.5999	19.8245	18.1995	13.3247	19.8245
751	14.7333	15.5999	19.8245	18.1995	13.6497	19.8245
752	14.7333	15.5999	19.4995	17.8746	12.9997	19.8245
753	14.7333	15.5999	20.1495	18.8495	12.9997	19.8245
754	14.95	15.5999	19.8245	18.1995	12.9997	19.8245
755	14.95	15.5999	19.4995	18.5245	12.9997	19.8245
756	14.95	15.5999	20.1495	18.5245	13.3247	19.4995
757	14.95	15.3833	19.8245	18.5245	12.9997	19.8245
758	14.95	15.5999	19.8245	18.5245	13.6497	19.8245
759	14.7333	15.1666	19.8245	18.1995	13.3247	19.8245
760	14.95	15.5999	19.8245	18.1995	13.3247	19.4995
761	14.95	15.8166	20.1495	17.8746	12.9997	19.4995
762	14.7333	15.3833	19.8245	18.1995	13.3247	19.8245
763	14.7333	15.3833	20.1495	18.1995	13.3247	19.8245
764	14.95	15.3833	20.1495	18.8495	13.3247	19.4995
765	14.95	15.3833	19.8245	18.8495	13.3247	19.4995
766	14.95	15.3833	19.4995	17.8746	13.3247	19.4995
767	14.95	15.3833	19.4995	18.5245	13.3247	19.4995
768	14.95	15.3833	20.1495	18.1995	13.3247	19.4995
769	14.95	15.3833	19.8245	18.5245	13.3247	19.8245
770	14.95	15.3833	19.8245	18.5245	13.3247	19.4995
771	14.95	15.3833	20.1495	18.5245	13.3247	19.4995
772	14.95	15.5999	20.1495	18.1995	13.6497	19.4995
773	14.95	15.3833	20.1495	18.5245	13.3247	19.4995
774	14.7333	15.3833	19.8245	18.8495	12.9997	19.8245
775	14.95	15.3833	19.8245	18.8495	13.3247	19.4995
776	14.95	15.3833	20.1495	18.1995	12.9997	19.8245
777	14.95	14.95	19.8245	18.1995	13.6497	19.8245
778	14.95	15.3833	19.8245	18.1995	13.3247	19.8245
779	14.95	15.5999	19.8245	18.5245	13.3247	19.4995
780	14.95	15.1666	20.1495	18.1995	13.3247	19.4995
781	14.95	15.1666	19.8245	18.1995	12.9997	19.8245
782	14.7333	15.3833	20.1495	18.1995	13.6497	19.4995
783	14.7333	15.5999	20.4745	18.1995	13.6497	19.4995
784	14.95	15.1666	19.8245	18.1995	13.3247	19.4995
785	14.95	15.1666	20.1495	18.1995	13.3247	19.8245
786	14.95	14.95	19.8245	18.8495	13.3247	19.4995
787	14.95	15.1666	20.1495	18.5245	13.3247	19.4995
788	14.95	15.1666	19.8245	18.1995	12.9997	19.8245
789	14.7333	15.1666	19.8245	18.1995	13.3247	19.8245
790	14.95	15.1666	19.4995	18.1995	13.3247	19.4995
791	14.95	15.1666	19.8245	18.5245	13.3247	19.4995
792	14.95	15.1666	19.8245	18.1995	13.3247	19.4995
793	14.95	15.1666	20.1495	18.1995	13.6497	19.4995
794	14.95	15.1666	19.8245	18.8495	13.6497	19.4995
795	14.95	15.1666	19.4995	18.1995	13.3247	19.4995
796	14.95	15.1666	20.1495	18.1995	13.3247	19.4995
797	14.7333	15.1666	20.1495	18.1995	13.3247	19.4995
798	15.1666	15.1666	19.8245	18.1995	12.6747	19.8245
799	14.95	15.1666	20.1495	18.1995	13.3247	19.4995
800	14.95	15.1666	20.1495	17.8746	12.9997	19.8245
801	14.95	15.1666	20.1495	18.1995	13.3247	19.8245
802	14.95	15.1666	20.1495	18.1995	12.9997	19.8245
803	14.7333	15.1666	19.8245	18.1995	12.9997	19.4995
804	14.95	15.1666	20.1495	18.1995	12.6747	19.4995
805	14.95	15.1666	19.8245	18.5245	12.9997	19.4995
806	14.7333	15.1666	19.8245	18.1995	12.9997	19.4995
807	14.95	15.1666	20.4745	18.5245	12.6747	19.4995
808	14.7333	15.1666	19.8245	18.1995	12.3497	19.8245
809	14.95	15.1666	19.8245	18.1995	12.9997	19.8245
810	14.7333	15.1666	20.1495	18.5245	12.9997	19.1745
811	14.95	15.3833	20.1495	18.1995	13.6497	19.4995
812	14.7333	15.3833	19.8245	18.5245	13.3247	19.1745
813	15.1666	15.1666	20.1495	18.1995	13.3247	19.1745
814	14.95	15.3833	19.8245	18.1995	12.9997	18.8495
815	14.95	15.1666	19.8245	18.5245	12.9997	18.8495
816	14.95	15.1666	20.1495	18.5245	12.9997	19.1745
817	14.95	15.1666	19.8245	18.1995	13.3247	18.8495
818	14.95	15.1666	19.8245	18.1995	12.9997	19.4995
819	14.95	15.1666	19.8245	18.1995	12.9997	19.4995
820	14.95	15.1666	19.4995	17.8746	12.9997	19.4995
821	14.95	15.3833	20.1495	18.1995	12.9997	19.1745
822	15.1666	15.3833	19.4995	18.1995	12.9997	18.8495
823	14.95	15.1666	19.8245	18.5245	13.3247	18.8495
824	14.95	15.1666	19.4995	18.5245	12.9997	18.8495
825	14.7333	15.3833	20.1495	18.5245	12.9997	19.1745
826	14.95	15.1666	19.4995	18.5245	12.9997	19.1745
827	14.95	15.3833	19.8245	18.5245	12.9997	19.4995
828	14.95	15.1666	19.8245	17.8746	12.9997	19.4995
829	14.95	15.1666	19.8245	18.1995	12.9997	19.4995
830	15.1666	15.1666	19.4995	18.1995	12.9997	19.1745
831	14.95	15.3833	20.1495	18.1995	12.9997	19.4995
832	14.7333	15.3833	19.8245	18.1995	12.9997	19.4995
833	14.95	15.1666	20.1495	18.5245	12.6747	19.1745
834	14.95	15.1666	19.8245	18.5245	12.6747	19.4995
835	14.95	15.3833	20.1495	18.5245	12.6747	19.1745
836	14.95	15.3833	19.8245	18.5245	12.6747	19.4995
837	14.95	15.3833	19.8245	18.1995	12.9997	19.4995
838	14.95	15.1666	19.8245	17.8746	13.3247	19.1745
839	14.95	15.1666	19.4995	18.1995	13.3247	19.8245
840	14.95	15.3833	19.8245	18.1995	13.3247	19.4995
841	14.7333	15.1666	20.1495	18.1995	13.3247	19.4995
842	14.95	15.5999	19.8245	18.5245	12.9997	19.4995
843	14.7333	15.1666	19.8245	18.1995	13.3247	19.4995
844	14.7333	15.3833	20.1495	18.1995	13.3247	19.4995
845	14.95	15.1666	19.8245	18.1995	13.3247	19.8245
846	14.95	15.1666	20.4745	18.1995	13.6497	19.4995
847	14.95	15.3833	20.1495	18.5245	13.3247	19.8245
848	14.95	15.1666	19.8245	18.5245	12.9997	19.4995
849	14.7333	15.3833	19.8245	18.5245	13.3247	19.4995
850	14.95	15.3833	20.1495	18.5245	12.9997	19.8245
851	14.95	15.1666	20.1495	18.1995	13.3247	19.4995
852	14.95	15.1666	19.8245	18.1995	13.3247	19.4995
853	14.95	15.3833	19.8245	18.8495	12.9997	19.4995
854	14.95	15.3833	19.8245	18.5245	13.3247	19.8245
855	14.95	15.1666	19.8245	18.1995	13.3247	19.4995
856	14.95	15.1666	20.1495	18.1995	13.3247	19.4995
857	14.95	15.1666	20.1495	18.8495	12.9997	19.8245
858	14.95	15.1666	19.8245	18.8495	12.9997	19.8245
859	15.1666	15.3833	19.8245	18.8495	12.9997	19.4995
860	14.95	15.1666	20.1495	19.4995	13.3247	19.4995
861	14.95	15.3833	20.1495	19.1745	12.9997	19.8245
862	14.95	15.3833	20.1495	19.1745	12.9997	19.1745
863	14.95	15.1666	19.8245	18.8495	12.6747	19.8245
864	14.95	15.1666	19.8245	19.1745	13.3247	19.8245
865	14.7333	15.3833	19.4995	18.5245	13.3247	19.8245
866	14.95	15.3833	20.1495	18.8495	13.3247	18.8495
867	14.95	15.3833	19.8245	18.8495	13.9747	19.8245
868	14.7333	15.1666	19.8245	18.5245	13.6497	19.8245
869	14.95	15.3833	20.1495	18.8495	13.3247	19.8245
870	14.95	15.3833	19.8245	18.8495	13.3247	19.4995
871	14.95	15.1666	20.1495	18.8495	13.3247	18.8495
872	14.95	15.3833	19.8245	18.8495	13.3247	19.8245
873	15.3833	15.1666	20.1495	19.1745	12.9997	19.8245
874	15.1666	15.1666	19.8245	18.5245	13.3247	19.8245
875	15.1666	15.3833	19.4995	18.5245	13.6497	20.1495
876	14.95	15.3833	19.4995	18.8495	13.3247	19.8245
877	14.95	15.3833	19.4995	18.5245	13.9747	19.8245
878	14.95	15.3833	19.4995	18.8495	12.6747	19.8245
879	14.95	15.1666	19.8245	18.8495	12.6747	19.8245
880	14.95	15.1666	19.8245	18.8495	13.3247	19.8245
881	14.95	15.1666	19.8245	19.1745	12.6747	20.1495
882	14.95	15.1666	20.1495	18.8495	12.9997	19.1745
883	15.1666	15.3833	20.1495	18.8495	12.9997	19.8245
884	14.95	15.1666	19.4995	18.5245	12.9997	19.4995
885	14.95	15.3833	20.1495	18.8495	13.6497	19.4995
886	14.95	15.1666	20.1495	18.8495	13.3247	20.1495
887	14.7333	15.3833	19.8245	18.8495	12.9997	19.4995
888	14.7333	15.3833	20.1495	19.1745	13.3247	19.4995
889	15.1666	15.1666	20.1495	18.5245	12.9997	19.1745
890	14.95	15.1666	19.4995	18.8495	12.9997	19.4995
891	15.1666	15.1666	19.8245	18.5245	13.3247	19.8245
892	14.95	15.1666	20.1495	18.8495	12.9997	19.8245
893	14.95	15.1666	20.1495	18.8495	13.3247	19.8245
894	14.95	15.1666	20.1495	18.8495	12.9997	19.4995
895	15.1666	15.1666	19.8245	18.8495	13.3247	19.4995
896	15.1666	15.3833	19.8245	18.8495	12.6747	19.4995
897	14.95	15.1666	20.1495	18.8495	13.6497	19.4995
898	14.95	15.1666	19.8245	18.8495	13.3247	19.4995
899	14.95	15.3833	19.8245	18.8495	12.9997	19.8245
900	14.95	15.1666	19.8245	18.5245	12.9997	19.8245
901	14.95	15.3833	19.8245	18.8495	12.9997	19.4995
902	14.7333	15.1666	19.4995	18.8495	12.9997	19.4995
903	15.1666	15.1666	19.8245	18.5245	13.3247	19.4995
904	14.95	15.3833	19.8245	18.8495	12.9997	19.4995
905	14.95	15.1666	20.1495	19.1745	12.9997	19.8245
906	15.1666	15.3833	20.1495	18.8495	12.9997	19.4995
907	14.95	15.3833	19.4995	19.1745	12.9997	19.8245
908	15.1666	15.1666	19.8245	18.8495	12.9997	19.8245
909	14.7333	15.3833	19.4995	18.5245	12.9997	19.4995
910	15.1666	15.1666	20.1495	18.8495	13.3247	19.8245
911	14.95	15.1666	19.8245	18.8495	12.9997	19.8245
912	15.1666	15.1666	19.1745	18.8495	13.3247	19.4995
913	14.7333	15.3833	19.4995	18.8495	12.9997	19.8245
914	14.95	15.1666	20.1495	18.8495	12.9997	19.8245
915	14.95	15.3833	19.4995	18.8495	12.9997	19.4995
916	15.1666	15.3833	19.8245	18.8495	12.6747	19.8245
917	15.1666	15.3833	20.1495	18.8495	13.3247	19.8245
918	15.1666	15.1666	19.4995	18.8495	12.9997	19.8245
919	14.95	15.1666	20.1495	18.8495	12.9997	19.4995
920	14.7333	15.3833	20.1495	18.8495	12.6747	19.4995
921	14.95	15.5999	19.8245	18.8495	12.6747	19.8245
922	14.95	15.1666	19.8245	18.5245	12.9997	19.8245
923	15.1666	15.1666	19.4995	18.8495	12.9997	19.8245
924	15.1666	15.1666	19.8245	18.8495	12.6747	19.8245
925	14.95	15.3833	19.8245	18.8495	12.6747	20.1495
926	15.1666	15.1666	19.8245	18.8495	12.3497	19.8245
927	15.1666	15.3833	19.8245	18.8495	12.6747	19.4995
928	15.1666	15.3833	19.8245	18.8495	12.6747	19.8245
929	15.1666	15.3833	19.8245	18.8495	12.6747	19.8245
930	15.1666	15.3833	19.8245	18.8495	12.6747	19.4995
931	15.1666	15.1666	19.8245	18.8495	12.6747	19.8245
932	15.1666	15.3833	20.1495	18.5245	12.9997	19.8245
933	14.95	15.1666	19.4995	18.8495	12.6747	19.8245
934	14.95	15.3833	19.4995	18.8495	12.9997	19.8245
935	15.1666	15.3833	19.8245	18.5245	12.6747	19.8245
936	15.1666	15.1666	19.4995	19.1745	12.9997	19.8245
937	14.95	15.1666	19.4995	18.8495	12.9997	19.8245
938	15.1666	15.1666	19.1745	18.5245	12.6747	20.1495
939	14.95	15.3833	19.8245	18.8495	12.9997	20.1495
940	14.95	15.1666	19.8245	18.8495	12.6747	19.8245
941	15.1666	15.3833	19.8245	18.8495	12.9997	19.8245
942	15.1666	15.1666	19.4995	18.5245	12.6747	20.1495
943	14.95	15.1666	19.4995	19.1745	12.9997	19.8245
944	15.1666	15.1666	19.8245	18.5245	12.6747	19.8245
945	15.1666	15.5999	19.8245	18.8495	12.6747	19.8245
946	15.1666	15.1666	19.1745	18.8495	12.6747	19.8245
947	15.1666	15.3833	19.8245	18.8495	13.3247	19.8245
948	15.3833	15.1666	19.4995	18.5245	13.3247	19.8245
949	15.1666	15.5999	19.4995	18.8495	12.9997	19.8245
950	15.1666	15.3833	19.8245	18.8495	13.3247	19.4995
951	15.1666	15.3833	19.8245	18.8495	12.9997	19.8245
952	15.1666	15.1666	19.8245	18.8495	12.9997	20.1495
953	15.1666	15.1666	19.8245	18.8495	13.3247	19.8245
954	15.1666	15.3833	19.8245	18.8495	12.9997	19.8245
955	15.1666	15.1666	19.8245	18.5245	12.9997	20.1495
956	14.95	15.1666	19.8245	18.8495	12.6747	19.8245
957	15.1666	15.1666	19.8245	18.8495	12.6747	19.8245
958	15.1666	15.3833	19.8245	18.8495	12.6747	19.8245
959	15.1666	15.3833	19.4995	18.8495	12.6747	20.1495
960	15.1666	15.3833	19.8245	18.8495	12.9997	19.8245
961	15.1666	15.3833	19.8245	18.8495	12.9997	20.1495
962	15.1666	15.3833	19.8245	18.8495	12.6747	19.8245
963	14.95	15.3833	19.4995	18.5245	12.9997	20.1495
964	15.1666	15.1666	19.4995	18.8495	12.9997	20.1495
965	15.3833	15.3833	20.1495	18.8495	12.9997	19.8245
966	15.1666	15.5999	20.4745	18.8495	13.3247	20.1495
967	15.1666	15.1666	19.8245	18.8495	12.6747	20.1495
968	15.1666	15.3833	19.4995	18.8495	13.3247	20.1495
969	15.1666	15.3833	19.8245	18.8495	13.3247	20.1495
970	15.1666	15.3833	19.4995	18.8495	12.9997	20.1495
971	15.1666	15.3833	19.8245	18.5245	13.3247	20.1495
972	15.1666	15.3833	19.8245	18.8495	12.9997	19.8245
973	14.95	15.1666	20.1495	18.8495	13.3247	20.1495
974	15.1666	15.3833	19.8245	18.5245	12.9997	20.1495
975	15.1666	15.3833	19.8245	18.8495	12.9997	20.1495
976	15.1666	15.5999	20.1495	18.8495	13.3247	20.1495
977	15.1666	15.1666	19.8245	18.8495	12.9997	20.1495
978	15.1666	15.1666	19.8245	18.8495	13.3247	20.1495
979	14.95	15.3833	19.8245	18.8495	12.9997	20.1495
980	15.1666	15.3833	19.8245	18.8495	12.9997	20.1495
981	15.1666	15.3833	19.4995	18.8495	13.3247	20.4745
982	15.1666	15.3833	19.8245	18.8495	13.3247	20.1495
983	15.1666	15.3833	19.8245	19.1745	13.3247	20.1495
984	14.95	15.3833	20.1495	18.8495	13.3247	20.1495
985	15.1666	15.3833	19.8245	18.8495	13.3247	20.1495
986	15.1666	15.1666	19.8245	19.1745	13.3247	20.1495
987	14.95	15.3833	19.8245	18.8495	13.3247	19.8245
988	14.95	15.3833	19.8245	19.1745	13.3247	20.1495
989	14.95	15.3833	19.4995	18.8495	12.9997	20.1495
990	14.95	15.3833	19.8245	18.8495	12.9997	20.1495
991	15.1666	15.5999	19.8245	18.8495	12.9997	20.1495
992	14.95	15.1666	19.8245	18.5245	12.9997	20.1495
993	14.95	15.3833	19.8245	18.8495	13.3247	20.1495
994	15.1666	15.3833	19.4995	18.8495	13.6497	20.1495
995	14.95	15.1666	19.8245	18.8495	13.3247	20.1495
996	14.7333	15.1666	19.1745	18.8495	13.3247	20.1495
997	15.1666	15.3833	19.1745	18.8495	13.3247	19.8245
998	14.95	15.3833	19.8245	18.8495	12.9997	20.1495
999	14.95	15.3833	19.4995	18.5245	12.9997	20.1495
1000	15.1666	15.3833	19.8245	18.8495	12.9997	20.1495
1001	14.95	15.1666	20.1495	18.8495	12.9997	20.1495
1002	14.7333	15.3833	19.8245	18.8495	12.9997	20.1495
1003	14.95	15.1666	19.4995	18.8495	13.3247	20.1495
1004	15.1666	15.3833	19.4995	18.8495	13.3247	20.1495
1005	15.1666	15.3833	19.4995	18.5245	13.3247	20.1495
1006	14.95	15.3833	19.8245	18.8495	13.3247	20.1495
1007	14.95	15.3833	20.1495	18.8495	13.6497	20.4745
1008	14.95	15.3833	19.8245	18.8495	13.6497	19.8245
1009	15.1666	15.1666	19.4995	18.8495	13.3247	20.1495
1010	15.1666	15.3833	19.8245	18.8495	12.9997	20.1495
1011	14.95	15.3833	19.1745	18.8495	12.9997	19.8245
1012	14.95	15.3833	20.1495	18.8495	13.3247	20.1495
1013	15.1666	15.3833	19.8245	18.5245	12.9997	20.1495
1014	15.1666	15.3833	19.1745	18.8495	13.3247	20.1495
1015	14.95	15.3833	19.4995	18.8495	13.3247	20.1495
1016	15.1666	15.1666	20.1495	18.8495	13.3247	20.1495
1017	14.95	15.3833	20.4745	18.5245	12.6747	20.1495
1018	14.95	15.3833	19.4995	18.5245	13.3247	20.1495
1019	14.7333	15.3833	19.4995	19.1745	12.9997	20.1495
1020	14.95	15.3833	19.4995	18.8495	13.3247	19.8245
1021	14.95	15.3833	19.8245	18.8495	13.6497	20.1495
1022	14.95	15.3833	19.8245	18.8495	13.6497	19.8245
1023	14.95	15.3833	19.8245	18.8495	13.3247	19.8245
1024	15.1666	15.3833	19.8245	18.8495	13.3247	20.1495
1025	14.95	15.3833	19.8245	18.5245	13.3247	19.8245
1026	14.95	15.3833	19.4995	19.1745	12.9997	19.8245
1027	14.7333	15.3833	19.4995	18.5245	13.3247	19.8245
1028	14.95	15.3833	19.8245	18.8495	13.3247	20.1495
1029	15.1666	15.3833	19.8245	18.8495	12.9997	19.8245
1030	14.7333	15.5999	20.1495	18.8495	13.3247	20.1495
1031	14.95	15.3833	19.4995	18.8495	12.9997	20.1495
1032	14.95	15.3833	19.8245	18.5245	13.3247	19.8245
1033	14.7333	15.3833	19.8245	19.1745	12.9997	19.8245
1034	14.95	15.1666	20.1495	18.8495	13.3247	19.8245
1035	15.1666	15.1666	19.8245	18.8495	12.9997	19.8245
1036	15.1666	15.3833	19.8245	18.5245	12.9997	19.8245
1037	14.95	15.3833	19.8245	18.8495	12.9997	20.1495
1038	14.95	15.3833	20.1495	18.8495	12.6747	20.1495
1039	14.95	15.3833	19.8245	18.8495	12.9997	20.1495
1040	14.95	15.3833	19.8245	19.1745	12.9997	19.8245
1041	15.1666	15.3833	19.8245	18.5245	12.6747	20.1495
1042	14.95	15.3833	19.8245	18.8495	12.9997	19.8245
1043	14.95	15.1666	19.8245	18.8495	12.6747	20.1495
1044	15.1666	15.3833	19.4995	18.8495	12.6747	20.1495
1045	14.95	15.1666	19.4995	18.8495	12.6747	20.1495
1046	14.95	15.3833	19.4995	18.5245	12.9997	20.1495
1047	14.95	15.3833	19.8245	18.8495	12.6747	19.8245
1048	14.7333	15.3833	19.8245	18.5245	12.3497	20.1495
1049	14.95	15.3833	19.4995	18.8495	12.6747	20.1495
1050	14.95	15.3833	19.8245	18.5245	12.3497	20.1495
1051	15.1666	15.3833	19.4995	18.5245	12.6747	20.1495
1052	14.95	15.3833	19.8245	19.1745	12.6747	20.1495
1053	14.95	15.3833	19.4995	18.8495	12.6747	20.1495
1054	14.95	15.3833	19.8245	18.8495	12.3497	20.1495
1055	14.7333	15.3833	19.4995	18.5245	12.6747	20.4745
1056	15.1666	15.5999	19.8245	18.5245	12.9997	20.1495
1057	15.1666	15.3833	19.8245	18.8495	12.6747	20.1495
1058	15.1666	15.5999	19.4995	18.8495	12.6747	20.1495
1059	15.1666	15.3833	20.1495	18.5245	12.9997	20.1495
1060	14.95	15.3833	20.1495	18.8495	12.9997	20.1495
1061	15.1666	15.3833	19.8245	18.8495	12.6747	20.1495
1062	15.1666	15.3833	19.8245	18.8495	13.3247	20.1495
1063	14.95	15.5999	20.1495	19.1745	12.9997	20.1495
1064	14.95	15.3833	19.8245	18.5245	13.3247	20.1495
1065	14.95	15.3833	20.1495	18.8495	12.9997	20.1495
1066	15.1666	15.3833	19.1745	18.5245	12.6747	20.1495
1067	14.95	15.5999	19.8245	18.8495	12.9997	20.4745
1068	14.95	15.1666	19.8245	18.8495	13.3247	20.1495
1069	15.1666	15.3833	20.1495	18.5245	13.3247	20.1495
1070	15.1666	15.3833	19.8245	18.8495	12.9997	20.1495
1071	15.1666	15.3833	20.1495	18.8495	13.3247	20.1495
1072	15.1666	15.3833	19.4995	18.8495	13.3247	20.1495
1073	14.95	15.3833	19.8245	18.8495	13.3247	20.1495
1074	15.1666	15.3833	19.4995	18.8495	13.3247	20.1495
1075	15.1666	15.3833	19.8245	18.8495	13.6497	20.1495
1076	15.1666	15.3833	19.8245	18.1995	12.9997	20.1495
1077	14.95	15.1666	19.8245	19.1745	13.3247	20.1495
1078	15.1666	15.3833	19.8245	18.8495	13.3247	20.1495
1079	15.1666	15.3833	19.8245	18.8495	12.9997	20.1495
1080	15.1666	15.3833	20.1495	19.1745	12.9997	19.8245
1081	15.1666	15.1666	19.8245	18.8495	12.9997	20.1495
1082	15.1666	15.3833	19.8245	18.8495	12.9997	20.1495
1083	14.95	15.3833	19.4995	18.8495	12.9997	19.8245
1084	15.1666	15.3833	19.4995	19.1745	13.3247	19.8245
1085	15.1666	15.3833	19.4995	18.8495	12.9997	20.1495
1086	15.1666	15.3833	19.8245	18.8495	12.9997	20.1495
1087	15.1666	15.3833	19.4995	18.8495	12.9997	20.1495
1088	15.1666	15.3833	20.1495	18.1995	12.6747	19.8245
1089	15.1666	15.1666	19.8245	18.8495	12.6747	19.8245
1090	15.1666	15.1666	19.8245	18.8495	12.9997	20.1495
1091	15.1666	15.3833	19.8245	18.8495	12.9997	19.8245
1092	15.1666	15.3833	19.4995	18.8495	12.6747	20.1495
1093	14.95	15.1666	19.4995	18.8495	12.3497	20.1495
1094	15.1666	15.3833	19.8245	18.8495	12.0247	19.8245
1095	15.1666	15.1666	20.1495	18.8495	12.0247	19.8245
1096	15.1666	15.3833	20.1495	18.8495	12.3497	19.8245
1097	15.1666	15.3833	20.1495	18.5245	12.3497	20.1495
1098	15.1666	15.1666	19.8245	18.8495	12.6747	19.8245
1099	15.1666	15.1666	19.8245	18.8495	12.9997	19.8245
1100	15.1666	15.1666	19.4995	18.8495	12.3497	20.1495
1101	15.1666	15.5999	20.1495	18.5245	12.3497	19.8245
1102	14.95	15.1666	19.8245	18.8495	12.0247	20.1495
1103	15.1666	15.3833	19.4995	18.5245	12.3497	19.8245
1104	15.1666	15.1666	19.1745	18.8495	12.3497	19.8245
1105	14.95	15.1666	19.8245	18.8495	12.3497	20.1495
1106	15.1666	15.1666	20.1495	18.5245	12.0247	19.8245
1107	15.1666	15.3833	19.8245	18.8495	12.6747	19.8245
1108	15.1666	15.3833	19.8245	18.8495	12.3497	20.1495
1109	15.1666	15.3833	20.1495	18.8495	12.9997	19.8245
1110	15.1666	15.1666	19.4995	18.8495	12.3497	19.8245
1111	15.3833	15.1666	19.8245	18.5245	12.9997	19.8245
1112	15.1666	15.1666	19.8245	18.5245	12.3497	20.1495
1113	15.1666	14.95	20.1495	19.1745	12.3497	20.1495
1114	15.1666	15.1666	19.8245	18.8495	12.3497	19.8245
1115	15.1666	15.1666	19.4995	18.8495	12.3497	19.8245
1116	15.3833	15.3833	19.8245	18.8495	12.6747	20.1495
1117	15.1666	15.1666	19.8245	18.8495	12.3497	19.8245
1118	15.1666	15.1666	19.4995	18.5245	12.3497	19.8245
1119	15.1666	15.1666	19.8245	18.8495	12.6747	19.8245
1120	14.95	15.3833	19.8245	18.5245	12.3497	20.1495
1121	15.1666	15.1666	19.4995	18.8495	12.3497	19.8245
1122	15.1666	15.3833	20.1495	18.8495	12.6747	19.8245
1123	15.1666	15.1666	19.4995	18.8495	12.0247	19.8245
1124	15.1666	15.3833	19.8245	18.8495	12.9997	19.8245
1125	15.1666	15.3833	19.8245	18.8495	12.9997	19.8245
1126	15.1666	15.3833	19.8245	18.8495	12.6747	19.8245
1127	15.1666	15.1666	19.8245	18.8495	12.6747	20.1495
1128	15.1666	15.1666	19.4995	18.8495	12.3497	19.8245
1129	15.1666	15.3833	19.8245	18.8495	12.6747	19.8245
1130	15.3833	15.1666	19.1745	18.8495	12.6747	19.8245
1131	15.1666	15.1666	19.8245	18.8495	12.9997	19.8245
1132	15.3833	15.3833	19.8245	18.8495	12.6747	19.8245
1133	15.1666	15.3833	19.8245	18.8495	12.6747	19.8245
1134	15.1666	15.1666	19.8245	18.8495	12.6747	20.1495
1135	15.1666	15.5999	19.8245	18.8495	12.6747	19.8245
1136	15.1666	15.3833	20.1495	19.1745	12.6747	20.1495
1137	15.1666	15.1666	19.8245	18.5245	12.6747	19.8245
1138	15.1666	15.3833	19.8245	18.8495	12.6747	19.8245
1139	15.1666	15.3833	19.8245	18.8495	12.6747	19.8245
1140	15.1666	15.1666	19.8245	18.8495	12.6747	19.8245
1141	14.95	15.1666	19.4995	18.8495	12.6747	19.8245
1142	15.1666	15.1666	19.4995	18.8495	12.6747	19.8245
1143	15.1666	15.1666	20.1495	18.5245	12.9997	19.8245
1144	15.1666	15.1666	19.8245	18.5245	12.9997	19.8245
1145	15.1666	15.1666	20.1495	18.8495	12.6747	19.8245
1146	14.95	15.5999	20.1495	18.8495	12.6747	19.8245
1147	15.1666	15.5999	19.4995	18.5245	12.6747	19.8245
1148	15.1666	15.5999	19.8245	18.8495	12.6747	19.8245
1149	15.1666	15.3833	19.4995	18.8495	12.6747	19.8245
1150	15.1666	15.1666	19.8245	18.8495	12.6747	19.8245
1151	15.1666	15.1666	20.1495	18.8495	12.6747	20.1495
1152	15.3833	15.3833	19.8245	18.5245	12.6747	19.8245
1153	15.1666	15.3833	19.8245	18.5245	12.6747	19.8245
1154	15.3833	15.3833	19.4995	18.8495	12.6747	19.8245
1155	15.1666	15.3833	20.1495	18.8495	12.3497	19.8245
1156	15.1666	15.3833	20.1495	18.8495	12.6747	19.8245
1157	15.1666	15.1666	20.1495	18.5245	12.3497	19.8245
1158	15.1666	15.1666	19.8245	18.5245	12.3497	19.8245
1159	14.95	15.3833	20.1495	18.1995	12.3497	19.8245
1160	15.1666	15.8166	20.1495	18.5245	12.0247	19.8245
1161	15.1666	15.5999	20.1495	18.8495	12.6747	19.8245
1162	15.1666	15.5999	19.4995	18.5245	12.6747	20.1495
1163	15.1666	15.5999	19.4995	18.8495	12.0247	20.1495
1164	15.1666	15.3833	19.8245	18.5245	12.3497	19.8245
1165	15.1666	15.5999	19.8245	19.1745	12.3497	19.8245
1166	15.1666	15.5999	19.8245	18.8495	12.3497	20.1495
1167	15.3833	15.8166	19.4995	18.8495	12.6747	19.8245
1168	15.1666	15.5999	19.4995	18.8495	12.3497	20.1495
1169	14.95	15.3833	20.1495	18.8495	12.6747	20.1495
1170	15.3833	15.5999	19.4995	18.5245	12.6747	19.8245
1171	15.1666	15.1666	20.1495	18.5245	12.6747	20.1495
1172	15.1666	15.5999	20.1495	18.5245	12.3497	19.8245
1173	15.1666	15.5999	19.8245	18.8495	12.6747	20.1495
1174	15.1666	15.5999	19.8245	18.5245	12.6747	20.1495
1175	15.1666	15.5999	19.8245	18.1995	12.3497	19.8245
1176	15.1666	15.3833	19.8245	18.8495	12.6747	20.1495
1177	15.1666	15.5999	19.8245	18.8495	12.3497	20.1495
1178	15.1666	15.5999	19.8245	18.5245	12.3497	20.1495
1179	15.1666	15.5999	19.8245	18.5245	12.6747	20.1495
1180	15.1666	15.3833	20.1495	18.5245	12.6747	19.8245
1181	15.1666	15.5999	19.8245	18.8495	12.6747	20.1495
1182	15.1666	15.5999	19.8245	18.8495	12.6747	20.1495
1183	15.1666	15.5999	19.8245	18.5245	12.3497	20.1495
1184	15.1666	15.5999	20.1495	18.8495	12.3497	20.1495
1185	15.1666	15.5999	19.8245	18.5245	12.6747	20.1495
1186	15.1666	15.5999	19.8245	18.8495	12.6747	20.1495
1187	15.1666	15.3833	20.1495	18.5245	12.6747	20.1495
1188	15.1666	15.3833	19.4995	18.5245	12.6747	19.8245
1189	15.1666	15.3833	20.1495	18.8495	12.6747	20.1495
1190	15.1666	15.5999	20.1495	18.5245	12.6747	20.1495
1191	15.1666	15.3833	19.8245	18.5245	12.3497	20.1495
1192	14.95	15.5999	20.1495	18.5245	12.6747	19.8245
1193	15.1666	15.5999	19.8245	18.8495	12.6747	20.1495
1194	14.95	15.3833	19.8245	18.5245	12.3497	20.1495
1195	15.1666	15.5999	19.8245	18.5245	12.3497	20.4745
1196	15.1666	15.5999	19.4995	18.5245	12.6747	20.1495
1197	15.1666	15.5999	19.1745	18.8495	12.6747	20.1495
1198	15.1666	15.3833	19.4995	18.5245	12.6747	20.4745
1199	15.1666	15.5999	19.8245	18.8495	12.6747	20.1495
1200	15.1666	15.3833	19.8245	18.8495	12.6747	20.4745
1201	15.1666	15.5999	19.4995	18.8495	12.6747	20.1495
1202	15.1666	15.5999	19.8245	18.8495	12.6747	19.8245
1203	15.1666	15.3833	19.8245	18.8495	12.6747	20.1495
1204	15.1666	15.3833	19.8245	18.5245	12.6747	19.8245
1205	15.1666	15.3833	19.8245	18.5245	12.6747	20.1495
1206	15.1666	15.5999	19.8245	19.1745	12.6747	20.1495
1207	15.1666	15.3833	19.8245	18.5245	12.6747	20.1495
1208	15.3833	15.5999	20.1495	18.5245	12.6747	20.1495
1209	14.95	15.5999	20.1495	18.8495	12.6747	20.1495
1210	15.1666	15.5999	19.4995	18.5245	12.3497	20.4745
1211	15.3833	15.5999	19.8245	18.5245	12.6747	20.1495
1212	15.1666	15.3833	19.8245	18.8495	12.6747	20.1495
1213	15.1666	15.3833	19.8245	18.8495	12.6747	20.1495
1214	15.1666	15.3833	19.8245	18.5245	12.6747	20.1495
1215	15.1666	15.3833	19.8245	18.8495	12.6747	20.1495
1216	15.1666	15.3833	19.8245	18.5245	12.6747	20.1495
1217	15.1666	15.5999	19.8245	18.5245	12.6747	20.1495
1218	15.1666	15.5999	19.8245	18.8495	12.6747	19.8245
1219	15.1666	15.5999	19.8245	18.5245	12.6747	20.4745
1220	15.1666	15.5999	19.8245	18.5245	12.6747	20.1495
1221	15.3833	15.3833	19.4995	18.5245	12.9997	20.4745
1222	15.1666	15.5999	19.8245	18.5245	12.6747	20.4745
1223	14.95	15.3833	19.8245	18.5245	12.3497	20.1495
1224	15.1666	15.3833	19.8245	18.5245	12.3497	20.4745
1225	15.1666	15.5999	19.8245	18.8495	12.3497	20.4745
1226	14.95	15.3833	19.8245	18.8495	12.6747	20.4745
1227	15.1666	15.3833	19.8245	18.5245	12.6747	20.1495
1228	14.95	15.5999	19.8245	18.5245	12.6747	19.8245
1229	15.1666	15.5999	19.8245	18.1995	12.6747	20.1495
1230	15.3833	15.3833	20.1495	18.8495	12.6747	20.1495
1231	15.1666	15.5999	20.1495	18.8495	12.6747	20.4745
1232	14.95	15.5999	19.8245	18.8495	12.6747	20.1495
1233	15.1666	15.5999	19.8245	18.5245	12.6747	20.4745
1234	14.95	15.3833	19.8245	18.5245	12.6747	20.4745
1235	15.3833	15.3833	19.8245	18.8495	12.6747	20.4745
1236	15.1666	15.5999	19.4995	18.8495	12.6747	20.4745
1237	15.1666	15.5999	20.1495	18.8495	12.6747	20.1495
1238	15.3833	15.3833	19.8245	18.5245	12.6747	20.1495
1239	14.95	15.5999	19.8245	18.8495	12.6747	19.8245
1240	15.1666	15.3833	19.8245	18.5245	12.6747	20.1495
1241	15.1666	15.5999	19.8245	18.8495	12.6747	20.4745
1242	15.3833	15.5999	20.1495	18.8495	12.6747	20.1495
1243	15.1666	15.5999	19.8245	18.5245	12.6747	20.1495
1244	15.1666	15.5999	19.8245	18.5245	12.6747	20.4745
1245	15.1666	15.1666	20.1495	18.8495	12.6747	20.1495
1246	15.1666	15.3833	19.8245	18.8495	12.9997	20.1495
1247	15.1666	15.5999	19.8245	18.5245	12.6747	20.4745
1248	15.1666	15.5999	19.4995	18.8495	12.6747	20.4745
1249	15.1666	15.5999	20.1495	18.8495	12.6747	20.4745
1250	15.5999	15.5999	20.4745	18.5245	12.6747	20.4745
1251	14.95	15.5999	20.1495	18.5245	12.6747	20.1495
1252	14.95	15.5999	19.8245	18.5245	12.6747	20.4745
1253	15.1666	15.5999	20.1495	18.1995	12.6747	20.1495
1254	15.1666	15.5999	19.8245	18.5245	12.6747	20.1495
1255	14.95	15.5999	19.4995	18.5245	12.9997	20.4745
1256	15.1666	15.5999	19.8245	18.5245	12.6747	20.1495
1257	15.3833	15.5999	19.8245	19.1745	12.6747	20.1495
1258	15.1666	15.5999	19.8245	18.8495	12.6747	20.4745
1259	15.1666	15.3833	20.1495	18.8495	12.6747	20.1495
1260	14.95	15.3833	20.1495	18.5245	12.6747	20.1495
1261	15.1666	15.5999	19.8245	18.5245	12.6747	20.4745
1262	15.1666	15.5999	19.8245	18.5245	12.6747	20.1495
1263	14.95	15.5999	19.8245	18.5245	12.6747	20.4745
1264	15.1666	15.3833	19.8245	18.5245	12.6747	20.4745
1265	15.3833	15.5999	20.1495	18.8495	12.9997	20.4745
1266	15.3833	15.5999	20.1495	18.5245	12.6747	20.4745
1267	15.3833	15.5999	19.8245	18.5245	12.6747	20.1495
1268	14.95	15.3833	19.8245	18.5245	12.6747	20.1495
1269	15.1666	15.5999	19.8245	18.5245	12.6747	20.4745
1270	15.1666	15.5999	19.4995	18.1995	12.6747	20.4745
1271	15.3833	15.3833	20.1495	18.8495	12.6747	19.8245
1272	15.3833	15.5999	20.1495	18.5245	12.6747	20.4745
1273	15.3833	15.5999	20.1495	18.5245	12.6747	19.8245
1274	15.1666	15.5999	19.8245	18.5245	12.6747	19.8245
1275	15.3833	15.5999	20.1495	18.8495	12.6747	20.4745
1276	15.3833	15.5999	19.8245	18.5245	12.6747	19.8245
1277	15.3833	15.3833	19.8245	18.8495	12.6747	20.1495
1278	15.1666	15.3833	19.8245	18.8495	12.6747	20.1495
1279	15.3833	15.5999	19.8245	18.8495	12.6747	20.1495
1280	15.1666	15.3833	19.4995	18.5245	12.6747	20.4745
1281	15.3833	15.3833	19.8245	18.5245	12.6747	20.4745
1282	15.3833	15.5999	19.1745	18.5245	12.6747	20.1495
1283	15.1666	15.8166	20.1495	18.5245	12.9997	20.1495
1284	15.1666	15.5999	19.4995	18.1995	12.6747	20.4745
1285	15.1666	15.3833	19.1745	18.1995	12.6747	20.4745
1286	15.1666	15.3833	19.4995	18.5245	12.6747	20.4745
1287	15.1666	15.3833	19.1745	18.1995	12.9997	20.4745
1288	15.1666	15.5999	19.8245	18.5245	12.6747	20.4745
1289	15.1666	15.5999	19.8245	18.5245	12.6747	20.1495
1290	15.1666	15.3833	19.4995	18.5245	12.6747	19.8245
1291	15.1666	15.3833	19.4995	18.8495	12.6747	20.1495
1292	15.3833	15.5999	19.4995	18.8495	12.6747	20.4745
1293	15.3833	15.3833	19.4995	18.5245	12.6747	19.8245
1294	15.3833	15.3833	19.8245	18.5245	12.6747	19.8245
1295	15.3833	15.3833	19.8245	18.5245	12.6747	20.4745
1296	15.1666	15.3833	19.8245	18.8495	12.6747	20.4745
1297	15.3833	15.5999	19.1745	18.8495	12.6747	20.4745
1298	15.3833	15.5999	20.1495	18.5245	12.6747	20.1495
1299	15.1666	15.3833	19.8245	18.1995	12.6747	20.4745
1300	15.1666	15.5999	19.8245	18.5245	12.6747	20.4745
1301	15.3833	15.3833	19.8245	18.5245	12.9997	20.1495
1302	15.1666	15.3833	20.1495	18.5245	12.6747	20.4745
1303	15.3833	15.5999	19.4995	18.5245	12.9997	20.4745
1304	15.3833	15.5999	19.8245	18.5245	12.9997	20.4745
1305	15.3833	15.5999	19.4995	18.5245	12.6747	20.4745
1306	15.1666	15.5999	19.4995	18.8495	12.9997	20.4745
1307	15.3833	15.5999	19.8245	18.5245	12.6747	20.4745
1308	15.1666	15.5999	20.1495	18.5245	12.9997	20.4745
1309	15.3833	15.3833	19.4995	18.5245	12.9997	20.4745
1310	15.3833	15.5999	19.8245	18.5245	12.6747	20.4745
1311	15.3833	15.3833	19.4995	18.5245	12.9997	20.4745
1312	15.3833	15.5999	19.8245	18.8495	12.6747	20.1495
1313	15.3833	15.3833	19.8245	18.8495	12.6747	20.1495
1314	15.3833	15.3833	19.4995	18.5245	12.6747	20.1495
1315	15.3833	15.1666	19.8245	18.1995	12.6747	20.4745
1316	15.1666	15.1666	19.8245	18.8495	12.6747	20.4745
1317	15.1666	15.1666	19.8245	18.5245	12.6747	20.4745
1318	15.3833	15.5999	20.1495	18.8495	12.6747	20.4745
1319	15.3833	15.3833	19.8245	18.5245	12.6747	20.4745
1320	15.3833	15.3833	20.1495	18.5245	12.6747	20.4745
1321	15.3833	15.5999	20.1495	18.5245	12.6747	20.1495
1322	15.3833	15.3833	20.1495	18.8495	12.6747	20.1495
1323	15.1666	15.3833	19.4995	18.5245	12.6747	20.4745
1324	15.1666	15.5999	19.8245	18.8495	12.9997	20.4745
1325	15.3833	15.5999	20.1495	18.1995	12.6747	20.4745
1326	15.3833	15.3833	19.8245	18.8495	12.3497	20.4745
1327	15.1666	15.3833	20.1495	18.5245	12.6747	20.4745
1328	15.3833	15.5999	19.4995	18.1995	12.6747	20.1495
1329	15.3833	15.3833	19.8245	18.5245	12.6747	20.1495
1330	15.3833	15.5999	20.1495	18.5245	12.6747	20.4745
1331	15.3833	15.3833	19.8245	18.5245	12.6747	20.4745
1332	15.3833	15.5999	20.1495	18.8495	12.6747	20.4745
1333	15.1666	15.5999	19.8245	19.1745	12.6747	20.4745
1334	15.3833	15.5999	19.8245	18.5245	12.6747	20.4745
1335	15.1666	15.5999	19.8245	18.5245	12.6747	20.4745
1336	15.1666	15.5999	20.1495	18.8495	12.6747	20.4745
1337	15.1666	15.5999	19.8245	18.8495	12.6747	20.4745
1338	15.1666	15.5999	19.1745	18.5245	12.6747	20.4745
1339	15.3833	15.5999	20.1495	18.5245	12.6747	20.1495
1340	15.3833	15.5999	19.8245	18.5245	12.6747	20.4745
1341	15.1666	15.5999	19.8245	18.5245	12.9997	20.4745
1342	15.3833	15.5999	19.8245	18.5245	12.6747	20.4745
1343	15.5999	15.5999	19.4995	18.8495	12.6747	20.1495
1344	15.3833	15.3833	19.8245	18.8495	12.6747	20.4745
1345	15.1666	15.5999	19.1745	18.5245	12.6747	20.4745
1346	15.1666	15.3833	19.8245	18.5245	12.6747	20.4745
1347	15.3833	15.5999	19.4995	19.1745	12.6747	20.4745
1348	15.1666	15.3833	19.8245	18.5245	12.3497	20.1495
1349	15.3833	15.5999	19.4995	18.5245	12.6747	20.4745
1350	15.3833	15.5999	19.4995	19.8245	12.6747	20.4745
1351	15.5999	15.5999	19.1745	18.8495	12.6747	20.4745
1352	15.3833	15.5999	19.8245	18.5245	12.6747	20.1495
1353	15.3833	15.5999	19.4995	18.5245	12.6747	20.4745
1354	15.3833	15.5999	19.4995	18.5245	12.6747	20.1495
1355	15.3833	15.5999	19.4995	18.8495	12.3497	19.8245
1356	15.3833	15.5999	19.8245	18.5245	12.6747	20.1495
1357	15.3833	15.5999	19.8245	18.1995	12.6747	19.8245
1358	15.1666	15.5999	19.8245	18.5245	12.6747	20.1495
1359	15.5999	15.5999	19.4995	18.5245	12.6747	20.4745
1360	15.3833	15.5999	19.8245	18.5245	12.6747	20.1495
1361	15.1666	15.3833	19.8245	18.5245	12.3497	20.4745
1362	15.3833	15.3833	19.8245	18.5245	12.6747	20.4745
1363	15.3833	15.5999	19.1745	18.5245	12.6747	20.1495
1364	14.95	15.5999	19.8245	18.5245	12.6747	20.1495
1365	15.5999	15.5999	19.4995	18.1995	12.3497	20.1495
1366	15.3833	15.5999	19.4995	18.1995	12.9997	20.1495
1367	15.3833	15.3833	19.8245	18.5245	12.6747	20.1495
1368	15.3833	15.5999	19.4995	18.1995	12.6747	20.4745
1369	15.3833	15.5999	19.4995	18.5245	12.6747	20.1495
1370	15.1666	15.5999	19.4995	18.1995	12.6747	20.1495
1371	15.3833	15.5999	18.8495	18.5245	12.3497	20.4745
1372	15.3833	15.3833	19.8245	18.5245	12.6747	20.1495
1373	15.5999	15.5999	19.4995	18.1995	12.6747	20.1495
1374	15.3833	15.5999	19.8245	18.5245	12.9997	19.8245
1375	15.3833	15.3833	19.1745	18.8495	12.6747	20.1495
1376	15.1666	15.3833	19.1745	18.1995	12.9997	20.4745
1377	15.3833	15.5999	19.8245	18.8495	12.6747	20.1495
1378	15.3833	15.5999	19.8245	18.1995	12.6747	20.1495
1379	15.1666	15.5999	19.8245	18.5245	12.6747	19.8245
1380	15.3833	15.3833	19.4995	18.1995	12.6747	20.1495
1381	15.1666	15.5999	19.8245	18.5245	12.6747	20.1495
1382	15.3833	15.5999	19.4995	18.5245	12.6747	20.1495
1383	15.1666	15.3833	19.8245	18.1995	12.6747	20.1495
1384	15.5999	15.5999	19.4995	18.5245	12.9997	20.1495
1385	15.1666	15.5999	19.4995	18.5245	12.6747	20.4745
1386	15.3833	15.5999	19.8245	18.5245	12.6747	20.1495
1387	15.3833	15.5999	19.4995	18.5245	12.6747	20.1495
1388	15.1666	15.3833	19.4995	18.8495	12.6747	19.8245
1389	15.1666	15.5999	19.4995	18.1995	12.9997	20.1495
1390	15.3833	15.3833	19.8245	18.5245	12.9997	20.1495
1391	15.3833	15.3833	19.8245	18.1995	12.9997	20.4745
1392	15.3833	15.3833	19.4995	18.1995	12.6747	20.1495
1393	15.3833	15.3833	19.4995	18.1995	12.9997	20.4745
1394	15.5999	15.5999	19.8245	18.5245	12.9997	20.1495
1395	15.3833	15.3833	19.4995	18.5245	12.6747	20.1495
1396	15.3833	15.5999	19.1745	17.8746	12.6747	20.4745
1397	15.5999	15.3833	19.8245	18.5245	12.6747	20.1495
1398	15.5999	15.3833	19.4995	18.1995	12.6747	20.1495
1399	15.3833	15.5999	19.8245	18.1995	12.9997	20.4745
1400	15.3833	15.3833	19.8245	18.1995	12.6747	20.4745
1401	15.3833	15.5999	19.8245	18.5245	12.9997	20.1495
1402	15.5999	15.3833	19.4995	18.1995	12.6747	20.1495
1403	15.3833	15.5999	19.4995	18.1995	12.9997	20.1495
1404	15.3833	15.5999	19.4995	17.8746	12.6747	20.1495
1405	15.3833	15.3833	19.8245	18.5245	12.6747	20.4745
1406	15.5999	15.3833	19.8245	18.5245	12.6747	20.4745
1407	15.3833	15.3833	20.1495	18.1995	12.6747	20.4745
1408	15.3833	15.3833	19.4995	18.1995	12.9997	20.4745
1409	15.1666	15.5999	19.4995	18.1995	12.6747	20.1495
1410	15.3833	15.5999	19.8245	18.1995	12.6747	20.1495
1411	15.3833	15.3833	20.1495	17.5496	12.9997	20.4745
1412	15.1666	15.3833	19.8245	18.1995	12.9997	20.4745
1413	15.3833	15.5999	19.1745	18.1995	12.6747	20.4745
1414	15.1666	15.5999	19.8245	18.8495	12.6747	20.1495
1415	15.3833	15.1666	19.1745	18.1995	12.9997	19.8245
1416	15.5999	15.3833	19.8245	18.1995	12.6747	20.4745
1417	15.3833	15.5999	19.8245	18.1995	12.9997	20.4745
1418	15.5999	15.5999	19.8245	18.5245	12.9997	20.4745
1419	15.5999	15.3833	19.8245	18.5245	12.9997	20.1495
1420	15.3833	15.5999	19.4995	18.8495	12.9997	20.4745
1421	15.5999	15.3833	19.4995	18.1995	12.6747	20.4745
1422	15.3833	15.5999	19.8245	18.1995	12.9997	20.4745
1423	15.5999	15.5999	19.4995	18.5245	12.6747	20.1495
1424	15.3833	15.3833	19.4995	18.1995	12.9997	20.4745
1425	15.5999	15.3833	19.1745	17.5496	12.9997	20.1495
1426	15.5999	15.5999	20.1495	18.1995	12.6747	20.1495
1427	15.3833	15.3833	19.4995	18.1995	12.9997	20.1495
1428	15.3833	15.3833	19.4995	18.1995	12.9997	20.1495
1429	15.3833	15.3833	20.1495	18.5245	12.9997	20.1495
1430	15.3833	15.5999	19.8245	18.5245	12.9997	20.4745
1431	15.3833	15.3833	19.4995	18.5245	12.9997	20.1495
1432	15.5999	15.5999	20.1495	18.1995	12.9997	20.1495
1433	15.3833	15.3833	19.8245	17.8746	12.9997	20.1495
1434	15.3833	15.5999	19.8245	18.5245	12.9997	20.1495
1435	15.5999	15.3833	19.4995	18.1995	12.9997	20.1495
1436	15.3833	15.5999	19.8245	18.5245	13.3247	20.4745
1437	15.3833	15.3833	19.4995	18.5245	13.3247	20.4745
1438	15.3833	15.3833	19.4995	18.1995	12.9997	20.4745
1439	15.5999	15.5999	19.1745	18.5245	12.6747	20.4745
1440	15.5999	15.3833	19.1745	18.1995	12.9997	20.1495
1441	15.3833	15.3833	19.1745	18.1995	13.3247	20.4745
1442	15.3833	15.3833	19.1745	18.5245	12.6747	20.4745
1443	15.3833	15.5999	19.4995	18.5245	13.3247	20.1495
1444	15.3833	15.5999	19.4995	18.5245	12.9997	20.1495
1445	15.5999	15.3833	19.1745	18.1995	12.6747	20.4745
1446	15.5999	15.3833	19.4995	18.5245	12.6747	19.8245
1447	15.3833	15.3833	19.8245	18.1995	12.6747	20.4745
1448	15.3833	15.3833	19.4995	17.8746	13.3247	20.4745
1449	15.8166	15.5999	19.1745	18.1995	12.6747	20.4745
1450	15.3833	15.3833	19.4995	18.1995	12.6747	20.4745
1451	15.3833	15.5999	19.4995	18.5245	12.9997	19.8245
1452	15.3833	15.5999	19.4995	18.1995	12.9997	20.1495
1453	15.5999	15.5999	19.4995	18.1995	13.3247	20.4745
1454	15.5999	15.5999	19.4995	18.1995	13.3247	20.4745
1455	15.3833	15.5999	19.8245	18.1995	13.3247	20.4745
1456	15.3833	15.5999	19.8245	18.1995	12.9997	20.1495
1457	15.3833	15.3833	19.8245	18.5245	12.6747	19.8245
1458	15.3833	15.5999	19.8245	18.1995	12.6747	20.1495
1459	15.3833	15.5999	19.8245	18.1995	13.3247	20.1495
1460	15.3833	15.5999	19.4995	18.1995	12.3497	20.1495
1461	15.5999	15.3833	19.4995	18.1995	12.9997	20.1495
1462	15.5999	15.5999	19.8245	18.5245	12.6747	20.1495
1463	15.3833	15.3833	19.8245	18.5245	12.9997	20.1495
1464	15.3833	15.3833	19.8245	18.1995	13.3247	20.4745
1465	15.3833	15.3833	19.8245	18.1995	13.3247	20.1495
1466	15.1666	15.3833	19.8245	18.1995	12.9997	20.1495
1467	15.3833	15.3833	19.4995	18.1995	12.9997	20.1495
1468	15.3833	15.3833	19.4995	18.1995	12.9997	20.1495
1469	15.3833	15.3833	19.4995	18.5245	12.9997	20.1495
1470	15.3833	15.5999	19.8245	17.8746	13.3247	20.1495
1471	15.5999	15.3833	19.8245	18.1995	13.3247	20.1495
1472	15.3833	15.3833	19.8245	18.1995	13.3247	20.4745
1473	15.3833	15.5999	19.8245	18.1995	12.9997	20.1495
1474	15.5999	15.3833	19.8245	18.1995	12.9997	20.1495
1475	15.3833	15.3833	19.4995	18.1995	12.9997	20.1495
1476	15.3833	15.3833	19.4995	18.5245	13.3247	20.1495
1477	15.3833	15.5999	19.8245	18.1995	13.3247	20.1495
1478	15.3833	15.3833	19.8245	18.1995	13.3247	20.1495
1479	15.3833	15.3833	19.8245	18.5245	12.9997	20.1495
1480	15.3833	15.3833	19.8245	18.1995	13.3247	20.1495
1481	15.5999	15.3833	20.1495	18.1995	13.3247	20.1495
1482	15.5999	15.3833	19.8245	18.1995	12.9997	20.1495
1483	15.3833	15.3833	19.8245	18.5245	12.9997	20.1495
1484	15.3833	15.5999	19.8245	18.1995	12.9997	20.1495
1485	15.3833	15.3833	20.1495	17.8746	12.6747	20.1495
1486	15.5999	15.3833	19.8245	18.1995	12.9997	20.1495
1487	15.3833	15.3833	19.8245	18.1995	12.6747	20.1495
1488	15.5999	15.3833	19.8245	18.1995	12.6747	20.1495
1489	15.3833	15.3833	19.4995	18.5245	12.6747	20.1495
1490	15.3833	15.3833	19.8245	18.5245	12.6747	19.8245
1491	15.3833	15.3833	19.4995	18.1995	12.6747	20.1495
1492	15.3833	15.3833	19.8245	18.1995	12.6747	20.1495
1493	15.3833	15.3833	19.8245	18.5245	13.3247	20.1495
1494	15.3833	15.3833	19.8245	18.1995	12.9997	20.1495
1495	15.5999	15.5999	19.8245	17.8746	13.3247	20.1495
1496	15.5999	15.3833	19.4995	18.1995	13.3247	20.1495
1497	15.3833	15.3833	19.8245	18.1995	12.9997	20.1495
1498	15.3833	15.5999	19.8245	17.8746	12.6747	20.1495
1499	15.3833	15.3833	19.4995	18.1995	12.6747	20.1495
1500	15.1666	15.5999	19.8245	18.5245	13.3247	20.1495
1501	15.5999	15.3833	19.8245	18.1995	12.6747	20.1495
1502	15.5999	15.3833	20.1495	17.8746	12.6747	20.1495
1503	15.3833	15.3833	19.4995	18.1995	12.3497	20.1495
1504	15.3833	15.3833	19.8245	17.8746	12.3497	20.1495
1505	15.3833	15.3833	19.8245	18.1995	12.3497	20.1495
1506	15.5999	15.3833	19.4995	17.8746	13.3247	20.1495
1507	15.5999	15.1666	19.4995	18.5245	12.9997	20.1495
1508	15.3833	15.3833	19.4995	17.8746	12.9997	20.1495
1509	15.5999	15.3833	20.1495	18.1995	13.3247	20.1495
1510	15.3833	15.3833	19.8245	17.8746	13.3247	20.1495
1511	15.5999	15.5999	20.1495	18.5245	12.9997	20.1495
1512	15.8166	15.3833	19.8245	18.1995	12.6747	20.1495
1513	15.3833	15.3833	19.8245	18.1995	12.9997	20.1495
1514	15.8166	15.3833	19.8245	18.1995	12.9997	20.1495
1515	15.5999	15.3833	19.8245	18.5245	12.9997	20.1495
1516	15.8166	15.3833	20.1495	18.1995	12.9997	19.8245
1517	15.3833	15.3833	19.8245	18.1995	12.9997	20.1495
1518	15.3833	15.3833	20.1495	18.1995	12.9997	20.1495
1519	15.3833	15.3833	19.4995	18.5245	12.9997	20.1495
1520	15.5999	15.5999	19.4995	18.1995	12.9997	20.1495
1521	15.3833	15.5999	20.1495	18.1995	13.3247	19.8245
1522	15.3833	15.5999	19.8245	18.5245	12.9997	20.1495
1523	15.3833	15.3833	20.1495	18.5245	13.3247	20.1495
1524	15.3833	15.3833	20.1495	18.1995	12.9997	20.1495
1525	15.3833	15.3833	19.4995	18.5245	12.6747	20.1495
1526	15.3833	15.3833	20.1495	17.8746	12.9997	19.8245
1527	15.5999	15.3833	20.1495	18.1995	12.9997	20.1495
1528	15.3833	15.3833	19.8245	18.1995	12.9997	19.8245
1529	15.5999	15.5999	20.1495	18.1995	13.3247	19.8245
1530	15.5999	15.3833	19.8245	18.1995	12.9997	19.8245
1531	15.8166	15.3833	19.8245	18.1995	12.9997	19.8245
1532	15.5999	15.3833	20.1495	18.1995	12.9997	20.1495
1533	15.3833	15.3833	19.8245	18.1995	12.9997	19.8245
1534	15.8166	15.3833	20.1495	18.1995	12.9997	19.8245
1535	15.3833	15.3833	20.1495	18.1995	12.9997	19.8245
1536	15.8166	15.3833	20.1495	18.1995	12.9997	19.8245
1537	15.5999	15.3833	19.8245	18.1995	12.9997	20.1495
1538	15.5999	15.3833	19.8245	18.5245	13.6497	19.8245
1539	15.5999	15.3833	19.8245	18.5245	12.9997	19.8245
1540	15.5999	15.3833	20.1495	18.1995	12.9997	20.1495
1541	15.5999	15.3833	20.1495	18.5245	12.9997	19.8245
1542	15.8166	15.3833	19.8245	18.1995	13.3247	20.1495
1543	15.3833	15.3833	19.8245	18.1995	12.9997	19.8245
1544	15.5999	15.3833	20.1495	18.1995	12.9997	19.8245
1545	15.5999	15.3833	20.1495	18.1995	13.3247	19.8245
1546	15.8166	15.3833	20.1495	17.8746	13.3247	20.1495
1547	15.5999	15.1666	20.1495	17.8746	13.3247	19.8245
1548	15.5999	15.3833	19.8245	18.1995	13.3247	19.8245
1549	15.5999	15.3833	20.1495	18.1995	13.3247	20.1495
1550	15.5999	15.1666	19.8245	18.1995	13.3247	19.8245
1551	15.8166	15.3833	20.1495	18.5245	12.9997	20.1495
1552	15.5999	15.1666	19.4995	17.8746	12.9997	20.1495
1553	15.3833	15.1666	20.1495	17.8746	12.6747	19.8245
1554	15.5999	15.3833	19.8245	17.8746	12.9997	19.8245
1555	15.5999	15.3833	20.1495	18.1995	12.9997	19.8245
1556	15.5999	15.3833	20.1495	17.8746	13.3247	19.8245
1557	15.5999	15.1666	20.4745	18.1995	12.6747	19.8245
1558	15.5999	15.1666	20.4745	18.1995	12.6747	20.1495
1559	15.3833	15.3833	20.1495	17.8746	12.9997	19.8245
1560	15.5999	15.1666	19.4995	18.1995	12.9997	19.8245
1561	15.5999	15.3833	20.1495	18.5245	12.9997	20.1495
1562	15.5999	15.3833	19.4995	18.1995	12.9997	20.1495
1563	15.8166	15.3833	19.8245	17.8746	12.9997	19.8245
1564	15.8166	15.3833	20.4745	18.1995	12.9997	20.1495
1565	15.8166	15.3833	19.8245	17.8746	13.3247	20.1495
1566	15.5999	15.1666	19.4995	17.8746	12.9997	20.1495
1567	15.5999	15.3833	19.4995	18.1995	13.3247	19.8245
1568	15.5999	15.3833	20.1495	17.8746	13.3247	20.1495
1569	15.3833	15.3833	20.1495	18.5245	13.3247	20.1495
1570	15.8166	15.3833	20.1495	18.5245	12.9997	20.1495
1571	15.8166	15.3833	19.8245	18.1995	12.9997	20.1495
1572	15.5999	15.3833	19.8245	18.1995	12.6747	20.1495
1573	15.8166	15.3833	20.4745	18.1995	12.9997	20.1495
1574	15.8166	15.3833	20.1495	18.1995	12.6747	20.1495
1575	15.5999	15.3833	20.1495	18.1995	12.9997	20.1495
1576	15.5999	15.3833	19.8245	18.1995	12.9997	20.1495
1577	15.5999	15.3833	19.4995	17.8746	12.9997	20.1495
1578	15.5999	15.3833	19.8245	18.1995	12.9997	20.1495
1579	15.8166	15.3833	19.8245	17.8746	12.9997	20.1495
1580	15.5999	15.3833	20.1495	18.1995	12.6747	20.1495
1581	15.5999	15.3833	19.8245	18.1995	12.6747	20.1495
1582	15.5999	15.3833	19.8245	17.8746	12.9997	19.8245
1583	15.8166	15.3833	19.4995	18.1995	12.6747	20.1495
1584	15.8166	15.3833	20.1495	17.8746	12.6747	20.1495
1585	15.5999	15.3833	19.8245	17.8746	12.9997	20.1495
1586	15.5999	15.3833	19.8245	17.8746	12.9997	20.1495
1587	15.8166	15.3833	19.8245	18.1995	12.9997	20.1495
1588	15.5999	15.3833	19.8245	18.1995	12.9997	20.1495
1589	15.8166	15.3833	19.8245	18.1995	12.6747	20.1495
1590	15.5999	15.3833	20.1495	18.5245	13.3247	20.1495
1591	15.5999	15.3833	19.8245	17.8746	12.9997	20.1495
1592	15.5999	15.3833	20.1495	18.1995	12.9997	19.8245
1593	15.5999	15.3833	19.4995	18.1995	12.9997	20.1495
1594	15.5999	15.1666	19.8245	18.5245	12.9997	19.8245
1595	15.8166	15.3833	19.4995	17.8746	12.9997	19.8245
1596	15.5999	15.3833	20.1495	17.8746	12.9997	20.1495
1597	15.8166	15.1666	19.4995	18.1995	12.9997	19.8245
1598	15.8166	15.1666	19.8245	18.1995	12.9997	19.8245
1599	15.5999	15.1666	19.8245	17.8746	12.9997	19.8245
1600	15.8166	15.3833	19.8245	18.5245	12.9997	20.1495
1601	15.5999	15.3833	19.8245	17.8746	12.9997	20.1495
1602	15.5999	15.1666	19.1745	18.1995	12.9997	19.8245
1603	15.8166	15.1666	19.8245	18.1995	12.9997	19.8245
1604	15.8166	15.1666	19.4995	18.5245	12.9997	19.8245
1605	15.8166	15.3833	19.8245	18.1995	12.6747	20.1495
1606	15.8166	15.3833	20.1495	17.8746	12.9997	19.8245
1607	15.5999	15.3833	19.8245	17.8746	12.9997	19.8245
1608	15.5999	15.3833	20.1495	18.1995	12.9997	19.8245
1609	15.5999	15.3833	19.8245	18.1995	12.9997	20.1495
1610	15.8166	15.3833	19.8245	18.1995	12.9997	20.1495
1611	15.5999	15.1666	19.4995	18.5245	12.6747	20.1495
1612	15.5999	15.3833	19.4995	18.1995	13.3247	19.8245
1613	15.5999	15.3833	19.8245	18.1995	12.9997	19.8245
1614	15.5999	15.3833	19.8245	18.1995	12.9997	20.1495
1615	15.5999	15.3833	19.8245	18.5245	12.6747	20.1495
1616	15.8166	15.1666	19.4995	17.8746	12.9997	20.1495
1617	15.5999	15.3833	19.4995	18.1995	12.6747	19.8245
1618	15.8166	15.3833	19.8245	17.8746	12.6747	20.1495
1619	15.5999	15.3833	19.8245	18.1995	12.9997	19.8245
1620	15.5999	15.5999	19.4995	18.5245	12.9997	19.8245
1621	15.8166	15.1666	19.4995	18.1995	12.3497	20.1495
1622	15.5999	15.1666	20.1495	18.1995	12.6747	20.1495
1623	15.5999	15.3833	19.8245	18.5245	13.3247	20.1495
1624	15.5999	15.3833	20.1495	17.8746	12.9997	20.1495
1625	15.8166	15.3833	19.8245	17.8746	12.9997	20.1495
1626	15.5999	15.1666	19.8245	18.1995	12.9997	20.1495
1627	15.5999	15.5999	19.8245	18.1995	12.9997	20.1495
1628	15.5999	15.1666	19.8245	18.5245	12.9997	20.1495
1629	16.0333	15.3833	20.1495	18.5245	12.9997	20.1495
1630	15.8166	15.3833	19.4995	18.1995	12.9997	20.1495
1631	15.5999	15.3833	19.8245	17.8746	12.9997	20.1495
1632	15.8166	15.3833	20.1495	18.5245	12.6747	20.1495
1633	15.8166	15.3833	19.4995	18.1995	13.3247	19.8245
1634	15.8166	15.3833	20.1495	18.1995	12.9997	19.8245
1635	15.8166	15.1666	19.4995	17.8746	12.9997	20.1495
1636	15.5999	15.1666	19.4995	18.5245	12.9997	19.4995
1637	15.8166	15.3833	20.1495	18.5245	12.9997	20.1495
1638	15.5999	15.3833	19.4995	18.1995	12.6747	19.8245
1639	16.0333	15.3833	19.8245	18.1995	12.6747	20.1495
1640	15.5999	15.3833	19.8245	18.5245	12.9997	19.8245
1641	15.5999	15.1666	19.8245	18.8495	12.9997	19.8245
1642	15.5999	15.3833	19.8245	18.1995	12.9997	19.8245
1643	16.0333	15.3833	19.8245	17.8746	12.6747	19.8245
1644	15.8166	15.3833	19.8245	17.8746	12.6747	20.1495
1645	15.8166	15.3833	19.8245	18.1995	12.6747	19.8245
1646	15.5999	15.1666	19.4995	18.5245	12.6747	19.8245
1647	15.3833	15.3833	20.1495	18.1995	12.6747	19.8245
1648	15.8166	15.3833	20.1495	18.1995	12.6747	20.1495
1649	16.0333	15.3833	19.8245	18.1995	12.6747	20.1495
1650	15.5999	15.3833	19.4995	18.5245	12.6747	19.8245
1651	15.8166	15.1666	19.8245	18.1995	12.6747	19.8245
1652	16.0333	15.1666	19.4995	17.8746	12.6747	19.8245
1653	15.8166	15.3833	19.8245	18.1995	12.6747	19.8245
1654	15.8166	15.1666	19.8245	18.5245	12.6747	20.1495
1655	15.5999	15.3833	20.1495	18.1995	12.9997	19.8245
1656	15.8166	15.1666	19.8245	18.1995	12.6747	20.1495
1657	15.8166	15.3833	19.8245	17.8746	12.6747	20.1495
1658	15.8166	15.3833	19.8245	18.1995	12.6747	20.1495
1659	15.5999	15.1666	19.4995	17.8746	12.6747	20.1495
1660	15.8166	15.3833	19.4995	18.5245	12.6747	20.1495
1661	15.5999	15.3833	19.8245	18.5245	12.6747	19.8245
1662	15.5999	15.3833	19.8245	18.5245	12.9997	19.8245
1663	16.0333	15.3833	19.4995	17.8746	12.6747	20.1495
1664	15.8166	15.1666	20.1495	18.5245	12.9997	20.1495
1665	15.8166	15.1666	19.8245	18.1995	12.9997	20.1495
1666	15.5999	15.1666	19.8245	18.1995	13.3247	20.1495
1667	15.8166	15.1666	19.4995	18.5245	12.9997	20.1495
1668	15.5999	15.3833	20.1495	17.8746	12.9997	20.1495
1669	15.5999	15.1666	20.1495	18.1995	12.9997	19.8245
1670	15.8166	15.3833	20.1495	18.1995	12.9997	20.1495
1671	15.5999	15.1666	20.1495	17.8746	12.9997	20.1495
1672	15.5999	15.3833	19.8245	17.8746	12.9997	20.1495
1673	15.8166	15.1666	19.4995	17.8746	12.9997	20.1495
1674	15.5999	15.3833	19.4995	18.5245	12.9997	20.1495
1675	15.8166	15.3833	19.8245	18.5245	12.6747	20.1495
1676	15.8166	15.3833	19.1745	18.1995	12.9997	20.1495
1677	15.8166	15.1666	19.4995	18.5245	12.9997	20.1495
1678	15.5999	15.1666	19.8245	18.1995	12.6747	20.1495
1679	15.5999	15.1666	19.8245	18.1995	12.6747	20.1495
1680	15.5999	15.1666	19.4995	18.1995	12.6747	20.4745
1681	15.5999	15.1666	19.8245	17.5496	12.6747	20.1495
1682	15.5999	14.95	19.8245	18.5245	12.6747	20.4745
1683	15.8166	15.1666	19.1745	17.8746	12.6747	20.1495
1684	16.0333	15.3833	19.4995	18.1995	12.9997	20.4745
1685	15.8166	15.3833	19.4995	18.1995	12.6747	20.1495
1686	15.8166	15.3833	19.4995	18.5245	12.9997	20.4745
1687	15.8166	15.3833	19.8245	18.1995	12.9997	20.1495
1688	15.8166	15.1666	20.1495	18.5245	12.9997	20.4745
1689	16.0333	15.1666	19.4995	18.1995	13.3247	20.1495
1690	15.8166	15.1666	19.1745	18.1995	12.6747	20.4745
1691	15.8166	15.1666	19.1745	17.8746	12.6747	20.1495
1692	15.8166	15.1666	19.4995	18.1995	13.3247	20.1495
1693	15.8166	15.3833	19.8245	18.1995	12.9997	20.1495
1694	15.8166	15.1666	19.8245	18.5245	12.9997	20.4745
1695	15.5999	15.3833	19.8245	18.5245	12.9997	20.4745
1696	16.0333	15.1666	19.4995	17.5496	12.9997	20.1495
1697	15.8166	15.1666	19.4995	17.8746	12.9997	20.7995
1698	15.8166	15.1666	19.4995	18.8495	12.9997	20.1495
1699	15.5999	15.1666	19.8245	18.8495	12.6747	20.4745
1700	15.5999	15.1666	20.1495	18.5245	12.9997	20.1495
1701	15.5999	15.1666	19.8245	18.1995	12.6747	20.4745
1702	15.5999	14.95	19.8245	18.1995	12.6747	20.1495
1703	15.5999	15.3833	20.1495	18.5245	12.6747	20.1495
1704	15.5999	14.95	19.4995	18.1995	12.9997	20.4745
1705	16.0333	15.3833	20.1495	17.8746	12.9997	20.1495
1706	15.8166	15.1666	19.8245	17.8746	12.6747	20.7995
1707	15.8166	15.1666	19.8245	18.1995	12.6747	20.4745
1708	15.5999	14.95	19.8245	18.1995	12.6747	20.4745
1709	15.8166	15.3833	19.8245	17.8746	12.6747	20.1495
1710	15.5999	14.95	19.8245	18.1995	12.6747	20.4745
1711	15.5999	14.95	19.8245	18.8495	12.6747	20.4745
1712	16.0333	15.1666	20.1495	17.8746	12.6747	20.1495
1713	15.5999	15.3833	19.8245	18.1995	12.6747	20.1495
1714	15.5999	15.3833	19.8245	18.1995	12.6747	20.1495
1715	16.0333	15.3833	20.1495	18.1995	12.6747	20.4745
1716	16.0333	15.3833	19.4995	18.1995	12.6747	20.1495
1717	15.5999	15.1666	19.8245	18.5245	12.6747	20.4745
1718	16.0333	15.1666	19.4995	18.5245	12.9997	20.1495
1719	15.5999	15.1666	19.8245	18.8495	12.6747	20.4745
1720	15.8166	15.3833	19.4995	18.5245	12.6747	20.1495
1721	15.8166	15.1666	20.1495	18.8495	12.9997	20.1495
1722	15.8166	15.1666	20.1495	18.1995	12.6747	20.4745
1723	15.5999	15.1666	19.8245	18.1995	12.6747	20.7995
1724	15.8166	15.3833	19.8245	18.1995	13.3247	20.1495
1725	15.5999	15.3833	20.1495	18.1995	12.6747	20.1495
1726	15.8166	15.3833	19.4995	18.1995	12.6747	20.4745
1727	16.0333	15.3833	19.8245	18.1995	12.9997	20.4745
1728	15.8166	15.1666	19.4995	18.1995	12.9997	20.4745
1729	15.8166	15.1666	20.1495	17.8746	13.3247	20.4745
1730	15.5999	15.1666	20.1495	17.8746	12.9997	20.7995
1731	15.5999	15.1666	20.1495	18.1995	12.6747	20.1495
1732	16.0333	15.1666	19.4995	18.1995	12.9997	20.4745
1733	16.0333	15.3833	20.1495	18.8495	12.9997	20.4745
1734	15.8166	15.3833	20.1495	18.1995	12.9997	20.4745
1735	15.8166	15.1666	19.4995	18.1995	13.3247	20.1495
1736	15.8166	15.3833	19.8245	18.1995	12.9997	20.4745
1737	15.8166	15.1666	20.1495	18.1995	12.9997	20.1495
1738	15.5999	15.3833	19.8245	18.5245	12.9997	20.4745
1739	15.5999	15.3833	20.1495	18.5245	12.9997	20.1495
1740	15.5999	15.3833	19.4995	18.5245	12.9997	20.4745
1741	16.0333	15.3833	19.4995	17.8746	13.3247	20.1495
1742	15.8166	15.1666	19.8245	18.5245	12.6747	20.4745
1743	16.0333	15.1666	19.8245	17.8746	12.9997	20.1495
1744	16.0333	15.3833	19.4995	18.1995	12.6747	20.1495
1745	16.0333	15.1666	19.4995	17.8746	12.9997	20.4745
1746	15.8166	15.1666	19.8245	18.1995	12.9997	20.4745
1747	16.0333	15.3833	19.8245	18.1995	12.6747	20.1495
1748	16.0333	15.1666	20.1495	18.5245	12.9997	20.1495
1749	16.0333	15.1666	20.1495	18.1995	12.6747	20.4745
1750	15.5999	15.1666	19.8245	18.5245	12.9997	20.4745
1751	15.5999	15.1666	20.1495	18.5245	12.9997	20.4745
1752	15.8166	15.3833	20.1495	17.8746	12.6747	20.1495
1753	15.8166	15.3833	20.1495	18.1995	12.9997	20.1495
1754	16.0333	15.1666	20.1495	18.1995	12.9997	20.4745
1755	15.5999	15.3833	19.8245	18.5245	12.9997	20.1495
1756	15.5999	15.3833	20.1495	17.8746	12.9997	20.4745
1757	15.5999	15.1666	20.1495	18.1995	13.3247	20.4745
1758	15.5999	15.3833	20.1495	18.1995	13.3247	20.4745
1759	16.0333	15.1666	19.8245	18.5245	13.6497	20.4745
1760	15.5999	15.1666	19.8245	18.1995	13.3247	20.4745
1761	15.5999	15.1666	19.8245	18.8495	12.9997	20.1495
1762	15.8166	15.3833	19.8245	17.8746	12.9997	20.7995
1763	15.5999	15.1666	20.4745	18.1995	12.9997	20.1495
1764	15.8166	15.1666	20.1495	17.8746	12.9997	20.7995
1765	15.8166	15.3833	19.4995	18.5245	12.9997	20.4745
1766	15.8166	15.1666	19.8245	17.8746	13.3247	20.4745
1767	16.0333	15.3833	19.8245	18.5245	12.9997	20.4745
1768	15.8166	15.5999	20.1495	18.5245	13.3247	20.1495
1769	16.0333	15.1666	20.1495	18.1995	13.3247	20.4745
1770	15.8166	15.3833	19.8245	18.8495	13.3247	20.1495
1771	15.5999	15.3833	19.8245	18.1995	12.6747	20.4745
1772	15.8166	15.3833	19.8245	17.8746	12.9997	20.1495
1773	16.0333	15.5999	20.1495	18.1995	12.6747	20.4745
1774	15.5999	15.3833	20.1495	18.1995	13.3247	20.1495
1775	15.5999	14.95	20.1495	18.1995	13.3247	20.7995
1776	15.8166	15.3833	20.1495	18.5245	12.9997	20.1495
1777	16.0333	15.3833	20.1495	17.8746	13.3247	20.4745
1778	16.0333	15.3833	19.8245	18.5245	12.9997	20.1495
1779	16.0333	15.1666	20.1495	18.1995	13.3247	20.4745
1780	16.0333	15.3833	20.1495	18.1995	12.9997	20.4745
1781	15.8166	15.3833	19.8245	17.5496	12.9997	20.4745
1782	16.0333	15.3833	20.1495	18.1995	13.3247	20.4745
1783	15.8166	15.3833	19.8245	18.1995	13.3247	20.4745
1784	15.5999	15.1666	19.4995	17.8746	13.3247	20.7995
1785	15.8166	15.3833	19.8245	18.5245	13.3247	20.4745
1786	15.8166	15.1666	20.1495	18.5245	13.3247	20.1495
1787	15.8166	15.3833	20.1495	17.8746	13.3247	20.4745
1788	15.8166	15.3833	19.8245	17.8746	13.3247	20.1495
1789	15.5999	15.3833	19.8245	18.5245	13.3247	20.4745
1790	16.0333	15.3833	19.4995	18.1995	12.9997	20.7995
1791	16.0333	15.3833	19.8245	18.1995	13.3247	20.4745
1792	15.8166	15.5999	19.4995	18.1995	13.3247	20.7995
1793			20.1495	18.1995	13.6497	20.1495
1794			19.8245	18.5245	13.3247	20.7995
1795			19.8245	17.8746	12.9997	20.4745
1796			19.8245	17.8746	13.3247	20.4745
1797			19.8245	18.1995	13.3247	20.1495
1798			20.1495	17.5496	13.3247	20.7995
1799			19.8245	18.1995	12.9997	20.4745
	BGBV-074_0000	BGBV-083_0000	BGBV-266_0001	BGBV-267_0001	BGBV-270_0001	BGBV-271_0001
Pulse	10s;20hz;5ms	10s;20hz;5ms	10s;20hz;5ms	10s;20hz;5ms	10s;20hz;5ms	10s;20hz;5ms
LED	0.2	0.2	0.1	0.1	0.1	0.1
Layer
Max significant consecutive (ctrl)
Min (ctrl)	13.8666	15.3833	19.1745	18.5245	11.3747	18.5245
Max (ctrl)	14.5166	15.8166	20.1495	19.1745	12.3497	19.1745
Mean (ctrl)	14.1112	15.586	19.8664	18.9963	11.9618	18.8915
sd (ctrl)	0.155657	0.0958484	0.248102	0.184583	0.212605	0.162321
1.960*sd	0.305089	0.187863	0.48628	0.361783	0.416705	0.318149
2.576*sd	0.400973	0.246905	0.639111	0.475486	0.547669	0.418139
t0 (Opto)
CV	0.0110307	0.00614966	0.0124885	0.00971679	0.0177736	0.0085923
Magnitude (4 pt)
Onset (5 pt)
Magnitude (5 pt)
Onset (6 pt)
Magnitude (6 pt)
Initial contaction (4pt)
Initial contaction (5pt)
Initial contaction (6pt)
Dilation (4pt)
Max-contraction	13.65	14.95	18.8495	17.5496	11.3747	18.5245
t Max-Dil
DContraction	0.461289	0.636019	1.01691	1.44674	0.587082	0.366926
AUC 0-2
AUC 2-4
AUC 4-6
AUC 6-8
AUC 8-10
Contraction K+	/	5.956
Sexe	Femelle	Mâle	Mâle	Mâle
Age	20	17	18	19

## Sheet: AntagoGlu
Stimulation
Time	BGBV-421_0001	BGBV-424_0001	BGBV-425_0001	BGBV-426_0001	BGBV-427_0001	BGBV-438_0001	BGBV-439_0001	BGBV-440_0001	BGBV-441_0001	BGBV-442_0001
0	27.9493	19.1745	28.9243	23.3994	19.4995	23.7244	13.6497	21.4495	24.3744	12.6747
1	27.2993	19.1745	28.5993	23.3994	19.1745	23.7244	13.9747	21.7745	24.0494	13.3247
2	27.9493	18.8495	28.5993	23.0744	19.4995	23.7244	14.2996	21.4495	24.3744	13.6497
3	28.2743	18.8495	28.5993	23.3994	19.4995	23.3994	13.9747	21.4495	24.3744	13.9747
4	27.6243	19.4995	28.9243	23.7244	19.1745	23.3994	13.9747	21.4495	24.3744	13.6497
5	27.9493	19.1745	28.5993	23.0744	19.4995	23.3994	13.9747	21.7745	24.3744	12.9997
6	27.2993	19.1745	29.2493	23.3994	19.1745	23.3994	13.9747	22.0994	24.3744	12.9997
7	27.2993	19.1745	28.9243	23.3994	19.1745	23.3994	13.9747	22.0994	23.7244	13.3247
8	27.9493	19.4995	29.2493	23.3994	19.1745	23.7244	13.9747	21.4495	24.0494	13.3247
9	27.6243	19.1745	28.5993	23.7244	19.1745	23.3994	13.9747	21.1245	24.3744	13.6497
10	27.9493	18.5245	28.9243	23.0744	19.1745	23.7244	13.6497	21.4495	23.7244	12.9997
11	27.9493	19.1745	28.9243	23.7244	19.1745	23.0744	13.6497	21.7745	24.6994	13.6497
12	27.6243	19.1745	28.9243	22.4244	19.1745	23.7244	13.9747	21.4495	24.0494	13.3247
13	27.6243	19.4995	29.2493	22.7494	19.4995	24.3744	13.6497	21.7745	24.3744	12.9997
14	27.2993	18.8495	28.9243	23.7244	19.4995	23.7244	13.6497	21.7745	24.3744	13.6497
15	27.9493	19.1745	28.9243	23.3994	19.1745	23.7244	13.9747	21.7745	24.3744	13.3247
16	27.9493	19.4995	28.9243	23.3994	19.4995	23.7244	13.6497	21.1245	24.3744	12.6747
17	27.2993	18.5245	28.5993	23.0744	19.4995	24.0494	13.6497	21.1245	24.0494	13.3247
18	27.6243	19.4995	28.9243	23.3994	19.1745	24.0494	13.9747	20.7995	24.3744	12.9997
19	27.9493	19.1745	28.5993	23.3994	19.1745	23.7244	13.9747	21.1245	24.6994	13.3247
20	27.2993	19.1745	28.5993	23.0744	19.4995	23.7244	13.9747	21.7745	24.3744	12.9997
21	27.2993	18.5245	28.9243	23.3994	19.1745	23.3994	13.9747	21.7745	24.3744	13.6497
22	27.2993	19.1745	28.9243	23.3994	19.1745	23.7244	13.6497	21.7745	24.0494	12.9997
23	26.9743	19.4995	28.9243	23.7244	19.1745	23.7244	13.6497	21.4495	24.0494	12.9997
24	26.9743	18.8495	28.5993	23.3994	19.1745	23.7244	13.6497	21.1245	24.6994	13.6497
25	27.9493	18.8495	28.9243	23.7244	19.4995	24.0494	13.9747	21.1245	24.6994	13.3247
26	27.2993	18.5245	28.2743	23.7244	19.1745	23.7244	13.6497	21.1245	24.3744	13.3247
27	27.2993	19.1745	28.9243	23.3994	19.4995	23.3994	13.9747	20.4745	24.0494	12.6747
28	27.9493	19.4995	28.5993	23.0744	19.4995	23.3994	13.6497	21.1245	24.0494	13.3247
29	27.9493	19.1745	28.9243	23.0744	19.1745	23.7244	13.6497	21.1245	24.0494	12.9997
30	27.9493	19.1745	28.5993	23.3994	19.1745	23.3994	13.6497	21.4495	24.6994	13.3247
31	27.6243	19.1745	28.9243	23.7244	19.1745	23.3994	13.9747	21.4495	24.0494	13.3247
32	27.9493	19.1745	28.9243	23.3994	19.1745	23.7244	13.9747	21.1245	24.3744	13.3247
33	27.6243	19.1745	28.9243	23.3994	19.1745	24.0494	13.9747	21.7745	23.7244	12.9997
34	27.2993	18.8495	28.9243	23.0744	19.1745	23.7244	13.9747	21.4495	24.3744	13.3247
35	28.2743	19.4995	28.9243	23.3994	19.4995	23.7244	13.9747	20.7995	24.3744	12.9997
36	27.2993	19.1745	28.5993	23.0744	19.1745	23.7244	14.2996	21.4495	24.6994	12.9997
37	27.9493	19.1745	28.9243	23.3994	19.4995	23.7244	13.9747	21.1245	24.3744	13.3247
38	27.6243	19.1745	28.5993	23.0744	19.1745	24.0494	13.9747	21.7745	24.3744	12.6747
39	28.2743	18.1995	28.5993	23.0744	19.4995	23.7244	14.2996	21.4495	24.3744	12.9997
40	27.2993	18.8495	28.9243	23.3994	19.1745	23.3994	13.9747	21.4495	24.3744	13.3247
41	27.2993	18.5245	28.9243	23.3994	19.4995	23.7244	13.6497	21.4495	24.6994	12.9997
42	27.9493	19.1745	28.5993	23.7244	19.1745	23.7244	14.2996	21.1245	24.3744	13.3247
43	27.9493	18.5245	28.5993	23.7244	19.1745	23.3994	13.9747	21.4495	24.6994	13.3247
44	27.2993	19.1745	28.9243	23.3994	19.1745	23.7244	13.9747	21.7745	24.3744	13.3247
45	27.6243	18.8495	28.5993	23.3994	19.1745	23.3994	13.9747	21.1245	24.6994	13.3247
46	27.6243	19.4995	28.9243	22.7494	19.4995	23.3994	13.9747	21.4495	24.6994	12.9997
47	27.6243	18.1995	28.9243	23.0744	19.1745	23.7244	13.9747	21.1245	24.3744	13.3247
48	27.9493	18.5245	28.9243	23.7244	19.1745	23.7244	13.6497	21.4495	24.0494	13.3247
49	27.6243	18.8495	28.9243	23.3994	19.4995	23.7244	13.6497	21.4495	24.3744	12.9997
50	28.2743	18.8495	28.9243	23.7244	19.1745	24.0494	13.9747	21.7745	24.6994	12.9997
51	27.9493	18.5245	28.9243	23.3994	19.1745	23.3994	14.2996	21.7745	24.6994	12.9997
52	27.9493	19.1745	28.9243	23.0744	19.1745	23.7244	14.2996	21.7745	24.6994	13.6497
53	28.2743	18.8495	28.9243	23.3994	19.1745	23.7244	13.9747	21.7745	24.0494	13.3247
54	27.9493	18.5245	28.5993	23.0744	19.1745	23.3994	14.2996	21.7745	23.7244	13.3247
55	27.6243	18.8495	28.9243	23.3994	19.4995	23.3994	13.6497	21.7745	24.3744	13.3247
56	27.6243	18.8495	28.9243	23.0744	19.1745	23.7244	13.6497	21.4495	24.3744	12.9997
57	27.9493	19.1745	28.5993	23.7244	19.4995	23.3994	13.6497	21.4495	24.6994	13.3247
58	27.9493	19.1745	28.5993	23.7244	19.1745	23.7244	13.9747	21.1245	23.7244	13.6497
59	27.9493	18.8495	28.5993	23.3994	19.4995	23.7244	13.9747	21.1245	24.3744	12.9997
60	27.2993	18.1995	28.5993	23.0744	19.1745	23.7244	13.9747	20.7995	24.0494	13.3247
61	27.9493	18.5245	28.9243	23.7244	19.1745	23.3994	13.3247	20.7995	24.0494	12.6747
62	28.2743	18.1995	28.5993	23.3994	19.1745	23.3994	14.2996	20.7995	24.0494	12.9997
63	26.9743	18.5245	28.5993	23.7244	19.4995	23.7244	13.6497	21.1245	24.0494	12.9997
64	27.9493	17.8746	28.5993	23.3994	19.4995	23.7244	13.9747	21.1245	24.0494	12.9997
65	28.2743	18.1995	28.2743	23.0744	19.1745	23.7244	13.9747	21.1245	23.7244	13.3247
66	27.6243	18.8495	28.5993	24.0494	19.1745	23.7244	13.6497	21.1245	24.0494	12.9997
67	27.2993	17.8746	28.9243	23.7244	19.1745	23.7244	13.9747	20.7995	24.6994	12.9997
68	27.2993	18.5245	28.5993	23.7244	19.1745	24.0494	13.9747	21.1245	24.0494	12.9997
69	27.9493	18.8495	28.5993	24.0494	19.1745	23.7244	14.2996	21.1245	24.3744	13.3247
70	27.2993	18.1995	28.5993	23.7244	19.1745	23.7244	13.6497	20.7995	24.0494	13.3247
71	27.9493	18.8495	28.5993	24.0494	19.1745	24.0494	14.2996	21.1245	24.0494	12.9997
72	27.2993	18.5245	28.5993	23.3994	19.1745	23.3994	13.9747	21.1245	24.3744	12.9997
73	26.9743	18.5245	28.5993	23.7244	19.1745	23.7244	13.9747	20.7995	24.0494	12.9997
74	28.5993	18.1995	28.2743	23.3994	19.1745	23.7244	13.9747	21.1245	24.3744	13.3247
75	27.9493	18.8495	28.5993	23.7244	19.1745	24.0494	13.6497	20.7995	24.3744	12.9997
76	27.2993	18.5245	28.2743	23.7244	19.1745	23.3994	13.6497	21.1245	24.0494	13.3247
77	27.6243	18.5245	28.2743	23.7244	19.1745	23.3994	13.6497	20.7995	22.7494	12.9997
78	27.6243	18.5245	28.2743	23.7244	19.1745	23.7244	13.6497	21.1245	23.0744	12.9997
79	27.6243	18.1995	28.9243	23.7244	19.1745	24.0494	13.3247	20.7995	23.0744	12.9997
80	26.9743	18.5245	28.2743	23.7244	19.1745	23.3994	13.6497	21.4495	21.7745	12.9997
81	27.2993	18.1995	28.2743	23.7244	19.1745	23.7244	13.6497	21.1245	23.3994	13.6497
82	27.6243	18.1995	28.5993	24.0494	19.1745	23.7244	13.6497	21.1245	22.7494	13.3247
83	28.2743	17.5496	28.2743	23.7244	19.1745	23.7244	13.6497	21.1245	22.7494	13.3247
84	27.6243	17.8746	27.9493	24.0494	19.1745	24.0494	13.6497	21.4495	22.4244	12.9997
85	27.6243	17.5496	28.5993	24.0494	19.1745	23.7244	13.6497	21.4495	23.3994	12.9997
86	27.2993	17.5496	28.2743	24.6994	19.1745	23.7244	13.6497	21.1245	23.3994	13.3247
87	27.6243	17.8746	28.5993	24.0494	19.1745	23.7244	13.9747	21.4495	23.0744	12.9997
88	27.6243	17.8746	28.2743	24.3744	19.1745	23.3994	13.3247	21.7745	23.3994	13.3247
89	27.2993	17.5496	28.2743	24.3744	19.1745	23.0744	13.3247	22.0994	23.0744	13.3247
90	27.2993	18.1995	27.9493	24.3744	19.1745	23.3994	13.6497	21.7745	22.7494	13.3247
91	26.6493	18.1995	28.5993	24.3744	19.1745	23.3994	13.3247	21.7745	22.4244	13.6497
92	27.2993	17.8746	28.2743	24.0494	19.1745	23.7244	13.6497	21.7745	22.4244	13.3247
93	28.5993	17.2246	28.2743	24.3744	19.1745	23.7244	13.6497	21.4495	22.0994	13.3247
94	27.6243	16.5746	27.9493	24.0494	19.1745	24.0494	13.6497	21.4495	22.4244	13.3247
95	27.9493	17.2246	28.2743	24.3744	19.1745	23.7244	13.6497	21.7745	22.0994	13.3247
96	27.6243	17.5496	27.9493	24.3744	19.1745	23.7244	13.6497	21.7745	22.7494	13.3247
97	27.2993	16.5746	27.9493	23.7244	19.1745	23.3994	13.6497	22.0994	22.7494	13.3247
98	27.6243	17.2246	27.9493	24.0494	19.1745	23.7244	13.6497	21.1245	22.7494	13.3247
99	28.2743	16.8996	27.9493	24.3744	19.1745	23.3994	13.3247	21.4495	22.7494	13.3247
100	27.2993	17.2246	27.9493	24.3744	19.1745	23.7244	13.6497	21.4495	21.7745	13.3247
101	27.2993	16.8996	27.9493	24.3744	19.1745	23.7244	13.3247	21.4495	22.7494	12.9997
102	28.2743	17.2246	27.9493	24.3744	19.1745	23.7244	13.3247	21.7745	22.4244	12.6747
103	27.2993	17.5496	27.6243	24.3744	19.1745	24.0494	13.6497	21.4495	22.4244	13.6497
104	26.9743	16.8996	27.9493	24.3744	19.1745	23.7244	13.6497	21.1245	22.0994	13.3247
105	27.9493	17.5496	27.9493	24.3744	19.1745	23.3994	13.3247	21.4495	21.7745	13.3247
106	26.6493	16.8996	27.9493	24.3744	19.1745	23.7244	13.6497	21.4495	22.4244	13.6497
107	27.6243	16.5746	27.9493	24.3744	19.1745	23.7244	13.3247	21.7745	22.0994	13.3247
108	27.2993	16.8996	27.9493	24.3744	19.4995	23.7244	13.9747	21.4495	22.0994	12.9997
109	26.9743	17.2246	27.9493	24.3744	19.1745	23.3994	13.9747	21.4495	22.4244	12.9997
110	26.9743	16.5746	27.6243	24.0494	19.1745	23.7244	13.6497	21.7745	21.4495	13.6497
111	26.9743	17.5496	27.9493	24.3744	19.1745	23.7244	13.9747	21.7745	22.0994	13.3247
112	27.6243	17.5496	28.2743	24.6994	19.1745	23.7244	13.6497	21.1245	22.4244	12.9997
113	27.6243	18.5245	27.9493	24.6994	19.1745	23.7244	13.6497	21.4495	22.0994	13.3247
114	27.6243	18.1995	27.6243	24.3744	19.4995	23.3994	13.6497	21.4495	21.4495	13.3247
115	26.6493	18.1995	27.6243	24.0494	19.1745	23.7244	13.6497	22.0994	22.0994	13.3247
116	27.2993	17.8746	27.9493	24.3744	19.1745	23.7244	13.9747	21.4495	22.7494	13.6497
117	27.2993	17.8746	27.9493	24.3744	19.1745	23.7244	13.9747	21.7745	22.4244	13.3247
118	26.6493	17.8746	27.6243	24.3744	19.1745	23.3994	13.6497	22.4244	22.4244	13.3247
119	27.6243	17.8746	27.9493	24.3744	18.8495	23.7244	13.6497	21.7745	21.7745	13.3247
120	27.6243	18.5245	27.6243	24.3744	19.4995	23.3994	13.6497	20.7995	22.0994	13.3247
121	26.9743	17.8746	27.6243	24.0494	19.1745	23.7244	13.6497	21.4495	22.0994	13.6497
122	26.3243	17.8746	27.9493	24.0494	19.1745	23.3994	13.6497	21.7745	21.7745	13.6497
123	26.9743	18.1995	27.9493	24.0494	19.1745	23.3994	13.6497	21.4495	21.7745	13.3247
124	26.3243	18.1995	27.6243	24.6994	19.1745	23.3994	13.9747	21.4495	22.4244	13.3247
125	26.6493	17.8746	27.9493	24.6994	19.1745	23.7244	13.6497	22.0994	21.4495	13.3247
126	26.9743	18.1995	27.6243	24.3744	19.1745	23.3994	13.9747	21.7745	21.4495	13.3247
127	26.9743	18.1995	27.9493	23.7244	19.1745	23.7244	13.6497	21.4495	21.7745	12.9997
128	26.3243	18.5245	27.6243	24.3744	19.1745	23.3994	13.9747	21.4495	21.4495	13.6497
129	26.6493	17.8746	27.6243	24.6994	19.1745	23.3994	13.6497	21.7745	22.0994	13.6497
130	26.6493	18.1995	27.2993	24.3744	19.1745	23.3994	13.9747	21.1245	21.7745	12.9997
131	26.3243	18.1995	27.6243	24.3744	19.1745	23.7244	13.9747	21.1245	21.7745	13.3247
132	25.9994	17.5496	27.6243	24.0494	19.1745	23.3994	13.9747	21.7745	21.7745	13.6497
133	26.6493	17.8746	27.9493	25.0244	19.1745	23.3994	13.6497	21.4495	21.7745	13.3247
134	26.3243	17.8746	27.6243	24.3744	19.1745	23.7244	13.6497	21.4495	21.7745	13.3247
135	26.6493	18.1995	27.2993	24.0494	19.1745	23.7244	13.6497	21.4495	22.0994	13.3247
136	26.3243	18.5245	27.9493	24.0494	19.4995	24.0494	13.6497	21.7745	21.4495	13.3247
137	26.6493	17.5496	27.2993	24.3744	18.8495	23.3994	13.6497	21.7745	22.0994	13.6497
138	26.6493	18.1995	27.6243	24.0494	19.4995	23.7244	13.6497	21.7745	21.4495	13.3247
139	26.3243	17.8746	27.6243	24.0494	19.1745	23.7244	13.9747	21.1245	21.4495	12.9997
140	25.9994	18.1995	27.6243	24.3744	19.1745	23.3994	13.9747	21.1245	21.7745	12.9997
141	25.9994	18.1995	27.9493	24.0494	19.1745	23.3994	13.9747	21.7745	21.7745	12.9997
142	26.3243	17.8746	27.6243	24.0494	19.1745	23.7244	13.9747	21.4495	21.4495	12.9997
143	26.9743	17.8746	27.6243	24.3744	19.1745	23.7244	13.6497	21.4495	21.7745	12.9997
144	26.3243	18.5245	27.9493	24.0494	19.1745	23.7244	13.6497	21.1245	21.7745	13.3247
145	25.9994	17.8746	27.9493	24.6994	18.8495	23.7244	13.6497	21.4495	21.7745	12.9997
146	26.9743	17.8746	27.6243	23.7244	18.8495	23.7244	13.9747	21.4495	22.4244	12.9997
147	26.3243	18.1995	27.9493	24.0494	19.1745	23.7244	13.6497	21.4495	21.4495	13.3247
148	25.9994	17.8746	27.6243	24.0494	19.1745	23.3994	13.6497	21.4495	22.0994	12.9997
149	26.3243	17.8746	27.9493	24.3744	19.1745	24.0494	13.9747	21.4495	21.7745	13.3247
150	25.9994	18.1995	27.9493	24.0494	18.8495	23.7244	13.6497	20.4745	21.4495	12.6747
151	26.3243	17.8746	27.6243	24.3744	19.1745	23.7244	13.6497	21.1245	22.0994	12.6747
152	26.6493	17.8746	27.2993	24.6994	19.1745	23.7244	13.6497	20.7995	21.4495	12.6747
153	25.9994	18.1995	27.9493	23.7244	19.1745	23.7244	13.6497	20.7995	21.7745	12.9997
154	26.3243	18.5245	27.2993	24.0494	18.8495	23.7244	13.9747	20.7995	22.0994	13.3247
155	26.3243	17.5496	27.6243	23.3994	18.8495	23.7244	13.6497	21.1245	21.7745	12.9997
156	26.3243	17.5496	27.9493	24.3744	18.8495	23.3994	13.9747	21.1245	21.7745	12.9997
157	26.6493	17.5496	27.6243	24.0494	19.1745	23.7244	13.9747	21.1245	21.7745	12.6747
158	26.3243	18.1995	27.6243	24.6994	18.8495	23.3994	13.6497	21.1245	22.4244	12.6747
159	25.6744	17.8746	27.6243	24.0494	18.8495	23.3994	13.9747	21.1245	21.4495	12.9997
160	26.3243	18.5245	27.6243	23.7244	19.1745	23.7244	13.6497	20.7995	21.7745	12.6747
161	27.2993	18.1995	27.9493	23.7244	18.8495	23.7244	13.6497	21.1245	21.7745	12.6747
162	26.6493	18.5245	27.9493	24.0494	18.8495	23.7244	13.6497	21.1245	22.0994	12.9997
163	26.3243	18.5245	27.6243	24.0494	19.1745	23.7244	13.6497	21.1245	21.7745	12.6747
164	25.9994	18.1995	27.6243	24.0494	18.8495	23.7244	13.6497	21.1245	21.4495	12.6747
165	26.6493	18.8495	27.9493	23.7244	19.1745	23.7244	13.6497	21.4495	21.7745	12.6747
166	26.6493	18.5245	27.6243	24.0494	19.1745	24.0494	13.9747	21.1245	22.4244	12.9997
167	25.9994	18.1995	27.6243	24.3744	19.1745	23.7244	13.6497	20.7995	21.4495	12.9997
168	25.6744	18.1995	27.6243	24.0494	18.8495	23.3994	13.6497	21.7745	21.7745	12.6747
169	25.9994	17.8746	27.9493	24.0494	19.1745	23.3994	13.6497	21.4495	22.0994	12.3497
170	25.6744	18.8495	27.2993	24.0494	18.8495	23.3994	13.6497	21.4495	21.7745	12.3497
171	25.3494	18.5245	27.2993	24.0494	18.8495	23.7244	13.3247	21.1245	22.0994	12.6747
172	25.6744	18.1995	27.6243	24.0494	18.8495	23.0744	13.3247	20.7995	22.0994	12.9997
173	25.9994	18.5245	27.6243	24.0494	18.8495	23.7244	13.6497	20.7995	22.0994	12.6747
174	25.6744	18.1995	27.6243	24.0494	18.8495	23.7244	13.9747	21.4495	21.7745	12.6747
175	25.9994	18.5245	27.6243	24.0494	18.8495	23.7244	13.6497	21.7745	22.0994	12.3497
176	26.3243	18.5245	27.6243	24.0494	18.8495	23.7244	13.9747	21.4495	22.0994	12.6747
177	25.9994	18.5245	27.9493	24.0494	18.8495	23.3994	13.6497	21.7745	22.4244	12.3497
178	25.9994	18.5245	27.6243	24.0494	18.8495	23.3994	13.3247	21.1245	21.7745	13.3247
179	25.9994	17.8746	27.6243	24.3744	18.8495	23.7244	13.9747	21.7745	21.7745	12.6747
180	25.9994	18.1995	27.6243	24.3744	19.1745	23.3994	13.6497	21.7745	21.7745	12.6747
181	25.9994	18.5245	27.9493	24.0494	18.8495	23.7244	13.3247	21.4495	21.7745	12.6747
182	25.6744	18.1995	27.6243	23.7244	18.8495	23.7244	13.6497	21.1245	22.4244	12.3497
183	26.3243	18.1995	27.6243	23.7244	18.8495	23.7244	13.6497	21.1245	22.0994	12.6747
184	26.3243	18.1995	27.6243	23.7244	19.1745	23.3994	13.6497	20.4745	21.7745	12.6747
185	26.3243	18.5245	27.6243	24.0494	18.8495	23.3994	13.9747	21.1245	22.4244	12.9997
186	26.9743	17.8746	27.9493	23.7244	19.1745	23.7244	13.3247	20.7995	22.0994	12.3497
187	25.9994	17.8746	27.6243	24.0494	18.8495	24.0494	13.6497	20.4745	22.0994	12.6747
188	26.6493	18.1995	27.6243	24.3744	18.8495	23.7244	13.3247	21.1245	22.7494	12.6747
189	26.3243	17.5496	27.6243	24.0494	19.1745	23.7244	13.3247	21.1245	21.7745	12.3497
190	26.3243	17.2246	27.6243	24.0494	18.8495	23.3994	13.3247	20.7995	22.7494	12.6747
191	26.3243	17.5496	27.6243	23.7244	18.8495	23.3994	13.9747	21.1245	21.7745	12.6747
192	25.9994	17.8746	27.6243	24.0494	18.8495	23.7244	13.6497	20.4745	22.0994	12.3497
193	25.9994	18.1995	27.2993	24.0494	18.8495	23.7244	13.3247	20.7995	21.7745	12.6747
194	26.9743	17.8746	27.6243	24.3744	18.8495	24.0494	13.3247	20.7995	22.7494	12.6747
195	25.9994	17.5496	27.9493	24.6994	18.8495	23.3994	13.3247	20.4745	22.4244	12.6747
196	25.9994	17.8746	27.9493	24.0494	18.8495	23.7244	13.6497	20.4745	22.4244	12.6747
197	25.6744	18.1995	28.2743	23.7244	18.8495	23.7244	13.6497	19.8245	22.4244	12.6747
198	25.9994	17.2246	27.6243	24.3744	18.8495	23.7244	13.9747	20.7995	22.0994	12.6747
199	26.3243	17.2246	27.9493	24.0494	18.8495	23.7244	13.9747	20.4745	21.7745	12.6747
200	25.6744	17.8746	27.9493	24.0494	18.8495	24.0494	13.6497	20.1495	22.0994	12.6747
201	25.6744	18.1995	27.6243	24.0494	18.8495	23.3994	13.9747	20.4745	22.4244	12.6747
202	25.9994	17.2246	27.9493	24.0494	18.8495	23.7244	13.6497	20.4745	22.4244	12.6747
203	25.9994	17.5496	27.6243	24.0494	18.8495	23.3994	13.3247	20.4745	23.0744	12.6747
204	25.9994	17.5496	27.9493	23.7244	18.8495	23.7244	13.3247	20.4745	22.7494	12.6747
205	25.9994	17.8746	27.2993	24.0494	18.8495	23.3994	13.6497	21.1245	23.0744	12.9997
206	26.3243	17.8746	27.9493	24.0494	18.8495	23.7244	13.3247	20.4745	23.3994	12.6747
207	26.6493	17.5496	27.6243	24.0494	18.8495	23.7244	13.3247	20.7995	22.0994	12.6747
208	25.3494	17.5496	27.6243	24.0494	18.8495	23.7244	13.3247	20.7995	22.7494	12.9997
209	26.3243	17.5496	27.6243	24.0494	18.8495	23.7244	13.6497	19.8245	22.0994	12.6747
210	25.6744	17.8746	27.6243	24.0494	18.8495	23.7244	13.3247	20.7995	23.3994	12.6747
211	26.3243	17.5496	27.2993	24.3744	18.8495	23.7244	13.3247	20.4745	22.7494	12.6747
212	26.9743	18.5245	27.9493	24.3744	18.8495	23.3994	13.3247	20.4745	23.3994	12.3497
213	26.3243	17.2246	27.2993	24.0494	18.8495	23.7244	13.6497	20.4745	22.7494	12.6747
214	25.6744	17.8746	27.6243	24.3744	18.8495	23.7244	13.3247	20.4745	22.0994	12.6747
215	26.6493	17.5496	27.6243	24.3744	18.8495	23.3994	13.6497	20.4745	21.7745	12.3497
216	25.6744	17.5496	27.2993	23.7244	18.8495	23.7244	13.9747	20.7995	22.4244	12.6747
217	26.3243	17.8746	27.6243	23.7244	18.8495	23.3994	13.3247	20.7995	23.3994	12.6747
218	25.9994	17.8746	27.6243	23.7244	18.8495	24.0494	13.6497	20.7995	23.3994	12.6747
219	26.3243	18.5245	27.2993	23.7244	18.8495	23.7244	13.6497	20.4745	23.0744	12.9997
220	26.6493	17.2246	27.6243	23.3994	18.8495	23.3994	13.9747	20.7995	23.7244	12.6747
221	25.9994	17.8746	27.6243	23.7244	18.8495	23.7244	13.9747	20.4745	22.7494	12.6747
222	25.9994	17.5496	27.6243	23.7244	18.8495	23.7244	13.3247	20.7995	22.4244	12.6747
223	26.3243	17.5496	27.2993	23.3994	18.8495	23.0744	13.6497	20.4745	23.0744	12.6747
224	26.6493	17.5496	27.2993	23.7244	18.8495	23.7244	13.3247	20.4745	22.7494	12.6747
225	25.9994	17.5496	27.6243	23.7244	18.8495	23.3994	13.9747	20.4745	23.0744	12.6747
226	25.6744	17.2246	27.6243	24.3744	18.8495	23.7244	13.6497	20.4745	22.4244	12.6747
227	26.6493	17.5496	27.2993	24.0494	18.8495	24.0494	13.6497	20.4745	22.7494	12.3497
228	25.3494	17.5496	27.6243	24.0494	18.8495	23.7244	13.6497	20.4745	22.0994	12.0247
229	25.6744	18.1995	27.6243	23.7244	18.8495	24.0494	13.6497	21.1245	23.0744	12.6747
230	25.6744	17.5496	27.6243	24.0494	18.8495	23.7244	13.6497	21.1245	23.0744	12.6747
231	26.6493	17.5496	27.6243	24.3744	18.8495	23.7244	13.3247	20.1495	22.4244	13.3247
232	26.3243	17.5496	27.6243	23.7244	18.8495	23.7244	13.6497	20.7995	22.7494	12.9997
233	25.9994	18.1995	27.2993	23.3994	18.8495	23.7244	13.6497	20.4745	23.0744	12.6747
234	25.9994	17.8746	27.2993	23.3994	18.8495	23.7244	13.3247	20.1495	22.4244	12.6747
235	25.9994	17.5496	27.6243	23.3994	18.8495	23.3994	13.3247	20.7995	23.0744	12.6747
236	26.3243	17.8746	27.6243	23.3994	18.8495	23.3994	13.6497	20.1495	23.0744	12.6747
237	25.6744	17.5496	27.2993	24.0494	18.8495	23.7244	13.6497	20.4745	22.7494	12.9997
238	26.3243	17.8746	27.2993	23.7244	18.5245	23.7244	13.3247	20.7995	23.7244	12.9997
239	25.6744	17.8746	27.2993	23.7244	18.8495	23.7244	13.3247	21.1245	22.4244	12.9997
240	25.9994	17.8746	27.2993	23.7244	18.8495	23.3994	13.3247	20.7995	22.7494	12.6747
241	25.9994	17.5496	27.2993	23.0744	18.8495	23.7244	13.3247	21.1245	23.3994	12.9997
242	26.6493	17.8746	27.6243	24.0494	18.8495	23.7244	13.3247	20.4745	23.7244	12.6747
243	26.3243	17.5496	27.6243	23.3994	18.8495	23.7244	13.6497	20.4745	23.0744	12.9997
244	26.3243	17.8746	27.2993	23.0744	18.8495	23.7244	13.6497	19.8245	22.7494	12.6747
245	25.9994	17.2246	27.6243	23.3994	18.8495	23.7244	13.3247	20.4745	22.0994	12.6747
246	26.3243	17.5496	27.2993	23.3994	18.8495	23.7244	13.3247	20.7995	22.7494	12.9997
247	26.6493	17.2246	27.6243	23.7244	18.8495	23.3994	13.6497	20.1495	22.4244	13.3247
248	25.9994	18.1995	27.6243	23.7244	18.8495	23.3994	13.3247	21.1245	22.7494	12.9997
249	25.9994	17.8746	27.2993	24.0494	18.8495	23.3994	13.3247	21.1245	22.7494	12.3497
250	26.6493	18.1995	27.6243	23.7244	18.8495	23.3994	13.3247	20.4745	22.7494	12.6747
251	26.3243	17.8746	27.2993	24.0494	18.8495	23.7244	13.3247	20.1495	22.7494	12.6747
252	26.6493	17.8746	27.6243	23.7244	18.8495	23.7244	13.3247	20.4745	23.0744	12.9997
253	25.9994	17.8746	27.6243	23.7244	18.8495	23.7244	13.6497	20.4745	22.7494	12.6747
254	25.9994	17.8746	27.6243	23.7244	18.8495	23.7244	13.3247	20.4745	23.3994	12.6747
255	26.6493	17.8746	27.2993	24.0494	18.8495	23.7244	13.6497	21.1245	21.7745	12.9997
256	25.9994	17.5496	27.2993	23.7244	18.8495	23.3994	13.3247	20.7995	22.0994	12.3497
257	25.9994	17.8746	27.9493	23.3994	18.8495	23.3994	13.3247	20.4745	23.7244	12.3497
258	25.9994	17.5496	27.9493	23.7244	18.8495	23.3994	13.3247	20.1495	22.4244	12.9997
259	26.3243	18.1995	27.6243	23.7244	18.8495	24.0494	13.3247	20.4745	22.0994	12.3497
260	25.6744	18.1995	27.6243	23.7244	18.5245	23.7244	13.3247	20.4745	22.4244	12.9997
261	26.3243	17.8746	27.6243	23.7244	18.8495	23.7244	13.6497	20.1495	23.0744	12.3497
262	25.9994	17.8746	27.6243	23.7244	18.8495	24.0494	13.3247	20.1495	22.4244	12.9997
263	27.2993	17.5496	27.6243	23.3994	18.8495	23.7244	13.3247	20.1495	22.7494	12.3497
264	26.3243	17.8746	27.2993	23.7244	19.1745	23.7244	13.6497	20.1495	23.0744	12.9997
265	26.6493	18.5245	27.6243	23.3994	18.8495	23.7244	13.3247	20.4745	23.0744	12.6747
266	26.3243	17.8746	27.6243	23.7244	18.5245	23.7244	13.3247	20.1495	23.3994	12.6747
267	25.6744	18.1995	27.6243	24.0494	18.8495	23.7244	13.3247	20.1495	23.0744	12.6747
268	25.6744	17.8746	27.2993	23.3994	19.1745	23.7244	13.3247	19.8245	22.7494	12.6747
269	26.6493	17.8746	27.6243	23.7244	18.8495	24.0494	13.3247	20.7995	22.0994	12.6747
270	25.6744	17.2246	27.6243	24.0494	18.8495	23.7244	13.3247	20.7995	22.4244	12.6747
271	26.6493	17.5496	27.6243	24.0494	18.8495	23.7244	13.3247	20.4745	22.4244	12.6747
272	25.6744	17.8746	27.6243	23.0744	18.8495	23.7244	13.6497	20.7995	23.0744	12.6747
273	26.3243	17.8746	27.2993	23.7244	18.8495	24.0494	13.3247	20.1495	23.7244	12.6747
274	26.3243	17.8746	27.6243	23.7244	18.8495	23.3994	13.3247	20.4745	22.7494	12.6747
275	26.6493	18.5245	27.6243	23.7244	18.5245	24.0494	13.6497	20.4745	23.3994	12.3497
276	26.6493	17.5496	27.2993	23.7244	18.8495	23.7244	13.3247	20.4745	22.4244	12.6747
277	25.9994	17.8746	27.6243	23.7244	18.8495	23.7244	13.3247	20.4745	21.7745	12.6747
278	25.9994	17.8746	27.6243	23.3994	18.5245	23.7244	13.6497	20.1495	22.7494	12.3497
279	26.3243	18.5245	27.6243	23.3994	18.5245	24.0494	13.3247	20.4745	22.7494	12.9997
280	26.9743	18.5245	27.2993	23.3994	18.5245	23.3994	13.3247	20.1495	23.3994	12.6747
281	26.3243	17.8746	27.6243	23.7244	18.5245	23.7244	13.3247	20.1495	22.7494	12.9997
282	25.6744	17.8746	27.2993	23.7244	18.5245	23.3994	12.9997	20.7995	23.0744	12.6747
283	26.6493	18.5245	27.2993	23.7244	18.5245	23.7244	13.3247	20.4745	22.7494	12.9997
284	26.3243	17.8746	27.2993	23.3994	18.8495	24.0494	13.3247	20.1495	22.7494	13.3247
285	27.2993	17.8746	27.2993	24.0494	18.5245	23.7244	13.6497	20.7995	22.0994	12.6747
286	26.3243	18.5245	27.2993	23.7244	18.5245	23.7244	13.3247	20.7995	22.4244	12.9997
287	26.6493	18.1995	27.6243	23.7244	18.8495	23.7244	13.3247	20.4745	22.4244	12.6747
288	25.9994	18.1995	27.2993	23.3994	18.5245	24.0494	13.3247	20.7995	22.7494	12.6747
289	25.9994	18.1995	27.9493	23.7244	18.8495	23.3994	13.6497	20.7995	22.4244	13.3247
290	26.3243	17.8746	27.2993	24.0494	18.5245	23.7244	13.6497	20.4745	22.4244	12.9997
291	26.3243	17.5496	27.2993	23.7244	18.5245	23.7244	13.3247	20.4745	22.7494	12.9997
292	26.6493	17.5496	27.6243	23.7244	18.8495	23.3994	13.3247	20.7995	22.0994	12.6747
293	26.3243	17.8746	27.6243	23.0744	18.8495	23.3994	13.6497	21.1245	22.4244	12.6747
294	26.6493	17.8746	27.6243	23.3994	18.8495	23.7244	13.6497	20.4745	22.4244	12.6747
295	26.6493	17.5496	27.9493	23.7244	18.8495	23.0744	13.3247	20.7995	22.0994	12.6747
296	26.9743	17.8746	27.6243	23.7244	18.5245	23.7244	12.9997	20.7995	22.7494	12.6747
297	26.6493	17.8746	27.2993	23.3994	18.5245	23.7244	13.3247	21.1245	22.0994	12.9997
298	26.3243	17.5496	27.6243	23.7244	18.5245	23.3994	13.3247	21.1245	22.7494	12.6747
299	26.3243	17.5496	27.2993	23.3994	18.5245	23.0744	13.3247	20.7995	22.0994	12.9997
300	27.2993	17.5496	27.2993	24.0494	18.5245	23.3994	13.3247	20.7995	22.4244	12.9997
301	26.6493	17.5496	27.2993	23.7244	18.5245	23.7244	13.3247	21.1245	22.0994	12.9997
302	26.9743	17.2246	27.6243	23.7244	18.5245	23.0744	13.3247	20.4745	22.7494	12.6747
303	26.9743	17.5496	27.6243	23.7244	18.5245	23.3994	13.3247	20.7995	23.3994	12.9997
304	26.6493	17.5496	27.2993	23.7244	18.8495	23.3994	13.6497	20.7995	22.7494	12.6747
305	26.6493	17.5496	27.9493	23.3994	18.5245	23.3994	13.6497	20.7995	23.0744	12.3497
306	26.3243	18.1995	27.2993	23.7244	18.5245	23.0744	13.3247	21.1245	22.0994	12.6747
307	26.6493	17.5496	27.2993	23.3994	18.5245	23.3994	13.6497	21.1245	22.4244	12.3497
308	26.6493	17.5496	27.2993	24.0494	18.5245	23.0744	12.9997	20.4745	23.0744	12.6747
309	26.6493	18.1995	27.2993	23.7244	18.8495	23.3994	12.9997	20.7995	22.4244	12.3497
310	26.6493	18.5245	27.6243	24.0494	19.1745	23.0744	13.6497	20.7995	22.7494	12.9997
311	26.3243	17.8746	27.2993	23.7244	18.8495	23.3994	12.9997	20.7995	22.4244	12.6747
312	26.6493	17.2246	27.6243	23.3994	18.5245	23.0744	13.3247	20.4745	23.3994	12.9997
313	26.3243	18.1995	27.2993	23.7244	18.5245	23.7244	13.9747	20.7995	23.0744	12.6747
314	25.9994	18.1995	27.6243	23.3994	18.5245	23.7244	13.6497	21.4495	22.4244	12.6747
315	27.2993	17.5496	27.6243	23.3994	18.5245	23.7244	13.6497	21.1245	22.7494	12.6747
316	26.9743	17.2246	27.2993	23.7244	18.8495	23.3994	13.3247	21.1245	22.4244	12.9997
317	26.9743	17.5496	27.2993	23.3994	18.5245	23.3994	13.6497	21.1245	23.0744	12.6747
318	26.3243	17.5496	27.6243	23.7244	18.5245	23.0744	13.3247	21.1245	23.0744	12.6747
319	26.3243	17.2246	27.6243	23.3994	18.5245	23.3994	13.3247	21.1245	23.0744	12.6747
320	26.3243	17.8746	27.2993	23.3994	18.5245	23.7244	13.6497	20.7995	23.0744	12.9997
321	26.3243	17.5496	27.2993	23.7244	19.1745	23.7244	13.6497	20.7995	22.0994	12.6747
322	26.6493	17.8746	27.2993	23.7244	18.5245	23.3994	12.9997	20.4745	22.7494	13.3247
323	26.6493	17.5496	27.2993	23.3994	18.5245	23.7244	12.9997	21.1245	22.0994	12.9997
324	26.3243	17.8746	27.6243	23.7244	18.8495	23.3994	13.3247	20.7995	22.4244	12.6747
325	26.3243	18.5245	27.6243	23.3994	18.5245	23.7244	13.3247	21.1245	22.7494	13.3247
326	26.6493	17.8746	27.2993	23.7244	19.1745	23.7244	13.6497	20.7995	23.0744	12.9997
327	26.3243	17.8746	27.2993	23.7244	19.1745	23.7244	13.3247	20.7995	23.0744	12.9997
328	26.3243	18.1995	27.6243	24.0494	18.8495	23.3994	13.3247	20.7995	23.0744	12.6747
329	25.9994	18.5245	27.2993	23.7244	18.8495	23.3994	13.6497	21.1245	22.4244	13.3247
330	26.3243	18.1995	27.6243	22.7494	18.5245	23.3994	13.3247	20.7995	22.7494	12.6747
331	26.3243	17.8746	27.6243	23.7244	18.5245	23.7244	13.3247	20.7995	22.4244	12.6747
332	26.6493	17.8746	27.6243	23.0744	18.8495	23.7244	13.6497	21.1245	22.4244	12.6747
333	26.6493	17.5496	27.9493	23.3994	18.5245	23.7244	13.6497	21.1245	22.4244	12.9997
334	26.3243	17.5496	27.6243	23.7244	18.5245	23.3994	13.6497	20.7995	22.7494	12.9997
335	26.3243	17.5496	27.6243	23.7244	18.8495	23.7244	13.3247	21.1245	22.7494	12.6747
336	26.3243	17.8746	27.2993	23.7244	18.5245	23.3994	13.6497	21.1245	23.3994	12.9997
337	26.9743	17.5496	27.2993	23.3994	18.5245	23.7244	13.6497	21.1245	22.7494	13.3247
338	26.3243	17.8746	27.6243	23.7244	19.1745	23.3994	13.6497	21.1245	22.4244	12.9997
339	26.6493	17.8746	27.6243	23.0744	18.5245	23.7244	13.3247	21.1245	22.4244	12.6747
340	26.6493	18.1995	27.6243	23.7244	19.1745	23.3994	13.3247	20.7995	22.7494	12.6747
341	26.6493	17.8746	27.2993	23.3994	18.5245	23.3994	12.9997	20.7995	22.4244	12.9997
342	26.3243	17.5496	27.6243	23.7244	18.5245	23.7244	13.6497	20.7995	22.7494	12.9997
343	26.3243	17.8746	27.6243	23.7244	18.5245	23.3994	13.3247	21.1245	22.0994	12.9997
344	27.2993	17.8746	27.2993	23.7244	18.5245	23.3994	13.6497	20.7995	22.7494	12.3497
345	25.9994	17.8746	26.9743	23.7244	18.8495	23.3994	13.3247	20.7995	23.0744	12.9997
346	26.3243	17.8746	27.6243	22.7494	18.8495	23.7244	13.6497	20.4745	22.4244	12.6747
347	27.2993	17.2246	27.6243	23.3994	19.1745	23.7244	13.6497	21.4495	22.4244	12.9997
348	26.3243	17.2246	27.2993	23.0744	19.1745	23.3994	13.6497	21.1245	23.0744	12.9997
349	26.3243	17.5496	27.6243	23.7244	18.8495	23.0744	12.9997	21.1245	22.7494	12.9997
350	27.2993	18.1995	27.6243	23.7244	18.8495	23.7244	13.6497	21.1245	22.7494	12.6747
351	26.9743	17.5496	27.6243	23.7244	18.8495	23.3994	13.6497	21.4495	22.7494	12.9997
352	26.6493	17.5496	27.6243	23.3994	18.8495	23.0744	13.6497	21.4495	22.4244	12.6747
353	26.3243	17.5496	27.6243	23.7244	18.8495	23.3994	13.6497	21.4495	22.7494	12.9997
354	27.2993	17.8746	27.6243	23.3994	18.8495	23.7244	13.3247	21.1245	22.7494	12.9997
355	26.6493	17.2246	27.9493	23.0744	18.8495	23.3994	13.6497	20.7995	22.7494	12.6747
356	27.2993	17.8746	27.6243	23.0744	18.8495	23.7244	13.6497	20.7995	22.0994	12.9997
357	26.6493	17.5496	27.2993	23.7244	18.8495	23.7244	13.6497	21.1245	22.7494	12.9997
358	26.3243	17.8746	27.2993	23.3994	18.8495	23.7244	13.6497	20.1495	23.0744	12.9997
359	25.9994	17.5496	26.9743	23.0744	18.8495	23.7244	13.3247	20.7995	22.7494	12.6747
360	26.3243	17.8746	27.2993	23.7244	18.8495	23.3994	13.6497	21.1245	22.4244	12.9997
361	25.9994	17.8746	27.2993	23.0744	18.8495	23.7244	13.6497	20.4745	21.7745	12.9997
362	26.9743	17.8746	27.2993	23.7244	18.8495	23.7244	13.3247	21.1245	22.0994	12.9997
363	26.6493	17.5496	27.6243	23.3994	18.8495	23.0744	13.6497	20.7995	23.0744	12.6747
364	27.2993	17.5496	27.9493	23.7244	18.8495	23.7244	13.6497	20.4745	22.4244	12.9997
365	26.9743	17.5496	27.6243	23.3994	19.1745	23.7244	13.6497	20.4745	22.4244	12.9997
366	26.6493	17.5496	27.6243	23.3994	18.8495	23.0744	13.6497	20.7995	23.0744	12.9997
367	26.9743	18.1995	27.6243	23.0744	18.8495	23.0744	13.6497	21.4495	22.4244	12.9997
368	26.3243	18.1995	27.2993	23.3994	18.5245	23.3994	13.6497	21.7745	22.4244	12.6747
369	26.9743	18.1995	27.2993	23.0744	18.8495	23.7244	13.6497	20.7995	23.0744	12.9997
370	26.9743	17.8746	27.2993	23.3994	18.8495	23.3994	13.6497	21.1245	21.7745	12.9997
371	26.3243	18.1995	27.2993	23.7244	18.8495	23.3994	13.6497	21.4495	22.7494	13.3247
372	26.9743	18.1995	26.9743	23.3994	18.8495	23.0744	13.6497	20.7995	22.4244	12.3497
373	26.9743	18.1995	27.6243	23.3994	18.8495	23.3994	13.6497	20.4745	22.7494	12.6747
374	26.3243	18.1995	27.2993	23.7244	18.8495	23.7244	13.6497	21.4495	23.0744	12.9997
375	26.3243	17.5496	26.9743	23.0744	18.5245	23.7244	13.3247	21.1245	22.7494	13.3247
376	26.6493	17.5496	27.6243	23.0744	19.1745	23.3994	13.6497	21.1245	22.4244	12.9997
377	26.6493	17.8746	27.6243	23.0744	18.8495	23.7244	13.3247	20.7995	22.4244	12.9997
378	26.9743	17.8746	27.6243	23.7244	18.8495	23.3994	13.3247	20.4745	21.7745	12.6747
379	26.3243	17.8746	27.6243	23.7244	18.8495	23.7244	13.6497	21.1245	22.7494	12.9997
380	26.6493	17.8746	27.2993	23.0744	18.8495	23.0744	13.3247	20.7995	22.7494	12.9997
381	26.9743	18.1995	27.2993	23.3994	18.8495	23.3994	12.9997	21.1245	22.7494	13.3247
382	27.2993	17.8746	27.9493	23.0744	18.8495	23.3994	13.3247	20.7995	22.0994	12.9997
383	26.9743	18.1995	27.2993	23.0744	18.8495	23.7244	13.6497	20.7995	22.4244	12.6747
384	27.6243	18.1995	27.6243	23.3994	19.1745	23.3994	13.3247	20.4745	22.4244	12.9997
385	26.6493	18.5245	27.9493	22.7494	19.1745	23.0744	13.6497	20.7995	22.4244	12.6747
386	27.2993	18.5245	27.6243	23.3994	18.8495	23.3994	13.6497	20.1495	22.0994	12.9997
387	26.3243	18.5245	27.6243	23.7244	18.8495	23.3994	13.6497	20.7995	22.4244	12.9997
388	26.9743	18.5245	27.2993	23.3994	18.8495	23.3994	13.6497	20.7995	22.4244	12.9997
389	27.2993	18.5245	26.9743	23.0744	18.8495	23.3994	13.3247	21.4495	22.4244	12.6747
390	27.2993	17.8746	27.6243	23.3994	18.8495	23.3994	13.3247	21.1245	22.4244	12.9997
391	27.2993	18.5245	27.6243	23.3994	18.8495	23.0744	13.6497	20.7995	22.4244	12.9997
392	27.6243	18.1995	27.2993	23.3994	19.1745	23.3994	13.3247	21.1245	21.7745	12.9997
393	26.9743	18.5245	27.2993	23.0744	18.8495	23.3994	12.9997	20.7995	22.7494	12.9997
394	27.2993	18.5245	27.2993	22.7494	18.8495	23.7244	13.6497	20.4745	22.4244	12.6747
395	27.2993	18.1995	27.6243	23.3994	18.8495	23.0744	13.6497	21.1245	22.4244	12.9997
396	27.9493	18.5245	27.6243	23.3994	18.8495	23.7244	13.3247	21.1245	22.7494	12.6747
397	27.2993	18.5245	27.6243	23.3994	18.8495	23.3994	13.6497	21.1245	22.0994	13.3247
398	26.6493	18.8495	27.6243	23.7244	18.8495	23.3994	13.3247	21.1245	22.7494	12.9997
399	27.6243	18.1995	27.6243	23.3994	18.8495	23.7244	13.6497	21.7745	22.4244	13.3247
400	26.9743	18.8495	27.6243	23.7244	18.8495	23.7244	13.6497	21.1245	22.4244	12.6747
401	26.9743	18.5245	27.2993	23.0744	18.8495	23.3994	13.6497	20.7995	22.4244	12.9997
402	26.9743	18.5245	27.6243	23.3994	18.5245	23.3994	13.3247	21.1245	22.4244	12.9997
403	26.9743	18.5245	27.6243	23.7244	18.8495	23.3994	13.6497	21.1245	22.4244	12.6747
404	26.9743	18.5245	27.6243	23.7244	18.8495	23.3994	13.6497	21.1245	22.0994	13.3247
405	26.6493	18.1995	27.2993	23.3994	18.8495	24.0494	13.6497	21.4495	22.0994	12.9997
406	26.6493	18.5245	27.6243	23.0744	18.8495	23.7244	13.6497	21.1245	22.0994	12.9997
407	26.6493	18.5245	27.9493	23.3994	18.8495	23.0744	13.6497	21.4495	22.0994	12.9997
408	27.6243	18.8495	27.6243	23.3994	18.8495	23.7244	13.6497	20.7995	22.4244	12.9997
409	27.9493	18.5245	27.6243	23.0744	18.8495	23.7244	13.6497	20.7995	22.7494	12.9997
410	26.6493	18.1995	27.2993	23.0744	18.5245	23.3994	13.3247	20.7995	22.0994	12.9997
411	27.2993	18.5245	27.9493	23.0744	18.8495	23.7244	13.6497	20.7995	22.0994	12.9997
412	28.2743	18.8495	27.6243	22.7494	18.5245	23.3994	13.3247	20.7995	22.0994	12.9997
413	26.9743	18.8495	27.2993	23.0744	18.8495	23.3994	13.3247	20.7995	22.4244	12.9997
414	27.2993	18.5245	27.6243	23.3994	18.8495	23.7244	13.3247	21.1245	22.7494	12.9997
415	26.3243	18.8495	27.6243	23.3994	18.8495	23.3994	13.3247	20.7995	22.4244	13.3247
416	27.2993	18.5245	27.9493	23.3994	18.8495	23.7244	13.6497	21.1245	22.0994	12.9997
417	26.6493	18.5245	27.2993	23.3994	18.8495	23.3994	13.3247	20.7995	22.0994	12.9997
418	28.2743	18.8495	27.6243	23.3994	18.8495	23.3994	13.6497	21.1245	22.4244	12.9997
419	27.9493	18.5245	27.6243	23.0744	18.8495	23.3994	13.6497	20.7995	22.0994	12.9997
420	26.6493	18.8495	27.6243	23.3994	18.8495	23.0744	13.3247	20.4745	22.7494	12.9997
421	26.9743	18.8495	27.2993	23.0744	18.8495	23.3994	13.3247	20.7995	22.0994	12.9997
422	26.9743	18.5245	27.9493	23.0744	18.8495	23.7244	13.6497	20.4745	22.7494	12.9997
423	26.9743	18.5245	27.2993	23.3994	18.8495	23.3994	13.3247	20.7995	22.0994	12.6747
424	26.6493	18.5245	26.9743	23.3994	18.8495	23.3994	13.6497	20.4745	22.7494	12.6747
425	26.6493	18.1995	27.6243	23.3994	18.5245	23.3994	13.3247	20.4745	22.0994	12.9997
426	27.2993	18.5245	27.6243	23.3994	18.5245	23.3994	13.6497	21.1245	22.0994	12.9997
427	26.6493	18.5245	27.2993	23.3994	18.8495	23.3994	12.9997	21.1245	22.4244	12.9997
428	26.6493	18.1995	27.6243	23.3994	18.5245	23.3994	12.9997	20.4745	22.7494	13.3247
429	26.9743	18.1995	27.2993	23.0744	18.8495	23.3994	13.6497	20.7995	22.7494	12.9997
430	27.2993	17.8746	27.2993	23.3994	18.8495	23.3994	13.3247	20.1495	22.7494	12.9997
431	27.2993	18.5245	27.9493	23.0744	18.8495	23.7244	13.3247	20.7995	23.0744	12.6747
432	26.9743	18.5245	27.6243	23.0744	18.8495	23.3994	13.3247	20.7995	23.0744	12.9997
433	27.6243	18.1995	27.6243	23.0744	18.8495	23.3994	13.3247	20.7995	22.4244	12.9997
434	27.2993	17.8746	27.2993	23.0744	18.8495	23.3994	13.3247	20.7995	22.4244	12.6747
435	26.9743	18.5245	27.9493	23.0744	18.8495	23.7244	13.3247	20.1495	22.7494	12.9997
436	26.9743	18.1995	27.6243	23.0744	18.8495	23.3994	13.3247	20.4745	22.7494	12.6747
437	27.6243	18.5245	27.6243	23.0744	18.8495	23.7244	13.3247	20.7995	23.0744	12.9997
438	26.3243	18.8495	27.6243	23.0744	18.8495	23.7244	13.3247	19.8245	22.7494	12.6747
439	26.9743	18.1995	27.2993	23.3994	18.8495	23.7244	13.3247	20.4745	22.0994	12.6747
440	26.9743	18.8495	27.2993	23.3994	18.8495	23.7244	13.6497	20.4745	22.4244	12.6747
441	27.2993	18.5245	27.2993	22.4244	18.8495	23.3994	13.6497	20.1495	23.3994	12.6747
442	26.6493	18.8495	26.9743	22.7494	18.8495	23.3994	13.3247	20.4745	23.0744	12.9997
443	27.2993	18.8495	26.3243	23.0744	18.8495	23.7244	13.6497	20.1495	22.7494	13.6497
444	26.6493	18.5245	26.3243	23.0744	18.8495	23.3994	13.3247	20.1495	22.0994	12.3497
445	27.2993	18.5245	26.9743	23.7244	18.8495	23.3994	12.9997	20.1495	22.7494	12.6747
446	27.2993	18.8495	26.9743	23.0744	18.8495	24.0494	13.3247	20.4745	23.0744	12.9997
447	27.9493	18.8495	27.6243	23.0744	18.8495	23.3994	13.3247	20.7995	22.7494	12.6747
448	26.3243	18.8495	27.2993	23.3994	18.8495	23.3994	13.3247	20.1495	22.0994	12.6747
449	26.3243	18.8495	26.9743	23.3994	18.8495	23.3994	13.6497	20.4745	22.4244	12.6747
450	27.2993	18.8495	26.6493	23.3994	18.8495	23.3994	13.3247	20.4745	23.0744	12.3497
451	26.6493	18.5245	26.9743	23.3994	18.8495	23.3994	12.9997	20.7995	22.7494	12.6747
452	27.2993	18.5245	27.2993	23.0744	18.8495	23.7244	13.3247	20.4745	23.3994	12.3497
453	26.6493	18.8495	27.2993	23.0744	18.8495	24.0494	12.9997	20.7995	22.4244	12.6747
454	26.9743	18.5245	26.9743	23.0744	18.8495	23.7244	12.9997	20.7995	22.7494	12.6747
455	26.9743	18.8495	26.9743	23.3994	18.8495	23.3994	12.9997	20.7995	21.7745	12.6747
456	26.6493	18.5245	26.9743	23.0744	18.8495	23.3994	12.9997	20.4745	21.4495	12.6747
457	26.6493	18.8495	26.9743	23.3994	18.8495	23.7244	12.9997	20.7995	23.0744	12.9997
458	26.9743	19.1745	27.2993	23.0744	18.8495	23.7244	12.9997	20.7995	22.4244	12.6747
459	26.6493	18.5245	26.9743	23.0744	18.8495	23.3994	13.3247	20.7995	23.0744	12.6747
460	26.9743	19.1745	26.9743	23.0744	18.8495	23.3994	12.9997	21.1245	22.7494	12.9997
461	27.2993	18.1995	27.2993	23.0744	18.8495	23.7244	12.9997	20.7995	23.0744	12.3497
462	26.9743	18.1995	27.2993	23.0744	18.8495	23.3994	13.3247	20.4745	22.4244	12.3497
463	26.9743	18.5245	27.2993	23.0744	18.5245	23.3994	12.9997	20.4745	23.0744	12.3497
464	27.9493	18.1995	26.9743	23.3994	18.5245	23.3994	12.9997	20.4745	23.0744	12.6747
465	26.6493	18.5245	27.2993	23.3994	18.5245	23.3994	13.3247	20.4745	22.0994	12.9997
466	27.6243	18.8495	27.9493	23.3994	18.8495	23.7244	12.9997	20.4745	22.0994	12.3497
467	26.9743	19.1745	27.2993	22.7494	18.8495	23.3994	12.9997	20.4745	23.0744	12.6747
468	25.9994	19.1745	26.9743	23.0744	18.8495	23.3994	12.9997	20.1495	22.4244	12.6747
469	27.2993	19.4995	26.9743	23.0744	18.5245	24.0494	13.3247	20.1495	22.7494	12.3497
470	26.6493	19.1745	27.2993	23.0744	18.8495	23.3994	12.9997	20.4745	22.7494	12.3497
471	26.6493	19.1745	27.2993	23.3994	18.8495	23.7244	13.3247	20.4745	22.4244	12.9997
472	26.9743	18.8495	27.6243	23.0744	18.5245	23.7244	12.9997	20.7995	23.0744	12.9997
473	26.6493	18.8495	26.9743	23.0744	18.5245	23.3994	13.3247	20.7995	22.4244	12.6747
474	26.9743	18.1995	27.6243	23.3994	18.8495	23.3994	13.3247	20.7995	22.4244	12.3497
475	26.6493	18.8495	26.9743	23.0744	18.5245	23.0744	13.3247	20.7995	23.0744	12.6747
476	26.9743	18.5245	27.2993	23.0744	18.5245	23.7244	13.3247	20.7995	23.3994	12.6747
477	26.9743	18.5245	27.2993	23.3994	18.5245	23.3994	12.9997	20.4745	22.7494	12.3497
478	26.9743	19.1745	26.9743	22.7494	18.8495	23.7244	12.9997	20.7995	23.0744	12.9997
479	27.6243	19.1745	27.2993	23.3994	18.5245	23.7244	12.9997	20.4745	23.3994	12.6747
480	26.9743	18.5245	27.2993	23.0744	18.5245	23.7244	13.3247	20.4745	23.3994	12.3497
481	27.2993	19.1745	27.2993	23.3994	18.5245	23.7244	13.6497	20.7995	22.7494	12.6747
482	27.2993	19.4995	27.2993	23.0744	18.5245	23.7244	13.3247	20.4745	22.0994	12.9997
483	26.9743	18.8495	26.9743	23.0744	18.5245	23.3994	13.3247	20.7995	22.0994	12.3497
484	27.2993	19.1745	27.2993	23.3994	18.5245	23.7244	12.9997	20.7995	22.4244	12.3497
485	26.6493	18.8495	27.2993	22.7494	18.5245	23.3994	12.9997	20.4745	22.4244	12.6747
486	27.2993	19.1745	26.9743	23.0744	18.5245	23.3994	13.3247	20.7995	22.4244	12.6747
487	26.9743	18.8495	27.2993	23.0744	18.8495	23.3994	13.3247	21.1245	23.3994	12.6747
488	26.6493	18.5245	27.2993	23.0744	18.5245	23.7244	12.9997	21.1245	22.4244	12.6747
489	27.6243	18.1995	26.6493	22.7494	18.5245	23.7244	12.9997	20.4745	22.0994	12.6747
490	26.9743	18.5245	27.2993	23.0744	18.5245	23.7244	13.3247	20.4745	22.4244	12.6747
491	26.9743	18.1995	27.2993	23.0744	18.5245	23.3994	12.9997	20.1495	23.0744	12.9997
492	26.3243	18.8495	27.6243	23.3994	18.5245	23.7244	12.9997	20.4745	22.0994	12.6747
493	26.6493	17.8746	26.9743	23.0744	18.8495	23.7244	13.3247	20.7995	22.7494	12.6747
494	26.3243	18.1995	27.2993	23.0744	18.5245	23.3994	13.3247	20.4745	22.7494	12.9997
495	26.6493	18.8495	26.9743	23.0744	18.5245	23.7244	13.3247	20.7995	23.0744	12.9997
496	26.9743	18.8495	27.2993	23.3994	18.5245	23.7244	12.9997	20.7995	22.4244	12.6747
497	26.9743	18.8495	26.9743	23.0744	18.8495	23.7244	13.3247	20.7995	23.0744	12.9997
498	27.6243	17.8746	27.2993	23.3994	18.8495	23.7244	12.9997	20.7995	22.4244	12.6747
499	26.6493	18.1995	27.6243	23.0744	18.8495	23.7244	13.3247	20.7995	22.7494	12.3497
500	27.9493	17.8746	26.9743	23.0744	18.5245	23.7244	13.3247	20.7995	23.0744	12.3497
501	27.6243	18.8495	27.6243	23.0744	18.8495	23.3994	13.3247	20.4745	23.0744	12.9997
502	27.6243	18.1995	27.2993	23.0744	18.5245	23.7244	13.3247	20.7995	22.7494	12.6747
503	26.9743	18.5245	26.9743	23.0744	18.5245	23.7244	12.9997	20.4745	23.0744	12.3497
504	26.6493	17.8746	27.6243	23.0744	18.8495	24.0494	13.3247	20.7995	23.0744	12.9997
505	26.3243	18.8495	26.9743	22.7494	18.5245	23.7244	13.6497	20.4745	22.0994	12.6747
506	26.9743	18.8495	26.6493	22.7494	18.8495	23.7244	13.3247	20.7995	22.0994	12.3497
507	27.2993	19.1745	26.6493	23.0744	18.5245	23.3994	12.9997	21.1245	22.7494	12.3497
508	26.6493	18.1995	26.9743	23.3994	18.5245	23.7244	13.3247	20.7995	22.7494	12.6747
509	26.9743	18.1995	26.3243	23.7244	18.5245	23.3994	12.9997	20.7995	23.3994	12.3497
510	27.9493	18.5245	26.9743	23.0744	18.5245	23.7244	12.9997	20.7995	23.3994	12.6747
511	26.9743	18.5245	27.2993	23.7244	18.5245	23.3994	13.3247	20.7995	23.3994	12.3497
512	26.6493	18.1995	26.6493	23.7244	18.5245	24.0494	13.6497	20.7995	23.3994	12.9997
513	27.2993	17.5496	26.9743	23.0744	18.5245	23.3994	13.3247	21.1245	23.0744	12.6747
514	27.6243	18.5245	26.9743	23.0744	18.8495	23.0744	12.9997	20.4745	23.3994	12.6747
515	26.9743	18.1995	27.2993	23.0744	18.5245	23.3994	13.3247	20.4745	22.7494	12.6747
516	26.9743	18.1995	26.6493	22.7494	18.5245	23.3994	13.6497	20.4745	23.0744	12.6747
517	26.9743	17.5496	26.6493	23.3994	18.5245	23.3994	12.9997	20.7995	22.4244	12.6747
518	26.9743	18.5245	26.6493	23.3994	18.8495	23.3994	13.6497	20.4745	23.3994	12.3497
519	26.6493	17.8746	26.3243	23.0744	18.8495	23.7244	13.3247	20.4745	23.0744	12.3497
520	27.9493	18.8495	27.2993	23.3994	18.5245	23.7244	13.6497	20.7995	23.7244	12.6747
521	27.2993	18.1995	26.6493	23.3994	18.5245	23.0744	12.9997	20.7995	23.3994	12.6747
522	27.6243	18.1995	27.2993	23.7244	18.5245	23.7244	12.9997	20.7995	23.0744	12.6747
523	27.2993	18.5245	27.2993	22.7494	18.5245	23.3994	13.3247	20.4745	23.3994	12.6747
524	26.9743	18.5245	27.9493	22.7494	18.5245	23.3994	12.9997	20.7995	23.3994	12.3497
525	27.2993	18.5245	27.9493	23.3994	18.5245	23.7244	12.9997	20.4745	23.0744	12.6747
526	27.2993	18.1995	27.2993	23.3994	18.5245	23.7244	13.3247	21.1245	23.0744	12.6747
527	27.9493	18.1995	27.2993	23.0744	18.5245	23.7244	12.6747	21.4495	22.0994	12.3497
528	26.6493	18.5245	26.9743	22.7494	18.5245	23.0744	13.3247	21.7745	23.0744	12.6747
529	26.6493	18.1995	27.2993	22.4244	18.5245	23.7244	13.6497	21.1245	22.7494	12.3497
530	27.9493	18.1995	26.9743	23.3994	18.5245	23.3994	13.3247	21.1245	23.0744	12.3497
531	27.9493	18.8495	27.6243	23.3994	18.5245	24.0494	13.3247	21.1245	23.7244	12.3497
532	27.9493	18.1995	26.9743	23.3994	18.5245	23.7244	13.3247	21.1245	22.4244	12.3497
533	26.3243	18.1995	26.6493	23.0744	18.5245	23.7244	12.9997	21.1245	23.0744	12.9997
534	27.6243	18.5245	27.2993	23.0744	18.5245	24.0494	13.3247	21.1245	22.7494	12.3497
535	26.9743	19.1745	26.9743	22.7494	18.5245	23.0744	12.9997	21.1245	23.0744	12.6747
536	26.6493	17.8746	27.2993	23.0744	18.5245	23.3994	12.9997	21.1245	22.7494	12.6747
537	27.2993	17.8746	26.9743	22.7494	18.5245	23.3994	13.3247	21.4495	22.4244	12.3497
538	27.9493	18.5245	27.6243	23.0744	18.5245	23.0744	12.9997	21.4495	22.4244	12.6747
539	27.2993	19.1745	26.9743	23.0744	18.1995	23.3994	12.9997	21.1245	22.7494	12.6747
540	26.6493	18.5245	27.2993	23.0744	18.5245	23.3994	12.9997	21.4495	23.7244	12.3497
541	27.2993	18.1995	26.9743	23.0744	18.5245	23.7244	12.9997	21.4495	23.0744	12.6747
542	27.6243	18.5245	27.2993	23.0744	18.5245	23.3994	12.9997	21.4495	23.0744	12.3497
543	26.6493	18.1995	27.2993	23.0744	18.5245	23.7244	12.9997	21.4495	22.4244	12.9997
544	26.9743	18.1995	26.9743	23.0744	18.5245	23.7244	12.9997	21.4495	23.0744	12.6747
545	27.6243	18.1995	27.2993	23.0744	18.5245	23.3994	12.9997	21.4495	22.7494	12.3497
546	26.6493	18.5245	27.2993	23.0744	18.5245	24.0494	12.9997	21.4495	22.7494	12.6747
547	26.9743	18.1995	26.9743	23.0744	18.5245	23.3994	12.9997	20.7995	22.7494	12.0247
548	26.9743	18.1995	27.2993	22.7494	18.8495	23.3994	12.9997	21.4495	22.4244	12.3497
549	27.2993	18.1995	27.2993	22.7494	18.5245	23.3994	13.3247	21.1245	22.4244	12.0247
550	27.6243	18.1995	27.2993	23.0744	18.5245	23.3994	13.3247	21.1245	22.4244	12.6747
551	27.6243	18.5245	26.6493	23.0744	18.1995	23.3994	12.9997	21.1245	23.0744	12.3497
552	27.6243	18.1995	27.2993	23.0744	18.5245	23.3994	12.9997	21.4495	22.0994	12.6747
553	27.6243	17.8746	27.2993	23.0744	18.5245	23.3994	12.9997	21.4495	22.0994	12.6747
554	26.9743	18.8495	27.2993	22.7494	18.5245	23.3994	13.3247	21.4495	23.0744	12.3497
555	27.9493	18.5245	26.9743	22.7494	18.8495	23.0744	13.3247	21.4495	23.0744	12.3497
556	26.9743	18.5245	27.6243	22.7494	18.5245	23.0744	13.3247	20.7995	22.4244	12.3497
557	27.6243	19.1745	26.9743	23.0744	18.8495	23.3994	13.3247	21.1245	23.3994	12.3497
558	27.6243	17.8746	26.9743	23.0744	18.5245	23.7244	12.9997	21.7745	22.7494	12.6747
559	27.2993	18.1995	26.9743	23.3994	18.8495	23.3994	13.3247	21.4495	23.3994	12.6747
560	27.2993	18.8495	26.9743	22.4244	18.8495	23.3994	12.9997	21.4495	22.0994	12.6747
561	27.6243	19.1745	27.2993	23.0744	18.8495	23.3994	13.3247	21.4495	22.4244	12.6747
562	27.9493	18.5245	27.2993	23.3994	18.5245	23.3994	12.9997	21.7745	23.0744	12.6747
563	27.2993	18.5245	27.2993	23.0744	18.8495	23.3994	12.9997	21.7745	23.0744	12.6747
564	26.9743	18.1995	26.9743	23.0744	18.5245	23.3994	12.9997	21.4495	22.7494	12.3497
565	27.2993	18.1995	26.9743	23.0744	18.8495	23.7244	12.9997	21.4495	23.0744	12.6747
566	28.2743	18.5245	26.9743	22.7494	18.8495	23.7244	13.3247	21.1245	22.7494	12.6747
567	28.2743	18.5245	27.6243	23.0744	18.1995	23.3994	12.9997	20.7995	23.0744	12.9997
568	26.9743	18.8495	26.9743	23.0744	18.5245	23.0744	12.9997	21.1245	22.7494	12.6747
569	27.2993	18.5245	27.2993	22.7494	18.5245	23.3994	13.3247	21.4495	22.7494	12.6747
570	26.9743	18.1995	27.2993	23.0744	18.5245	23.0744	12.9997	21.4495	22.7494	12.9997
571	26.6493	18.1995	27.6243	23.3994	18.5245	23.3994	12.9997	21.1245	22.4244	12.6747
572	26.6493	18.1995	26.9743	23.0744	18.5245	23.3994	13.3247	21.1245	22.0994	12.6747
573	26.6493	18.8495	27.2993	22.7494	18.5245	23.3994	13.3247	21.1245	22.7494	12.6747
574	28.5993	18.1995	27.6243	23.3994	18.1995	23.7244	13.6497	20.7995	22.7494	12.6747
575	27.6243	18.5245	27.2993	23.0744	18.5245	23.0744	12.9997	20.4745	22.7494	12.6747
576	27.2993	18.1995	27.2993	23.7244	18.1995	23.3994	13.3247	21.1245	23.3994	12.6747
577	28.2743	18.1995	27.2993	23.3994	18.5245	23.0744	12.9997	21.1245	23.7244	12.3497
578	26.6493	17.8746	26.9743	23.0744	18.5245	23.7244	13.3247	21.1245	23.0744	12.9997
579	27.2993	17.8746	27.6243	22.7494	18.1995	23.3994	13.3247	21.4495	22.7494	12.3497
580	27.2993	18.5245	27.6243	23.0744	18.8495	23.0744	13.3247	21.4495	22.0994	12.3497
581	27.6243	18.1995	27.2993	23.0744	18.8495	23.7244	12.9997	21.1245	22.4244	12.6747
582	27.6243	18.1995	27.2993	23.0744	18.5245	23.3994	13.3247	21.4495	22.4244	12.6747
583	27.9493	18.1995	26.3243	23.0744	18.8495	23.7244	13.6497	21.1245	22.0994	12.6747
584	26.6493	18.8495	26.9743	23.0744	18.1995	23.0744	13.3247	21.7745	22.7494	12.6747
585	27.2993	18.1995	27.2993	23.3994	18.8495	23.0744	12.9997	21.7745	23.0744	12.3497
586	26.6493	18.1995	26.6493	23.0744	18.5245	23.3994	13.3247	21.7745	22.0994	12.6747
587	26.9743	18.1995	27.6243	22.7494	18.8495	23.3994	13.3247	21.7745	23.3994	12.6747
588	27.2993	18.1995	27.6243	23.0744	18.5245	23.7244	13.3247	21.4495	22.0994	12.3497
589	27.2993	18.8495	27.2993	23.3994	18.8495	23.0744	13.3247	21.1245	22.7494	12.9997
590	27.2993	18.1995	27.6243	23.3994	18.8495	23.0744	13.3247	21.7745	22.7494	12.6747
591	27.2993	18.5245	27.2993	23.0744	18.8495	23.7244	13.3247	21.7745	22.7494	12.6747
592	26.9743	18.1995	26.9743	23.0744	18.8495	23.0744	12.9997	21.7745	23.3994	12.6747
593	27.2993	18.5245	26.9743	23.3994	18.8495	23.0744	13.3247	21.7745	22.4244	12.3497
594	27.2993	18.1995	26.9743	22.7494	18.8495	23.3994	13.3247	21.7745	23.0744	12.6747
595	26.9743	18.1995	27.2993	23.3994	18.5245	23.3994	13.3247	21.4495	22.7494	12.6747
596	27.2993	17.8746	27.2993	23.3994	18.8495	23.3994	13.3247	21.4495	22.4244	12.3497
597	27.2993	17.8746	27.6243	23.0744	18.5245	23.7244	13.3247	21.4495	22.4244	12.9997
598	27.2993	18.5245	27.2993	23.0744	18.5245	23.0744	13.3247	21.4495	23.3994	12.9997
599	26.9743	18.5245	27.6243	23.3994	18.5245	23.3994	13.3247	20.7995	22.7494	12.6747
600	26.9743	18.5245	27.6243	22.7494	18.5245	23.0744	13.3247	21.1245	23.3994	12.3497
601	27.6243	18.1995	27.2993	23.0744	18.8495	23.3994	13.3247	20.7995	23.0744	12.3497
602	26.9743	18.1995	27.6243	23.0744	18.5245	23.0744	13.3247	19.8245	22.7494	12.6747
603	27.6243	18.5245	27.9493	23.3994	18.5245	23.0744	13.3247	20.4745	22.4244	12.6747
604	27.2993	18.5245	27.2993	23.0744	18.1995	23.3994	13.3247	20.7995	23.0744	12.6747
605	26.9743	18.5245	27.9493	23.3994	18.8495	23.3994	12.9997	20.7995	22.7494	12.0247
606	28.2743	18.5245	27.2993	23.0744	18.5245	23.3994	13.3247	21.1245	23.0744	12.3497
607	27.2993	18.5245	27.6243	23.3994	18.5245	23.7244	13.3247	20.7995	22.7494	12.6747
608	26.3243	18.5245	27.2993	23.0744	18.5245	23.0744	12.9997	20.1495	23.3994	12.3497
609	27.2993	17.8746	27.9493	23.0744	18.5245	23.3994	13.3247	20.4745	22.4244	12.9997
610	27.2993	17.8746	27.6243	22.7494	18.8495	23.3994	13.3247	20.1495	22.7494	12.3497
611	27.2993	18.5245	27.6243	23.0744	18.5245	23.3994	13.3247	20.4745	22.4244	12.6747
612	27.2993	18.1995	27.6243	23.0744	18.5245	23.3994	13.3247	20.7995	22.7494	12.6747
613	27.9493	18.5245	27.6243	23.0744	18.1995	23.3994	12.9997	20.7995	22.4244	12.9997
614	27.2993	18.8495	27.9493	23.0744	18.8495	23.0744	13.3247	20.4745	22.7494	12.6747
615	26.6493	18.5245	27.2993	23.3994	18.1995	23.3994	13.3247	20.7995	22.4244	12.6747
616	27.9493	18.8495	27.6243	23.0744	18.1995	23.3994	13.3247	21.1245	23.3994	12.6747
617	26.6493	18.5245	27.6243	23.0744	18.8495	23.7244	13.3247	21.1245	22.4244	12.6747
618	27.2993	18.5245	27.6243	23.0744	18.1995	23.0744	13.3247	20.1495	22.4244	12.6747
619	26.9743	18.5245	27.6243	23.0744	18.5245	23.0744	13.3247	20.7995	23.0744	12.3497
620	26.6493	19.1745	27.9493	23.0744	18.1995	23.0744	13.3247	20.7995	22.7494	12.6747
621	26.3243	18.1995	27.6243	23.3994	18.5245	23.3994	13.3247	20.7995	22.7494	12.3497
622	27.6243	18.5245	27.6243	23.0744	18.5245	23.0744	13.3247	20.7995	23.0744	12.6747
623	27.6243	18.5245	27.6243	23.0744	18.1995	23.3994	13.3247	20.4745	23.3994	12.6747
624	26.9743	18.8495	27.6243	23.0744	18.5245	23.3994	13.6497	21.1245	22.7494	12.9997
625	26.9743	18.8495	27.6243	23.0744	18.8495	23.7244	13.3247	20.7995	22.7494	12.3497
626	26.9743	18.5245	27.9493	23.3994	18.1995	23.3994	12.9997	20.1495	23.3994	12.6747
627	26.6493	18.8495	27.9493	23.0744	18.1995	22.7494	12.9997	20.7995	23.3994	12.6747
628	26.6493	18.1995	27.6243	23.3994	18.1995	23.0744	12.9997	21.1245	23.3994	12.6747
629	26.9743	18.5245	27.6243	22.4244	18.5245	23.7244	13.3247	20.7995	23.0744	12.9997
630	26.3243	18.5245	27.6243	23.3994	18.1995	23.0744	13.3247	20.4745	22.0994	12.0247
631	27.6243	18.1995	27.6243	23.0744	18.5245	23.3994	13.3247	20.4745	22.7494	12.6747
632	26.9743	18.5245	27.6243	23.3994	18.5245	23.3994	13.6497	20.7995	23.0744	12.9997
633	27.2993	18.5245	27.9493	22.7494	18.5245	23.3994	12.6747	21.1245	22.7494	12.3497
634	26.6493	18.8495	27.6243	22.7494	18.1995	23.7244	13.3247	20.7995	23.3994	12.6747
635	26.9743	18.5245	27.9493	23.0744	18.8495	23.3994	13.3247	21.4495	22.7494	12.3497
636	27.2993	18.8495	27.9493	22.7494	18.5245	22.7494	13.3247	21.1245	22.4244	12.3497
637	26.9743	18.1995	27.2993	23.0744	18.8495	23.0744	12.9997	20.7995	24.0494	12.6747
638	27.2993	18.5245	27.9493	23.0744	18.8495	23.3994	13.3247	20.4745	22.7494	12.0247
639	26.9743	18.5245	27.6243	23.0744	18.5245	22.7494	12.9997	20.7995	23.0744	12.3497
640	26.6493	18.8495	27.2993	23.3994	18.5245	23.7244	12.9997	20.7995	23.0744	12.3497
641	26.9743	18.8495	27.2993	23.0744	18.1995	23.7244	13.3247	20.7995	23.0744	12.9997
642	26.6493	18.8495	27.9493	23.0744	18.5245	23.3994	12.9997	21.1245	23.3994	12.3497
643	26.3243	18.8495	27.6243	22.7494	18.5245	23.3994	13.3247	21.1245	22.7494	12.3497
644	26.6493	18.8495	27.6243	23.0744	18.5245	23.3994	12.6747	21.1245	22.7494	12.3497
645	26.6493	18.5245	27.6243	23.0744	18.5245	23.3994	12.9997	20.7995	21.7745	12.3497
646	26.6493	18.1995	27.6243	22.7494	18.1995	23.0744	13.3247	20.4745	22.0994	12.3497
647	25.9994	18.8495	27.6243	23.0744	18.1995	23.3994	12.9997	21.1245	23.0744	12.3497
648	26.6493	18.5245	27.6243	22.7494	18.5245	23.3994	12.9997	21.4495	22.4244	13.3247
649	25.9994	18.8495	27.6243	22.7494	18.8495	23.0744	13.3247	20.7995	23.0744	12.6747
650	26.9743	18.5245	27.6243	22.7494	18.5245	23.7244	12.9997	21.1245	23.0744	12.9997
651	26.3243	17.8746	27.6243	23.0744	18.8495	23.3994	12.9997	21.4495	23.3994	12.6747
652	26.3243	18.8495	27.6243	23.0744	18.5245	23.3994	12.9997	21.4495	22.7494	12.6747
653	26.6493	18.8495	27.6243	23.3994	18.5245	23.3994	13.3247	21.1245	21.7745	12.3497
654	26.9743	19.1745	27.9493	22.7494	18.5245	23.3994	12.9997	21.1245	23.0744	12.6747
655	26.9743	18.1995	27.6243	23.3994	18.5245	24.0494	12.9997	20.7995	23.0744	12.3497
656	26.9743	18.5245	27.6243	23.0744	18.8495	23.3994	12.9997	21.7745	23.0744	12.3497
657	26.3243	18.5245	27.6243	23.0744	18.5245	23.3994	12.9997	21.7745	23.3994	12.3497
658	26.6493	18.5245	27.6243	23.0744	18.8495	23.3994	13.3247	21.7745	23.0744	12.3497
659	26.9743	18.5245	27.9493	22.7494	18.1995	23.7244	12.9997	22.4244	22.7494	12.6747
660	26.6493	18.5245	27.9493	23.0744	18.5245	23.7244	13.3247	22.0994	22.4244	12.3497
661	26.9743	18.5245	27.6243	23.0744	18.5245	23.3994	13.3247	22.0994	23.7244	12.3497
662	26.3243	18.5245	27.9493	22.7494	18.5245	23.3994	13.3247	21.4495	22.4244	12.3497
663	26.9743	18.1995	27.9493	23.0744	18.5245	23.3994	12.9997	21.7745	22.7494	12.3497
664	26.6493	18.1995	27.6243	22.7494	18.8495	23.7244	13.3247	21.4495	23.0744	12.3497
665	26.6493	18.1995	27.6243	22.7494	18.8495	24.0494	13.3247	21.4495	23.0744	12.6747
666	25.6744	18.1995	27.6243	23.0744	18.8495	23.3994	13.3247	21.7745	22.7494	12.3497
667	26.3243	18.1995	27.6243	22.4244	18.5245	23.3994	12.9997	21.4495	23.0744	12.6747
668	26.6493	18.5245	27.6243	22.7494	18.5245	23.7244	12.9997	21.7745	23.0744	12.3497
669	25.9994	18.5245	27.9493	22.7494	18.8495	23.3994	13.3247	21.4495	22.7494	12.6747
670	25.9994	18.5245	27.6243	22.7494	18.8495	23.7244	13.3247	21.7745	22.7494	12.3497
671	25.9994	18.1995	27.6243	22.7494	18.8495	23.3994	12.6747	21.4495	21.7745	12.9997
672	26.6493	18.1995	27.6243	22.7494	18.8495	23.3994	13.3247	21.1245	23.0744	12.3497
673	25.9994	18.1995	27.9493	22.7494	18.5245	23.3994	13.3247	21.1245	23.7244	12.3497
674	26.6493	18.5245	27.2993	22.7494	18.8495	24.0494	13.3247	21.4495	23.0744	12.6747
675	26.3243	18.5245	27.9493	23.3994	18.8495	23.3994	13.3247	21.7745	23.3994	12.6747
676	26.9743	18.1995	27.6243	22.7494	18.8495	23.3994	12.9997	21.4495	23.3994	12.6747
677	26.3243	18.1995	28.2743	22.4244	18.5245	23.3994	12.6747	21.1245	24.0494	12.3497
678	26.3243	18.5245	27.9493	22.7494	18.5245	23.7244	12.9997	21.1245	23.0744	12.3497
679	26.6493	18.5245	27.6243	23.0744	18.8495	23.7244	12.9997	21.7745	22.0994	12.3497
680	27.2993	18.1995	27.9493	22.7494	18.5245	23.7244	13.3247	21.7745	22.0994	12.3497
681	26.6493	17.5496	27.6243	22.4244	18.5245	23.3994	12.6747	21.4495	22.4244	12.6747
682	27.2993	18.1995	27.9493	23.0744	18.8495	24.0494	13.3247	22.0994	22.7494	12.3497
683	26.6493	17.8746	27.6243	23.0744	18.5245	23.7244	12.9997	22.0994	23.0744	12.9997
684	26.9743	18.1995	27.6243	23.0744	19.1745	23.7244	13.3247	22.0994	23.7244	12.6747
685	26.9743	18.5245	27.6243	22.4244	18.8495	23.3994	13.3247	21.7745	22.7494	12.3497
686	25.9994	18.1995	28.2743	22.7494	18.5245	24.0494	13.3247	21.7745	23.3994	12.6747
687	27.2993	18.1995	27.6243	22.7494	18.5245	23.7244	12.6747	21.7745	22.4244	12.6747
688	26.6493	18.5245	27.6243	22.7494	18.8495	23.7244	12.9997	22.0994	23.7244	12.6747
689	26.9743	17.8746	27.9493	23.3994	18.5245	23.3994	12.9997	21.7745	23.0744	12.0247
690	26.9743	18.1995	27.6243	22.7494	18.5245	23.0744	12.9997	22.0994	23.0744	12.3497
691	26.9743	18.5245	27.9493	22.7494	18.8495	23.7244	12.9997	22.0994	23.0744	12.3497
692	25.9994	18.5245	27.9493	22.4244	18.5245	23.3994	13.3247	22.0994	23.3994	12.3497
693	26.6493	18.1995	27.9493	22.7494	18.8495	23.7244	13.3247	22.0994	22.7494	12.6747
694	26.6493	18.5245	27.6243	22.7494	18.8495	23.3994	12.6747	21.4495	22.4244	12.6747
695	26.9743	18.5245	27.2993	23.0744	18.8495	23.3994	12.9997	21.7745	23.0744	12.3497
696	26.6493	18.5245	26.9743	22.7494	18.5245	23.3994	12.6747	22.0994	23.3994	12.6747
697	26.3243	18.5245	27.6243	23.0744	18.8495	23.7244	13.3247	22.0994	22.7494	12.9997
698	26.3243	18.5245	27.6243	23.0744	18.8495	23.7244	12.9997	21.7745	22.7494	12.3497
699	26.9743	18.5245	27.2993	22.0994	19.1745	23.7244	12.9997	21.7745	22.4244	12.3497
700	26.6493	18.1995	27.2993	23.0744	18.8495	23.7244	12.6747	22.0994	23.0744	12.3497
701	26.6493	17.8746	27.2993	22.4244	18.5245	23.7244	13.3247	21.7745	23.7244	12.6747
702	26.3243	18.8495	27.6243	23.3994	18.8495	23.3994	12.6747	21.4495	23.3994	12.3497
703	26.3243	18.1995	26.9743	22.7494	18.8495	23.7244	12.9997	21.7745	23.0744	12.3497
704	26.9743	18.5245	27.2993	22.4244	18.8495	23.3994	12.6747	21.4495	23.0744	12.0247
705	26.3243	18.5245	27.2993	22.7494	18.8495	23.3994	12.9997	21.7745	23.0744	12.6747
706	26.3243	17.8746	26.9743	23.0744	18.5245	23.3994	12.9997	21.7745	22.4244	12.6747
707	26.3243	18.1995	26.9743	22.4244	18.8495	23.3994	13.3247	22.4244	22.4244	12.6747
708	26.6493	18.5245	27.6243	22.7494	18.5245	23.3994	12.9997	22.0994	22.7494	12.6747
709	26.6493	18.1995	26.9743	22.7494	18.5245	23.3994	12.6747	22.0994	22.4244	12.3497
710	26.6493	18.5245	27.2993	22.4244	18.5245	23.7244	12.9997	22.0994	22.4244	12.3497
711	25.9994	18.5245	26.9743	22.4244	18.5245	23.7244	12.9997	21.7745	23.0744	12.3497
712	27.2993	18.1995	27.2993	22.7494	18.8495	24.0494	12.6747	22.0994	23.0744	12.6747
713	26.9743	17.8746	27.2993	23.0744	18.5245	23.3994	12.9997	22.0994	22.7494	12.3497
714	26.6493	18.5245	27.2993	22.7494	18.5245	23.3994	12.6747	22.0994	23.3994	12.6747
715	26.3243	18.5245	27.2993	22.7494	18.5245	23.3994	12.9997	22.0994	23.3994	12.3497
716	26.9743	18.1995	27.2993	22.4244	18.5245	23.7244	12.9997	21.7745	23.7244	12.3497
717	26.9743	18.1995	27.6243	22.4244	18.5245	23.3994	12.9997	21.7745	23.0744	12.3497
718	26.3243	18.5245	26.9743	22.4244	18.5245	23.3994	12.9997	22.0994	23.3994	12.3497
719	26.9743	18.5245	27.2993	22.7494	18.5245	23.7244	12.6747	22.0994	22.7494	12.3497
720	27.6243	18.1995	27.2993	22.7494	18.5245	23.7244	12.9997	22.0994	24.3744	12.3497
721	26.6493	18.5245	27.2993	22.4244	18.5245	23.7244	12.6747	21.7745	24.0494	12.3497
722	26.6493	18.1995	27.2993	22.7494	18.5245	23.7244	13.3247	22.0994	23.0744	12.3497
723	26.3243	18.1995	27.6243	22.7494	18.5245	23.3994	12.9997	22.0994	23.3994	12.3497
724	26.9743	18.8495	27.6243	22.7494	18.5245	24.0494	12.9997	21.7745	23.0744	12.3497
725	26.3243	18.8495	26.9743	22.4244	18.5245	23.3994	13.3247	21.7745	23.3994	12.3497
726	25.9994	18.5245	26.9743	22.4244	18.5245	24.0494	12.6747	22.0994	23.3994	12.3497
727	26.6493	18.5245	27.6243	22.7494	18.5245	23.3994	12.9997	22.4244	22.7494	12.6747
728	26.6493	18.5245	27.2993	22.4244	18.5245	23.7244	12.6747	22.0994	23.7244	12.3497
729	26.6493	18.5245	27.2993	23.0744	18.5245	23.3994	12.9997	21.7745	22.0994	12.3497
730	26.6493	18.5245	27.2993	22.7494	18.5245	23.7244	12.6747	22.0994	23.3994	12.6747
731	26.9743	17.8746	27.2993	22.7494	18.5245	23.7244	13.3247	21.7745	22.7494	12.9997
732	26.3243	18.1995	27.2993	23.0744	18.1995	23.7244	12.9997	21.7745	22.7494	12.3497
733	26.3243	18.5245	27.2993	22.7494	18.8495	23.0744	12.9997	21.4495	22.7494	12.3497
734	26.9743	18.5245	26.9743	22.7494	18.1995	23.7244	12.9997	21.4495	23.3994	12.3497
735	26.3243	18.1995	27.2993	23.0744	18.5245	23.3994	12.6747	21.7745	21.7745	12.3497
736	26.9743	18.1995	27.2993	22.7494	18.5245	23.3994	12.6747	21.7745	23.0744	12.3497
737	26.6493	18.5245	26.9743	22.0994	18.1995	23.3994	12.6747	21.7745	23.0744	12.3497
738	26.6493	18.1995	27.6243	22.7494	17.8746	23.3994	12.9997	21.1245	23.7244	12.3497
739	26.6493	18.1995	27.2993	23.0744	17.8746	23.3994	12.9997	21.7745	23.0744	12.3497
740	26.6493	18.8495	27.2993	23.0744	17.8746	23.3994	12.9997	21.4495	22.4244	12.3497
741	26.6493	18.8495	27.6243	22.7494	18.1995	23.3994	12.9997	21.4495	22.7494	12.3497
742	26.6493	18.5245	27.2993	22.0994	18.1995	23.3994	12.9997	21.7745	22.7494	12.3497
743	26.3243	18.8495	27.2993	22.7494	18.5245	23.3994	12.9997	21.4495	23.0744	12.6747
744	27.6243	18.5245	27.2993	22.4244	17.8746	23.7244	12.6747	21.4495	23.7244	12.3497
745	27.6243	18.1995	27.6243	23.0744	17.8746	23.3994	12.6747	21.4495	23.0744	12.6747
746	26.9743	18.5245	27.6243	22.4244	18.1995	23.7244	12.6747	21.4495	22.7494	12.3497
747	26.9743	18.5245	27.9493	22.7494	18.1995	23.3994	12.6747	22.0994	23.3994	12.9997
748	26.6493	18.1995	26.9743	22.7494	18.5245	23.3994	13.3247	21.7745	23.3994	12.3497
749	26.3243	18.8495	26.9743	23.0744	18.5245	23.7244	12.9997	21.7745	23.7244	12.6747
750	26.6493	18.8495	27.6243	22.7494	17.8746	23.3994	12.9997	21.7745	22.7494	12.0247
751	26.3243	18.1995	27.2993	23.0744	18.1995	23.3994	12.6747	20.7995	23.3994	12.6747
752	27.2993	18.1995	27.6243	22.7494	18.5245	23.3994	12.6747	21.1245	22.7494	12.3497
753	26.3243	18.5245	27.2993	23.3994	18.1995	23.0744	12.9997	20.7995	22.7494	12.3497
754	26.9743	18.1995	26.9743	22.7494	18.1995	23.3994	12.6747	21.1245	23.0744	12.3497
755	26.9743	18.5245	27.2993	23.0744	17.8746	23.0744	12.9997	21.7745	23.3994	12.6747
756	25.9994	18.1995	27.6243	22.7494	18.1995	23.3994	12.6747	21.4495	22.7494	12.6747
757	26.3243	18.1995	27.6243	22.7494	18.1995	23.0744	12.9997	22.0994	23.0744	12.3497
758	26.6493	18.1995	27.6243	22.4244	18.1995	23.3994	12.6747	21.7745	23.0744	12.3497
759	26.6493	18.1995	27.6243	22.7494	17.8746	23.3994	12.9997	22.4244	22.0994	12.3497
760	26.3243	17.8746	26.9743	22.7494	18.5245	23.3994	12.6747	22.0994	23.3994	12.3497
761	26.6493	18.1995	27.6243	22.7494	18.1995	23.3994	12.6747	21.7745	22.4244	12.3497
762	26.6493	18.5245	27.6243	22.4244	18.5245	23.3994	12.6747	21.7745	23.0744	12.0247
763	26.3243	18.5245	27.2993	22.4244	18.1995	23.0744	12.6747	22.0994	22.0994	12.3497
764	26.3243	18.1995	26.9743	22.7494	17.8746	23.3994	12.6747	21.7745	23.7244	12.0247
765	26.9743	18.1995	27.2993	22.7494	17.8746	24.0494	12.9997	21.7745	22.7494	12.3497
766	26.3243	18.1995	27.6243	23.3994	18.5245	23.3994	12.9997	22.0994	22.4244	12.3497
767	26.3243	17.8746	27.2993	22.7494	18.5245	23.3994	12.9997	21.7745	23.0744	12.0247
768	26.9743	17.8746	27.6243	22.4244	17.8746	23.3994	12.6747	21.7745	22.7494	12.6747
769	26.6493	18.1995	27.6243	22.4244	18.1995	23.3994	12.6747	21.7745	22.0994	12.3497
770	26.6493	18.1995	27.2993	22.7494	17.8746	23.3994	12.6747	21.4495	22.7494	12.3497
771	27.2993	17.8746	27.6243	22.7494	17.8746	23.0744	12.9997	21.7745	22.4244	12.3497
772	26.3243	18.5245	27.9493	22.4244	17.8746	23.7244	12.6747	21.7745	23.7244	12.3497
773	26.6493	18.1995	27.2993	23.0744	18.1995	23.3994	12.6747	21.4495	22.7494	12.6747
774	26.6493	18.5245	27.6243	22.4244	17.8746	23.0744	12.6747	21.4495	23.7244	12.3497
775	26.6493	18.5245	26.9743	22.7494	18.1995	23.0744	12.9997	21.1245	22.0994	12.3497
776	26.3243	17.8746	27.6243	23.3994	18.1995	23.0744	12.9997	21.4495	22.7494	12.0247
777	26.6493	17.8746	27.6243	22.4244	18.1995	23.3994	12.9997	21.4495	23.0744	12.6747
778	26.3243	18.1995	26.9743	23.0744	18.1995	23.3994	12.9997	21.4495	23.3994	12.3497
779	26.6493	18.1995	26.9743	23.0744	17.8746	23.3994	12.9997	21.7745	23.3994	12.3497
780	26.9743	17.8746	27.2993	22.7494	18.1995	23.3994	12.6747	21.1245	23.3994	12.3497
781	26.9743	17.5496	27.6243	22.7494	17.8746	23.3994	12.6747	21.1245	23.0744	12.6747
782	26.9743	18.5245	27.2993	22.4244	18.1995	23.3994	12.9997	20.7995	22.4244	11.6997
783	26.6493	18.1995	27.9493	22.7494	17.8746	23.3994	12.9997	20.7995	22.4244	12.9997
784	26.6493	18.8495	27.2993	22.7494	17.8746	23.3994	12.3497	21.7745	23.0744	12.6747
785	26.3243	19.1745	27.6243	22.0994	18.1995	23.0744	12.9997	20.7995	23.0744	12.6747
786	26.6493	18.8495	27.2993	22.0994	18.1995	22.7494	12.6747	20.7995	22.0994	12.3497
787	26.9743	18.8495	27.6243	22.4244	18.1995	23.3994	12.6747	21.7745	22.7494	12.3497
788	26.6493	18.8495	27.2993	22.7494	17.8746	23.3994	12.6747	21.7745	22.4244	12.3497
789	26.3243	19.1745	27.6243	22.0994	18.1995	23.3994	12.9997	21.1245	23.3994	12.0247
790	26.9743	18.8495	27.6243	22.4244	18.1995	23.7244	12.9997	21.7745	22.4244	12.6747
791	26.6493	18.5245	27.2993	23.0744	17.8746	23.3994	12.6747	21.1245	23.0744	12.6747
792	27.2993	18.8495	27.6243	22.4244	17.8746	23.3994	12.9997	21.7745	22.0994	12.6747
793	27.2993	19.1745	27.6243	22.7494	17.8746	23.3994	12.9997	21.4495	23.0744	12.0247
794	25.9994	18.5245	27.6243	22.7494	18.1995	23.3994	12.6747	21.7745	22.4244	12.0247
795	26.6493	18.8495	27.6243	22.7494	18.1995	23.0744	12.9997	21.4495	23.0744	12.3497
796	26.9743	18.8495	27.2993	22.4244	18.1995	23.3994	12.9997	21.4495	22.7494	12.3497
797	26.6493	19.1745	27.2993	22.7494	17.8746	23.7244	12.6747	21.4495	22.4244	12.6747
798	26.9743	18.8495	27.2993	22.4244	18.1995	23.3994	12.6747	22.0994	22.0994	12.3497
799	26.6493	18.8495	27.6243	22.4244	18.1995	23.3994	12.6747	21.7745	22.0994	12.3497
800	26.6493	18.8495	27.2993	21.7745	18.1995	23.3994	12.9997	21.1245	23.0744	12.6747
801	26.6493	18.5245	27.6243	22.4244	18.1995	23.3994	12.9997	21.4495	23.3994	12.6747
802	26.9743	18.8495	27.2993	23.0744	17.8746	23.0744	12.9997	21.4495	22.7494	12.0247
803	26.6493	18.1995	27.2993	23.0744	18.1995	23.7244	12.6747	21.4495	22.4244	12.3497
804	26.3243	18.8495	26.9743	22.0994	18.1995	23.3994	12.9997	21.1245	22.7494	12.0247
805	26.6493	19.1745	27.2993	22.0994	18.1995	23.3994	12.9997	21.4495	22.0994	12.3497
806	26.3243	18.8495	27.2993	22.4244	17.8746	23.3994	12.9997	21.4495	22.4244	12.6747
807	26.6493	18.8495	27.6243	22.0994	17.8746	23.3994	12.9997	21.4495	22.4244	12.3497
808	26.6493	18.8495	27.6243	22.7494	18.1995	23.3994	12.9997	21.7745	23.0744	12.0247
809	27.2993	18.8495	27.9493	22.7494	18.5245	23.0744	12.6747	21.7745	23.0744	12.6747
810	26.9743	18.5245	27.6243	22.7494	18.1995	23.3994	12.9997	21.4495	23.3994	12.0247
811	26.6493	18.8495	27.9493	22.7494	18.1995	23.3994	12.6747	21.7745	22.0994	12.3497
812	26.3243	18.8495	27.6243	22.7494	18.1995	23.0744	12.9997	21.7745	22.4244	12.3497
813	26.6493	18.5245	27.2993	22.7494	18.1995	23.7244	12.6747	21.4495	22.7494	12.0247
814	26.6493	18.5245	27.6243	22.7494	17.8746	23.0744	12.9997	21.7745	23.3994	12.0247
815	26.3243	18.5245	26.9743	22.7494	18.1995	23.7244	12.9997	21.7745	22.0994	12.3497
816	26.3243	18.5245	27.2993	22.7494	18.5245	23.0744	12.9997	21.7745	22.4244	12.3497
817	25.9994	18.8495	27.2993	23.0744	18.1995	23.7244	12.9997	21.7745	22.4244	12.0247
818	26.9743	18.1995	27.6243	22.0994	18.1995	23.7244	12.9997	21.7745	23.3994	12.3497
819	27.2993	18.5245	27.2993	23.0744	18.5245	23.0744	12.9997	21.7745	22.4244	12.6747
820	27.2993	18.5245	27.9493	22.4244	18.1995	23.3994	12.6747	21.7745	22.0994	12.3497
821	26.6493	18.8495	27.6243	22.7494	17.8746	23.0744	13.3247	21.7745	22.0994	12.3497
822	26.3243	19.1745	26.9743	22.7494	18.1995	23.3994	12.9997	22.0994	23.0744	12.3497
823	26.6493	18.5245	27.6243	22.7494	17.8746	23.3994	13.3247	21.7745	22.0994	12.3497
824	26.9743	18.5245	27.2993	22.4244	18.1995	23.3994	12.9997	21.1245	22.4244	12.3497
825	26.9743	18.8495	27.9493	22.7494	18.1995	23.0744	12.9997	21.7745	22.4244	12.0247
826	26.9743	18.5245	27.9493	22.7494	17.8746	23.3994	12.9997	21.4495	22.0994	12.3497
827	26.3243	18.5245	27.9493	22.4244	18.1995	23.3994	12.9997	21.7745	22.4244	12.3497
828	26.3243	18.8495	27.2993	22.7494	18.1995	23.3994	13.3247	21.7745	22.0994	12.3497
829	25.9994	18.5245	27.2993	23.0744	18.1995	23.3994	12.9997	22.0994	21.4495	12.6747
830	26.9743	18.8495	27.6243	22.7494	17.8746	23.3994	12.9997	21.4495	21.4495	12.3497
831	26.3243	18.5245	27.2993	22.7494	17.8746	23.3994	13.6497	21.7745	22.4244	12.3497
832	26.3243	18.8495	27.2993	22.4244	17.8746	23.3994	13.3247	22.0994	22.7494	12.3497
833	26.3243	18.8495	27.2993	22.7494	17.8746	23.3994	12.6747	22.0994	21.7745	12.3497
834	26.6493	18.8495	27.6243	22.7494	18.5245	23.0744	12.9997	21.7745	21.7745	12.3497
835	26.9743	18.5245	27.6243	23.0744	18.1995	23.3994	12.9997	21.7745	21.7745	12.3497
836	26.3243	18.8495	27.6243	22.7494	18.1995	23.0744	13.6497	21.1245	21.7745	12.3497
837	26.6493	18.8495	27.2993	22.4244	18.1995	23.7244	12.9997	21.4495	22.7494	12.6747
838	26.6493	18.1995	27.2993	22.0994	18.1995	23.0744	12.9997	21.4495	22.4244	12.0247
839	26.6493	18.8495	26.9743	22.4244	17.8746	23.0744	12.9997	21.4495	22.4244	12.0247
840	26.6493	18.8495	27.6243	22.0994	17.8746	23.3994	13.6497	21.1245	22.4244	12.3497
841	27.2993	19.1745	26.9743	22.7494	18.1995	23.3994	12.6747	21.4495	22.4244	12.3497
842	26.9743	18.5245	27.2993	22.0994	17.8746	22.7494	13.6497	21.1245	22.0994	12.3497
843	26.6493	18.8495	27.6243	22.7494	18.1995	23.0744	12.6747	21.1245	23.3994	12.3497
844	26.9743	18.5245	26.9743	22.0994	17.8746	23.0744	12.9997	21.7745	23.0744	12.3497
845	26.6493	18.8495	27.2993	22.7494	18.1995	23.3994	13.3247	20.7995	22.7494	12.6747
846	26.6493	18.5245	27.6243	22.7494	17.8746	23.3994	12.9997	21.1245	22.4244	12.3497
847	26.9743	18.5245	27.2993	22.0994	18.1995	23.3994	13.3247	21.7745	22.7494	12.3497
848	27.2993	18.8495	27.9493	22.7494	18.1995	23.3994	12.6747	21.4495	22.7494	11.6997
849	26.6493	18.5245	27.2993	22.7494	18.1995	23.3994	12.9997	21.4495	23.0744	12.3497
850	26.9743	18.5245	27.6243	22.7494	17.8746	23.3994	12.9997	21.4495	23.0744	12.0247
851	26.3243	18.8495	26.9743	22.7494	18.1995	23.0744	12.6747	21.1245	22.7494	12.3497
852	26.3243	18.8495	27.2993	22.4244	18.1995	23.3994	13.3247	21.4495	22.0994	12.6747
853	26.6493	18.8495	27.2993	22.4244	18.1995	23.3994	12.9997	21.4495	21.7745	12.0247
854	26.3243	18.8495	27.2993	22.7494	18.1995	23.3994	12.6747	21.1245	22.7494	12.3497
855	26.9743	18.8495	27.2993	22.4244	17.8746	23.7244	12.6747	21.4495	21.7745	12.3497
856	26.6493	18.8495	27.6243	22.7494	18.1995	23.0744	13.3247	21.4495	22.7494	12.6747
857	26.6493	18.8495	27.6243	22.4244	18.1995	23.7244	12.9997	21.7745	23.0744	12.9997
858	26.6493	18.8495	27.6243	22.0994	18.1995	23.3994	12.9997	21.7745	23.7244	12.0247
859	27.6243	19.1745	27.2993	22.7494	17.8746	23.7244	12.6747	21.4495	23.3994	12.6747
860	26.9743	19.1745	27.6243	22.0994	17.5496	23.0744	12.9997	22.0994	22.4244	12.3497
861	26.6493	18.8495	27.6243	22.0994	17.8746	23.0744	12.6747	21.7745	23.3994	12.0247
862	25.9994	18.5245	27.2993	23.0744	18.1995	23.7244	12.9997	21.7745	21.1245	12.3497
863	27.2993	18.5245	27.2993	22.0994	17.5496	23.3994	12.3497	22.0994	22.4244	12.3497
864	26.3243	18.8495	27.2993	22.0994	17.8746	23.3994	13.3247	22.0994	22.7494	12.3497
865	27.2993	18.8495	27.6243	22.7494	17.8746	23.3994	12.6747	21.7745	23.0744	12.3497
866	26.3243	18.5245	27.6243	22.4244	18.1995	23.3994	13.3247	21.7745	22.7494	12.3497
867	26.3243	18.8495	27.6243	22.4244	18.1995	23.0744	12.9997	21.4495	22.0994	12.3497
868	26.6493	19.1745	27.2993	22.4244	18.1995	23.3994	12.9997	21.7745	22.7494	12.0247
869	26.6493	18.5245	27.6243	22.0994	17.8746	23.0744	12.9997	21.7745	23.3994	12.3497
870	26.3243	18.8495	27.2993	22.4244	18.1995	22.7494	12.9997	21.7745	22.7494	12.3497
871	26.3243	18.8495	27.2993	22.7494	17.8746	23.3994	12.6747	22.0994	23.0744	12.3497
872	26.6493	19.4995	27.6243	22.4244	18.5245	23.3994	12.6747	21.7745	22.7494	12.0247
873	26.6493	18.8495	26.9743	22.4244	18.1995	23.0744	12.9997	22.0994	23.0744	12.3497
874	26.3243	18.8495	26.9743	22.4244	18.1995	23.3994	13.3247	21.7745	22.7494	12.3497
875	25.9994	19.1745	26.9743	22.4244	18.1995	23.3994	13.3247	21.7745	23.3994	12.3497
876	26.6493	18.8495	26.9743	22.4244	18.1995	23.3994	12.6747	21.1245	21.7745	12.3497
877	26.6493	18.8495	27.2993	22.4244	18.1995	23.3994	13.3247	21.7745	22.4244	12.6747
878	26.9743	18.8495	26.9743	22.0994	17.8746	23.0744	13.3247	21.7745	21.7745	12.3497
879	26.9743	18.8495	27.2993	22.0994	17.8746	23.7244	13.3247	21.7745	22.7494	12.0247
880	27.2993	18.8495	27.6243	21.7745	17.8746	23.7244	12.9997	21.7745	21.4495	12.0247
881	26.9743	18.8495	27.2993	22.0994	18.1995	23.3994	12.9997	21.7745	22.7494	12.6747
882	26.6493	18.8495	27.2993	22.4244	17.8746	23.7244	12.6747	21.7745	22.4244	12.6747
883	26.6493	18.8495	27.2993	21.7745	17.8746	23.3994	13.3247	21.7745	21.7745	11.6997
884	26.6493	18.5245	27.2993	22.4244	17.8746	23.3994	12.9997	21.4495	21.7745	12.3497
885	27.2993	18.8495	26.9743	22.0994	17.8746	23.3994	13.6497	21.4495	22.7494	12.3497
886	26.3243	18.8495	26.9743	22.4244	17.8746	23.7244	13.9747	21.4495	22.7494	12.3497
887	26.9743	18.8495	26.9743	22.4244	17.8746	23.3994	13.3247	21.4495	21.7745	12.3497
888	26.9743	18.1995	26.9743	22.7494	17.8746	24.0494	13.6497	21.4495	23.3994	12.3497
889	26.6493	18.5245	27.2993	22.0994	17.8746	23.7244	12.9997	21.7745	24.0494	12.6747
890	26.9743	18.8495	27.2993	22.4244	17.8746	23.3994	13.3247	21.7745	21.7745	12.3497
891	26.3243	18.5245	26.9743	22.4244	17.8746	23.7244	13.3247	21.4495	22.0994	12.6747
892	26.9743	18.5245	26.9743	22.0994	17.8746	24.0494	12.9997	21.4495	22.4244	12.3497
893	26.3243	18.8495	26.9743	22.4244	17.8746	23.7244	12.9997	21.4495	23.3994	12.3497
894	26.9743	18.8495	26.9743	22.0994	17.8746	23.7244	12.9997	21.4495	22.7494	12.3497
895	26.6493	18.5245	26.9743	21.7745	17.8746	23.0744	12.9997	21.4495	22.7494	12.3497
896	27.6243	18.8495	26.9743	22.0994	17.8746	23.3994	12.9997	21.4495	22.7494	12.3497
897	26.6493	18.8495	26.9743	21.7745	17.8746	23.3994	12.9997	21.7745	22.4244	12.6747
898	26.6493	18.1995	27.2993	22.4244	17.5496	23.7244	12.6747	21.7745	23.0744	12.3497
899	26.9743	18.5245	27.2993	22.4244	17.5496	23.3994	13.3247	22.0994	22.7494	12.3497
900	26.9743	18.8495	26.9743	21.7745	17.8746	23.7244	12.9997	21.4495	23.3994	12.6747
901	27.2993	18.5245	26.9743	22.0994	17.8746	23.7244	12.9997	21.7745	23.0744	12.3497
902	26.6493	18.5245	27.2993	22.4244	17.5496	23.7244	13.3247	21.7745	23.3994	12.3497
903	26.3243	18.5245	27.2993	21.7745	17.8746	23.7244	13.3247	22.0994	22.0994	12.3497
904	27.2993	18.5245	27.2993	21.7745	17.8746	23.3994	13.6497	21.7745	23.3994	12.3497
905	26.6493	18.5245	27.2993	22.0994	17.8746	23.3994	13.3247	21.7745	23.3994	12.0247
906	26.6493	18.5245	26.9743	22.0994	17.8746	24.0494	12.9997	21.7745	23.3994	12.3497
907	26.3243	18.5245	26.9743	22.4244	17.5496	23.3994	12.9997	22.0994	22.0994	12.9997
908	26.6493	18.5245	27.2993	22.0994	17.8746	23.3994	12.9997	21.7745	22.7494	12.3497
909	26.3243	18.5245	26.6493	22.0994	17.8746	23.7244	12.6747	21.7745	23.3994	12.0247
910	27.2993	18.5245	26.9743	22.0994	18.1995	23.7244	12.9997	21.7745	22.4244	12.6747
911	26.6493	18.8495	26.9743	22.4244	17.8746	23.7244	12.6747	21.7745	22.0994	12.3497
912	25.9994	18.5245	27.2993	21.7745	17.8746	23.3994	12.6747	21.7745	23.0744	12.3497
913	26.9743	18.5245	26.9743	22.4244	17.5496	23.7244	12.9997	21.7745	21.7745	12.6747
914	25.9994	18.8495	26.9743	21.7745	17.8746	23.7244	12.9997	22.0994	22.0994	12.6747
915	26.6493	18.8495	26.6493	21.7745	17.5496	24.0494	12.6747	21.7745	22.7494	12.3497
916	26.9743	18.1995	26.9743	21.7745	17.5496	24.0494	12.6747	21.4495	22.4244	12.3497
917	26.3243	18.5245	26.9743	21.7745	17.5496	23.7244	12.6747	22.0994	22.7494	12.6747
918	26.3243	18.5245	27.6243	22.4244	17.5496	23.7244	12.6747	21.4495	22.4244	12.3497
919	26.6493	18.5245	27.2993	22.0994	17.8746	23.7244	12.6747	21.7745	22.7494	12.3497
920	26.3243	18.8495	27.6243	21.4495	17.5496	23.3994	12.9997	21.7745	23.0744	12.0247
921	26.9743	18.5245	27.2993	21.7745	17.8746	23.7244	12.6747	21.4495	23.3994	12.9997
922	26.9743	18.5245	27.2993	22.4244	17.5496	23.7244	12.9997	21.7745	22.4244	12.3497
923	26.6493	18.5245	26.9743	22.0994	17.8746	23.3994	12.6747	21.7745	22.4244	12.3497
924	26.6493	18.5245	26.9743	21.7745	17.8746	23.7244	12.9997	22.0994	21.7745	12.0247
925	26.3243	18.1995	26.9743	21.4495	17.5496	23.3994	12.3497	21.7745	22.0994	12.3497
926	26.9743	18.8495	26.9743	22.0994	17.8746	23.7244	12.6747	22.0994	23.7244	12.3497
927	26.3243	18.5245	26.9743	22.0994	17.5496	23.3994	12.6747	21.7745	22.0994	12.0247
928	27.9493	18.5245	27.2993	21.7745	17.8746	23.3994	13.6497	22.0994	22.0994	12.6747
929	26.9743	17.8746	27.2993	21.7745	17.5496	24.0494	12.6747	21.7745	23.0744	12.3497
930	25.9994	18.8495	26.9743	22.4244	18.1995	23.7244	12.9997	21.7745	22.0994	12.3497
931	26.6493	18.8495	27.2993	21.4495	17.8746	23.7244	12.9997	21.7745	23.0744	12.6747
932	26.6493	18.5245	26.9743	21.7745	17.8746	23.7244	12.6747	22.4244	22.0994	12.3497
933	26.3243	18.5245	27.2993	21.7745	17.8746	23.7244	12.6747	22.7494	22.0994	12.0247
934	26.6493	18.1995	26.9743	21.7745	17.5496	23.3994	12.0247	22.7494	22.7494	12.0247
935	26.6493	18.8495	26.9743	21.7745	17.2246	23.7244	12.9997	22.4244	23.0744	12.0247
936	26.9743	18.8495	26.9743	21.4495	17.5496	23.7244	12.6747	22.4244	23.7244	12.6747
937	26.9743	18.1995	27.2993	22.0994	17.5496	23.7244	13.3247	21.7745	22.7494	12.3497
938	26.9743	18.5245	26.9743	22.0994	17.5496	23.7244	12.3497	22.0994	22.0994	12.6747
939	26.9743	18.5245	26.9743	21.7745	17.5496	23.3994	12.3497	22.4244	22.7494	12.3497
940	26.9743	18.1995	26.9743	21.7745	17.5496	24.0494	12.6747	22.0994	23.0744	12.3497
941	26.9743	18.5245	26.9743	22.0994	17.5496	23.7244	12.6747	22.4244	22.4244	12.0247
942	27.2993	18.5245	27.2993	22.4244	17.5496	23.3994	12.6747	22.4244	23.7244	12.3497
943	26.6493	18.8495	27.2993	22.0994	17.8746	23.3994	12.6747	22.4244	22.0994	12.6747
944	26.6493	18.5245	27.2993	21.7745	17.5496	23.7244	12.3497	22.4244	22.4244	12.0247
945	27.6243	18.5245	26.9743	21.7745	17.5496	23.3994	12.6747	21.7745	22.4244	12.3497
946	26.9743	18.8495	27.2993	21.7745	17.8746	23.7244	13.3247	21.4495	22.7494	12.6747
947	26.9743	18.8495	26.9743	22.0994	17.5496	23.3994	12.9997	21.1245	22.7494	12.0247
948	26.3243	18.5245	27.2993	22.0994	17.5496	23.7244	12.3497	20.4745	22.7494	12.3497
949	26.9743	18.5245	27.2993	21.7745	17.8746	24.0494	12.6747	21.7745	22.7494	12.0247
950	26.9743	18.5245	26.9743	22.0994	17.8746	23.3994	12.9997	22.0994	23.3994	12.3497
951	25.9994	18.8495	27.6243	21.7745	17.5496	23.3994	12.3497	21.4495	22.4244	12.6747
952	26.9743	18.1995	26.9743	22.0994	17.8746	23.7244	12.9997	21.1245	22.4244	12.6747
953	26.6493	18.8495	26.9743	22.0994	17.8746	23.7244	12.6747	21.4495	21.4495	12.6747
954	26.9743	18.5245	27.2993	22.0994	17.8746	23.7244	12.6747	21.7745	22.4244	12.3497
955	26.6493	18.5245	27.6243	21.7745	17.8746	24.0494	12.6747	21.7745	21.7745	12.3497
956	26.9743	18.5245	26.9743	21.7745	17.8746	23.3994	12.6747	21.1245	22.4244	12.0247
957	26.9743	19.1745	27.2993	22.0994	18.1995	23.7244	12.6747	22.0994	22.0994	12.0247
958	26.3243	18.8495	26.9743	22.0994	18.1995	23.0744	12.6747	21.7745	23.0744	12.3497
959	26.9743	18.8495	27.2993	21.7745	18.1995	24.0494	12.6747	22.0994	22.0994	12.3497
960	27.2993	19.1745	26.9743	21.7745	17.8746	23.7244	12.9997	22.0994	22.7494	12.0247
961	27.6243	19.1745	26.9743	21.7745	18.1995	23.3994	12.3497	22.0994	23.3994	12.3497
962	26.6493	18.8495	26.9743	22.0994	17.5496	23.7244	12.6747	21.7745	21.7745	12.6747
963	26.6493	18.8495	26.9743	21.4495	17.5496	23.7244	12.9997	22.4244	22.4244	12.3497
964	26.3243	19.4995	27.2993	22.0994	17.8746	23.3994	12.6747	22.0994	22.7494	12.3497
965	26.3243	18.8495	26.9743	21.7745	17.8746	23.3994	12.6747	22.0994	22.4244	12.6747
966	26.3243	18.8495	26.6493	21.7745	17.8746	23.7244	12.3497	22.4244	23.7244	12.6747
967	26.9743	19.1745	27.2993	22.0994	17.5496	23.7244	12.3497	21.7745	22.7494	12.3497
968	26.6493	18.5245	26.9743	21.7745	18.1995	23.7244	12.6747	21.7745	23.0744	12.0247
969	26.9743	19.1745	27.2993	21.7745	17.5496	23.3994	12.6747	22.0994	23.0744	12.6747
970	26.6493	18.5245	27.6243	22.0994	17.8746	23.7244	12.6747	22.0994	22.4244	12.3497
971	26.9743	19.4995	26.9743	21.4495	18.1995	24.3744	12.3497	21.7745	21.4495	12.3497
972	26.6493	18.8495	26.9743	21.7745	18.1995	23.7244	12.6747	22.0994	22.7494	12.3497
973	26.6493	18.8495	26.9743	21.7745	18.1995	23.7244	12.6747	22.0994	22.7494	12.3497
974	26.6493	18.8495	26.9743	22.0994	17.8746	23.7244	12.9997	22.4244	22.4244	12.3497
975	26.9743	19.1745	26.9743	21.4495	17.5496	23.3994	12.6747	22.4244	22.4244	12.0247
976	26.9743	18.8495	26.9743	21.4495	17.8746	23.3994	12.9997	22.0994	23.7244	12.6747
977	26.6493	18.8495	26.9743	21.4495	17.5496	24.0494	12.9997	21.7745	23.0744	12.3497
978	26.6493	18.8495	27.2993	21.7745	17.8746	24.0494	12.6747	22.0994	22.4244	12.6747
979	26.9743	18.5245	26.6493	21.7745	17.5496	23.7244	12.6747	22.0994	22.7494	12.3497
980	26.6493	18.8495	27.2993	21.7745	17.5496	23.3994	12.6747	21.4495	22.7494	12.6747
981	26.3243	18.8495	26.9743	22.0994	17.8746	24.0494	12.3497	21.7745	22.0994	12.6747
982	26.3243	18.5245	27.2993	21.7745	17.8746	23.3994	12.3497	21.7745	22.7494	12.6747
983	25.9994	18.5245	27.2993	21.4495	18.1995	23.7244	12.3497	21.7745	22.4244	12.6747
984	25.9994	18.8495	26.9743	21.7745	17.8746	23.7244	12.6747	22.0994	22.4244	12.3497
985	26.6493	18.8495	27.2993	21.7745	17.8746	23.7244	12.9997	22.0994	22.0994	12.3497
986	26.9743	18.8495	26.9743	21.7745	17.8746	23.7244	12.9997	22.0994	22.4244	12.3497
987	26.3243	18.8495	27.2993	22.0994	18.1995	23.3994	12.6747	21.7745	23.7244	12.0247
988	26.3243	18.8495	26.9743	21.7745	17.8746	23.3994	12.6747	22.4244	21.7745	12.3497
989	26.9743	18.8495	27.2993	21.7745	17.5496	23.7244	12.9997	22.0994	22.4244	12.3497
990	26.6493	18.8495	26.9743	21.7745	17.5496	23.3994	12.6747	22.0994	22.4244	12.3497
991	26.9743	19.1745	26.9743	21.4495	17.5496	23.7244	12.6747	21.7745	22.4244	12.3497
992	26.6493	19.1745	26.9743	22.4244	17.8746	23.7244	12.6747	22.0994	22.7494	12.3497
993	26.3243	19.1745	27.2993	21.7745	17.5496	23.3994	12.6747	22.0994	22.7494	12.6747
994	26.6493	18.8495	26.9743	21.7745	17.5496	23.3994	12.9997	21.7745	22.0994	12.6747
995	27.6243	18.8495	26.9743	21.7745	17.5496	23.3994	12.9997	22.0994	21.4495	12.3497
996	26.9743	19.4995	26.9743	22.0994	17.2246	23.3994	12.9997	22.0994	24.0494	12.3497
997	26.6493	18.8495	26.9743	21.7745	17.5496	23.7244	12.6747	22.0994	23.0744	12.6747
998	26.6493	19.1745	27.2993	21.7745	17.8746	24.0494	13.6497	22.0994	22.0994	12.3497
999	26.9743	19.1745	26.6493	22.0994	17.8746	23.3994	12.3497	22.0994	22.7494	12.3497
1000	26.6493	19.4995	26.6493	21.7745	17.5496	23.3994	12.3497	21.7745	22.7494	12.3497
1001	27.2993	19.1745	26.9743	22.0994	17.5496	23.7244	12.6747	21.7745	22.7494	12.3497
1002	26.3243	19.4995	26.9743	21.1245	17.8746	24.0494	12.6747	22.0994	23.0744	12.3497
1003	26.9743	19.8245	27.2993	21.7745	17.8746	24.0494	12.6747	21.7745	23.0744	12.6747
1004	26.6493	19.4995	27.2993	22.0994	17.5496	24.0494	12.9997	21.7745	22.4244	12.3497
1005	27.2993	19.8245	26.9743	21.1245	17.5496	23.3994	12.9997	21.7745	22.4244	12.6747
1006	27.6243	18.8495	27.6243	21.4495	17.5496	23.7244	12.6747	21.4495	23.3994	12.3497
1007	26.6493	19.1745	27.2993	21.7745	17.5496	23.7244	12.6747	21.7745	23.0744	12.3497
1008	26.6493	18.8495	27.2993	21.4495	17.5496	23.7244	12.3497	21.4495	22.0994	12.3497
1009	26.6493	18.5245	27.6243	21.7745	17.2246	23.3994	12.3497	22.0994	22.4244	12.3497
1010	26.6493	18.1995	27.6243	22.0994	17.5496	23.3994	12.6747	22.0994	22.7494	12.3497
1011	26.6493	18.1995	27.2993	21.4495	17.2246	23.3994	12.6747	22.0994	23.7244	12.3497
1012	26.9743	18.5245	27.2993	21.7745	17.5496	23.3994	12.6747	22.0994	22.0994	12.6747
1013	26.3243	18.8495	27.2993	22.0994	17.8746	23.7244	12.3497	22.0994	23.3994	12.3497
1014	26.9743	18.5245	27.2993	21.4495	17.5496	23.7244	12.6747	22.4244	23.3994	12.9997
1015	26.9743	18.1995	27.2993	21.4495	17.5496	23.3994	12.6747	22.0994	22.4244	12.3497
1016	26.3243	18.1995	27.2993	21.7745	17.2246	23.7244	12.6747	22.0994	23.0744	12.9997
1017	26.9743	18.1995	27.6243	21.7745	17.2246	23.7244	12.9997	22.0994	23.7244	12.6747
1018	26.9743	18.5245	27.6243	22.0994	16.8996	24.0494	12.3497	22.0994	22.7494	12.3497
1019	26.9743	18.8495	27.6243	21.4495	17.5496	23.7244	12.6747	22.0994	22.7494	12.3497
1020	26.6493	18.8495	27.2993	21.4495	17.5496	24.0494	12.9997	22.0994	23.0744	12.6747
1021	26.9743	18.5245	27.2993	21.4495	17.2246	23.7244	12.6747	22.4244	22.7494	12.3497
1022	26.6493	18.1995	27.6243	21.1245	17.8746	23.3994	12.6747	22.0994	22.4244	12.3497
1023	27.2993	19.1745	27.6243	22.0994	17.8746	24.0494	13.3247	21.7745	23.3994	12.3497
1024	26.9743	19.1745	27.2993	21.4495	17.2246	24.0494	12.9997	22.0994	23.3994	12.3497
1025	26.3243	19.4995	27.2993	22.0994	17.5496	24.0494	12.3497	22.0994	23.0744	12.3497
1026	25.6744	19.4995	27.2993	21.4495	17.5496	23.0744	12.3497	22.0994	23.7244	12.0247
1027	26.6493	18.8495	27.6243	21.4495	17.5496	22.7494	13.3247	21.4495	23.3994	12.0247
1028	26.6493	18.8495	27.6243	21.4495	17.5496	23.0744	13.3247	21.4495	23.0744	12.3497
1029	25.6744	18.5245	27.6243	21.7745	17.5496	23.0744	12.9997	22.0994	22.7494	12.3497
1030	26.6493	19.8245	27.6243	21.4495	17.5496	22.7494	12.6747	21.4495	23.3994	12.3497
1031	27.2993	19.1745	27.6243	21.4495	17.5496	23.0744	12.6747	21.4495	23.0744	12.3497
1032	26.6493	19.1745	27.6243	21.1245	17.5496	23.0744	12.6747	21.4495	22.4244	12.3497
1033	26.6493	19.1745	27.6243	22.0994	17.2246	23.3994	12.6747	21.4495	22.7494	12.3497
1034	26.6493	18.8495	27.6243	21.7745	17.2246	23.3994	12.6747	20.7995	22.0994	12.3497
1035	27.2993	19.1745	27.6243	21.7745	17.5496	22.7494	12.9997	21.1245	22.7494	12.3497
1036	26.9743	18.8495	27.2993	21.4495	17.5496	22.7494	12.9997	21.4495	23.3994	12.6747
1037	26.9743	18.8495	27.9493	21.4495	17.5496	22.7494	12.9997	21.7745	22.4244	12.3497
1038	25.9994	19.1745	27.6243	22.4244	17.5496	22.7494	12.6747	21.4495	22.7494	12.3497
1039	25.9994	19.1745	27.2993	21.4495	17.5496	23.0744	12.9997	21.4495	23.3994	12.6747
1040	25.9994	19.1745	27.2993	21.4495	17.5496	22.7494	12.6747	21.7745	23.3994	12.0247
1041	25.9994	18.8495	27.6243	21.1245	17.5496	22.7494	12.9997	21.4495	23.7244	12.3497
1042	25.9994	18.8495	27.6243	21.4495	17.5496	22.7494	12.6747	21.7745	22.7494	12.3497
1043	26.3243	19.8245	27.6243	21.4495	17.5496	22.7494	12.6747	22.0994	23.0744	12.6747
1044	26.3243	19.8245	27.6243	21.7745	17.5496	22.7494	12.3497	21.7745	22.7494	12.6747
1045	25.6744	18.1995	27.9493	21.4495	17.5496	22.7494	12.6747	22.0994	22.0994	12.3497
1046	25.3494	18.5245	27.6243	21.4495	17.5496	23.0744	13.3247	22.0994	22.4244	12.3497
1047	26.6493	19.4995	27.6243	21.4495	17.2246	22.7494	12.3497	22.0994	23.0744	12.3497
1048	25.6744	19.1745	27.6243	21.7745	17.5496	22.7494	12.3497	22.0994	23.0744	12.9997
1049	25.9994	19.4995	27.2993	21.4495	17.5496	22.7494	13.3247	22.4244	23.0744	12.3497
1050	25.6744	19.4995	27.2993	22.0994	17.5496	22.7494	12.9997	22.0994	23.0744	12.3497
1051	25.3494	19.4995	27.6243	22.0994	17.5496	23.0744	12.3497	21.7745	23.0744	12.3497
1052	26.3243	19.4995	27.6243	21.4495	17.5496	23.0744	12.9997	22.4244	23.7244	12.3497
1053	25.3494	19.1745	27.6243	21.7745	17.2246	22.7494	12.9997	22.4244	22.7494	12.6747
1054	25.9994	18.8495	27.6243	21.7745	17.5496	22.7494	13.3247	22.4244	23.0744	12.0247
1055	25.6744	18.8495	27.6243	21.4495	17.5496	23.0744	12.6747	22.4244	22.4244	12.6747
1056	25.6744	18.8495	27.6243	21.7745	17.5496	22.7494	12.9997	22.0994	23.7244	12.3497
1057	25.3494	18.8495	27.9493	21.4495	17.5496	22.7494	12.9997	22.4244	23.3994	12.3497
1058	25.3494	18.8495	27.2993	22.0994	17.5496	22.7494	12.9997	22.4244	23.3994	12.3497
1059	25.6744	18.5245	27.9493	21.7745	17.2246	22.7494	13.3247	22.4244	22.4244	12.6747
1060	25.3494	18.8495	27.6243	22.0994	17.5496	23.0744	12.6747	22.0994	23.3994	12.3497
1061	24.6994	19.1745	27.6243	22.0994	17.2246	22.7494	12.9997	22.4244	22.7494	12.3497
1062	25.0244	18.8495	27.2993	21.7745	17.5496	23.0744	12.9997	22.4244	23.0744	12.6747
1063	25.6744	18.8495	27.6243	22.0994	17.2246	22.7494	12.9997	22.0994	22.7494	12.0247
1064	25.9994	18.8495	27.6243	21.1245	17.5496	23.0744	12.9997	22.4244	22.4244	12.0247
1065	25.6744	18.5245	27.2993	21.7745	17.5496	23.0744	13.3247	22.4244	23.3994	11.6997
1066	24.6994	18.8495	27.6243	21.7745	17.2246	23.0744	13.3247	22.0994	23.0744	12.3497
1067	25.0244	18.5245	27.6243	21.4495	17.8746	23.0744	13.3247	22.4244	23.0744	12.0247
1068	25.6744	18.8495	27.6243	21.7745	17.5496	23.0744	12.6747	21.7745	22.7494	12.3497
1069	25.6744	18.1995	27.2993	22.0994	17.5496	22.7494	12.6747	22.4244	23.0744	12.0247
1070	25.3494	18.5245	27.6243	22.0994	17.2246	23.0744	12.6747	22.4244	23.0744	12.0247
1071	25.3494	18.8495	27.6243	21.7745	17.2246	22.7494	12.9997	22.4244	22.4244	12.6747
1072	25.6744	18.5245	27.6243	21.4495	17.2246	23.3994	12.9997	22.0994	22.0994	12.3497
1073	25.6744	18.5245	27.6243	21.4495	17.8746	23.0744	13.3247	22.0994	22.4244	12.3497
1074	25.3494	18.5245	27.6243	21.4495	17.2246	22.7494	12.6747	22.4244	22.7494	12.9997
1075	25.6744	18.5245	27.6243	21.4495	17.2246	23.0744	12.9997	22.0994	23.0744	12.3497
1076	25.0244	18.5245	27.6243	22.0994	17.2246	23.0744	12.9997	22.4244	22.4244	12.3497
1077	25.9994	18.5245	27.6243	21.4495	17.2246	23.0744	12.3497	22.0994	22.7494	12.6747
1078	25.9994	18.5245	27.6243	21.1245	17.2246	23.0744	12.3497	22.4244	22.4244	12.3497
1079	25.9994	18.5245	27.6243	21.7745	17.2246	22.7494	13.3247	22.0994	22.4244	12.6747
1080	25.0244	18.5245	27.6243	21.7745	17.2246	23.0744	13.3247	22.4244	22.7494	12.6747
1081	25.0244	18.5245	27.6243	21.4495	17.2246	22.7494	12.3497	22.4244	22.0994	12.3497
1082	25.9994	18.5245	27.6243	21.1245	17.2246	23.0744	12.6747	21.7745	23.7244	12.6747
1083	25.9994	18.8495	27.6243	21.4495	17.5496	23.0744	12.9997	22.4244	23.0744	12.3497
1084	25.3494	18.5245	27.6243	21.7745	17.5496	22.7494	13.3247	22.0994	23.3994	12.0247
1085	25.6744	18.8495	27.6243	21.4495	17.2246	23.0744	12.6747	22.4244	23.0744	12.6747
1086	25.0244	18.8495	27.6243	21.4495	17.2246	23.0744	12.3497	22.0994	22.7494	12.6747
1087	25.6744	18.8495	27.6243	22.7494	17.5496	23.0744	12.6747	22.0994	22.4244	12.0247
1088	25.6744	18.8495	27.6243	21.7745	17.2246	22.7494	12.6747	21.7745	23.0744	12.3497
1089	25.6744	18.8495	27.6243	21.1245	17.2246	22.7494	12.6747	22.0994	24.3744	12.0247
1090	26.3243	18.8495	27.2993	21.4495	16.8996	22.7494	12.6747	21.4495	22.7494	11.6997
1091	25.6744	19.1745	27.6243	21.4495	17.5496	23.0744	12.3497	22.0994	23.0744	12.0247
1092	25.3494	18.8495	27.6243	21.7745	16.8996	23.3994	12.9997	22.0994	22.7494	12.6747
1093	25.0244	18.8495	27.6243	21.7745	17.2246	22.7494	12.3497	22.0994	22.7494	12.9997
1094	25.3494	18.8495	27.6243	21.4495	17.5496	23.0744	12.6747	21.7745	23.3994	13.3247
1095	25.9994	19.1745	27.9493	22.4244	17.5496	23.0744	12.6747	22.0994	23.0744	12.3497
1096	25.6744	19.1745	27.2993	21.4495	17.5496	23.0744	12.3497	21.7745	22.7494	12.3497
1097	25.3494	18.8495	27.2993	21.4495	17.2246	22.7494	13.3247	21.7745	22.7494	12.3497
1098	25.9994	19.1745	27.6243	21.4495	17.2246	23.0744	12.6747	21.4495	23.3994	11.6997
1099	25.6744	19.4995	27.6243	21.7745	17.2246	23.0744	12.9997	22.4244	23.7244	12.3497
1100	25.0244	18.8495	27.9493	21.4495	17.5496	23.0744	12.6747	22.0994	23.0744	12.6747
1101	25.6744	18.8495	27.6243	21.1245	17.5496	23.0744	12.6747	22.0994	23.3994	12.3497
1102	25.6744	18.8495	27.2993	21.4495	17.2246	23.0744	13.6497	22.0994	22.4244	12.3497
1103	25.9994	18.8495	27.2993	21.7745	17.2246	23.0744	13.3247	21.7745	23.0744	12.3497
1104	25.3494	18.8495	27.2993	21.7745	17.2246	23.7244	13.3247	21.7745	23.0744	12.0247
1105	25.3494	19.1745	27.2993	21.7745	17.8746	22.7494	12.6747	21.7745	23.0744	11.6997
1106	25.0244	18.8495	27.2993	21.4495	17.2246	23.0744	12.9997	21.7745	23.0744	12.0247
1107	25.3494	18.5245	27.6243	21.7745	17.8746	23.0744	12.0247	22.0994	22.4244	12.3497
1108	25.6744	18.8495	27.2993	21.4495	17.2246	23.0744	12.9997	21.7745	23.0744	12.0247
1109	25.6744	18.8495	27.2993	21.1245	17.5496	22.7494	12.6747	21.7745	22.7494	12.3497
1110	25.3494	18.8495	27.6243	21.4495	17.8746	23.0744	12.9997	21.7745	22.7494	12.3497
1111	25.9994	18.5245	27.6243	21.4495	17.5496	22.7494	12.9997	22.0994	22.4244	12.0247
1112	25.6744	18.5245	27.6243	21.4495	17.2246	23.0744	12.6747	21.7745	23.7244	12.0247
1113	25.9994	18.8495	27.6243	21.4495	17.2246	23.0744	12.6747	22.0994	23.0744	12.0247
1114	25.3494	18.5245	27.6243	21.4495	17.2246	23.0744	12.9997	21.7745	23.3994	12.0247
1115	26.3243	18.1995	27.2993	21.4495	17.2246	23.3994	12.6747	21.7745	22.7494	12.0247
1116	25.6744	18.1995	27.9493	21.7745	17.2246	23.0744	12.6747	22.0994	22.4244	12.0247
1117	25.6744	18.1995	27.6243	21.1245	17.2246	23.0744	12.6747	21.7745	23.0744	12.0247
1118	26.3243	18.8495	27.6243	21.4495	17.5496	22.7494	12.6747	21.7745	22.0994	12.0247
1119	25.6744	18.1995	27.2993	21.1245	17.2246	22.7494	12.6747	21.7745	23.0744	12.0247
1120	25.3494	18.1995	27.6243	21.4495	17.5496	22.7494	12.6747	21.7745	22.4244	12.0247
1121	25.6744	17.8746	27.2993	21.4495	17.5496	23.0744	12.6747	21.7745	22.4244	12.3497
1122	25.6744	18.5245	27.9493	21.7745	17.2246	22.7494	12.9997	22.0994	22.7494	12.0247
1123	25.6744	18.5245	27.2993	21.7745	17.2246	23.0744	12.9997	21.7745	23.3994	12.3497
1124	25.6744	18.1995	27.6243	21.1245	17.5496	23.0744	13.6497	21.7745	23.0744	12.0247
1125	26.3243	18.5245	27.9493	21.1245	16.8996	23.0744	12.3497	21.4495	22.7494	11.6997
1126	25.6744	18.8495	27.6243	21.7745	17.5496	22.7494	12.9997	21.4495	23.0744	12.0247
1127	25.6744	18.1995	27.9493	21.7745	16.8996	23.0744	12.9997	21.7745	21.7745	12.0247
1128	26.6493	18.5245	27.9493	21.7745	17.8746	22.7494	12.3497	21.7745	23.0744	12.0247
1129	25.9994	18.1995	27.9493	21.4495	17.2246	23.3994	12.6747	21.7745	22.7494	12.0247
1130	25.3494	18.8495	27.9493	21.1245	17.2246	23.0744	12.6747	21.4495	23.7244	12.3497
1131	25.9994	18.1995	27.9493	21.4495	17.5496	23.0744	12.9997	21.7745	22.7494	11.6997
1132	25.6744	18.5245	27.6243	21.4495	17.5496	22.7494	12.9997	21.4495	23.3994	12.0247
1133	25.9994	18.5245	27.6243	21.4495	17.5496	23.0744	13.3247	22.0994	23.3994	12.3497
1134	25.0244	18.8495	27.9493	21.1245	17.2246	23.0744	12.6747	21.7745	23.3994	12.0247
1135	25.9994	18.5245	27.9493	21.4495	17.2246	22.7494	12.6747	21.7745	23.7244	12.0247
1136	25.9994	18.5245	27.6243	21.4495	17.5496	22.7494	12.6747	21.7745	23.0744	12.3497
1137	26.3243	18.8495	27.6243	21.1245	17.5496	22.7494	12.6747	21.7745	23.0744	12.0247
1138	25.9994	18.5245	27.9493	21.7745	17.2246	22.4244	12.9997	22.0994	23.7244	11.6997
1139	25.3494	18.8495	27.6243	21.1245	17.2246	23.0744	12.6747	22.0994	23.7244	12.0247
1140	25.6744	18.5245	27.6243	21.4495	17.2246	23.0744	12.6747	22.0994	22.4244	12.3497
1141	25.6744	18.5245	27.6243	21.4495	17.2246	23.0744	12.9997	21.7745	23.3994	12.0247
1142	25.6744	18.8495	27.2993	21.4495	16.8996	23.0744	12.9997	22.0994	22.7494	12.0247
1143	25.9994	18.8495	27.6243	21.1245	17.2246	23.0744	12.6747	21.7745	22.7494	12.0247
1144	25.6744	18.8495	27.6243	21.4495	16.8996	22.4244	13.3247	21.7745	23.0744	12.0247
1145	26.6493	18.8495	27.9493	21.4495	17.5496	22.7494	12.3497	22.0994	22.4244	11.6997
1146	25.6744	18.5245	27.9493	21.4495	16.8996	23.0744	12.6747	22.0994	22.0994	11.6997
1147	25.3494	18.5245	27.6243	21.4495	17.5496	23.0744	12.3497	22.0994	23.0744	12.0247
1148	25.6744	18.8495	27.9493	21.4495	17.2246	22.7494	12.6747	22.0994	22.4244	12.0247
1149	25.3494	18.8495	27.6243	21.4495	17.2246	23.0744	12.3497	22.0994	23.0744	12.0247
1150	25.9994	19.1745	27.6243	21.1245	17.2246	23.0744	12.3497	22.0994	23.3994	12.3497
1151	25.9994	18.5245	27.9493	21.7745	17.2246	22.7494	13.3247	22.0994	22.7494	12.0247
1152	25.0244	18.8495	27.9493	21.4495	16.8996	22.7494	12.6747	22.4244	23.0744	11.6997
1153	25.6744	19.1745	27.9493	21.7745	17.2246	23.0744	12.6747	22.0994	22.4244	12.0247
1154	25.9994	18.8495	27.9493	21.4495	17.2246	22.7494	12.3497	21.7745	23.3994	12.0247
1155	25.6744	18.5245	27.6243	21.4495	17.2246	22.7494	12.9997	22.0994	22.4244	11.6997
1156	26.6493	18.8495	27.9493	21.7745	16.2496	23.0744	12.3497	22.0994	22.4244	12.0247
1157	25.9994	18.5245	27.9493	21.4495	17.2246	23.0744	13.6497	22.0994	22.7494	12.3497
1158	26.3243	18.8495	27.9493	21.4495	17.2246	22.7494	13.3247	22.4244	22.0994	12.3497
1159	25.9994	18.5245	27.9493	22.0994	17.2246	22.4244	12.6747	22.0994	22.7494	12.3497
1160	25.3494	18.5245	27.6243	21.7745	16.8996	23.0744	13.6497	22.0994	23.0744	12.0247
1161	25.6744	18.8495	27.9493	21.7745	16.8996	22.7494	12.9997	22.0994	23.3994	12.0247
1162	25.6744	18.8495	27.6243	21.4495	17.2246	22.4244	12.6747	22.0994	22.7494	12.0247
1163	25.9994	18.8495	27.6243	21.1245	17.2246	22.4244	13.3247	21.7745	22.7494	11.6997
1164	25.9994	18.8495	27.9493	21.4495	16.5746	22.7494	12.3497	22.0994	22.4244	12.6747
1165	25.9994	18.8495	27.9493	21.1245	17.2246	22.7494	12.3497	22.4244	22.4244	12.0247
1166	25.6744	18.5245	27.6243	21.4495	17.2246	23.0744	12.6747	22.4244	23.7244	12.6747
1167	25.3494	18.5245	27.9493	21.1245	17.2246	22.7494	12.9997	22.4244	22.7494	12.0247
1168	25.9994	18.8495	27.2993	21.4495	17.2246	23.0744	12.9997	22.0994	22.4244	12.0247
1169	25.9994	18.8495	27.6243	20.7995	16.8996	23.0744	12.3497	22.4244	23.0744	12.3497
1170	25.9994	18.5245	27.9493	21.7745	17.2246	22.7494	12.9997	22.0994	22.7494	12.3497
1171	25.6744	18.8495	27.2993	21.7745	17.2246	22.7494	12.6747	22.0994	23.0744	12.0247
1172	26.3243	18.5245	27.6243	21.4495	17.2246	22.7494	12.9997	21.7745	22.7494	12.3497
1173	26.3243	18.8495	27.6243	22.4244	17.5496	22.7494	12.9997	21.7745	23.3994	12.0247
1174	25.6744	19.1745	27.9493	21.7745	17.2246	22.7494	12.6747	21.7745	23.3994	12.0247
1175	25.6744	18.5245	27.9493	21.1245	16.5746	22.4244	12.6747	22.0994	23.0744	12.0247
1176	25.9994	18.5245	27.6243	21.4495	16.8996	23.0744	12.9997	22.0994	22.4244	11.6997
1177	25.6744	19.1745	27.6243	21.4495	16.8996	22.7494	12.6747	21.7745	22.7494	11.6997
1178	25.9994	18.5245	27.6243	21.7745	17.2246	22.7494	12.3497	21.7745	22.4244	11.6997
1179	25.9994	18.5245	27.6243	21.1245	16.8996	22.7494	12.9997	21.4495	23.3994	12.0247
1180	25.9994	18.8495	27.9493	21.1245	16.8996	22.7494	12.9997	21.7745	23.7244	12.0247
1181	25.3494	18.5245	27.9493	21.4495	16.8996	22.7494	12.6747	21.7745	23.3994	12.3497
1182	25.9994	18.5245	27.6243	21.4495	16.5746	22.7494	13.3247	21.7745	24.0494	12.0247
1183	25.6744	18.8495	27.6243	21.1245	17.2246	22.7494	12.6747	22.0994	22.7494	12.0247
1184	25.6744	18.1995	27.9493	21.4495	16.5746	23.0744	12.6747	22.4244	22.7494	12.0247
1185	25.6744	18.5245	27.2993	21.4495	16.8996	22.7494	13.3247	22.4244	23.3994	12.3497
1186	26.6493	18.1995	27.2993	21.7745	17.2246	23.0744	12.3497	21.7745	22.0994	12.0247
1187	25.6744	18.5245	27.6243	21.7745	17.2246	22.7494	13.9747	22.0994	23.0744	11.6997
1188	26.3243	18.1995	27.2993	21.1245	16.8996	22.4244	12.6747	22.0994	23.0744	12.0247
1189	25.6744	18.8495	27.2993	21.1245	16.8996	22.7494	12.9997	22.0994	23.0744	12.0247
1190	25.9994	18.5245	27.6243	21.4495	16.8996	22.7494	13.3247	22.0994	22.7494	12.3497
1191	25.9994	19.1745	27.6243	21.1245	17.2246	22.7494	12.9997	22.0994	23.7244	12.0247
1192	25.9994	18.5245	27.6243	21.1245	16.8996	22.4244	12.9997	22.0994	22.0994	12.0247
1193	25.3494	18.5245	27.9493	21.1245	17.2246	23.0744	12.6747	21.7745	22.4244	12.0247
1194	25.9994	18.5245	27.6243	21.7745	16.8996	23.0744	12.6747	22.4244	22.7494	12.0247
1195	25.6744	18.5245	27.6243	21.1245	16.8996	23.0744	12.9997	22.4244	23.0744	12.0247
1196	25.9994	18.8495	27.6243	21.4495	16.8996	23.0744	12.6747	21.7745	22.0994	11.6997
1197	25.0244	18.5245	27.6243	21.7745	17.2246	22.7494	12.9997	22.0994	22.7494	12.0247
1198	25.6744	18.8495	27.2993	21.4495	16.8996	22.7494	12.6747	21.7745	23.0744	12.3497
1199	26.6493	18.5245	27.6243	21.4495	17.2246	22.4244	12.6747	21.7745	22.7494	12.0247
1200	25.6744	18.1995	27.6243	21.4495	17.2246	22.4244	12.3497	22.0994	22.7494	12.0247
1201	25.6744	18.5245	27.6243	21.1245	16.8996	22.7494	12.6747	21.4495	22.7494	12.6747
1202	25.3494	18.1995	27.9493	21.4495	17.2246	23.0744	12.6747	22.0994	22.4244	12.0247
1203	25.9994	18.1995	27.6243	21.4495	17.2246	22.4244	12.6747	21.4495	22.7494	12.3497
1204	25.6744	18.8495	27.6243	21.4495	16.5746	22.4244	12.9997	21.4495	22.7494	12.0247
1205	26.3243	18.1995	27.2993	21.1245	16.8996	22.4244	12.9997	22.4244	22.0994	12.0247
1206	26.3243	18.5245	27.6243	21.7745	16.8996	22.7494	13.3247	22.4244	21.7745	12.0247
1207	25.3494	17.8746	27.6243	21.1245	16.8996	23.0744	12.6747	22.4244	22.4244	11.6997
1208	25.6744	18.1995	27.6243	20.7995	16.8996	23.0744	12.6747	22.0994	22.0994	11.6997
1209	25.9994	18.1995	27.2993	21.7745	17.2246	22.7494	12.9997	22.0994	21.7745	12.0247
1210	26.3243	18.8495	27.6243	21.1245	17.2246	22.7494	12.9997	21.7745	22.4244	12.0247
1211	25.6744	18.1995	27.6243	21.4495	17.2246	23.0744	13.3247	22.0994	23.0744	12.0247
1212	25.3494	18.1995	27.6243	21.4495	16.8996	23.0744	12.6747	22.0994	21.7745	12.0247
1213	25.3494	18.5245	27.6243	21.1245	16.8996	22.7494	12.6747	22.0994	22.0994	11.6997
1214	25.3494	18.8495	27.6243	21.4495	16.8996	23.0744	12.6747	22.0994	22.4244	12.0247
1215	25.6744	18.5245	27.6243	21.7745	16.5746	23.0744	13.9747	21.7745	21.4495	11.6997
1216	25.3494	18.1995	27.6243	21.1245	16.8996	22.7494	13.3247	22.0994	21.7745	11.3747
1217	26.3243	18.5245	27.9493	21.4495	16.8996	23.0744	12.3497	21.7745	22.0994	12.0247
1218	26.3243	18.5245	27.6243	21.4495	16.5746	22.7494	12.9997	21.7745	22.0994	12.0247
1219	25.9994	18.1995	27.9493	21.1245	16.8996	23.0744	13.3247	22.0994	22.7494	12.3497
1220	25.6744	18.5245	27.6243	21.4495	16.8996	23.0744	12.6747	22.0994	21.4495	12.0247
1221	25.3494	18.1995	27.6243	21.7745	16.5746	22.7494	13.3247	22.0994	22.0994	12.0247
1222	26.3243	18.5245	27.6243	21.4495	16.5746	23.0744	12.6747	22.0994	22.4244	12.0247
1223	25.6744	18.5245	27.2993	20.4745	16.5746	22.7494	12.9997	21.7745	22.4244	11.6997
1224	25.9994	18.5245	27.6243	21.4495	16.5746	23.0744	12.9997	22.0994	22.4244	11.6997
1225	25.6744	19.1745	27.9493	21.1245	16.2496	22.7494	12.3497	22.0994	22.4244	11.3747
1226	25.6744	18.5245	27.6243	21.4495	17.2246	23.0744	12.9997	22.0994	22.7494	12.3497
1227	25.6744	18.1995	27.6243	21.4495	17.2246	23.0744	13.6497	22.0994	23.0744	12.0247
1228	25.6744	18.8495	27.6243	21.1245	17.2246	22.7494	12.6747	22.4244	22.7494	12.3497
1229	25.3494	18.8495	27.9493	21.4495	17.5496	23.0744	13.6497	22.0994	22.7494	12.3497
1230	25.9994	18.5245	27.9493	20.7995	17.2246	23.0744	12.3497	21.7745	22.0994	11.6997
1231	26.3243	18.5245	27.9493	21.7745	17.2246	23.0744	12.3497	22.4244	22.7494	12.0247
1232	25.9994	18.8495	27.6243	21.1245	17.2246	23.0744	12.9997	21.7745	22.0994	11.6997
1233	25.9994	18.5245	27.6243	21.4495	17.2246	22.7494	12.6747	22.0994	22.4244	12.0247
1234	25.6744	18.8495	27.6243	21.1245	17.2246	22.7494	12.9997	22.0994	22.7494	11.6997
1235	25.3494	18.5245	27.6243	20.7995	17.2246	22.7494	12.9997	21.7745	22.4244	12.0247
1236	25.6744	18.5245	27.9493	20.7995	17.5496	22.4244	13.3247	21.7745	23.3994	11.6997
1237	25.6744	18.8495	27.9493	21.1245	17.2246	22.7494	12.6747	22.0994	22.7494	11.6997
1238	25.9994	18.5245	27.6243	21.7745	17.2246	22.7494	13.3247	22.0994	22.7494	12.0247
1239	25.6744	18.1995	27.6243	21.7745	17.2246	22.7494	12.9997	22.0994	23.0744	11.6997
1240	25.0244	18.5245	28.2743	21.1245	17.2246	22.7494	12.6747	22.0994	23.0744	12.0247
1241	25.6744	18.5245	27.9493	20.7995	16.8996	23.0744	12.9997	22.0994	22.0994	11.6997
1242	25.3494	18.8495	27.6243	21.4495	17.2246	23.0744	12.6747	22.0994	21.7745	12.3497
1243	25.9994	18.5245	27.9493	21.4495	17.2246	22.7494	13.3247	22.0994	21.1245	12.3497
1244	25.6744	18.5245	27.9493	20.7995	17.2246	22.7494	12.9997	22.0994	22.4244	12.0247
1245	25.3494	18.5245	27.6243	20.4745	16.8996	22.7494	12.9997	22.0994	21.7745	12.3497
1246	25.6744	18.8495	27.9493	21.7745	17.2246	22.7494	13.3247	22.0994	22.7494	12.0247
1247	25.6744	18.5245	27.9493	21.1245	17.2246	22.7494	13.6497	22.0994	22.4244	11.6997
1248	26.3243	18.5245	27.9493	20.7995	17.2246	23.0744	12.6747	21.7745	22.7494	11.6997
1249	25.6744	18.1995	27.9493	21.1245	17.2246	22.7494	13.3247	22.0994	21.7745	11.6997
1250	25.9994	18.5245	27.9493	20.4745	17.2246	23.0744	12.9997	21.7745	21.7745	12.0247
1251	25.6744	18.1995	27.9493	21.7745	17.2246	22.7494	12.9997	22.0994	22.4244	12.0247
1252	25.6744	18.5245	27.9493	21.4495	16.8996	23.0744	13.6497	21.7745	22.0994	12.0247
1253	25.3494	18.8495	27.6243	21.1245	17.2246	22.7494	12.6747	22.0994	22.4244	11.6997
1254	25.6744	18.1995	27.6243	21.4495	16.8996	23.0744	12.9997	21.4495	23.0744	12.0247
1255	25.0244	18.1995	27.9493	21.1245	16.8996	22.4244	13.6497	21.7745	21.4495	12.6747
1256	25.3494	18.1995	27.9493	21.1245	16.8996	22.4244	12.6747	21.4495	22.7494	11.3747
1257	24.6994	18.8495	27.9493	20.7995	17.2246	23.0744	12.9997	21.7745	23.3994	12.3497
1258	26.3243	18.5245	27.9493	21.4495	17.2246	22.7494	12.9997	21.7745	22.7494	12.3497
1259	25.6744	18.1995	28.2743	21.1245	17.2246	22.7494	12.9997	21.7745	23.0744	12.0247
1260	25.6744	18.5245	27.6243	21.1245	17.2246	22.7494	13.3247	21.4495	22.4244	12.3497
1261	25.6744	18.5245	27.6243	20.7995	17.2246	23.0744	12.6747	21.4495	22.4244	12.0247
1262	25.9994	18.5245	28.2743	20.7995	17.2246	22.4244	12.6747	21.4495	22.4244	12.3497
1263	25.3494	18.1995	27.9493	20.7995	17.5496	22.7494	12.0247	21.1245	23.0744	12.3497
1264	25.6744	18.1995	27.9493	20.4745	17.2246	23.0744	13.3247	22.0994	23.0744	12.3497
1265	26.3243	18.5245	28.2743	20.7995	17.2246	22.4244	12.9997	21.4495	23.0744	12.3497
1266	25.9994	18.5245	28.2743	21.4495	17.2246	22.4244	12.9997	21.7745	21.7745	11.6997
1267	25.6744	18.8495	27.9493	21.1245	17.2246	23.0744	12.6747	21.7745	22.7494	11.6997
1268	25.9994	18.5245	27.6243	21.4495	17.2246	22.7494	12.6747	21.1245	23.0744	11.6997
1269	25.0244	18.8495	27.6243	19.8245	17.2246	23.0744	12.3497	21.4495	23.3994	12.0247
1270	25.0244	18.8495	27.9493	20.7995	17.2246	22.4244	13.3247	21.7745	22.4244	12.0247
1271	25.3494	18.8495	27.9493	20.7995	17.2246	23.0744	13.6497	21.4495	22.4244	12.6747
1272	25.6744	18.5245	28.2743	22.0994	17.2246	23.0744	12.9997	21.7745	22.7494	11.6997
1273	26.3243	18.8495	27.9493	21.7745	17.2246	22.7494	12.6747	22.0994	22.4244	12.3497
1274	25.9994	18.8495	27.9493	21.7745	17.2246	22.4244	12.9997	21.7745	22.7494	12.0247
1275	25.9994	18.8495	28.2743	20.7995	17.5496	22.4244	12.6747	22.0994	22.7494	12.3497
1276	25.3494	18.8495	27.9493	20.7995	17.2246	23.0744	13.3247	22.0994	22.4244	12.0247
1277	26.3243	18.8495	27.9493	21.1245	17.2246	22.7494	12.3497	21.7745	23.0744	12.0247
1278	25.6744	18.8495	27.6243	21.4495	17.5496	22.7494	12.9997	21.7745	22.4244	12.0247
1279	25.6744	19.1745	27.9493	20.7995	17.2246	23.0744	12.9997	21.7745	23.0744	12.0247
1280	25.9994	18.8495	28.2743	20.7995	17.5496	22.7494	13.6497	21.4495	22.7494	12.3497
1281	26.3243	18.8495	27.9493	21.4495	17.2246	23.0744	13.3247	21.4495	22.7494	12.0247
1282	25.9994	18.8495	27.9493	21.1245	16.8996	22.7494	13.3247	21.7745	23.0744	12.0247
1283	25.3494	18.8495	27.9493	21.7745	17.2246	22.7494	12.9997	21.1245	22.7494	12.0247
1284	25.0244	18.8495	27.9493	21.1245	16.8996	22.7494	13.6497	21.4495	22.4244	12.3497
1285	25.9994	18.8495	27.9493	21.1245	16.8996	22.7494	13.3247	21.4495	22.4244	12.0247
1286	25.3494	18.8495	27.9493	21.1245	17.2246	23.0744	13.3247	21.4495	21.7745	11.6997
1287	25.6744	18.8495	27.6243	21.1245	17.2246	23.0744	12.6747	21.7745	22.4244	12.3497
1288	25.6744	18.8495	27.9493	20.7995	17.2246	22.4244	13.6497	22.0994	23.0744	12.0247
1289	25.9994	18.8495	27.9493	21.1245	17.5496	22.7494	13.9747	21.7745	22.4244	12.0247
1290	25.6744	18.8495	27.9493	21.7745	17.2246	22.4244	13.6497	21.1245	22.4244	12.6747
1291	25.6744	18.8495	27.9493	21.1245	16.8996	22.7494	12.9997	21.7745	22.7494	12.0247
1292	25.9994	18.8495	27.9493	21.1245	17.2246	22.7494	13.3247	21.4495	22.4244	12.3497
1293	25.6744	19.1745	27.9493	21.4495	17.2246	22.7494	13.3247	21.7745	22.4244	12.0247
1294	25.9994	18.8495	28.2743	21.1245	17.2246	23.0744	13.3247	21.7745	22.0994	12.0247
1295	25.9994	18.8495	27.9493	21.4495	17.2246	22.4244	13.3247	21.4495	22.7494	12.0247
1296	25.9994	18.8495	27.9493	20.7995	16.8996	22.7494	13.3247	21.7745	22.0994	12.3497
1297	25.9994	18.5245	28.2743	21.7745	17.2246	22.7494	13.6497	21.4495	21.4495	12.0247
1298	25.6744	18.8495	27.6243	21.1245	17.5496	22.4244	12.6747	21.1245	21.4495	12.0247
1299	25.9994	18.8495	27.9493	21.1245	16.8996	22.4244	13.3247	21.4495	21.7745	12.3497
1300	25.6744	19.4995	27.9493	20.7995	17.2246	22.7494	12.6747	22.0994	22.7494	12.0247
1301	25.6744	19.4995	27.9493	21.4495	16.8996	23.0744	12.3497	21.4495	22.4244	12.3497
1302	25.9994	19.8245	27.9493	21.4495	17.2246	23.0744	12.6747	20.7995	23.0744	12.3497
1303	25.6744	19.1745	27.9493	21.1245	17.2246	22.0994	13.3247	22.0994	21.7745	12.0247
1304	25.6744	19.4995	27.9493	20.7995	17.2246	22.7494	12.9997	21.4495	21.7745	12.0247
1305	25.9994	19.8245	27.9493	21.1245	16.8996	23.0744	12.9997	21.4495	22.0994	11.6997
1306	25.9994	19.4995	27.9493	21.4495	16.8996	22.7494	13.3247	21.4495	23.3994	12.0247
1307	25.6744	19.4995	27.9493	21.1245	17.2246	23.0744	13.3247	21.1245	21.7745	12.0247
1308	25.6744	19.4995	28.2743	21.1245	17.2246	22.7494	12.6747	21.1245	22.7494	12.3497
1309	25.3494	19.1745	28.2743	21.7745	17.5496	22.7494	12.9997	21.7745	21.7745	12.0247
1310	26.3243	19.4995	27.9493	21.4495	16.8996	22.7494	12.9997	21.4495	22.7494	12.0247
1311	25.6744	19.4995	27.6243	21.1245	17.2246	22.7494	12.9997	22.4244	22.7494	12.0247
1312	25.9994	19.8245	27.9493	20.7995	16.8996	23.0744	12.9997	22.0994	22.4244	11.6997
1313	25.6744	19.4995	27.6243	21.1245	17.5496	22.4244	13.3247	21.4495	22.4244	12.0247
1314	25.6744	19.4995	28.2743	21.1245	16.8996	22.7494	12.9997	21.4495	22.0994	12.3497
1315	25.6744	19.4995	27.6243	20.7995	17.2246	23.0744	12.6747	21.4495	22.4244	12.3497
1316	25.9994	19.4995	27.9493	20.7995	16.8996	23.0744	12.6747	21.1245	21.7745	12.3497
1317	25.6744	19.4995	27.9493	21.1245	16.8996	23.0744	12.9997	21.4495	23.0744	12.0247
1318	25.9994	19.1745	27.9493	21.4495	16.8996	23.0744	13.3247	21.4495	22.0994	12.0247
1319	26.6493	19.8245	27.9493	20.1495	16.8996	22.7494	12.6747	21.7745	22.0994	12.0247
1320	25.6744	19.1745	27.9493	21.1245	17.2246	22.4244	12.3497	21.1245	22.0994	12.0247
1321	25.6744	19.1745	27.9493	20.7995	17.2246	22.7494	12.6747	21.7745	23.3994	12.3497
1322	25.6744	19.1745	27.9493	20.4745	17.5496	22.7494	12.9997	21.4495	22.0994	12.0247
1323	25.9994	19.1745	27.9493	20.7995	16.8996	22.7494	13.6497	21.7745	22.0994	12.0247
1324	25.9994	19.4995	27.9493	20.4745	17.2246	23.0744	12.9997	21.4495	22.4244	12.0247
1325	25.6744	19.4995	28.2743	21.1245	17.2246	22.7494	12.3497	21.7745	23.3994	11.6997
1326	25.6744	19.1745	27.9493	21.1245	16.8996	22.4244	12.3497	22.0994	23.0744	12.0247
1327	25.9994	19.1745	27.6243	20.4745	17.2246	22.7494	13.3247	21.7745	22.7494	12.3497
1328	25.6744	19.1745	27.6243	20.7995	17.2246	23.0744	12.0247	21.7745	22.7494	12.3497
1329	25.3494	18.8495	27.6243	20.7995	16.8996	22.7494	12.6747	22.0994	22.0994	11.6997
1330	25.9994	19.4995	27.6243	20.7995	17.2246	23.0744	12.9997	22.0994	21.7745	12.0247
1331	25.6744	19.1745	27.2993	21.4495	16.8996	22.7494	12.3497	22.0994	23.0744	12.0247
1332	25.6744	19.1745	27.6243	21.4495	16.8996	23.0744	12.9997	22.0994	22.7494	12.0247
1333	25.6744	18.8495	27.9493	21.4495	17.2246	22.7494	12.9997	22.0994	22.0994	12.0247
1334	25.9994	19.1745	27.6243	21.1245	16.8996	22.7494	12.3497	22.0994	20.7995	12.0247
1335	25.3494	19.1745	27.9493	20.7995	17.2246	22.7494	12.6747	22.0994	23.0744	12.0247
1336	26.3243	19.1745	27.9493	21.1245	17.2246	22.7494	12.3497	22.0994	22.7494	12.3497
1337	26.6493	19.1745	27.9493	20.7995	16.8996	23.0744	12.9997	21.7745	23.0744	12.0247
1338	25.3494	18.8495	27.2993	19.8245	16.8996	23.0744	12.3497	21.4495	23.3994	12.0247
1339	25.9994	18.5245	27.6243	21.1245	16.8996	22.7494	12.6747	21.7745	21.7745	11.6997
1340	26.3243	18.8495	27.9493	20.4745	16.8996	22.4244	13.3247	21.7745	22.0994	12.0247
1341	25.6744	18.8495	27.6243	20.7995	16.8996	23.0744	12.9997	21.7745	22.4244	11.6997
1342	25.6744	19.1745	27.6243	20.7995	17.2246	22.7494	12.9997	21.7745	21.4495	12.0247
1343	25.6744	18.8495	27.6243	20.7995	16.8996	23.0744	12.9997	21.4495	23.3994	12.0247
1344	25.6744	19.1745	27.6243	20.7995	16.8996	23.0744	12.3497	21.4495	22.0994	11.6997
1345	25.3494	19.1745	27.6243	20.4745	16.8996	23.0744	12.6747	21.7745	23.0744	11.6997
1346	25.9994	19.1745	27.6243	20.7995	16.8996	22.7494	12.9997	21.7745	23.7244	11.6997
1347	25.6744	19.1745	27.6243	20.4745	16.8996	23.0744	12.9997	21.7745	22.7494	12.0247
1348	25.3494	18.5245	27.9493	21.4495	16.8996	22.7494	12.0247	21.7745	22.4244	12.0247
1349	25.6744	18.8495	27.9493	20.7995	16.8996	22.4244	12.3497	22.0994	23.0744	12.0247
1350	25.6744	19.1745	27.9493	21.1245	16.8996	22.7494	12.6747	22.0994	22.7494	12.0247
1351	25.3494	18.8495	27.6243	20.4745	16.8996	22.7494	12.3497	22.0994	22.7494	12.0247
1352	25.9994	19.1745	27.6243	21.1245	16.8996	22.7494	13.3247	22.0994	22.4244	12.0247
1353	25.9994	18.8495	27.9493	21.1245	16.8996	23.0744	12.3497	22.0994	22.7494	11.6997
1354	25.6744	19.1745	27.9493	20.4745	17.2246	23.0744	12.6747	22.0994	22.0994	12.0247
1355	25.6744	19.1745	27.9493	21.4495	16.8996	22.7494	12.6747	21.7745	21.7745	11.6997
1356	25.9994	18.8495	27.9493	21.1245	17.2246	22.7494	12.3497	22.0994	21.4495	12.0247
1357	25.6744	18.8495	27.9493	21.1245	16.8996	23.0744	12.6747	21.7745	23.0744	11.6997
1358	25.9994	19.1745	27.9493	21.4495	17.2246	22.7494	12.3497	22.0994	22.4244	12.0247
1359	25.9994	18.8495	27.6243	20.1495	17.2246	22.7494	12.9997	21.7745	22.0994	12.0247
1360	25.6744	19.1745	27.6243	20.4745	16.8996	22.7494	12.6747	22.0994	23.3994	12.0247
1361	25.9994	19.1745	27.6243	19.8245	16.8996	23.0744	12.3497	22.0994	22.4244	12.3497
1362	25.6744	19.1745	27.6243	21.1245	16.8996	22.7494	12.9997	22.0994	22.7494	11.6997
1363	25.6744	19.1745	27.2993	21.1245	16.8996	23.0744	12.0247	21.4495	22.4244	11.6997
1364	25.9994	19.1745	27.9493	21.1245	16.8996	23.0744	12.3497	21.7745	22.7494	11.6997
1365	25.6744	18.8495	28.2743	20.7995	17.2246	22.7494	12.3497	22.0994	22.7494	12.3497
1366	26.3243	18.8495	27.9493	20.4745	17.5496	22.7494	12.3497	22.0994	23.0744	12.0247
1367	25.3494	18.8495	27.9493	21.4495	17.2246	22.4244	12.9997	22.4244	22.0994	12.3497
1368	26.3243	18.8495	28.2743	21.1245	17.2246	22.7494	12.3497	22.0994	22.0994	12.3497
1369	25.3494	19.1745	27.9493	20.7995	17.2246	22.7494	12.6747	21.7745	22.4244	12.0247
1370	26.3243	19.1745	27.9493	20.7995	17.2246	23.0744	12.6747	22.0994	22.7494	12.0247
1371	26.6493	19.1745	27.6243	20.7995	17.2246	22.7494	12.9997	22.0994	22.0994	11.6997
1372	25.0244	18.8495	27.6243	21.7745	17.2246	23.0744	12.3497	22.0994	22.0994	11.6997
1373	25.6744	19.4995	27.9493	21.1245	16.8996	22.7494	12.3497	22.0994	22.0994	12.3497
1374	25.3494	19.8245	27.6243	20.4745	17.2246	23.0744	12.9997	22.0994	22.7494	12.0247
1375	25.6744	19.4995	27.9493	19.8245	17.5496	22.7494	12.6747	21.7745	21.1245	12.0247
1376	26.6493	19.8245	27.9493	20.4745	17.5496	22.7494	12.3497	22.0994	22.7494	12.3497
1377	25.9994	19.8245	27.9493	21.1245	17.2246	22.7494	12.0247	22.0994	21.7745	11.3747
1378	26.6493	19.8245	27.9493	21.1245	17.2246	22.7494	12.9997	21.7745	21.4495	12.0247
1379	25.6744	19.4995	27.6243	21.1245	17.5496	22.7494	13.3247	22.0994	20.4745	12.0247
1380	25.6744	19.1745	27.9493	20.4745	17.5496	22.7494	12.6747	21.7745	21.4495	12.3497
1381	25.9994	19.8245	27.9493	20.4745	17.2246	23.0744	12.9997	22.4244	22.7494	11.6997
1382	25.9994	19.4995	27.6243	20.4745	17.2246	22.7494	12.6747	22.4244	22.0994	12.0247
1383	25.3494	19.4995	27.9493	20.7995	17.2246	23.0744	12.9997	22.0994	21.7745	12.0247
1384	25.3494	19.8245	27.6243	20.1495	17.2246	22.7494	12.3497	21.7745	22.0994	12.0247
1385	25.6744	19.4995	27.9493	20.4745	17.2246	22.7494	12.6747	22.0994	22.7494	11.6997
1386	26.3243	19.8245	27.9493	20.4745	17.2246	22.7494	12.3497	21.7745	23.3994	12.0247
1387	25.6744	19.4995	27.9493	20.1495	17.5496	22.7494	12.3497	22.0994	22.4244	11.6997
1388	26.3243	19.4995	27.6243	20.1495	16.8996	22.7494	12.3497	21.7745	23.0744	12.3497
1389	25.9994	19.8245	27.6243	20.7995	17.2246	23.0744	12.6747	21.4495	21.1245	12.0247
1390	25.9994	19.8245	27.6243	21.1245	17.2246	23.0744	12.9997	22.0994	21.7745	12.0247
1391	25.6744	19.4995	27.9493	20.1495	17.2246	22.7494	12.6747	21.7745	22.0994	12.3497
1392	25.9994	19.4995	27.6243	20.4745	17.2246	22.7494	12.3497	22.0994	21.7745	12.3497
1393	26.3243	19.1745	27.9493	19.8245	17.5496	22.7494	12.9997	21.4495	22.0994	12.3497
1394	25.9994	19.4995	27.9493	20.1495	16.8996	22.7494	12.3497	22.0994	22.0994	12.3497
1395	25.6744	19.8245	27.9493	20.4745	17.2246	23.0744	12.3497	21.4495	23.0744	11.6997
1396	26.9743	19.4995	27.9493	20.4745	17.2246	23.0744	11.6997	22.0994	22.4244	12.0247
1397	25.6744	19.4995	27.6243	20.4745	17.2246	22.7494	13.3247	22.0994	22.7494	11.6997
1398	25.9994	19.8245	27.9493	19.8245	17.2246	23.0744	12.0247	22.0994	22.0994	12.3497
1399	25.3494	19.8245	27.9493	20.7995	17.2246	22.7494	11.6997	22.0994	21.4495	12.0247
1400	25.0244	19.8245	27.9493	20.1495	17.2246	23.3994	12.0247	22.0994	21.7745	12.0247
1401	25.3494	19.4995	27.9493	21.1245	17.2246	22.7494	12.6747	21.7745	22.4244	12.0247
1402	25.6744	19.4995	27.6243	21.1245	17.2246	23.0744	12.3497	21.7745	21.4495	12.0247
1403	26.6493	19.4995	27.6243	20.7995	17.2246	23.0744	12.6747	21.4495	22.7494	12.6747
1404	26.6493	19.4995	27.6243	20.4745	17.2246	22.7494	12.0247	22.0994	21.7745	12.0247
1405	25.6744	19.4995	27.6243	20.4745	17.2246	22.7494	12.0247	22.0994	21.4495	12.3497
1406	26.3243	19.4995	27.9493	20.7995	17.2246	22.7494	12.9997	22.0994	21.4495	12.0247
1407	26.3243	19.4995	27.9493	20.7995	17.5496	22.7494	13.6497	22.0994	22.0994	12.0247
1408	25.9994	19.4995	27.9493	20.4745	17.5496	22.7494	12.0247	22.0994	22.7494	12.3497
1409	26.6493	19.4995	28.2743	20.4745	17.5496	22.7494	12.3497	22.0994	22.0994	12.0247
1410	26.3243	19.1745	27.6243	20.7995	17.2246	22.7494	12.0247	21.7745	21.4495	12.6747
1411	26.3243	19.4995	27.9493	20.1495	17.2246	23.0744	12.9997	21.7745	21.1245	12.0247
1412	26.3243	19.1745	27.9493	20.4745	17.2246	22.7494	12.0247	21.7745	22.0994	12.0247
1413	26.3243	19.4995	27.6243	20.4745	17.2246	22.7494	11.6997	22.0994	22.0994	12.0247
1414	25.6744	19.8245	27.9493	20.1495	17.2246	22.7494	12.6747	22.0994	22.7494	12.0247
1415	25.6744	19.4995	27.6243	20.4745	17.2246	22.7494	12.3497	22.4244	22.4244	11.6997
1416	25.6744	19.4995	27.6243	20.4745	17.5496	22.7494	12.0247	22.4244	21.1245	12.3497
1417	25.0244	19.1745	27.9493	20.7995	17.2246	22.7494	12.6747	22.4244	22.4244	12.0247
1418	25.6744	19.4995	27.6243	21.1245	17.5496	22.7494	11.3747	22.0994	21.7745	12.3497
1419	24.6994	19.1745	27.6243	19.8245	17.2246	23.3994	12.6747	22.0994	22.4244	12.0247
1420	25.0244	19.1745	27.6243	20.1495	17.2246	22.4244	12.6747	22.0994	21.4495	12.0247
1421	26.3243	19.4995	27.6243	20.7995	17.2246	22.7494	12.0247	22.0994	21.4495	11.6997
1422	26.3243	19.4995	27.6243	20.7995	17.2246	23.0744	13.3247	21.7745	22.0994	12.3497
1423	25.9994	19.1745	27.9493	20.4745	17.2246	22.7494	12.9997	22.4244	21.4495	12.0247
1424	26.6493	19.4995	28.2743	20.7995	17.5496	22.4244	13.3247	22.0994	20.7995	12.0247
1425	26.6493	19.4995	27.9493	20.7995	17.2246	23.0744	12.9997	22.0994	23.3994	11.6997
1426	26.3243	18.8495	27.9493	20.4745	17.2246	23.0744	13.3247	21.7745	21.7745	11.3747
1427	25.9994	19.1745	27.9493	20.7995	17.2246	22.7494	12.9997	22.0994	21.1245	12.3497
1428	26.3243	19.1745	27.9493	20.4745	17.2246	22.7494	12.9997	22.0994	22.4244	12.6747
1429	26.3243	19.1745	27.9493	20.1495	17.5496	23.0744	12.6747	22.4244	22.4244	12.0247
1430	26.6493	19.4995	27.9493	20.1495	17.2246	23.0744	12.0247	21.7745	21.4495	12.0247
1431	26.6493	19.4995	27.9493	21.1245	17.2246	23.0744	12.6747	22.0994	22.4244	12.0247
1432	26.3243	18.8495	27.9493	20.1495	16.8996	22.7494	12.3497	22.0994	21.7745	12.3497
1433	26.3243	19.1745	27.9493	20.4745	17.2246	22.7494	12.6747	22.4244	22.7494	12.0247
1434	25.9994	19.1745	27.6243	19.4995	17.2246	23.0744	12.3497	21.7745	20.7995	12.0247
1435	26.3243	19.1745	27.9493	20.4745	17.5496	23.0744	12.3497	22.0994	22.7494	11.6997
1436	26.3243	19.1745	27.6243	20.4745	17.2246	22.7494	12.6747	22.0994	22.0994	12.3497
1437	26.3243	18.8495	27.9493	20.4745	17.2246	23.0744	12.6747	22.0994	21.7745	12.6747
1438	26.3243	19.1745	27.6243	20.7995	16.8996	23.0744	13.3247	21.7745	20.4745	12.0247
1439	26.3243	18.8495	28.5993	20.7995	17.5496	22.4244	12.6747	22.0994	21.7745	12.3497
1440	25.6744	19.1745	27.9493	20.7995	17.2246	23.0744	12.6747	22.4244	21.1245	12.3497
1441	26.3243	19.4995	27.9493	20.7995	17.2246	23.3994	12.9997	22.0994	21.7745	12.3497
1442	26.3243	18.8495	27.6243	20.4745	17.2246	22.7494	12.6747	22.4244	22.4244	12.0247
1443	26.3243	19.1745	27.9493	20.4745	17.2246	23.3994	12.6747	22.4244	21.4495	12.0247
1444	26.3243	19.1745	27.9493	20.7995	17.2246	22.7494	12.6747	21.7745	21.4495	12.0247
1445	26.3243	19.4995	27.9493	20.7995	16.8996	23.0744	12.6747	22.0994	21.7745	12.0247
1446	26.9743	19.1745	27.9493	20.4745	17.2246	22.7494	12.6747	22.0994	21.4495	12.0247
1447	26.6493	19.1745	28.2743	20.4745	17.8746	23.0744	11.6997	22.0994	22.7494	12.0247
1448	25.9994	19.1745	27.9493	20.4745	17.2246	23.0744	12.6747	22.0994	21.4495	12.3497
1449	26.3243	18.8495	27.9493	20.7995	17.2246	22.4244	12.6747	22.0994	22.0994	11.6997
1450	26.3243	18.8495	28.2743	20.7995	17.2246	23.0744	13.3247	22.4244	21.7745	12.3497
1451	25.9994	19.4995	27.6243	20.7995	17.5496	22.7494	12.6747	22.0994	22.0994	12.3497
1452	26.3243	19.4995	27.9493	20.1495	17.2246	22.4244	11.6997	22.0994	21.7745	12.3497
1453	26.3243	19.1745	28.2743	20.4745	17.2246	22.4244	12.3497	22.0994	21.7745	11.6997
1454	26.3243	19.8245	28.2743	21.1245	17.2246	22.7494	12.3497	22.0994	22.0994	12.0247
1455	26.9743	19.8245	28.2743	20.4745	17.5496	23.0744	12.6747	21.7745	21.4495	12.3497
1456	26.3243	19.1745	28.2743	20.1495	17.5496	23.0744	12.3497	21.7745	21.1245	12.0247
1457	26.3243	19.4995	27.9493	20.4745	17.2246	22.7494	13.3247	22.0994	21.4495	12.3497
1458	26.3243	19.1745	27.9493	20.7995	17.5496	22.7494	12.6747	21.7745	22.7494	11.6997
1459	26.3243	19.4995	27.9493	20.7995	17.2246	22.7494	12.6747	22.0994	21.4495	12.3497
1460	26.6493	19.8245	27.9493	20.7995	17.2246	23.0744	12.9997	22.0994	21.7745	12.3497
1461	25.9994	19.8245	28.2743	20.7995	17.2246	22.7494	12.6747	21.7745	22.0994	11.6997
1462	26.3243	19.1745	27.9493	20.1495	17.2246	23.0744	12.6747	21.7745	22.0994	12.0247
1463	26.3243	18.8495	27.9493	20.7995	17.5496	23.0744	12.9997	21.7745	22.4244	12.0247
1464	25.9994	19.1745	27.9493	20.7995	17.5496	23.0744	12.6747	21.4495	22.4244	12.0247
1465	26.3243	18.8495	27.9493	20.4745	17.8746	22.7494	12.3497	21.7745	22.4244	12.0247
1466	25.9994	19.1745	27.9493	20.1495	17.2246	23.0744	12.3497	21.4495	21.7745	12.3497
1467	26.3243	19.4995	28.2743	20.4745	17.2246	22.7494	12.3497	21.7745	21.4495	11.6997
1468	26.3243	18.8495	27.9493	20.7995	17.5496	23.0744	12.6747	22.0994	21.7745	12.0247
1469	26.6493	19.4995	27.9493	21.1245	17.2246	22.7494	12.6747	22.0994	21.7745	11.6997
1470	26.6493	18.8495	27.9493	20.1495	17.2246	22.4244	12.3497	21.7745	21.1245	12.0247
1471	26.3243	19.4995	27.9493	19.8245	17.5496	23.0744	12.0247	21.4495	22.4244	12.3497
1472	26.3243	19.4995	27.6243	20.4745	17.2246	22.4244	12.6747	21.7745	21.4495	12.0247
1473	26.3243	19.1745	27.6243	20.7995	17.8746	23.0744	12.0247	22.0994	21.1245	12.6747
1474	26.3243	19.4995	27.9493	20.4745	17.2246	23.0744	12.6747	21.4495	21.4495	11.6997
1475	26.3243	18.8495	27.9493	20.4745	17.5496	23.0744	12.0247	21.7745	21.1245	12.3497
1476	26.6493	19.4995	27.9493	20.4745	16.8996	23.0744	12.6747	21.7745	21.4495	11.6997
1477	26.6493	19.8245	27.6243	20.7995	17.5496	23.0744	12.6747	22.0994	20.4745	11.6997
1478	25.9994	19.1745	27.6243	20.7995	17.2246	23.0744	12.3497	21.7745	22.0994	12.3497
1479	25.6744	19.4995	27.9493	21.1245	17.2246	23.0744	12.3497	21.7745	22.0994	11.6997
1480	26.3243	19.1745	27.9493	20.7995	17.5496	23.0744	12.3497	22.0994	21.4495	12.0247
1481	25.9994	19.4995	27.9493	20.7995	17.2246	23.0744	12.3497	22.4244	21.7745	12.0247
1482	26.3243	19.1745	27.9493	20.7995	17.5496	22.7494	12.6747	22.0994	22.0994	12.0247
1483	26.6493	19.4995	27.9493	20.4745	17.5496	22.7494	12.3497	21.7745	22.7494	12.3497
1484	26.3243	19.4995	27.9493	19.8245	17.5496	22.7494	12.6747	22.0994	21.7745	12.0247
1485	25.9994	19.1745	27.9493	20.4745	17.5496	23.3994	12.0247	22.4244	20.7995	11.3747
1486	25.6744	19.1745	27.9493	20.7995	17.5496	22.7494	12.3497	21.7745	21.4495	11.6997
1487	26.6493	19.1745	27.9493	20.1495	17.2246	22.7494	12.3497	22.4244	21.7745	11.6997
1488	25.9994	18.8495	27.9493	20.4745	17.2246	23.0744	12.6747	21.7745	21.1245	11.6997
1489	26.6493	19.1745	27.9493	20.7995	17.5496	22.7494	12.3497	21.7745	20.7995	12.0247
1490	25.9994	19.1745	28.2743	20.4745	17.5496	22.7494	12.3497	22.0994	22.0994	11.6997
1491	26.3243	19.4995	27.9493	20.1495	17.5496	23.0744	12.6747	22.0994	22.4244	12.0247
1492	26.6493	19.1745	27.9493	20.1495	17.5496	23.0744	12.3497	22.4244	22.4244	12.6747
1493	26.6493	19.1745	28.2743	20.4745	17.2246	23.0744	12.3497	22.0994	22.4244	11.6997
1494	26.3243	19.1745	27.9493	20.4745	17.5496	22.7494	12.9997	22.4244	23.3994	12.0247
1495	26.6493	19.8245	27.9493	19.8245	17.5496	23.0744	12.0247	22.0994	22.7494	12.0247
1496	25.9994	19.4995	28.2743	20.4745	16.8996	23.0744	12.3497	22.0994	21.4495	12.0247
1497	26.3243	19.8245	27.9493	20.1495	17.5496	23.0744	12.6747	22.4244	22.0994	12.0247
1498	26.3243	19.1745	27.6243	20.1495	17.2246	22.7494	12.6747	21.7745	21.7745	11.3747
1499	26.6493	19.1745	27.6243	20.1495	17.5496	23.3994	12.6747	22.0994	22.0994	11.6997
1500	26.3243	19.1745	27.6243	20.1495	17.2246	22.7494	12.6747	22.4244	21.7745	11.6997
1501	26.6493	19.4995	27.6243	20.1495	17.2246	23.0744	11.3747	22.7494	21.7745	12.0247
1502	25.6744	19.1745	27.6243	19.8245	17.5496	23.0744	12.3497	22.4244	20.7995	12.0247
1503	25.9994	19.1745	27.6243	20.7995	17.2246	23.0744	12.9997	22.4244	21.4495	11.3747
1504	26.3243	19.1745	27.6243	20.1495	17.2246	22.7494	12.0247	22.4244	20.7995	11.6997
1505	26.3243	19.8245	27.9493	20.1495	17.5496	22.7494	12.3497	22.7494	20.7995	12.0247
1506	26.3243	19.1745	27.6243	20.1495	16.8996	23.0744	12.3497	22.0994	22.4244	12.3497
1507	26.6493	19.8245	27.6243	19.8245	17.2246	23.0744	12.3497	22.7494	21.4495	12.6747
1508	25.9994	19.1745	27.9493	19.8245	16.8996	23.0744	12.0247	22.0994	20.4745	12.0247
1509	26.3243	19.4995	27.6243	20.1495	16.8996	23.3994	12.0247	22.4244	21.4495	12.3497
1510	26.6493	19.4995	27.6243	20.4745	17.2246	23.0744	12.6747	22.4244	21.1245	12.3497
1511	25.9994	19.4995	27.6243	20.1495	17.2246	22.7494	12.0247	22.4244	20.7995	12.0247
1512	25.9994	19.1745	27.9493	19.8245	16.8996	23.3994	12.3497	22.4244	21.4495	12.0247
1513	26.3243	19.1745	27.9493	20.1495	17.2246	23.0744	12.3497	21.7745	21.1245	12.3497
1514	26.3243	18.8495	27.6243	20.4745	16.8996	22.7494	12.6747	21.7745	22.7494	12.6747
1515	25.9994	19.1745	27.9493	20.4745	17.2246	22.7494	12.3497	22.0994	21.7745	12.0247
1516	26.6493	19.4995	27.6243	20.4745	17.2246	23.0744	12.0247	22.0994	21.7745	12.3497
1517	25.9994	19.8245	27.6243	20.4745	17.2246	22.7494	12.3497	22.4244	21.4495	12.0247
1518	25.9994	19.8245	27.9493	19.8245	17.2246	22.7494	12.3497	22.0994	21.7745	11.6997
1519	26.3243	19.8245	27.9493	20.7995	16.8996	23.0744	12.6747	21.7745	20.7995	12.0247
1520	26.6493	19.4995	27.6243	20.4745	16.8996	22.7494	12.3497	21.7745	23.0744	12.3497
1521	26.3243	19.8245	27.6243	20.4745	17.2246	22.7494	12.0247	21.7745	21.7745	12.3497
1522	25.9994	19.4995	27.6243	20.7995	17.2246	23.0744	11.6997	22.0994	21.1245	12.6747
1523	26.3243	19.4995	27.6243	20.1495	16.8996	23.0744	11.6997	22.4244	21.4495	12.0247
1524	25.9994	19.4995	27.9493	19.8245	17.2246	23.3994	11.6997	22.0994	22.4244	12.0247
1525	26.3243	19.4995	27.6243	19.4995	17.2246	22.7494	12.3497	21.1245	20.4745	12.3497
1526	25.9994	19.4995	27.9493	19.8245	17.2246	23.0744	12.0247	21.1245	22.0994	11.6997
1527	26.3243	19.4995	27.6243	20.7995	17.2246	22.7494	12.3497	22.0994	21.4495	12.0247
1528	25.9994	19.4995	27.6243	20.1495	16.8996	23.0744	12.6747	22.0994	22.7494	12.3497
1529	26.3243	19.8245	27.9493	20.4745	17.2246	23.0744	12.3497	21.7745	23.3994	11.3747
1530	25.9994	19.1745	27.9493	19.8245	17.2246	22.7494	12.3497	22.0994	21.7745	12.3497
1531	26.3243	19.8245	27.6243	19.8245	17.5496	22.7494	12.9997	22.0994	21.1245	11.6997
1532	25.9994	19.4995	27.6243	20.1495	17.2246	23.0744	12.9997	21.7745	23.0744	12.3497
1533	25.9994	19.4995	27.9493	20.7995	17.5496	22.7494	12.3497	22.0994	21.7745	11.6997
1534	26.9743	19.8245	27.9493	20.1495	16.8996	23.0744	12.0247	22.0994	22.4244	12.3497
1535	26.3243	19.4995	27.9493	20.1495	17.5496	22.7494	11.6997	22.0994	21.7745	12.0247
1536	26.6493	19.4995	27.6243	20.4745	17.2246	22.7494	12.3497	22.0994	21.7745	12.0247
1537	26.6493	19.4995	27.6243	20.4745	17.5496	23.0744	12.0247	22.0994	21.7745	11.6997
1538	26.3243	19.4995	27.6243	20.4745	17.5496	23.0744	12.0247	21.7745	22.0994	11.3747
1539	25.9994	19.4995	27.9493	19.8245	17.2246	23.0744	13.3247	21.4495	21.7745	12.0247
1540	25.9994	19.4995	27.9493	19.8245	17.2246	22.7494	12.0247	21.4495	21.7745	12.0247
1541	26.6493	19.1745	27.9493	20.7995	17.2246	23.0744	12.3497	21.4495	21.1245	11.6997
1542	26.6493	19.4995	27.6243	20.4745	17.2246	22.7494	11.6997	22.4244	21.7745	11.6997
1543	26.9743	19.4995	27.6243	20.1495	17.2246	22.7494	12.3497	22.0994	21.4495	12.3497
1544	26.3243	19.4995	27.9493	20.1495	17.2246	22.7494	12.3497	21.7745	21.7745	12.0247
1545	26.6493	19.8245	27.6243	19.8245	17.2246	22.7494	12.3497	22.4244	21.4495	12.0247
1546	25.6744	19.1745	27.6243	19.8245	17.5496	23.0744	12.6747	22.0994	21.7745	12.0247
1547	25.9994	19.4995	27.9493	19.4995	16.8996	23.0744	12.6747	21.7745	23.3994	12.0247
1548	26.6493	19.4995	27.6243	20.4745	17.2246	23.0744	12.3497	22.0994	22.4244	12.3497
1549	26.3243	19.8245	27.9493	20.7995	17.2246	22.7494	12.3497	21.4495	21.7745	12.3497
1550	26.6493	19.4995	27.6243	20.1495	17.2246	22.4244	12.3497	21.1245	22.4244	12.0247
1551	26.3243	19.8245	27.6243	20.4745	16.8996	22.7494	12.6747	21.4495	22.0994	11.6997
1552	25.9994	19.4995	27.6243	20.4745	17.5496	22.4244	11.6997	22.0994	21.4495	12.3497
1553	26.3243	19.8245	27.6243	20.1495	16.8996	22.7494	12.0247	22.0994	22.0994	12.6747
1554	26.6493	19.4995	27.9493	20.7995	16.8996	23.0744	12.6747	21.4495	21.7745	12.0247
1555	25.9994	19.4995	27.6243	20.1495	17.5496	22.7494	12.6747	21.4495	22.7494	11.6997
1556	26.3243	19.1745	27.6243	20.1495	16.8996	22.7494	12.6747	21.7745	21.4495	12.0247
1557	26.3243	19.4995	27.6243	20.4745	17.2246	22.4244	11.6997	21.7745	23.0744	12.0247
1558	26.3243	19.1745	27.6243	20.1495	16.8996	22.7494	12.0247	21.4495	22.4244	11.3747
1559	26.6493	19.4995	27.9493	20.4745	17.2246	22.7494	12.3497	21.4495	22.4244	11.3747
1560	25.9994	19.4995	27.9493	20.4745	17.2246	23.3994	12.3497	21.4495	21.4495	11.6997
1561	25.9994	19.4995	27.2993	20.4745	17.2246	22.0994	12.6747	22.0994	21.7745	11.3747
1562	26.3243	19.4995	27.6243	20.4745	17.2246	22.4244	12.0247	21.7745	21.4495	11.3747
1563	26.3243	19.4995	27.6243	20.4745	17.2246	23.0744	12.6747	21.4495	21.4495	11.0497
1564	26.6493	19.8245	27.6243	20.1495	17.2246	22.7494	12.3497	21.7745	21.7745	11.3747
1565	25.6744	19.4995	27.6243	20.1495	17.5496	22.4244	12.3497	21.4495	22.7494	11.3747
1566	25.9994	19.1745	27.9493	19.8245	16.8996	22.7494	12.3497	21.4495	22.0994	11.6997
1567	26.3243	19.8245	27.9493	20.1495	17.2246	22.7494	12.6747	21.7745	21.4495	11.3747
1568	26.6493	19.1745	27.9493	20.1495	16.8996	22.7494	12.3497	22.0994	22.0994	11.3747
1569	26.9743	19.4995	27.2993	19.8245	17.2246	23.0744	12.6747	22.0994	21.4495	11.3747
1570	25.9994	19.4995	27.6243	19.4995	16.8996	23.0744	12.9997	21.7745	21.7745	11.6997
1571	26.3243	19.4995	27.6243	20.1495	17.2246	22.7494	12.9997	22.0994	23.0744	11.6997
1572	25.9994	19.1745	27.6243	20.4745	17.2246	22.7494	12.3497	22.0994	22.4244	11.3747
1573	25.9994	19.4995	27.2993	20.1495	17.5496	23.0744	12.3497	22.0994	21.7745	11.3747
1574	25.6744	19.4995	27.6243	20.4745	16.8996	23.0744	12.9997	22.0994	22.7494	11.3747
1575	26.3243	19.4995	27.2993	19.8245	16.8996	22.7494	12.6747	21.7745	21.4495	11.3747
1576	26.6493	19.4995	27.6243	20.1495	17.2246	22.7494	12.9997	21.7745	21.1245	11.6997
1577	26.3243	19.4995	27.6243	20.7995	17.2246	23.0744	12.3497	22.4244	22.4244	11.3747
1578	26.3243	19.4995	27.6243	20.1495	16.8996	22.7494	12.9997	21.7745	21.7745	11.3747
1579	25.9994	18.8495	27.6243	20.4745	17.5496	23.0744	12.0247	21.4495	21.4495	11.0497
1580	26.3243	19.1745	27.6243	20.1495	16.8996	22.4244	12.6747	21.7745	21.7745	10.7247
1581	26.3243	19.1745	27.6243	20.1495	16.8996	23.0744	12.3497	21.7745	22.4244	11.3747
1582	26.3243	19.1745	27.9493	20.1495	17.2246	22.7494	12.9997	21.7745	22.4244	11.3747
1583	26.6493	19.1745	27.6243	20.4745	17.2246	22.4244	12.3497	21.4495	22.7494	11.0497
1584	26.3243	19.4995	27.6243	19.4995	17.5496	23.0744	12.9997	22.0994	22.0994	11.3747
1585	26.6493	19.1745	27.6243	20.1495	16.8996	22.7494	12.3497	21.7745	22.7494	11.0497
1586	26.3243	19.4995	27.6243	19.8245	17.8746	22.7494	12.9997	21.7745	21.7745	11.3747
1587	26.3243	19.4995	27.9493	20.1495	16.5746	22.7494	12.3497	21.4495	22.0994	11.3747
1588	26.3243	19.1745	27.6243	20.1495	17.2246	22.4244	12.0247	22.0994	22.4244	11.3747
1589	25.9994	19.8245	27.9493	20.1495	16.8996	22.7494	12.3497	21.7745	22.0994	11.3747
1590	26.6493	19.4995	27.9493	20.1495	16.8996	23.0744	12.6747	22.0994	22.0994	11.0497
1591	25.9994	19.1745	27.6243	20.1495	17.2246	22.7494	12.6747	22.0994	23.0744	11.3747
1592	25.9994	19.4995	28.2743	20.1495	16.5746	22.4244	12.3497	22.0994	21.7745	11.3747
1593	26.3243	18.5245	27.6243	20.1495	16.8996	22.7494	11.6997	22.0994	21.7745	11.3747
1594	26.3243	18.8495	27.2993	19.1745	17.2246	22.7494	12.0247	22.4244	23.0744	11.3747
1595	26.3243	19.1745	27.6243	19.8245	17.2246	22.7494	12.6747	21.7745	22.4244	10.7247
1596	26.6493	19.1745	27.6243	20.1495	16.8996	23.0744	12.6747	22.0994	23.0744	11.3747
1597	26.3243	18.5245	27.6243	19.1745	17.5496	22.7494	11.3747	22.4244	22.7494	11.3747
1598	25.9994	18.8495	27.6243	20.1495	17.2246	22.7494	12.6747	21.7745	23.0744	11.3747
1599	26.6493	18.8495	27.9493	20.1495	17.2246	23.0744	12.6747	22.0994	21.7745	11.0497
1600	26.6493	18.5245	27.9493	20.4745	17.2246	23.0744	12.6747	21.7745	21.4495	11.3747
1601	25.9994	19.1745	27.9493	19.8245	16.8996	23.0744	12.6747	21.7745	21.7745	11.0497
1602	25.9994	18.8495	27.6243	19.8245	17.2246	22.7494	12.6747	22.0994	23.0744	11.0497
1603	25.6744	19.1745	27.9493	19.8245	17.2246	22.7494	12.0247	22.0994	23.0744	11.0497
1604	26.3243	18.8495	27.9493	19.8245	16.8996	22.7494	12.3497	22.0994	22.0994	11.0497
1605	25.9994	18.8495	27.6243	19.4995	17.2246	22.7494	12.3497	22.0994	21.4495	11.0497
1606	26.3243	19.1745	27.6243	20.4745	17.5496	22.7494	12.6747	21.7745	23.0744	11.0497
1607	26.6493	18.8495	27.6243	19.8245	17.5496	22.7494	11.6997	21.7745	23.0744	11.3747
1608	25.9994	19.1745	27.6243	19.8245	16.8996	23.0744	12.3497	22.4244	22.0994	11.3747
1609	26.3243	19.1745	27.6243	19.8245	17.2246	23.0744	12.3497	22.0994	21.7745	11.3747
1610	25.9994	18.8495	28.2743	19.8245	17.2246	22.4244	12.3497	22.0994	23.0744	11.0497
1611	25.9994	18.8495	27.9493	20.1495	17.5496	22.7494	11.6997	22.0994	22.0994	11.0497
1612	26.3243	18.8495	27.6243	20.1495	17.2246	22.7494	12.0247	22.4244	22.4244	11.0497
1613	25.9994	18.8495	27.9493	19.8245	17.2246	22.4244	12.3497	22.0994	22.4244	11.0497
1614	26.3243	18.5245	27.9493	19.4995	17.2246	22.4244	12.0247	22.4244	22.7494	11.0497
1615	26.6493	18.8495	27.6243	19.8245	17.2246	22.4244	11.6997	21.7745	21.1245	11.3747
1616	26.3243	18.5245	28.2743	19.4995	17.8746	22.7494	12.6747	21.7745	22.4244	11.0497
1617	26.6493	18.8495	28.2743	19.4995	16.8996	23.0744	12.6747	22.0994	22.0994	11.3747
1618	25.9994	19.4995	28.2743	19.8245	17.5496	22.7494	12.9997	22.0994	22.7494	11.0497
1619	26.6493	19.1745	27.9493	19.1745	17.2246	22.7494	12.0247	22.0994	20.7995	10.7247
1620	26.6493	19.1745	27.9493	19.8245	17.2246	22.7494	12.6747	22.0994	22.7494	11.3747
1621	25.9994	18.5245	27.9493	19.8245	17.2246	22.7494	12.6747	22.4244	22.0994	11.0497
1622	26.3243	18.8495	27.9493	20.1495	17.2246	22.7494	12.3497	22.4244	23.0744	11.3747
1623	26.3243	18.8495	28.2743	20.1495	16.8996	22.4244	12.6747	22.0994	22.7494	11.0497
1624	26.3243	18.8495	27.6243	19.4995	16.8996	22.7494	12.3497	22.0994	22.7494	11.0497
1625	25.9994	18.8495	28.2743	20.1495	16.8996	22.4244	12.6747	22.0994	22.7494	11.6997
1626	26.6493	19.1745	28.2743	20.1495	16.5746	22.7494	12.3497	22.4244	22.7494	10.7247
1627	25.9994	18.8495	27.9493	20.1495	16.8996	22.7494	12.6747	22.4244	22.4244	11.3747
1628	26.3243	18.8495	27.9493	20.1495	16.8996	23.0744	12.3497	22.0994	22.0994	11.0497
1629	26.3243	19.1745	28.2743	19.8245	16.8996	23.0744	12.6747	22.4244	21.4495	11.0497
1630	26.6493	18.8495	27.9493	18.8495	17.2246	22.7494	12.6747	22.4244	21.7745	11.3747
1631	26.3243	18.5245	27.9493	19.8245	17.5496	22.4244	12.6747	22.4244	22.7494	11.3747
1632	25.9994	18.8495	27.9493	20.4745	17.2246	22.7494	12.6747	22.0994	23.0744	11.3747
1633	26.3243	18.5245	28.2743	19.8245	17.2246	22.0994	11.6997	22.0994	23.3994	11.0497
1634	26.3243	18.8495	27.9493	20.1495	16.8996	22.7494	11.6997	21.7745	23.0744	11.3747
1635	26.3243	18.8495	27.9493	19.8245	17.2246	22.7494	12.9997	22.0994	22.7494	11.0497
1636	25.9994	18.5245	27.6243	20.4745	16.8996	23.0744	12.3497	22.0994	21.7745	11.3747
1637	25.6744	19.1745	28.2743	20.4745	16.8996	22.0994	12.3497	22.4244	23.0744	11.3747
1638	25.9994	18.8495	27.9493	20.7995	17.2246	22.4244	12.9997	22.0994	22.7494	11.0497
1639	26.9743	18.8495	27.6243	20.4745	16.8996	23.0744	12.6747	22.0994	23.0744	11.6997
1640	25.9994	18.8495	27.9493	20.4745	16.5746	22.7494	12.6747	22.0994	23.0744	11.0497
1641	26.3243	19.1745	28.2743	19.8245	17.2246	22.7494	12.3497	22.0994	23.0744	11.0497
1642	25.6744	18.8495	28.2743	19.8245	17.2246	22.7494	12.3497	22.4244	22.4244	11.0497
1643	26.3243	18.5245	28.2743	20.1495	16.8996	22.7494	12.6747	21.7745	22.0994	11.0497
1644	25.9994	18.8495	27.9493	19.8245	16.5746	22.7494	13.6497	22.0994	22.7494	11.3747
1645	26.3243	18.8495	28.2743	20.7995	16.8996	22.4244	12.0247	22.0994	22.0994	11.3747
1646	26.3243	18.8495	27.9493	20.7995	17.2246	22.0994	12.6747	22.0994	21.7745	11.0497
1647	25.9994	18.5245	28.2743	19.8245	16.8996	22.4244	11.3747	22.0994	23.7244	11.6997
1648	25.9994	18.8495	27.9493	19.8245	16.8996	22.7494	12.9997	22.0994	22.0994	11.0497
1649	25.6744	18.5245	27.6243	19.8245	16.5746	23.0744	12.0247	22.4244	22.0994	11.0497
1650	26.3243	18.5245	27.9493	19.4995	17.8746	22.7494	12.6747	22.0994	22.0994	11.0497
1651	25.9994	19.1745	27.9493	19.8245	17.2246	22.7494	12.3497	22.0994	21.4495	11.3747
1652	26.3243	19.1745	27.9493	20.1495	16.8996	22.4244	12.6747	22.0994	22.0994	11.0497
1653	26.3243	19.1745	27.6243	19.8245	16.5746	22.4244	12.3497	22.4244	21.7745	11.0497
1654	25.9994	18.8495	27.6243	19.8245	16.5746	23.0744	12.6747	22.0994	22.4244	11.6997
1655	26.6493	18.8495	27.6243	19.8245	16.8996	22.7494	12.3497	22.0994	21.4495	11.3747
1656	25.3494	18.5245	27.6243	20.1495	17.2246	22.7494	12.6747	22.7494	21.1245	11.3747
1657	26.3243	19.1745	27.9493	20.4745	17.2246	22.7494	12.3497	22.7494	20.7995	11.0497
1658	26.3243	19.1745	27.9493	19.8245	16.8996	22.7494	12.9997	22.0994	22.0994	11.0497
1659	26.3243	18.8495	27.9493	20.1495	16.5746	22.7494	12.3497	21.7745	23.0744	11.3747
1660	26.6493	19.1745	28.2743	19.8245	16.8996	22.7494	12.6747	22.0994	22.4244	11.3747
1661	26.3243	18.8495	27.9493	19.4995	16.8996	22.7494	12.9997	21.7745	21.4495	11.3747
1662	25.6744	18.8495	27.9493	19.8245	16.8996	22.7494	12.6747	22.0994	22.7494	11.3747
1663	26.3243	18.5245	27.9493	19.8245	16.8996	22.7494	12.3497	22.0994	21.7745	11.0497
1664	26.3243	18.8495	27.6243	20.1495	16.8996	22.4244	12.0247	22.0994	22.0994	11.3747
1665	25.6744	18.8495	27.9493	19.8245	16.5746	22.0994	12.3497	22.0994	21.1245	11.3747
1666	26.3243	18.5245	27.9493	19.8245	17.2246	22.7494	12.3497	22.0994	21.7745	11.0497
1667	25.9994	18.8495	27.9493	20.1495	16.8996	22.7494	11.6997	22.0994	21.7745	11.0497
1668	26.3243	18.8495	28.2743	20.1495	16.8996	22.7494	11.6997	22.4244	21.4495	11.3747
1669	25.6744	19.1745	28.2743	20.1495	16.8996	23.0744	12.3497	21.7745	21.4495	11.0497
1670	25.9994	19.1745	27.6243	19.4995	16.8996	22.7494	12.9997	21.7745	21.7745	11.0497
1671	26.6493	18.8495	28.2743	19.8245	16.5746	23.0744	12.3497	22.0994	22.0994	11.3747
1672	26.6493	18.8495	27.6243	19.4995	16.5746	22.7494	11.6997	21.7745	21.4495	11.6997
1673	25.9994	18.5245	28.2743	19.8245	16.8996	23.0744	11.6997	22.4244	22.7494	11.3747
1674	25.9994	18.8495	28.2743	20.7995	16.8996	22.7494	12.3497	22.4244	21.7745	11.0497
1675	26.3243	18.8495	27.6243	20.4745	16.8996	22.4244	11.6997	22.0994	22.4244	11.0497
1676	25.9994	18.8495	27.9493	20.1495	16.5746	22.7494	11.6997	22.0994	21.7745	11.3747
1677	25.9994	19.1745	27.6243	20.4745	16.5746	22.7494	11.6997	22.0994	21.4495	11.3747
1678	25.3494	19.1745	27.9493	19.8245	16.8996	23.0744	11.6997	21.7745	21.1245	11.3747
1679	25.9994	18.8495	27.9493	19.8245	17.2246	22.4244	12.3497	22.4244	23.0744	11.0497
1680	25.9994	19.1745	28.2743	20.4745	16.8996	23.0744	12.0247	21.4495	21.1245	10.7247
1681	26.3243	18.8495	27.6243	20.1495	16.5746	23.0744	12.6747	22.0994	21.4495	11.3747
1682	26.3243	18.8495	27.9493	19.4995	16.8996	22.7494	12.9997	21.7745	21.7745	11.3747
1683	26.3243	19.1745	27.9493	20.1495	16.8996	23.0744	11.6997	21.7745	22.0994	11.6997
1684	26.3243	18.5245	27.9493	19.4995	17.2246	22.7494	11.6997	21.7745	22.0994	11.3747
1685	25.9994	18.8495	27.9493	20.1495	16.5746	22.7494	12.0247	22.0994	20.7995	11.3747
1686	25.9994	19.1745	27.9493	20.1495	16.8996	22.7494	12.3497	21.7745	21.7745	11.3747
1687	25.9994	18.8495	27.9493	19.8245	16.5746	22.7494	12.6747	22.0994	22.4244	11.3747
1688	26.6493	19.1745	27.9493	20.7995	17.2246	22.7494	12.6747	22.0994	21.4495	11.3747
1689	26.6493	18.8495	28.2743	20.4745	16.5746	22.4244	12.3497	22.0994	21.4495	11.3747
1690	25.6744	18.8495	27.9493	19.8245	16.8996	22.7494	12.0247	21.7745	21.1245	11.6997
1691	26.9743	18.5245	27.9493	19.8245	16.5746	22.7494	11.6997	22.0994	21.7745	11.3747
1692	25.9994	18.5245	27.9493	19.8245	17.2246	22.7494	12.6747	21.7745	21.1245	11.0497
1693	26.3243	18.8495	27.9493	20.1495	16.5746	22.7494	12.6747	21.7745	21.7745	11.3747
1694	26.3243	18.5245	28.2743	20.1495	16.5746	23.0744	12.3497	21.1245	20.7995	11.3747
1695	26.9743	18.8495	27.9493	20.4745	17.2246	22.7494	12.9997	22.4244	21.7745	11.3747
1696	26.9743	18.8495	27.9493	20.4745	16.5746	23.0744	12.3497	22.0994	21.4495	11.0497
1697	26.3243	18.8495	27.9493	19.8245	16.5746	22.7494	12.6747	21.7745	21.7745	11.0497
1698	26.3243	18.5245	27.6243	19.4995	16.8996	23.0744	12.3497	22.0994	23.0744	11.0497
1699	26.3243	18.5245	28.2743	20.1495	16.8996	23.0744	11.6997	21.7745	23.0744	11.3747
1700	26.3243	18.5245	27.6243	19.8245	16.5746	23.0744	12.6747	21.7745	21.4495	10.7247
1701	26.3243	18.8495	28.2743	20.7995	16.5746	22.7494	12.3497	21.4495	22.4244	11.3747
1702	26.3243	19.1745	27.9493	20.1495	16.5746	23.0744	12.0247	21.4495	21.7745	11.6997
1703	26.3243	19.1745	27.9493	20.4745	16.5746	23.0744	12.6747	21.7745	21.7745	11.0497
1704	25.9994	19.1745	27.9493	20.1495	16.5746	23.0744	13.3247	21.7745	21.7745	11.6997
1705	26.6493	19.1745	27.9493	20.1495	16.5746	23.0744	12.9997	21.7745	22.0994	11.6997
1706	26.6493	19.1745	27.9493	20.1495	16.8996	23.0744	12.6747	21.7745	21.7745	11.3747
1707	26.6493	19.1745	27.6243	19.8245	16.8996	23.0744	12.3497	22.0994	21.7745	11.3747
1708	26.6493	19.1745	27.6243	20.1495	16.8996	23.0744	12.0247	21.7745	22.7494	11.3747
1709	26.3243	19.1745	27.9493	20.4745	16.5746	22.4244	12.3497	21.7745	21.7745	11.0497
1710	26.9743	19.4995	27.9493	20.1495	15.9246	23.0744	12.3497	21.7745	21.1245	11.6997
1711	25.9994	19.1745	27.6243	20.7995	16.5746	23.3994	12.3497	21.4495	21.7745	11.3747
1712	26.6493	19.1745	27.9493	19.4995	16.5746	22.7494	12.3497	21.7745	21.7745	11.0497
1713	26.3243	18.5245	27.6243	19.8245	16.5746	22.7494	12.9997	22.0994	22.4244	11.3747
1714	26.6493	19.1745	27.9493	19.4995	16.5746	22.7494	11.6997	22.0994	21.7745	11.3747
1715	26.6493	19.1745	27.9493	19.4995	16.2496	22.7494	12.0247	21.7745	21.7745	11.3747
1716	26.6493	18.8495	27.6243	19.4995	16.5746	22.7494	12.3497	21.7745	21.1245	11.3747
1717	25.9994	19.1745	27.6243	19.8245	16.5746	23.0744	12.0247	21.4495	22.4244	11.6997
1718	26.6493	19.1745	27.9493	19.8245	16.2496	23.0744	12.6747	21.4495	21.4495	11.3747
1719	26.3243	19.1745	27.6243	19.8245	16.5746	23.0744	12.3497	21.4495	23.0744	11.0497
1720	26.6493	19.1745	27.9493	20.1495	16.2496	23.0744	12.3497	22.0994	21.4495	11.3747
1721	26.6493	19.1745	27.9493	20.1495	16.2496	23.0744	12.6747	22.0994	21.7745	11.0497
1722	26.9743	19.1745	28.2743	19.8245	16.5746	22.7494	12.0247	22.0994	21.4495	11.3747
1723	26.6493	18.8495	27.9493	20.1495	16.5746	23.0744	12.6747	22.0994	21.7745	12.0247
1724	26.6493	18.8495	27.9493	20.1495	16.5746	22.4244	12.3497	21.7745	21.7745	11.6997
1725	26.3243	18.8495	27.6243	20.1495	16.8996	22.4244	12.3497	22.0994	21.7745	11.0497
1726	25.9994	19.1745	27.6243	18.8495	16.2496	23.0744	11.3747	22.4244	21.4495	11.0497
1727	26.6493	18.8495	27.9493	19.4995	16.5746	23.0744	11.6997	22.0994	22.0994	11.0497
1728	26.6493	18.8495	27.9493	20.1495	16.2496	22.7494	12.6747	22.0994	22.0994	11.0497
1729	25.9994	18.8495	27.9493	19.4995	16.2496	22.7494	12.3497	22.0994	21.7745	11.0497
1730	26.6493	19.1745	27.9493	19.8245	16.5746	22.7494	12.6747	21.7745	21.7745	11.3747
1731	25.9994	19.1745	27.9493	19.1745	16.2496	23.0744	12.0247	22.0994	22.0994	11.0497
1732	26.3243	19.4995	27.9493	19.4995	16.5746	22.4244	12.6747	22.0994	22.0994	11.3747
1733	26.3243	18.8495	27.6243	20.4745	16.5746	23.0744	12.9997	21.7745	21.7745	11.3747
1734	26.3243	19.4995	27.6243	20.1495	16.5746	22.4244	12.6747	21.7745	21.4495	10.7247
1735	25.9994	18.1995	27.9493	20.1495	16.5746	22.7494	12.6747	22.0994	21.4495	11.6997
1736	25.6744	18.5245	27.6243	19.8245	16.5746	22.7494	12.3497	22.0994	22.0994	11.3747
1737	25.6744	18.8495	27.9493	20.1495	16.8996	22.4244	12.0247	22.0994	21.7745	11.6997
1738	25.6744	19.1745	27.9493	20.1495	16.5746	22.4244	12.0247	22.0994	21.1245	11.6997
1739	25.9994	18.5245	27.9493	20.1495	16.8996	23.0744	12.0247	22.0994	21.7745	11.6997
1740	25.6744	19.4995	27.9493	20.1495	16.5746	22.7494	12.3497	22.4244	20.4745	11.6997
1741	25.9994	18.5245	27.9493	20.4745	16.2496	22.4244	12.3497	22.0994	21.7745	11.6997
1742	25.6744	19.4995	27.6243	20.1495	16.5746	22.7494	13.3247	22.4244	21.4495	11.6997
1743	25.6744	19.1745	27.6243	20.1495	16.5746	23.0744	12.6747	22.4244	21.7745	11.3747
1744	26.3243	19.1745	27.6243	19.4995	16.8996	22.7494	12.6747	22.4244	21.7745	11.3747
1745	26.3243	19.4995	27.9493	19.4995	16.5746	23.0744	11.6997	22.4244	21.7745	11.3747
1746	25.9994	19.4995	27.9493	19.8245	16.5746	22.4244	12.6747	22.0994	21.7745	11.6997
1747	25.6744	19.4995	27.9493	19.8245	16.2496	23.0744	12.3497	22.4244	21.4495	11.3747
1748	25.9994	19.4995	27.9493	19.4995	16.5746	22.4244	12.0247	22.7494	21.4495	11.6997
1749	25.6744	18.8495	27.6243	19.8245	16.8996	23.0744	12.3497	22.4244	21.7745	11.3747
1750	25.6744	19.4995	27.9493	20.4745	16.2496	22.7494	12.6747	22.4244	22.4244	11.6997
1751	25.9994	19.1745	27.9493	19.8245	16.5746	23.0744	12.3497	22.7494	20.4745	11.3747
1752	25.9994	19.1745	27.6243	19.8245	16.5746	22.7494	11.6997	22.0994	22.4244	11.6997
1753	25.9994	19.4995	27.9493	19.8245	17.2246	22.4244	12.3497	22.0994	21.1245	11.3747
1754	25.3494	19.4995	27.9493	20.1495	16.2496	22.4244	12.3497	22.0994	21.7745	12.0247
1755	25.9994	19.8245	27.9493	20.4745	16.2496	22.7494	12.6747	22.4244	21.1245	11.3747
1756	25.9994	19.8245	27.9493	19.8245	16.2496	22.7494	12.0247	22.0994	21.7745	12.0247
1757	25.9994	19.4995	27.9493	19.4995	16.5746	22.4244	12.3497	22.4244	21.7745	11.6997
1758	25.9994	19.8245	27.9493	18.8495	16.5746	23.0744	12.3497	22.0994	21.4495	11.3747
1759	25.0244	19.4995	27.6243	19.8245	16.5746	23.0744	12.0247	22.0994	21.7745	11.0497
1760	25.9994	19.8245	27.9493	20.1495	16.8996	23.0744	12.0247	22.4244	21.7745	11.6997
1761	26.3243	19.1745	27.9493	19.4995	16.5746	22.4244	12.3497	22.4244	21.7745	11.3747
1762	25.9994	19.1745	27.9493	20.4745	16.2496	23.0744	12.0247	22.4244	21.7745	11.3747
1763	25.6744	19.4995	27.9493	20.1495	16.5746	22.7494	12.6747	22.4244	22.0994	11.6997
1764	25.3494	19.8245	27.6243	19.8245	16.2496	23.0744	12.6747	21.7745	21.4495	11.6997
1765	25.6744	19.1745	27.9493	19.8245	16.5746	22.4244	12.3497	22.4244	20.7995	11.3747
1766	25.6744	19.4995	27.9493	19.4995	16.5746	22.4244	11.6997	22.0994	21.7745	11.3747
1767	25.9994	19.8245	27.9493	20.7995	16.2496	22.0994	12.3497	21.7745	21.7745	11.6997
1768	25.6744	18.8495	27.6243	19.8245	16.2496	22.7494	12.9997	22.4244	22.0994	11.3747
1769	25.9994	18.8495	27.9493	19.4995	16.2496	22.4244	12.0247	22.0994	22.0994	11.0497
1770	25.9994	19.1745	27.9493	20.4745	16.2496	22.4244	12.0247	22.0994	20.4745	11.0497
1771	26.3243	18.5245	27.9493	20.1495	15.9246	23.0744	12.6747	22.0994	21.7745	11.0497
1772	26.3243	18.8495	27.2993	19.8245	16.5746	22.4244	12.3497	21.7745	21.4495	11.3747
1773	26.3243	19.1745	27.6243	19.8245	16.5746	23.0744	12.0247	21.7745	21.7745	11.3747
1774	25.3494	19.1745	27.6243	20.4745	16.2496	23.0744	12.6747	21.7745	21.4495	11.3747
1775	25.6744	19.1745	27.6243	19.4995	16.2496	23.0744	11.6997	22.0994	21.4495	11.6997
1776	26.3243	19.1745	27.9493	20.1495	15.9246	22.4244	11.6997	22.4244	21.7745	11.3747
1777	25.3494	19.1745	27.6243	20.1495	16.5746	22.7494	12.3497	22.4244	21.7745	11.6997
1778	25.9994	18.8495	27.6243	19.8245	16.2496	22.7494	12.6747	21.7745	21.4495	11.3747
1779	25.6744	19.4995	27.9493	19.8245	15.9246	22.4244	12.3497	22.0994	21.1245	11.3747
1780	26.3243	19.1745	27.6243	20.7995	16.2496	22.7494	12.3497	22.4244	21.4495	11.3747
[truncated: 51 more rows]
