# Supplementary material for: Elevated pyramidal cell firing orchestrates arteriolar vasoconstriction through COX-2-derived prostaglandin E2 signaling
Source: eLife. 2025 Apr 23;13:RP102424. doi: 10.7554/eLife.102424 (PMC12017770; doi:10.7554/eLife.102424)
Supplement: Figure 5—figure supplement 1—source data 1. [file elife-102424-fig5-figsupp1-data1.xls]

## Sheet: Indomethacine
Stimulation
Time	BGBV-278_0000	BGBV-279_0000	BGBV-281_0000	BGBV-282_0000	BGBV-284_0000	BGBV-415_0000	BGBV-416_0000	BGBV-418_0000
0	10.7247	11.3747	16.5746	10.3997	19.4995	21.1245	25.6744	24.0494
10	11.0497	11.3747	16.5746	10.3997	19.1745	21.1245	25.6744	24.0494
20	10.7247	11.3747	16.5746	10.3997	18.5245	21.1245	25.0244	23.7244
30	10.7247	11.6997	16.5746	10.3997	19.1745	21.1245	25.3494	23.7244
40	10.7247	11.6997	16.5746	10.3997	19.1745	20.7995	24.6994	23.7244
50	10.7247	11.6997	16.8996	10.7247	19.1745	21.1245	25.3494	24.0494
60	10.7247	12.0247	16.5746	10.7247	19.1745	21.1245	25.3494	24.6994
70	10.7247	11.3747	16.5746	10.7247	18.8495	21.1245	25.0244	24.3744
80	10.7247	11.3747	16.5746	10.3997	19.1745	21.1245	25.0244	24.6994
90	10.7247	11.6997	16.8996	10.3997	19.1745	21.1245	25.0244	24.3744
100	10.3997	11.6997	16.5746	10.3997	18.8495	21.1245	25.0244	24.0494
110	10.3997	12.0247	16.8996	10.7247	19.1745	21.1245	25.0244	23.7244
120	10.3997	11.6997	16.5746	10.7247	18.8495	21.1245	25.0244	24.0494
130	10.7247	11.3747	16.5746	10.3997	18.8495	21.1245	25.0244	24.0494
140	10.3997	11.3747	16.5746	10.7247	19.1745	21.1245	25.0244	24.0494
150	10.7247	11.0497	16.8996	10.3997	19.1745	20.7995	24.6994	24.3744
160	10.7247	10.7247	16.8996	10.7247	19.1745	21.1245	25.0244	23.7244
170	10.7247	10.7247	16.8996	10.3997	19.1745	21.1245	24.6994	24.0494
180	10.7247	11.0497	16.5746	10.7247	18.8495	20.7995	24.6994	24.0494
190	10.7247	11.0497	16.5746	10.7247	19.1745	21.1245	24.6994	24.3744
200	10.7247	11.0497	16.5746	10.7247	19.1745	21.1245	25.3494	24.3744
210	11.0497	11.0497	16.5746	10.7247	18.8495	20.7995	25.0244	23.7244
220	10.7247	11.3747	16.5746	10.7247	18.5245	21.1245	24.6994	24.0494
230	11.0497	10.7247	16.5746	10.7247	18.5245	20.7995	25.0244	24.0494
240	10.7247	11.3747	16.5746	10.7247	19.4995	20.7995	24.6994	24.0494
250	11.0497	11.0497	16.8996	10.3997	18.8495	20.7995	25.0244	24.0494
260	11.0497	10.7247	16.8996	10.3997	19.1745	21.1245	25.0244	24.0494
270	11.0497	11.0497	16.8996	10.3997	18.5245	20.7995	25.3494	24.0494
280	11.0497	10.7247	16.5746	10.7247	19.1745	20.7995	25.6744	23.7244
290	11.0497	11.3747	16.5746	10.3997	19.4995	20.7995	25.6744	24.0494
300	11.0497	11.3747	16.5746	10.3997	19.8245	20.7995	24.6994	23.7244
310	11.0497	11.3747	16.8996	10.3997	19.8245	20.7995	25.0244	24.0494
320	11.0497	11.3747	16.8996	10.7247	19.4995	20.7995	25.0244	24.3744
330	11.0497	11.3747	16.5746	10.3997	19.4995	20.7995	24.6994	24.6994
340	11.0497	11.6997	16.2496	10.3997	19.8245	20.7995	25.3494	24.0494
350	11.0497	11.3747	15.5996	10.3997	19.4995	20.7995	25.0244	23.7244
360	10.7247	12.0247	15.9246	10.3997	19.8245	20.7995	25.0244	23.7244
370	11.0497	11.6997	15.9246	10.3997	20.1495	21.1245	25.0244	24.3744
380	10.7247	11.3747	15.9246	10.3997	20.4745	21.1245	25.0244	24.0494
390	10.7247	11.0497	15.5996	10.3997	20.1495	21.1245	24.6994	24.0494
400	10.7247	11.6997	15.9246	10.3997	19.8245	20.7995	25.3494	24.6994
410	10.7247	11.6997	15.9246	10.7247	20.1495	21.1245	25.3494	23.7244
420	10.7247	11.3747	15.9246	10.7247	20.1495	21.1245	25.0244	24.0494
430	10.7247	11.3747	15.9246	10.7247	19.8245	20.7995	25.0244	23.7244
440	10.7247	11.3747	15.9246	10.3997	19.8245	21.1245	25.3494	23.7244
450	10.7247	11.3747	15.5996	10.0747	20.1495	21.1245	25.0244	24.0494
460	10.7247	11.6997	15.5996	10.3997	19.8245	21.1245	25.0244	24.3744
470	10.7247	11.3747	15.9246	10.7247	19.8245	21.1245	25.0244	23.7244
480	10.3997	11.0497	15.9246	10.3997	19.4995	21.1245	25.6744	24.0494
490	10.3997	11.0497	15.5996	11.0497	19.4995	21.1245	25.3494	23.7244
500	10.7247	11.3747	15.5996	10.3997	19.4995	21.1245	25.3494	24.3744
510	10.0747	12.0247	15.5996	10.3997	19.4995	21.1245	25.3494	23.7244
520	10.3997	11.6997	15.5996	10.0747	19.4995	20.7995	25.3494	23.7244
530	10.3997	11.3747	15.5996	11.0497	19.4995	21.1245	25.6744	23.7244
540	10.7247	11.3747	15.5996	10.3997	18.8495	20.7995	25.6744	23.7244
550	10.7247	10.7247	15.2746	10.3997	19.8245	20.7995	25.3494	24.3744
560	10.7247	11.0497	14.9496	10.3997	20.1495	21.1245	25.3494	24.3744
570	10.7247	11.3747	15.2746	10.3997	19.8245	21.1245	25.6744	23.3994
580	10.7247	11.3747	15.5996	10.3997	19.8245	21.1245	25.0244	24.0494
590	10.7247	12.0247	15.2746	10.3997	19.8245	21.1245	25.3494	24.0494
600	10.7247	11.3747	15.2746	10.3997	19.8245	20.4745	25.0244	24.0494
610	10.7247	11.3747	15.2746	10.3997	19.8245	20.7995	24.6994	24.0494
620	10.7247	11.3747	15.5996	10.3997	19.8245	21.1245	25.3494	24.3744
630	11.0497	11.3747	16.5746	10.3997	20.1495	20.7995	25.0244	24.0494
640	10.7247	11.3747	16.5746	10.3997	19.8245	21.1245	25.0244	23.7244
650	10.7247	11.6997	16.5746	10.3997	19.4995	21.1245	25.3494	24.6994
660	10.7247	11.0497	16.5746	10.3997	19.4995	21.1245	24.6994	24.0494
670	10.7247	11.3747	16.5746	10.3997	20.4745	21.1245	25.0244	24.0494
680	10.7247	11.6997	16.2496	10.3997	20.1495	21.1245	25.0244	23.7244
690	10.7247	11.6997	16.5746	10.3997	20.7995	21.1245	25.0244	23.7244
700	10.7247	11.0497	16.5746	10.0747	20.4745	21.1245	25.0244	23.3994
710	10.7247	11.3747	16.5746	10.7247	20.7995	21.1245	24.6994	24.0494
720	10.7247	11.3747	16.5746	10.3997	20.4745	21.1245	25.0244	24.6994
730	10.7247	10.7247	16.8996	10.0747	20.1495	21.1245	25.0244	23.7244
740	10.7247	11.0497	16.2496	10.3997	20.1495	21.1245	24.6994	24.0494
750	10.7247	10.3997	16.2496	10.0747	19.1745	21.1245	24.6994	23.7244
760	10.7247	11.3747	16.5746	10.3997	20.1495	21.4495	25.3494	24.3744
770	11.3747	10.0747	16.5746	10.0747	20.1495	21.1245	25.3494	23.3994
780	11.3747	10.3997	16.5746	10.3997	19.8245	21.1245	24.6994	24.6994
790	11.0497	10.0747	16.5746	10.0747	19.8245	21.4495	24.6994	24.3744
800	11.0497	10.3997	16.5746	10.3997	19.4995	21.1245	24.3744	24.3744
810	11.0497	10.3997	16.5746	10.7247	19.4995	21.1245	24.6994	24.0494
820	11.0497	11.0497	16.5746	10.3997	19.8245	21.1245	25.0244	23.7244
830	11.3747	11.6997	16.5746	10.7247	19.4995	20.7995	24.3744	23.7244
840	11.3747	11.0497	16.2496	10.3997	19.8245	21.1245	24.6994	23.3994
850	11.0497	10.7247	16.5746	10.3997	19.4995	20.7995	24.6994	23.0744
860	10.7247	10.3997	16.2496	10.3997	19.1745	21.1245	25.0244	24.0494
870	10.7247	10.7247	16.5746	10.0747	19.1745	21.4495	24.6994	23.7244
880	10.7247	10.7247	16.2496	10.7247	19.8245	21.1245	24.0494	23.7244
890	10.7247	10.3997	16.5746	10.3997	19.1745	21.1245	25.3494	23.7244
900	11.0497	10.7247	16.2496	10.0747	19.1745	21.1245	25.0244	23.7244
910	10.7247	11.3747	16.5746	10.3997	19.1745	21.4495	25.0244	23.3994
920	10.7247	11.0497	16.2496	10.3997	18.8495	21.1245	25.0244	24.3744
930	10.7247	11.0497	16.5746	10.3997	19.8245	21.1245	24.6994	23.0744
940	10.7247	11.6997	16.2496	10.3997	19.4995	21.1245	25.6744	24.0494
950	11.0497	11.6997	16.5746	10.3997	19.4995	21.1245	25.3494	23.3994
960	11.0497	11.3747	16.5746	10.3997	19.1745	21.1245	25.3494	23.0744
970	11.0497	11.6997	16.5746	10.3997	19.1745	21.1245	24.6994	23.0744
980	11.0497	10.0747	16.5746	10.7247	19.4995	21.1245	25.0244	23.7244
990	11.0497	10.3997	16.2496	10.3997	19.1745	21.1245	25.0244	24.0494
1000	11.3747	11.0497	16.2496	10.0747	19.1745	21.1245	25.6744	23.3994
1010	11.3747	10.7247	16.2496	10.3997	18.8495	21.1245	25.3494	23.7244
1020	11.3747	10.7247	16.2496	10.3997	19.1745	21.1245	25.0244	23.7244
1030	11.0497	11.3747	16.2496	10.7247	18.8495	21.1245	25.3494	23.7244
1040	11.3747	11.3747	16.5746	10.0747	19.1745	21.1245	25.0244	23.3994
1050	11.0497	11.3747	16.5746	10.3997	19.4995	21.1245	25.3494	24.0494
1060	11.0497	11.0497	16.5746	10.3997	19.4995	21.1245	25.0244	24.0494
1070	11.0497	11.0497	16.2496	10.0747	19.1745	21.1245	25.3494	23.7244
1080	11.0497	11.0497	16.5746	10.0747	19.4995	21.1245	25.0244	23.3994
1090	11.0497	11.0497	16.2496	10.0747	19.8245	21.1245	25.3494	23.3994
1100	11.0497	11.0497	16.5746	10.7247	18.8495	21.1245	25.3494	23.7244
1110	11.0497	11.0497	16.5746	10.0747	19.1745	21.1245	25.3494	23.7244
1120	10.7247	11.0497	16.5746	10.3997	19.1745	21.1245	25.0244	23.3994
1130	11.0497	11.0497	16.5746	10.3997	19.1745	21.1245	25.3494	23.3994
1140	10.7247	10.7247	16.2496	10.3997	19.1745	21.1245	25.0244	23.7244
1150	11.0497	11.6997	16.5746	10.3997	18.8495	21.1245	24.6994	23.3994
1160	11.0497	11.3747	16.2496	10.3997	18.5245	21.1245	25.6744	24.0494
1170	10.7247	11.0497	15.5996	10.3997	18.8495	21.1245	25.3494	23.7244
1180	11.0497	10.7247	16.5746	10.3997	18.8495	20.7995	25.6744	24.3744
1190	11.0497	11.3747	15.9246	10.3997	18.5245	21.1245	25.6744	24.0494
1200	10.7247	11.3747	16.2496	10.3997	18.1995	21.1245	24.6994	24.3744
1210	11.0497	11.3747	15.9246	10.3997	18.1995	21.1245	25.3494	24.3744
1220	11.0497	11.3747	15.9246	10.3997	18.5245	21.1245	24.6994	24.0494
1230	10.7247	11.3747	15.9246	10.3997	18.5245	21.1245	25.6744	24.0494
1240	10.3997	11.3747	15.9246	10.3997	18.5245	21.1245	24.3744	24.0494
1250	10.7247	11.0497	16.2496	10.3997	18.8495	20.7995	25.0244	24.0494
1260	10.3997	11.3747	15.9246	10.3997	19.1745	21.1245	25.0244	24.0494
1270	10.7247	11.3747	15.9246	10.3997	18.8495	21.1245	25.0244	24.0494
1280	10.3997	11.0497	15.9246	10.3997	18.8495	21.1245	24.6994	23.7244
1290	10.3997	11.0497	16.2496	10.3997	19.1745	20.4745	25.0244	24.3744
1300	10.7247	11.0497	16.2496	10.3997	19.8245	21.1245	25.9994	24.0494
1310	11.0497	11.0497	16.2496	10.0747	19.1745	21.1245	25.6744	24.0494
1320	11.0497	9.74976	15.9246	10.0747	18.8495	20.7995	25.3494	24.0494
1330	11.0497	10.3997	15.5996	10.3997	19.1745	20.7995	25.0244	24.3744
1340	10.7247	10.3997	15.5996	10.0747	19.8245	20.7995	24.6994	24.3744
1350	11.0497	10.7247	15.9246	10.3997	19.4995	21.1245	25.0244	24.0494
1360	11.0497	11.0497	15.5996	10.3997	19.1745	20.7995	25.3494	24.6994
1370	10.7247	10.3997	15.5996	10.3997	19.4995	20.7995	25.6744	23.3994
1380	10.7247	10.3997	15.9246	10.0747	19.4995	21.1245	25.3494	23.7244
1390	10.7247	11.0497	15.9246	10.3997	19.8245	21.1245	25.0244	23.7244
1400	10.7247	11.0497	16.2496	10.0747	20.1495	21.1245	25.0244	24.3744
1410	10.7247	10.7247	15.9246	10.3997	19.4995	20.7995	25.0244	24.0494
1420	10.7247	10.0747	16.2496	10.0747	19.1745	21.1245	24.3744	23.7244
1430	10.7247	11.0497	15.5996	10.0747	19.4995	21.1245	25.0244	23.7244
1440	10.7247	11.3747	15.9246	10.3997	19.8245	20.7995	24.3744	24.0494
1450	11.0497	11.0497	15.9246	10.0747	19.1745	20.7995	24.6994	23.7244
1460	11.0497	10.3997	15.9246	10.3997	19.1745	20.7995	24.6994	24.6994
1470	10.7247	11.3747	15.2746	10.0747	19.4995	21.1245	25.0244	23.7244
1480	10.7247	10.7247	15.2746	10.7247	19.4995	20.7995	24.6994	24.3744
1490	10.7247	10.7247	15.5996	10.3997	19.1745	20.7995	25.3494	24.6994
1500	10.7247	11.0497	15.9246	10.3997	19.4995	20.7995	25.0244	23.7244
1510	10.7247	10.7247	15.5996	10.0747	18.8495	20.7995	25.0244	24.0494
1520	10.7247	11.0497	15.5996	10.3997	19.1745	20.7995	25.0244	23.7244
1530	10.7247	11.3747	15.2746	10.3997	19.1745	20.4745	24.3744	25.0244
1540	11.0497	11.3747	15.2746	10.7247	19.4995	20.7995	25.3494	24.3744
1550	11.0497	11.0497	15.9246	10.3997	19.4995	20.7995	24.6994	23.7244
1560	11.0497	11.3747	15.2746	10.3997	19.4995	20.7995	24.6994	24.0494
1570	11.0497	11.3747	15.5996	10.3997	19.4995	20.7995	24.6994	23.7244
1580	11.0497	11.3747	15.5996	10.3997	19.1745	20.7995	25.0244	24.3744
1590	11.0497	10.7247	15.5996	10.3997	19.1745	20.7995	24.6994	24.0494
1600	10.7247	10.3997	15.2746	10.7247	19.1745	20.7995	25.6744	24.6994
1610	11.0497	10.7247	15.5996	10.7247	19.1745	21.1245	24.6994	24.3744
1620	11.0497	11.0497	15.5996	10.7247	19.1745	20.7995	25.6744	24.0494
1630	11.0497	10.7247	15.5996	10.7247	18.8495	20.7995	24.6994	24.3744
1640	10.7247	11.3747	15.5996	10.7247	18.8495	20.4745	25.0244	24.0494
1650	10.7247	11.0497	15.2746	10.7247	18.8495	20.7995	25.0244	24.6994
1660	11.0497	11.3747	15.5996	10.3997	18.1995	20.7995	25.3494	24.0494
1670	11.0497	11.3747	15.5996	10.3997	18.8495	20.7995	24.6994	24.0494
1680	11.0497	10.7247	15.2746	10.3997	18.8495	20.7995	24.6994	24.0494
1690	11.0497	11.0497	15.5996	10.7247	18.8495	20.7995	25.6744	24.0494
1700	10.7247	10.7247	15.5996	10.3997	19.4995	20.4745	24.0494	24.3744
1710	10.3997	11.6997	15.2746	10.3997	19.1745	20.7995	24.6994	24.0494
1720	10.7247	11.3747	15.2746	10.3997	19.1745	20.7995	24.3744	24.3744
1730	10.7247	11.3747	15.2746	10.3997	19.8245	20.4745	24.6994	24.3744
1740	10.7247	11.3747	15.2746	10.3997	19.8245	20.4745	24.6994	24.0494
1750	10.7247	11.6997	15.2746	10.7247	19.8245	20.4745	24.6994	24.6994
1760	10.7247	11.3747	15.2746	10.3997	19.8245	20.7995	24.6994	24.0494
1770	11.0497	11.6997	15.5996	10.7247	19.8245	20.7995	24.6994	24.0494
1780	10.7247	11.0497	15.2746	10.3997	19.4995	20.7995	24.6994	24.0494
1790	10.7247	11.3747	15.5996	10.7247	19.4995	20.7995	24.6994	24.3744
1800	11.0497	11.6997	15.5996	10.0747	19.1745	20.4745	24.6994	24.0494
1810	10.7247	12.0247	15.5996	10.7247	19.1745	20.7995	24.3744	24.0494
1820	11.0497	10.3997	15.5996	10.3997	19.4995	20.7995	24.3744	24.0494
1830	11.0497	10.3997	15.2746	10.7247	19.4995	20.4745	24.3744	24.3744
1840	11.0497	11.0497	15.2746	10.3997	19.4995	20.7995	24.3744	24.3744
1850	10.7247	11.3747	15.5996	10.3997	19.8245	20.4745	24.3744	23.7244
1860	11.0497	11.3747	15.5996	10.3997	19.8245	20.7995	24.6994	24.3744
1870	11.0497	11.3747	15.2746	10.3997	19.4995	20.4745	24.6994	23.7244
1880	10.7247	11.3747	15.2746	10.3997	19.4995	20.7995	25.0244	24.0494
1890	10.7247	12.0247	15.5996	10.3997	19.8245	20.7995	24.6994	24.0494
1900	10.7247	11.3747	15.5996	10.3997	19.8245	20.7995	24.6994	24.0494
1910	10.7247	11.3747	14.9496	10.3997	19.8245	20.7995	24.6994	23.7244
1920	10.7247	11.3747	15.5996	10.3997	19.8245	20.7995	24.3744	24.0494
1930	10.7247	11.6997	15.5996	10.3997	19.4995	20.4745	24.3744	23.7244
1940	10.7247	11.6997	15.9246	10.3997	19.4995	20.7995	24.6994	24.0494
1950	10.7247	12.0247	15.5996	10.3997	19.1745	20.7995	25.0244	24.3744
1960	10.7247	11.6997	15.5996	10.3997	19.4995	20.4745	25.0244	24.3744
1970	10.7247	11.6997	15.5996	10.3997	19.4995	20.4745	24.6994	24.0494
1980	10.7247	12.0247	15.5996	10.3997	19.1745	20.4745	24.6994	24.0494
1990	10.7247	12.6747	15.5996	10.3997	19.1745	20.7995	25.0244	24.0494
2000	10.7247	11.6997	15.5996	10.3997	19.1745	20.7995	25.0244	24.3744
2010	10.7247	12.3497	15.5996	10.3997	19.4995	20.4745	25.0244	24.0494
2020	10.7247	11.3747	15.5996	10.3997	19.8245	20.7995	24.3744	24.3744
2030	10.7247	11.6997	15.2746	10.3997	19.8245	20.7995	24.0494	24.3744
2040	10.3997	11.0497	15.5996	10.3997	19.1745	20.4745	24.6994	24.6994
2050	10.7247	11.3747	15.5996	10.3997	19.4995	21.1245	25.0244	24.6994
2060	10.7247	11.0497	15.2746	10.3997	19.8245	20.4745	24.6994	24.0494
2070	10.3997	11.0497	14.9496	10.3997	19.8245	20.7995	24.0494	23.7244
2080	11.0497	11.3747	15.2746	10.3997	19.4995	20.7995	25.0244	24.6994
2090	10.3997	11.0497	15.5996	10.3997	19.8245	20.7995	24.6994	24.0494

## Sheet: SC-560
Stimulation
Time	BGBV-356_0000	BGBV-366_0000	BGBV-367_0000	BGBV-368_0000	BGBV-370_0000	BGBV-371_0000	BGBV-372_0000	BGBV-431_0000	BGBV-432_0000	BGBV-433_0000
0	17.2246	15.9246	28.5993	16.8996	35.0991	16.2496	28.2743	12.0247	14.2996	17.2246
10	17.2246	15.5996	28.5993	16.5746	35.4241	16.5746	27.2993	12.0247	14.6246	17.8746
20	17.2246	15.5996	28.2743	16.5746	35.4241	16.2496	27.6243	12.0247	14.2996	17.5496
30	17.5496	15.5996	28.2743	16.8996	35.4241	16.2496	26.9743	12.3497	14.6246	17.5496
40	16.8996	15.2746	28.2743	16.8996	35.4241	16.2496	27.2993	12.0247	15.2746	17.5496
50	17.2246	15.2746	28.2743	16.8996	35.0991	15.9246	27.6243	12.0247	14.9496	17.5496
60	17.2246	15.5996	28.2743	16.5746	35.4241	15.9246	26.9743	12.0247	14.6246	17.5496
70	17.5496	15.9246	28.2743	16.8996	35.4241	16.2496	26.9743	12.3497	14.6246	17.5496
80	16.8996	15.9246	28.2743	16.8996	35.4241	15.9246	27.6243	12.0247	14.9496	17.5496
90	17.2246	15.9246	28.2743	17.2246	35.4241	15.9246	26.9743	12.0247	15.2746	16.8996
100	17.2246	15.9246	28.2743	16.8996	35.4241	16.5746	26.6493	12.0247	14.6246	17.5496
110	17.2246	15.5996	28.5993	17.2246	35.4241	15.9246	26.3243	12.0247	14.6246	17.2246
120	17.5496	15.5996	27.9493	16.8996	35.7491	16.2496	26.6493	12.0247	14.6246	17.2246
130	17.2246	15.9246	28.2743	16.8996	35.4241	15.9246	25.9994	12.3497	13.9747	17.2246
140	17.2246	15.5996	28.2743	16.5746	35.4241	15.9246	25.9994	11.6997	13.9747	17.2246
150	16.8996	15.5996	28.2743	16.8996	35.0991	16.2496	25.6744	12.0247	13.9747	17.2246
160	17.5496	15.5996	28.2743	16.5746	35.4241	15.9246	26.9743	12.3497	14.6246	17.5496
170	17.2246	15.5996	28.5993	16.5746	35.0991	16.2496	26.3243	12.6747	13.9747	17.2246
180	17.2246	15.5996	28.2743	16.5746	35.4241	16.5746	26.3243	12.3497	14.2996	17.2246
190	17.2246	15.5996	28.5993	16.5746	35.4241	16.5746	26.6493	12.0247	13.6497	17.5496
200	17.2246	15.5996	29.2493	16.5746	35.4241	15.9246	26.3243	12.6747	13.9747	17.5496
210	17.2246	15.5996	28.9243	16.5746	35.4241	15.9246	25.9994	12.6747	13.6497	17.5496
220	17.5496	15.9246	28.5993	16.5746	35.4241	15.9246	26.3243	12.6747	13.6497	17.5496
230	17.2246	15.5996	28.2743	16.5746	35.4241	15.9246	26.3243	12.6747	14.2996	17.2246
240	17.2246	15.9246	28.9243	16.8996	35.4241	15.9246	25.9994	12.9997	13.9747	16.8996
250	17.2246	15.9246	28.5993	16.8996	35.4241	16.2496	25.9994	12.3497	13.9747	17.5496
260	17.2246	15.5996	28.9243	16.8996	35.4241	15.5996	26.3243	12.3497	14.9496	17.2246
270	17.2246	15.5996	28.5993	16.8996	35.4241	15.9246	26.3243	12.3497	13.9747	17.2246
280	17.2246	15.9246	28.2743	17.2246	35.4241	15.9246	25.9994	12.0247	13.9747	17.2246
290	17.2246	15.5996	28.5993	16.8996	35.4241	15.9246	25.9994	12.3497	14.2996	17.5496
300	16.8996	15.9246	28.5993	17.2246	35.4241	15.9246	26.9743	12.3497	14.2996	17.2246
310	17.2246	15.5996	28.5993	16.8996	35.4241	16.2496	27.2993	12.3497	13.9747	17.5496
320	17.5496	15.9246	28.5993	16.8996	35.4241	15.9246	26.9743	13.3247	13.9747	17.2246
330	17.2246	15.5996	28.5993	17.2246	35.7491	16.2496	27.2993	12.3497	14.9496	17.2246
340	17.5496	15.5996	28.5993	17.2246	35.4241	16.2496	26.6493	13.3247	14.2996	17.2246
350	17.2246	15.9246	28.5993	16.8996	35.4241	15.9246	26.9743	12.6747	14.6246	17.5496
360	17.5496	15.9246	28.5993	16.8996	35.4241	15.5996	26.9743	13.6497	14.6246	17.2246
370	17.2246	15.9246	28.5993	16.8996	35.4241	15.9246	27.2993	13.3247	14.6246	17.2246
380	17.2246	16.2496	28.5993	16.8996	35.4241	15.9246	26.9743	13.3247	14.6246	17.5496
390	16.8996	15.9246	28.5993	16.8996	35.4241	15.9246	26.9743	13.3247	14.9496	17.2246
400	16.8996	15.9246	28.9243	16.8996	35.0991	15.5996	27.2993	12.6747	14.2996	17.2246
410	17.5496	15.9246	28.9243	16.5746	34.7741	15.9246	26.9743	12.9997	14.2996	17.5496
420	17.2246	15.9246	28.9243	16.8996	35.0991	15.9246	26.6493	12.6747	14.6246	17.5496
430	17.5496	15.5996	28.9243	16.5746	35.0991	15.5996	26.9743	12.0247	14.6246	17.5496
440	17.2246	15.5996	28.5993	16.5746	35.0991	15.9246	27.2993	11.6997	14.2996	17.2246
450	16.8996	15.9246	28.9243	16.5746	34.7741	15.5996	26.6493	11.6997	14.2996	17.5496
460	17.5496	15.9246	28.9243	16.5746	35.0991	15.5996	26.9743	12.0247	14.2996	17.5496
470	17.5496	15.9246	28.5993	16.5746	34.7741	16.2496	26.9743	12.3497	14.2996	17.5496
480	17.2246	15.9246	28.9243	16.5746	34.7741	15.9246	26.9743	12.3497	13.9747	17.5496
490	17.5496	15.9246	28.9243	16.5746	35.0991	15.9246	26.9743	12.9997	14.2996	17.5496
500	17.2246	15.5996	28.5993	16.5746	35.0991	15.5996	26.9743	13.3247	14.2996	17.5496
510	17.2246	15.9246	28.5993	16.5746	34.7741	15.9246	26.9743	12.6747	14.9496	17.5496
520	17.2246	15.9246	28.9243	16.5746	35.0991	15.9246	26.9743	12.0247	14.9496	17.2246
530	16.8996	15.9246	29.2493	16.5746	35.0991	15.9246	26.6493	12.9997	14.6246	17.2246
540	16.8996	15.9246	29.2493	16.5746	35.0991	15.9246	26.3243	12.6747	14.2996	17.5496
550	17.2246	15.9246	29.2493	16.5746	35.0991	15.9246	25.9994	12.3497	14.6246	17.2246
560	16.8996	15.9246	29.5743	16.5746	35.4241	15.9246	26.6493	12.6747	14.6246	17.2246
570	17.2246	15.5996	29.2493	16.8996	35.0991	15.9246	27.2993	13.3247	14.6246	17.2246
580	16.8996	15.9246	29.8993	16.5746	34.7741	15.9246	26.6493	12.3497	14.6246	17.2246
590	17.2246	15.9246	29.5743	16.8996	35.0991	15.9246	27.2993	12.6747	14.2996	17.2246
600	17.2246	15.5996	29.5743	16.8996	35.4241	15.9246	26.6493	13.6497	13.9747	17.2246
610	16.8996	15.5996	29.2493	16.8996	34.7741	15.9246	26.9743	12.3497	14.2996	17.2246
620	17.2246	15.5996	29.2493	16.5746	35.4241	15.9246	26.3243	12.6747	13.6497	17.2246
630	16.8996	15.5996	29.5743	16.8996	35.4241	15.9246	26.3243	12.9997	13.9747	16.8996
640	16.8996	15.9246	29.2493	16.5746	35.4241	16.2496	26.6493	12.3497	14.6246	17.2246
650	17.2246	15.9246	29.8993	16.8996	35.0991	15.5996	26.3243	12.9997	13.6497	17.2246
660	17.2246	15.9246	29.2493	16.8996	35.4241	15.9246	26.3243	12.3497	13.6497	16.8996
670	16.8996	15.9246	29.5743	16.5746	35.4241	15.9246	25.9994	12.6747	13.6497	16.8996
680	16.8996	15.9246	29.2493	16.5746	35.0991	15.9246	25.9994	12.0247	13.6497	17.2246
690	16.8996	15.9246	29.8993	16.5746	35.4241	15.9246	25.9994	12.9997	13.6497	16.5746
700	16.8996	15.5996	29.5743	16.5746	35.0991	16.2496	25.9994	12.9997	13.9747	16.5746
710	17.5496	15.9246	29.2493	16.5746	34.7741	15.5996	25.6744	12.9997	13.9747	16.5746
720	17.2246	15.9246	29.2493	16.5746	34.7741	15.9246	27.2993	12.9997	14.2996	16.5746
730	17.5496	15.5996	29.2493	16.5746	35.4241	15.9246	26.6493	12.6747	14.2996	16.8996
740	16.8996	15.9246	29.2493	16.8996	35.0991	15.9246	26.6493	12.9997	14.6246	16.5746
750	17.2246	15.9246	29.2493	16.5746	35.4241	15.9246	26.3243	12.6747	13.9747	16.5746
760	17.5496	15.9246	29.2493	16.5746	35.0991	16.2496	26.6493	12.3497	13.9747	16.8996
770	17.5496	15.5996	29.2493	16.5746	34.7741	15.9246	26.6493	12.6747	13.9747	16.5746
780	17.5496	15.9246	29.5743	16.8996	34.4491	15.9246	26.3243	13.3247	14.2996	16.5746
790	17.2246	15.9246	29.2493	16.8996	35.0991	15.9246	25.9994	13.3247	13.9747	16.5746
800	17.5496	15.9246	29.5743	16.8996	34.7741	15.9246	26.3243	12.6747	13.9747	16.5746
810	17.2246	15.9246	29.2493	16.8996	35.0991	15.9246	25.9994	12.9997	13.3247	16.2496
820	17.5496	15.9246	29.2493	16.5746	35.4241	16.5746	26.9743	13.3247	13.6497	16.5746
830	17.5496	15.9246	29.5743	16.5746	35.4241	15.9246	26.9743	12.0247	13.9747	16.8996
840	17.2246	15.9246	29.2493	16.8996	35.0991	15.5996	26.9743	12.6747	14.2996	16.8996
850	16.8996	15.9246	29.8993	16.8996	35.0991	15.9246	26.6493	12.9997	14.2996	16.8996
860	17.2246	15.5996	29.8993	16.8996	34.7741	15.9246	26.3243	12.6747	14.2996	17.2246
870	16.8996	15.5996	29.8993	16.8996	35.0991	16.2496	26.9743	12.9997	14.2996	16.8996
880	16.8996	15.9246	29.5743	16.8996	35.0991	15.9246	26.6493	13.3247	13.9747	17.2246
890	17.2246	15.9246	29.2493	16.8996	34.7741	15.9246	26.3243	12.0247	13.9747	17.2246
900	17.2246	15.9246	29.5743	16.8996	34.7741	15.9246	26.3243	12.6747	14.2996	16.8996
910	17.2246	15.5996	29.5743	16.8996	34.7741	15.9246	26.3243	12.0247	13.3247	16.8996
920	17.5496	15.9246	29.8993	16.8996	35.0991	15.9246	25.9994	12.6747	14.2996	17.2246
930	17.2246	15.9246	29.2493	16.8996	34.7741	15.5996	26.3243	12.0247	14.2996	17.2246
940	17.5496	15.9246	30.2242	17.2246	34.7741	15.9246	26.3243	12.9997	13.3247	17.2246
950	17.2246	15.9246	29.8993	16.8996	34.7741	15.5996	26.3243	12.0247	13.6497	17.2246
960	17.2246	15.9246	29.8993	16.8996	34.4491	16.5746	26.3243	12.9997	13.6497	17.2246
970	17.2246	15.9246	29.8993	16.8996	34.7741	15.9246	25.9994	12.3497	13.3247	17.2246
980	17.2246	15.9246	29.2493	16.8996	34.7741	15.9246	25.6744	13.6497	13.9747	17.5496
990	17.2246	15.9246	29.5743	16.8996	34.7741	15.5996	25.9994	13.6497	13.9747	17.2246
1000	17.2246	15.9246	29.5743	16.8996	34.7741	15.2746	25.6744	13.3247	13.9747	16.8996
1010	17.2246	15.5996	29.8993	16.8996	34.7741	15.9246	25.6744	12.6747	14.2996	16.5746
1020	17.2246	15.5996	29.8993	16.8996	34.7741	15.2746	25.9994	12.3497	14.6246	16.5746
1030	16.8996	15.9246	29.8993	16.8996	34.7741	15.2746	25.6744	12.6747	14.2996	16.5746
1040	16.8996	15.5996	29.8993	16.8996	34.7741	15.9246	25.9994	12.9997	13.9747	16.5746
1050	16.8996	15.5996	29.8993	16.8996	34.7741	15.2746	25.6744	12.6747	14.6246	16.5746
1060	16.8996	15.9246	29.5743	16.8996	35.0991	15.5996	25.3494	13.3247	14.6246	16.2496
1070	17.5496	15.5996	29.5743	16.8996	35.0991	15.5996	25.6744	12.6747	14.2996	16.2496
1080	17.5496	15.5996	29.5743	16.8996	34.7741	15.9246	25.6744	12.9997	14.9496	16.2496
1090	17.2246	15.5996	29.5743	16.8996	34.7741	15.2746	25.9994	12.9997	14.9496	16.2496
1100	17.2246	15.9246	29.8993	16.8996	35.0991	15.9246	25.6744	12.6747	15.2746	16.5746
1110	16.8996	15.5996	29.8993	17.2246	34.7741	15.5996	25.3494	12.6747	14.6246	16.5746
1120	16.5746	15.5996	29.8993	16.8996	34.7741	15.5996	25.9994	12.9997	14.6246	16.2496
1130	17.2246	15.9246	29.5743	16.8996	34.7741	15.5996	25.9994	12.3497	14.2996	16.2496
1140	16.8996	15.5996	29.8993	16.8996	34.7741	15.9246	25.6744	11.3747	14.2996	16.2496
1150	16.8996	15.9246	29.5743	17.2246	34.4491	15.5996	25.9994	12.0247	15.2746	16.2496
1160	16.5746	15.9246	29.8993	16.8996	34.7741	15.9246	25.9994	12.0247	15.5996	16.2496
1170	16.8996	15.9246	29.8993	17.2246	34.7741	15.5996	26.3243	11.6997	14.9496	15.9246
1180	16.8996	15.9246	29.8993	17.2246	34.7741	15.5996	26.3243	12.0247	14.6246	16.2496
1190	17.2246	15.5996	29.5743	17.2246	35.0991	15.5996	25.9994	12.0247	14.6246	16.2496
1200	17.2246	15.5996	29.5743	17.2246	35.7491	15.5996	25.6744	11.6997	13.9747	16.5746
1210	16.8996	15.9246	29.5743	16.5746	35.4241	15.5996	25.6744	12.0247	14.2996	16.2496
1220	16.8996	15.5996	29.8993	16.5746	35.0991	15.5996	25.9994	11.3747	13.6497	16.2496
1230	16.8996	15.9246	29.8993	16.5746	35.4241	15.2746	25.0244	12.0247	13.9747	16.2496
1240	16.5746	15.9246	29.8993	16.5746	35.4241	15.2746	25.9994	11.6997	14.9496	16.2496
1250	16.8996	15.9246	29.8993	17.5496	35.0991	15.2746	25.6744	12.0247	13.9747	16.5746
1260	16.8996	15.5996	29.5743	17.5496	34.7741	15.2746	25.6744	11.6997	13.9747	15.9246
1270	16.5746	15.5996	29.8993	17.5496	35.0991	15.9246	25.3494	12.0247	13.3247	15.9246
1280	16.8996	15.9246	29.8993	17.2246	35.4241	15.2746	25.3494	11.3747	14.2996	15.5996
1290	16.8996	15.9246	29.8993	16.8996	34.7741	15.5996	25.3494	12.0247	13.6497	16.2496
1300	16.5746	15.5996	29.8993	16.8996	34.7741	15.5996	25.6744	11.3747	13.6497	16.2496
1310	16.8996	15.5996	29.8993	16.5746	35.0991	15.5996	25.6744	11.6997	13.9747	16.5746
1320	16.8996	15.5996	29.8993	16.8996	35.0991	15.5996	25.3494	11.6997	13.9747	16.5746
1330	17.2246	15.9246	30.2242	16.5746	34.7741	15.5996	25.6744	11.6997	13.6497	16.5746
1340	16.8996	15.5996	30.2242	16.2496	35.0991	15.2746	25.0244	12.0247	13.9747	16.2496
1350	17.2246	15.5996	30.2242	16.2496	35.7491	15.5996	25.3494	12.3497	14.2996	15.9246
1360	17.2246	15.9246	30.2242	16.5746	35.4241	15.5996	25.0244	12.0247	13.6497	16.2496
1370	16.8996	15.5996	29.8993	16.5746	35.7491	15.5996	25.3494	12.3497	13.9747	16.2496
1380	16.8996	15.5996	29.8993	16.2496	36.0741	15.5996	25.0244	12.3497	14.2996	16.2496
1390	16.8996	15.9246	30.2242	16.5746	35.4241	15.5996	25.0244	12.0247	13.6497	16.5746
1400	16.8996	15.9246	29.8993	16.2496	35.4241	15.5996	25.3494	11.6997	14.2996	16.5746
1410	16.5746	15.5996	30.2242	16.2496	35.4241	15.5996	25.0244	11.6997	14.2996	16.5746
1420	16.8996	15.9246	29.8993	16.5746	35.7491	15.5996	24.3744	11.6997	13.9747	16.5746
1430	16.8996	15.5996	30.2242	16.5746	35.7491	15.5996	25.3494	11.6997	13.9747	16.2496
1440	16.8996	15.2746	29.8993	16.5746	35.7491	15.2746	25.0244	12.0247	13.9747	16.2496
1450	16.8996	15.5996	29.5743	16.8996	35.7491	15.9246	25.0244	12.0247	14.2996	16.2496
1460	17.2246	15.2746	29.8993	16.8996	35.7491	15.5996	25.3494	12.0247	14.2996	16.2496
1470	16.8996	15.5996	29.8993	17.2246	35.7491	15.5996	25.0244	12.0247	13.6497	16.2496
1480	17.2246	15.5996	29.8993	16.8996	35.4241	15.2746	25.3494	12.3497	13.9747	16.5746
1490	17.2246	15.2746	29.8993	16.2496	35.4241	15.5996	25.3494	12.0247	14.2996	15.9246
1500	17.2246	15.2746	29.8993	16.8996	35.7491	15.2746	25.6744	12.6747	13.6497	16.2496
1510	16.8996	15.5996	29.8993	16.5746	35.7491	15.2746	25.6744	12.0247	13.3247	16.2496
1520	17.5496	15.9246	29.8993	16.5746	35.7491	15.2746	25.3494	11.6997	13.6497	16.2496
1530	16.5746	15.5996	30.2242	16.5746	35.4241	15.5996	25.6744	12.0247	13.3247	16.2496
1540	17.2246	15.9246	30.2242	16.5746	35.4241	15.5996	25.6744	11.6997	14.6246	16.2496
1550	17.2246	15.9246	29.5743	16.5746	35.4241	15.5996	25.6744	11.6997	13.9747	16.2496
1560	16.8996	15.9246	30.2242	16.2496	35.0991	15.5996	25.3494	12.3497	13.9747	16.2496
1570	16.8996	15.9246	29.5743	16.2496	35.7491	15.9246	25.9994	12.3497	14.2996	15.9246
1580	17.2246	15.9246	30.2242	16.5746	35.4241	15.9246	25.6744	12.3497	12.9997	16.8996
1590	17.2246	15.9246	29.5743	16.2496	36.0741	15.5996	25.0244	11.0497	14.2996	16.5746
1600	17.2246	15.9246	29.8993	16.2496	35.4241	15.5996	25.3494	11.6997	14.9496	16.5746
1610	17.2246	15.9246	29.5743	16.5746	35.7491	15.5996	25.3494	12.6747	13.9747	16.2496
1620	17.2246	15.9246	29.5743	16.5746	35.4241	15.5996	25.0244	12.3497	13.9747	16.2496
1630	17.2246	15.9246	29.8993	16.2496	35.4241	15.5996	25.3494	11.6997	13.6497	16.2496
1640	17.2246	15.9246	29.8993	16.8996	35.4241	15.5996	25.0244	12.3497	14.2996	16.2496
1650	17.2246	15.9246	29.8993	16.5746	35.4241	15.2746	25.6744	12.0247	14.2996	16.2496
1660	17.2246	15.9246	29.2493	16.5746	35.4241	15.5996	25.6744	12.6747	13.6497	15.9246
1670	17.2246	15.9246	30.2242	16.5746	36.3991	15.5996	25.0244	12.3497	13.9747	15.9246
1680	16.8996	15.9246	30.2242	16.5746	35.4241	15.5996	24.3744	12.3497	13.6497	15.9246
1690	17.2246	15.9246	29.8993	16.5746	36.0741	15.5996	25.6744	12.3497	14.2996	15.9246
1700	17.2246	15.9246	29.8993	16.2496	35.0991	15.5996	25.3494	12.3497	13.9747	15.9246
1710	17.2246	15.9246	30.2242	16.2496	35.7491	15.5996	25.3494	12.6747	13.6497	16.2496
1720	17.2246	15.9246	29.5743	16.5746	35.7491	15.5996	25.3494	11.3747	13.9747	16.2496
1730	17.2246	15.9246	30.2242	16.8996	36.0741	15.5996	25.6744	12.0247	13.6497	15.9246
1740	16.8996	15.9246	30.2242	16.5746	35.4241	15.5996	25.6744	11.6997	14.2996	16.2496
1750	16.8996	15.9246	30.2242	17.2246	35.7491	15.9246	25.3494	11.3747	13.9747	16.2496
1760	16.8996	15.9246	30.2242	16.5746	35.7491	15.2746	25.6744	11.0497	14.2996	16.2496
1770	16.8996	15.9246	30.2242	17.5496	35.4241	15.2746	25.6744	11.6997	14.6246	15.9246
1780	16.8996	15.9246	29.8993	17.2246	36.0741	15.9246	25.6744	12.3497	14.6246	16.2496
1790	16.8996	15.9246	29.8993	16.8996	36.0741	15.2746	25.3494	12.0247	14.6246	16.2496
1800	16.8996	15.9246	30.2242	16.8996	35.4241	15.5996	24.6994	11.3747	14.2996	15.9246
1810	16.8996	15.9246	29.8993	17.2246	35.4241	15.5996	25.0244	12.6747	14.6246	16.2496
1820	16.8996	15.9246	30.2242	17.2246	35.7491	15.9246	25.6744	12.6747	13.9747	15.9246
1830	16.8996	15.9246	30.2242	16.8996	36.0741	15.2746	25.3494	12.0247	13.9747	16.2496
1840	16.8996	15.9246	29.8993	16.8996	36.3991	15.9246	25.6744	12.0247	14.6246	15.5996
1850	16.5746	15.9246	29.8993	17.2246	36.0741	15.5996	25.3494	12.3497	14.6246	15.9246
1860	16.5746	15.9246	30.2242	16.5746	36.0741	15.5996	24.3744	11.0497	14.6246	15.9246
1870	16.5746	15.9246	29.8993	16.8996	36.0741	15.5996	25.3494	12.9997	14.6246	15.9246
1880	16.8996	15.9246	29.8993	17.2246	36.3991	15.9246	25.0244	12.0247	14.6246	15.5996
1890	16.5746	15.9246	30.2242	17.5496	35.7491	15.9246	25.6744	12.3497	14.6246	15.9246
1900	16.5746	15.9246	30.2242	16.8996	36.0741	15.5996	25.0244	13.3247	14.6246	15.9246
1910	16.2496	16.2496	29.8993	16.8996	35.4241	15.9246	24.6994	12.9997	14.2996	16.2496
1920	16.8996	15.9246	30.2242	17.5496	36.0741	15.9246	25.0244	12.3497	14.2996	15.9246
1930	17.2246	15.9246	30.2242	17.5496	36.3991	15.9246	25.0244	12.6747	13.9747	15.9246
1940	16.5746	15.9246	29.8993	16.8996	35.7491	15.9246	25.6744	12.3497	14.2996	15.5996
1950	16.5746	15.9246	29.8993	17.5496	36.0741	15.5996	24.6994	12.3497	14.2996	16.5746
1960	16.8996	15.9246	29.8993	16.8996	35.7491	15.9246	24.6994	12.9997	14.2996	15.9246
1970	16.8996	15.9246	29.8993	17.2246	36.0741	15.5996	25.6744	12.0247	14.2996	16.2496
1980	17.5496	15.9246	29.8993	16.8996	35.7491	15.5996	25.6744	12.3497	13.9747	16.5746
1990	17.2246	15.9246	30.2242	16.2496	35.4241	15.2746	24.6994	12.6747	14.2996	16.2496
2000	16.5746	15.9246	29.8993	16.5746	35.7491	15.2746	25.3494	12.3497	13.3247	16.2496
2010	16.8996	15.9246	29.8993	17.2246	35.4241	15.5996	25.0244	12.9997	14.2996	16.5746
2020	16.8996	15.9246	29.8993	17.2246	35.7491	15.2746	24.6994	12.3497	14.9496	16.2496
2030	16.5746	15.9246	29.8993	16.5746	36.0741	15.5996	25.0244	12.3497	14.9496	16.5746
2040	16.5746	15.5996	29.8993	16.2496	36.0741	15.9246	25.3494	13.3247	14.9496	16.5746
2050	16.8996	15.9246	29.8993	16.5746	35.0991	15.9246	25.0244	12.9997	14.9496	16.2496
2060	17.2246	15.9246	29.8993	16.2496	36.0741	15.5996	25.0244	12.0247	14.9496	16.5746
2070	17.2246	15.9246	29.8993	16.5746	35.7491	15.5996	25.0244	13.3247	14.6246	16.2496
2080	17.2246	15.9246	29.8993	16.5746	35.7491	15.5996	24.6994	12.0247	14.6246	15.9246
2090	16.8996	15.9246	30.2242	16.2496	36.0741	15.5996	24.6994	12.6747	15.2746	16.2496

## Sheet: NS-398
Stimulation
Time	BGBV-308-0000	BGBV-311-0000	BGBV-342-0000	BGBV-343-0000	BGBV-350-0000
0	26.9743	16.8996	23.3994	29.8993	13.9747
10	26.6493	16.5746	23.3994	29.5743	13.6497
20	26.9743	16.5746	23.3994	29.5743	13.9747
30	27.2993	16.2496	23.3994	29.5743	13.9747
40	26.6493	16.2496	23.3994	31.1992	13.9747
50	26.9743	16.2496	23.3994	30.2242	13.9747
60	27.2993	16.2496	23.3994	29.5743	14.6246
70	27.2993	15.9246	23.3994	29.5743	14.6246
80	26.9743	16.5746	23.3994	30.2242	14.2996
90	26.9743	15.2746	23.3994	30.5492	14.6246
100	27.2993	15.5996	23.3994	30.2242	14.6246
110	26.9743	15.5996	23.3994	29.8993	14.6246
120	26.6493	16.2496	23.3994	29.5743	14.2996
130	26.9743	15.9246	23.3994	29.5743	15.2746
140	27.2993	16.2496	23.3994	29.5743	14.6246
150	26.9743	15.9246	23.3994	29.5743	14.6246
160	26.6493	16.2496	23.7244	29.5743	14.9496
170	26.6493	15.9246	23.7244	29.5743	14.2996
180	26.3243	15.9246	23.3994	29.2493	14.6246
190	27.2993	16.2496	23.3994	29.8993	14.6246
200	26.9743	16.5746	23.3994	29.5743	13.9747
210	26.3243	15.9246	23.7244	29.5743	14.6246
220	26.6493	15.9246	23.7244	30.2242	14.9496
230	26.6493	15.5996	23.0744	29.5743	14.2996
240	26.9743	15.5996	23.3994	29.5743	14.2996
250	26.6493	16.2496	23.7244	29.5743	14.2996
260	26.3243	15.5996	23.3994	29.2493	14.2996
270	26.6493	15.5996	23.0744	29.8993	14.2996
280	26.3243	16.5746	23.3994	30.2242	14.6246
290	26.3243	15.9246	23.3994	29.5743	14.2996
300	26.6493	14.9496	23.3994	29.5743	14.2996
310	25.9994	16.2496	23.3994	30.2242	14.6246
320	26.6493	15.2746	23.3994	29.5743	14.2996
330	26.3243	15.9246	23.3994	29.5743	14.6246
340	26.3243	16.2496	23.3994	29.5743	14.9496
350	26.6493	17.2246	23.7244	29.2493	14.6246
360	26.6493	16.2496	23.3994	29.5743	14.6246
370	26.3243	15.5996	23.0744	29.5743	14.2996
380	26.3243	15.5996	23.0744	30.2242	14.2996
390	26.6493	15.9246	23.0744	29.8993	13.9747
400	25.9994	15.5996	23.0744	29.5743	14.6246
410	26.3243	16.2496	23.3994	29.5743	13.9747
420	25.9994	15.9246	23.3994	29.8993	13.9747
430	26.9743	14.9496	23.0744	29.5743	14.2996
440	25.9994	15.5996	23.3994	29.8993	13.9747
450	26.3243	14.9496	23.0744	29.2493	13.6497
460	25.9994	15.5996	23.0744	29.5743	13.9747
470	25.9994	15.9246	23.0744	29.5743	14.6246
480	25.9994	15.5996	23.3994	28.9243	13.9747
490	25.6744	16.5746	23.3994	29.5743	14.2996
500	26.3243	16.2496	23.0744	29.5743	14.2996
510	25.9994	16.5746	23.0744	29.5743	14.2996
520	26.3243	16.2496	23.0744	29.5743	13.9747
530	25.6744	15.5996	23.3994	29.2493	13.9747
540	25.9994	16.2496	23.0744	29.8993	14.9496
550	25.6744	16.2496	23.3994	29.8993	14.6246
560	26.3243	15.2746	23.3994	29.5743	14.6246
570	25.9994	15.5996	23.3994	30.2242	13.6497
580	25.6744	16.5746	23.3994	30.2242	14.2996
590	25.3494	14.9496	23.3994	29.8993	14.2996
600	25.6744	15.5996	23.3994	29.8993	14.2996
610	25.3494	14.6246	23.3994	30.2242	14.6246
620	25.6744	15.5996	23.3994	30.2242	14.2996
630	25.6744	15.9246	23.3994	30.2242	14.2996
640	25.6744	15.2746	23.0744	29.8993	14.6246
650	26.3243	15.2746	23.3994	30.2242	14.2996
660	25.9994	15.5996	23.3994	29.8993	14.6246
670	25.6744	15.9246	23.3994	30.5492	14.6246
680	25.3494	15.2746	23.3994	30.5492	14.6246
690	25.6744	14.9496	23.3994	30.2242	13.9747
700	26.3243	14.6246	23.0744	30.5492	13.9747
710	25.9994	14.9496	23.3994	30.2242	13.9747
720	26.3243	15.5996	23.3994	30.2242	13.6497
730	25.9994	14.9496	23.3994	30.2242	13.9747
740	25.9994	15.2746	23.3994	29.8993	13.9747
750	25.9994	14.9496	23.0744	29.8993	13.9747
760	26.3243	15.2746	23.0744	29.8993	13.9747
770	25.9994	15.2746	23.0744	30.2242	13.6497
780	25.9994	15.5996	23.0744	29.8993	13.9747
790	25.6744	15.2746	23.3994	30.2242	13.9747
800	25.0244	15.5996	23.3994	29.8993	14.2996
810	25.0244	14.9496	23.0744	29.2493	13.9747
820	25.0244	15.9246	23.3994	29.8993	14.2996
830	24.6994	15.5996	23.3994	30.2242	14.2996
840	25.0244	15.5996	23.3994	29.5743	13.9747
850	25.6744	15.2746	23.3994	29.8993	13.9747
860	25.6744	15.5996	23.3994	30.2242	13.6497
870	25.6744	15.5996	23.3994	30.2242	13.6497
880	24.6994	15.2746	23.3994	29.8993	13.9747
890	25.3494	15.2746	23.0744	30.2242	14.2996
900	25.6744	14.9496	23.3994	29.8993	13.9747
910	25.6744	15.2746	23.3994	29.8993	14.6246
920	25.6744	15.2746	23.3994	29.8993	13.9747
930	25.3494	15.5996	23.0744	30.2242	13.9747
940	25.3494	15.5996	23.3994	30.2242	14.2996
950	25.0244	15.5996	23.3994	29.8993	14.6246
960	25.3494	15.9246	23.3994	30.2242	13.6497
970	25.6744	15.5996	23.0744	30.2242	14.2996
980	25.0244	15.2746	23.3994	29.8993	14.2996
990	25.6744	14.9496	23.0744	29.8993	13.6497
1000	25.3494	15.5996	23.3994	30.8742	14.6246
1010	25.0244	15.9246	23.3994	30.2242	14.2996
1020	25.0244	15.9246	23.0744	30.2242	14.6246
1030	25.3494	15.9246	23.0744	29.8993	13.9747
1040	25.6744	15.9246	23.3994	30.5492	13.9747
1050	25.3494	15.9246	23.3994	29.8993	13.9747
1060	25.9994	15.5996	23.3994	29.5743	13.9747
1070	25.6744	15.9246	23.3994	29.8993	14.6246
1080	25.0244	16.2496	23.0744	29.8993	14.2996
1090	25.6744	15.9246	23.3994	29.8993	14.6246
1100	25.3494	15.9246	23.0744	29.8993	14.6246
1110	25.6744	16.2496	23.0744	29.5743	14.6246
1120	25.3494	15.9246	23.3994	29.8993	14.2996
1130	25.3494	16.2496	23.3994	29.5743	14.6246
1140	25.0244	15.9246	23.0744	29.8993	14.2996
1150	25.6744	15.9246	23.0744	29.2493	14.6246
1160	25.0244	15.9246	23.3994	29.5743	14.2996
1170	25.3494	16.2496	23.0744	29.5743	14.9496
1180	25.0244	15.9246	23.0744	29.2493	14.2996
1190	25.3494	16.2496	23.3994	29.5743	14.2996
1200	24.0494	15.9246	23.3994	29.5743	14.2996
1210	25.3494	16.5746	23.0744	29.8993	14.6246
1220	25.0244	16.5746	23.0744	29.8993	14.2996
1230	25.0244	15.5996	23.3994	29.5743	15.2746
1240	24.6994	15.9246	23.0744	29.8993	14.2996
1250	24.6994	16.2496	22.7494	29.8993	14.6246
1260	25.6744	15.9246	23.3994	29.5743	14.6246
1270	25.6744	15.5996	23.3994	29.5743	14.6246
1280	25.6744	15.9246	23.0744	29.5743	14.2996
1290	25.0244	15.9246	23.0744	29.8993	14.9496
1300	25.0244	15.9246	22.7494	29.8993	14.2996
1310	24.6994	15.9246	23.3994	29.8993	14.6246
1320	24.3744	15.5996	23.3994	29.8993	14.2996
1330	24.3744	15.9246	23.0744	29.8993	14.6246
1340	25.3494	15.5996	23.3994	29.5743	14.2996
1350	25.0244	15.5996	23.0744	29.5743	14.2996
1360	24.6994	15.5996	23.0744	29.5743	14.2996
1370	24.3744	15.9246	23.0744	29.2493	13.9747
1380	25.3494	15.5996	23.0744	29.5743	14.2996
1390	24.6994	15.9246	23.0744	29.5743	13.9747
1400	25.6744	15.9246	23.0744	29.5743	13.9747
1410	25.0244	15.5996	23.0744	29.5743	14.2996
1420	25.3494	15.9246	23.0744	29.5743	13.9747
1430	25.0244	15.9246	23.0744	29.5743	13.9747
1440	25.0244	15.9246	23.0744	29.5743	13.9747
1450	25.0244	15.9246	23.0744	29.2493	13.6497
1460	24.6994	15.9246	23.3994	29.5743	14.2996
1470	25.3494	16.5746	23.0744	29.5743	14.2996
1480	24.6994	15.9246	23.0744	29.5743	13.9747
1490	25.0244	15.5996	23.0744	29.5743	13.9747
1500	25.3494	15.5996	23.0744	28.9243	13.9747
1510	25.0244	15.9246	23.0744	28.9243	13.9747
1520	24.3744	15.9246	23.0744	29.2493	14.2996
1530	24.3744	15.9246	23.0744	28.5993	13.9747
1540	24.3744	15.2746	23.0744	29.2493	13.9747
1550	24.3744	15.9246	23.0744	29.2493	14.2996
1560	24.6994	15.5996	23.0744	29.5743	14.2996
1570	25.0244	16.5746	23.0744	28.5993	14.2996
1580	25.0244	15.9246	23.0744	28.5993	14.2996
1590	25.0244	15.9246	23.0744	29.2493	14.2996
1600	24.0494	15.9246	23.0744	28.9243	13.9747
1610	24.3744	15.9246	23.0744	28.9243	14.2996
1620	24.6994	15.5996	23.0744	28.5993	13.9747
1630	24.0494	15.5996	23.0744	28.9243	14.6246
1640	24.3744	16.2496	23.0744	28.5993	14.9496
1650	24.6994	15.9246	23.0744	28.5993	14.6246
1660	24.6994	15.9246	23.0744	28.5993	15.2746
1670	24.6994	15.9246	22.7494	28.9243	14.6246
1680	24.3744	16.2496	22.7494	28.9243	14.6246
1690	24.6994	16.2496	23.0744	28.9243	14.6246
1700	24.0494	16.2496	22.7494	28.5993	14.2996
1710	25.0244	15.5996	23.0744	28.5993	14.6246
1720	24.3744	15.9246	23.0744	29.2493	14.2996
1730	25.0244	15.9246	23.0744	28.9243	14.2996
1740	24.3744	16.5746	22.7494	29.2493	14.2996
1750	24.0494	16.2496	22.7494	29.2493	14.6246
1760	24.3744	16.2496	22.7494	28.9243	14.2996
1770	24.6994	15.9246	22.7494	28.9243	14.2996
1780	24.0494	15.9246	23.0744	28.9243	13.9747
1790	24.3744	16.2496	23.0744	29.2493	13.9747
1800	24.0494	15.9246	23.0744	28.9243	13.9747
1810	25.0244	15.9246	23.0744	28.9243	13.9747
1820	24.3744	16.2496	23.0744	28.9243	14.2996
1830	24.6994	15.5996	23.0744	29.2493	13.9747
1840	24.3744	15.9246	23.0744	29.2493	13.3247
1850	24.0494	15.9246	23.0744	28.9243	14.2996
1860	24.3744	15.9246	23.0744	29.2493	14.2996
1870	24.3744	16.2496	23.0744	28.9243	14.2996
1880	24.6994	16.2496	23.0744	28.9243	13.6497
1890	24.6994	15.9246	22.7494	29.2493	14.2996
1900	24.0494	15.9246	22.7494	28.9243	14.9496
1910	24.0494	16.5746	22.7494	28.9243	14.6246
1920	24.3744	16.2496	22.7494	28.9243	14.6246
1930	23.7244	16.2496	23.0744	28.9243	14.2996
1940	24.0494	15.9246	23.0744	28.9243	13.9747
1950	24.3744	15.9246	22.7494	28.9243	13.9747
1960	24.0494	16.2496	22.7494	29.2493	14.6246
1970	24.6994	15.9246	22.7494	28.9243	14.6246
1980	24.0494	16.2496	22.7494	28.9243	14.2996
1990	25.0244	16.2496	22.7494	29.2493	14.6246
2000	25.0244	16.2496	22.7494	28.9243	14.6246
2010	24.3744	15.9246	22.7494	28.5993	14.2996
2020	24.3744	15.9246	22.7494	29.2493	13.6497
2030	24.3744	15.9246	22.7494	28.9243	13.9747
2040	24.3744	15.5996	23.0744	28.5993	13.9747
2050	24.3744	15.9246	23.0744	28.9243	14.2996
2060	23.7244	15.9246	22.7494	28.9243	13.9747
2070	24.6994	15.9246	22.7494	29.2493	14.2996
2080	24.6994	15.9246	22.7494	29.2493	14.2996
2090	25.3494	15.9246	22.7494	29.2493	14.2996

## Sheet: ONO-8130
Stimulation
Time	BGBV-293	BGBV-296	BGBV-297	BGBV-298	BGBV-301	BGBV-302	BGBV-304	BGBV-309	BGBV-310
0	14.9496	21.1245	21.1245	13.6497	17.2246	15.5996	18.1995	15.2746	20.1495
10	14.2996	21.1245	20.7995	13.6497	16.8996	15.5996	18.1995	15.2746	20.4745
20	14.2996	21.1245	20.7995	13.6497	17.2246	15.2746	17.8746	15.5996	20.1495
30	14.6246	21.1245	20.7995	13.3247	16.8996	15.5996	17.8746	15.5996	20.1495
40	14.6246	21.1245	20.7995	13.3247	17.2246	15.5996	18.1995	15.9246	20.1495
50	14.6246	21.1245	20.7995	13.6497	17.2246	15.5996	18.1995	15.9246	19.4995
60	14.6246	21.1245	20.7995	13.3247	17.2246	15.5996	17.8746	15.2746	19.8245
70	14.2996	21.1245	20.7995	13.6497	16.8996	15.5996	17.8746	15.2746	20.1495
80	14.6246	21.1245	20.1495	13.3247	17.2246	15.2746	17.8746	15.5996	19.8245
90	14.9496	20.4745	20.4745	13.6497	16.8996	15.9246	18.1995	15.5996	20.1495
100	14.2996	20.7995	21.1245	13.6497	16.8996	15.5996	18.1995	15.9246	19.8245
110	14.9496	20.1495	21.1245	13.6497	16.8996	15.5996	17.8746	15.5996	19.4995
120	14.2996	20.7995	21.1245	13.6497	17.2246	15.5996	17.8746	15.9246	19.8245
130	14.2996	21.1245	20.4745	13.6497	16.8996	15.9246	17.5496	15.5996	20.1495
140	14.6246	21.1245	20.7995	13.9747	16.5746	15.2746	17.5496	15.5996	19.8245
150	14.6246	20.7995	20.7995	13.9747	17.2246	15.5996	18.1995	15.2746	19.8245
160	14.6246	21.1245	20.4745	13.9747	17.2246	15.2746	17.8746	15.9246	19.4995
170	14.9496	21.1245	20.7995	13.6497	16.8996	15.2746	17.8746	15.9246	19.4995
180	14.6246	21.1245	20.4745	13.9747	17.2246	15.2746	18.5245	15.9246	20.1495
190	14.6246	20.7995	20.7995	13.6497	17.2246	15.5996	18.1995	16.2496	19.4995
200	14.9496	20.7995	20.4745	13.6497	16.8996	15.5996	17.5496	15.5996	19.1745
210	14.9496	20.7995	20.4745	13.6497	16.8996	15.2746	17.5496	15.9246	20.1495
220	15.2746	21.1245	20.4745	13.6497	17.2246	15.2746	18.1995	15.5996	19.4995
230	15.2746	21.1245	20.4745	13.3247	17.2246	15.5996	18.8495	15.2746	19.4995
240	14.9496	20.7995	20.7995	13.6497	16.5746	15.2746	18.1995	15.5996	19.1745
250	14.9496	21.1245	21.1245	13.6497	16.5746	15.2746	18.1995	15.5996	19.8245
260	15.5996	21.1245	20.7995	13.6497	16.5746	15.5996	17.8746	15.9246	19.8245
270	15.2746	21.1245	20.7995	13.6497	16.8996	15.2746	18.5245	15.5996	19.8245
280	15.5996	21.1245	20.1495	13.6497	16.8996	14.9496	17.8746	15.5996	19.1745
290	15.5996	21.1245	20.7995	13.6497	16.5746	15.2746	17.8746	15.9246	19.4995
300	15.2746	21.4495	20.4745	13.6497	16.5746	15.5996	18.5245	15.2746	19.4995
310	14.9496	21.1245	20.1495	13.3247	16.5746	15.5996	18.5245	15.9246	20.1495
320	15.2746	21.1245	20.7995	13.6497	16.8996	15.5996	18.5245	15.9246	19.4995
330	15.2746	21.1245	20.7995	13.3247	16.2496	15.5996	18.5245	15.5996	19.8245
340	15.9246	21.1245	20.7995	13.3247	16.8996	15.5996	18.5245	15.9246	19.8245
350	15.2746	21.1245	20.7995	13.3247	16.5746	14.9496	18.5245	15.9246	19.8245
360	14.2996	21.1245	20.7995	13.6497	16.8996	15.5996	18.5245	15.9246	19.4995
370	14.6246	21.1245	20.7995	13.6497	16.8996	15.5996	18.5245	15.5996	19.8245
380	14.6246	21.1245	20.4745	13.3247	17.2246	15.9246	18.5245	15.9246	19.8245
390	14.2996	20.7995	20.7995	13.6497	16.8996	15.5996	18.8495	16.2496	19.8245
400	14.6246	21.4495	21.1245	13.3247	17.2246	15.2746	18.5245	15.5996	19.8245
410	14.6246	20.4745	21.1245	13.3247	16.8996	15.5996	18.8495	15.5996	19.4995
420	14.6246	21.1245	20.1495	13.6497	16.5746	14.9496	18.5245	15.5996	19.1745
430	14.6246	20.4745	20.1495	13.3247	16.5746	15.5996	18.1995	15.5996	19.1745
440	14.6246	21.1245	20.1495	13.3247	16.8996	15.5996	18.1995	15.5996	19.8245
450	14.6246	21.1245	20.1495	13.3247	16.8996	15.5996	18.1995	15.9246	19.8245
460	14.6246	20.7995	20.7995	13.3247	16.8996	15.2746	18.1995	15.9246	20.1495
470	14.6246	21.1245	19.8245	12.9997	16.8996	15.2746	17.8746	15.9246	19.4995
480	14.2996	21.1245	20.7995	13.3247	16.8996	15.2746	18.5245	15.9246	19.4995
490	14.2996	20.7995	20.7995	13.3247	16.5746	15.5996	17.8746	15.9246	19.4995
500	14.2996	21.1245	20.1495	13.3247	16.5746	15.5996	18.8495	16.2496	19.1745
510	14.6246	21.1245	20.1495	13.3247	17.2246	15.5996	18.8495	15.9246	19.4995
520	14.2996	20.7995	20.4745	13.3247	16.8996	14.9496	18.8495	16.5746	19.4995
530	14.2996	21.1245	20.4745	12.9997	16.5746	15.2746	18.5245	16.5746	19.8245
540	14.6246	21.1245	19.8245	13.3247	16.5746	15.2746	18.5245	16.8996	19.4995
550	14.2996	21.1245	19.8245	12.9997	16.8996	15.9246	18.1995	15.9246	19.4995
560	14.6246	21.1245	20.4745	12.9997	16.8996	15.9246	17.8746	16.5746	19.4995
570	13.9747	21.1245	20.1495	13.3247	16.5746	14.9496	17.8746	16.8996	19.4995
580	14.2996	21.1245	20.1495	12.9997	16.2496	15.5996	17.8746	16.8996	19.4995
590	14.6246	21.1245	19.8245	12.9997	16.8996	15.5996	18.5245	16.5746	19.4995
600	14.6246	20.7995	20.1495	12.9997	16.8996	15.5996	18.5245	16.5746	19.4995
610	13.9747	20.7995	20.7995	12.9997	16.8996	16.2496	18.1995	15.5996	19.4995
620	14.2996	20.7995	20.4745	12.9997	17.2246	15.5996	18.1995	16.2496	19.8245
630	13.9747	21.1245	20.4745	12.9997	16.5746	15.9246	17.8746	16.2496	19.8245
640	13.9747	20.7995	20.4745	12.9997	16.5746	16.2496	17.8746	16.2496	19.1745
650	13.9747	20.7995	20.7995	12.6747	16.5746	15.9246	18.5245	15.9246	18.8495
660	14.2996	21.1245	20.4745	12.9997	16.2496	15.5996	18.5245	15.9246	19.4995
670	13.9747	21.1245	20.4745	12.9997	16.5746	16.2496	17.8746	16.2496	19.1745
680	13.9747	20.7995	20.4745	13.3247	16.2496	15.2746	18.8495	15.5996	19.4995
690	14.2996	20.7995	20.7995	12.9997	16.5746	15.2746	18.5245	15.2746	19.8245
700	13.9747	21.1245	21.1245	13.3247	16.2496	15.5996	18.8495	16.5746	19.4995
710	14.2996	21.1245	20.7995	12.9997	16.5746	15.9246	17.8746	15.9246	19.1745
720	14.2996	21.1245	20.1495	12.9997	16.8996	16.2496	18.5245	16.2496	18.8495
730	14.2996	21.1245	20.4745	13.3247	16.8996	15.5996	18.1995	16.5746	18.8495
740	14.2996	21.1245	20.7995	13.3247	16.8996	15.2746	18.5245	16.5746	18.5245
750	14.2996	21.4495	20.1495	12.9997	16.5746	15.9246	18.1995	16.8996	18.8495
760	14.2996	20.7995	20.4745	13.3247	16.8996	16.2496	18.5245	16.2496	19.8245
770	14.2996	21.1245	21.1245	12.9997	16.8996	16.2496	18.1995	16.5746	19.4995
780	14.2996	20.4745	20.7995	12.9997	16.8996	15.5996	18.5245	16.2496	19.1745
790	14.2996	20.7995	20.7995	13.3247	16.8996	16.2496	18.1995	16.2496	19.1745
800	13.9747	20.7995	20.4745	13.3247	17.2246	15.2746	18.1995	15.9246	18.8495
810	14.2996	21.1245	20.4745	13.3247	16.8996	15.5996	18.1995	16.5746	19.4995
820	14.2996	21.4495	20.1495	13.6497	16.2496	16.2496	18.1995	15.9246	19.1745
830	14.2996	20.7995	20.7995	13.3247	16.2496	15.9246	18.1995	16.2496	18.8495
840	14.2996	21.1245	20.4745	12.9997	16.5746	16.2496	18.1995	15.9246	19.1745
850	14.2996	20.7995	20.4745	13.3247	16.5746	15.9246	17.5496	16.2496	19.1745
860	14.2996	21.1245	20.4745	12.9997	16.2496	15.5996	18.1995	16.2496	18.8495
870	14.2996	20.7995	20.4745	12.9997	16.5746	15.5996	19.1745	15.9246	19.4995
880	14.2996	20.7995	20.7995	13.3247	16.5746	16.2496	17.8746	16.2496	19.4995
890	14.2996	20.7995	20.4745	13.3247	16.5746	16.2496	18.1995	16.5746	19.1745
900	14.2996	20.7995	20.4745	13.3247	16.5746	15.9246	18.5245	16.2496	19.1745
910	14.2996	20.7995	20.4745	13.3247	16.5746	16.2496	18.1995	16.2496	18.8495
920	14.2996	21.4495	20.4745	13.3247	16.5746	16.2496	18.8495	16.2496	19.4995
930	13.9747	21.1245	20.7995	12.9997	16.5746	16.2496	18.8495	16.5746	18.8495
940	14.2996	21.4495	20.7995	13.3247	16.2496	15.9246	18.1995	16.5746	18.8495
950	14.2996	21.1245	21.1245	12.9997	16.5746	15.9246	18.1995	16.8996	19.1745
960	14.2996	20.7995	20.4745	12.9997	16.5746	15.9246	18.5245	16.5746	19.1745
970	14.2996	21.4495	20.4745	13.3247	16.5746	16.5746	18.1995	16.5746	19.1745
980	14.2996	20.7995	20.4745	13.6497	16.8996	15.9246	18.8495	16.8996	19.1745
990	14.2996	21.1245	20.4745	13.6497	16.5746	16.2496	18.8495	16.2496	18.8495
1000	14.2996	21.1245	20.7995	13.3247	15.9246	15.9246	18.5245	16.5746	18.8495
1010	13.9747	21.1245	20.7995	13.3247	16.5746	16.5746	18.1995	16.5746	19.1745
1020	14.2996	20.7995	20.7995	13.3247	16.2496	15.9246	17.8746	16.2496	18.8495
1030	14.2996	21.1245	20.7995	13.6497	16.2496	16.2496	17.8746	15.9246	19.1745
1040	14.2996	21.1245	20.1495	13.3247	16.5746	15.9246	18.5245	16.2496	18.8495
1050	14.2996	21.1245	20.1495	13.3247	16.8996	15.5996	18.1995	16.2496	19.1745
1060	14.2996	20.7995	20.4745	13.3247	16.5746	15.9246	18.1995	16.8996	19.4995
1070	14.2996	20.7995	20.1495	13.3247	16.2496	16.5746	17.8746	15.9246	19.1745
1080	14.2996	20.7995	21.1245	13.3247	16.2496	16.2496	18.1995	16.2496	19.1745
1090	14.2996	21.1245	20.7995	13.3247	16.2496	16.2496	18.5245	15.9246	19.1745
1100	13.9747	21.1245	20.7995	13.3247	16.8996	15.9246	17.8746	16.8996	19.4995
1110	14.2996	20.7995	20.4745	13.3247	16.8996	16.8996	18.1995	15.9246	19.1745
1120	13.9747	20.7995	20.4745	13.3247	16.8996	15.9246	17.8746	16.2496	19.1745
1130	13.9747	20.4745	21.1245	12.9997	16.5746	15.9246	17.5496	15.9246	19.4995
1140	14.2996	21.1245	20.4745	13.3247	17.2246	16.2496	17.8746	16.5746	19.4995
1150	14.2996	20.7995	20.7995	13.3247	16.2496	15.9246	17.5496	16.8996	18.8495
1160	14.2996	21.1245	20.4745	13.3247	16.8996	16.8996	18.1995	16.5746	19.4995
1170	14.2996	21.1245	20.4745	13.3247	16.2496	15.9246	17.8746	16.8996	19.8245
1180	13.9747	20.7995	20.4745	13.3247	16.5746	15.5996	18.1995	16.5746	19.4995
1190	13.9747	21.1245	20.7995	12.9997	16.2496	16.2496	17.5496	16.2496	19.1745
1200	13.9747	21.1245	20.7995	12.9997	16.5746	15.5996	17.5496	16.8996	19.4995
1210	13.9747	20.7995	20.7995	13.3247	16.8996	15.5996	17.5496	16.5746	19.8245
1220	14.2996	20.7995	21.1245	13.3247	16.2496	16.2496	17.8746	16.5746	19.4995
1230	13.9747	20.7995	20.7995	12.9997	16.2496	15.9246	17.8746	16.2496	19.4995
1240	14.2996	20.1495	20.7995	13.3247	16.5746	16.5746	17.8746	16.2496	19.1745
1250	14.2996	20.7995	21.1245	12.6747	16.2496	15.5996	17.8746	16.5746	19.4995
1260	14.2996	20.7995	20.7995	12.9997	16.2496	15.5996	18.1995	16.5746	19.1745
1270	14.2996	20.7995	20.7995	12.9997	16.5746	16.5746	18.1995	16.5746	19.4995
1280	14.2996	20.7995	20.4745	12.6747	16.5746	15.5996	17.8746	16.8996	19.1745
1290	14.2996	20.4745	21.1245	12.9997	16.8996	16.2496	17.8746	16.2496	19.1745
1300	13.9747	21.1245	20.7995	12.9997	16.5746	16.5746	17.8746	15.9246	19.4995
1310	14.2996	21.1245	21.1245	12.9997	15.9246	16.8996	17.8746	16.2496	19.4995
1320	14.2996	20.7995	20.7995	12.6747	15.9246	16.2496	18.5245	16.2496	19.4995
1330	14.2996	20.4745	20.4745	12.6747	16.5746	15.5996	17.8746	16.5746	19.1745
1340	14.2996	21.1245	20.7995	12.9997	16.5746	16.2496	18.8495	16.2496	19.1745
1350	13.9747	21.1245	21.1245	12.6747	15.9246	15.9246	18.1995	15.9246	18.5245
1360	13.9747	20.7995	20.7995	12.9997	16.2496	16.2496	17.8746	16.2496	19.4995
1370	14.2996	21.4495	21.1245	12.6747	16.5746	16.5746	17.8746	16.2496	19.1745
1380	14.2996	21.7745	20.7995	12.6747	16.5746	15.9246	17.8746	16.5746	18.8495
1390	13.9747	21.1245	21.1245	12.9997	16.2496	16.2496	18.5245	16.5746	18.8495
1400	13.9747	21.1245	20.7995	12.6747	16.2496	16.2496	18.1995	16.5746	18.8495
1410	13.9747	20.7995	20.7995	13.3247	16.2496	16.2496	17.8746	16.5746	18.8495
1420	14.2996	21.1245	21.1245	12.6747	16.2496	16.5746	18.1995	16.2496	19.1745
1430	13.9747	21.4495	21.1245	12.9997	16.2496	16.2496	17.8746	16.2496	18.5245
1440	13.6497	21.4495	20.7995	12.9997	16.5746	16.2496	17.8746	16.2496	18.8495
1450	14.2996	21.1245	21.1245	12.6747	16.5746	16.5746	18.1995	16.2496	18.8495
1460	13.9747	21.1245	21.1245	12.6747	16.2496	16.2496	17.5496	16.2496	19.4995
1470	13.9747	21.4495	21.1245	12.6747	16.2496	16.2496	17.5496	16.5746	18.8495
1480	13.9747	21.4495	21.1245	12.6747	16.5746	15.9246	17.8746	16.5746	19.1745
1490	13.6497	20.7995	21.1245	12.9997	16.5746	16.2496	18.5245	16.5746	19.1745
1500	13.6497	21.1245	21.4495	12.9997	16.5746	15.9246	18.1995	16.5746	18.5245
1510	13.9747	21.1245	20.7995	12.6747	16.2496	15.2746	18.1995	16.8996	18.8495
1520	14.2996	20.4745	21.4495	12.3497	16.2496	16.2496	17.8746	16.5746	19.1745
1530	13.6497	21.1245	21.1245	13.3247	16.5746	16.2496	17.5496	16.8996	18.5245
1540	13.9747	21.1245	21.1245	12.9997	15.9246	16.8996	17.8746	16.5746	18.5245
1550	13.9747	21.4495	21.1245	12.9997	15.9246	16.5746	17.5496	16.2496	18.5245
1560	13.9747	21.1245	21.1245	12.9997	16.5746	16.2496	18.5245	16.8996	18.8495
1570	13.9747	21.1245	20.7995	12.6747	16.2496	16.2496	17.8746	16.2496	18.5245
1580	13.9747	21.1245	21.1245	12.6747	16.2496	15.9246	18.1995	16.5746	18.8495
1590	13.9747	20.7995	21.1245	12.6747	15.9246	15.9246	18.1995	16.8996	18.5245
1600	13.9747	20.7995	21.1245	12.6747	16.2496	16.2496	18.8495	16.8996	18.8495
1610	13.9747	21.1245	21.4495	12.6747	16.2496	16.5746	18.1995	16.5746	18.8495
1620	13.9747	21.4495	20.7995	12.6747	16.2496	16.5746	18.8495	16.5746	18.8495
1630	13.6497	21.4495	21.1245	12.6747	16.2496	16.2496	17.8746	16.5746	19.1745
1640	13.9747	21.4495	21.1245	12.3497	16.2496	16.8996	18.5245	16.8996	19.1745
1650	13.9747	21.1245	21.1245	12.6747	16.5746	16.2496	17.8746	16.5746	19.1745
1660	13.9747	21.4495	21.1245	12.3497	16.2496	16.2496	17.8746	16.5746	18.8495
1670	13.9747	21.4495	21.1245	12.6747	16.2496	16.5746	18.5245	16.5746	18.5245
1680	13.9747	21.4495	21.1245	12.6747	16.5746	16.2496	18.5245	16.5746	18.8495
1690	13.9747	21.7745	20.7995	12.9997	16.2496	16.5746	18.8495	16.5746	19.1745
1700	13.9747	21.4495	21.1245	12.9997	16.2496	16.5746	18.5245	16.2496	18.8495
1710	13.9747	21.1245	21.1245	12.9997	16.2496	15.5996	18.8495	17.2246	18.8495
1720	13.9747	20.4745	21.1245	12.6747	15.9246	16.5746	18.1995	16.8996	19.1745
1730	13.9747	21.4495	20.7995	13.3247	15.9246	16.8996	17.8746	16.2496	18.5245
1740	13.9747	21.4495	20.7995	12.9997	16.5746	16.2496	18.5245	15.9246	19.1745
1750	13.9747	21.1245	20.7995	12.9997	16.2496	16.2496	18.1995	16.2496	18.5245
1760	13.9747	21.4495	20.7995	12.9997	16.2496	15.9246	17.8746	16.2496	18.8495
1770	13.9747	21.4495	21.1245	13.3247	16.5746	15.5996	18.1995	16.8996	18.5245
1780	13.9747	21.1245	20.7995	12.9997	16.2496	16.2496	18.8495	16.5746	18.8495
1790	13.9747	21.4495	21.1245	12.9997	16.5746	16.2496	18.1995	16.5746	18.5245
1800	13.6497	21.1245	21.1245	12.9997	16.2496	15.2746	18.5245	16.2496	18.5245
1810	13.6497	21.1245	20.7995	12.9997	16.2496	15.5996	17.8746	16.2496	19.4995
1820	13.6497	21.1245	20.7995	12.9997	15.9246	16.5746	18.1995	16.5746	18.8495
1830	13.9747	21.1245	20.7995	12.9997	15.9246	15.9246	18.1995	16.5746	18.5245
1840	13.9747	20.7995	21.1245	13.3247	16.2496	16.8996	17.8746	15.9246	18.8495
1850	13.9747	21.1245	21.4495	12.9997	16.2496	15.9246	17.8746	16.2496	18.8495
1860	13.6497	20.7995	21.7745	12.9997	15.5996	16.2496	18.8495	16.2496	18.5245
1870	13.6497	20.4745	21.1245	13.3247	15.9246	15.9246	18.5245	16.2496	18.8495
1880	13.6497	21.1245	21.4495	13.3247	16.2496	16.5746	18.8495	16.2496	18.5245
1890	13.6497	20.4745	20.4745	13.3247	16.2496	16.2496	18.1995	16.2496	18.5245
1900	13.6497	20.7995	21.1245	13.3247	16.2496	15.9246	18.1995	15.9246	18.5245
1910	13.6497	21.1245	20.7995	13.3247	16.2496	16.2496	18.5245	15.5996	19.1745
1920	13.6497	20.7995	20.4745	13.3247	16.2496	15.9246	18.1995	16.2496	18.8495
1930	13.6497	20.4745	20.7995	13.3247	15.9246	16.2496	18.5245	16.2496	18.8495
1940	13.6497	20.7995	20.4745	13.3247	15.9246	16.5746	18.1995	16.5746	19.1745
1950	13.6497	20.7995	21.1245	13.3247	16.2496	15.9246	18.1995	16.5746	18.8495
1960	13.6497	20.7995	20.7995	13.3247	16.5746	15.9246	18.5245	16.8996	18.8495
1970	13.6497	20.4745	20.7995	13.3247	16.2496	16.2496	18.1995	16.2496	18.1995
1980	13.6497	20.4745	20.4745	13.3247	15.9246	15.9246	18.1995	16.5746	18.8495
1990	13.6497	20.4745	20.7995	13.3247	16.2496	15.9246	18.5245	16.2496	18.8495
2000	13.6497	20.4745	21.1245	13.3247	16.2496	16.2496	18.1995	15.9246	19.1745
2010	13.6497	21.1245	21.1245	13.3247	16.2496	16.2496	18.1995	15.9246	18.5245
2020	13.6497	20.7995	20.7995	13.3247	16.2496	15.5996	18.1995	15.9246	18.8495
2030	13.6497	21.1245	21.1245	13.6497	16.2496	16.2496	18.1995	15.5996	18.1995
2040	13.6497	20.7995	20.7995	13.3247	16.2496	15.9246	17.8746	16.2496	18.5245
2050	13.6497	20.7995	20.7995	13.3247	16.2496	16.5746	18.1995	16.2496	18.5245
2060	13.6497	20.4745	21.4495	13.3247	16.2496	15.9246	18.1995	16.2496	18.5245
2070	13.6497	20.7995	20.7995	13.3247	16.2496	15.9246	18.1995	16.2496	18.5245
2080	13.6497	20.1495	21.1245	12.9997	16.2496	15.5996	18.5245	16.5746	18.1995
2090	13.6497	21.1245	20.7995	13.6497	15.9246	15.9246	17.8746	16.2496	18.8495

## Sheet: L-798,106
Stimulation
Time	BGBV-457	BGBV-458	BGBV-459	BGBV-460	BGBV-461	BGBV-462	BGBV-463	BGBV-464	BGBV-466
0	20.1495	14.6246	35.7491	14.6246	21.4495	17.5496	29.5743	23.0744	14.6246
10	20.1495	14.9496	35.7491	14.2996	21.4495	17.5496	29.5743	23.0744	13.9747
20	19.4995	14.6246	35.4241	14.2996	21.4495	17.8746	29.5743	23.0744	13.6497
30	20.4745	14.6246	35.7491	13.9747	21.4495	17.8746	30.2242	23.0744	13.6497
40	20.4745	14.6246	35.4241	14.2996	21.4495	17.8746	30.2242	23.0744	13.9747
50	20.1495	14.9496	35.4241	14.2996	21.7745	17.8746	29.5743	22.7494	13.3247
60	20.4745	14.6246	34.7741	14.2996	21.7745	17.2246	29.2493	23.0744	13.6497
70	20.4745	15.2746	35.0991	14.2996	21.4495	17.5496	29.8993	22.7494	13.6497
80	20.4745	14.6246	35.4241	14.2996	21.4495	17.2246	29.5743	23.3994	12.9997
90	20.4745	14.2996	35.4241	14.6246	21.7745	17.2246	29.8993	23.0744	13.3247
100	20.4745	14.6246	35.4241	14.2996	21.7745	17.2246	29.5743	23.0744	12.9997
110	20.4745	14.6246	35.0991	14.2996	21.7745	18.1995	29.5743	23.3994	13.3247
120	21.1245	14.6246	35.0991	14.2996	21.7745	17.8746	29.8993	23.0744	13.3247
130	20.1495	14.2996	35.4241	14.2996	22.0994	18.5245	29.5743	23.0744	12.9997
140	20.7995	14.2996	35.7491	13.9747	21.7745	18.1995	29.8993	23.0744	13.3247
150	19.8245	14.6246	35.0991	14.6246	22.0994	17.8746	29.5743	23.3994	12.3497
160	20.7995	14.2996	35.4241	14.6246	21.7745	18.1995	29.5743	23.0744	12.6747
170	20.4745	14.6246	35.0991	14.6246	22.0994	17.2246	30.2242	23.0744	12.3497
180	20.1495	13.9747	35.7491	14.2996	21.7745	18.1995	29.5743	23.3994	12.0247
190	19.8245	14.6246	35.4241	14.2996	21.7745	17.2246	29.8993	23.0744	12.3497
200	20.1495	14.2996	35.0991	14.6246	21.7745	17.5496	29.8993	22.7494	14.2996
210	20.7995	14.6246	35.7491	14.2996	21.7745	17.2246	29.5743	23.3994	14.2996
220	21.1245	14.6246	36.0741	14.2996	21.7745	17.2246	29.2493	23.0744	13.3247
230	20.4745	14.6246	36.0741	14.2996	22.0994	17.5496	29.8993	23.0744	13.6497
240	21.1245	14.2996	35.7491	14.6246	21.7745	17.5496	29.5743	23.3994	12.9997
250	20.4745	14.6246	35.7491	14.6246	21.4495	17.8746	29.8993	23.7244	13.3247
260	20.1495	14.2996	35.4241	14.2996	21.7745	17.8746	29.5743	23.3994	13.3247
270	20.7995	14.6246	35.7491	14.2996	21.7745	18.1995	29.5743	23.3994	13.3247
280	20.7995	14.2996	35.4241	14.6246	21.7745	17.8746	29.2493	23.0744	12.6747
290	21.1245	14.6246	35.7491	14.2996	21.4495	17.8746	29.5743	23.0744	13.6497
300	20.4745	14.6246	36.0741	14.6246	21.4495	17.8746	29.5743	23.7244	13.6497
310	20.4745	14.6246	36.0741	14.2996	21.7745	17.5496	29.8993	23.3994	13.6497
320	20.7995	14.2996	35.4241	14.6246	21.7745	17.8746	29.5743	23.3994	12.9997
330	21.4495	14.6246	35.4241	14.6246	21.7745	17.8746	30.5492	23.0744	13.6497
340	20.7995	14.6246	36.0741	14.6246	21.7745	17.5496	30.5492	23.3994	13.3247
350	21.7745	14.6246	35.7491	14.2996	22.0994	17.5496	30.8742	23.0744	12.9997
360	21.7745	14.6246	35.7491	14.2996	21.7745	18.5245	31.1992	23.3994	12.9997
370	20.7995	14.6246	35.7491	14.2996	21.7745	18.5245	30.2242	23.3994	12.9997
380	20.7995	14.2996	36.0741	13.9747	21.7745	17.5496	31.1992	23.0744	12.9997
390	20.4745	14.2996	35.4241	14.6246	21.7745	18.8495	30.2242	23.0744	12.3497
400	20.7995	14.2996	35.4241	14.2996	22.0994	19.1745	31.1992	23.0744	12.9997
410	20.4745	14.6246	35.4241	14.2996	22.0994	17.8746	30.5492	23.3994	13.6497
420	20.7995	14.6246	36.0741	13.9747	22.0994	17.8746	30.5492	22.7494	13.6497
430	20.7995	14.6246	36.0741	14.2996	21.7745	17.5496	30.2242	23.0744	13.3247
440	21.1245	14.2996	35.7491	14.2996	21.7745	17.8746	31.5242	23.3994	13.9747
450	21.1245	14.6246	35.4241	14.2996	22.0994	17.5496	31.1992	23.0744	13.6497
460	21.1245	14.6246	35.7491	14.2996	22.0994	17.5496	30.8742	23.0744	12.6747
470	21.4495	14.2996	35.7491	14.2996	22.0994	18.1995	30.8742	23.0744	13.3247
480	20.4745	14.2996	35.7491	14.2996	21.7745	18.8495	31.1992	23.0744	13.3247
490	21.1245	14.2996	35.4241	14.6246	22.0994	18.5245	30.2242	23.3994	13.6497
500	20.7995	14.2996	35.7491	14.2996	21.7745	17.8746	29.8993	23.0744	13.6497
510	21.1245	14.2996	36.0741	14.9496	21.7745	18.1995	30.8742	23.0744	12.9997
520	20.7995	14.2996	35.7491	14.9496	22.0994	18.1995	29.8993	23.3994	13.6497
530	20.7995	14.6246	36.0741	15.2746	21.7745	18.8495	30.5492	23.3994	13.9747
540	21.1245	14.6246	35.7491	14.2996	22.0994	18.1995	29.5743	23.7244	13.6497
550	20.7995	14.6246	36.0741	14.2996	22.0994	18.1995	30.5492	23.3994	13.3247
560	21.1245	14.2996	35.4241	14.2996	22.0994	19.1745	29.8993	23.0744	13.3247
570	20.7995	14.2996	35.0991	14.6246	22.0994	18.5245	29.8993	23.0744	12.9997
580	21.7745	14.2996	35.7491	14.2996	21.7745	17.2246	29.8993	23.3994	13.6497
590	21.7745	14.2996	35.4241	14.6246	22.0994	18.5245	29.8993	23.3994	13.6497
600	21.7745	14.2996	35.0991	13.9747	22.0994	18.8495	29.5743	23.3994	13.6497
610	21.1245	14.6246	35.0991	14.2996	22.0994	18.1995	29.5743	23.3994	13.6497
620	21.1245	14.2996	35.0991	14.6246	22.0994	17.8746	30.2242	23.0744	13.6497
630	20.4745	13.9747	35.7491	14.2996	22.0994	18.5245	30.5492	23.3994	13.3247
640	20.7995	14.2996	35.4241	14.6246	22.0994	17.8746	30.5492	23.0744	12.9997
650	21.1245	14.6246	35.4241	14.6246	22.0994	17.8746	29.5743	23.0744	13.6497
660	21.4495	14.6246	34.7741	14.6246	21.7745	17.8746	29.8993	23.3994	12.3497
670	21.1245	14.2996	35.4241	14.2996	22.0994	17.5496	29.5743	22.7494	13.3247
680	20.7995	14.2996	35.4241	14.6246	22.0994	18.5245	29.8993	23.3994	13.9747
690	21.4495	14.2996	35.7491	14.6246	22.4244	17.8746	29.5743	23.0744	13.6497
700	22.0994	14.2996	35.4241	14.2996	21.7745	17.8746	29.5743	23.0744	13.6497
710	21.4495	14.2996	35.0991	14.6246	22.0994	18.1995	29.5743	23.3994	13.9747
720	21.4495	14.2996	35.4241	14.2996	22.0994	18.5245	29.8993	23.0744	13.9747
730	22.0994	14.2996	35.4241	14.6246	22.0994	18.1995	29.8993	23.0744	13.9747
740	21.4495	14.2996	35.4241	14.6246	21.7745	17.8746	29.8993	23.0744	13.3247
750	20.7995	14.2996	35.0991	14.6246	21.7745	18.1995	29.5743	23.3994	13.9747
760	21.4495	14.2996	35.7491	14.9496	22.0994	18.8495	29.8993	23.0744	13.6497
770	21.1245	14.2996	35.7491	14.6246	22.0994	18.5245	29.2493	23.0744	13.6497
780	21.4495	14.2996	35.0991	14.6246	22.0994	17.8746	30.2242	23.3994	13.9747
790	21.7745	14.2996	35.0991	14.9496	22.0994	17.8746	29.5743	23.0744	14.2996
800	21.4495	14.2996	36.0741	14.9496	22.0994	18.5245	29.8993	23.3994	13.6497
810	21.4495	14.2996	35.4241	14.6246	22.0994	18.5245	30.2242	23.0744	13.6497
820	21.1245	13.9747	35.7491	14.6246	22.0994	18.1995	29.5743	23.0744	13.6497
830	21.4495	14.2996	36.0741	14.2996	22.0994	19.1745	30.2242	23.3994	12.9997
840	21.4495	14.2996	35.0991	14.9496	22.0994	17.8746	29.8993	23.3994	13.6497
850	21.1245	13.9747	35.7491	14.9496	22.0994	18.5245	30.2242	23.3994	13.3247
860	21.4495	13.9747	36.0741	14.6246	22.0994	17.8746	29.8993	23.0744	12.9997
870	21.4495	13.9747	35.7491	14.6246	22.0994	18.5245	29.8993	23.3994	12.6747
880	21.4495	13.9747	35.4241	14.6246	22.4244	18.1995	29.5743	23.3994	13.6497
890	20.4745	13.9747	36.0741	14.9496	22.4244	17.8746	30.2242	23.7244	12.6747
900	22.0994	13.9747	36.0741	14.9496	22.0994	18.5245	29.8993	23.3994	12.9997
910	21.4495	13.6497	35.7491	14.6246	22.4244	17.8746	30.2242	23.3994	12.9997
920	20.7995	13.6497	35.7491	14.6246	21.7745	18.1995	29.5743	23.3994	13.3247
930	20.7995	13.9747	36.0741	14.9496	22.0994	17.8746	30.2242	23.0744	12.9997
940	20.7995	13.6497	36.0741	14.9496	22.0994	17.8746	30.2242	23.0744	12.0247
950	20.4745	13.9747	35.7491	14.9496	22.0994	18.1995	29.8993	23.0744	12.3497
960	21.1245	13.9747	36.0741	14.6246	21.7745	17.8746	30.2242	23.0744	13.3247
970	21.7745	13.9747	36.3991	14.6246	22.0994	18.5245	29.5743	23.3994	13.3247
980	21.1245	13.9747	36.3991	14.6246	22.0994	18.5245	30.2242	23.3994	13.9747
990	22.0994	13.9747	36.3991	14.6246	22.0994	18.1995	29.5743	23.0744	13.6497
1000	21.4495	13.9747	36.0741	14.6246	21.7745	18.5245	29.8993	23.3994	13.3247
1010	21.7745	13.6497	36.3991	14.6246	21.7745	18.5245	29.5743	22.7494	13.3247
1020	21.1245	13.9747	36.0741	14.2996	22.0994	18.5245	29.8993	23.0744	13.6497
1030	21.1245	13.9747	36.0741	14.9496	22.0994	18.5245	30.2242	23.0744	13.6497
1040	21.1245	13.6497	36.0741	14.6246	22.0994	18.5245	29.8993	23.0744	13.3247
1050	21.1245	13.6497	36.0741	14.6246	22.0994	18.5245	29.8993	23.3994	13.3247
1060	21.4495	13.6497	36.7241	14.9496	22.4244	19.1745	29.5743	23.3994	13.9747
1070	21.4495	13.6497	35.7491	14.6246	22.0994	18.8495	29.5743	23.3994	13.6497
1080	20.7995	13.6497	36.3991	14.6246	21.7745	18.1995	29.5743	23.3994	13.6497
1090	20.7995	13.6497	36.3991	14.9496	22.0994	18.5245	29.8993	23.3994	13.9747
1100	20.7995	13.6497	36.3991	14.6246	22.0994	18.5245	29.8993	23.7244	13.3247
1110	20.7995	13.3247	35.7491	14.6246	22.0994	19.1745	30.2242	23.3994	13.6497
1120	22.0994	13.3247	36.0741	14.9496	22.4244	18.5245	29.5743	23.3994	13.9747
1130	21.1245	12.9997	35.7491	14.6246	22.0994	18.8495	29.8993	23.0744	14.2996
1140	21.1245	13.3247	35.4241	14.9496	22.4244	18.1995	30.5492	23.3994	13.9747
1150	20.7995	13.3247	36.0741	14.9496	21.7745	17.8746	30.2242	23.3994	13.9747
1160	20.7995	13.3247	35.7491	14.6246	22.0994	17.2246	29.8993	23.0744	14.2996
1170	20.4745	12.9997	36.0741	14.9496	22.0994	17.8746	30.5492	23.7244	14.6246
1180	21.1245	13.3247	36.0741	14.6246	22.0994	17.8746	29.8993	23.3994	14.2996
1190	20.7995	13.3247	35.4241	14.9496	22.0994	18.1995	29.5743	23.7244	13.6497
1200	20.4745	13.3247	36.7241	13.9747	22.0994	18.1995	29.5743	23.0744	14.2996
1210	20.4745	13.3247	36.0741	14.9496	22.0994	18.8495	29.5743	23.3994	14.6246
1220	21.1245	13.3247	35.7491	14.2996	21.7745	18.1995	29.8993	23.3994	14.2996
1230	21.1245	12.9997	36.0741	14.2996	21.7745	17.8746	30.2242	23.3994	14.6246
1240	21.1245	13.3247	36.3991	14.6246	22.7494	18.1995	30.2242	23.0744	14.2996
1250	20.7995	13.3247	36.3991	14.2996	22.0994	17.8746	30.2242	23.0744	14.6246
1260	21.1245	12.9997	35.7491	14.2996	22.0994	18.1995	30.2242	23.3994	14.9496
1270	21.4495	12.9997	36.3991	13.9747	22.0994	17.8746	29.5743	23.0744	14.6246
1280	20.7995	12.9997	36.0741	14.6246	22.4244	18.5245	30.5492	23.0744	14.6246
1290	20.7995	13.3247	36.3991	14.6246	22.0994	18.5245	29.5743	23.0744	13.6497
1300	21.1245	13.3247	35.7491	14.6246	22.0994	17.5496	29.5743	23.0744	13.9747
1310	20.7995	13.3247	35.7491	14.2996	22.0994	17.5496	30.2242	23.3994	13.9747
1320	21.1245	13.3247	36.3991	14.2996	22.0994	18.1995	29.8993	23.0744	13.6497
1330	20.4745	13.6497	36.3991	14.2996	22.0994	18.1995	30.2242	23.3994	13.9747
1340	21.4495	13.3247	36.0741	14.6246	22.4244	18.5245	30.5492	23.3994	13.6497
1350	21.7745	12.9997	36.0741	14.6246	22.0994	17.8746	29.5743	23.3994	13.6497
1360	21.1245	13.3247	36.3991	14.9496	22.0994	18.1995	29.5743	23.3994	13.3247
1370	21.7745	13.6497	36.7241	14.6246	22.0994	17.5496	28.9243	23.0744	12.9997
1380	21.1245	13.3247	36.7241	14.6246	22.0994	18.1995	29.8993	22.7494	13.3247
1390	20.4745	13.6497	36.7241	14.6246	22.0994	17.8746	30.2242	23.3994	13.6497
1400	21.1245	13.6497	36.3991	14.2996	22.0994	17.5496	29.8993	23.3994	12.9997
1410	21.1245	13.3247	36.3991	14.2996	22.0994	17.8746	30.2242	23.3994	13.3247
1420	20.7995	13.3247	36.7241	14.6246	22.4244	17.8746	29.8993	23.0744	12.9997
1430	21.1245	13.3247	36.7241	14.6246	21.7745	17.2246	29.8993	23.3994	12.6747
1440	20.7995	13.3247	36.7241	14.6246	22.0994	17.5496	30.2242	23.0744	12.6747
1450	20.7995	13.3247	36.0741	14.6246	22.4244	17.2246	29.5743	23.0744	12.6747
1460	21.1245	13.3247	36.3991	15.2746	21.7745	17.2246	30.2242	23.3994	13.6497
1470	21.1245	12.9997	36.0741	14.9496	22.0994	17.2246	29.8993	23.0744	13.3247
1480	21.1245	12.9997	36.0741	14.9496	22.0994	17.8746	29.8993	23.3994	12.9997
1490	20.7995	12.9997	36.0741	14.6246	22.4244	17.8746	29.5743	23.3994	12.3497
1500	20.7995	12.9997	36.3991	14.9496	22.4244	17.2246	29.5743	23.3994	13.9747
1510	21.1245	13.3247	36.3991	14.9496	22.0994	17.5496	29.5743	23.0744	13.9747
1520	22.0994	12.9997	36.3991	14.9496	22.7494	17.2246	29.8993	23.3994	14.2996
1530	21.1245	12.9997	35.7491	14.9496	21.7745	17.8746	29.2493	23.0744	14.6246
1540	21.1245	12.9997	36.0741	14.6246	22.4244	17.8746	29.8993	23.0744	13.6497
1550	21.1245	12.9997	36.3991	14.6246	22.0994	18.1995	29.5743	23.7244	14.2996
1560	21.7745	12.9997	36.0741	14.9496	22.4244	17.2246	29.5743	23.0744	13.9747
1570	20.4745	12.9997	36.0741	14.9496	21.7745	16.8996	29.8993	23.0744	14.2996
1580	20.7995	12.9997	36.3991	14.9496	22.4244	17.5496	29.8993	23.3994	13.6497
1590	21.1245	12.9997	36.3991	14.6246	22.0994	17.5496	29.2493	23.0744	13.9747
1600	21.1245	12.6747	36.3991	14.6246	22.0994	17.5496	29.5743	23.0744	14.6246
1610	20.7995	12.9997	35.7491	14.9496	22.4244	18.1995	29.8993	23.0744	13.6497
1620	21.4495	12.6747	35.7491	14.6246	22.4244	18.8495	30.5492	23.0744	13.3247
1630	20.7995	12.9997	36.0741	14.9496	22.0994	18.8495	30.2242	23.0744	13.3247
1640	21.4495	12.6747	36.0741	14.6246	21.7745	18.1995	29.2493	23.0744	13.9747
1650	21.1245	12.3497	35.7491	15.2746	22.0994	18.8495	30.2242	23.0744	13.6497
1660	21.1245	12.6747	36.0741	14.6246	22.0994	18.8495	30.2242	23.3994	12.9997
1670	21.1245	12.6747	36.0741	14.9496	21.7745	18.5245	29.8993	23.0744	13.3247
1680	21.1245	12.6747	36.0741	14.9496	22.0994	18.1995	29.8993	23.0744	12.6747
1690	21.4495	12.3497	36.7241	14.6246	21.7745	18.8495	29.5743	23.3994	12.9997
1700	21.1245	12.0247	36.0741	14.9496	22.0994	17.8746	29.8993	23.0744	12.9997
1710	20.7995	12.3497	36.3991	14.2996	22.0994	17.5496	29.5743	23.3994	14.2996
1720	21.4495	12.3497	36.0741	14.6246	21.7745	18.1995	29.8993	23.0744	14.2996
1730	21.1245	12.6747	37.0491	14.6246	21.7745	18.1995	30.5492	23.3994	14.9496
1740	21.4495	12.3497	36.3991	14.6246	21.7745	18.1995	30.5492	23.3994	14.9496
1750	21.1245	12.3497	36.7241	14.9496	22.0994	17.8746	30.2242	23.3994	14.9496
1760	21.1245	12.3497	36.7241	14.6246	22.0994	17.8746	31.1992	23.3994	14.2996
1770	21.1245	12.6747	37.0491	14.6246	21.7745	18.1995	30.2242	23.3994	14.9496
1780	21.4495	12.6747	37.0491	14.9496	21.7745	17.5496	29.5743	23.3994	13.9747
1790	21.7745	12.3497	36.3991	14.9496	22.0994	17.8746	29.5743	23.0744	13.6497
1800	21.4495	12.6747	36.3991	14.9496	22.0994	18.5245	29.5743	23.0744	13.9747
1810	21.7745	12.6747	36.3991	14.9496	21.7745	17.5496	29.8993	23.3994	14.6246
1820	21.4495	12.6747	36.0741	14.9496	22.0994	17.5496	29.8993	23.3994	14.9496
1830	21.4495	12.6747	36.3991	14.9496	22.0994	17.8746	29.2493	23.3994	14.2996
1840	21.1245	12.3497	36.7241	14.9496	21.7745	17.2246	29.8993	23.3994	14.6246
1850	21.7745	12.6747	36.0741	14.6246	21.7745	17.8746	29.5743	23.0744	13.3247
1860	21.7745	12.3497	36.0741	14.6246	22.0994	17.5496	29.2493	23.0744	14.2996
1870	21.4495	12.3497	36.3991	14.9496	22.0994	18.1995	29.8993	23.3994	12.6747
1880	21.7745	12.3497	36.0741	14.9496	22.0994	18.1995	29.5743	23.0744	12.6747
1890	21.4495	12.3497	36.3991	14.9496	22.0994	17.8746	29.8993	23.3994	13.3247
1900	21.1245	12.0247	36.3991	14.2996	22.0994	17.5496	29.8993	23.7244	13.9747
1910	21.7745	12.0247	36.3991	14.6246	21.7745	17.8746	29.5743	23.3994	13.6497
1920	21.1245	12.3497	36.0741	14.9496	22.0994	18.5245	30.2242	23.3994	14.2996
1930	21.4495	12.0247	36.3991	14.6246	21.7745	17.8746	30.2242	23.3994	13.3247
1940	21.1245	12.3497	36.0741	14.9496	21.7745	17.5496	29.5743	23.3994	13.9747
1950	21.4495	12.6747	36.7241	14.9496	21.7745	17.5496	29.8993	23.3994	14.2996
1960	21.1245	12.6747	36.3991	14.6246	21.7745	17.5496	29.5743	23.0744	13.6497
1970	21.4495	12.0247	36.3991	14.9496	22.0994	17.8746	29.5743	23.0744	13.6497
1980	20.7995	12.6747	36.3991	14.6246	21.7745	17.8746	29.2493	23.3994	13.3247
1990	21.1245	12.3497	36.3991	14.9496	21.7745	17.5496	30.2242	23.3994	13.9747
2000	21.4495	12.0247	36.0741	14.6246	21.7745	17.8746	29.2493	23.0744	13.3247
2010	21.4495	12.3497	36.3991	14.6246	22.4244	17.2246	29.8993	23.3994	13.6497
2020	21.4495	12.3497	36.3991	14.9496	21.7745	17.5496	29.5743	23.0744	13.3247
2030	21.7745	12.3497	36.3991	14.6246	22.0994	16.8996	28.9243	23.0744	12.9997
2040	21.4495	12.3497	36.0741	14.9496	21.7745	17.2246	29.8993	23.0744	14.2996
2050	21.4495	12.3497	36.0741	14.9496	21.7745	17.2246	29.5743	23.0744	14.6246
2060	21.1245	12.3497	35.7491	14.9496	21.7745	17.5496	30.2242	23.0744	13.6497
2070	21.4495	12.3497	36.3991	14.2996	21.7745	17.2246	29.2493	23.0744	13.3247
2080	21.4495	12.3497	36.3991	14.6246	22.0994	17.2246	29.8993	23.3994	13.6497
2090	20.7995	12.3497	36.3991	14.2996	21.4495	17.8746	29.5743	23.3994	14.2996

## Sheet: AL8810
Stimulation
Time	BGBV-306_0000	BGBV-345_0000	BGBV-347_0000	BGBV-352_0000	BGBV-353_0000	BGBV-354_0000	BGBV-428_0000	BGBV-429_0000	BGBV-430_0000
0	14.2996	22.7494	13.6497	36.7241	28.5993	25.0244	21.1245	16.2496	18.1995
10	14.2996	22.0994	13.3247	36.7241	27.9493	24.6994	21.1245	16.8996	18.1995
20	14.2996	22.4244	13.3247	36.7241	27.9493	25.0244	21.4495	16.8996	18.1995
30	14.6246	22.4244	13.3247	36.3991	28.5993	25.0244	21.4495	16.5746	17.8746
40	14.2996	22.4244	13.6497	36.3991	27.9493	24.6994	21.1245	16.8996	18.1995
50	14.2996	21.7745	13.3247	36.7241	28.2743	25.3494	21.1245	17.2246	17.8746
60	13.9747	22.0994	13.3247	36.7241	28.2743	24.6994	21.1245	16.8996	18.1995
70	14.2996	22.0994	13.6497	36.7241	28.5993	25.0244	21.1245	16.8996	17.8746
80	13.6497	22.4244	13.3247	36.7241	28.2743	25.3494	21.1245	17.2246	18.1995
90	13.9747	22.0994	13.3247	36.3991	28.2743	24.6994	21.1245	17.2246	18.1995
100	13.9747	22.0994	13.3247	36.3991	28.9243	25.3494	21.1245	16.8996	17.8746
110	13.9747	22.0994	13.3247	37.0491	28.5993	25.0244	21.1245	16.8996	17.8746
120	14.6246	22.4244	13.3247	36.3991	28.5993	25.0244	21.7745	16.5746	18.1995
130	14.2996	22.0994	13.6497	36.7241	27.9493	25.0244	21.4495	16.5746	17.8746
140	14.2996	22.0994	13.3247	36.7241	28.2743	25.3494	20.7995	16.5746	18.1995
150	14.9496	22.4244	12.9997	36.7241	28.2743	25.0244	20.7995	16.2496	18.1995
160	14.6246	22.4244	13.6497	37.3741	28.5993	25.3494	20.7995	16.2496	18.1995
170	13.9747	22.0994	13.3247	36.3991	28.5993	25.3494	20.7995	16.2496	18.1995
180	14.6246	22.4244	12.9997	36.7241	28.5993	25.3494	20.7995	16.2496	18.1995
190	14.2996	22.4244	12.9997	36.3991	28.2743	25.3494	21.1245	16.2496	18.5245
200	14.6246	22.4244	12.9997	36.3991	28.2743	25.3494	21.4495	16.2496	18.1995
210	14.2996	22.4244	12.9997	36.3991	28.5993	25.3494	20.7995	16.2496	18.5245
220	14.2996	22.7494	13.3247	36.3991	28.5993	25.0244	21.1245	16.2496	18.5245
230	13.9747	22.4244	12.9997	36.7241	28.2743	25.3494	20.4745	15.9246	18.5245
240	13.9747	22.0994	12.9997	36.3991	28.5993	25.0244	20.4745	16.5746	18.5245
250	14.2996	22.7494	12.9997	36.3991	28.2743	25.3494	20.7995	16.2496	18.5245
260	13.9747	22.4244	13.3247	37.0491	27.9493	25.0244	20.7995	15.9246	18.5245
270	14.6246	22.0994	12.9997	36.7241	28.2743	25.0244	20.7995	15.9246	18.5245
280	14.2996	22.4244	13.3247	36.7241	28.2743	25.3494	21.1245	15.9246	18.5245
290	14.2996	22.7494	13.3247	36.3991	28.2743	25.0244	20.7995	15.9246	18.5245
300	13.9747	22.0994	13.3247	36.3991	28.5993	25.3494	20.7995	15.2746	18.5245
310	14.2996	22.0994	13.3247	36.3991	28.2743	25.3494	21.1245	15.2746	18.5245
320	13.9747	22.0994	12.9997	36.3991	28.2743	25.6744	20.7995	15.2746	18.5245
330	13.9747	22.0994	12.9997	36.7241	27.9493	25.0244	20.7995	15.5996	18.5245
340	14.2996	22.7494	12.9997	36.7241	27.9493	25.3494	20.4745	15.9246	18.5245
350	14.2996	23.0744	12.9997	36.7241	28.2743	25.3494	21.1245	15.9246	18.1995
360	13.9747	22.7494	12.9997	36.3991	28.2743	25.0244	20.7995	15.9246	18.5245
370	13.9747	22.4244	12.9997	36.3991	28.2743	25.3494	20.1495	15.5996	18.5245
380	13.9747	22.4244	12.9997	36.3991	28.2743	25.3494	20.1495	15.5996	18.1995
390	13.9747	22.0994	12.9997	36.7241	28.2743	25.3494	20.7995	15.9246	18.5245
400	13.9747	22.7494	12.9997	36.3991	27.9493	25.3494	20.1495	16.5746	18.8495
410	14.2996	22.4244	12.9997	36.0741	28.5993	25.0244	20.4745	16.2496	18.5245
420	14.6246	22.4244	12.9997	36.3991	28.2743	25.6744	20.4745	16.8996	18.8495
430	14.2996	22.4244	13.3247	36.3991	28.2743	25.3494	20.4745	16.2496	18.8495
440	14.6246	22.4244	13.3247	36.3991	28.5993	25.3494	20.1495	16.8996	18.8495
450	14.6246	22.4244	12.9997	36.3991	27.9493	25.3494	20.4745	16.5746	18.5245
460	14.2996	22.4244	12.9997	36.3991	28.5993	25.3494	20.4745	16.5746	18.5245
470	13.9747	22.0994	12.9997	36.3991	28.5993	25.6744	20.7995	16.5746	18.5245
480	13.9747	22.7494	13.6497	36.3991	28.5993	25.3494	21.1245	16.2496	18.5245
490	14.2996	22.4244	13.3247	36.3991	28.2743	25.3494	20.4745	16.2496	18.8495
500	13.6497	22.0994	12.9997	36.3991	28.5993	25.3494	20.4745	16.2496	18.8495
510	13.9747	22.0994	13.3247	36.3991	27.9493	25.3494	19.8245	16.2496	18.8495
520	13.9747	22.4244	12.9997	36.0741	28.2743	25.3494	20.1495	15.9246	18.5245
530	13.9747	22.4244	12.9997	36.3991	28.2743	25.3494	20.1495	15.5996	19.1745
540	14.2996	22.0994	12.9997	36.3991	28.2743	25.3494	20.1495	15.5996	18.5245
550	13.9747	22.4244	13.3247	36.0741	28.2743	25.6744	20.4745	15.9246	18.8495
560	14.2996	22.7494	13.3247	36.3991	28.5993	25.3494	20.1495	15.9246	18.5245
570	14.2996	23.0744	13.3247	36.7241	28.2743	25.3494	20.7995	15.5996	18.5245
580	13.9747	22.4244	13.3247	36.3991	28.2743	25.0244	20.1495	15.9246	18.8495
590	13.9747	22.4244	12.9997	36.3991	28.2743	25.6744	20.1495	15.5996	18.8495
600	13.6497	21.7745	12.9997	36.3991	27.9493	25.3494	20.4745	15.9246	18.5245
610	13.9747	22.4244	12.9997	36.0741	28.2743	25.0244	20.1495	16.2496	18.8495
620	14.2996	22.7494	13.3247	36.0741	28.2743	25.3494	19.8245	15.9246	18.8495
630	13.9747	22.4244	12.9997	36.0741	27.9493	25.3494	20.4745	15.9246	18.5245
640	13.9747	22.0994	13.3247	36.3991	28.2743	25.0244	20.7995	15.9246	18.8495
650	13.9747	22.7494	13.3247	36.3991	27.9493	25.3494	20.4745	15.5996	18.5245
660	13.6497	22.0994	13.3247	36.3991	28.2743	25.3494	20.1495	15.5996	18.5245
670	13.6497	22.0994	12.9997	36.3991	28.5993	25.3494	20.4745	15.9246	18.8495
680	13.9747	22.7494	13.3247	36.3991	28.2743	25.3494	20.4745	15.9246	19.1745
690	13.6497	22.4244	13.3247	36.3991	28.5993	25.0244	20.4745	15.9246	18.8495
700	13.3247	22.0994	12.9997	37.0491	28.5993	25.3494	20.1495	15.9246	18.8495
710	13.3247	22.4244	12.9997	36.3991	28.5993	25.3494	20.7995	15.2746	19.1745
720	12.9997	22.0994	12.9997	37.0491	28.5993	25.3494	19.8245	16.5746	18.5245
730	13.6497	22.4244	13.3247	36.3991	28.2743	25.3494	20.4745	15.9246	18.8495
740	13.3247	22.7494	12.3497	36.3991	28.2743	25.3494	20.4745	16.5746	18.8495
750	13.6497	22.7494	12.9997	36.7241	28.5993	25.3494	20.1495	16.2496	18.5245
760	13.6497	22.4244	12.9997	35.7491	28.2743	25.0244	20.7995	16.2496	18.5245
770	13.9747	22.4244	12.9997	36.7241	28.5993	25.0244	20.1495	15.2746	18.5245
780	13.6497	23.0744	12.9997	36.3991	28.5993	25.0244	19.8245	15.5996	18.8495
790	14.2996	23.0744	13.3247	35.4241	28.2743	25.3494	20.4745	15.2746	18.5245
800	13.9747	23.0744	12.9997	35.7491	28.2743	25.3494	20.4745	15.2746	18.5245
810	13.9747	22.7494	12.9997	36.0741	28.5993	24.6994	20.4745	15.2746	18.8495
820	13.6497	22.7494	12.9997	36.3991	28.2743	25.0244	20.7995	14.9496	18.8495
830	13.6497	22.7494	12.9997	36.3991	27.9493	25.0244	20.4745	15.2746	18.8495
840	13.6497	22.0994	12.6747	36.3991	28.2743	25.0244	20.4745	15.2746	18.5245
850	13.9747	22.4244	12.6747	37.3741	28.2743	25.0244	20.4745	15.5996	18.8495
860	13.6497	23.0744	12.6747	36.3991	28.2743	25.3494	20.7995	15.2746	18.5245
870	13.6497	22.4244	12.6747	37.0491	27.9493	25.0244	20.4745	15.5996	18.8495
880	13.6497	22.0994	12.6747	36.7241	28.2743	25.0244	20.7995	15.2746	18.8495
890	13.6497	22.7494	12.9997	36.3991	28.2743	25.0244	20.4745	14.9496	18.5245
900	13.3247	22.4244	12.9997	36.3991	28.5993	24.6994	20.1495	14.9496	18.5245
910	13.3247	22.4244	12.9997	36.7241	28.5993	24.6994	20.4745	14.6246	18.1995
920	13.6497	22.4244	12.6747	36.7241	28.2743	25.0244	20.1495	14.6246	18.5245
930	13.6497	22.0994	12.9997	36.0741	27.9493	25.0244	20.7995	14.9496	18.5245
940	13.9747	22.0994	12.6747	36.3991	28.2743	25.0244	20.7995	15.2746	18.5245
950	13.6497	22.4244	12.9997	36.3991	28.2743	25.3494	20.7995	15.2746	18.5245
960	13.6497	22.4244	12.9997	36.3991	27.9493	25.0244	20.7995	15.5996	18.5245
970	13.3247	22.0994	12.6747	36.3991	27.9493	24.3744	20.4745	15.5996	18.5245
980	13.3247	22.4244	12.9997	36.7241	27.9493	24.6994	20.1495	15.2746	18.8495
990	13.3247	22.4244	12.9997	37.3741	27.9493	24.6994	19.4995	15.9246	18.5245
1000	13.6497	22.4244	12.9997	37.3741	28.2743	24.6994	20.1495	15.5996	18.5245
1010	13.9747	22.0994	12.6747	37.3741	28.2743	24.6994	20.1495	15.2746	18.8495
1020	13.9747	22.0994	13.3247	37.6991	28.2743	25.0244	20.7995	15.5996	18.8495
1030	14.2996	21.7745	12.6747	36.7241	27.9493	24.6994	20.1495	15.5996	18.8495
1040	13.6497	22.4244	12.9997	37.3741	27.9493	24.6994	19.8245	15.5996	19.1745
1050	13.6497	21.7745	12.9997	36.7241	28.2743	24.3744	19.8245	15.5996	18.8495
1060	13.6497	22.4244	12.9997	37.0491	28.2743	24.6994	19.8245	15.5996	18.5245
1070	14.2996	22.7494	12.9997	37.0491	28.2743	25.0244	19.4995	15.5996	18.5245
1080	13.9747	22.4244	12.9997	36.7241	28.2743	25.0244	20.1495	15.2746	18.8495
1090	13.6497	22.4244	13.3247	36.7241	28.2743	24.6994	20.1495	15.5996	18.5245
1100	13.6497	22.4244	12.9997	37.0491	27.9493	24.6994	19.1745	15.5996	18.5245
1110	13.3247	22.4244	12.9997	36.7241	28.2743	24.3744	19.4995	15.2746	18.5245
1120	13.3247	22.0994	12.9997	36.7241	27.9493	24.6994	19.8245	15.2746	18.5245
1130	13.6497	22.0994	12.6747	37.0491	27.9493	24.3744	19.4995	14.9496	18.5245
1140	13.6497	22.0994	13.3247	37.0491	28.2743	24.6994	19.4995	15.2746	18.8495
1150	13.6497	22.4244	12.9997	37.3741	27.9493	24.6994	19.8245	15.2746	18.5245
1160	13.6497	22.4244	12.9997	36.7241	28.2743	24.6994	19.1745	15.2746	18.5245
1170	14.2996	22.0994	12.6747	36.7241	28.2743	25.0244	19.4995	15.5996	18.8495
1180	13.9747	22.0994	12.9997	37.0491	27.9493	25.0244	19.1745	15.2746	18.8495
1190	13.9747	22.4244	13.3247	36.0741	28.2743	25.0244	19.1745	14.9496	18.8495
1200	14.2996	22.4244	13.3247	36.3991	28.2743	24.6994	19.4995	14.9496	18.8495
1210	14.2996	22.0994	13.3247	36.7241	28.2743	25.0244	19.8245	15.5996	18.5245
1220	14.2996	22.4244	13.3247	36.0741	27.9493	24.6994	19.4995	15.5996	18.8495
1230	14.2996	22.7494	13.3247	36.7241	28.2743	24.6994	19.4995	15.5996	18.5245
1240	14.6246	22.0994	13.3247	37.3741	27.9493	24.6994	19.4995	15.2746	18.5245
1250	14.6246	22.0994	13.3247	37.0491	28.2743	24.6994	19.4995	15.5996	18.8495
1260	14.6246	22.4244	13.3247	36.7241	28.2743	24.6994	18.8495	15.5996	18.8495
1270	14.2996	22.0994	13.3247	37.0491	28.2743	24.6994	18.8495	15.5996	18.5245
1280	14.2996	22.4244	12.9997	36.3991	28.5993	24.6994	18.8495	15.9246	18.5245
1290	14.2996	22.0994	13.3247	37.0491	28.5993	25.0244	19.1745	15.5996	18.8495
1300	14.2996	23.0744	13.3247	37.0491	28.2743	25.0244	19.1745	15.2746	18.5245
1310	14.6246	22.7494	13.3247	37.3741	27.9493	24.3744	19.4995	14.9496	18.5245
1320	14.6246	22.4244	12.6747	37.0491	27.9493	24.6994	19.4995	15.2746	18.5245
1330	14.6246	22.7494	12.9997	37.0491	27.9493	24.3744	19.4995	14.6246	18.8495
1340	14.6246	22.0994	12.6747	37.0491	27.9493	24.6994	18.8495	14.6246	18.5245
1350	13.9747	22.0994	12.9997	37.0491	27.9493	24.6994	18.5245	15.5996	18.8495
1360	13.3247	22.7494	12.6747	36.7241	27.9493	24.6994	18.8495	14.9496	18.8495
1370	13.6497	22.7494	12.6747	36.7241	27.9493	25.0244	18.8495	15.9246	18.8495
1380	13.3247	23.0744	12.9997	37.0491	27.9493	24.6994	18.5245	15.5996	19.1745
1390	12.9997	22.4244	12.3497	36.7241	27.9493	24.6994	18.5245	15.5996	18.8495
1400	13.3247	23.0744	12.3497	36.7241	27.9493	24.6994	18.5245	15.2746	18.8495
1410	13.3247	23.0744	12.3497	36.7241	27.9493	24.6994	18.5245	15.2746	18.8495
1420	13.3247	23.3994	12.6747	36.7241	27.9493	24.6994	18.1995	15.2746	19.1745
1430	12.9997	22.4244	12.6747	36.7241	28.2743	24.6994	18.5245	14.9496	18.8495
1440	13.3247	22.4244	12.6747	36.3991	28.5993	24.6994	18.5245	14.6246	18.8495
1450	12.9997	22.0994	12.6747	36.3991	28.2743	24.6994	18.5245	14.9496	19.1745
1460	13.3247	22.4244	12.6747	36.7241	28.5993	25.0244	18.8495	14.9496	19.1745
1470	13.3247	22.0994	12.3497	36.3991	28.2743	24.3744	18.5245	14.9496	18.8495
1480	13.3247	22.4244	12.3497	36.7241	28.5993	25.0244	18.5245	14.2996	18.5245
1490	13.3247	22.0994	12.0247	36.3991	28.5993	24.3744	18.8495	14.6246	18.8495
1500	12.9997	22.4244	12.0247	36.7241	28.2743	24.3744	18.8495	14.9496	18.5245
1510	13.3247	22.0994	12.3497	36.3991	27.9493	24.6994	18.8495	15.2746	18.8495
1520	13.3247	23.0744	12.3497	36.7241	28.2743	24.6994	18.5245	15.5996	18.8495
1530	13.6497	22.4244	12.3497	36.7241	28.2743	24.6994	19.1745	14.6246	18.5245
1540	13.6497	21.7745	12.3497	36.7241	28.5993	24.6994	18.5245	14.9496	18.8495
1550	13.3247	22.4244	12.3497	37.0491	27.9493	24.6994	18.5245	14.9496	19.1745
1560	13.6497	22.4244	12.6747	36.7241	28.2743	24.6994	18.8495	14.9496	18.8495
1570	13.3247	22.4244	12.6747	36.7241	28.5993	24.3744	19.1745	14.9496	18.8495
1580	13.3247	22.7494	12.6747	37.0491	28.2743	24.3744	18.5245	15.5996	18.8495
1590	13.6497	22.0994	12.6747	37.0491	28.2743	24.6994	18.5245	15.2746	18.8495
1600	13.6497	22.7494	12.3497	36.7241	28.9243	24.6994	18.5245	15.2746	18.8495
1610	13.3247	22.0994	12.6747	37.3741	28.2743	24.3744	18.8495	14.9496	18.8495
1620	13.3247	23.0744	12.6747	37.0491	27.9493	25.0244	19.1745	14.6246	18.8495
1630	12.9997	23.0744	12.6747	36.7241	28.2743	24.3744	19.1745	14.6246	18.8495
1640	13.3247	22.4244	12.6747	36.7241	28.2743	25.0244	19.1745	14.2996	18.8495
1650	13.3247	22.4244	12.6747	36.7241	28.2743	24.6994	18.5245	14.2996	18.8495
1660	13.6497	22.4244	12.9997	37.3741	28.5993	25.0244	19.1745	14.6246	18.8495
1670	12.9997	22.0994	12.6747	36.7241	27.9493	24.3744	19.1745	14.9496	18.8495
1680	13.3247	22.7494	12.3497	36.7241	28.2743	24.3744	19.1745	14.9496	18.8495
1690	12.9997	22.4244	12.3497	37.0491	27.9493	25.0244	18.8495	14.9496	18.8495
1700	12.9997	22.0994	12.6747	36.7241	28.2743	24.3744	18.8495	14.9496	18.8495
1710	12.9997	23.0744	12.6747	36.7241	27.9493	24.3744	19.1745	14.9496	18.8495
1720	13.6497	22.4244	12.3497	36.0741	27.9493	24.6994	19.1745	14.6246	18.8495
1730	13.3247	23.0744	12.6747	36.7241	27.9493	24.3744	18.8495	14.6246	18.8495
1740	12.9997	22.4244	12.0247	36.7241	27.9493	25.0244	18.8495	14.6246	18.8495
1750	13.3247	22.7494	12.0247	36.7241	27.9493	24.3744	18.5245	14.6246	19.1745
1760	13.3247	22.4244	12.0247	36.3991	27.6243	24.3744	19.1745	14.2996	18.8495
1770	13.3247	23.3994	11.6997	36.3991	27.9493	24.6994	18.8495	14.6246	18.8495
1780	13.3247	23.0744	11.6997	36.0741	28.2743	24.6994	18.5245	14.6246	18.8495
1790	13.3247	22.0994	11.6997	36.7241	27.9493	24.6994	18.5245	14.6246	18.8495
1800	13.3247	22.0994	11.3747	36.7241	27.9493	24.6994	18.8495	14.6246	18.8495
1810	13.3247	22.4244	11.6997	36.0741	27.6243	25.0244	18.8495	14.6246	18.8495
1820	13.3247	22.0994	11.3747	36.3991	27.9493	24.6994	18.8495	14.2996	18.8495
1830	13.3247	22.7494	11.3747	36.0741	27.9493	25.0244	18.8495	14.6246	18.8495
1840	13.3247	22.7494	12.0247	36.7241	27.9493	24.6994	19.4995	14.6246	19.1745
1850	13.3247	22.0994	12.3497	36.3991	27.6243	25.0244	19.1745	14.6246	19.1745
1860	13.3247	22.4244	12.0247	36.3991	27.2993	24.6994	18.1995	14.2996	18.8495
1870	13.3247	22.4244	12.0247	36.3991	27.2993	24.6994	18.1995	14.6246	19.4995
1880	12.9997	22.0994	11.6997	36.3991	26.9743	24.6994	18.5245	14.2996	19.1745
1890	13.3247	22.7494	12.0247	36.3991	27.6243	25.0244	18.5245	14.6246	18.8495
1900	12.6747	22.7494	11.6997	36.0741	27.2993	24.6994	18.1995	14.6246	19.1745
1910	12.9997	23.0744	11.6997	36.0741	27.2993	25.0244	18.5245	14.2996	19.1745
1920	13.9747	22.4244	11.6997	35.7491	27.2993	24.3744	18.8495	14.6246	19.1745
1930	13.3247	22.4244	12.0247	36.0741	27.6243	25.3494	18.1995	14.6246	19.1745
1940	13.3247	22.7494	12.0247	36.0741	27.2993	25.0244	18.8495	14.6246	19.1745
1950	13.3247	22.4244	12.0247	36.3991	27.9493	24.6994	18.5245	14.2996	19.1745
1960	13.3247	23.0744	12.0247	36.3991	26.9743	25.0244	18.8495	14.2996	19.1745
1970	13.6497	22.7494	12.3497	36.3991	27.2993	25.3494	19.4995	14.2996	19.1745
1980	13.3247	22.7494	12.0247	35.7491	26.9743	24.6994	19.1745	14.6246	19.1745
1990	13.6497	23.0744	11.3747	36.0741	26.9743	25.0244	19.1745	14.6246	19.1745
2000	13.9747	22.4244	11.3747	36.0741	26.9743	24.6994	18.5245	14.2996	19.1745
2010	13.3247	22.0994	11.3747	36.0741	27.2993	25.3494	19.1745	14.2996	19.1745
2020	13.9747	22.7494	11.3747	35.7491	26.9743	24.3744	18.8495	14.6246	19.1745
2030	13.3247	23.3994	11.0497	36.0741	26.9743	25.0244	18.8495	14.2996	19.1745
2040	12.9997	22.7494	11.0497	36.3991	26.9743	24.3744	18.5245	14.2996	19.1745
2050	12.9997	22.7494	11.0497	36.0741	26.9743	24.3744	18.1995	14.2996	19.1745
2060	12.9997	22.7494	11.3747	36.3991	27.2993	24.6994	18.1995	14.2996	19.1745
2070	12.6747	22.4244	11.6997	36.0741	26.9743	24.3744	18.1995	14.9496	19.1745
2080	12.6747	23.0744	11.3747	36.0741	27.6243	24.6994	18.5245	14.9496	19.1745
2090	12.9997	22.7494	11.0497	36.0741	27.6243	24.6994	18.5245	14.9496	19.1745
