# Supplementary material for: Elevated pyramidal cell firing orchestrates arteriolar vasoconstriction through COX-2-derived prostaglandin E2 signaling
Source: eLife. 2025 Apr 23;13:RP102424. doi: 10.7554/eLife.102424 (PMC12017770; doi:10.7554/eLife.102424)
Supplement: Figure 5—figure supplement 2—source data 1. [file elife-102424-fig5-figsupp2-data1.xls]

## Sheet: 10nM
Stimulation
Time	BGBV330_0000	BGBV335_0000	BGBV336_0000	BGBV337_0000	BGBV338_0000	BGBV340_0000	BGBV341_0000
-300	17.5496	12.6747	18.5245	19.8245	18.8495	15.5996	24.0494
-290	17.5496	12.6747	18.5245	19.4995	19.1745	15.5996	24.0494
-280	17.2246	12.6747	18.1995	19.4995	19.1745	15.5996	24.3744
-270	17.5496	12.9997	18.5245	19.8245	19.1745	15.9246	24.0494
-260	17.2246	12.6747	18.5245	19.4995	19.1745	15.5996	24.3744
-250	17.2246	12.6747	18.5245	19.4995	18.8495	15.5996	24.3744
-240	17.2246	12.6747	18.5245	19.8245	19.1745	15.5996	24.3744
-230	17.2246	12.6747	18.5245	19.8245	18.8495	15.5996	24.3744
-220	17.2246	12.6747	18.1995	19.8245	18.5245	15.2746	24.3744
-210	17.2246	12.9997	18.5245	19.8245	18.8495	15.5996	24.3744
-200	17.2246	12.6747	18.5245	19.8245	18.5245	15.9246	24.3744
-190	17.2246	12.6747	18.5245	19.8245	19.1745	15.5996	24.3744
-180	17.5496	12.6747	18.5245	19.8245	19.1745	15.9246	24.3744
-170	17.5496	12.6747	18.5245	19.8245	18.8495	15.5996	24.3744
-160	17.5496	12.6747	18.5245	19.8245	18.8495	15.5996	24.3744
-150	17.8746	12.6747	18.5245	19.8245	19.1745	15.2746	24.0494
-140	17.5496	12.9997	18.5245	19.8245	19.1745	15.2746	24.3744
-130	17.5496	12.3497	18.1995	19.8245	18.8495	15.2746	24.0494
-120	17.5496	12.9997	18.5245	20.1495	18.8495	15.5996	24.0494
-110	17.5496	12.6747	18.5245	19.8245	19.1745	15.5996	24.3744
-100	17.8746	12.9997	18.5245	19.8245	18.8495	15.5996	24.3744
-90	17.8746	12.6747	18.5245	19.8245	18.8495	15.2746	24.3744
-80	17.5496	12.9997	18.5245	19.8245	18.8495	15.2746	24.6994
-70	17.8746	12.3497	18.1995	19.8245	18.5245	15.5996	24.3744
-60	17.5496	12.9997	18.1995	19.8245	18.5245	15.2746	24.3744
-50	17.5496	12.9997	18.5245	19.8245	19.1745	15.2746	24.3744
-40	17.5496	12.9997	18.1995	19.8245	18.8495	15.2746	24.3744
-30	17.5496	12.6747	18.5245	19.8245	19.1745	15.2746	24.6994
-20	17.2246	12.6747	18.5245	20.1495	19.1745	15.5996	24.3744
-10	17.2246	12.6747	18.1995	20.1495	18.5245	15.2746	24.3744
0	17.5496	12.9997	18.1995	19.8245	19.1745	14.9496	24.6994
10	17.5496	12.6747	18.5245	19.8245	18.8495	15.2746	24.3744
20	17.5496	12.9997	18.5245	19.8245	18.8495	15.2746	24.3744
30	17.5496	12.6747	18.5245	19.8245	19.1745	15.5996	24.3744
40	17.5496	12.9997	18.5245	19.8245	18.8495	15.5996	24.3744
50	17.2246	12.9997	18.5245	19.8245	19.1745	15.5996	24.0494
60	17.5496	12.6747	18.5245	19.8245	19.1745	14.9496	24.6994
70	17.2246	12.6747	18.5245	19.8245	19.1745	15.9246	24.3744
80	17.8746	12.9997	18.5245	19.8245	18.8495	15.5996	25.0244
90	17.5496	12.9997	18.1995	19.8245	18.8495	14.9496	24.3744
100	17.2246	12.6747	18.5245	19.8245	19.1745	15.5996	24.3744
110	17.5496	12.9997	18.1995	19.8245	18.8495	15.5996	24.3744
120	17.5496	12.6747	18.1995	19.8245	19.1745	15.2746	24.3744
130	17.8746	12.6747	18.1995	19.8245	19.1745	15.5996	24.3744
140	17.5496	12.6747	18.5245	19.8245	18.8495	15.2746	24.0494
150	17.5496	12.9997	18.5245	20.1495	19.1745	15.9246	24.6994
160	17.8746	12.6747	18.5245	20.1495	18.8495	15.5996	24.6994
170	17.5496	12.9997	18.5245	19.8245	18.8495	15.9246	24.3744
180	17.5496	12.9997	18.5245	19.8245	19.1745	15.9246	24.6994
190	17.8746	12.9997	18.1995	19.8245	19.1745	15.2746	24.6994
200	17.5496	12.6747	18.5245	19.8245	18.8495	15.5996	24.3744
210	17.5496	12.9997	18.1995	19.8245	18.8495	15.5996	25.0244
220	17.5496	12.9997	18.1995	19.8245	18.5245	15.2746	24.6994
230	17.8746	12.6747	18.5245	19.8245	18.8495	15.2746	24.6994
240	17.8746	12.9997	18.1995	19.8245	18.8495	14.9496	25.0244
250	17.8746	12.9997	18.1995	20.1495	18.8495	15.2746	24.0494
260	17.5496	12.9997	18.1995	19.8245	18.8495	14.9496	24.6994
270	17.8746	12.9997	18.1995	20.1495	19.1745	15.5996	24.6994
280	17.5496	12.9997	18.5245	19.8245	18.8495	15.2746	24.6994
290	17.8746	12.6747	18.5245	19.8245	19.1745	15.2746	25.0244
300	17.8746	12.9997	18.1995	19.8245	18.8495	14.9496	24.6994
310	17.5496	12.6747	18.1995	19.8245	18.8495	15.2746	24.6994
320	17.8746	12.6747	18.1995	19.8245	18.8495	15.5996	24.6994
330	17.5496	12.9997	18.1995	19.8245	18.8495	15.2746	25.0244
340	17.8746	12.6747	18.1995	19.8245	18.8495	15.5996	25.0244
350	17.5496	12.6747	18.1995	19.8245	18.5245	15.9246	24.6994
360	17.8746	12.9997	18.1995	19.8245	18.8495	15.2746	25.0244
370	17.5496	12.6747	18.1995	19.8245	18.5245	15.5996	24.6994
380	17.5496	12.6747	17.8746	19.8245	18.8495	15.5996	24.3744
390	17.8746	12.9997	18.1995	19.8245	18.8495	15.9246	24.6994
400	18.1995	12.6747	18.1995	19.8245	18.8495	15.5996	24.6994
410	17.8746	12.9997	17.8746	19.8245	18.8495	15.2746	25.0244
420	17.8746	12.9997	18.1995	19.8245	18.8495	15.5996	24.3744
430	17.8746	12.6747	18.1995	19.8245	18.8495	15.2746	25.0244
440	17.8746	12.6747	18.1995	19.8245	18.8495	15.9246	24.6994
450	17.8746	12.9997	17.8746	19.8245	18.8495	15.9246	24.3744
460	17.8746	12.9997	17.8746	19.8245	18.8495	15.5996	24.6994
470	17.8746	12.6747	17.8746	19.8245	18.8495	14.9496	24.3744
480	17.8746	12.6747	17.8746	19.8245	19.1745	14.9496	25.0244
490	17.5496	12.6747	17.8746	19.8245	18.8495	15.2746	24.0494
500	17.8746	12.9997	17.8746	19.8245	18.8495	15.2746	24.6994
510	17.8746	12.9997	17.8746	19.8245	18.8495	14.9496	25.0244
520	18.1995	12.6747	17.8746	19.8245	18.8495	15.2746	25.0244
530	17.8746	12.9997	17.8746	19.8245	18.5245	15.5996	24.6994
540	17.5496	12.6747	17.8746	20.1495	18.8495	14.9496	24.3744
550	17.5496	12.6747	17.8746	19.8245	18.5245	15.2746	24.6994
560	17.8746	12.6747	17.8746	19.8245	18.5245	15.5996	24.3744
570	17.8746	12.6747	17.8746	19.8245	18.5245	15.5996	25.0244
580	17.8746	12.9997	17.8746	19.8245	18.8495	14.9496	25.0244
590	18.1995	12.6747	17.8746	19.8245	18.8495	14.9496	24.6994
600	17.8746	12.6747	17.8746	19.8245	18.8495	14.9496	24.3744
610	17.8746	12.6747	17.8746	19.8245	18.5245	15.2746	24.6994
620	17.8746	12.6747	17.8746	20.1495	18.5245	15.2746	24.3744
630	18.5245	12.6747	17.8746	20.1495	18.5245	14.9496	24.0494
640	17.8746	12.6747	17.8746	19.8245	18.5245	14.9496	24.6994
650	17.8746	12.6747	17.8746	19.8245	18.5245	15.2746	25.0244
660	17.8746	12.6747	18.1995	20.1495	18.5245	15.5996	24.6994
670	17.8746	12.6747	18.1995	20.1495	18.5245	15.2746	24.6994
680	17.8746	12.3497	18.1995	19.8245	18.5245	15.2746	24.3744
690	17.8746	12.9997	17.8746	19.8245	18.5245	15.2746	24.6994
700	17.8746	12.6747	17.8746	19.8245	18.8495	15.5996	24.6994
710	17.8746	12.6747	17.8746	19.8245	18.5245	15.2746	24.3744
720	17.8746	12.9997	17.8746	19.8245	18.8495	15.2746	24.6994
730	18.1995	12.9997	17.8746	19.8245	18.5245	14.9496	24.6994
740	18.1995	12.6747	17.8746	19.8245	18.8495	15.5996	24.3744
750	17.8746	12.6747	17.8746	19.8245	18.5245	14.9496	24.3744
760	17.8746	12.6747	17.8746	19.8245	18.5245	15.2746	24.3744
770	17.8746	12.6747	17.8746	19.8245	18.5245	15.2746	24.6994
780	18.1995	12.6747	17.8746	19.8245	18.5245	15.2746	24.3744
790	17.8746	12.6747	17.8746	19.8245	18.5245	15.5996	24.3744
800	17.8746	12.9997	17.8746	19.8245	18.1995	14.9496	24.3744
810	18.1995	12.3497	17.8746	19.8245	18.5245	15.2746	25.0244
820	18.1995	12.6747	17.8746	19.8245	18.5245	15.2746	24.3744
830	17.8746	12.6747	17.8746	19.8245	18.8495	15.2746	24.0494
840	18.1995	12.6747	17.8746	19.8245	18.5245	15.2746	25.0244
850	17.8746	12.9997	17.8746	19.8245	18.1995	14.9496	24.3744
860	17.8746	12.6747	17.8746	19.8245	18.5245	14.9496	24.3744
870	17.8746	12.6747	17.8746	19.8245	18.5245	15.2746	25.0244
880	17.8746	12.6747	17.8746	19.8245	18.5245	15.2746	25.0244
890	17.8746	12.6747	17.8746	19.8245	18.5245	14.9496	24.6994
900	18.1995	12.9997	17.8746	19.8245	18.8495	15.2746	24.3744
910	17.5496	12.9997	17.8746	19.8245	18.1995	15.2746	25.0244
920	18.1995	12.9997	17.8746	19.8245	18.5245	14.6246	25.0244
930	18.5245	12.6747	17.8746	19.8245	18.1995	14.9496	24.6994
940	18.1995	12.6747	17.8746	19.8245	18.5245	14.9496	24.3744
950	18.5245	12.9997	17.8746	19.8245	18.1995	14.6246	24.3744
960	17.8746	12.6747	18.1995	20.1495	18.5245	15.2746	24.0494
970	17.8746	12.9997	17.8746	19.8245	18.1995	14.9496	24.3744
980	18.5245	12.9997	17.8746	20.1495	18.1995	15.2746	24.3744
990	18.1995	12.9997	18.1995	20.1495	18.8495	14.9496	24.3744
1000	18.1995	12.6747	17.8746	20.1495	18.5245	14.9496	24.3744
1010	18.1995	12.9997	17.8746	20.1495	18.5245	14.2996	24.3744
1020	17.8746	12.9997	17.8746	20.1495	18.1995	14.2996	24.3744
1030	18.5245	12.9997	17.8746	20.1495	18.1995	14.6246	24.3744
1040	18.5245	12.9997	18.1995	20.1495	18.8495	14.9496	24.3744
1050	18.1995	12.9997	17.8746	19.8245	18.1995	14.6246	24.3744
1060	18.5245	12.9997	18.1995	20.1495	18.8495	14.6246	24.3744
1070	18.1995	12.9997	18.1995	20.1495	18.1995	14.6246	24.3744
1080	18.1995	12.9997	17.8746	20.1495	18.1995	14.6246	24.3744
1090	18.1995	12.6747	18.1995	20.1495	18.5245	14.6246	24.3744
1100	18.5245	12.9997	18.5245	20.1495	18.1995	14.6246	24.3744
1110	18.1995	12.6747	18.1995	20.1495	18.1995	14.2996	24.3744
1120	18.1995	12.6747	18.1995	20.1495	18.1995	14.9496	24.3744
1130	18.1995	12.9997	18.1995	20.1495	18.5245	14.2996	24.3744
1140	17.5496	12.6747	18.1995	20.1495	18.5245	14.9496	24.3744
1150	17.5496	12.6747	18.1995	20.1495	18.5245	14.2996	24.3744
1160	17.5496	12.6747	18.5245	20.1495	18.5245	14.6246	24.3744
1170	17.2246	12.3497	18.5245	20.1495	18.5245	14.6246	24.0494
1180	17.8746	12.6747	18.1995	20.1495	18.5245	14.9496	24.3744
1190	17.5496	12.6747	18.5245	20.1495	18.5245	14.6246	24.6994
1200	17.8746	12.6747	18.5245	20.1495	18.5245	14.9496	24.3744
1210	18.1995	12.6747	18.1995	20.1495	18.1995	14.2996	24.3744
1220	17.8746	12.6747	18.5245	20.1495	18.1995	14.6246	24.3744
1230	17.8746	12.6747	18.1995	20.1495	18.1995	14.9496	24.3744
1240	17.8746	12.9997	18.1995	20.1495	18.1995	14.2996	24.3744
1250	17.5496	12.6747	18.1995	20.1495	18.5245	14.6246	24.3744
1260	17.8746	12.6747	18.5245	20.1495	18.1995	14.2996	24.3744
1270	17.5496	12.6747	18.1995	20.1495	18.5245	14.2996	24.3744
1280	17.2246	12.9997	18.1995	20.1495	18.5245	14.2996	24.3744
1290	17.5496	12.9997	18.1995	19.8245	18.5245	14.6246	24.3744
1300	17.8746	12.9997	18.1995	19.8245	18.1995	14.2996	24.3744
1310	17.5496	12.6747	18.5245	19.8245	18.5245	14.2996	24.0494
1320	17.5496	12.9997	18.5245	19.8245	18.1995	14.2996	24.3744
1330	17.5496	12.6747	18.1995	20.1495	17.8746	14.2996	24.3744
1340	17.5496	12.9997	18.1995	19.8245	18.1995	14.6246	24.3744
1350	17.5496	12.9997	18.1995	19.8245	18.5245	14.2996	24.3744
1360	17.2246	12.9997	18.1995	20.4745	18.1995	14.2996	24.3744
1370	17.8746	12.9997	18.1995	20.4745	17.8746	14.2996	24.3744
1380	17.5496	12.9997	18.1995	20.1495	17.8746	14.9496	24.3744
1390	17.8746	12.9997	18.5245	19.8245	18.5245	14.6246	24.3744
1400	17.8746	12.9997	17.8746	20.1495	18.1995	14.9496	24.3744
1410	17.8746	12.6747	18.5245	20.1495	18.8495	14.6246	24.3744
1420	17.5496	12.6747	18.5245	19.8245	18.1995	14.9496	24.6994
1430	17.8746	12.6747	18.1995	19.8245	18.5245	14.2996	24.3744
1440	17.8746	12.9997	18.5245	19.8245	18.5245	14.2996	24.3744
1450	17.5496	12.6747	18.1995	19.8245	18.1995	14.2996	24.3744
1460	17.8746	12.6747	18.1995	20.1495	18.1995	14.6246	24.3744
1470	17.5496	12.6747	18.5245	20.1495	18.5245	14.2996	24.3744
1480	17.5496	12.9997	18.5245	20.1495	18.1995	14.2996	24.3744
1490	17.8746	12.9997	18.5245	20.4745	18.8495	14.2996	24.6994
1500	17.8746	12.6747	18.5245	20.1495	18.1995	14.2996	24.3744
1510	17.8746	12.6747	18.5245	19.8245	17.8746	13.9747	24.3744
1520	17.5496	12.6747	18.5245	20.1495	18.5245	14.2996	24.6994
1530	17.2246	12.6747	18.1995	20.4745	17.5496	13.9747	24.3744
1540	17.5496	12.3497	18.5245	19.8245	18.1995	13.9747	24.3744
1550	17.5496	12.6747	18.5245	19.8245	18.5245	13.9747	24.3744
1560	17.2246	12.6747	18.1995	19.8245	18.1995	14.2996	24.0494
1570	17.5496	12.6747	18.1995	20.1495	18.1995	14.2996	24.3744
1580	17.2246	12.6747	18.1995	20.1495	18.1995	13.9747	24.3744
1590	17.5496	12.6747	18.1995	20.4745	18.1995	14.2996	24.6994
1600	17.5496	12.6747	18.1995	20.4745	18.1995	14.6246	24.6994
1610	17.5496	12.6747	18.1995	20.4745	18.5245	14.2996	24.3744
1620	17.8746	12.6747	18.5245	19.8245	18.5245	14.6246	24.6994
1630	17.2246	12.6747	18.1995	19.8245	18.5245	14.2996	24.6994
1640	17.5496	12.6747	18.5245	19.8245	18.1995	14.2996	24.6994
1650	17.5496	12.6747	18.1995	19.8245	18.5245	14.6246	24.6994
1660	17.5496	12.6747	18.1995	19.8245	17.8746	14.2996	24.6994
1670	17.8746	12.6747	18.1995	19.8245	18.1995	14.2996	24.6994
1680	17.5496	12.3497	18.1995	20.1495	18.1995	14.2996	25.0244
1690	17.5496	12.6747	18.1995	19.8245	18.1995	14.6246	25.0244
1700	17.5496	12.6747	18.1995	19.8245	18.1995	13.9747	24.6994
1710	18.1995	12.6747	18.1995	20.1495	18.1995	14.2996	24.6994
1720	17.8746	12.6747	18.1995	19.8245	18.1995	14.2996	24.6994
1730	17.5496	12.6747	18.1995	20.1495	18.1995	13.6497	24.6994
1740	17.5496	12.6747	18.1995	20.1495	18.5245	14.2996	25.0244
1750	17.8746	12.6747	18.1995	19.8245	17.8746	13.6497	24.6994
1760	17.8746	12.6747	18.1995	19.8245	18.5245	13.9747	24.6994
1770	18.1995	12.9997	18.5245	19.8245	18.1995	13.9747	24.6994
1780	17.5496	12.6747	18.5245	20.1495	18.1995	13.9747	25.0244
1790	17.8746	12.6747	18.5245	20.1495	18.5245	14.2996	24.6994

## Sheet: 100nM
Stimulation
Time	BGBV-218_0000	BGBV-323_0000	BGBV-324_0000	BGBV-325_0000	BGBV-326_0000	BGBV-329_0000	BGBV-373_0000	BGBV-374_0000
-300	10.0747	15.2746	21.1245	28.5993	11.6997	22.4244	11.3747	26.6493
-290	10.3997	15.2746	21.7745	29.2493	11.3747	22.4244	11.3747	26.9743
-280	10.3997	14.9496	21.4495	28.5993	11.3747	22.4244	11.0497	26.6493
-270	10.3997	15.5996	21.1245	28.5993	11.6997	22.0994	11.3747	26.9743
-260	10.0747	14.6246	21.1245	29.2493	11.3747	22.7494	11.3747	26.6493
-250	10.3997	14.9496	21.4495	28.9243	11.3747	22.4244	11.3747	26.9743
-240	10.0747	15.2746	21.4495	28.9243	11.3747	22.7494	11.0497	26.9743
-230	10.7247	14.6246	21.1245	29.2493	11.0497	22.7494	11.3747	26.6493
-220	10.0747	14.9496	21.7745	29.2493	11.6997	22.4244	11.3747	26.6493
-210	10.0747	14.9496	21.1245	29.2493	12.0247	22.4244	11.0497	26.9743
-200	9.74976	15.2746	21.1245	28.9243	11.6997	22.4244	11.0497	26.9743
-190	10.0747	15.2746	21.1245	29.5743	11.3747	22.0994	11.0497	26.9743
-180	10.0747	15.2746	21.1245	29.5743	12.0247	22.0994	11.0497	26.9743
-170	10.0747	15.2746	21.1245	29.2493	11.3747	22.4244	11.3747	27.2993
-160	10.0747	15.2746	21.1245	28.9243	12.0247	22.4244	11.0497	26.9743
-150	9.74976	15.2746	21.4495	29.5743	12.0247	22.4244	11.0497	26.9743
-140	9.74976	15.2746	21.4495	28.9243	12.0247	22.4244	11.3747	26.9743
-130	9.74976	15.2746	21.7745	28.9243	12.0247	22.4244	11.0497	26.9743
-120	9.74976	15.2746	21.4495	28.9243	11.6997	22.4244	11.3747	27.2993
-110	9.74976	15.5996	21.1245	28.9243	11.6997	22.4244	11.3747	26.9743
-100	9.74976	15.2746	21.7745	28.9243	12.0247	22.0994	11.6997	27.2993
-90	9.42476	15.5996	21.7745	29.2493	12.0247	22.0994	11.3747	26.9743
-80	10.0747	15.5996	21.4495	28.5993	12.0247	22.0994	11.6997	27.2993
-70	10.3997	15.2746	21.7745	28.9243	12.0247	22.0994	11.6997	27.2993
-60	10.0747	15.5996	21.7745	28.5993	11.6997	22.0994	11.0497	26.9743
-50	10.3997	15.5996	21.7745	28.2743	11.6997	22.0994	11.6997	27.2993
-40	10.0747	15.5996	21.4495	28.5993	12.3497	21.7745	11.3747	27.2993
-30	10.0747	15.2746	21.7745	28.5993	12.0247	22.0994	11.3747	27.2993
-20	9.74976	15.5996	21.7745	28.2743	12.0247	21.7745	11.3747	27.2993
-10	9.74976	14.9496	21.4495	28.2743	11.6997	22.4244	11.3747	26.9743
0	10.0747	15.2746	21.4495	28.5993	12.0247	21.7745	11.3747	26.9743
10	9.74976	15.2746	21.7745	28.2743	12.0247	21.7745	11.3747	26.9743
20	10.0747	15.5996	21.4495	28.5993	11.3747	22.0994	11.3747	26.9743
30	9.74976	15.5996	21.7745	28.9243	11.3747	21.7745	11.6997	26.9743
40	9.09977	15.5996	21.7745	28.5993	11.3747	21.7745	11.6997	26.9743
50	9.74976	15.5996	22.0994	28.5993	11.3747	21.7745	11.6997	27.6243
60	10.0747	15.5996	21.4495	28.2743	11.0497	21.7745	11.3747	26.9743
70	10.0747	15.2746	21.4495	28.5993	11.3747	22.4244	11.0497	26.9743
80	10.0747	15.2746	21.7745	28.5993	11.6997	21.7745	11.0497	26.9743
90	9.42476	15.5996	22.4244	28.9243	11.3747	22.4244	11.0497	26.9743
100	10.0747	15.5996	22.4244	28.5993	11.0497	22.4244	11.0497	27.2993
110	10.0747	15.5996	22.0994	28.5993	11.3747	22.0994	10.7247	26.9743
120	9.74976	15.5996	22.4244	28.5993	11.3747	22.0994	10.7247	26.9743
130	9.74976	15.5996	22.4244	28.9243	11.3747	22.0994	11.0497	27.2993
140	10.0747	15.5996	21.7745	28.2743	11.3747	22.7494	10.7247	27.2993
150	10.0747	15.2746	21.7745	28.5993	11.6997	22.4244	11.0497	26.9743
160	10.0747	15.5996	22.0994	28.5993	11.3747	22.4244	11.0497	26.9743
170	10.0747	15.5996	22.0994	28.9243	11.3747	22.4244	10.7247	27.6243
180	9.42476	15.2746	21.1245	28.5993	11.3747	22.7494	11.0497	27.2993
190	9.09977	15.5996	21.7745	28.5993	11.0497	22.4244	11.0497	27.2993
200	9.74976	15.5996	21.4495	28.2743	11.3747	23.0744	10.7247	27.2993
210	9.74976	15.5996	21.7745	28.5993	11.3747	23.0744	11.0497	26.9743
220	9.09977	15.2746	22.0994	28.2743	11.3747	23.0744	11.0497	27.2993
230	9.74976	15.5996	21.7745	28.5993	11.0497	23.0744	10.7247	26.9743
240	9.42476	14.9496	21.7745	28.9243	11.0497	23.0744	10.7247	26.9743
250	9.42476	14.9496	22.0994	29.2493	11.0497	23.0744	11.0497	27.2993
260	10.0747	15.2746	21.7745	28.5993	11.0497	22.4244	10.7247	26.9743
270	9.74976	15.2746	22.0994	28.9243	11.3747	22.4244	10.7247	27.2993
280	9.74976	14.9496	21.7745	28.9243	11.3747	22.7494	11.0497	26.9743
290	9.42476	15.2746	21.7745	28.5993	11.0497	22.0994	10.7247	27.2993
300	9.42476	15.2746	21.7745	29.2493	11.0497	22.4244	10.7247	27.2993
310	9.74976	14.9496	21.7745	28.5993	11.3747	22.7494	10.7247	27.2993
320	10.0747	15.2746	21.7745	28.5993	11.3747	22.0994	10.3997	27.2993
330	9.74976	15.2746	22.4244	28.5993	11.6997	21.7745	10.3997	27.2993
340	9.42476	15.2746	22.0994	28.5993	10.7247	22.4244	10.3997	27.2993
350	10.0747	14.6246	21.7745	28.9243	11.3747	22.4244	10.7247	27.2993
360	9.74976	15.2746	22.4244	28.5993	11.0497	22.0994	10.3997	27.2993
370	9.42476	15.2746	22.0994	28.9243	11.3747	22.0994	10.3997	27.2993
380	9.42476	14.9496	22.0994	28.5993	11.0497	22.4244	10.3997	27.2993
390	9.42476	15.2746	21.7745	28.5993	11.3747	23.0744	10.7247	27.2993
400	10.0747	14.9496	21.7745	29.2493	11.3747	22.0994	10.7247	27.2993
410	9.74976	14.9496	21.4495	28.9243	11.6997	22.7494	10.7247	26.9743
420	9.42476	14.9496	21.7745	28.5993	11.0497	22.0994	10.7247	27.2993
430	9.42476	14.9496	22.0994	28.9243	11.3747	22.4244	10.3997	27.2993
440	9.09977	14.9496	22.0994	28.2743	11.0497	22.4244	10.3997	27.2993
450	8.77478	14.9496	22.0994	28.2743	11.3747	22.4244	10.3997	26.9743
460	9.09977	14.9496	21.7745	28.2743	11.0497	22.0994	10.3997	27.6243
470	8.77478	14.9496	22.0994	28.9243	11.0497	22.4244	10.0747	26.9743
480	8.77478	14.9496	21.7745	28.5993	11.3747	22.4244	10.7247	27.2993
490	9.09977	14.9496	22.4244	28.2743	11.3747	22.0994	10.3997	27.6243
500	9.42476	14.6246	22.4244	28.2743	11.3747	22.0994	10.0747	27.2993
510	9.42476	14.9496	22.4244	28.2743	10.7247	21.7745	10.3997	27.2993
520	9.09977	14.9496	21.7745	28.2743	11.0497	22.0994	10.3997	27.2993
530	8.77478	14.9496	22.4244	28.5993	11.3747	21.4495	10.0747	27.6243
540	8.77478	14.9496	22.4244	28.5993	11.3747	22.0994	10.3997	27.2993
550	8.77478	14.9496	22.4244	28.2743	11.3747	22.0994	10.3997	27.2993
560	8.77478	14.9496	22.4244	28.5993	11.3747	21.7745	10.0747	27.6243
570	8.77478	14.9496	22.7494	28.5993	11.0497	22.7494	10.3997	27.2993
580	9.09977	15.2746	22.7494	28.5993	11.3747	21.7745	10.3997	27.2993
590	9.09977	14.9496	22.4244	28.9243	11.3747	22.0994	10.0747	27.6243
600	9.09977	15.2746	22.7494	28.5993	11.3747	22.0994	10.0747	27.2993
610	8.44979	15.2746	22.4244	28.5993	11.3747	21.7745	10.0747	27.6243
620	8.77478	14.9496	23.0744	28.2743	11.3747	21.7745	10.3997	27.2993
630	8.77478	15.2746	22.7494	28.9243	11.6997	21.4495	10.3997	27.6243
640	9.09977	15.2746	22.7494	29.2493	11.0497	21.7745	9.74976	27.2993
650	9.09977	14.9496	22.7494	29.2493	11.3747	21.7745	10.3997	27.2993
660	9.09977	14.6246	23.0744	28.5993	11.0497	21.7745	10.0747	27.2993
670	9.09977	14.6246	22.4244	28.5993	11.0497	21.7745	10.0747	27.2993
680	9.09977	14.9496	22.4244	28.2743	11.0497	21.7745	10.0747	26.9743
690	8.77478	14.9496	22.4244	28.9243	11.3747	21.7745	10.3997	27.2993
700	8.77478	14.9496	22.7494	28.5993	11.0497	21.7745	10.0747	27.2993
710	9.09977	14.9496	22.4244	28.5993	11.0497	22.4244	10.0747	27.2993
720	9.09977	14.9496	22.4244	28.5993	11.0497	21.4495	10.3997	27.6243
730	9.42476	15.2746	22.7494	28.9243	11.0497	21.7745	10.3997	27.2993
740	8.77478	14.9496	22.7494	28.2743	11.0497	22.0994	10.7247	27.6243
750	9.09977	14.9496	22.7494	28.2743	11.3747	22.0994	10.0747	27.2993
760	9.09977	15.5996	22.7494	28.5993	11.0497	22.4244	10.0747	27.6243
770	8.77478	14.9496	23.0744	28.2743	11.3747	21.7745	10.0747	27.2993
780	9.09977	15.2746	23.0744	28.2743	11.0497	22.4244	10.0747	27.2993
790	9.09977	14.9496	22.7494	29.2493	11.3747	21.7745	10.3997	27.6243
800	9.42476	14.9496	22.7494	28.2743	11.0497	21.7745	10.3997	27.6243
810	9.42476	14.6246	22.7494	28.2743	10.7247	22.0994	10.3997	27.6243
820	9.42476	14.9496	22.7494	28.9243	11.0497	22.0994	10.0747	27.6243
830	8.77478	14.9496	22.4244	28.5993	11.3747	22.4244	10.0747	27.9493
840	9.42476	14.9496	22.4244	28.2743	11.0497	22.0994	10.0747	27.2993
850	9.09977	14.9496	22.7494	28.2743	11.3747	21.7745	10.0747	27.6243
860	9.42476	14.9496	22.0994	27.6243	11.0497	21.7745	10.3997	27.2993
870	9.42476	14.9496	21.7745	28.2743	11.3747	22.7494	10.7247	27.6243
880	9.42476	14.6246	22.0994	27.6243	11.3747	22.0994	10.3997	27.6243
890	9.42476	14.6246	22.0994	27.9493	11.3747	22.0994	10.3997	27.2993
900	9.42476	14.6246	22.4244	27.9493	11.0497	22.7494	10.0747	27.9493
910	9.42476	14.9496	22.0994	27.6243	11.6997	22.7494	10.0747	27.2993
920	9.09977	14.9496	22.7494	28.2743	11.3747	23.0744	10.7247	27.6243
930	9.09977	14.6246	22.7494	27.9493	11.0497	22.7494	10.3997	27.2993
940	9.09977	14.9496	23.0744	28.2743	11.3747	21.7745	10.3997	27.2993
950	9.09977	14.2996	23.0744	28.5993	11.3747	22.4244	10.0747	27.2993
960	9.09977	14.9496	22.4244	28.2743	11.3747	22.4244	10.7247	27.2993
970	9.09977	14.2996	22.7494	28.5993	11.3747	22.0994	10.0747	27.6243
980	9.09977	14.9496	22.7494	28.2743	11.3747	22.0994	10.7247	27.6243
990	9.42476	14.6246	23.0744	28.2743	11.3747	22.0994	10.7247	27.2993
1000	9.09977	14.2996	22.4244	28.2743	11.0497	21.7745	10.7247	27.6243
1010	9.09977	14.6246	22.4244	28.5993	11.3747	22.0994	10.0747	27.9493
1020	9.42476	14.6246	22.7494	28.2743	11.3747	21.7745	10.3997	27.6243
1030	9.42476	14.9496	22.0994	28.5993	12.0247	20.4745	10.3997	27.9493
1040	9.09977	14.6246	22.4244	28.5993	11.3747	21.4495	10.3997	28.2743
1050	9.42476	14.6246	22.7494	28.5993	12.0247	20.7995	10.3997	27.9493
1060	9.42476	14.2996	22.7494	27.9493	11.3747	21.1245	10.0747	27.2993
1070	9.09977	14.2996	22.7494	28.9243	11.6997	20.7995	10.3997	27.6243
1080	9.09977	14.2996	23.0744	28.5993	11.3747	21.1245	10.3997	27.9493
1090	9.09977	14.6246	23.0744	28.2743	11.0497	21.4495	10.7247	27.9493
1100	9.09977	14.6246	23.3994	28.2743	11.3747	21.1245	10.7247	27.9493
1110	9.09977	14.2996	23.0744	27.9493	11.3747	21.1245	10.3997	27.9493
1120	9.42476	14.2996	23.3994	28.2743	11.0497	20.7995	10.7247	27.9493
1130	9.09977	14.2996	23.0744	28.5993	11.3747	21.1245	10.3997	27.9493
1140	9.09977	14.2996	23.0744	27.9493	11.0497	21.1245	10.0747	27.9493
1150	8.44979	14.6246	23.0744	28.2743	11.3747	20.7995	10.0747	27.9493
1160	9.09977	14.2996	23.0744	28.2743	11.0497	20.7995	10.0747	27.9493
1170	9.74976	14.6246	23.0744	27.9493	11.3747	20.7995	10.0747	27.6243
1180	9.42476	14.6246	23.0744	28.5993	11.0497	21.4495	10.0747	27.2993
1190	9.09977	14.6246	23.3994	27.9493	11.0497	20.7995	10.3997	27.2993
1200	9.09977	14.6246	23.3994	28.2743	11.0497	20.7995	10.0747	27.2993
1210	9.09977	14.2996	23.3994	28.5993	11.3747	21.1245	10.0747	27.6243
1220	9.09977	14.6246	23.3994	28.5993	11.3747	20.7995	9.74976	27.6243
1230	9.42476	14.6246	23.7244	28.2743	11.3747	21.1245	10.0747	27.2993
1240	9.42476	14.2996	23.3994	28.2743	11.3747	21.1245	10.0747	27.2993
1250	8.77478	14.6246	23.3994	28.5993	12.0247	21.1245	9.74976	27.2993
1260	9.42476	14.6246	23.0744	28.5993	11.6997	21.1245	9.74976	27.6243
1270	9.42476	14.2996	23.3994	28.2743	11.0497	21.1245	10.0747	27.2993
1280	9.09977	14.2996	23.0744	28.2743	11.3747	20.4745	10.0747	27.6243
1290	8.77478	14.6246	23.3994	28.2743	11.6997	22.7494	9.74976	27.2993
1300	9.09977	14.6246	23.7244	28.5993	11.3747	21.7745	10.0747	27.2993
1310	9.09977	14.2996	23.7244	28.9243	11.3747	21.7745	10.0747	27.6243
1320	8.77478	14.2996	23.3994	28.5993	11.0497	22.0994	9.74976	27.9493
1330	9.09977	14.2996	23.7244	27.9493	11.6997	21.7745	10.3997	27.6243
1340	9.42476	14.2996	23.7244	28.9243	11.3747	21.7745	10.0747	27.2993
1350	9.09977	14.2996	23.7244	28.5993	11.0497	21.4495	10.0747	27.9493
1360	9.09977	14.2996	23.7244	29.2493	11.0497	21.7745	10.3997	27.6243
1370	9.09977	14.2996	23.7244	28.5993	11.0497	22.0994	10.0747	27.6243
1380	9.42476	14.6246	23.7244	27.9493	11.3747	22.0994	10.3997	27.6243
1390	9.42476	14.2996	23.7244	28.5993	11.6997	22.0994	10.3997	27.2993
1400	9.09977	14.2996	23.3994	28.5993	11.0497	22.4244	9.74976	27.9493
1410	9.09977	13.9747	24.0494	28.5993	11.6997	21.7745	9.42476	27.6243
1420	9.09977	13.9747	23.7244	28.9243	11.3747	22.0994	9.74976	27.6243
1430	9.09977	13.9747	23.7244	28.5993	11.0497	22.0994	9.74976	27.6243
1440	8.44979	13.9747	23.7244	28.9243	11.3747	22.0994	10.3997	27.9493
1450	9.42476	13.9747	24.0494	28.9243	11.3747	21.7745	10.0747	27.2993
1460	9.09977	14.2996	24.0494	28.5993	11.3747	21.7745	10.3997	27.9493
1470	9.09977	13.6497	23.3994	28.5993	11.3747	21.7745	9.74976	27.6243
1480	9.09977	13.6497	24.3744	28.9243	11.6997	22.0994	10.3997	27.6243
1490	9.09977	13.9747	24.0494	28.9243	12.0247	22.7494	10.0747	27.2993
1500	9.09977	13.6497	24.0494	28.5993	11.3747	22.4244	9.42476	27.2993
1510	9.09977	13.9747	24.6994	29.2493	11.0497	21.7745	10.0747	27.2993
1520	9.09977	13.9747	24.3744	29.2493	11.3747	22.0994	10.0747	27.6243
1530	9.09977	13.6497	23.7244	28.5993	11.0497	22.0994	10.3997	27.6243
1540	9.09977	13.9747	24.3744	29.2493	10.7247	21.7745	9.74976	27.2993
1550	9.42476	14.2996	24.0494	28.5993	11.6997	21.7745	10.3997	27.2993
1560	9.09977	13.6497	24.0494	28.2743	11.3747	22.4244	10.0747	27.2993
1570	8.77478	13.3247	24.3744	28.5993	11.6997	21.7745	9.74976	27.6243
1580	9.09977	13.3247	24.3744	28.9243	11.0497	22.0994	10.0747	27.2993
1590	9.09977	13.6497	24.3744	28.2743	11.0497	21.7745	9.74976	27.6243
1600	9.09977	13.3247	24.3744	28.5993	11.0497	21.7745	10.0747	27.9493
1610	8.77478	13.6497	24.0494	28.2743	11.3747	21.7745	9.74976	27.2993
1620	9.09977	13.3247	23.3994	28.2743	11.0497	21.7745	10.3997	27.6243
1630	9.09977	13.6497	23.0744	27.9493	11.3747	22.4244	10.3997	27.6243
1640	8.77478	13.3247	23.3994	28.5993	10.7247	21.7745	9.74976	27.6243
1650	9.09977	13.9747	22.7494	27.9493	11.3747	22.0994	9.42476	27.2993
1660	8.77478	13.3247	22.7494	28.5993	11.3747	21.7745	10.3997	27.6243
1670	9.09977	13.3247	23.3994	28.2743	11.3747	21.7745	10.0747	27.6243
1680	9.09977	13.6497	23.0744	28.2743	10.7247	21.7745	9.42476	27.9493
1690	9.09977	13.3247	23.3994	28.5993	11.6997	21.7745	9.74976	27.2993
1700	8.77478	13.6497	22.7494	28.2743	11.3747	21.7745	10.0747	27.2993
1710	8.77478	13.3247	23.3994	27.9493	11.3747	21.7745	9.42476	27.2993
1720	8.77478	13.3247	23.0744	28.2743	11.0497	21.4495	9.74976	27.2993
1730	9.09977	13.6497	23.0744	28.2743	11.6997	22.0994	10.0747	27.2993
1740	8.77478	12.9997	22.7494	28.2743	11.0497	22.4244	10.0747	27.6243
1750	8.77478	13.3247	23.0744	28.2743	11.0497	21.7745	9.74976	27.2993
1760	8.77478	13.3247	23.7244	28.5993	11.0497	22.0994	10.0747	27.6243
1770	9.09977	13.6497	23.0744	27.9493	11.6997	22.0994	9.42476	27.6243
1780	8.77478	13.6497	23.0744	28.2743	11.3747	22.0994	10.0747	27.6243
1790	9.09977	13.3247	23.3994	28.5993	11.3747	21.7745	9.42476	27.9493

## Sheet: 1µM
Stimulation
Time	BGBV-216_0000(1)	BGBV-216_0000(2)	BGBV-217_0000	BGBV-315_0000	BGBV-317_0000	BGBV-318_0000	BGBV-321_0000
-300	10.7247	12.6747	12.0247	19.4995	17.8746	41.274	15.9246
-290	10.7247	12.6747	12.3497	19.4995	18.1995	41.599	15.5996
-280	11.0497	12.6747	12.6747	19.4995	17.8746	41.274	15.9246
-270	10.7247	12.0247	12.9997	19.4995	17.8746	40.949	15.5996
-260	10.7247	12.3497	12.6747	19.8245	18.1995	40.949	15.9246
-250	11.3747	12.3497	13.3247	19.4995	17.8746	40.949	15.5996
-240	11.0497	12.3497	12.9997	19.8245	17.8746	41.274	15.5996
-230	10.7247	12.6747	12.3497	19.8245	17.8746	41.274	15.5996
-220	11.3747	12.9997	12.6747	19.8245	18.1995	41.274	15.9246
-210	10.7247	12.3497	12.6747	19.4995	17.8746	40.949	16.2496
-200	10.7247	12.6747	12.3497	19.4995	17.8746	41.274	16.2496
-190	10.7247	12.3497	12.3497	19.8245	17.8746	41.599	16.2496
-180	10.7247	12.6747	12.6747	19.8245	17.8746	41.274	16.2496
-170	10.7247	12.6747	12.6747	19.4995	17.8746	41.599	16.2496
-160	11.0497	12.0247	12.3497	20.1495	17.8746	41.599	15.9246
-150	11.0497	12.3497	12.6747	20.1495	17.8746	41.599	15.9246
-140	10.7247	12.6747	12.9997	19.4995	17.8746	41.274	16.2496
-130	10.7247	12.3497	12.3497	19.8245	18.1995	41.599	16.2496
-120	11.0497	12.3497	12.3497	19.4995	17.8746	41.599	16.2496
-110	11.0497	12.0247	12.6747	19.8245	17.8746	41.599	16.2496
-100	10.7247	12.3497	12.3497	19.4995	17.8746	41.599	16.2496
-90	11.0497	12.6747	12.0247	19.8245	18.1995	41.274	16.2496
-80	10.7247	12.6747	12.3497	19.8245	18.1995	41.599	16.2496
-70	11.3747	12.6747	12.3497	19.8245	17.5496	41.274	15.9246
-60	10.7247	12.6747	12.6747	19.4995	17.8746	41.274	16.2496
-50	10.7247	12.6747	12.6747	19.8245	17.5496	41.274	16.2496
-40	11.0497	12.6747	12.3497	19.8245	17.5496	41.274	15.9246
-30	10.7247	12.6747	13.3247	20.1495	17.5496	41.599	16.2496
-20	10.3997	12.6747	12.6747	19.8245	17.8746	41.599	15.9246
-10	10.3997	12.3497	12.0247	19.8245	17.5496	41.599	16.5746
0	11.0497	12.3497	12.3497	19.4995	17.5496	41.274	15.9246
10	10.7247	12.6747	13.3247	20.1495	17.5496	41.599	15.9246
20	10.3997	12.6747	11.0497	19.8245	17.8746	41.599	15.9246
30	10.7247	12.3497	11.6997	19.8245	17.5496	41.599	15.5996
40	10.3997	12.9997	12.3497	19.8245	17.5496	41.274	15.9246
50	10.7247	12.6747	12.3497	20.1495	17.5496	41.599	15.5996
60	10.3997	12.6747	12.6747	19.8245	17.5496	41.599	15.5996
70	10.3997	12.6747	12.0247	19.8245	17.5496	41.599	15.5996
80	10.7247	12.9997	12.3497	19.8245	17.5496	41.599	15.5996
90	11.0497	12.3497	11.0497	19.8245	17.5496	41.599	15.5996
100	11.0497	12.6747	11.0497	19.4995	17.5496	41.599	15.2746
110	10.7247	12.3497	12.0247	19.8245	17.5496	41.599	15.2746
120	10.7247	12.3497	11.6997	19.8245	17.5496	41.599	15.9246
130	10.3997	12.6747	12.0247	19.8245	17.5496	41.924	14.9496
140	10.3997	12.3497	11.0497	19.8245	17.5496	41.599	14.6246
150	10.3997	12.0247	10.0747	19.8245	17.5496	41.924	15.5996
160	10.7247	12.3497	10.7247	19.8245	17.5496	41.924	15.2746
170	10.7247	12.3497	9.74976	20.1495	17.5496	41.924	14.9496
180	10.7247	12.6747	9.09977	19.8245	17.2246	41.924	15.5996
190	10.7247	12.0247	9.42476	19.8245	17.2246	42.2489	15.2746
200	10.7247	12.0247	9.42476	19.8245	17.5496	41.924	15.5996
210	11.0497	12.0247	9.09977	20.1495	17.2246	41.924	15.5996
220	11.0497	12.0247	9.42476	19.8245	17.2246	41.924	15.5996
230	10.7247	12.0247	10.0747	19.8245	17.2246	41.924	15.5996
240	10.3997	12.0247	9.74976	19.8245	17.2246	41.924	15.2746
250	10.7247	11.6997	9.42476	20.1495	17.2246	41.924	15.5996
260	10.7247	12.0247	9.09977	19.8245	17.5496	42.2489	15.5996
270	10.7247	11.6997	8.77478	19.8245	17.2246	41.924	14.9496
280	11.0497	11.6997	9.09977	19.8245	16.8996	41.599	15.2746
290	10.3997	12.0247	9.09977	19.8245	17.2246	41.599	14.2996
300	10.7247	11.6997	9.42476	19.8245	16.8996	41.924	14.9496
310	10.7247	12.0247	8.77478	20.1495	16.8996	41.599	15.2746
320	10.7247	12.0247	9.09977	20.1495	16.8996	41.599	14.9496
330	10.3997	11.6997	9.42476	19.8245	16.8996	41.924	14.9496
340	10.3997	11.6997	8.77478	20.1495	17.2246	41.599	14.9496
350	11.0497	11.6997	8.77478	20.1495	17.2246	41.924	15.2746
360	10.0747	11.6997	8.77478	20.1495	17.2246	41.924	15.2746
370	10.7247	12.0247	8.44979	19.8245	17.2246	41.924	15.5996
380	10.7247	12.0247	8.77478	20.4745	17.5496	41.599	15.9246
390	10.7247	12.0247	8.77478	20.4745	17.2246	41.274	14.9496
400	11.0497	12.0247	8.77478	20.4745	17.5496	41.274	14.9496
410	10.7247	12.0247	8.77478	20.4745	17.2246	41.274	15.2746
420	10.7247	11.6997	8.1248	20.1495	17.2246	40.949	15.5996
430	10.7247	12.0247	8.44979	20.1495	17.2246	40.949	15.2746
440	10.3997	11.6997	8.1248	20.4745	17.2246	40.624	14.9496
450	11.0497	11.6997	8.77478	20.7995	17.2246	40.949	14.9496
460	10.7247	12.0247	8.77478	20.4745	17.2246	40.624	15.2746
470	10.7247	11.6997	8.44979	20.1495	16.8996	40.624	15.2746
480	10.7247	11.6997	8.44979	20.4745	16.8996	40.624	15.5996
490	10.7247	12.0247	8.1248	20.4745	16.8996	40.624	14.9496
500	11.0497	11.6997	8.77478	20.4745	16.8996	40.624	14.9496
510	10.3997	11.6997	8.44979	20.4745	16.8996	40.624	14.9496
520	11.0497	12.0247	8.1248	20.4745	16.8996	41.274	14.9496
530	10.7247	11.3747	8.77478	20.4745	16.8996	40.949	14.9496
540	11.0497	11.3747	9.09977	20.1495	16.8996	40.949	14.9496
550	10.7247	11.6997	8.77478	20.4745	16.5746	40.949	14.6246
560	10.3997	11.6997	8.77478	20.1495	16.8996	41.274	14.9496
570	11.0497	11.6997	9.09977	20.4745	16.8996	41.274	14.9496
580	10.7247	11.3747	9.09977	20.4745	16.8996	41.274	14.9496
590	11.0497	11.6997	9.42476	20.1495	16.8996	41.274	14.9496
600	10.7247	11.6997	9.09977	20.1495	16.8996	41.274	14.6246
610	10.7247	11.6997	9.09977	20.4745	16.8996	41.599	15.2746
620	11.0497	11.6997	9.74976	20.1495	16.8996	41.274	15.2746
630	10.7247	11.6997	9.09977	20.1495	16.8996	41.599	15.2746
640	10.7247	11.6997	9.42476	20.1495	16.8996	41.274	14.9496
650	11.0497	11.6997	9.42476	19.8245	16.8996	41.599	14.9496
660	11.0497	11.6997	9.74976	20.1495	16.8996	41.274	14.9496
670	11.0497	11.6997	9.74976	20.1495	16.8996	41.274	14.9496
680	10.3997	11.6997	9.42476	20.4745	16.8996	41.274	14.6246
690	11.0497	11.6997	10.0747	20.1495	16.8996	40.949	14.6246
700	10.7247	12.0247	9.74976	20.1495	16.8996	41.599	14.6246
710	11.0497	11.6997	9.74976	20.1495	16.8996	41.599	14.9496
720	10.7247	12.0247	9.74976	20.1495	16.5746	41.599	14.9496
730	10.7247	11.6997	9.74976	20.4745	16.5746	40.949	14.9496
740	11.0497	12.0247	9.42476	20.1495	16.8996	41.274	14.9496
750	10.3997	11.6997	10.0747	20.1495	16.8996	41.599	14.9496
760	10.7247	11.6997	9.42476	20.1495	16.8996	41.599	14.6246
770	10.7247	11.6997	9.42476	20.4745	16.8996	41.599	14.6246
780	11.0497	12.3497	9.42476	20.1495	16.8996	41.599	14.6246
790	11.0497	12.0247	9.42476	20.1495	16.8996	41.599	14.6246
800	10.7247	12.0247	9.42476	20.1495	16.5746	41.274	14.6246
810	11.0497	12.0247	9.42476	20.1495	16.8996	41.274	14.6246
820	10.7247	12.0247	9.42476	20.1495	16.5746	41.924	14.6246
830	11.0497	12.0247	9.74976	20.1495	16.5746	41.599	14.6246
840	10.7247	12.3497	10.0747	20.1495	16.5746	41.599	14.6246
850	10.7247	12.3497	10.0747	20.1495	16.5746	41.924	14.9496
860	10.7247	11.6997	10.0747	19.8245	16.5746	41.924	14.9496
870	11.0497	11.6997	9.74976	20.1495	16.8996	41.599	14.2996
880	11.0497	12.3497	10.0747	20.1495	16.5746	41.599	14.6246
890	11.0497	12.0247	10.3997	20.1495	16.5746	41.599	14.9496
900	10.7247	12.0247	10.0747	20.1495	16.8996	41.599	14.2996
910	10.7247	12.0247	9.74976	20.1495	16.5746	41.274	14.2996
920	11.0497	12.0247	10.0747	20.1495	16.5746	41.924	14.6246
930	10.7247	12.3497	10.7247	20.1495	16.5746	41.599	14.2996
940	10.3997	12.0247	10.0747	20.1495	16.5746	41.599	14.2996
950	11.0497	12.0247	10.3997	20.1495	16.5746	41.599	14.2996
960	10.7247	12.0247	10.3997	19.8245	16.2496	41.599	13.9747
970	10.7247	12.3497	10.0747	20.1495	16.5746	41.924	14.2996
980	10.7247	12.3497	10.0747	20.1495	16.2496	41.924	14.2996
990	10.7247	12.0247	11.0497	19.8245	16.2496	41.924	14.9496
1000	10.7247	12.3497	10.3997	20.1495	16.2496	41.599	14.9496
1010	10.3997	12.0247	10.3997	20.1495	16.2496	41.924	14.2996
1020	11.0497	11.6997	10.3997	19.8245	16.5746	41.924	14.9496
1030	10.7247	11.6997	10.3997	20.1495	16.5746	42.2489	14.6246
1040	10.7247	12.0247	10.3997	20.1495	16.5746	41.924	14.9496
1050	11.0497	12.3497	11.0497	20.1495	16.2496	41.599	14.9496
1060	10.7247	12.0247	10.3997	20.1495	16.2496	42.2489	14.6246
1070	11.0497	12.3497	10.0747	19.8245	16.5746	42.2489	14.2996
1080	10.7247	12.3497	10.7247	20.1495	16.5746	42.2489	14.9496
1090	10.7247	12.3497	10.3997	20.1495	16.5746	42.2489	14.2996
1100	10.7247	12.3497	10.7247	20.1495	16.5746	42.2489	14.2996
1110	11.0497	12.3497	10.7247	20.1495	16.5746	42.2489	14.9496
1120	10.3997	12.3497	10.7247	20.1495	16.5746	42.2489	14.6246
1130	10.0747	12.0247	11.0497	19.8245	16.5746	42.2489	14.6246
1140	10.7247	12.6747	11.0497	20.1495	16.5746	42.2489	14.6246
1150	10.7247	12.3497	10.7247	19.8245	16.5746	42.2489	14.2996
1160	10.7247	12.0247	11.0497	20.1495	16.5746	41.924	13.9747
1170	10.7247	12.3497	11.0497	19.8245	16.8996	42.2489	14.2996
1180	10.7247	12.0247	11.0497	20.1495	16.5746	42.2489	14.6246
1190	10.7247	12.3497	10.7247	19.8245	16.5746	41.924	14.6246
1200	10.7247	12.3497	10.7247	19.4995	16.5746	41.924	14.6246
1210	10.7247	12.0247	10.7247	19.8245	16.8996	42.2489	14.9496
1220	10.7247	12.9997	11.0497	19.8245	16.8996	42.2489	14.6246
1230	11.0497	12.0247	11.3747	19.4995	16.5746	41.924	14.9496
1240	10.7247	12.3497	10.7247	19.4995	16.5746	42.2489	14.6246
1250	11.0497	12.6747	10.7247	19.8245	16.5746	41.924	14.9496
1260	10.7247	12.3497	11.0497	19.4995	16.8996	41.924	14.9496
1270	11.0497	12.3497	10.7247	19.4995	16.5746	42.2489	14.6246
1280	11.3747	12.6747	10.3997	19.4995	16.5746	42.2489	14.9496
1290	11.0497	12.0247	10.7247	19.4995	16.8996	41.924	14.6246
1300	10.7247	12.3497	10.3997	19.4995	16.8996	42.2489	14.9496
1310	10.3997	12.3497	11.3747	19.4995	16.8996	41.924	14.6246
1320	10.7247	12.3497	10.7247	19.8245	16.5746	42.2489	14.6246
1330	10.7247	12.3497	10.3997	19.8245	16.8996	41.924	14.9496
1340	10.7247	12.0247	11.0497	19.8245	16.8996	41.924	14.6246
1350	10.7247	12.3497	10.7247	19.4995	16.5746	42.5739	14.6246
1360	10.7247	12.6747	11.0497	19.4995	16.5746	42.2489	14.2996
1370	11.0497	12.3497	10.7247	19.8245	16.5746	42.2489	14.6246
1380	10.7247	12.3497	11.0497	19.4995	16.8996	42.2489	13.9747
1390	10.7247	12.6747	10.3997	19.4995	16.2496	42.2489	14.9496
1400	10.7247	12.3497	11.3747	19.8245	16.5746	42.5739	14.6246
1410	10.7247	12.3497	11.6997	19.8245	16.5746	42.2489	14.2996
1420	10.7247	12.6747	11.6997	19.8245	16.5746	41.924	13.6497
1430	11.0497	11.6997	11.0497	19.4995	16.5746	41.924	14.2996
1440	10.7247	12.6747	11.0497	19.8245	16.2496	42.2489	14.6246
1450	10.7247	12.3497	10.7247	19.4995	16.5746	42.5739	14.6246
1460	10.7247	12.3497	11.0497	19.4995	16.2496	42.2489	13.9747
1470	10.7247	11.6997	11.6997	19.4995	16.2496	42.2489	14.2996
1480	10.3997	11.6997	10.7247	19.4995	16.5746	42.2489	13.9747
1490	10.7247	12.3497	11.0497	19.1745	15.9246	42.2489	14.2996
1500	10.3997	12.0247	11.0497	19.4995	15.9246	42.2489	13.6497
1510	10.3997	12.3497	11.0497	19.4995	15.9246	42.2489	14.2996
1520	10.7247	12.0247	10.7247	19.1745	15.9246	41.924	13.6497
1530	10.3997	12.0247	10.7247	19.1745	15.9246	41.924	13.3247
1540	10.3997	12.3497	10.3997	19.4995	15.9246	42.2489	13.9747
1550	10.7247	12.6747	11.3747	19.1745	15.9246	41.924	13.3247
1560	10.3997	12.0247	11.0497	19.1745	16.2496	41.924	12.3497
1570	10.0747	12.0247	11.0497	19.1745	16.8996	41.924	12.6747
1580	10.7247	12.3497	11.0497	19.1745	16.2496	41.924	12.9997
1590	10.7247	11.6997	10.7247	19.1745	16.5746	42.2489	12.6747
1600	10.3997	12.0247	10.7247	19.1745	16.2496	41.924	12.9997
1610	10.7247	12.3497	10.7247	19.4995	16.5746	41.924	12.9997
1620	10.7247	12.0247	11.6997	19.1745	16.5746	42.5739	12.3497
1630	10.7247	12.0247	10.3997	19.1745	16.5746	42.2489	11.6997
1640	10.3997	12.0247	11.0497	18.8495	16.5746	42.2489	12.9997
1650	10.7247	12.0247	10.7247	19.1745	16.2496	41.599	13.3247
1660	10.7247	12.6747	11.0497	19.1745	16.8996	42.2489	11.6997
1670	10.7247	12.3497	11.3747	19.1745	16.5746	42.5739	12.6747
1680	10.3997	12.0247	11.0497	18.8495	16.8996	42.2489	12.0247
1690	10.3997	12.3497	11.3747	19.1745	16.5746	42.2489	12.0247
1700	10.7247	12.0247	11.0497	19.1745	16.2496	41.924	11.6997
1710	10.7247	12.0247	11.0497	19.1745	16.2496	42.2489	12.6747
1720	10.3997	12.0247	10.7247	18.8495	16.2496	42.2489	12.6747
1730	10.3997	12.3497	10.3997	19.1745	16.8996	42.2489	13.9747
1740	10.0747	12.0247	10.3997	18.8495	16.5746	42.2489	12.6747
1750	10.3997	12.0247	11.0497	18.8495	16.2496	42.2489	12.9997
1760	10.3997	12.3497	10.7247	18.8495	16.2496	41.924	13.6497
1770	10.3997	12.0247	11.3747	18.8495	16.2496	42.5739	13.3247
1780	10.3997	11.6997	11.3747	18.8495	16.2496	42.2489	13.6497
1790	10.3997	12.0247	10.7247	18.8495	16.5746	42.2489	13.6497

## Sheet: 10µM
Stimulation
Time	BGBV-215_0000	BGBV-242_0000	BGBV-286_0000	BGBV-287_0000	BGBV-288_0000	BGBV-289_0000
-300	12.6747	15.9246	17.2246	13.3247	12.3497	14.2996
-290	12.6747	15.5996	17.2246	12.9997	12.3497	14.2996
-280	12.0247	15.9246	17.8746	13.3247	12.3497	14.6246
-270	12.0247	15.5996	17.5496	13.3247	12.3497	14.9496
-260	12.0247	15.9246	17.5496	12.9997	12.3497	14.9496
-250	12.3497	15.5996	17.2246	13.3247	12.6747	14.9496
-240	12.3497	15.5996	17.5496	12.9997	12.6747	13.9747
-230	12.3497	15.5996	17.5496	13.3247	12.6747	14.6246
-220	12.3497	15.5996	17.2246	12.9997	12.6747	14.6246
-210	12.3497	15.5996	17.2246	12.9997	12.3497	14.9496
-200	12.6747	15.9246	16.8996	12.9997	12.6747	14.6246
-190	12.6747	15.5996	16.5746	12.9997	12.6747	14.2996
-180	12.6747	15.9246	17.2246	12.9997	12.3497	14.2996
-170	12.3497	15.2746	17.5496	13.3247	12.3497	14.2996
-160	12.6747	15.2746	17.5496	13.3247	12.6747	14.6246
-150	12.3497	15.5996	17.5496	12.9997	12.3497	14.9496
-140	12.6747	15.2746	17.5496	13.3247	12.6747	14.6246
-130	12.6747	15.5996	17.2246	13.3247	12.3497	14.2996
-120	12.6747	15.2746	17.5496	13.3247	12.3497	14.2996
-110	12.6747	15.5996	17.5496	13.3247	12.3497	14.6246
-100	12.3497	15.9246	17.2246	13.3247	12.3497	14.2996
-90	12.6747	15.9246	17.5496	13.3247	12.3497	14.6246
-80	12.6747	15.9246	17.5496	12.9997	12.3497	14.2996
-70	12.6747	15.5996	17.5496	13.3247	12.6747	14.6246
-60	12.6747	15.2746	17.5496	12.9997	12.3497	14.6246
-50	12.6747	15.5996	17.2246	13.3247	12.3497	14.2996
-40	12.3497	15.5996	17.5496	13.3247	12.3497	14.2996
-30	12.3497	15.5996	17.2246	12.9997	12.3497	14.6246
-20	12.0247	15.2746	17.2246	13.6497	12.3497	14.6246
-10	12.0247	14.9496	17.5496	13.3247	12.3497	14.6246
0	11.6997	15.2746	17.2246	13.6497	12.3497	14.6246
10	11.3747	15.2746	17.2246	12.9997	12.3497	14.2996
20	12.0247	15.2746	17.5496	13.6497	12.0247	14.6246
30	11.6997	14.9496	17.2246	13.6497	12.3497	14.2996
40	11.3747	14.9496	17.2246	13.3247	12.3497	13.9747
50	11.3747	14.9496	17.5496	13.3247	12.3497	14.2996
60	11.3747	15.2746	17.2246	13.3247	12.6747	14.2996
70	11.0497	15.2746	17.2246	12.6747	12.3497	14.6246
80	11.6997	15.2746	17.2246	12.9997	12.3497	14.2996
90	11.6997	15.2746	17.2246	13.6497	12.3497	14.2996
100	11.6997	15.2746	17.5496	13.3247	12.3497	14.2996
110	11.6997	15.2746	17.2246	13.3247	12.3497	14.6246
120	12.0247	14.6246	16.8996	13.3247	12.6747	14.6246
130	11.6997	15.2746	17.2246	13.6497	12.3497	14.2996
140	11.6997	14.9496	17.2246	12.6747	12.3497	13.9747
150	11.0497	14.6246	17.2246	13.3247	12.3497	14.2996
160	10.7247	14.9496	17.2246	12.9997	12.3497	14.2996
170	10.0747	15.2746	17.2246	13.3247	12.3497	14.6246
180	10.0747	14.9496	17.2246	13.6497	12.0247	13.9747
190	10.0747	14.9496	17.5496	13.6497	12.3497	14.2996
200	9.74976	14.9496	17.2246	13.3247	12.3497	13.9747
210	9.09977	14.6246	17.2246	13.6497	12.3497	13.9747
220	9.09977	14.6246	17.2246	13.3247	12.0247	14.6246
230	9.09977	14.6246	17.8746	13.3247	12.0247	14.6246
240	9.09977	14.2996	17.5496	13.3247	12.0247	14.2996
250	8.77478	14.2996	17.2246	12.9997	12.0247	14.2996
260	8.77478	14.2996	17.5496	13.6497	12.3497	14.2996
270	8.77478	14.2996	16.8996	12.9997	12.0247	14.2996
280	8.77478	14.6246	17.2246	12.9997	12.0247	14.2996
290	8.77478	14.2996	17.5496	12.9997	12.0247	15.2746
300	9.09977	14.2996	17.2246	13.3247	12.3497	15.2746
310	9.09977	14.2996	16.8996	13.3247	12.0247	15.5996
320	8.77478	14.2996	17.2246	13.3247	12.0247	15.2746
330	9.09977	14.2996	16.8996	12.9997	12.3497	14.2996
340	9.09977	14.2996	16.5746	12.6747	12.0247	14.6246
350	9.09977	14.2996	16.5746	12.9997	12.0247	14.2996
360	8.77478	14.2996	16.2496	12.3497	12.3497	13.3247
370	8.77478	14.2996	16.2496	12.6747	12.0247	14.6246
380	8.77478	14.2996	14.6246	12.6747	12.3497	13.6497
390	8.77478	14.6246	14.6246	12.9997	12.3497	13.3247
400	8.77478	14.6246	14.9496	12.3497	12.6747	12.9997
410	8.77478	14.6246	13.9747	12.6747	12.3497	12.9997
420	8.77478	14.9496	14.6246	12.6747	12.3497	12.9997
430	8.77478	14.6246	14.2996	12.3497	12.3497	12.9997
440	9.09977	14.6246	14.9496	12.3497	12.3497	11.6997
450	9.42476	14.9496	14.9496	12.3497	12.3497	12.0247
460	9.42476	14.6246	13.9747	12.3497	12.3497	11.3747
470	9.74976	14.6246	14.9496	12.3497	12.3497	10.3997
480	10.0747	14.6246	15.2746	12.0247	12.3497	11.0497
490	10.0747	14.9496	15.5996	12.3497	12.3497	11.6997
500	10.0747	14.6246	15.2746	12.0247	12.3497	10.7247
510	10.0747	14.6246	15.2746	12.0247	12.3497	10.3997
520	10.0747	14.6246	15.2746	12.3497	12.3497	10.0747
530	10.0747	14.9496	14.6246	12.3497	12.3497	9.74976
540	10.3997	14.9496	15.2746	11.6997	12.0247	10.7247
550	10.3997	14.9496	15.2746	12.0247	12.3497	9.42476
560	10.3997	14.9496	14.2996	12.0247	12.3497	10.7247
570	10.3997	14.9496	13.9747	12.0247	12.3497	9.74976
580	10.3997	14.9496	13.9747	12.3497	12.3497	10.7247
590	10.7247	14.9496	13.9747	12.3497	12.3497	9.42476
600	10.7247	14.6246	14.2996	12.3497	12.3497	8.77478
610	11.0497	14.9496	14.6246	12.0247	12.3497	9.42476
620	10.7247	15.2746	13.9747	11.6997	12.3497	9.42476
630	11.0497	14.9496	13.6497	11.6997	12.0247	9.42476
640	10.7247	15.2746	13.3247	12.0247	12.3497	9.74976
650	10.7247	14.6246	13.3247	11.6997	12.0247	10.0747
660	11.0497	15.2746	13.3247	12.3497	12.3497	9.09977
670	11.0497	14.9496	13.3247	11.6997	12.3497	9.42476
680	10.7247	14.9496	13.3247	12.3497	12.3497	9.74976
690	10.7247	14.9496	13.3247	12.0247	12.3497	9.42476
700	10.7247	14.9496	13.3247	12.3497	12.3497	9.74976
710	10.7247	14.9496	13.6497	12.0247	12.3497	9.42476
720	10.7247	14.9496	13.6497	12.0247	12.3497	10.0747
730	10.7247	14.6246	13.3247	11.6997	12.3497	10.0747
740	11.0497	14.9496	13.6497	12.3497	12.6747	9.74976
750	11.0497	15.2746	12.9997	12.0247	12.3497	9.42476
760	11.0497	15.2746	13.6497	12.3497	12.6747	9.42476
770	11.0497	15.2746	13.9747	12.3497	12.6747	9.09977
780	11.3747	14.9496	13.9747	12.3497	12.6747	9.42476
790	11.0497	14.9496	13.3247	12.3497	12.6747	9.09977
800	11.3747	14.9496	13.9747	12.3497	12.6747	9.09977
810	11.0497	14.9496	14.2996	12.6747	12.6747	9.74976
820	11.3747	14.9496	12.9997	12.3497	12.6747	9.74976
830	11.3747	15.2746	14.2996	12.6747	12.3497	9.42476
840	11.3747	15.2746	14.2996	12.3497	12.6747	10.0747
850	11.3747	14.9496	13.9747	12.6747	12.6747	9.42476
860	11.3747	15.2746	14.2996	12.3497	12.9997	10.3997
870	11.0497	14.9496	14.6246	12.6747	12.6747	9.42476
880	11.3747	15.2746	13.9747	12.3497	12.6747	9.42476
890	11.3747	15.5996	14.2996	12.6747	12.6747	9.74976
900	11.3747	15.2746	14.2996	12.3497	12.3497	9.74976
910	11.3747	14.9496	14.2996	12.3497	12.6747	9.42476
920	11.0497	15.2746	13.6497	12.0247	12.6747	9.42476
930	11.0497	14.9496	13.9747	11.6997	12.6747	9.42476
940	11.3747	14.9496	14.2996	12.0247	12.3497	9.42476
950	11.3747	14.9496	14.2996	11.6997	12.3497	9.09977
960	11.0497	14.9496	13.9747	12.3497	12.3497	9.42476
970	11.3747	14.9496	13.9747	12.3497	12.3497	9.09977
980	11.6997	15.2746	13.3247	12.3497	12.0247	8.77478
990	11.3747	15.5996	13.9747	12.3497	12.3497	8.77478
1000	11.3747	15.2746	13.9747	12.3497	12.0247	8.77478
1010	11.0497	15.5996	13.6497	12.0247	12.3497	9.09977
1020	11.3747	15.2746	13.3247	12.3497	12.3497	9.09977
1030	11.6997	15.2746	14.2996	12.6747	12.6747	8.77478
1040	11.6997	15.2746	13.9747	11.3747	12.3497	8.44979
1050	11.6997	15.5996	13.9747	11.6997	12.6747	8.44979
1060	11.3747	15.2746	13.9747	11.6997	12.3497	9.09977
1070	11.3747	15.2746	13.9747	11.3747	12.3497	8.77478
1080	11.6997	15.2746	13.9747	11.3747	12.0247	9.09977
1090	11.6997	15.2746	14.2996	11.6997	12.3497	9.09977
1100	11.3747	15.5996	13.6497	11.6997	12.3497	9.09977
1110	11.6997	15.2746	13.6497	12.0247	12.3497	9.09977
1120	11.6997	14.9496	13.9747	12.3497	12.0247	9.09977
1130	11.6997	15.2746	14.2996	11.6997	12.3497	9.09977
1140	11.6997	15.2746	14.2996	12.0247	12.0247	9.09977
1150	11.6997	15.2746	15.2746	12.3497	12.3497	9.09977
1160	11.6997	15.2746	14.6246	12.0247	12.3497	9.42476
1170	11.6997	14.9496	14.9496	12.3497	12.3497	9.42476
1180	11.6997	14.9496	14.9496	11.6997	12.0247	9.09977
1190	11.3747	14.9496	14.6246	11.6997	11.6997	9.74976
1200	11.6997	15.5996	14.6246	12.3497	11.3747	9.09977
1210	11.6997	14.9496	14.2996	12.3497	11.0497	9.09977
1220	11.6997	14.9496	14.9496	12.0247	11.0497	9.42476
1230	11.6997	14.9496	14.9496	12.0247	10.7247	9.09977
1240	11.6997	15.2746	14.9496	12.0247	10.7247	8.77478
1250	11.3747	15.2746	14.9496	12.0247	11.0497	9.42476
1260	11.3747	15.2746	14.9496	12.0247	10.7247	8.77478
1270	11.6997	15.2746	14.9496	12.0247	11.3747	9.09977
1280	11.3747	15.2746	14.9496	12.3497	11.3747	9.42476
1290	11.6997	15.5996	14.9496	12.3497	11.3747	9.74976
1300	11.6997	14.9496	14.9496	12.9997	11.0497	8.77478
1310	11.3747	14.9496	15.2746	12.3497	11.3747	9.42476
1320	11.6997	14.9496	14.6246	12.6747	11.3747	9.09977
1330	11.3747	15.2746	15.2746	12.9997	11.3747	9.09977
1340	11.3747	14.9496	15.2746	12.3497	11.0497	8.77478
1350	11.6997	15.2746	15.2746	12.3497	11.0497	9.42476
1360	11.3747	15.5996	15.2746	12.3497	11.0497	9.74976
1370	11.3747	15.2746	14.9496	12.3497	11.3747	9.42476
1380	11.3747	15.2746	14.6246	12.0247	11.0497	8.77478
1390	11.3747	15.2746	14.9496	12.3497	11.3747	9.42476
1400	11.3747	15.2746	14.6246	12.3497	11.3747	9.74976
1410	11.3747	15.2746	14.9496	12.0247	11.3747	9.42476
1420	11.3747	14.9496	14.2996	12.0247	11.6997	8.77478
1430	11.3747	15.2746	14.2996	12.0247	11.6997	9.42476
1440	11.6997	14.9496	14.6246	11.6997	11.3747	9.09977
1450	11.6997	14.9496	14.9496	12.0247	11.0497	9.09977
1460	11.6997	14.9496	14.6246	11.3747	11.3747	9.09977
1470	11.6997	14.9496	14.6246	11.6997	11.6997	9.42476
1480	11.6997	14.9496	14.2996	11.6997	11.6997	9.42476
1490	11.6997	14.9496	14.2996	11.6997	12.0247	9.09977
1500	11.6997	14.9496	14.6246	12.0247	12.0247	9.74976
1510	11.3747	14.9496	14.6246	11.3747	11.6997	9.74976
1520	11.6997	14.6246	14.6246	12.3497	11.6997	9.42476
1530	11.3747	14.9496	14.6246	11.6997	11.0497	9.42476
1540	11.6997	14.9496	14.6246	12.3497	11.3747	9.42476
1550	11.6997	15.2746	14.2996	11.6997	11.3747	9.74976
1560	11.6997	14.9496	14.9496	12.0247	11.0497	9.74976
1570	11.0497	14.9496	14.9496	11.6997	11.3747	10.0747
1580	11.3747	14.9496	14.6246	11.6997	11.3747	10.0747
1590	11.3747	14.9496	14.9496	12.3497	11.3747	9.74976
1600	11.0497	15.2746	14.9496	12.3497	11.6997	10.0747
1610	11.3747	15.2746	14.9496	11.3747	11.3747	10.0747
1620	11.3747	14.9496	14.6246	12.0247	11.3747	9.74976
1630	11.6997	14.9496	14.6246	12.0247	12.0247	10.0747
1640	11.0497	14.9496	14.6246	12.0247	11.6997	9.74976
1650	11.6997	14.9496	14.6246	12.3497	11.6997	9.74976
1660	11.3747	14.9496	14.2996	12.0247	11.6997	9.74976
1670	11.0497	14.9496	14.6246	12.6747	11.6997	9.74976
1680	11.0497	15.2746	14.6246	12.0247	11.6997	9.74976
1690	11.6997	14.9496	13.9747	12.0247	11.3747	10.0747
1700	11.0497	15.2746	14.2996	12.6747	11.3747	10.0747
1710	11.3747	14.9496	14.6246	11.6997	11.3747	10.0747
1720	11.0497	14.9496	14.2996	12.3497	11.3747	10.0747
1730	11.3747	14.9496	14.2996	12.3497	11.6997	10.0747
1740	11.6997	14.9496	14.2996	12.3497	11.3747	10.0747
1750	11.6997	14.9496	13.9747	12.6747	11.3747	10.0747
1760	11.6997	14.9496	14.2996	12.6747	11.3747	10.0747
1770	11.6997	15.2746	14.6246	12.9997	11.3747	10.0747
1780	11.6997	14.9496	13.9747	12.9997	11.3747	10.0747
1790	11.3747	14.9496	14.2996	12.6747	11.6997	10.0747

## Sheet: Sulprostone
Stimulation
Time	EBBV056	EBBV064	EBBV065	EBBV068	EBBV069	EBBV072	EBBV073	EBBV170
-300	17.875	19.5	26	24.05	12.675	20.15	25.35	19.175
-290	17.875	20.15	26.325	24.05	13	20.15	25.35	19.5
-280	18.2	20.15	26	24.375	12.675	20.15	25.35	19.175
-270	17.875	19.825	25.675	24.05	12.675	20.15	25.35	19.175
-260	18.2	19.825	26	24.05	13	20.15	25.025	19.175
-250	17.875	20.15	26	24.05	12.675	19.825	25.025	18.85
-240	17.875	20.15	26.325	24.05	12.675	20.15	25.35	19.175
-230	17.875	19.825	26	24.05	12.675	20.15	25.35	19.175
-220	17.875	20.15	26	24.05	12.675	19.825	25.025	19.175
-210	17.875	20.15	26	24.375	12.675	20.15	25.025	19.175
-200	17.875	19.825	26	24.05	12.675	19.825	24.7	19.175
-190	17.55	19.825	26	24.375	12.675	19.825	25.35	18.85
-180	17.225	20.475	26	24.05	12.675	20.15	25.025	19.175
-170	17.875	19.825	26	24.05	12.675	19.825	24.7	18.85
-160	17.55	20.15	26.325	24.375	12.675	20.15	25.025	19.5
-150	17.55	20.15	26.325	24.05	13	19.825	24.7	19.175
-140	17.875	19.825	26.325	24.375	12.675	20.15	25.025	18.85
-130	17.55	20.475	26.325	24.375	12.675	20.15	24.7	18.85
-120	17.875	20.15	26	24.375	13	20.15	25.35	19.175
-110	17.55	20.475	26	24.375	13	20.15	25.025	19.5
-100	17.875	19.825	26	24.375	13	20.15	25.35	19.5
-90	17.55	20.15	26.325	24.375	13	20.15	25.025	19.5
-80	17.55	20.15	26.325	24.05	13	20.15	25.025	19.5
-70	17.875	20.15	26.325	24.375	13	19.825	25.025	19.175
-60	17.875	20.475	26	24.375	13	20.15	25.025	19.5
-50	17.875	20.15	26.325	24.375	12.675	20.475	24.375	19.175
-40	17.55	20.475	26	24.375	12.675	20.15	25.025	19.175
-30	17.875	20.475	26.325	24.375	12.675	20.15	24.375	19.5
-20	17.875	20.15	26.325	24.05	13	19.825	25.025	19.175
-10	17.55	20.8	26	24.375	12.675	20.15	25.025	19.5
0	17.55	20.15	26.325	24.375	13	20.15	25.35	19.5
10	17.55	20.15	26.325	24.375	13	20.15	24.7	19.175
20	17.55	20.475	26.325	24.375	13	19.825	25.025	19.175
30	17.875	20.15	26.325	24.375	13	20.15	25.025	19.5
40	17.875	20.15	26.325	24.05	13	20.15	24.375	19.5
50	17.875	20.8	26.65	24.375	13	20.15	25.025	19.5
60	17.55	20.475	26.65	24.375	13	19.825	24.375	19.5
70	17.875	19.825	26.325	24.05	13	20.15	25.025	19.5
80	17.875	20.8	26.65	24.375	13	20.15	25.025	19.5
90	17.225	19.825	25.35	24.375	12.675	19.825	25.025	19.5
100	17.55	20.475	25.025	24.375	13	20.15	24.7	19.5
110	17.225	19.825	24.7	24.375	12.675	20.15	25.025	19.5
120	17.225	18.525	25.025	24.375	12.35	20.15	24.375	19.5
130	16.9	18.85	24.7	24.05	11.7	20.15	24.05	19.175
140	16.575	18.2	24.375	24.375	12.025	20.15	24.375	19.5
150	16.575	18.85	24.375	24.375	11.375	19.5	24.05	19.5
160	16.25	17.225	24.05	24.05	11.375	19.825	23.725	19.175
170	16.25	18.2	24.375	24.7	11.375	18.85	23.725	19.175
180	16.25	17.875	24.375	24.7	11.375	19.175	24.05	19.5
190	16.25	17.55	24.05	24.375	11.375	18.85	24.05	19.175
200	15.925	17.55	24.375	24.7	11.375	19.175	24.05	18.85
210	15.925	17.875	24.375	24.7	11.375	18.85	24.05	18.85
220	15.6	17.55	24.05	24.7	11.7	19.175	24.05	19.175
230	15.6	17.225	24.05	24.375	11.375	19.825	24.05	18.525
240	15.275	17.225	24.05	24.375	11.375	19.5	23.725	18.85
250	15.6	17.225	24.375	24.375	11.375	19.175	23.725	18.85
260	15.6	16.575	24.05	24.375	11.7	19.5	23.725	18.525
270	15.6	16.575	23.725	24.375	11.375	19.175	23.725	18.2
280	15.275	15.925	24.05	24.05	11.7	19.175	23.725	18.2
290	15.275	16.25	24.375	24.05	11.7	18.85	23.4	17.875
300	15.6	15.925	23.725	23.4	11.7	19.5	23.4	17.875
310	15.6	16.25	24.05	22.75	11.7	19.5	23.725	17.875
320	15.6	16.25	24.375	22.75	11.375	19.175	23.4	17.55
330	15.275	16.25	24.375	23.075	11.375	19.175	23.075	18.2
340	15.6	16.25	24.05	22.425	11.7	19.175	23.075	17.875
350	14.95	15.925	24.05	21.775	11.7	18.525	23.4	17.55
360	15.275	15.925	23.725	21.775	11.375	18.525	23.4	17.875
370	15.275	16.25	24.375	21.45	11.375	18.85	23.075	17.875
380	15.275	16.575	24.05	21.45	11.375	18.525	23.075	17.55
390	15.275	15.925	24.05	21.45	11.375	18.85	23.075	17.225
400	15.6	16.25	24.05	21.125	11.375	18.85	23.4	17.225
410	14.95	15.925	24.05	21.125	11.7	18.525	23.4	17.55
420	14.95	15.6	24.375	21.125	11.7	18.85	23.4	17.55
430	14.95	16.25	24.05	21.45	11.7	18.525	23.075	17.55
440	14.95	16.25	24.05	21.125	11.7	18.525	23.075	18.2
450	15.275	15.275	24.05	21.45	11.7	18.525	23.075	17.875
460	14.625	15.6	24.375	21.125	11.7	18.2	22.75	18.2
470	14.95	14.95	24.05	21.45	11.7	17.875	23.075	17.55
480	14.95	15.6	24.375	21.775	11.7	18.2	23.4	17.55
490	14.625	15.925	24.05	21.775	11.7	18.2	23.075	17.55
500	14.625	15.6	24.05	22.1	12.025	18.2	22.75	17.875
510	14.625	16.575	24.375	22.1	12.025	18.2	23.075	17.875
520	14.3	16.25	24.05	22.1	12.025	18.2	23.075	17.875
530	14.3	15.6	24.375	22.75	12.025	18.525	22.75	18.2
540	14.95	16.25	24.7	22.1	12.025	18.2	23.4	17.875
550	14.625	15.925	24.375	22.75	12.025	17.55	23.075	18.2
560	14.3	15.925	25.025	22.1	11.7	17.875	23.075	18.2
570	14.95	15.6	24.7	22.75	12.025	17.875	23.725	18.2
580	14.95	15.925	24.375	22.75	12.025	18.2	23.075	17.875
590	14.95	15.275	24.375	22.425	12.025	18.525	23.075	17.875
600	14.3	16.25	24.7	22.75	12.025	17.875	23.075	18.2
610	14.625	16.575	24.375	23.075	12.025	18.525	23.4	17.875
620	14.625	15.925	24.05	22.75	12.025	17.875	23.725	18.2
630	14.625	16.25	25.025	22.75	12.025	18.2	23.075	17.875
640	14.3	15.925	25.025	23.075	12.025	17.875	23.4	17.55
650	14.95	15.925	24.375	23.075	12.025	17.875	23.4	17.875
660	14.625	15.925	24.375	23.075	12.35	17.875	23.075	17.55
670	14.95	16.25	24.7	23.075	12.35	18.2	23.4	18.2
680	14.95	16.25	24.375	23.075	12.025	18.525	23.075	18.2
690	14.625	16.575	24.7	23.075	12.025	17.875	22.75	18.2
700	14.95	16.25	24.05	23.075	12.025	18.2	22.75	18.2
710	14.95	16.25	24.7	23.725	12.35	18.2	23.4	18.2
720	15.275	16.25	24.7	23.4	12.025	17.55	23.4	18.2
730	14.95	16.575	24.7	23.725	12.025	18.525	23.725	17.875
740	14.3	16.25	24.7	23.4	12.35	17.875	23.075	17.55
750	14.95	16.25	24.05	23.4	12.025	17.875	23.4	18.2
760	14.625	16.9	24.7	23.4	12.025	18.525	23.4	17.875
770	14.625	16.9	25.025	23.4	12.35	17.875	23.4	17.55
780	14.3	16.25	25.025	23.4	12.025	18.2	23.4	18.2
790	14.95	16.9	24.7	23.4	12.35	18.2	23.4	18.2
800	14.3	16.25	25.025	23.725	12.35	18.2	23.725	17.875
810	14.95	15.925	25.025	23.4	12.35	18.2	23.4	18.2
820	14.95	15.925	24.7	23.725	12.025	17.875	23.725	18.2
830	14.95	16.25	24.375	23.725	12.35	18.2	23.725	18.525
840	14.625	15.275	25.025	23.4	12.35	18.2	23.4	18.525
850	14.625	16.9	24.7	23.4	12.35	18.525	23.4	17.875
860	15.275	16.575	24.7	23.4	12.025	18.525	23.725	18.2
870	14.95	15.6	25.025	23.725	12.35	18.525	24.05	18.525
880	14.3	16.25	25.35	23.725	12.35	18.2	23.725	18.2
890	14.625	15.925	25.35	24.05	12.35	18.2	23.725	17.875
900	14.625	15.6	25.35	23.4	12.025	18.525	23.4	17.875
910	14.625	15.925	25.35	23.4	12.675	18.525	23.4	18.2
920	14.625	15.925	25.025	23.4	12.35	18.525	23.725	17.55
930	14.3	16.25	25.025	23.4	12.35	18.85	23.4	17.875
940	14.625	15.275	25.35	24.05	12.025	18.525	23.725	18.2
950	14.95	15.275	25.025	24.05	12.35	18.2	24.05	18.2
960	14.625	16.25	25.025	23.725	12.35	18.2	24.05	18.2
970	14.625	15.925	25.025	23.4	12.35	18.85	23.4	18.2
980	14.95	15.925	24.7	24.05	12.675	18.2	23.4	18.2
990	14.95	15.925	25.025	24.05	12.35	18.2	23.725	18.2
1000	14.625	16.25	25.35	23.725	12.35	18.85	23.4	17.55
1010	14.625	15.925	25.35	24.05	12.35	18.525	23.4	17.875
1020	14.625	15.925	24.7	24.05	12.35	18.85	23.725	17.55
1030	14.95	16.25	25.025	24.375	12.35	18.2	24.05	17.875
1040	14.95	16.25	25.025	23.725	12.35	18.85	23.725	17.55
1050	14.625	16.575	25.35	23.725	12.35	18.85	23.725	17.875
1060	14.625	15.925	25.025	24.375	12.35	18.525	23.725	17.875
1070	15.275	16.575	25.35	24.05	12.35	18.525	23.4	17.225
1080	14.95	15.6	25.675	24.05	12.35	18.85	23.4	17.225
1090	14.95	16.575	25.025	24.375	12.35	18.525	23.075	17.55
1100	14.625	15.925	25.35	24.375	12.35	18.525	23.725	17.875
1110	14.95	15.925	25.35	24.05	12.35	18.2	24.05	17.55
1120	14.95	16.25	25.35	24.05	12.35	18.2	23.4	17.55
1130	14.3	16.575	25.35	24.375	12.35	18.525	24.05	17.875
1140	14.625	16.575	25.35	24.05	12.35	18.2	23.725	17.875
1150	14.625	16.9	25.675	24.05	12.35	18.525	23.4	17.875
1160	14.95	16.575	25.675	24.05	12.025	18.525	23.725	17.875
1170	14.625	15.925	25.35	24.05	12.35	18.525	24.05	17.875
1180	14.625	17.225	25.025	23.725	12.35	18.525	24.05	17.55
1190	14.625	16.9	25.025	24.05	12.35	18.525	24.05	17.875
1200	14.3	16.575	25.35	23.725	12.35	18.2	23.725	17.225
1210	14.95	16.575	25.025	24.05	12.35	17.875	24.05	17.55
1220	14.95	16.575	25.35	24.05	12.35	18.2	23.725	17.875
1230	14.625	16.575	25.35	24.375	12.35	18.2	23.725	18.2
1240	14.95	16.575	25.675	24.7	12.675	18.85	23.725	17.55
1250	14.625	16.25	25.675	24.05	12.35	18.525	23.725	17.55
1260	14.3	16.575	25.35	24.375	12.35	18.525	24.375	17.225
1270	14.625	16.575	26.325	23.725	12.025	18.2	24.375	17.55
1280	14.625	16.25	25.675	23.725	12.025	18.2	23.725	17.55
1290	14.625	16.575	25.35	24.375	12.35	18.85	23.725	17.875
1300	14.3	16.575	25.675	24.7	12.025	18.2	24.05	17.225
1310	14.625	16.25	26	24.375	12.35	18.525	24.05	17.55
1320	14.625	16.9	25.675	24.7	12.35	18.85	24.05	17.55
1330	14.625	16.575	25.025	24.7	12.35	18.525	24.05	17.55
1340	14.625	17.225	25.675	24.375	12.025	18.85	24.375	17.875
1350	14.95	17.55	25.35	24.375	12.35	19.175	24.05	17.225
1360	14.95	17.55	26.325	24.7	12.025	18.2	24.05	17.55
1370	14.625	17.55	25.35	24.375	12.025	18.525	24.05	17.875
1380	14.625	17.225	25.675	24.375	12.35	18.2	24.05	17.55
1390	14.625	17.225	25.35	24.05	12.025	18.2	24.375	16.9
1400	14.625	16.9	26	24.375	12.025	18.2	23.075	17.225
1410	14.625	17.225	26	24.375	12.35	18.525	24.375	17.225
1420	14.95	17.225	26.325	24.7	12.025	18.2	23.725	17.55
1430	14.95	16.575	25.675	23.725	12.025	18.85	24.375	17.225
1440	14.95	17.225	26	25.025	12.025	18.2	23.4	17.55
1450	14.625	16.9	26	24.375	12.025	18.525	23.725	17.875
1460	14.95	16.25	25.35	24.7	12.35	18.525	23.725	17.225
1470	14.95	16.575	25.675	24.375	12.35	18.525	23.4	17.55
1480	14.3	16.575	26.325	24.375	12.025	18.85	24.05	16.575
1490	14.625	16.575	25.35	25.025	12.35	18.525	24.05	16.9
1500	14.625	16.9	26	24.375	12.025	18.85	23.725	17.55
1510	14.625	16.575	26.325	24.375	12.35	19.175	23.725	17.55
1520	14.3	16.9	25.675	25.025	12.35	18.525	24.05	17.55
1530	14.3	16.9	25.675	25.025	12.35	19.175	24.05	17.55
1540	14.625	17.225	25.675	24.375	12.025	19.175	24.375	17.225
1550	14.625	17.225	25.675	24.7	12.025	18.2	24.05	17.225
1560	14.3	17.875	25.35	24.7	12.025	19.175	23.725	16.9
1570	14.3	17.55	26	24.7	12.025	19.175	24.375	16.9
1580	14.625	16.9	25.675	24.05	12.025	18.85	24.375	16.9
1590	14.3	16.9	26	24.7	12.35	18.85	24.05	16.9
1600	14.3	16.9	26	24.7	12.025	18.525	24.05	16.9
1610	14.625	16.9	25.675	25.025	12.35	18.85	23.725	16.9
1620	14.625	17.225	25.675	24.7	12.675	18.85	24.05	17.225
1630	14.3	17.225	25.675	24.7	12.35	18.525	24.05	17.225
1640	14.625	17.225	25.675	24.7	12.025	18.525	23.4	16.9
1650	14.625	17.225	26.325	24.7	12.675	18.2	24.05	16.575
1660	14.625	18.2	26	24.375	12.025	18.85	24.375	16.9
1670	14.625	17.55	26	24.7	12.35	18.525	24.375	16.575
1680	14.625	18.2	25.35	24.7	12.35	18.525	24.05	16.9
1690	14.3	17.225	25.675	24.7	12.35	18.2	24.05	17.225
1700	14.625	17.225	26	24.7	12.025	18.525	24.05	16.575
1710	14.625	17.225	26	24.7	12.35	18.85	24.7	17.225
1720	14.625	17.225	25.675	24.7	12.35	18.85	24.375	16.9
1730	14.3	17.55	26	24.7	12.025	18.525	24.375	16.9
1740	14.3	17.55	25.675	25.025	12.35	18.525	24.375	17.225
1750	14.625	17.875	25.35	24.7	12.025	18.525	24.375	16.9
1760	14.625	17.875	26	25.025	12.35	18.85	24.05	16.9
1770	14.625	17.55	25.675	24.7	12.35	18.525	24.7	16.9
1780	14.625	17.875	26.325	25.025	12.35	18.85	24.375	16.9
1790	14.3	17.875	26.325	24.375	12.35	18.2	24.05	16.9

## Sheet: 10 µM + TTX
Stimulation
Time	BGBV-453	BGBV-454	BGBV-456	BGBV-473	BGBV-474
-300	20.4745	15.2746	16.5746	10.3997	14.2996
-290	20.1495	15.5996	16.8996	10.7247	14.9496
-280	19.8245	15.9246	16.8996	10.7247	14.2996
-270	20.4745	15.9246	16.2496	10.0747	14.2996
-260	20.4745	15.9246	16.5746	10.0747	14.2996
-250	20.4745	15.9246	16.5746	10.7247	14.9496
-240	20.1495	15.5996	16.5746	10.3997	13.9747
-230	21.4495	15.9246	16.2496	10.3997	14.6246
-220	20.1495	15.5996	17.2246	10.3997	14.9496
-210	20.7995	15.5996	17.2246	10.3997	14.6246
-200	20.7995	15.5996	16.5746	10.3997	14.2996
-190	20.4745	15.2746	15.5996	10.3997	14.6246
-180	20.1495	15.5996	16.2496	10.7247	13.9747
-170	21.1245	15.2746	17.8746	10.7247	13.9747
-160	20.4745	15.5996	16.5746	10.3997	14.6246
-150	20.7995	15.2746	17.2246	10.7247	14.2996
-140	20.4745	15.5996	17.2246	10.0747	14.2996
-130	20.7995	15.9246	16.8996	10.3997	14.9496
-120	20.1495	15.5996	16.8996	10.3997	14.6246
-110	20.7995	15.5996	16.8996	10.3997	14.2996
-100	20.1495	15.5996	16.8996	10.3997	13.9747
-90	20.7995	15.5996	17.2246	11.0497	13.9747
-80	20.4745	15.5996	16.8996	10.7247	14.6246
-70	20.7995	15.9246	17.2246	10.3997	14.6246
-60	20.1495	15.5996	16.5746	10.3997	14.2996
-50	19.8245	15.9246	17.5496	10.3997	13.9747
-40	19.8245	15.5996	17.8746	10.3997	14.2996
-30	20.4745	15.5996	17.2246	10.3997	14.2996
-20	19.8245	15.9246	17.8746	10.3997	13.9747
-10	20.1495	15.5996	18.1995	10.7247	13.9747
0	20.1495	15.9246	17.2246	10.3997	13.9747
10	19.8245	15.5996	17.5496	10.7247	13.9747
20	20.4745	15.9246	17.5496	10.0747	13.9747
30	20.1495	15.9246	17.8746	10.0747	14.2996
40	19.8245	15.5996	17.5496	10.7247	13.9747
50	19.8245	15.5996	17.5496	10.3997	13.9747
60	19.8245	15.5996	16.8996	11.0497	14.2996
70	20.1495	16.2496	17.2246	10.3997	14.6246
80	19.8245	15.5996	17.5496	9.74976	13.9747
90	19.8245	14.9496	17.5496	10.3997	14.2996
100	19.8245	15.2746	17.8746	10.3997	14.2996
110	20.4745	15.5996	16.8996	10.0747	14.2996
120	19.8245	15.5996	17.2246	10.0747	13.9747
130	20.1495	15.9246	17.2246	10.0747	13.6497
140	19.8245	15.5996	16.8996	10.7247	13.9747
150	20.1495	15.9246	16.8996	10.0747	13.6497
160	19.8245	15.2746	17.5496	10.3997	13.9747
170	20.1495	15.5996	16.2496	10.7247	13.9747
180	20.1495	15.9246	17.5496	10.3997	14.2996
190	20.1495	15.5996	16.8996	10.3997	13.6497
200	19.8245	15.2746	17.2246	10.3997	13.6497
210	20.1495	15.5996	16.8996	10.3997	13.6497
220	20.1495	15.5996	17.8746	10.3997	13.6497
230	20.1495	15.9246	17.2246	10.7247	13.6497
240	19.8245	15.5996	17.2246	11.3747	13.9747
250	19.4995	15.2746	16.2496	10.7247	13.9747
260	19.1745	15.9246	16.8996	10.0747	13.6497
270	17.8746	15.5996	15.9246	10.3997	13.3247
280	17.5496	15.5996	17.2246	10.0747	12.9997
290	16.8996	15.2746	16.8996	10.7247	12.6747
300	16.8996	15.9246	16.5746	10.3997	12.3497
310	17.2246	15.9246	16.8996	10.0747	12.6747
320	16.8996	15.5996	16.8996	10.7247	12.3497
330	16.5746	15.5996	16.8996	10.0747	12.6747
340	15.5996	15.9246	16.8996	10.3997	11.6997
350	15.2746	15.9246	15.5996	10.7247	12.3497
360	15.2746	15.9246	15.5996	11.0497	12.3497
370	15.2746	15.9246	16.2496	10.7247	11.6997
380	14.6246	15.9246	15.2746	9.74976	11.6997
390	14.6246	15.2746	15.2746	10.0747	11.3747
400	14.6246	15.2746	14.6246	10.0747	12.0247
410	14.2996	14.9496	14.2996	9.74976	11.6997
420	14.2996	15.2746	13.3247	10.7247	12.0247
430	14.2996	14.6246	12.6747	10.0747	11.3747
440	14.2996	14.6246	12.3497	9.74976	11.6997
450	13.6497	14.6246	12.6747	9.42476	12.0247
460	13.6497	13.9747	12.6747	10.7247	11.3747
470	13.6497	12.9997	12.3497	9.74976	11.6997
480	13.9747	13.3247	12.6747	9.42476	11.6997
490	13.6497	13.6497	12.0247	9.09977	11.6997
500	13.6497	13.3247	12.0247	9.09977	11.3747
510	13.3247	13.3247	11.6997	8.77478	11.6997
520	13.9747	12.9997	11.3747	9.09977	11.6997
530	13.9747	12.9997	11.0497	9.42476	12.3497
540	13.6497	13.3247	11.6997	9.42476	11.6997
550	14.2996	13.3247	11.0497	10.0747	11.6997
560	14.2996	13.3247	11.0497	9.74976	12.0247
570	13.9747	12.9997	10.7247	9.74976	12.0247
580	14.2996	13.3247	10.7247	8.77478	11.3747
590	13.9747	12.6747	11.3747	9.42476	11.6997
600	14.2996	12.6747	10.3997	9.09977	12.0247
610	14.2996	12.0247	11.0497	9.09977	12.0247
620	14.6246	12.6747	11.3747	9.09977	12.3497
630	13.9747	12.0247	11.3747	9.74976	11.6997
640	14.2996	12.6747	11.3747	9.74976	11.6997
650	14.6246	12.9997	10.7247	8.77478	12.0247
660	13.6497	12.6747	9.74976	9.09977	11.3747
670	13.6497	12.0247	10.0747	9.09977	12.0247
680	13.9747	12.6747	9.74976	9.42476	11.6997
690	13.9747	12.6747	10.0747	9.42476	11.6997
700	13.9747	12.6747	10.7247	9.42476	11.6997
710	13.6497	12.9997	9.74976	9.42476	12.3497
720	13.9747	13.3247	9.74976	8.77478	12.3497
730	13.6497	12.9997	9.42476	9.09977	12.0247
740	13.9747	13.3247	10.0747	9.42476	11.6997
750	13.6497	13.9747	10.0747	9.09977	11.6997
760	14.2996	13.6497	10.3997	8.77478	11.6997
770	14.2996	13.9747	10.0747	8.77478	11.6997
780	13.6497	14.2996	9.09977	8.1248	11.3747
790	13.6497	14.6246	9.74976	8.77478	11.6997
800	14.2996	14.6246	9.74976	9.09977	11.6997
810	14.6246	14.2996	9.74976	9.42476	11.6997
820	14.2996	14.2996	9.74976	9.09977	11.6997
830	14.2996	14.2996	9.74976	8.44979	11.6997
840	14.6246	14.9496	10.3997	8.44979	12.3497
850	14.6246	14.6246	11.3747	9.09977	12.0247
860	13.9747	15.2746	9.74976	8.44979	11.6997
870	14.6246	14.9496	10.0747	8.44979	11.3747
880	14.2996	14.9496	10.0747	8.44979	11.3747
890	14.9496	14.9496	10.3997	8.44979	11.6997
900	14.6246	14.6246	9.42476	8.77478	11.6997
910	14.9496	14.6246	10.0747	8.77478	11.3747
920	14.9496	14.9496	9.74976	9.42476	11.3747
930	15.2746	15.5996	10.0747	8.77478	12.3497
940	15.2746	14.9496	10.7247	7.79981	11.3747
950	15.5996	14.9496	10.0747	8.1248	12.0247
960	14.9496	14.9496	10.0747	7.79981	12.0247
970	15.2746	15.2746	10.0747	7.79981	12.0247
980	14.9496	15.2746	10.7247	8.77478	11.6997
990	15.2746	14.9496	11.0497	8.77478	12.3497
1000	15.2746	15.2746	10.7247	8.1248	12.0247
1010	15.2746	15.2746	11.0497	8.77478	12.3497
1020	15.2746	15.5996	10.7247	8.44979	12.0247
1030	15.2746	15.2746	10.0747	8.1248	12.0247
1040	15.5996	14.9496	10.7247	9.09977	12.0247
1050	15.5996	14.9496	10.7247	8.44979	12.0247
1060	15.5996	14.6246	10.7247	8.44979	12.0247
1070	15.5996	14.2996	10.7247	8.1248	11.6997
1080	15.5996	15.2746	10.7247	9.09977	11.3747
1090	15.5996	15.2746	11.3747	8.44979	12.0247
1100	16.2496	15.2746	10.7247	9.09977	11.6997
1110	15.5996	14.9496	10.3997	7.79981	12.0247
1120	15.9246	14.9496	11.0497	8.1248	11.6997
1130	16.5746	14.9496	10.7247	7.14982	11.6997
1140	15.9246	14.9496	11.3747	8.1248	11.6997
1150	15.5996	15.2746	10.3997	7.79981	11.6997
1160	15.9246	15.2746	10.3997	8.1248	12.0247
1170	15.5996	14.9496	11.0497	8.1248	12.0247
1180	16.2496	15.5996	11.0497	8.44979	12.0247
1190	15.9246	15.5996	11.0497	8.1248	12.0247
1200	15.5996	14.9496	11.0497	8.1248	11.6997
1210	15.5996	14.6246	10.7247	8.44979	12.0247
1220	15.9246	14.9496	11.3747	7.79981	12.6747
1230	16.2496	14.9496	11.3747	8.1248	11.6997
1240	16.8996	14.9496	11.0497	7.79981	12.3497
1250	16.5746	14.9496	11.3747	7.47481	12.0247
1260	16.2496	14.6246	11.3747	7.79981	12.0247
1270	16.5746	14.6246	10.7247	8.1248	12.0247
1280	16.5746	14.9496	11.0497	8.1248	12.0247
1290	16.2496	14.9496	10.7247	8.77478	12.0247
1300	15.9246	15.2746	11.6997	7.79981	12.0247
1310	15.9246	14.9496	11.3747	8.77478	12.0247
1320	15.5996	15.5996	11.6997	8.1248	12.0247
1330	15.9246	14.9496	11.6997	8.1248	12.3497
1340	15.9246	14.6246	10.7247	7.79981	12.0247
1350	16.5746	14.6246	11.0497	8.1248	12.0247
1360	16.8996	14.9496	11.3747	8.77478	12.0247
1370	16.2496	15.2746	10.7247	8.44979	12.0247
1380	16.5746	15.2746	11.0497	8.1248	12.3497
1390	17.2246	14.9496	10.7247	8.77478	12.3497
1400	16.5746	14.9496	12.0247	8.44979	12.3497
1410	15.9246	15.2746	11.6997	8.44979	12.6747
1420	15.9246	15.2746	11.6997	8.44979	12.3497
1430	16.2496	15.2746	11.3747	8.77478	12.6747
1440	16.2496	15.2746	11.0497	8.44979	12.3497
1450	16.2496	15.2746	10.3997	7.79981	12.3497
1460	16.5746	14.9496	11.3747	8.44979	12.0247
1470	16.8996	14.9496	10.3997	8.77478	12.0247
1480	16.2496	14.6246	11.3747	8.44979	12.0247
1490	16.8996	15.5996	11.6997	8.77478	12.0247
1500	17.2246	15.2746	12.0247	8.1248	12.0247
1510	17.2246	15.2746	11.6997	8.1248	12.0247
1520	16.8996	15.2746	11.3747	7.79981	12.0247
1530	17.2246	15.2746	11.6997	7.47481	12.0247
1540	16.5746	15.2746	11.6997	7.79981	12.0247
1550	16.8996	14.9496	11.0497	7.79981	12.6747
1560	17.2246	15.2746	12.3497	6.82483	12.0247
1570	17.5496	15.5996	11.6997	8.44979	12.3497
1580	17.2246	15.2746	12.0247	7.79981	12.0247
1590	16.5746	15.2746	11.6997	8.1248	12.3497
1600	16.8996	15.2746	12.9997	8.44979	12.3497
1610	17.2246	15.5996	11.6997	7.79981	12.6747
1620	17.5496	15.2746	11.3747	7.14982	12.0247
1630	16.8996	15.5996	12.3497	7.79981	12.3497
1640	16.8996	15.5996	11.6997	8.1248	12.3497
1650	17.5496	15.9246	12.9997	7.14982	12.3497
1660	17.5496	14.9496	12.3497	7.47481	12.0247
1670	17.2246	15.2746	11.6997	7.79981	12.0247
1680	17.2246	14.9496	11.6997	8.77478	12.0247
1690	17.2246	15.5996	11.3747	7.79981	12.3497
1700	16.5746	15.5996	11.6997	8.1248	12.3497
1710	17.8746	14.9496	11.3747	8.1248	12.3497
1720	17.8746	14.6246	11.0497	8.77478	12.3497
1730	17.5496	15.5996	11.3747	9.09977	12.3497
1740	17.8746	15.5996	11.6997	8.44979	12.0247
1750	17.2246	15.5996	12.0247	9.09977	12.3497
1760	17.5496	15.2746	10.7247	10.0747	12.0247
1770	17.5496	15.9246	11.3747	9.42476	12.3497
1780	17.5496	15.2746	11.6997	9.42476	12.0247
1790	17.5496	15.2746	10.3997	10.3997	12.0247
