# Supplementary material for: Elevated pyramidal cell firing orchestrates arteriolar vasoconstriction through COX-2-derived prostaglandin E2 signaling
Source: eLife. 2025 Apr 23;13:RP102424. doi: 10.7554/eLife.102424 (PMC12017770; doi:10.7554/eLife.102424)
Supplement: Figure 5—source data 1. [file elife-102424-fig5-data1.xlsx]

## Sheet: CTRL
Stimulation
Time	BGBV-075_0000	BGBV-106_0000	BGBV-117_0000	BGBV-134_0000	BGBV-253_0000	BGBV-333_0000	BGBV-334_0000	BGBV-355_0000	BGBV-407_0000	BGBV-417_0000
0	12.35	18.8499	21.0166	24.3744	16.5746			26.9743	24.0494	19.4995
1	12.5666	18.8499	21.2333	24.0494	16.5746	24.0494	21.1245	26.6493	24.3744	19.4995
2	12.7833	18.6333	21.2333	24.0494	16.5746	23.0744	21.1245	26.9743	24.0494	19.4995
3	12.7833	19.0666	21.2333	24.0494	16.2496	23.0744	21.1245	27.2993	24.0494	19.4995
4	12.7833	19.0666	21.2333	24.0494	16.2496	23.3994	21.1245	27.2993	24.3744	19.4995
5	12.7833	18.8499	21.4499	24.0494	16.2496	23.3994	21.1245	26.6493	24.3744	19.4995
6	12.5666	18.6333	21.2333	24.0494	16.2496	22.7494	21.7745	26.6493	24.0494	19.4995
7	12.7833	18.8499	21.4499	24.0494	16.5746	23.0744	21.4495	26.6493	24.3744	19.4995
8	12.5666	18.8499	21.2333	24.0494	16.2496	22.7494	21.1245	26.9743	24.0494	19.4995
9	12.5666	18.8499	21.4499	24.0494	15.9246	23.0744	21.4495	26.6493	24.0494	19.1745
10	12.7833	18.6333	21.2333	24.0494	16.2496	23.0744	21.4495	27.2993	24.3744	19.1745
11	12.35	18.8499	21.2333	24.0494	16.2496	23.3994	21.1245	26.6493	24.0494	19.4995
12	12.5666	18.8499	21.2333	24.0494	16.2496	23.0744	21.1245	26.9743	24.3744	19.1745
13	12.5666	19.0666	21.4499	24.0494	16.2496	23.0744	20.7995	26.9743	24.0494	19.1745
14	12.5666	18.8499	21.2333	24.0494	15.9246	23.0744	21.4495	26.6493	24.0494	19.4995
15	12.5666	19.0666	21.2333	24.0494	16.2496	22.7494	21.7745	26.6493	24.0494	19.4995
16	12.7833	18.8499	21.2333	23.7244	16.5746	23.0744	21.7745	26.6493	24.3744	19.1745
17	12.35	18.8499	21.2333	24.0494	16.5746	22.7494	21.4495	26.6493	23.7244	19.4995
18	12.5666	18.6333	21.2333	24.0494	16.5746	22.7494	21.1245	27.2993	23.3994	19.4995
19	12.5666	18.6333	21.2333	24.0494	16.5746	23.3994	21.4495	26.6493	24.0494	19.8245
20	12.7833	19.0666	21.4499	24.0494	16.5746	22.7494	22.0994	26.6493	23.7244	19.1745
21	12.5666	18.6333	21.2333	24.0494	15.9246	23.0744	21.4495	26.9743	24.0494	19.4995
22	12.35	18.6333	21.2333	24.0494	16.2496	23.3994	21.4495	26.9743	24.0494	19.4995
23	12.7833	18.8499	21.4499	24.0494	16.2496	23.0744	21.4495	26.3243	24.3744	19.4995
24	12.5666	18.8499	21.2333	24.0494	16.2496	22.7494	21.7745	27.2993	23.7244	19.4995
25	12.5666	18.6333	21.4499	24.0494	16.2496	23.0744	21.4495	27.2993	24.3744	19.4995
26	12.35	18.6333	21.4499	24.0494	16.5746	23.0744	21.4495	26.6493	24.0494	19.4995
27	12.7833	18.6333	21.2333	24.3744	16.2496	23.0744	21.1245	27.2993	23.7244	19.4995
28	12.35	18.6333	21.2333	24.0494	16.2496	23.0744	21.4495	26.6493	23.7244	19.4995
29	12.35	18.8499	21.4499	24.0494	15.9246	23.0744	21.4495	26.9743	24.0494	19.4995
30	12.7833	18.8499	21.2333	24.0494	16.2496	22.7494	21.1245	26.9743	24.0494	19.4995
31					16.2496			26.9743	23.7244	19.4995
32					15.9246			26.9743	23.7244	19.4995
33					16.2496			27.2993	23.7244	19.1745
34					16.2496			26.9743	23.7244	19.4995
35					16.2496			26.9743	24.3744	19.4995
36					16.5746			27.2993	23.7244	19.4995
37					16.5746			27.2993	23.7244	19.4995
38					16.8996			27.2993	23.7244	19.4995
39					16.5746			27.2993	23.7244	19.4995
40					16.8996			27.2993	24.0494	19.4995
41	12.7833	18.6333	21.2333	24.0494	16.5746	23.3994	21.7745	26.9743	24.0494	19.4995
42	12.35	18.8499	21.4499	24.0494	16.5746	22.7494	20.4745	26.9743	23.3994	19.8245
43	12.5666	18.8499	21.2333	24.0494	16.5746	22.7494	21.1245	26.9743	24.0494	19.1745
44	12.1333	18.8499	21.2333	24.0494	16.8996	22.7494	21.7745	26.6493	23.7244	19.8245
45	12.35	18.6333	21.2333	24.0494	16.8996	23.0744	21.4495	27.2993	23.7244	19.8245
46	12.5666	18.8499	21.2333	24.0494	16.8996	22.7494	20.7995	27.2993	23.7244	19.4995
47	12.5666	18.8499	21.2333	24.0494	16.5746	23.3994	21.4495	26.9743	23.7244	19.8245
48	12.7833	18.6333	21.2333	24.0494	16.5746	23.0744	21.1245	27.2993	23.7244	19.4995
49	12.5666	18.6333	21.2333	24.0494	16.8996	22.7494	20.7995	26.9743	23.7244	19.4995
50	12.5666	18.6333	21.2333	24.0494	16.5746	23.0744	21.1245	26.9743	24.0494	19.8245
51	12.35	18.6333	21.2333	24.0494	16.5746	23.3994	21.1245	27.2993	24.0494	19.8245
52	12.5666	18.6333	21.2333	24.0494	16.8996	22.7494	21.4495	27.2993	23.7244	19.8245
53	12.5666	18.6333	21.2333	24.0494	16.2496	23.0744	21.1245	27.2993	24.0494	19.8245
54	12.35	18.8499	21.2333	24.0494	16.5746	23.0744	21.1245	27.2993	23.7244	19.4995
55	12.5666	18.8499	21.2333	24.0494	16.5746	23.3994	21.4495	27.2993	23.7244	19.8245
56	12.5666	18.8499	21.2333	24.0494	16.5746	23.0744	21.1245	26.9743	23.7244	19.8245
57	12.5666	18.8499	21.2333	24.0494	16.5746	23.0744	21.4495	27.2993	23.7244	20.1495
58	12.35	18.8499	21.2333	24.0494	16.2496	23.3994	21.4495	27.2993	23.7244	19.8245
59	12.1333	18.8499	21.0166	24.0494	15.9246	23.3994	21.4495	26.9743	23.7244	19.4995
60	12.5666	18.8499	21.2333	24.0494	16.2496	23.7244	21.4495	26.6493	24.0494	19.4995
61	12.35	18.6333	21.0166	24.3744	15.9246	23.3994	21.1245	27.2993	23.7244	19.8245
62	12.35	18.8499	21.0166	24.0494	16.2496	23.0744	21.1245	26.9743	23.7244	18.8495
63	12.35	18.6333	21.2333	23.7244	16.2496	23.3994	21.4495	26.6493	24.0494	20.1495
64	12.35	18.8499	20.7999	24.0494	16.2496	23.3994	21.4495	26.9743	23.7244	19.4995
65	12.35	18.8499	21.2333	23.7244	16.2496	23.3994	21.1245	26.6493	24.0494	19.4995
66	12.1333	18.8499	21.0166	23.7244	16.2496	23.3994	21.1245	26.6493	24.0494	19.4995
67	11.9166	18.8499	20.7999	23.7244	16.2496	23.0744	20.7995	26.3243	23.7244	19.4995
68	12.1333	18.6333	20.7999	23.7244	16.2496	23.0744	21.4495	26.6493	23.7244	19.4995
69	12.35	18.8499	20.5833	23.7244	16.2496	22.4244	21.4495	26.3243	23.7244	19.4995
70	11.9166	18.6333	20.7999	23.7244	16.2496	22.0994	21.1245	25.9994	23.7244	19.1745
71	12.1333	18.8499	20.7999	23.7244	15.9246	22.4244	21.4495	25.9994	23.7244	18.8495
72	12.35	18.6333	20.7999	23.7244	15.9246	23.0744	21.4495	26.3243	24.0494	19.1745
73	11.9166	19.0666	20.7999	23.7244	16.2496	23.0744	21.4495	25.9994	23.7244	19.4995
74	12.35	18.8499	20.7999	23.3994	15.9246	23.0744	21.4495	25.9994	23.7244	19.1745
75	11.7	18.8499	20.3666	23.7244	15.9246	23.3994	21.1245	25.9994	24.0494	18.8495
76	11.9166	18.8499	20.3666	23.0744	16.2496	23.7244	21.4495	25.9994	23.7244	19.1745
77	12.35	18.6333	20.3666	23.3994	16.5746	23.3994	21.1245	26.3243	23.7244	18.8495
78	11.9166	18.8499	20.3666	23.3994	16.2496	23.0744	21.1245	25.3494	24.0494	18.8495
79	11.9166	18.4166	20.5833	23.0744	15.9246	23.0744	21.1245	25.3494	24.0494	18.8495
80	11.7	18.6333	20.3666	23.0744	15.9246	23.0744	21.1245	25.3494	24.0494	18.5245
81	11.7	18.6333	20.3666	23.0744	16.2496	23.0744	21.1245	25.0244	23.7244	18.5245
82	12.1333	18.6333	19.9333	23.0744	16.2496	22.7494	21.4495	25.0244	24.0494	18.5245
83	11.9166	18.6333	20.1499	23.0744	16.2496	23.0744	21.1245	25.0244	24.0494	19.1745
84	11.7	18.6333	20.3666	23.0744	16.5746	22.7494	20.7995	25.3494	23.3994	18.8495
85	11.7	18.6333	20.1499	23.0744	16.2496	22.7494	21.4495	25.3494	23.7244	18.5245
86	11.7	18.6333	20.1499	23.0744	16.2496	22.7494	20.1495	24.6994	23.7244	18.8495
87	11.9166	18.6333	19.9333	23.0744	16.2496	22.7494	20.4745	24.6994	24.0494	18.8495
88	11.4833	18.4166	19.9333	23.0744	16.2496	22.7494	20.7995	25.0244	24.0494	18.1995
89	11.7	18.4166	20.1499	22.7494	16.2496	23.3994	21.1245	24.6994	23.7244	17.8746
90	11.9166	18.6333	19.7166	23.0744	16.2496	22.7494	20.4745	24.0494	24.0494	18.5245
91	11.4833	18.6333	19.7166	22.7494	16.8996	23.3994	20.7995	25.0244	23.7244	18.5245
92	11.9166	18.6333	20.1499	22.7494	16.8996	22.7494	21.1245	24.3744	23.7244	17.8746
93	11.4833	18.1999	19.9333	22.7494	16.8996	22.7494	21.1245	24.3744	23.3994	18.1995
94	11.7	18.4166	19.7166	22.7494	16.5746	23.0744	21.1245	24.6994	23.7244	18.1995
95	11.4833	18.6333	19.7166	22.7494	16.5746	23.0744	20.7995	24.3744	23.7244	18.1995
96	11.7	18.4166	19.4999	22.4244	16.5746	23.3994	20.4745	24.0494	23.7244	18.1995
97	11.2666	18.6333	19.9333	22.4244	16.5746	22.7494	21.1245	23.7244	23.7244	18.8495
98	11.7	18.1999	19.7166	22.4244	16.5746	23.0744	20.7995	24.0494	23.7244	18.1995
99	11.2666	18.4166	19.9333	22.4244	16.5746	23.0744	21.1245	24.3744	23.7244	18.1995
100	11.2666	18.4166	19.2833	22.4244	16.5746	22.7494	20.4745	23.3994	23.3994	18.1995
101	11.7	18.1999	19.4999	22.4244	16.5746	22.7494	20.7995	23.7244	23.3994	18.1995
102	11.2666	18.4166	19.7166	22.4244	16.2496	23.0744	20.1495	23.7244	23.3994	18.1995
103	11.2666	18.4166	19.2833	22.4244	16.5746	23.0744	20.7995	23.3994	23.3994	17.8746
104	11.9166	18.4166	19.2833	22.4244	16.5746	23.0744	20.7995	24.3744	23.3994	18.1995
105	11.4833	18.4166	19.4999	22.4244	16.2496	23.3994	20.7995	24.0494	23.3994	17.8746
106	11.7	18.4166	19.2833	22.4244	16.2496	23.0744	20.4745	23.7244	23.0744	17.8746
107	11.4833	18.1999	19.2833	22.4244	15.9246	23.0744	20.1495	23.7244	23.0744	17.8746
108	11.7	18.4166	19.4999	22.4244	16.2496	23.0744	20.4745	23.7244	23.7244	17.8746
109	11.4833	18.1999	19.0666	22.4244	15.9246	23.0744	20.7995	23.7244	22.7494	18.1995
110	11.4833	18.4166	19.2833	22.4244	15.9246	23.3994	20.1495	23.7244	23.3994	17.8746
111	11.4833	18.4166	19.0666	22.4244	16.5746	22.7494	20.1495	23.7244	23.0744	18.1995
112	11.7	18.4166	18.8499	22.4244	15.9246	22.4244	20.7995	23.3994	23.3994	18.1995
113	11.4833	18.4166	19.0666	22.4244	15.9246	22.4244	21.1245	23.0744	22.7494	17.8746
114	11.7	18.4166	19.2833	22.0994	16.2496	23.0744	20.1495	23.7244	23.0744	17.8746
115	11.7	18.4166	18.8499	22.4244	15.9246	23.0744	20.4745	23.3994	22.4244	18.1995
116	11.4833	18.1999	18.8499	22.0994	16.2496	23.0744	20.4745	23.0744	22.4244	17.5496
117	11.9166	18.4166	19.0666	22.0994	16.8996	23.0744	20.4745	23.0744	22.4244	17.8746
118	11.9166	18.4166	19.0666	22.0994	16.5746	23.3994	20.1495	22.7494	23.0744	18.1995
119	11.7	18.4166	18.8499	21.7745	16.5746	22.4244	20.1495	22.7494	22.4244	17.8746
120	11.7	18.4166	18.8499	22.0994	15.9246	23.0744	20.4745	22.7494	22.4244	18.1995
121	11.7	18.6333	18.6333	22.0994	16.2496	22.7494	19.8245	22.7494	22.0994	17.8746
122	11.9166	18.1999	18.8499	21.7745	16.5746	22.7494	20.1495	23.0744	22.4244	17.8746
123	11.7	18.1999	19.0666	21.7745	16.5746	23.3994	20.4745	23.3994	22.4244	17.8746
124	11.4833	18.1999	19.0666	22.0994	16.5746	23.3994	20.1495	23.0744	22.4244	17.8746
125	11.4833	18.1999	18.6333	21.7745	16.5746	22.7494	20.4745	23.0744	21.7745	17.8746
126	11.7	18.1999	18.6333	22.0994	16.5746	22.7494	20.1495	23.0744	22.0994	17.8746
127	11.2666	18.1999	18.6333	22.0994	16.5746	22.7494	20.1495	23.0744	22.4244	17.8746
128	11.9166	18.1999	18.6333	22.0994	15.9246	23.0744	20.1495	23.0744	22.0994	17.8746
129	11.4833	18.4166	18.8499	22.0994	16.5746	22.7494	20.1495	22.7494	22.7494	17.5496
130	11.7	18.4166	18.6333	22.4244	16.5746	23.0744	20.1495	22.7494	22.4244	17.8746
131	11.4833	17.7666	18.8499	22.4244	16.2496	23.3994	20.1495	22.7494	21.7745	17.8746
132	11.9166	17.7666	19.0666	21.7745	16.5746	22.7494	19.8245	22.7494	22.0994	17.8746
133	11.4833	17.3333	18.4166	21.7745	16.5746	22.7494	20.7995	23.3994	21.7745	17.8746
134	11.4833	17.5499	18.6333	21.4495	16.5746	23.3994	20.1495	22.7494	21.7745	17.8746
135	11.9166	17.5499	18.8499	21.4495	16.5746	22.7494	20.1495	23.0744	22.0994	17.8746
136	11.7	17.5499	18.6333	21.4495	16.8996	23.0744	20.1495	23.0744	21.4495	18.1995
137	11.4833	17.3333	19.0666	21.4495	15.9246	23.0744	19.8245	22.4244	21.7745	18.1995
138	11.9166	17.3333	18.6333	21.4495	16.2496	23.3994	20.1495	23.0744	22.4244	18.1995
139	11.7	17.5499	18.8499	21.4495	16.5746	22.7494	19.4995	23.0744	22.0994	17.8746
140	11.9166	17.3333	18.6333	21.4495	16.5746	22.7494	20.4745	23.0744	21.4495	17.8746
141	11.7	17.3333	18.4166	21.4495	16.8996	23.3994	19.8245	22.4244	21.7745	18.5245
142	11.2666	17.3333	18.6333	21.1245	16.5746	22.7494	19.4995	23.3994	21.7745	18.1995
143	11.7	17.5499	19.0666	21.4495	16.8996	22.7494	19.8245	23.0744	21.4495	18.1995
144	11.9166	17.3333	18.8499	21.4495	16.2496	22.7494	19.8245	23.0744	21.7745	18.5245
145	11.7	17.3333	18.8499	21.4495	16.2496	22.4244	20.4745	22.7494	22.0994	18.5245
146	11.7	17.3333	19.0666	21.1245	16.8996	22.0994	20.1495	22.4244	21.4495	18.5245
147	11.7	17.3333	18.8499	21.4495	16.5746	22.7494	19.1745	22.7494	21.7745	17.8746
148	11.4833	17.1166	18.8499	21.4495	16.5746	22.4244	19.4995	22.4244	21.4495	17.8746
149	11.9166	17.3333	18.6333	21.1245	16.8996	22.7494	19.8245	22.4244	21.4495	18.1995
150	11.9166	17.1166	18.8499	21.1245	16.8996	22.7494	19.8245	22.7494	22.0994	17.8746
151	11.7	17.3333	18.6333	21.1245	16.5746	22.4244	19.4995	22.7494	20.7995	18.1995
152	11.9166	17.3333	18.6333	21.1245	16.2496	23.0744	19.4995	22.7494	21.4495	17.8746
153	11.7	17.5499	18.8499	21.1245	16.2496	23.0744	19.4995	23.0744	21.4495	17.8746
154	11.9166	17.5499	18.6333	21.1245	16.8996	23.0744	19.4995	23.0744	20.7995	17.8746
155	11.4833	17.1166	18.8499	21.1245	16.5746	23.3994	20.1495	23.0744	20.7995	17.8746
156	12.1333	17.5499	18.6333	21.1245	16.5746	23.0744	19.4995	23.0744	20.4745	18.1995
157	11.9166	17.3333	18.4166	21.1245	16.2496	22.7494	18.8495	23.3994	20.7995	17.8746
158	12.35	17.5499	18.6333	21.1245	16.8996	22.7494	19.1745	23.0744	20.7995	17.5496
159	11.7	17.5499	18.4166	21.1245	16.2496	23.3994	19.4995	23.0744	20.7995	17.8746
160	11.9166	17.5499	18.6333	21.1245	16.8996	23.3994	19.4995	23.0744	21.1245	17.8746
161	11.4833	17.5499	18.6333	21.1245	16.2496	22.7494	19.8245	23.3994	21.1245	17.5496
162	11.7	17.7666	18.6333	21.1245	16.2496	23.3994	19.8245	23.0744	20.4745	17.8746
163	11.9166	17.7666	18.6333	21.1245	15.9246	23.0744	19.1745	23.0744	20.1495	17.5496
164	12.1333	17.5499	18.6333	21.1245	16.2496	23.0744	19.8245	23.3994	20.7995	18.1995
165	11.9166	17.7666	18.4166	21.1245	16.2496	23.3994	18.8495	23.0744	20.7995	17.5496
166	11.7	17.7666	18.1999	21.1245	15.5996	23.0744	19.8245	23.0744	20.7995	17.5496
167	11.9166	17.7666	18.1999	21.1245	15.9246	23.0744	18.8495	23.3994	20.1495	17.8746
168	12.1333	18.1999	18.4166	21.1245	15.9246	23.0744	19.4995	23.3994	20.4745	17.5496
169	11.7	17.7666	18.4166	21.1245	15.9246	23.3994	19.1745	23.3994	20.1495	17.8746
170	12.1333	17.9833	18.1999	21.1245	15.5996	22.7494	19.1745	23.0744	20.1495	18.1995
171	11.9166	17.7666	18.8499	21.1245	15.9246	22.4244	19.4995	23.3994	20.1495	17.8746
172	11.7	17.7666	18.1999	20.7995	15.5996	23.0744	19.1745	23.7244	20.4745	18.1995
173	11.4833	17.7666	19.0666	21.1245	15.9246	23.0744	19.4995	23.7244	20.4745	18.8495
174	11.7	17.7666	18.8499	21.1245	15.5996	22.7494	19.4995	23.7244	20.1495	18.5245
175	11.4833	17.7666	19.0666	21.1245	15.5996	23.3994	19.1745	23.3994	20.1495	18.1995
176	11.4833	17.7666	18.6333	20.7995	15.5996	23.0744	18.8495	24.0494	19.8245	17.8746
177	12.1333	17.7666	18.6333	21.1245	15.2746	22.4244	19.1745	23.7244	20.7995	18.1995
178	11.7	17.7666	18.8499	21.1245	15.5996	23.0744	19.4995	23.7244	20.7995	17.8746
179	11.7	17.5499	18.4166	21.1245	15.5996	22.7494	20.1495	23.3994	20.4745	18.1995
180	11.7	17.5499	18.4166	21.1245	15.5996	23.0744	18.5245	23.7244	20.4745	17.8746
181	11.7	17.5499	18.6333	21.1245	14.9496	22.7494	18.8495	23.7244	21.1245	18.1995
182	11.9166	17.5499	18.8499	21.1245	15.2746	22.4244	19.1745	23.7244	21.1245	18.5245
183	11.9166	17.5499	18.8499	21.1245	15.9246	22.7494	19.4995	24.0494	21.1245	18.1995
184	11.7	17.5499	18.4166	21.1245	15.9246	22.4244	19.1745	23.7244	20.1495	18.1995
185	11.9166	17.3333	18.6333	21.1245	15.5996	22.7494	18.8495	24.0494	21.4495	18.5245
186	11.9166	17.5499	18.6333	21.1245	15.9246	22.4244	18.8495	24.0494	20.7995	18.5245
187	11.7	17.3333	18.8499	21.1245	15.5996	22.4244	18.8495	23.7244	20.4745	18.1995
188	11.7	17.5499	18.6333	21.1245	15.2746	23.3994	19.8245	23.7244	21.1245	17.8746
189	11.7	17.7666	18.8499	21.1245	15.5996	22.7494	19.1745	23.7244	21.4495	17.8746
190	11.7	17.5499	18.6333	21.1245	15.9246	23.0744	19.4995	24.0494	20.4745	18.1995
191	11.7	17.5499	18.6333	21.1245	15.5996	22.7494	19.1745	24.0494	20.7995	17.8746
192	11.7	17.7666	18.6333	21.1245	15.9246	22.7494	18.8495	24.0494	20.4745	17.8746
193	11.7	17.7666	18.8499	21.1245	15.5996	22.7494	19.1745	23.7244	20.7995	18.5245
194	11.4833	17.5499	18.6333	21.4495	15.5996	22.7494	19.4995	24.3744	21.1245	17.8746
195	12.1333	17.5499	18.8499	21.4495	15.5996	22.7494	19.4995	24.0494	20.7995	18.5245
196	11.7	17.7666	18.8499	21.1245	15.5996	23.0744	18.8495	24.3744	21.1245	18.1995
197	11.7	17.7666	18.6333	21.1245	15.9246	22.7494	18.8495	24.3744	20.4745	18.8495
198	11.7	17.7666	18.8499	21.1245	14.2996	23.0744	18.8495	24.3744	20.4745	18.8495
199	11.9166	17.9833	18.6333	21.1245	15.2746	22.7494	19.1745	24.0494	20.7995	18.5245
200	11.7	17.9833	18.6333	21.4495	15.9246	23.3994	19.1745	24.0494	21.1245	18.8495
201	11.7	17.7666	18.4166	21.4495	15.5996	23.0744	19.4995	24.3744	20.7995	18.8495
202	11.7	17.9833	18.8499	21.4495	15.5996	23.0744	18.8495	23.7244	20.7995	18.8495
203	11.9166	17.7666	18.6333	21.4495	15.9246	22.7494	18.8495	24.3744	20.7995	18.8495
204	11.7	17.5499	18.6333	21.4495	15.9246	23.0744	18.8495	24.0494	20.7995	18.5245
205	11.4833	17.5499	19.0666	21.4495	15.2746	22.7494	19.1745	24.0494	20.4745	18.5245
206	11.7	17.5499	18.8499	21.4495	15.9246	23.3994	19.1745	24.3744	20.7995	18.8495
207	11.9166	17.5499	18.8499	21.4495	15.5996	23.0744	18.8495	24.0494	21.4495	18.5245
208	11.9166	17.5499	18.4166	21.7745	14.9496	22.7494	19.1745	24.3744	20.1495	18.5245
209	12.1333	17.7666	18.8499	21.4495	15.2746	22.4244	18.8495	24.3744	20.4745	18.8495
210	11.7	17.5499	18.8499	21.4495	14.9496	23.0744	18.8495	24.3744	20.4745	18.5245
211	12.1333	17.5499	18.8499	21.4495	15.2746	22.7494	18.8495	24.0494	20.4745	19.1745
212	11.9166	17.7666	19.0666	21.4495	15.2746	22.7494	19.1745	24.3744	20.4745	19.1745
213	11.7	17.5499	19.0666	21.4495	15.2746	23.0744	18.8495	24.3744	20.1495	18.8495
214	11.9166	17.5499	18.8499	21.7745	15.2746	23.0744	19.1745	24.3744	20.1495	19.1745
215	11.9166	17.5499	18.8499	21.7745	15.2746	22.7494	18.8495	24.6994	21.1245	19.1745
216	11.7	17.5499	18.8499	21.4495	15.5996	22.4244	19.1745	24.3744	20.7995	18.8495
217	11.7	17.3333	18.8499	21.4495	15.2746	22.4244	18.8495	24.0494	20.7995	18.5245
218	11.9166	17.3333	18.8499	21.7745	15.2746	22.7494	18.8495	24.6994	21.4495	18.5245
219	11.9166	17.5499	18.8499	21.4495	14.9496	23.0744	18.5245	24.3744	21.1245	19.1745
220	11.7	17.5499	18.8499	21.7745	15.2746	22.7494	19.1745	24.3744	20.4745	19.1745
221	11.9166	17.3333	18.8499	21.7745	15.5996	23.3994	18.8495	24.6994	19.8245	19.1745
222	11.9166	17.3333	19.0666	21.7745	15.9246	22.7494	18.8495	24.6994	20.1495	19.1745
223	11.7	17.3333	18.8499	21.7745	15.5996	22.7494	18.8495	24.3744	20.4745	18.8495
224	11.9166	17.3333	19.0666	21.4495	15.5996	23.0744	18.8495	24.6994	19.8245	18.8495
225	11.9166	17.5499	19.0666	21.4495	15.5996	22.7494	18.5245	24.6994	20.1495	18.8495
226	11.9166	17.3333	19.0666	21.4495	15.5996	22.7494	18.1995	24.3744	20.7995	19.1745
227	11.9166	17.5499	18.8499	21.7745	15.9246	23.0744	17.8746	24.6994	20.4745	18.5245
228	11.9166	17.1166	18.8499	21.7745	15.5996	22.4244	18.1995	24.3744	19.8245	18.8495
229	11.9166	17.3333	19.0666	21.7745	15.5996	23.0744	18.5245	24.6994	20.4745	18.8495
230	11.9166	17.3333	18.8499	21.7745	15.5996	23.0744	18.5245	24.6994	20.4745	19.1745
231	11.9166	17.3333	18.8499	21.7745	15.9246	23.0744	17.8746	24.6994	19.8245	18.5245
232	11.4833	17.5499	19.0666	21.4495	15.2746	22.0994	18.5245	24.3744	20.4745	19.1745
233	11.9166	17.5499	18.8499	21.7745	15.9246	22.0994	18.8495	24.6994	20.1495	18.8495
234	11.9166	17.3333	18.8499	21.4495	15.5996	23.0744	18.5245	25.0244	20.1495	19.1745
235	11.7	17.3333	19.0666	21.7745	15.9246	22.4244	17.8746	25.0244	20.7995	18.8495
236	11.7	17.3333	19.0666	21.4495	15.5996	22.4244	18.5245	24.0494	20.7995	18.5245
237	11.9166	17.3333	18.8499	21.4495	15.5996	22.4244	18.1995	25.0244	20.7995	18.5245
238	11.7	17.5499	19.2833	22.0994	15.5996	23.0744	18.8495	24.6994	20.1495	18.1995
239	11.7	17.5499	19.2833	21.7745	15.9246	22.4244	18.5245	24.6994	20.1495	18.5245
240	11.7	17.5499	19.2833	21.4495	15.9246	23.0744	18.1995	25.0244	20.4745	18.8495
241	11.7	17.5499	19.2833	21.4495	16.2496	22.7494	18.1995	25.0244	21.4495	18.5245
242	11.9166	17.3333	19.4999	21.7745	16.2496	22.7494	18.5245	25.3494	20.1495	18.8495
243	11.9166	17.3333	19.2833	21.7745	15.9246	22.7494	18.5245	24.6994	20.4745	18.5245
244	11.7	17.5499	19.2833	21.7745	15.9246	22.4244	18.1995	25.0244	20.4745	18.5245
245	11.7	17.5499	19.0666	21.7745	16.2496	23.3994	18.1995	25.0244	20.7995	18.8495
246	11.7	17.5499	19.0666	21.4495	15.9246	22.7494	18.1995	24.6994	20.7995	18.5245
247	11.4833	17.3333	19.2833	21.7745	16.2496	22.7494	18.5245	25.0244	20.1495	18.5245
248	11.7	17.1166	19.2833	21.4495	15.9246	22.7494	18.1995	25.0244	20.4745	18.5245
249	11.7	17.3333	19.2833	21.7745	15.9246	22.7494	18.5245	24.6994	21.1245	18.8495
250	11.7	17.3333	19.4999	21.4495	15.9246	22.4244	18.5245	25.3494	20.7995	18.5245
251	11.7	17.3333	19.2833	21.4495	15.9246	22.4244	18.1995	24.6994	20.4745	18.5245
252	11.4833	17.3333	19.0666	22.0994	15.9246	23.0744	18.5245	25.0244	20.7995	18.5245
253	11.7	17.3333	19.2833	21.7745	15.9246	23.0744	18.1995	25.6744	19.8245	18.5245
254	11.9166	17.5499	19.0666	21.7745	15.9246	22.7494	18.5245	25.3494	20.4745	19.1745
255	11.7	17.3333	19.2833	21.7745	15.9246	23.0744	18.5245	25.0244	20.1495	18.8495
256	11.4833	17.3333	19.2833	21.4495	15.9246	22.7494	18.8495	25.0244	20.7995	19.1745
257	11.7	17.3333	19.4999	21.7745	15.9246	22.7494	18.1995	24.6994	20.7995	18.1995
258	11.4833	17.5499	19.4999	21.7745	15.5996	22.0994	18.5245	25.0244	21.1245	18.5245
259	11.7	17.3333	19.4999	22.0994	15.9246	22.4244	18.5245	25.3494	21.1245	19.1745
260	11.4833	17.3333	19.2833	21.4495	15.9246	22.7494	18.1995	25.0244	21.1245	18.5245
261	11.7	17.5499	19.4999	22.0994	15.9246	22.0994	18.1995	25.0244	20.4745	18.8495
262	11.7	17.3333	19.4999	21.7745	16.2496	22.0994	18.8495	25.3494	21.1245	19.1745
263	11.7	17.5499	19.4999	22.0994	15.9246	22.7494	18.5245	25.0244	20.4745	18.8495
264	11.4833	17.5499	19.2833	21.7745	15.5996	23.0744	18.5245	25.0244	20.4745	18.5245
265	11.7	17.3333	19.4999	22.0994	15.9246	23.0744	18.1995	25.0244	20.7995	18.8495
266	11.2666	17.3333	19.4999	21.7745	15.9246	22.7494	18.5245	25.3494	20.7995	18.5245
267	11.7	17.3333	19.4999	22.0994	15.9246	22.4244	17.8746	24.6994	20.4745	18.8495
268	11.7	17.3333	19.4999	22.0994	15.9246	22.4244	18.5245	25.3494	20.4745	18.5245
269	11.2666	17.3333	19.4999	22.0994	15.9246	22.7494	18.1995	25.3494	20.4745	18.5245
270	11.4833	17.1166	19.2833	22.0994	15.9246	22.7494	18.5245	25.0244	20.1495	18.8495
271	11.4833	17.5499	19.2833	21.7745	16.2496	22.4244	17.5496	25.0244	20.4745	18.8495
272	11.4833	17.3333	19.4999	22.0994	15.5996	22.7494	18.5245	24.6994	20.7995	18.8495
273	11.9166	17.3333	19.2833	22.0994	15.9246	22.4244	18.5245	25.3494	20.4745	18.5245
274	11.4833	17.1166	19.4999	22.0994	15.9246	23.0744	18.1995	25.3494	20.4745	18.8495
275	11.7	17.3333	19.2833	22.0994	15.9246	22.7494	18.1995	25.0244	20.1495	18.5245
276	11.9166	17.3333	19.2833	22.0994	15.9246	22.7494	18.5245	25.3494	19.8245	18.5245
277	11.7	17.3333	19.2833	21.7745	15.9246	22.7494	18.5245	25.3494	20.1495	18.8495
278	11.7	17.1166	19.4999	21.7745	16.2496	23.0744	18.1995	25.0244	20.1495	18.8495
279	11.4833	17.3333	19.4999	21.4495	15.9246	22.4244	18.8495	24.6994	19.8245	18.5245
280	11.4833	17.1166	19.4999	21.7745	15.9246	23.0744	18.5245	25.3494	20.1495	18.8495
281	11.9166	17.1166	19.4999	21.7745	16.2496	22.4244	18.8495	25.3494	20.1495	18.8495
282	11.4833	17.3333	19.2833	22.0994	15.9246	22.0994	18.1995	25.3494	19.8245	18.5245
283	11.2666	17.1166	19.4999	22.0994	15.9246	22.4244	18.5245	25.3494	20.1495	18.8495
284	11.2666	17.3333	19.4999	22.0994	15.2746	22.7494	18.8495	25.6744	20.1495	18.8495
285	11.4833	17.1166	19.2833	21.7745	15.9246	22.7494	18.5245	25.6744	19.1745	18.5245
286	11.4833	17.1166	19.2833	22.0994	15.5996	22.7494	18.1995	25.3494	19.4995	18.5245
287	11.9166	17.3333	19.2833	22.0994	15.2746	22.7494	18.5245	25.6744	19.4995	18.8495
288	11.4833	17.1166	19.2833	21.7745	16.2496	22.4244	18.5245	25.0244	20.1495	18.8495
289	11.7	17.3333	19.2833	22.0994	15.5996	22.7494	18.5245	24.6994	19.4995	18.8495
290	11.7	17.3333	19.2833	21.7745	15.5996	22.4244	18.5245	25.3494	20.7995	18.8495
291	11.4833	17.1166	19.4999	22.0994	15.9246	22.4244	18.5245	25.9994	20.1495	18.8495
292	11.4833	17.1166	19.2833	21.7745	15.9246	22.4244	18.5245	25.3494	20.1495	18.5245
293	11.9166	17.1166	19.2833	22.0994	15.9246	22.7494	18.5245	25.3494	19.8245	18.8495
294	11.4833	17.3333	19.2833	21.7745	16.2496	22.7494	18.1995	25.0244	20.4745	18.5245
295	11.7	17.1166	19.2833	22.0994	15.5996	22.4244	18.1995	25.3494	20.7995	18.5245
296	11.2666	17.1166	19.2833	21.7745	15.9246	22.7494	18.5245	25.6744	20.4745	18.1995
297	11.9166	17.1166	19.4999	21.7745	15.9246	22.7494	18.5245	25.3494	20.4745	18.1995
298	11.7	17.1166	19.2833	21.7745	15.9246	23.0744	18.5245	25.3494	20.7995	18.5245
299	11.2666	17.1166	19.2833	22.0994	15.5996	22.7494	18.5245	25.0244	20.4745	18.1995
300	11.05	17.1166	19.2833	22.0994	15.5996	22.4244	18.1995	25.6744	21.1245	18.5245
301	11.7	17.1166	19.4999	21.7745	15.9246	23.0744	17.8746	25.0244	20.4745	18.5245
302	11.4833	17.3333	19.2833	22.0994	15.5996	23.0744	18.5245	25.3494	20.7995	18.5245
303	11.4833	17.1166	19.4999	22.0994	15.5996	23.0744	18.5245	25.6744	20.7995	18.8495
304	11.4833	17.1166	19.7166	22.0994	15.9246	23.3994	18.5245	25.6744	20.7995	18.8495
305	11.2666	17.3333	19.7166	22.0994	15.9246	23.0744	18.1995	25.6744	21.1245	18.8495
306	11.7	17.1166	19.4999	21.7745	15.5996	23.3994	18.5245	25.3494	20.7995	18.8495
307	11.4833	17.1166	19.2833	22.0994	15.5996	22.7494	18.1995	25.6744	20.7995	18.8495
308	11.4833	17.1166	19.4999	22.0994	15.9246	23.3994	18.8495	25.3494	20.7995	18.8495
309	11.4833	17.5499	19.4999	21.7745	15.9246	23.3994	18.5245	25.0244	20.7995	18.8495
310	11.4833	17.1166	19.2833	22.0994	15.9246	23.0744	18.1995	25.6744	20.1495	18.8495
311	11.2666	17.1166	19.2833	21.7745	16.2496	23.3994	18.5245	25.9994	20.7995	18.8495
312	11.4833	17.1166	19.4999	22.0994	15.9246	23.0744	18.5245	25.3494	20.7995	18.5245
313	11.2666	17.3333	19.4999	22.0994	15.5996	22.7494	18.5245	25.6744	20.7995	18.5245
314	11.4833	17.1166	19.2833	22.0994	15.9246	22.7494	18.8495	25.6744	21.4495	18.8495
315	11.7	17.1166	19.4999	21.7745	15.5996	22.7494	18.5245	25.6744	20.7995	18.5245
316	11.7	17.1166	19.2833	22.0994	16.2496	22.4244	18.1995	25.9994	20.4745	18.8495
317	11.7	17.1166	19.4999	22.0994	15.9246	22.4244	18.5245	25.6744	21.1245	18.5245
318	11.4833	17.3333	19.4999	22.0994	15.5996	22.4244	18.5245	25.6744	20.7995	18.5245
319	11.4833	17.1166	19.4999	21.7745	16.2496	22.7494	18.5245	25.3494	20.4745	18.8495
320	11.9166	17.3333	19.4999	21.7745	15.9246	22.4244	18.5245	25.3494	20.4745	18.5245
321	11.7	17.1166	19.7166	22.0994	16.2496	22.4244	18.8495	25.9994	20.1495	19.1745
322	11.9166	17.1166	19.7166	21.7745	16.2496	22.0994	18.5245	25.9994	20.1495	18.5245
323	11.7	17.1166	19.4999	22.0994	16.2496	22.4244	18.1995	25.6744	20.7995	19.1745
324	11.7	17.1166	19.4999	22.0994	15.9246	22.0994	18.5245	25.6744	20.7995	19.1745
325	11.4833	17.1166	19.7166	22.0994	15.9246	22.4244	18.8495	25.6744	20.7995	18.5245
326	11.7	17.1166	19.7166	22.0994	16.2496	22.0994	18.8495	25.6744	20.1495	19.1745
327	11.4833	17.1166	19.7166	22.0994	15.9246	22.0994	18.5245	25.3494	19.8245	19.1745
328	11.4833	17.1166	19.4999	22.0994	15.9246	22.7494	18.5245	25.6744	20.1495	18.8495
329	11.4833	17.3333	19.7166	22.0994	15.9246	22.4244	18.5245	25.6744	20.1495	19.1745
330	11.7	17.1166	19.4999	22.0994	15.9246	22.7494	18.1995	25.9994	19.8245	19.1745
331	11.7	17.1166	19.7166	22.0994	15.5996	22.4244	18.5245	25.9994	19.8245	18.8495
332	11.7	17.1166	19.7166	22.0994	15.5996	22.0994	18.5245	25.6744	19.4995	18.8495
333	11.4833	17.1166	19.7166	22.0994	16.2496	22.7494	18.8495	25.9994	19.8245	18.8495
334	11.4833	17.1166	19.7166	22.0994	15.5996	22.4244	17.8746	25.6744	19.8245	19.1745
335	11.7	17.1166	19.7166	22.0994	16.2496	22.0994	18.1995	25.3494	20.4745	18.8495
336	11.7	17.1166	19.7166	22.0994	15.9246	22.7494	18.1995	25.9994	20.1495	18.8495
337	11.4833	17.1166	19.7166	22.0994	15.5996	22.4244	18.5245	25.6744	19.8245	18.8495
338	11.7	17.1166	19.7166	22.0994	16.2496	22.7494	18.1995	25.6744	19.8245	18.8495
339	11.7	17.3333	19.7166	22.0994	15.2746	22.7494	18.1995	25.6744	20.1495	18.8495
340	11.7	17.1166	19.7166	22.0994	15.5996	22.7494	18.5245	25.6744	19.4995	18.5245
341	11.4833	17.1166	19.4999	22.0994	16.2496	22.4244	18.5245	25.3494	19.4995	19.1745
342	11.4833	17.1166	19.9333	22.0994	15.9246	22.7494	18.5245	25.9994	19.8245	18.8495
343	11.4833	17.1166	19.7166	22.0994	16.2496	22.4244	18.5245	25.9994	19.4995	19.1745
344	11.4833	17.3333	19.7166	22.0994	15.5996	22.4244	18.5245	25.6744	20.1495	18.8495
345	11.4833	17.1166	19.7166	22.0994	15.5996	23.0744	18.1995	25.6744	20.4745	18.8495
346	11.4833	16.8999	19.7166	22.0994	15.9246	22.7494	18.5245	25.6744	20.1495	18.8495
347	11.4833	17.1166	19.7166	22.0994	16.2496	22.7494	18.8495	25.9994	20.1495	18.8495
348	11.2666	17.5499	19.9333	22.0994	16.2496	22.7494	18.5245	26.3243	19.8245	19.1745
349	11.2666	17.1166	20.1499	22.0994	15.9246	22.7494	18.5245	25.9994	19.4995	19.1745
350	11.7	17.1166	19.7166	21.7745	15.9246	22.4244	18.5245	25.9994	19.8245	19.1745
351	11.4833	17.1166	19.9333	22.0994	15.9246	22.7494	18.5245	26.3243	19.4995	18.8495
352	11.7	16.8999	19.9333	22.0994	15.5996	22.4244	18.8495	25.9994	19.1745	19.1745
353	11.2666	16.8999	19.9333	22.0994	15.5996	22.4244	18.5245	25.9994	19.4995	19.1745
354	11.4833	16.8999	19.9333	22.0994	15.9246	22.7494	18.5245	25.6744	19.4995	18.8495
355	11.4833	16.8999	19.4999	22.0994	15.5996	22.0994	18.8495	25.6744	19.8245	18.8495
356	11.9166	17.1166	19.7166	22.0994	15.5996	22.7494	18.1995	25.6744	19.4995	18.8495
357	11.4833	17.1166	19.9333	22.0994	15.2746	22.7494	18.5245	25.6744	19.8245	18.8495
358	11.2666	17.3333	19.9333	22.0994	15.9246	22.7494	18.5245	25.9994	19.8245	18.8495
359	11.4833	17.1166	19.9333	22.0994	15.5996	22.7494	18.5245	25.6744	19.8245	19.1745
360	11.2666	17.1166	19.7166	22.0994	15.5996	23.0744	18.5245	25.9994	19.8245	19.1745
361	11.7	16.8999	19.9333	22.0994	15.5996	22.4244	18.5245	26.3243	19.4995	19.1745
362	11.2666	17.1166	19.7166	22.0994	15.9246	23.0744	18.8495	25.3494	19.8245	19.4995
363	11.4833	17.1166	19.7166	21.7745	15.9246	23.0744	18.5245	25.6744	19.4995	19.4995
364	11.4833	17.1166	19.9333	22.0994	15.5996	22.7494	18.5245	25.6744	19.4995	19.4995
365	11.4833	17.1166	19.7166	22.0994	15.9246	22.4244	18.5245	25.9994	18.8495	19.1745
366	11.4833	16.8999	19.7166	22.0994	15.9246	22.7494	18.8495	25.6744	19.4995	19.1745
367	11.4833	17.1166	19.7166	22.0994	15.9246	22.4244	18.1995	25.3494	19.4995	19.4995
368	11.2666	17.1166	20.3666	22.0994	15.9246	22.4244	18.8495	25.9994	18.8495	19.1745
369	11.4833	17.1166	20.1499	22.0994	15.5996	22.7494	18.8495	25.6744	19.1745	19.4995
370	11.4833	17.1166	20.1499	22.0994	15.2746	22.7494	18.8495	25.9994	19.4995	19.1745
371	11.2666	16.8999	20.3666	22.4244	15.5996	22.7494	19.1745	26.3243	19.4995	19.1745
372	11.4833	17.1166	20.1499	22.4244	15.5996	22.0994	18.8495	25.9994	19.4995	19.4995
373	11.2666	17.1166	20.3666	22.0994	15.9246	22.4244	18.5245	26.3243	19.4995	19.4995
374	11.2666	17.1166	20.3666	22.0994	15.5996	22.0994	18.8495	26.3243	19.4995	19.4995
375	11.05	16.6833	20.3666	22.4244	16.2496	22.4244	19.1745	26.3243	19.1745	19.4995
376	11.4833	17.1166	20.1499	22.0994	15.5996	22.4244	18.8495	25.9994	18.8495	19.4995
377	11.2666	17.1166	20.3666	22.0994	15.2746	22.4244	18.5245	26.3243	19.1745	19.1745
378	11.2666	17.1166	20.5833	21.7745	15.9246	22.4244	18.8495	25.6744	19.4995	19.1745
379	11.2666	16.8999	20.3666	22.0994	15.9246	22.7494	18.5245	26.3243	19.1745	19.1745
380	11.2666	17.3333	20.1499	22.0994	15.5996	22.4244	18.8495	26.3243	19.1745	18.8495
381	11.2666	16.8999	20.3666	22.0994	15.5996	22.4244	18.5245	25.9994	19.1745	18.8495
382	11.4833	17.1166	20.3666	22.0994	15.5996	22.4244	18.8495	26.3243	19.4995	19.1745
383	11.2666	17.1166	20.3666	22.0994	15.9246	22.4244	18.5245	26.6493	18.8495	19.1745
384	11.2666	16.8999	20.3666	22.0994	15.5996	22.0994	18.8495	26.3243	19.1745	19.1745
385	11.2666	16.8999	20.3666	22.4244	15.5996	22.4244	18.8495	25.6744	18.8495	19.1745
386	11.4833	17.1166	20.1499	22.4244	14.9496	22.4244	18.5245	25.6744	19.8245	19.1745
387	11.2666	17.1166	20.3666	22.0994	16.2496	22.4244	18.5245	25.9994	19.1745	19.1745
388	11.2666	17.3333	20.3666	22.0994	16.2496	22.0994	18.8495	25.6744	19.4995	18.8495
389	11.4833	17.5499	20.1499	22.4244	16.2496	22.4244	18.1995	25.9994	19.1745	19.1745
390	11.2666	16.8999	20.1499	21.7745	15.5996	22.4244	18.8495	26.3243	19.8245	19.4995
391	11.2666	17.3333	20.3666	22.4244	16.2496	22.4244	18.8495	26.3243	19.4995	19.4995
392	11.7	17.1166	20.3666	22.0994	16.2496	22.4244	18.8495	26.3243	19.1745	19.4995
393	11.2666	17.1166	20.5833	22.4244	16.5746	22.4244	18.8495	25.9994	19.1745	19.4995
394	11.2666	17.3333	20.3666	22.4244	16.8996	22.4244	19.1745	26.3243	19.8245	19.4995
395	11.2666	17.1166	20.1499	22.4244	16.2496	22.4244	18.5245	26.3243	19.1745	19.4995
396	11.4833	17.1166	20.3666	22.0994	16.2496	22.4244	19.1745	26.6493	19.4995	19.4995
397	11.4833	16.8999	20.1499	22.0994	16.5746	22.4244	18.8495	25.9994	20.1495	19.4995
398	11.4833	16.8999	20.3666	22.4244	16.5746	22.4244	19.1745	25.9994	19.4995	19.4995
399	11.4833	16.8999	20.3666	22.4244	16.2496	22.4244	19.1745	25.6744	19.4995	19.1745
400	11.05	16.8999	20.5833	22.0994	16.5746	22.0994	19.1745	25.3494	19.4995	19.4995
401	11.2666	16.8999	20.5833	22.4244	16.5746	22.0994	18.8495	25.9994	19.1745	19.4995
402	11.4833	17.1166	20.3666	22.0994	16.5746	22.4244	18.8495	26.3243	19.1745	18.8495
403	11.2666	17.1166	20.5833	22.0994	16.5746	22.0994	18.8495	25.6744	18.8495	18.8495
404	11.4833	17.1166	20.3666	22.0994	16.2496	22.4244	18.1995	26.3243	19.1745	18.8495
405	11.05	17.1166	20.3666	22.0994	16.2496	22.4244	18.5245	26.3243	19.4995	18.8495
406	11.4833	16.8999	20.3666	22.0994	16.2496	22.4244	18.8495	26.3243	19.1745	18.8495
407	11.4833	17.1166	20.3666	22.4244	15.9246	22.0994	18.5245	25.9994	19.1745	19.1745
408	11.05	17.1166	20.3666	22.0994	15.2746	22.0994	19.1745	25.9994	19.1745	19.1745
409	11.2666	17.1166	20.3666	22.0994	15.5996	22.0994	19.1745	26.9743	19.8245	19.1745
410	11.4833	17.1166	20.5833	22.0994	16.2496	22.0994	18.5245	25.9994	19.8245	19.1745
411	11.4833	16.8999	20.3666	22.0994	15.9246	22.4244	18.8495	26.3243	19.1745	19.1745
412	11.2666	16.8999	20.3666	22.0994	15.9246	22.0994	18.8495	25.6744	19.4995	19.1745
413	11.2666	17.1166	20.3666	22.0994	15.9246	22.0994	18.5245	25.6744	19.4995	19.4995
414	11.2666	17.1166	20.5833	22.0994	16.2496	22.0994	19.1745	25.9994	19.1745	19.4995
415	11.2666	16.8999	20.5833	22.4244	16.2496	22.4244	18.8495	26.3243	19.1745	19.4995
416	11.4833	17.3333	20.5833	22.4244	15.9246	22.0994	18.8495	26.3243	19.4995	19.4995
417	11.7	17.1166	20.3666	22.4244	16.8996	22.4244	18.8495	25.9994	19.4995	19.1745
418	11.2666	16.8999	20.5833	22.4244	16.5746	22.0994	19.1745	26.6493	18.8495	19.1745
419	11.4833	16.8999	20.5833	22.0994	16.5746	22.0994	18.8495	25.9994	19.1745	18.8495
420	11.05	16.8999	20.5833	22.0994	16.5746	22.4244	18.1995	25.9994	18.8495	19.4995
421	11.4833	17.1166	20.5833	22.0994	16.5746	22.4244	19.1745	25.9994	18.8495	18.8495
422	11.2666	17.1166	20.3666	22.4244	16.2496	22.4244	18.8495	26.3243	19.4995	19.1745
423	11.05	17.1166	20.7999	22.0994	16.2496	22.0994	18.5245	26.3243	19.1745	18.8495
424	11.4833	17.1166	20.3666	22.0994	16.5746	22.4244	19.1745	26.6493	19.4995	18.8495
425	11.4833	17.1166	20.5833	21.7745	16.2496	22.0994	19.1745	26.3243	18.8495	18.8495
426	11.4833	16.8999	20.5833	22.0994	16.2496	22.0994	18.8495	25.9994	19.1745	19.1745
427	11.2666	16.8999	20.3666	22.0994	16.5746	22.0994	19.1745	27.2993	19.4995	18.8495
428	11.4833	17.1166	20.5833	22.4244	15.9246	22.0994	18.5245	26.9743	19.1745	19.1745
429	11.2666	16.8999	20.3666	22.4244	16.5746	21.7745	18.8495	26.3243	19.1745	18.8495
430	11.2666	17.3333	20.5833	22.4244	16.8996	22.0994	18.8495	26.3243	19.1745	18.8495
431	11.2666	17.1166	20.3666	22.0994	16.8996	22.4244	18.5245	26.3243	19.1745	18.8495
432	11.2666	17.1166	20.5833	22.0994	16.5746	22.0994	19.1745	25.9994	19.1745	18.8495
433	11.2666	16.8999	20.3666	22.0994	16.5746	22.0994	19.1745	26.3243	19.1745	18.8495
434	11.4833	16.6833	20.5833	22.0994	16.8996	22.4244	19.1745	26.3243	19.1745	18.8495
435	11.4833	16.8999	20.3666	22.0994	16.5746	22.0994	18.8495	26.3243	19.1745	18.8495
436	11.2666	17.1166	20.3666	22.4244	16.8996	22.4244	19.1745	25.9994	18.5245	18.5245
437	11.2666	17.1166	20.3666	22.4244	16.5746	22.4244	19.1745	26.9743	18.8495	18.5245
438	11.2666	17.1166	20.1499	22.4244	16.5746	22.4244	18.5245	26.9743	18.8495	18.5245
439	11.4833	17.1166	20.5833	22.0994	16.5746	22.4244	18.8495	25.9994	19.4995	18.5245
440	11.4833	17.3333	20.5833	22.4244	16.2496	22.4244	19.1745	26.6493	18.8495	18.8495
441	11.2666	17.1166	20.5833	22.0994	16.2496	21.7745	18.8495	25.9994	19.1745	18.5245
442	11.4833	17.1166	20.1499	22.4244	16.2496	22.4244	18.8495	25.6744	19.4995	18.8495
443	11.4833	17.1166	20.1499	22.0994	15.9246	22.0994	19.1745	26.3243	19.4995	18.8495
444	11.2666	17.1166	20.5833	22.4244	16.2496	22.0994	19.1745	25.9994	19.1745	18.8495
445	11.2666	17.1166	20.3666	22.0994	16.2496	22.4244	19.1745	25.9994	18.8495	19.1745
446	11.4833	17.1166	20.3666	22.4244	16.2496	22.4244	18.8495	26.3243	18.8495	18.8495
447	11.2666	16.8999	20.1499	22.0994	16.2496	22.0994	18.8495	25.9994	19.1745	18.8495
448	11.05	17.1166	20.3666	22.4244	15.9246	22.0994	19.1745	25.9994	19.1745	18.8495
449	11.2666	16.8999	20.3666	22.4244	16.2496	22.0994	19.4995	25.9994	19.8245	18.8495
450	11.05	16.8999	20.3666	22.7494	16.2496	21.7745	18.8495	26.6493	19.1745	18.8495
451	11.05	17.1166	20.5833	22.4244	15.9246	22.0994	18.8495	25.9994	19.1745	18.5245
452	11.2666	16.8999	20.3666	22.4244	16.2496	22.0994	19.1745	25.9994	19.8245	18.5245
453	11.2666	17.1166	20.1499	22.4244	16.2496	22.0994	19.1745	26.3243	19.1745	18.5245
454	11.2666	16.8999	20.1499	22.4244	16.2496	22.4244	19.1745	26.3243	19.4995	18.8495
455	11.7	16.6833	20.1499	22.4244	16.8996	22.4244	19.1745	26.6493	19.4995	18.8495
456	11.4833	16.6833	20.1499	22.4244	16.2496	22.4244	19.1745	26.3243	19.1745	18.8495
457	11.2666	17.3333	20.1499	22.4244	16.2496	22.4244	18.8495	25.9994	19.1745	18.8495
458	10.8333	16.8999	20.3666	22.7494	16.2496	21.7745	19.1745	26.6493	19.8245	18.5245
459	11.2666	17.1166	20.3666	22.4244	16.2496	22.0994	19.1745	25.6744	19.1745	18.8495
460	11.2666	16.8999	20.5833	22.4244	15.9246	21.7745	18.8495	26.9743	19.8245	18.8495
461	11.4833	17.1166	20.3666	22.4244	16.2496	22.4244	19.1745	26.6493	19.1745	19.1745
462	11.2666	16.8999	20.1499	22.7494	15.9246	21.7745	18.8495	26.6493	19.1745	18.8495
463	11.4833	16.8999	20.3666	22.4244	16.2496	22.4244	18.8495	26.6493	19.1745	19.1745
464	11.4833	17.1166	20.1499	22.4244	16.2496	22.0994	19.1745	26.9743	19.4995	18.8495
465	11.2666	16.8999	20.5833	22.4244	16.2496	22.4244	18.8495	25.6744	19.1745	18.8495
466	11.05	17.1166	20.3666	22.4244	16.2496	22.0994	19.1745	26.6493	19.8245	18.8495
467	11.4833	17.1166	20.5833	22.4244	16.2496	21.7745	19.1745	26.9743	19.8245	18.8495
468	11.05	16.8999	20.5833	22.4244	16.5746	22.0994	18.8495	25.9994	19.8245	19.1745
469	11.4833	17.1166	20.5833	22.4244	16.5746	22.0994	19.1745	26.9743	18.8495	18.8495
470	11.2666	16.6833	20.5833	22.4244	16.2496	22.4244	18.8495	26.6493	19.1745	19.4995
471	11.2666	16.8999	20.3666	22.4244	16.2496	22.4244	19.1745	26.9743	19.1745	19.4995
472	11.4833	17.1166	20.5833	22.0994	16.2496	22.0994	19.1745	26.6493	19.1745	19.1745
473	11.4833	16.6833	20.5833	22.4244	16.2496	21.7745	19.1745	25.9994	19.4995	18.8495
474	11.4833	16.8999	20.5833	22.4244	16.2496	22.4244	18.8495	26.3243	19.1745	19.1745
475	11.2666	16.6833	20.1499	22.4244	16.2496	22.4244	19.8245	26.3243	19.1745	19.1745
476	11.4833	17.1166	20.3666	22.0994	16.2496	22.4244	19.1745	26.6493	19.1745	18.8495
477	11.4833	17.1166	20.5833	22.4244	16.5746	22.0994	18.8495	26.3243	18.8495	18.8495
478	11.05	16.6833	20.5833	22.4244	16.5746	21.7745	18.8495	25.9994	20.1495	19.1745
479	11.4833	16.6833	20.3666	22.4244	16.2496	22.4244	18.8495	26.9743	18.8495	18.8495
480	11.2666	17.1166	20.3666	22.7494	16.5746	22.0994	18.8495	26.6493	19.1745	18.8495
481	10.8333	16.8999	20.3666	22.4244	16.8996	22.0994	19.4995	25.6744	19.1745	18.8495
482	11.05	16.6833	20.3666	22.4244	16.5746	22.0994	19.1745	26.9743	19.4995	18.8495
483	11.2666	17.1166	20.3666	22.4244	16.5746	22.4244	19.1745	26.9743	19.4995	18.5245
484	11.4833	16.8999	20.1499	22.7494	16.8996	22.0994	19.1745	27.2993	18.8495	18.8495
485	10.8333	16.8999	20.3666	22.4244	16.5746	22.4244	19.8245	26.3243	18.5245	18.8495
486	11.2666	16.6833	20.3666	22.4244	16.5746	22.0994	19.4995	25.9994	19.4995	18.8495
487	11.2666	17.1166	20.5833	22.4244	16.5746	22.4244	18.5245	26.9743	19.4995	18.8495
488	11.4833	16.8999	20.1499	22.4244	16.5746	22.0994	19.1745	26.9743	19.4995	18.8495
489	11.4833	16.8999	20.3666	22.4244	16.5746	22.0994	18.8495	27.2993	18.8495	18.8495
490	11.4833	16.8999	20.3666	22.4244	16.8996	22.4244	18.8495	26.9743	19.1745	18.8495
491	11.2666	16.6833	20.1499	22.7494	16.8996	22.0994	18.8495	26.3243	20.4745	19.1745
492	11.4833	16.8999	20.3666	22.4244	16.8996	22.0994	19.1745	26.9743	18.8495	19.1745
493	11.4833	16.6833	20.3666	22.0994	16.5746	22.0994	19.1745	26.9743	18.8495	18.5245
494	11.2666	16.8999	20.3666	22.4244	16.5746	22.0994	19.1745	27.2993	19.1745	18.5245
495	11.2666	16.6833	20.3666	22.0994	16.8996	22.4244	19.1745	26.6493	19.1745	18.8495
496	11.4833	16.6833	20.3666	22.4244	16.5746	22.4244	19.1745	26.9743	19.1745	18.8495
497	11.2666	16.8999	20.5833	22.0994	16.8996	22.0994	18.8495	26.9743	19.1745	18.8495
498	11.2666	16.6833	20.3666	22.4244	16.8996	22.4244	19.4995	26.6493	19.1745	18.5245
499	11.05	16.8999	20.3666	22.4244	16.8996	22.4244	19.1745	26.9743	18.8495	18.8495
500	11.2666	16.6833	20.1499	22.4244	16.5746	22.4244	19.1745	26.9743	19.1745	18.8495
501	11.4833	16.8999	20.3666	22.4244	16.5746	22.0994	19.1745	26.9743	18.8495	18.8495
502	10.8333	17.1166	20.3666	22.4244	16.2496	22.4244	19.1745	26.9743	19.4995	19.1745
503	11.05	17.1166	20.1499	22.4244	16.2496	22.0994	18.8495	26.6493	19.8245	19.1745
504	11.2666	16.6833	20.3666	22.4244	16.5746	22.4244	19.4995	26.9743	19.1745	18.5245
505	11.2666	16.6833	20.5833	22.4244	16.5746	22.7494	19.1745	26.6493	19.1745	19.1745
506	11.2666	17.1166	20.5833	22.4244	16.5746	22.4244	19.4995	26.9743	19.1745	18.8495
507	11.4833	16.8999	20.5833	22.4244	16.2496	22.4244	19.4995	26.6493	19.1745	18.8495
508	11.05	17.1166	20.1499	22.7494	16.5746	23.0744	19.4995	27.6243	19.4995	19.1745
509	11.05	17.1166	20.3666	22.7494	15.9246	21.7745	19.1745	26.9743	20.1495	19.1745
510	11.2666	16.8999	20.3666	22.4244	16.5746	22.0994	19.1745	27.2993	19.4995	18.8495
511	11.2666	17.1166	20.1499	22.7494	15.9246	23.0744	19.1745	27.6243	19.4995	18.8495
512	11.2666	17.1166	20.5833	22.4244	15.9246	22.0994	18.8495	26.9743	18.5245	18.8495
513	11.05	16.8999	20.3666	22.4244	15.9246	22.7494	19.4995	25.9994	18.8495	19.1745
514	11.2666	17.1166	20.5833	22.7494	15.5996	22.7494	19.1745	26.9743	18.5245	19.1745
515	11.05	16.8999	20.1499	22.7494	16.2496	22.7494	19.4995	26.3243	18.8495	18.8495
516	11.2666	16.8999	20.3666	22.4244	15.5996	23.0744	19.1745	26.9743	19.1745	18.8495
517	11.05	17.1166	20.1499	22.7494	15.9246	23.0744	18.8495	26.9743	18.5245	18.8495
518	11.05	17.1166	20.5833	22.4244	16.2496	23.0744	19.8245	26.6493	18.8495	18.8495
519	11.4833	17.1166	20.3666	22.4244	15.9246	22.4244	19.4995	26.9743	19.1745	18.8495
520	11.05	17.3333	20.1499	22.7494	15.9246	22.7494	19.4995	26.9743	18.1995	18.8495
521	11.2666	17.1166	20.1499	22.4244	16.2496	23.0744	19.1745	26.3243	18.8495	18.8495
522	11.2666	17.1166	20.3666	22.7494	15.9246	22.7494	18.8495	27.2993	19.4995	18.8495
523	11.05	17.1166	20.3666	22.4244	15.9246	22.0994	19.4995	27.2993	18.8495	18.8495
524	11.05	16.8999	20.3666	22.4244	15.5996	22.7494	19.4995	26.6493	19.1745	18.8495
525	11.2666	17.3333	20.1499	22.4244	15.9246	22.7494	19.4995	25.9994	19.1745	18.8495
526	11.05	17.1166	20.1499	22.4244	16.2496	21.7745	19.4995	27.2993	18.5245	18.8495
527	11.2666	16.8999	20.5833	22.4244	15.9246	22.0994	19.1745	26.6493	18.5245	19.1745
528	11.05	17.1166	20.5833	22.4244	15.9246	22.7494	19.1745	26.9743	19.1745	18.8495
529	11.05	16.8999	20.5833	22.4244	15.9246	22.0994	19.4995	26.9743	18.1995	19.1745
530	10.8333	17.3333	20.5833	22.4244	16.5746	22.4244	19.1745	26.9743	19.1745	18.8495
531	11.2666	17.3333	20.5833	22.4244	16.2496	22.7494	19.1745	26.6493	18.8495	19.1745
532	11.05	17.3333	20.7999	22.4244	16.5746	22.7494	19.1745	27.6243	18.8495	18.8495
533	11.2666	17.5499	21.0166	22.4244	16.2496	22.0994	19.1745	26.6493	19.4995	18.8495
534	11.2666	17.3333	20.5833	22.4244	15.9246	22.4244	19.1745	26.9743	18.8495	19.4995
535	11.2666	17.1166	20.5833	22.4244	16.2496	22.4244	19.4995	26.6493	18.8495	18.8495
536	11.05	17.5499	20.7999	22.7494	16.2496	22.0994	19.4995	27.6243	18.8495	18.5245
537	11.2666	17.3333	20.5833	22.4244	16.5746	22.4244	19.1745	27.2993	19.1745	18.8495
538	11.2666	17.5499	20.7999	22.7494	16.5746	22.4244	19.1745	26.6493	18.8495	18.8495
539	11.2666	17.1166	20.7999	22.7494	16.2496	22.4244	18.8495	26.9743	18.8495	19.1745
540	11.05	17.3333	20.5833	22.7494	15.9246	21.7745	19.1745	27.2993	18.8495	18.5245
541	11.2666	17.1166	20.5833	22.7494	16.2496	22.0994	19.1745	27.6243	18.8495	18.8495
542	11.7	16.8999	20.7999	22.7494	16.2496	22.4244	19.1745	27.2993	19.1745	19.1745
543	11.05	17.3333	20.7999	22.7494	16.2496	21.7745	19.4995	27.2993	19.1745	19.1745
544	11.4833	17.1166	20.5833	22.7494	16.5746	22.0994	19.4995	27.2993	19.1745	18.8495
545	11.4833	17.1166	20.7999	22.7494	16.2496	21.7745	19.4995	26.9743	19.1745	18.8495
546	11.2666	16.8999	20.7999	22.7494	16.2496	22.4244	18.8495	26.9743	19.1745	19.1745
547	11.2666	17.5499	20.7999	22.7494	15.9246	21.7745	19.1745	27.2993	19.1745	18.8495
548	11.2666	16.8999	20.7999	22.7494	15.9246	22.0994	19.1745	27.2993	19.8245	19.1745
549	10.6166	17.5499	20.7999	22.7494	15.9246	21.7745	19.1745	26.9743	19.4995	18.8495
550	11.05	17.1166	20.7999	22.7494	16.2496	21.4495	19.4995	27.2993	19.8245	19.1745
551	11.05	17.1166	20.7999	22.7494	16.2496	21.1245	19.4995	27.2993	19.8245	19.1745
552	11.05	17.3333	20.7999	22.7494	15.9246	22.0994	19.4995	26.9743	19.1745	19.1745
553	11.4833	17.1166	20.7999	22.7494	15.9246	22.0994	19.8245	27.2993	19.1745	19.1745
554	11.05	17.7666	20.7999	22.7494	16.2496	22.0994	19.8245	27.6243	18.8495	19.1745
555	11.2666	17.1166	20.7999	22.7494	16.2496	22.0994	19.4995	26.9743	19.4995	18.8495
556	10.8333	17.3333	20.3666	22.7494	15.9246	22.0994	19.4995	27.2993	18.5245	19.1745
557	10.8333	16.8999	20.7999	22.7494	15.9246	22.0994	19.1745	26.6493	19.8245	18.8495
558	10.4	17.1166	20.5833	22.7494	16.2496	22.0994	19.4995	26.9743	19.1745	18.5245
559	10.8333	17.3333	20.7999	22.7494	15.9246	22.0994	20.1495	27.2993	19.4995	18.5245
560	11.2666	17.1166	20.5833	22.7494	16.2496	22.0994	19.4995	26.9743	19.8245	18.5245
561	10.6166	17.1166	20.7999	22.7494	15.9246	21.7745	19.1745	27.2993	19.4995	18.5245
562	10.8333	17.3333	20.7999	22.7494	15.9246	21.4495	19.8245	27.2993	19.1745	18.8495
563	10.8333	17.5499	20.7999	22.7494	15.9246	22.0994	19.4995	27.2993	19.1745	18.8495
564	10.8333	16.8999	20.7999	22.7494	15.9246	22.4244	20.1495	27.2993	19.1745	18.8495
565	11.05	16.8999	20.7999	22.7494	15.9246	22.0994	19.1745	27.6243	19.4995	18.5245
566	10.6166	17.7666	20.7999	22.7494	15.9246	22.0994	19.4995	27.6243	20.1495	18.5245
567	10.4	17.1166	20.7999	22.7494	15.9246	22.0994	19.4995	27.6243	19.1745	18.1995
568	10.8333	16.8999	20.7999	22.7494	16.2496	22.0994	19.1745	26.9743	19.4995	18.5245
569	11.05	16.8999	20.5833	22.7494	16.2496	21.7745	19.4995	25.9994	19.4995	18.5245
570	10.8333	17.1166	20.7999	22.7494	16.2496	22.0994	19.4995	26.6493	19.1745	18.5245
571	10.8333	16.8999	20.7999	22.7494	16.2496	22.0994	19.8245	26.9743	19.1745	18.8495
572	11.05	17.1166	20.7999	22.7494	16.2496	21.7745	19.1745	26.9743	19.1745	18.5245
573	11.05	16.8999	20.7999	22.7494	15.9246	22.4244	19.4995	26.6493	19.1745	18.1995
574	10.8333	17.5499	20.7999	22.7494	15.9246	22.0994	19.4995	27.2993	19.8245	19.1745
575	11.05	17.1166	20.7999	22.7494	16.2496	21.7745	19.1745	27.2993	19.8245	18.8495
576	11.05	16.8999	20.7999	23.0744	15.9246	22.0994	19.8245	26.3243	19.4995	18.8495
577	11.05	16.8999	20.7999	22.7494	16.2496	22.0994	19.4995	26.6493	19.8245	18.8495
578	11.2666	17.1166	21.0166	22.7494	16.5746	22.0994	19.4995	26.9743	19.8245	18.1995
579	10.6166	17.1166	20.7999	22.7494	16.5746	22.0994	19.1745	26.9743	19.4995	18.5245
580	10.8333	17.3333	21.0166	22.7494	16.5746	22.0994	19.8245	26.9743	19.1745	18.1995
581	11.05	17.1166	21.0166	22.7494	16.2496	22.0994	19.8245	26.9743	19.1745	18.5245
582	11.05	17.1166	20.7999	22.7494	16.5746	22.0994	19.4995	27.2993	19.1745	18.5245
583	11.05	17.1166	20.7999	22.7494	16.5746	21.7745	19.4995	27.2993	19.8245	19.1745
584	11.05	17.1166	20.7999	22.7494	16.2496	22.0994	19.4995	26.6493	19.4995	18.8495
585	10.6166	16.8999	20.7999	22.7494	16.5746	21.7745	19.8245	26.9743	19.4995	18.8495
586	11.05	17.3333	20.5833	22.7494	15.9246	22.0994	19.4995	27.2993	19.4995	18.8495
587	10.8333	17.1166	20.7999	22.7494	15.9246	22.4244	19.8245	27.2993	19.8245	18.5245
588	10.8333	16.8999	21.0166	22.7494	15.9246	22.4244	19.4995	27.2993	19.8245	18.8495
589	11.05	17.1166	20.5833	22.7494	15.9246	22.0994	19.4995	27.2993	19.4995	18.8495
590	10.8333	17.1166	20.7999	22.7494	15.9246	22.4244	19.4995	27.9493	19.4995	18.1995
591	11.2666	16.8999	21.0166	22.7494	15.9246	22.4244	19.1745	26.9743	19.4995	18.5245
592	11.2666	17.1166	21.0166	22.7494	16.2496	22.0994	19.4995	27.6243	19.4995	18.8495
593	11.05	17.1166	21.4499	22.7494	16.2496	22.4244	19.8245	26.6493	19.8245	18.5245
594	11.2666	16.8999	20.7999	22.7494	16.2496	21.7745	19.4995	27.6243	19.1745	18.1995
595	10.8333	16.8999	21.2333	22.7494	16.2496	22.0994	19.4995	27.6243	19.4995	18.5245
596	11.2666	17.1166	20.7999	22.7494	16.2496	21.7745	19.1745	26.6493	18.8495	18.8495
597	11.4833	16.8999	21.0166	22.7494	16.2496	22.4244	19.1745	26.9743	19.4995	18.5245
598	11.05	16.8999	21.0166	22.7494	15.9246	22.4244	19.4995	27.9493	19.8245	18.8495
599	11.2666	17.1166	21.0166	22.7494	16.2496	21.4495	19.8245	26.9743	19.8245	18.5245
600	11.05	17.1166	20.7999	23.0744	15.9246	21.7745	18.8495	27.2993	19.4995	18.1995
601	11.05	17.1166	20.7999	22.7494	16.2496	22.0994	19.1745	27.2993	19.4995	18.8495
602	10.8333	17.1166	21.2333	22.7494	16.2496	21.7745	19.8245	27.6243	19.4995	18.5245
603	11.05	16.8999	21.2333	22.7494	15.9246	22.0994	19.4995	27.2993	19.1745	18.8495
604	11.05	17.1166	20.7999	22.7494	16.2496	22.0994	19.4995	27.2993	19.8245	18.5245
605	11.05	17.1166	20.7999	22.7494	16.2496	22.4244	19.8245	27.2993	19.8245	18.5245
606	11.05	16.8999	21.4499	22.7494	15.9246	22.4244	19.4995	26.9743	19.1745	18.5245
607	10.6166	16.8999	21.0166	22.7494	16.2496	22.7494	19.4995	26.9743	19.4995	18.5245
608	11.05	16.8999	21.4499	22.7494	16.2496	22.4244	19.8245	26.6493	19.8245	18.5245
609	10.8333	17.1166	21.0166	22.7494	16.5746	22.0994	19.8245	27.2993	19.8245	18.5245
610	10.8333	17.1166	20.7999	22.7494	16.2496	22.4244	19.4995	27.2993	20.1495	18.5245
611	10.6166	16.8999	20.7999	22.7494	16.2496	21.7745	19.8245	26.6493	19.8245	18.5245
612	11.05	17.1166	21.2333	22.7494	16.8996	21.7745	19.1745	26.9743	19.4995	18.1995
613	11.2666	17.1166	21.0166	23.0744	16.5746	21.7745	19.4995	26.9743	19.4995	18.5245
614	10.6166	17.1166	21.0166	22.7494	16.5746	22.4244	19.8245	26.9743	19.4995	18.5245
615	11.05	16.8999	20.7999	22.7494	16.5746	22.4244	19.1745	27.6243	19.4995	18.5245
616	10.8333	17.1166	20.5833	22.7494	16.5746	22.4244	19.4995	27.2993	19.4995	19.1745
617	10.8333	17.3333	20.5833	23.0744	16.5746	22.0994	20.1495	26.9743	19.8245	18.8495
618	11.05	17.1166	21.0166	22.7494	16.2496	22.0994	19.1745	27.2993	19.8245	18.8495
619	10.6166	17.1166	21.0166	22.7494	16.5746	22.0994	19.4995	26.6493	19.4995	18.5245
620	11.05	17.1166	21.0166	22.7494	16.5746	21.7745	19.8245	26.9743	19.8245	18.5245
621	11.05	17.1166	20.7999	22.7494	16.8996	22.0994	19.4995	26.9743	19.4995	18.5245
622	10.8333	16.8999	20.7999	23.0744	15.9246	22.4244	19.1745	27.2993	19.8245	18.8495
623	10.4	17.1166	21.0166	22.7494	16.2496	22.4244	19.4995	27.6243	19.8245	18.1995
624	10.8333	17.1166	20.7999	22.7494	16.5746	22.0994	19.1745	26.9743	19.8245	18.5245
625	10.6166	17.1166	20.5833	22.7494	16.5746	22.0994	19.4995	26.6493	19.4995	18.5245
626	11.05	16.8999	20.7999	22.7494	16.5746	22.4244	19.8245	26.6493	19.1745	18.5245
627	10.6166	17.1166	20.5833	22.7494	16.2496	22.0994	19.4995	27.2993	19.1745	19.1745
628	11.05	16.8999	21.2333	22.7494	16.5746	22.0994	19.4995	27.2993	19.4995	18.5245
629	10.8333	16.8999	20.7999	23.0744	16.5746	22.4244	20.1495	27.6243	19.4995	18.5245
630	11.4833	16.8999	20.7999	22.7494	16.2496	22.7494	19.8245	27.6243	19.8245	19.1745
631	10.8333	17.1166	21.2333	22.7494	16.2496	22.4244	19.8245	27.6243	19.4995	18.8495
632	11.05	16.8999	21.2333	22.7494	16.2496	22.0994	19.4995	27.2993	19.1745	18.8495
633	11.05	16.8999	20.7999	23.0744	15.9246	22.0994	19.4995	27.2993	18.8495	19.4995
634	10.4	17.1166	20.7999	22.7494	16.2496	22.4244	19.4995	27.2993	19.8245	19.8245
635	10.8333	17.3333	20.5833	22.7494	15.9246	22.0994	19.4995	27.6243	19.4995	19.8245
636	10.6166	17.1166	21.2333	22.7494	15.9246	22.4244	19.4995	27.6243	20.1495	18.8495
637	11.05	16.8999	20.7999	22.7494	16.8996	22.0994	19.1745	26.9743	19.8245	19.1745
638	11.05	17.1166	21.0166	22.7494	16.2496	22.0994	19.4995	26.9743	19.1745	18.8495
639	10.8333	16.8999	20.7999	23.0744	16.2496	22.4244	19.8245	26.3243	19.1745	18.5245
640	11.05	17.1166	20.5833	22.7494	16.2496	22.0994	19.8245	26.6493	19.8245	18.8495
641	11.05	16.8999	20.7999	22.7494	16.2496	22.0994	19.1745	27.6243	19.4995	19.1745
642	10.8333	16.8999	20.5833	23.0744	16.2496	22.4244	19.8245	26.6493	19.1745	19.1745
643	10.8333	16.8999	20.7999	22.7494	15.9246	22.4244	20.1495	27.6243	19.1745	19.1745
644	11.05	16.8999	20.5833	22.7494	15.9246	22.4244	19.1745	26.9743	19.4995	18.8495
645	10.8333	16.8999	21.0166	23.0744	15.9246	22.4244	19.8245	27.6243	19.8245	19.1745
646	10.4	17.1166	20.5833	22.7494	15.9246	22.0994	19.8245	27.6243	19.8245	19.1745
647	11.05	17.1166	20.7999	22.7494	15.9246	22.4244	19.8245	26.9743	19.8245	19.1745
648	11.05	16.8999	20.5833	22.7494	15.5996	22.0994	19.8245	26.9743	19.4995	19.4995
649	11.05	16.8999	20.7999	23.0744	16.2496	22.0994	20.1495	26.9743	19.4995	19.1745
650	11.05	16.8999	21.0166	22.7494	16.2496	22.0994	19.4995	27.9493	19.4995	19.4995
651	11.05	17.1166	20.7999	23.0744	15.9246	22.0994	20.1495	27.6243	18.8495	19.4995
652	10.8333	17.1166	20.7999	23.0744	15.9246	21.7745	19.8245	27.2993	19.8245	19.1745
653	11.05	16.6833	21.2333	23.3994	15.9246	21.7745	19.4995	26.9743	19.1745	18.8495
654	10.6166	16.8999	21.0166	23.0744	15.9246	21.7745	19.4995	27.2993	19.4995	19.1745
655	11.05	16.4666	20.7999	22.7494	15.2746	22.7494	19.8245	27.2993	19.4995	18.5245
656	11.05	16.8999	20.7999	22.7494	15.9246	22.4244	19.8245	27.9493	19.8245	18.8495
657	10.8333	16.8999	20.5833	23.0744	15.9246	22.0994	19.4995	27.6243	19.4995	19.1745
658	10.8333	17.1166	20.5833	22.7494	15.9246	22.0994	19.8245	27.2993	19.8245	19.4995
659	10.8333	16.4666	20.7999	22.7494	15.9246	22.7494	19.4995	26.3243	19.4995	19.1745
660	11.05	16.4666	20.5833	22.7494	15.9246	22.0994	19.4995	26.9743	20.4745	19.4995
661	11.4833	16.6833	20.3666	23.0744	15.9246	22.4244	19.8245	27.9493	19.8245	19.1745
662	11.05	16.6833	20.7999	23.0744	16.2496	22.0994	19.1745	27.6243	19.8245	19.1745
663	10.8333	16.8999	20.7999	23.0744	16.2496	22.0994	19.8245	27.2993	19.8245	19.4995
664	10.8333	16.6833	20.5833	23.0744	15.9246	22.0994	20.1495	27.2993	19.4995	19.4995
665	11.05	16.6833	20.7999	23.0744	15.9246	22.0994	19.8245	27.6243	19.4995	19.1745
666	10.8333	16.8999	20.7999	22.7494	16.2496	22.0994	19.8245	27.2993	19.8245	19.1745
667	10.6166	16.6833	21.0166	22.7494	15.9246	22.0994	19.4995	27.6243	19.8245	19.8245
668	10.8333	16.6833	20.7999	22.7494	15.9246	22.0994	19.4995	27.6243	19.8245	19.4995
669	10.4	16.8999	20.7999	22.7494	15.9246	22.0994	19.1745	27.2993	19.4995	18.8495
670	10.8333	17.1166	20.5833	23.0744	15.9246	21.7745	19.8245	27.6243	19.1745	19.8245
671	10.6166	16.8999	20.5833	23.0744	15.5996	22.0994	19.4995	27.9493	19.1745	19.4995
672	11.05	16.6833	20.5833	23.0744	15.9246	22.0994	19.4995	27.9493	19.8245	19.4995
673	10.6166	16.6833	20.5833	23.0744	15.9246	22.0994	20.1495	27.6243	19.8245	19.4995
674	10.8333	16.8999	20.5833	23.0744	15.9246	22.0994	19.8245	27.2993	19.8245	19.1745
675	11.05	16.6833	20.5833	22.7494	15.5996	22.0994	19.4995	27.9493	19.4995	19.1745
676	10.8333	16.8999	20.5833	23.0744	15.5996	22.0994	19.4995	26.6493	20.4745	19.4995
677	10.6166	16.8999	21.0166	22.7494	15.9246	22.4244	19.8245	26.9743	20.4745	19.1745
678	11.05	16.8999	20.5833	23.0744	15.5996	22.0994	20.1495	28.2743	19.4995	19.1745
679	10.8333	16.8999	20.5833	23.0744	16.2496	22.0994	19.4995	27.2993	19.8245	19.1745
680	11.05	16.6833	20.3666	22.7494	16.2496	22.4244	19.4995	27.2993	19.4995	19.1745
681	11.05	16.6833	21.0166	23.0744	15.5996	22.4244	19.4995	26.3243	19.8245	19.8245
682	10.8333	16.6833	20.7999	23.0744	16.2496	22.0994	19.8245	26.9743	19.8245	19.4995
683	10.8333	16.6833	20.7999	23.0744	15.5996	22.0994	19.8245	27.6243	19.8245	19.4995
684	11.05	16.6833	20.7999	23.0744	15.9246	22.4244	19.4995	27.6243	19.4995	19.1745
685	10.8333	16.6833	21.0166	23.0744	16.2496	22.4244	19.8245	27.9493	19.4995	19.4995
686	11.05	16.8999	20.7999	22.7494	15.5996	22.4244	19.8245	27.9493	19.8245	18.8495
687	10.8333	16.6833	20.7999	22.7494	15.5996	22.0994	20.1495	27.2993	19.4995	19.1745
688	11.05	16.6833	20.7999	23.0744	15.9246	22.0994	19.4995	27.2993	19.8245	18.8495
689	11.2666	16.8999	20.7999	23.0744	15.9246	22.4244	19.8245	27.2993	19.8245	19.1745
690	10.6166	16.2499	20.7999	23.0744	15.5996	22.0994	20.1495	27.2993	19.4995	19.1745
691	10.8333	16.6833	20.7999	23.0744	15.9246	21.7745	19.8245	27.9493	19.4995	19.1745
692	10.8333	16.6833	20.5833	23.0744	16.2496	22.4244	19.4995	27.6243	19.4995	19.4995
693	11.2666	17.1166	20.7999	23.0744	15.9246	22.0994	19.1745	27.6243	19.8245	19.4995
694	10.8333	16.6833	20.7999	22.7494	15.5996	22.0994	19.8245	26.6493	20.1495	19.1745
695	10.8333	16.8999	20.7999	23.0744	15.5996	22.0994	19.8245	26.9743	19.4995	19.1745
696	10.6166	16.6833	20.7999	22.7494	15.2746	22.0994	20.1495	27.2993	19.4995	18.8495
697	10.8333	16.6833	21.0166	23.0744	15.5996	22.0994	19.4995	27.2993	19.8245	19.1745
698	10.6166	16.8999	20.5833	23.0744	16.2496	22.0994	19.8245	27.6243	19.4995	19.1745
699	11.05	16.8999	21.0166	22.7494	14.9496	22.0994	19.4995	26.9743	19.4995	19.1745
700	11.05	16.8999	21.0166	23.0744	14.9496	22.0994	20.1495	27.2993	19.1745	19.1745
701	10.8333	16.8999	20.7999	22.7494	15.2746	22.0994	19.4995	27.6243	19.8245	19.1745
702	10.8333	16.8999	20.7999	23.0744	15.5996	22.0994	19.8245	27.6243	19.4995	18.8495
703	10.8333	16.8999	20.7999	23.0744	15.2746	22.4244	20.1495	27.6243	19.1745	19.1745
704	10.6166	16.8999	20.7999	22.7494	14.9496	22.0994	19.8245	27.6243	19.4995	19.1745
705	10.6166	16.8999	21.0166	23.0744	14.9496	22.0994	20.1495	27.6243	19.4995	19.1745
706	10.6166	17.1166	20.7999	23.0744	15.2746	22.0994	19.4995	27.6243	19.8245	19.1745
707	10.8333	16.8999	21.0166	23.0744	14.9496	22.4244	20.1495	27.2993	19.4995	19.1745
708	10.8333	16.6833	20.7999	23.0744	14.9496	22.4244	19.8245	27.6243	19.8245	19.4995
709	11.05	16.6833	20.7999	22.7494	16.2496	22.4244	19.8245	27.6243	19.8245	19.1745
710	10.6166	16.6833	21.0166	22.7494	15.2746	22.4244	19.8245	27.6243	19.8245	19.1745
711	11.05	16.6833	21.0166	23.0744	15.2746	22.7494	19.8245	27.6243	20.1495	19.1745
712	11.05	16.6833	21.0166	23.0744	15.5996	22.0994	19.8245	28.2743	20.1495	19.4995
713	11.2666	16.8999	21.0166	23.0744	15.9246	22.0994	20.1495	27.2993	19.4995	19.1745
714	10.8333	16.8999	20.7999	22.7494	15.5996	22.4244	19.8245	27.6243	19.8245	19.8245
715	11.05	17.3333	21.0166	23.0744	15.5996	21.7745	19.8245	27.9493	20.1495	19.4995
716	10.8333	16.8999	20.7999	22.7494	15.5996	22.0994	19.8245	27.2993	19.4995	19.4995
717	10.6166	16.8999	21.0166	22.7494	15.5996	22.4244	20.1495	27.2993	20.1495	19.4995
718	11.05	16.6833	21.0166	23.0744	15.9246	22.0994	20.1495	27.2993	19.4995	19.4995
719	10.8333	17.3333	20.7999	23.0744	15.9246	21.7745	19.8245	27.6243	20.1495	19.4995
720	11.05	16.8999	21.0166	22.7494	15.5996	22.4244	19.8245	27.6243	19.8245	19.4995
721	10.6166	16.8999	20.7999	23.0744	16.2496	22.0994	20.1495	27.2993	19.4995	19.4995
722	10.6166	16.6833	21.0166	22.7494	16.2496	22.4244	20.1495	27.6243	19.8245	19.4995
723	10.8333	16.6833	20.7999	23.0744	16.2496	22.0994	20.1495	27.9493	19.8245	19.4995
724	11.05	16.6833	21.0166	22.7494	15.9246	21.7745	19.8245	27.6243	19.4995	19.4995
725	10.8333	16.8999	21.0166	23.0744	15.9246	22.4244	19.8245	27.6243	19.8245	19.4995
726	11.05	17.1166	21.0166	22.7494	16.2496	22.0994	19.4995	27.9493	19.4995	19.4995
727	10.8333	16.8999	21.0166	23.0744	15.9246	22.0994	20.1495	27.9493	20.1495	19.4995
728	10.8333	16.6833	21.0166	22.7494	15.9246	22.0994	19.8245	27.6243	20.1495	19.1745
729	10.8333	16.6833	21.0166	23.0744	16.2496	22.0994	20.1495	27.2993	19.4995	19.1745
730	10.8333	16.8999	21.0166	23.0744	15.5996	22.0994	19.8245	27.9493	20.1495	19.1745
731	11.05	16.8999	21.0166	23.0744	15.5996	22.0994	19.8245	27.6243	20.1495	19.1745
732	10.6166	16.8999	21.0166	23.0744	15.9246	22.4244	20.1495	27.9493	19.4995	19.1745
733	10.4	16.4666	21.0166	23.0744	15.5996	22.0994	19.8245	27.6243	19.8245	19.1745
734	10.6166	16.4666	21.0166	22.7494	15.9246	22.7494	20.1495	27.2993	19.4995	19.4995
735	10.6166	16.4666	21.0166	23.0744	16.2496	22.0994	19.8245	27.9493	20.1495	19.4995
736	11.2666	16.6833	21.0166	22.7494	15.9246	22.4244	19.8245	27.6243	20.7995	19.4995
737	10.8333	16.8999	21.0166	23.0744	16.2496	22.4244	19.8245	27.6243	19.8245	19.4995
738	10.6166	16.6833	21.0166	22.7494	15.9246	22.0994	19.4995	27.2993	20.1495	19.1745
739	10.6166	16.6833	21.0166	23.0744	15.9246	21.7745	19.8245	27.9493	19.4995	19.4995
740	10.4	16.6833	21.0166	22.7494	15.9246	22.0994	20.1495	27.9493	20.1495	19.4995
741	10.8333	16.8999	21.0166	23.0744	16.2496	21.7745	20.1495	27.9493	19.4995	19.4995
742	10.6166	17.1166	21.0166	23.0744	15.9246	22.4244	20.4745	27.6243	19.8245	19.4995
743	10.8333	16.6833	21.0166	22.7494	15.9246	22.0994	19.8245	27.9493	20.1495	19.1745
744	10.8333	16.4666	21.2333	23.0744	15.5996	22.4244	19.8245	28.2743	20.1495	19.1745
745	10.8333	16.8999	21.0166	23.0744	15.9246	21.7745	19.8245	27.6243	19.4995	19.4995
746	10.6166	16.6833	21.0166	23.0744	15.9246	22.4244	19.8245	26.6493	19.4995	19.4995
747	10.6166	16.8999	21.0166	22.7494	16.2496	22.0994	19.8245	27.2993	19.8245	19.4995
748	11.05	16.8999	21.0166	22.7494	16.2496	22.7494	20.1495	27.2993	19.4995	19.4995
749	11.05	16.6833	21.4499	22.7494	16.2496	22.0994	19.8245	27.6243	19.8245	19.4995
750	10.4	16.6833	21.0166	22.7494	15.9246	22.0994	20.1495	26.6493	20.1495	19.4995
751	11.05	16.8999	21.0166	22.7494	15.9246	22.0994	19.8245	27.2993	20.1495	19.4995
752	11.05	16.6833	21.0166	22.7494	16.2496	21.7745	20.1495	27.2993	20.1495	19.4995
753	10.4	16.6833	21.2333	22.7494	16.2496	22.0994	20.1495	27.2993	20.1495	19.1745
754	10.8333	16.8999	21.0166	22.4244	15.9246	21.4495	19.8245	27.6243	20.1495	19.4995
755	10.8333	16.6833	21.0166	22.7494	16.2496	22.0994	19.4995	27.2993	20.1495	19.4995
756	10.6166	16.4666	21.0166	22.7494	15.9246	22.0994	20.1495	27.6243	19.8245	19.1745
757	11.05	16.2499	21.0166	22.7494	16.2496	21.7745	19.8245	27.6243	19.8245	19.8245
758	10.8333	16.4666	21.0166	22.7494	16.2496	22.0994	19.8245	27.2993	19.8245	19.4995
759	10.8333	16.6833	21.0166	22.7494	16.5746	22.0994	20.1495	27.2993	19.8245	19.4995
760	10.8333	16.6833	21.0166	22.7494	16.2496	21.7745	19.8245	27.6243	19.8245	19.4995
761	10.8333	16.8999	21.2333	22.4244	16.2496	22.4244	19.8245	27.2993	19.4995	19.1745
762	10.8333	16.4666	21.0166	22.4244	16.5746	22.0994	19.8245	27.6243	20.1495	19.4995
763	11.05	16.4666	21.2333	22.7494	16.2496	22.4244	20.1495	27.2993	19.4995	19.1745
764	10.6166	16.4666	21.0166	22.7494	15.9246	22.0994	19.8245	27.6243	19.4995	19.4995
765	11.05	16.6833	21.2333	22.7494	16.2496	21.7745	20.1495	27.6243	20.1495	19.8245
766	10.4	16.4666	21.0166	22.4244	15.9246	21.7745	19.8245	27.6243	20.1495	19.1745
767	10.8333	16.6833	21.0166	22.7494	15.9246	22.0994	20.1495	27.2993	19.8245	19.1745
768	10.6166	16.4666	21.0166	22.7494	15.5996	22.0994	19.8245	26.9743	20.1495	19.4995
769	11.05	16.4666	21.0166	22.7494	15.9246	22.0994	19.8245	27.2993	19.8245	19.4995
770	10.4	16.6833	21.0166	22.7494	16.2496	21.7745	20.1495	27.6243	20.1495	19.4995
771	10.6166	16.4666	21.2333	22.7494	15.9246	22.0994	19.8245	27.9493	19.8245	19.8245
772	10.6166	16.8999	21.0166	22.7494	16.2496	22.0994	19.8245	27.9493	19.8245	19.8245
773	10.4	16.6833	21.0166	22.4244	15.9246	22.0994	19.4995	27.9493	19.8245	19.4995
774	10.8333	16.6833	21.2333	22.7494	15.9246	22.0994	20.1495	27.2993	20.1495	19.4995
775	11.2666	16.4666	21.0166	22.4244	16.2496	22.0994	20.1495	27.2993	19.4995	19.4995
776	10.8333	16.4666	21.2333	22.4244	16.2496	22.0994	19.8245	27.6243	19.8245	19.4995
777	11.05	16.2499	21.0166	22.4244	16.2496	22.0994	19.4995	27.6243	19.4995	19.1745
778	11.05	16.8999	21.0166	22.7494	16.2496	22.0994	19.1745	26.9743	19.8245	19.4995
779	11.05	16.6833	21.0166	22.7494	16.2496	22.0994	19.1745	27.6243	19.4995	19.1745
780	10.8333	16.4666	21.0166	22.7494	15.9246	22.0994	19.1745	27.9493	19.8245	19.4995
781	10.6166	16.6833	21.0166	22.7494	16.2496	21.7745	19.1745	28.2743	19.8245	19.4995
782	11.05	16.4666	20.7999	22.7494	16.2496	21.7745	19.1745	27.6243	19.1745	19.4995
783	10.8333	16.4666	21.0166	22.7494	16.2496	22.0994	18.8495	27.2993	19.1745	19.1745
784	10.6166	16.8999	21.0166	22.4244	16.8996	22.0994	19.1745	27.6243	19.8245	19.4995
785	10.8333	17.1166	21.0166	22.7494	16.2496	21.7745	19.1745	27.9493	18.8495	19.1745
786	10.8333	16.8999	21.0166	22.7494	16.2496	22.4244	19.4995	27.2993	19.8245	19.1745
787	10.6166	16.6833	20.7999	22.7494	16.2496	22.0994	18.8495	27.6243	19.8245	19.1745
788	10.4	16.8999	21.0166	22.7494	16.5746	22.0994	19.4995	27.2993	19.8245	19.4995
789	10.6166	16.8999	21.0166	22.7494	16.5746	22.4244	19.8245	26.9743	19.8245	19.1745
790	10.4	16.6833	21.2333	22.4244	16.8996	22.0994	20.1495	27.2993	19.8245	19.4995
791	10.1833	16.4666	21.0166	22.4244	16.2496	22.4244	19.8245	26.9743	20.1495	19.4995
792	10.6166	16.4666	21.2333	22.4244	16.8996	22.0994	19.8245	27.2993	19.4995	19.4995
793	10.4	16.6833	21.0166	22.7494	16.8996	21.7745	19.8245	27.2993	19.8245	19.1745
794	10.6166	16.8999	21.0166	22.7494	16.8996	22.0994	20.4745	27.2993	19.1745	19.4995
795	10.6166	16.6833	21.0166	22.7494	16.5746	22.4244	20.1495	27.6243	19.8245	19.4995
796	11.05	16.4666	21.0166	22.4244	16.8996	21.7745	19.8245	27.2993	19.4995	19.4995
797	10.6166	16.6833	21.0166	22.7494	16.5746	21.7745	19.8245	26.9743	19.4995	19.4995
798	11.05	16.6833	21.2333	22.7494	16.5746	22.0994	20.7995	27.2993	19.4995	19.1745
799	10.6166	16.6833	21.0166	22.7494	16.2496	22.0994	20.1495	27.2993	19.4995	19.4995
800	10.6166	16.8999	21.0166	22.7494	16.5746	22.4244	20.7995	27.2993	19.8245	19.4995
801	10.4	16.4666	21.0166	22.4244	16.8996	22.0994	20.1495	27.6243	19.4995	19.4995
802	10.6166	16.6833	21.2333	22.4244	16.8996	22.4244	20.4745	27.6243	19.4995	19.4995
803	10.4	16.8999	21.0166	22.4244	16.8996	22.4244	20.1495	27.6243	19.8245	19.4995
804	10.6166	16.6833	21.2333	22.7494	16.5746	22.0994	20.4745	27.2993	19.8245	19.4995
805	10.8333	16.6833	21.0166	22.7494	16.5746	22.0994	19.8245	27.2993	19.4995	19.1745
806	10.6166	16.6833	21.2333	22.7494	16.8996	22.7494	20.4745	26.9743	19.1745	19.4995
807	10.4	16.6833	20.7999	22.7494	16.8996	22.0994	20.4745	27.2993	19.8245	19.1745
808	10.4	16.2499	20.7999	22.7494	16.8996	22.0994	20.1495	27.2993	20.1495	19.1745
809	10.6166	16.6833	20.7999	22.7494	16.8996	22.7494	20.1495	26.9743	19.8245	19.1745
810	10.6166	16.4666	20.7999	22.4244	16.8996	22.4244	20.4745	27.6243	19.8245	19.4995
811	10.6166	16.6833	21.0166	22.4244	16.8996	22.4244	20.1495	26.6493	19.8245	19.1745
812	10.4	16.4666	21.0166	22.4244	16.8996	22.4244	19.8245	26.9743	19.4995	18.8495
813	10.6166	16.4666	21.0166	22.4244	17.2246	22.4244	20.7995	26.9743	19.8245	18.8495
814	10.4	16.4666	21.2333	22.4244	16.2496	22.4244	19.8245	26.9743	19.4995	19.1745
815	10.6166	16.8999	21.2333	22.4244	16.8996	22.0994	19.8245	27.6243	19.4995	19.4995
816	10.1833	16.6833	21.0166	22.7494	16.8996	22.0994	20.1495	27.9493	19.4995	19.4995
817	10.1833	16.4666	21.0166	22.7494	16.8996	22.0994	20.1495	27.6243	20.1495	19.1745
818	10.4	16.6833	21.2333	22.4244	16.2496	22.4244	20.4745	27.2993	20.4745	19.1745
819	10.8333	16.4666	21.0166	22.4244	16.8996	22.4244	19.8245	27.2993	19.8245	19.1745
820	10.4	16.4666	21.0166	22.4244	16.5746	22.4244	20.1495	27.2993	19.4995	19.8245
821	9.74997	16.2499	21.0166	22.4244	16.8996	22.4244	20.4745	27.2993	19.4995	19.1745
822	10.4	16.4666	21.2333	22.4244	16.8996	22.4244	20.4745	27.2993	19.1745	19.4995
823	10.4	16.4666	21.0166	22.4244	17.2246	22.4244	20.4745	27.6243	19.8245	19.1745
824	10.6166	16.2499	21.2333	22.4244	16.8996	22.4244	19.8245	27.6243	19.8245	19.4995
825	10.6166	16.4666	21.2333	22.4244	16.5746	22.4244	19.8245	27.6243	19.8245	19.8245
826	10.4	16.2499	21.2333	22.7494	16.8996	22.4244	20.4745	27.2993	19.8245	19.1745
827	10.1833	16.4666	21.2333	22.4244	16.8996	22.7494	20.1495	26.9743	19.4995	19.1745
828	10.4	16.2499	21.0166	22.4244	17.2246	22.4244	20.1495	26.9743	19.4995	19.4995
829	10.4	16.4666	21.0166	22.7494	16.8996	22.4244	20.1495	26.9743	19.1745	19.4995
830	10.4	16.2499	21.2333	22.7494	16.8996	22.7494	20.4745	27.2993	19.1745	19.4995
831	10.1833	16.2499	21.0166	22.7494	16.8996	22.7494	19.8245	27.2993	19.4995	19.1745
832	10.4	16.6833	21.2333	22.7494	16.8996	22.7494	20.4745	27.6243	19.4995	19.4995
833	10.4	16.2499	21.2333	22.7494	16.8996	22.0994	20.7995	26.9743	19.1745	19.4995
834	10.1833	16.6833	21.2333	22.4244	16.8996	22.4244	20.1495	27.6243	19.1745	19.4995
835	10.4	16.6833	21.0166	22.4244	16.8996	22.4244	20.4745	27.2993	19.4995	19.4995
836	10.8333	16.8999	21.2333	22.4244	16.8996	22.4244	19.8245	27.6243	19.1745	19.4995
837	10.1833	16.8999	21.2333	22.4244	16.8996	22.4244	20.4745	27.2993	19.8245	19.1745
838	10.6166	16.8999	21.2333	22.4244	16.8996	22.4244	20.4745	27.9493	19.1745	19.4995
839	10.4	16.4666	21.4499	22.4244	16.8996	22.7494	20.4745	27.2993	19.8245	19.8245
840	10.4	16.6833	21.4499	22.4244	16.8996	22.7494	20.7995	26.6493	19.8245	19.8245
841	10.6166	16.6833	21.4499	22.4244	16.8996	22.7494	20.1495	27.2993	19.4995	20.1495
842	10.6166	16.4666	21.4499	22.4244	16.8996	22.4244	20.4745	27.2993	19.4995	19.8245
843	10.4	16.4666	21.4499	22.4244	16.8996	23.0744	20.1495	27.6243	19.4995	19.8245
844	10.6166	16.8999	21.2333	22.4244	16.8996	22.4244	20.4745	27.6243	19.4995	19.8245
845	9.96663	16.6833	21.2333	22.4244	16.8996	22.4244	20.4745	27.9493	19.1745	19.4995
846	10.6166	16.4666	21.4499	22.4244	16.8996	22.7494	20.4745	27.2993	19.4995	19.8245
847	10.6166	16.6833	21.6666	22.4244	16.8996	22.4244	20.1495	27.2993	19.4995	19.1745
848	10.4	16.8999	21.6666	22.7494	16.8996	22.7494	20.4745	26.9743	19.4995	19.4995
849	10.6166	16.6833	21.6666	22.4244	16.8996	22.7494	20.4745	27.2993	19.8245	19.4995
850	10.1833	16.6833	21.0166	22.4244	16.5746	22.7494	20.4745	27.6243	20.1495	19.4995
851	10.1833	16.8999	21.4499	22.4244	16.8996	22.7494	20.1495	27.6243	19.4995	19.4995
852	10.8333	16.8999	21.4499	22.7494	16.8996	22.0994	20.4745	27.2993	20.1495	19.4995
853	10.4	16.6833	21.2333	22.4244	16.8996	22.4244	20.1495	27.9493	19.4995	19.4995
854	10.6166	16.6833	21.6666	22.7494	16.8996	22.4244	20.1495	27.9493	19.4995	19.8245
855	10.6166	16.6833	21.4499	22.7494	16.5746	22.4244	20.4745	27.9493	19.4995	19.8245
856	10.4	16.6833	21.4499	22.7494	16.5746	22.4244	20.1495	27.9493	20.1495	19.4995
857	10.4	16.4666	21.2333	22.7494	16.8996	22.4244	20.1495	27.6243	19.8245	19.8245
858	10.6166	16.4666	21.4499	22.7494	16.8996	22.4244	20.4745	27.2993	19.1745	19.8245
859	10.6166	16.6833	21.2333	22.7494	16.8996	22.4244	20.4745	27.2993	19.8245	19.8245
860	10.6166	16.6833	21.4499	22.7494	16.5746	22.0994	20.1495	27.2993	20.1495	20.1495
861	10.4	16.6833	21.4499	22.4244	16.8996	22.4244	20.4745	27.9493	20.1495	19.8245
862	10.8333	16.6833	21.4499	22.4244	16.8996	22.0994	20.1495	27.9493	19.4995	19.8245
863	10.1833	16.6833	21.4499	22.7494	16.5746	22.7494	20.1495	27.9493	19.4995	20.1495
864	10.8333	16.6833	21.4499	22.7494	16.5746	22.7494	20.4745	27.6243	20.1495	19.8245
865	10.8333	16.8999	21.4499	22.7494	16.5746	23.0744	20.4745	27.9493	20.1495	19.4995
866	10.4	16.8999	21.4499	22.7494	16.5746	22.4244	20.4745	27.6243	20.1495	19.8245
867	10.4	16.4666	21.2333	22.4244	16.5746	22.4244	20.1495	27.9493	20.4745	19.8245
868	10.8333	16.8999	21.2333	22.4244	16.5746	22.0994	20.4745	27.6243	20.4745	19.4995
869	10.6166	16.6833	21.2333	22.4244	16.2496	22.7494	19.8245	27.9493	20.1495	19.8245
870	10.8333	16.4666	21.0166	22.7494	16.2496	22.4244	20.4745	27.9493	19.8245	19.4995
871	11.05	16.6833	21.0166	22.7494	16.8996	22.0994	20.4745	27.6243	20.1495	19.8245
872	10.4	16.6833	20.7999	22.7494	16.8996	22.0994	20.1495	27.6243	19.4995	20.1495
873	10.6166	16.6833	21.2333	22.7494	16.8996	22.0994	20.1495	27.6243	19.8245	20.1495
874	10.4	16.6833	21.0166	22.4244	16.5746	22.4244	20.4745	27.6243	19.8245	19.4995
875	10.8333	16.6833	21.2333	22.7494	16.5746	22.4244	20.4745	27.6243	19.4995	20.1495
876	10.6166	16.4666	21.0166	22.7494	16.5746	22.0994	20.1495	27.6243	19.8245	19.4995
877	10.4	16.6833	21.2333	22.7494	16.5746	22.0994	20.1495	26.9743	19.1745	19.8245
878	10.4	16.4666	21.0166	22.7494	16.5746	22.0994	20.1495	27.6243	20.1495	19.8245
879	10.6166	16.6833	21.0166	22.7494	16.2496	22.4244	19.8245	27.6243	19.4995	19.8245
880	10.6166	16.8999	20.7999	22.7494	16.2496	22.4244	20.4745	27.2993	19.4995	20.1495
881	11.05	16.4666	20.7999	22.7494	16.5746	22.0994	19.8245	26.9743	19.8245	19.4995
882	10.6166	16.4666	21.0166	22.4244	15.9246	22.7494	20.4745	26.9743	19.1745	19.1745
883	10.6166	16.6833	20.7999	22.7494	16.2496	22.0994	20.1495	27.9493	19.1745	19.1745
884	10.6166	16.2499	20.7999	22.7494	16.5746	22.0994	19.8245	27.2993	19.1745	19.1745
885	10.6166	16.6833	20.7999	22.4244	16.5746	22.4244	20.4745	27.9493	19.4995	19.4995
886	10.6166	16.4666	21.0166	22.7494	16.5746	22.4244	19.8245	27.9493	19.1745	19.8245
887	10.8333	16.6833	20.5833	22.7494	16.5746	22.0994	20.1495	27.6243	20.1495	19.4995
888	10.4	16.4666	20.7999	22.7494	16.2496	21.7745	19.8245	27.9493	19.8245	19.4995
889	10.6166	16.6833	20.7999	22.4244	16.5746	22.0994	20.4745	27.6243	19.4995	19.8245
890	10.4	16.4666	20.7999	22.0994	16.5746	22.0994	20.4745	27.6243	19.4995	19.4995
891	10.8333	16.4666	20.5833	22.4244	16.8996	22.0994	20.1495	27.2993	19.4995	19.4995
892	10.6166	16.6833	20.5833	22.4244	16.2496	22.0994	20.1495	27.2993	19.8245	19.8245
893	10.8333	16.2499	20.5833	22.7494	16.5746	22.7494	20.4745	27.2993	19.8245	20.1495
894	10.4	16.2499	20.7999	22.4244	16.2496	22.0994	20.4745	27.6243	19.4995	19.8245
895	10.8333	16.4666	20.7999	22.7494	16.2496	21.7745	20.4745	27.9493	19.1745	19.1745
896	10.6166	16.2499	21.0166	22.4244	16.8996	22.0994	20.7995	27.6243	19.8245	19.4995
897	10.8333	16.0333	20.7999	22.7494	16.8996	21.7745	20.4745	27.6243	19.4995	19.4995
898	10.4	16.4666	20.5833	22.4244	16.2496	22.0994	20.1495	27.6243	20.1495	19.8245
899	10.6166	16.8999	20.5833	22.4244	16.2496	22.0994	20.1495	27.2993	19.4995	19.8245
900	10.6166	16.6833	20.7999	22.7494	16.2496	22.4244	20.1495	27.6243	19.8245	19.8245
901	10.4	16.4666	21.2333	22.4244	16.2496	22.4244	19.8245	27.6243	20.1495	19.4995
902	10.8333	16.8999	21.2333	22.4244	16.5746	22.4244	20.4745	26.9743	19.8245	19.8245
903	10.6166	16.4666	20.5833	22.7494	16.2496	22.4244	20.4745	27.6243	20.1495	19.4995
904	10.6166	16.6833	21.0166	22.7494	16.2496	22.7494	19.8245	27.9493	19.1745	19.8245
905	10.4	16.8999	21.0166	22.7494	16.2496	21.7745	20.4745	26.9743	19.4995	19.8245
906	10.6166	16.6833	20.7999	22.7494	16.5746	22.0994	19.8245	27.6243	19.8245	19.4995
907	10.4	16.6833	21.0166	22.7494	16.2496	22.0994	20.1495	26.6493	20.1495	19.1745
908	10.6166	16.6833	21.0166	22.0994	16.2496	22.4244	20.1495	26.6493	19.1745	19.8245
909	10.8333	16.6833	20.7999	22.4244	16.5746	22.4244	19.8245	27.6243	19.4995	19.8245
910	10.8333	16.4666	20.7999	22.4244	16.2496	22.4244	19.8245	27.6243	19.8245	19.4995
911	10.6166	16.6833	21.2333	22.4244	16.2496	22.0994	19.8245	27.2993	20.1495	19.4995
912	10.6166	16.6833	21.2333	22.4244	16.2496	22.0994	20.4745	27.2993	20.1495	19.4995
913	10.6166	16.8999	21.2333	22.4244	16.5746	22.4244	19.8245	27.2993	19.8245	19.8245
914	10.6166	16.6833	21.0166	22.4244	16.2496	22.4244	19.8245	27.2993	20.1495	19.4995
915	10.6166	16.6833	20.7999	22.4244	16.2496	22.0994	20.1495	26.9743	19.4995	19.8245
916	10.6166	16.6833	20.7999	22.4244	16.2496	21.7745	20.4745	27.6243	19.8245	20.1495
917	10.4	16.6833	21.2333	22.7494	16.2496	22.0994	20.4745	27.6243	19.4995	19.1745
918	10.8333	16.8999	21.2333	22.4244	16.2496	22.0994	20.4745	27.9493	19.4995	19.8245
919	10.4	16.6833	21.0166	22.4244	16.5746	22.0994	19.4995	27.9493	19.4995	19.4995
920	10.6166	16.4666	20.7999	22.4244	16.5746	22.0994	19.8245	27.6243	19.8245	19.8245
921	10.1833	16.8999	21.2333	22.4244	16.2496	21.7745	19.4995	27.6243	19.8245	19.8245
922	10.4	16.4666	20.7999	22.4244	16.5746	21.7745	19.8245	27.6243	20.1495	19.8245
923	10.4	16.6833	21.2333	22.4244	16.2496	22.0994	19.1745	27.2993	20.1495	19.4995
924	10.4	16.4666	21.2333	22.4244	16.2496	21.7745	19.8245	26.9743	19.4995	19.4995
925	10.4	16.6833	21.0166	22.4244	16.5746	22.0994	19.8245	27.6243	20.1495	19.4995
926	10.6166	16.6833	21.0166	22.4244	16.5746	21.7745	19.8245	27.6243	20.1495	20.1495
927	10.4	16.2499	21.0166	22.4244	16.5746	21.4495	20.1495	27.2993	19.4995	19.8245
928	10.4	16.4666	21.2333	22.4244	16.2496	22.0994	19.4995	27.6243	19.8245	19.8245
929	10.4	16.4666	21.0166	22.4244	16.5746	22.0994	20.4745	27.6243	19.8245	19.4995
930	10.1833	16.0333	21.0166	22.4244	16.5746	22.0994	19.4995	27.6243	20.1495	19.8245
931	10.1833	16.2499	21.0166	22.0994	16.5746	21.7745	19.4995	27.2993	19.4995	20.1495
932	10.1833	16.4666	21.0166	22.4244	16.8996	21.7745	19.1745	27.2993	19.4995	19.8245
933	10.6166	16.4666	21.0166	22.4244	16.2496	22.4244	19.8245	27.2993	19.4995	20.1495
934	10.8333	16.6833	21.0166	22.4244	16.5746	22.4244	19.8245	27.9493	20.1495	19.8245
935	10.6166	16.2499	20.7999	22.4244	16.5746	22.0994	19.4995	27.2993	20.4745	20.1495
936	10.1833	16.6833	21.0166	22.0994	16.5746	22.0994	19.4995	28.2743	19.4995	19.8245
937	10.4	16.4666	21.0166	22.4244	16.5746	22.0994	19.1745	27.2993	20.1495	19.8245
938	10.6166	16.4666	21.0166	22.4244	16.2496	22.4244	19.8245	27.2993	20.1495	19.8245
939	10.6166	16.2499	20.7999	22.7494	16.2496	22.4244	19.4995	27.2993	20.1495	19.4995
940	10.4	16.2499	20.7999	22.4244	16.5746	22.0994	19.8245	27.6243	19.8245	19.8245
941	10.4	16.4666	20.7999	22.7494	16.5746	22.4244	20.1495	27.9493	19.4995	19.8245
942	10.4	16.4666	21.0166	22.7494	16.5746	22.4244	19.8245	27.9493	19.8245	19.8245
943	10.4	16.4666	21.0166	22.7494	16.5746	22.4244	19.4995	27.6243	19.8245	19.4995
944	10.6166	16.6833	21.0166	23.0744	16.2496	22.4244	19.8245	28.2743	19.8245	19.8245
945	10.8333	16.4666	21.0166	22.7494	16.5746	22.4244	19.8245	27.6243	19.8245	19.4995
946	10.4	16.4666	20.7999	22.7494	15.9246	22.4244	19.8245	27.2993	20.1495	19.4995
947	10.6166	16.6833	21.0166	23.0744	16.2496	22.4244	19.4995	27.6243	19.8245	19.4995
948	10.1833	16.6833	21.0166	23.0744	16.2496	22.7494	19.8245	28.2743	19.4995	19.4995
949	10.8333	16.4666	21.0166	22.7494	15.9246	22.4244	19.8245	26.9743	20.1495	19.4995
950	10.4	16.2499	21.2333	23.0744	16.2496	22.4244	19.8245	27.2993	19.4995	19.4995
951	10.6166	16.2499	21.0166	23.0744	16.2496	22.4244	19.8245	26.9743	19.8245	19.4995
952	10.4	16.4666	21.0166	22.7494	16.5746	22.4244	19.8245	27.9493	19.4995	19.8245
953	10.6166	16.4666	21.0166	22.7494	16.5746	22.4244	19.4995	27.6243	19.4995	19.1745
954	10.1833	16.2499	21.0166	23.0744	16.2496	22.4244	19.8245	27.6243	19.4995	19.4995
955	10.1833	16.4666	21.0166	23.0744	16.2496	22.4244	20.1495	27.2993	20.1495	19.4995
956	10.6166	16.0333	20.7999	23.0744	16.2496	22.0994	19.4995	27.6243	19.1745	19.4995
957	10.1833	16.4666	20.7999	22.7494	16.2496	22.4244	20.1495	27.6243	19.8245	19.4995
958	10.4	16.2499	20.7999	23.0744	16.2496	22.4244	20.1495	26.9743	19.8245	19.8245
959	10.6166	16.2499	21.2333	23.0744	15.5996	23.0744	19.8245	26.9743	20.1495	19.8245
960	11.05	16.6833	21.0166	22.7494	16.2496	23.0744	19.4995	27.6243	19.8245	19.8245
961	10.1833	16.4666	21.0166	23.0744	16.2496	22.7494	19.8245	27.2993	20.1495	19.1745
962	10.4	16.4666	20.7999	23.0744	15.5996	22.4244	19.1745	27.6243	19.8245	19.4995
963	10.1833	16.4666	20.7999	23.0744	15.2746	22.4244	19.4995	26.9743	20.1495	19.4995
964	10.4	16.4666	21.0166	23.0744	15.9246	22.4244	19.8245	27.2993	20.1495	19.4995
965	10.6166	16.2499	21.2333	22.7494	15.9246	22.4244	19.1745	27.9493	19.4995	20.1495
966	10.6166	16.4666	21.2333	22.7494	16.2496	22.4244	20.1495	27.2993	19.8245	19.4995
967	10.4	16.2499	21.0166	23.0744	15.9246	22.4244	19.8245	27.6243	19.8245	19.8245
968	10.8333	16.6833	21.0166	22.7494	16.2496	22.4244	19.8245	27.2993	19.8245	19.4995
969	10.6166	16.4666	21.0166	23.0744	16.2496	22.4244	19.8245	27.9493	19.4995	19.8245
970	10.6166	16.2499	21.0166	23.0744	16.5746	22.4244	20.1495	26.9743	20.1495	19.8245
971	10.6166	16.0333	21.0166	22.7494	15.9246	22.7494	19.8245	27.9493	20.4745	19.4995
972	10.4	16.2499	21.2333	23.0744	15.5996	22.7494	19.4995	27.9493	20.1495	19.8245
973	10.6166	16.2499	21.2333	22.7494	15.5996	22.7494	19.8245	27.6243	19.8245	19.8245
974	10.6166	16.4666	21.2333	22.7494	15.9246	22.7494	19.4995	27.6243	20.1495	19.8245
975	10.6166	16.4666	21.2333	23.0744	15.9246	22.4244	19.4995	26.9743	20.1495	19.8245
976	10.4	16.4666	21.2333	22.7494	15.9246	22.4244	19.8245	27.9493	19.8245	20.1495
977	10.6166	16.4666	21.0166	23.0744	15.9246	22.7494	19.8245	27.9493	20.1495	19.8245
978	10.4	16.2499	20.7999	23.0744	16.2496	22.7494	19.8245	27.6243	19.8245	19.8245
979	10.1833	16.4666	21.0166	23.0744	16.5746	22.7494	19.8245	27.6243	20.4745	19.4995
980	10.1833	16.4666	21.2333	22.7494	15.9246	22.4244	19.4995	27.2993	20.1495	19.8245
981	10.4	16.4666	21.0166	22.7494	15.9246	22.7494	20.1495	27.6243	20.1495	19.8245
982	10.8333	16.2499	21.0166	23.0744	15.9246	22.4244	20.1495	28.2743	20.1495	19.8245
983	10.4	16.6833	21.2333	23.0744	15.9246	22.0994	19.8245	27.9493	20.1495	19.8245
984	10.8333	16.4666	20.7999	22.7494	15.5996	22.4244	19.8245	27.9493	20.7995	19.8245
985	9.96663	16.2499	21.0166	22.7494	15.9246	22.7494	19.4995	27.2993	20.1495	19.4995
986	11.05	16.8999	21.2333	23.0744	15.5996	22.4244	20.4745	27.2993	20.1495	19.4995
987	10.1833	16.6833	21.0166	23.0744	15.9246	22.4244	19.8245	27.9493	20.7995	19.4995
988	10.6166	16.6833	21.0166	22.7494	15.5996	22.4244	19.8245	27.6243	20.7995	19.8245
989	10.6166	16.4666	21.0166	23.0744	15.9246	22.0994	19.4995	27.6243	20.4745	19.4995
990	10.1833	16.8999	21.0166	23.0744	15.2746	22.7494	19.4995	27.6243	21.1245	20.4745
991	9.96663	16.4666	21.0166	23.0744	15.5996	22.4244	20.1495	27.9493	20.7995	19.8245
992	10.1833	16.6833	21.0166	22.7494	15.9246	22.7494	20.1495	27.2993	20.4745	20.1495
993	10.4	16.2499	21.2333	23.0744	15.5996	22.4244	20.1495	27.6243	19.8245	20.1495
994	10.1833	16.6833	21.2333	22.7494	15.9246	22.7494	19.8245	27.9493	20.7995	19.8245
995	10.4	16.2499	21.2333	23.0744	15.9246	22.7494	19.8245	27.9493	21.4495	19.8245
996	10.4	16.2499	21.2333	23.0744	15.9246	22.7494	20.1495	28.2743	19.8245	19.8245
997	10.1833	16.6833	21.0166	22.7494	15.9246	22.7494	19.8245	27.6243	20.4745	19.8245
998	10.4	16.6833	21.2333	23.0744	15.9246	22.7494	18.8495	27.2993	20.1495	19.8245
999	9.96663	16.8999	21.2333	22.7494	16.2496	23.0744	19.4995	27.6243	20.4745	20.1495
1000	10.1833	16.4666	21.2333	22.7494	15.9246	22.7494	19.8245	27.2993	20.1495	20.4745
1001	10.4	16.8999	21.0166	22.7494	16.2496	22.4244	19.8245	27.6243	20.4745	20.1495
1002	10.6166	16.6833	21.0166	23.0744	16.2496	22.7494	19.8245	27.6243	20.1495	19.8245
1003	9.96663	16.8999	21.0166	23.0744	15.9246	22.7494	20.4745	27.6243	20.4745	19.4995
1004	10.6166	17.1166	21.2333	23.0744	15.9246	22.7494	19.8245	27.9493	20.1495	19.4995
1005	10.4	16.8999	21.2333	22.7494	15.9246	22.7494	19.8245	27.6243	20.1495	19.8245
1006	10.1833	16.8999	21.0166	22.7494	15.9246	22.0994	19.4995	27.9493	20.1495	19.8245
1007	10.4	17.1166	21.0166	22.7494	15.9246	22.7494	19.8245	27.2993	20.1495	19.8245
1008	10.4	16.8999	21.0166	23.0744	15.9246	22.4244	19.8245	27.6243	20.1495	19.8245
1009	10.8333	16.4666	21.0166	22.7494	16.2496	22.4244	19.4995	27.9493	20.1495	19.8245
1010	10.1833	17.1166	20.7999	23.0744	15.9246	22.7494	18.8495	27.9493	20.4745	20.1495
1011	10.4	16.6833	20.7999	22.7494	16.2496	22.0994	19.8245	27.9493	21.4495	19.8245
1012	10.6166	16.8999	21.2333	23.0744	16.5746	22.4244	19.8245	27.6243	20.4745	20.1495
1013	10.4	16.6833	20.7999	23.0744	16.2496	22.4244	19.1745	27.6243	20.4745	19.8245
1014	10.1833	16.8999	21.0166	22.7494	16.2496	22.0994	19.4995	27.6243	21.1245	19.8245
1015	10.1833	16.8999	20.7999	23.0744	15.9246	22.4244	19.4995	27.9493	20.4745	19.8245
1016	10.6166	17.1166	21.0166	22.7494	16.2496	22.4244	20.1495	26.9743	20.7995	19.8245
1017	10.6166	16.6833	20.7999	22.7494	16.2496	22.0994	19.4995	27.6243	20.1495	19.8245
1018	10.4	16.6833	21.2333	22.7494	16.2496	22.4244	19.4995	27.6243	21.1245	19.8245
1019	10.6166	16.4666	21.0166	22.7494	16.2496	22.4244	19.4995	27.9493	21.1245	19.4995
1020	10.1833	16.6833	20.7999	22.7494	16.2496	22.0994	19.8245	27.6243	20.4745	19.8245
1021	10.6166	16.4666	21.0166	22.7494	16.2496	22.0994	20.1495	27.6243	20.7995	19.4995
1022	10.4	16.6833	20.7999	22.7494	15.9246	22.7494	19.8245	27.9493	20.4745	20.4745
1023	10.4	16.6833	21.0166	23.0744	16.5746	22.0994	20.1495	27.9493	21.1245	19.4995
1024	10.1833	16.4666	21.0166	23.0744	16.5746	21.7745	19.8245	27.9493	20.4745	19.8245
1025	10.4	16.4666	20.5833	23.0744	16.5746	22.0994	19.8245	27.9493	20.7995	19.8245
1026	10.1833	16.4666	21.0166	22.7494	16.5746	22.0994	19.8245	27.2993	20.4745	19.8245
1027	10.1833	16.4666	20.7999	22.7494	16.5746	22.0994	19.4995	27.6243	20.4745	20.1495
1028	11.05	16.4666	21.0166	22.7494	16.2496	22.4244	19.4995	27.2993	20.4745	19.8245
1029	10.4	16.6833	20.7999	23.0744	16.2496	22.0994	19.8245	27.6243	20.4745	19.8245
1030	10.6166	16.4666	20.7999	22.7494	16.5746	22.0994	19.8245	27.9493	20.7995	19.8245
1031	10.4	16.6833	21.0166	23.0744	16.5746	22.0994	20.1495	27.6243	20.7995	19.8245
1032	10.1833	16.4666	21.0166	22.7494	16.5746	21.7745	19.8245	27.6243	21.1245	19.8245
1033	10.4	16.6833	20.7999	22.7494	16.5746	22.0994	19.8245	27.6243	20.4745	20.1495
1034	10.6166	16.6833	21.0166	23.0744	16.5746	22.0994	19.4995	27.9493	20.1495	20.1495
1035	9.96663	16.6833	20.7999	23.0744	16.5746	21.7745	20.1495	27.6243	20.7995	19.4995
1036	10.1833	16.4666	20.7999	22.7494	16.5746	22.0994	19.8245	26.9743	20.4745	19.8245
1037	10.6166	16.8999	20.7999	22.7494	16.5746	22.0994	20.1495	27.6243	20.1495	20.1495
1038	10.1833	16.6833	21.0166	23.0744	16.5746	22.0994	19.1745	27.6243	20.4745	20.1495
1039	10.6166	16.4666	20.7999	22.7494	16.5746	22.0994	19.8245	27.9493	20.4745	19.8245
1040	10.1833	16.4666	21.2333	23.0744	16.2496	22.4244	19.4995	27.9493	20.4745	20.1495
1041	10.6166	16.4666	21.0166	22.7494	16.2496	22.0994	19.8245	27.9493	20.4745	20.1495
1042	10.6166	16.8999	21.0166	23.0744	16.5746	22.0994	19.4995	27.9493	19.8245	19.8245
1043	10.8333	16.4666	20.7999	23.0744	16.5746	22.0994	20.1495	27.9493	20.4745	20.1495
1044	10.8333	16.4666	20.7999	22.7494	16.5746	22.0994	19.4995	27.2993	19.8245	19.8245
1045	10.8333	16.8999	20.7999	22.7494	16.5746	22.4244	19.4995	27.6243	20.7995	19.8245
1046	10.4	16.4666	20.7999	23.0744	16.5746	22.4244	20.1495	27.9493	20.1495	19.8245
1047	10.8333	16.8999	20.7999	22.7494	16.5746	22.0994	19.4995	27.9493	20.4745	19.8245
1048	10.8333	16.6833	20.7999	22.7494	16.5746	22.4244	19.8245	27.6243	19.8245	19.8245
1049	10.8333	16.8999	20.7999	22.7494	16.2496	22.0994	19.4995	27.6243	20.1495	19.8245
1050	10.4	16.6833	21.0166	23.0744	15.9246	21.7745	19.4995	27.2993	20.1495	19.8245
1051	10.6166	16.6833	20.7999	22.7494	16.2496	22.7494	19.8245	27.9493	20.4745	20.1495
1052	10.6166	16.6833	20.5833	23.0744	15.9246	22.0994	19.4995	27.2993	20.4745	19.8245
1053	10.6166	17.1166	21.0166	22.7494	16.2496	21.7745	19.8245	27.6243	20.1495	20.1495
1054	10.1833	16.8999	21.0166	22.7494	16.2496	22.4244	19.8245	27.6243	20.1495	20.1495
1055	10.6166	16.4666	20.7999	22.7494	15.9246	21.7745	19.8245	27.6243	20.7995	20.1495
1056	10.8333	16.6833	21.0166	22.7494	16.2496	21.7745	19.8245	27.6243	20.1495	20.4745
1057	10.4	16.8999	20.7999	22.7494	16.2496	22.4244	19.8245	27.9493	20.4745	20.1495
1058	10.6166	16.4666	20.7999	22.7494	15.9246	22.0994	19.8245	27.6243	20.7995	20.1495
1059	10.8333	16.4666	20.5833	22.7494	16.5746	21.7745	19.8245	27.6243	20.1495	19.8245
1060	10.4	16.4666	20.5833	22.7494	16.5746	22.0994	19.8245	27.6243	20.4745	19.8245
1061	10.4	16.4666	20.7999	23.0744	16.5746	22.0994	19.8245	27.6243	20.4745	20.1495
1062	10.6166	16.4666	20.3666	22.7494	16.5746	21.7745	19.8245	27.6243	20.4745	20.1495
1063	9.96663	16.4666	21.0166	22.7494	16.5746	22.0994	20.1495	28.2743	21.4495	19.8245
1064	10.8333	16.4666	20.7999	23.0744	16.5746	22.0994	19.8245	27.9493	20.7995	20.1495
1065	10.4	16.6833	21.0166	23.0744	16.5746	22.0994	19.4995	27.9493	20.4745	19.8245
1066	10.8333	17.1166	21.0166	23.0744	16.2496	22.0994	19.4995	28.2743	20.7995	19.8245
1067	10.8333	16.2499	20.7999	23.0744	16.2496	22.4244	19.8245	27.6243	20.7995	19.8245
1068	10.6166	16.6833	20.5833	23.0744	16.2496	22.0994	20.4745	27.6243	20.4745	19.8245
1069	10.8333	16.6833	20.3666	23.0744	16.5746	21.7745	19.8245	27.2993	20.4745	19.8245
1070	10.6166	16.4666	20.7999	22.7494	16.2496	22.4244	19.8245	26.9743	20.7995	19.8245
1071	11.05	16.4666	20.5833	23.0744	16.2496	21.7745	19.4995	27.9493	20.4745	19.8245
1072	10.6166	16.6833	20.7999	22.7494	16.5746	22.4244	19.8245	27.2993	20.4745	19.8245
1073	10.6166	17.1166	20.7999	22.7494	16.2496	22.0994	19.4995	27.9493	20.7995	19.8245
1074	10.6166	16.4666	20.5833	22.7494	16.5746	21.7745	20.4745	27.9493	21.4495	19.8245
1075	10.6166	16.4666	20.5833	22.7494	16.5746	22.0994	19.8245	27.2993	20.1495	19.8245
1076	10.1833	16.8999	20.7999	22.7494	16.2496	21.7745	20.1495	27.2993	20.7995	19.8245
1077	10.6166	16.8999	20.5833	22.7494	16.2496	22.0994	19.4995	27.2993	20.1495	19.8245
1078	10.6166	17.1166	21.0166	22.7494	16.5746	21.7745	19.8245	27.6243	20.7995	19.4995
1079	10.6166	16.6833	20.7999	22.7494	16.5746	22.4244	20.1495	28.2743	20.7995	20.1495
1080	10.8333	16.6833	20.5833	23.0744	16.5746	21.7745	20.4745	27.6243	20.1495	19.8245
1081	10.1833	16.6833	20.7999	22.7494	16.5746	21.7745	20.1495	27.6243	20.7995	19.8245
1082	10.4	16.6833	21.0166	23.0744	16.8996	21.4495	20.1495	27.6243	20.7995	20.1495
1083	10.1833	16.6833	20.7999	22.7494	16.2496	21.7745	19.8245	27.9493	20.7995	19.8245
1084	10.6166	16.6833	21.2333	23.0744	16.8996	22.0994	20.1495	28.2743	21.4495	20.1495
1085	10.4	16.6833	20.7999	23.0744	16.5746	22.0994	19.8245	27.9493	20.4745	19.8245
1086	10.4	16.2499	20.7999	22.7494	16.8996	21.4495	20.1495	27.9493	20.7995	19.8245
1087	10.6166	16.6833	20.5833	22.7494	16.5746	21.7745	20.4745	27.6243	20.7995	20.1495
1088	10.6166	16.6833	20.7999	23.0744	16.5746	21.7745	19.8245	27.9493	20.4745	19.8245
1089	10.6166	16.8999	21.0166	23.0744	15.9246	21.1245	20.1495	26.9743	20.7995	20.1495
1090	11.05	16.6833	21.0166	22.7494	15.5996	21.7745	20.1495	27.6243	20.1495	20.1495
1091	10.8333	16.4666	20.7999	23.0744	15.9246	21.7745	20.4745	28.2743	19.8245	20.4745
1092	10.8333	16.6833	20.7999	22.7494	15.9246	21.4495	20.1495	27.6243	21.1245	20.1495
1093	10.8333	16.6833	21.0166	23.0744	16.2496	22.0994	19.8245	27.9493	20.7995	19.8245
1094	10.8333	16.6833	21.0166	22.7494	16.5746	22.0994	20.1495	27.9493	20.4745	19.8245
1095	10.6166	16.6833	21.0166	22.7494	16.5746	22.0994	20.1495	27.9493	21.1245	19.8245
1096	10.4	16.6833	21.0166	23.0744	16.5746	21.7745	19.4995	27.9493	20.4745	20.1495
1097	10.6166	16.8999	21.0166	22.7494	15.9246	21.7745	20.1495	27.6243	20.7995	19.8245
1098	10.8333	16.6833	21.0166	22.7494	15.5996	21.4495	19.8245	27.9493	20.4745	19.8245
1099	10.6166	16.4666	21.0166	22.7494	16.5746	22.4244	19.8245	27.6243	20.4745	20.1495
1100	10.6166	16.2499	20.7999	22.7494	15.9246	22.0994	20.4745	27.9493	20.4745	20.1495
1101	10.6166	16.4666	20.7999	22.7494	15.9246	22.0994	19.8245	27.6243	20.7995	19.8245
1102	10.6166	16.6833	21.0166	22.7494	16.2496	22.0994	20.1495	27.6243	21.1245	20.1495
1103	10.8333	16.2499	20.7999	22.7494	15.9246	22.4244	19.8245	27.6243	20.1495	19.8245
1104	10.4	16.4666	20.7999	23.0744	15.9246	22.0994	20.1495	27.9493	20.4745	20.1495
1105	10.8333	16.8999	20.3666	22.7494	16.2496	22.0994	19.8245	27.6243	20.7995	20.1495
1106	11.05	16.6833	20.7999	23.0744	16.2496	22.0994	19.8245	27.9493	21.1245	20.1495
1107	10.8333	16.6833	20.7999	23.0744	16.5746	21.7745	20.1495	27.9493	21.1245	20.1495
1108	11.05	16.2499	20.5833	22.7494	16.2496	22.4244	20.1495	27.9493	20.1495	19.8245
1109	10.6166	16.4666	20.7999	22.7494	16.2496	22.4244	19.8245	28.2743	20.4745	20.1495
1110	10.8333	16.6833	21.0166	23.0744	16.5746	21.7745	19.8245	27.9493	21.1245	19.8245
1111	10.6166	16.4666	20.7999	23.0744	16.2496	22.0994	20.1495	27.6243	20.7995	20.1495
1112	10.6166	16.2499	20.7999	22.7494	16.2496	21.7745	20.1495	27.9493	20.7995	19.8245
1113	10.1833	16.6833	20.7999	22.7494	16.2496	21.7745	19.8245	28.2743	20.4745	19.8245
1114	10.8333	16.6833	21.0166	23.0744	16.5746	21.7745	20.1495	28.2743	20.4745	19.8245
1115	10.6166	16.6833	20.7999	22.7494	16.2496	22.4244	20.1495	28.2743	20.7995	20.1495
1116	10.6166	16.6833	21.0166	22.7494	15.9246	22.0994	20.4745	27.2993	20.4745	20.1495
1117	10.6166	16.0333	21.0166	23.0744	16.2496	22.0994	20.1495	28.2743	20.7995	20.4745
1118	10.8333	16.4666	21.0166	23.0744	15.9246	21.7745	20.1495	27.6243	20.7995	20.1495
1119	10.6166	16.4666	21.0166	22.7494	15.9246	22.0994	20.1495	28.2743	20.7995	20.1495
1120	10.6166	16.4666	20.7999	22.7494	15.9246	21.7745	20.1495	27.6243	20.1495	20.1495
1121	10.6166	16.6833	21.0166	23.0744	15.9246	21.7745	19.8245	28.2743	20.7995	20.1495
1122	10.8333	16.2499	20.7999	22.7494	15.5996	22.4244	20.1495	27.9493	20.7995	19.8245
1123	10.4	16.6833	20.7999	22.7494	16.2496	21.7745	19.8245	27.6243	21.4495	19.8245
1124	10.8333	16.8999	21.0166	23.0744	16.2496	22.0994	20.1495	28.2743	20.1495	19.8245
1125	10.6166	16.4666	21.0166	23.0744	16.2496	22.0994	19.8245	27.6243	20.7995	19.8245
1126	10.8333	16.4666	21.0166	23.0744	16.2496	22.0994	20.1495	27.6243	21.4495	19.8245
1127	10.8333	16.8999	21.0166	22.7494	16.2496	22.0994	20.1495	28.2743	20.7995	20.1495
1128	10.4	16.4666	21.2333	22.7494	16.5746	22.0994	20.1495	28.2743	21.1245	20.4745
1129	10.8333	16.6833	21.2333	22.7494	16.2496	22.4244	19.8245	27.9493	21.1245	19.8245
1130	11.05	16.4666	21.0166	22.7494	16.2496	21.7745	19.8245	28.2743	20.7995	19.8245
1131	10.6166	16.6833	21.0166	23.0744	16.2496	22.0994	20.1495	27.9493	20.7995	19.8245
1132	10.8333	16.2499	20.7999	22.7494	16.2496	21.7745	19.8245	28.2743	20.4745	19.8245
1133	10.8333	16.2499	21.0166	22.7494	16.5746	22.0994	19.8245	27.9493	20.7995	19.8245
1134	10.6166	16.4666	21.0166	23.0744	16.2496	21.7745	20.1495	28.5993	21.1245	19.8245
1135	10.6166	16.6833	21.0166	23.0744	16.2496	21.7745	20.1495	27.9493	20.7995	20.1495
1136	10.8333	16.2499	20.7999	22.7494	16.2496	22.0994	20.1495	28.2743	20.7995	19.8245
1137	10.6166	16.4666	21.0166	23.0744	16.2496	22.0994	20.1495	27.9493	20.4745	19.8245
1138	10.8333	16.2499	21.2333	23.0744	15.9246	21.7745	20.4745	27.9493	20.4745	19.8245
1139	11.05	16.0333	21.0166	22.7494	16.5746	22.4244	20.4745	27.9493	21.1245	19.4995
1140	10.8333	16.4666	21.2333	22.7494	16.2496	22.0994	20.4745	27.6243	20.4745	19.8245
1141	10.6166	16.4666	21.2333	22.7494	15.9246	22.0994	19.8245	27.2993	20.7995	20.1495
1142	10.8333	16.4666	20.7999	22.7494	16.5746	22.0994	20.4745	28.2743	20.1495	19.8245
1143	10.8333	16.4666	21.0166	22.7494	16.2496	22.4244	20.4745	27.9493	20.7995	19.8245
1144	10.8333	16.2499	20.5833	22.7494	15.9246	22.0994	20.4745	28.5993	20.7995	19.8245
1145	10.6166	16.4666	21.4499	22.7494	16.2496	21.4495	20.1495	27.2993	20.7995	20.1495
1146	10.4	16.4666	21.2333	22.7494	16.5746	22.0994	20.1495	27.2993	20.4745	20.1495
1147	10.6166	16.4666	21.2333	22.7494	16.5746	22.0994	20.1495	27.2993	20.4745	20.1495
1148	10.8333	16.4666	21.0166	22.7494	16.5746	21.7745	20.1495	27.9493	21.4495	20.1495
1149	10.4	16.6833	21.0166	23.0744	15.9246	22.0994	19.8245	27.2993	21.1245	19.8245
1150	10.4	16.6833	21.4499	22.7494	16.5746	22.7494	20.4745	27.9493	21.1245	19.8245
1151	10.4	16.2499	21.2333	23.0744	16.5746	22.0994	21.1245	27.2993	20.7995	19.8245
1152	10.6166	16.4666	21.2333	22.7494	15.9246	22.0994	20.4745	27.9493	21.7745	20.1495
1153	11.05	16.4666	21.2333	22.7494	15.9246	22.0994	20.4745	27.6243	20.7995	20.1495
1154	10.8333	16.8999	20.5833	22.7494	16.2496	22.0994	19.4995	27.9493	20.7995	20.1495
1155	10.6166	15.8166	21.0166	23.0744	16.5746	22.0994	20.4745	27.6243	20.7995	20.1495
1156	10.8333	16.2499	21.0166	23.0744	16.2496	22.0994	20.4745	27.2993	21.1245	19.8245
1157	11.05	16.6833	20.7999	22.7494	15.9246	22.0994	19.8245	27.6243	20.7995	19.8245
1158	11.05	16.2499	21.0166	23.0744	15.9246	21.7745	20.1495	28.2743	20.1495	20.1495
1159	10.6166	16.4666	20.3666	22.7494	16.2496	22.4244	19.8245	27.6243	20.7995	20.1495
1160	10.4	16.4666	21.0166	23.0744	15.9246	21.4495	19.8245	27.6243	20.4745	20.1495
1161	11.05	16.4666	21.2333	22.7494	16.5746	22.0994	20.1495	27.6243	20.7995	19.8245
1162	10.4	16.4666	21.0166	23.0744	16.5746	22.4244	19.8245	27.9493	20.4745	19.8245
1163	10.8333	16.4666	21.4499	22.4244	16.2496	22.4244	20.1495	27.2993	20.4745	19.8245
1164	10.8333	16.6833	20.7999	23.0744	16.2496	22.0994	20.1495	27.9493	20.4745	20.1495
1165	11.05	16.4666	20.7999	22.7494	16.2496	22.4244	20.1495	28.2743	21.1245	20.4745
1166	10.8333	16.4666	21.0166	22.7494	16.2496	21.7745	20.4745	27.9493	20.7995	19.8245
1167	11.05	16.2499	21.2333	22.7494	16.5746	22.0994	20.1495	27.6243	20.7995	20.1495
1168	10.8333	16.4666	20.7999	22.7494	16.5746	22.4244	20.4745	27.6243	21.4495	20.1495
1169	10.8333	16.2499	21.0166	23.0744	16.2496	22.0994	20.1495	27.9493	20.7995	20.1495
1170	10.8333	16.2499	21.0166	22.7494	16.5746	22.0994	20.1495	27.9493	20.7995	19.8245
1171	10.4	16.4666	21.0166	22.7494	16.5746	22.4244	20.1495	27.6243	21.1245	20.1495
1172	11.05	16.4666	21.4499	22.4244	16.5746	22.7494	20.1495	26.9743	20.7995	19.8245
1173	10.8333	16.6833	20.3666	22.7494	16.2496	22.4244	20.1495	27.6243	21.1245	20.1495
1174	10.8333	16.4666	21.2333	22.7494	16.5746	22.0994	20.1495	27.9493	20.4745	20.1495
1175	10.8333	16.4666	21.2333	23.0744	16.5746	22.7494	20.1495	27.6243	20.4745	20.1495
1176	11.05	16.2499	20.5833	22.7494	16.2496	22.4244	19.8245	27.9493	20.7995	20.1495
1177	11.05	16.4666	21.0166	22.7494	16.2496	22.0994	19.8245	27.6243	20.7995	20.1495
1178	10.8333	16.4666	21.0166	23.0744	16.2496	22.7494	20.7995	27.9493	20.7995	20.4745
1179	10.8333	16.6833	20.3666	22.7494	16.2496	22.7494	20.4745	27.9493	21.1245	20.1495
1180	10.8333	16.4666	21.0166	22.4244	16.2496	22.4244	19.8245	27.6243	21.1245	20.1495
1181	10.6166	16.2499	20.7999	22.7494	16.2496	22.0994	20.4745	27.9493	20.7995	19.8245
1182	10.4	16.4666	20.5833	22.7494	16.2496	22.4244	20.1495	27.6243	20.7995	19.8245
1183	10.8333	16.2499	20.7999	23.0744	16.2496	22.4244	20.1495	27.6243	20.7995	20.1495
1184	11.05	16.2499	21.0166	22.7494	15.9246	22.0994	20.1495	27.6243	20.7995	19.8245
1185	10.8333	16.4666	21.2333	23.0744	15.9246	22.7494	20.4745	27.9493	20.4745	19.8245
1186	11.05	16.4666	21.0166	22.4244	16.2496	22.4244	20.4745	27.9493	21.4495	20.1495
1187	11.05	16.6833	21.2333	22.7494	16.2496	22.7494	20.1495	27.9493	20.4745	20.1495
1188	11.05	16.2499	21.0166	22.7494	15.9246	22.4244	19.8245	28.2743	20.7995	20.1495
1189	10.8333	16.4666	21.0166	22.7494	15.9246	22.0994	20.4745	28.2743	20.7995	20.4745
1190	10.6166	16.4666	20.7999	22.7494	16.2496	22.4244	19.8245	27.9493	20.7995	20.1495
1191	10.6166	16.2499	21.0166	22.7494	16.2496	22.4244	20.4745	26.9743	21.1245	20.4745
1192	10.8333	16.2499	20.7999	22.7494	16.2496	22.7494	19.8245	27.9493	20.4745	19.8245
1193	10.6166	16.0333	21.0166	22.7494	15.9246	22.4244	20.1495	27.9493	20.7995	20.1495
1194	10.8333	16.2499	21.2333	22.7494	16.2496	22.4244	20.1495	27.2993	20.7995	19.8245
1195	11.05	16.4666	21.0166	23.0744	16.2496	21.7745	20.1495	27.6243	21.1245	19.8245
1196	10.8333	16.0333	21.2333	22.7494	15.9246	22.4244	20.4745	27.6243	20.1495	19.8245
1197	10.1833	16.2499	21.0166	22.4244	16.2496	22.4244	20.1495	27.2993	20.4745	20.4745
1198	10.8333	16.4666	21.0166	22.7494	15.9246	22.0994	19.8245	27.6243	20.7995	20.4745
1199	10.4	16.2499	21.0166	22.7494	15.9246	22.0994	19.8245	27.6243	21.1245	20.1495
1200	10.8333	16.6833	21.2333	22.7494	16.2496	22.4244	20.4745	27.2993	20.7995	19.8245
1201	11.05	16.2499	21.0166	22.4244	16.2496	22.4244	20.4745	27.9493	21.1245	20.1495
1202	10.8333	16.4666	21.0166	23.0744	16.2496	22.4244	19.8245	27.6243	21.1245	19.8245
1203	11.05	16.4666	21.2333	22.4244	16.2496	22.4244	20.1495	27.2993	20.7995	20.1495
1204	11.05	16.2499	21.4499	22.7494	16.2496	22.4244	20.1495	27.6243	20.7995	20.1495
1205	10.8333	16.4666	21.2333	23.0744	16.5746	22.0994	20.1495	27.6243	21.1245	20.4745
1206	10.6166	16.4666	21.2333	23.0744	16.5746	22.0994	20.4745	27.2993	21.1245	19.8245
1207	11.05	16.2499	21.2333	22.7494	15.9246	22.4244	20.4745	27.6243	20.7995	20.1495
1208	11.05	16.2499	21.0166	22.7494	16.5746	22.4244	20.1495	27.6243	21.7745	20.1495
1209	11.05	16.4666	21.0166	23.0744	16.2496	22.7494	20.7995	27.6243	20.7995	19.8245
1210	11.05	16.2499	21.0166	22.7494	16.2496	22.4244	19.8245	27.9493	20.7995	19.8245
1211	11.05	16.2499	21.2333	23.0744	16.5746	21.7745	20.4745	27.6243	20.4745	20.4745
1212	10.8333	16.4666	21.2333	23.0744	16.5746	22.7494	20.4745	28.2743	20.4745	20.1495
1213	11.05	16.2499	21.0166	23.0744	16.5746	22.4244	20.4745	27.2993	21.1245	19.8245
1214	10.8333	16.2499	21.0166	22.7494	16.5746	22.0994	20.1495	27.9493	20.4745	20.4745
1215	11.2666	16.2499	20.7999	22.7494	16.2496	22.0994	19.8245	27.6243	20.4745	19.8245
1216	10.8333	16.4666	21.2333	22.4244	16.5746	22.4244	20.1495	27.9493	20.4745	20.1495
1217	11.2666	16.2499	21.2333	22.7494	15.9246	22.0994	20.7995	27.6243	20.7995	19.8245
1218	10.8333	16.2499	21.0166	22.7494	15.9246	22.4244	20.4745	27.6243	20.7995	19.8245
1219	10.8333	16.0333	21.0166	22.7494	16.2496	22.4244	20.4745	27.6243	21.4495	20.7995
1220	10.8333	16.2499	20.7999	22.7494	15.9246	22.4244	20.1495	27.2993	20.7995	20.4745
1221	11.05	16.4666	20.7999	22.7494	15.9246	22.4244	20.1495	27.6243	21.7745	19.8245
1222	10.8333	16.2499	21.0166	23.0744	16.2496	22.4244	19.4995	27.6243	20.7995	20.1495
1223	11.2666	16.2499	21.0166	23.0744	15.9246	23.0744	20.4745	27.2993	21.1245	20.1495
1224	11.05	16.2499	20.7999	22.7494	16.5746	23.0744	20.4745	27.9493	20.4745	19.8245
1225	10.8333	16.4666	21.0166	22.7494	16.5746	22.7494	20.4745	26.9743	21.1245	19.8245
1226	11.05	16.4666	21.0166	22.7494	16.5746	22.7494	19.8245	27.6243	21.4495	20.1495
1227	10.8333	16.0333	21.0166	22.7494	16.2496	22.7494	20.7995	27.6243	20.4745	20.1495
1228	11.05	16.4666	20.5833	22.7494	16.5746	22.7494	20.1495	28.2743	21.1245	20.1495
1229	10.8333	16.4666	21.0166	23.0744	16.2496	23.0744	20.7995	27.6243	20.7995	20.1495
1230	10.8333	16.2499	21.0166	22.7494	16.5746	22.7494	20.1495	27.6243	20.1495	19.8245
1231	10.8333	16.6833	21.0166	23.0744	16.5746	22.7494	19.8245	27.9493	20.7995	20.4745
1232	11.2666	16.4666	21.0166	22.4244	16.5746	22.7494	20.1495	27.2993	21.1245	20.1495
1233	11.05	16.0333	21.0166	22.7494	15.9246	22.7494	20.1495	27.9493	20.4745	19.8245
1234	10.8333	16.2499	20.7999	22.7494	16.2496	22.4244	20.4745	27.9493	20.7995	20.1495
1235	11.05	16.2499	21.0166	23.0744	16.5746	22.4244	20.1495	27.2993	20.7995	20.1495
1236	11.05	16.4666	21.2333	22.7494	16.5746	22.7494	20.7995	27.9493	20.7995	19.8245
1237	11.05	16.2499	21.0166	22.7494	16.5746	22.7494	19.8245	27.6243	20.4745	20.1495
1238	10.4	16.4666	21.2333	22.7494	16.2496	23.0744	20.1495	28.2743	20.1495	19.8245
1239	10.8333	16.4666	21.2333	22.4244	16.2496	23.0744	20.7995	27.2993	20.4745	20.1495
1240	10.8333	16.4666	21.2333	22.4244	16.5746	22.7494	20.1495	27.6243	20.4745	20.1495
1241	10.6166	16.2499	20.7999	22.4244	16.2496	22.4244	20.1495	27.6243	20.7995	20.1495
1242	10.6166	16.0333	21.2333	22.7494	15.9246	22.7494	20.7995	27.6243	20.7995	20.1495
1243	11.05	16.2499	20.7999	22.7494	15.9246	22.4244	19.8245	27.9493	20.7995	20.4745
1244	10.8333	16.2499	20.7999	22.7494	16.5746	22.7494	20.4745	27.9493	20.1495	20.4745
1245	10.6166	16.2499	21.0166	22.7494	16.5746	22.7494	20.1495	27.6243	20.7995	20.1495
1246	11.2666	16.2499	21.0166	22.7494	16.5746	22.7494	19.8245	27.6243	20.4745	20.1495
1247	11.2666	16.4666	20.7999	22.7494	16.5746	22.4244	19.8245	27.2993	20.7995	20.1495
1248	10.6166	16.4666	21.0166	22.7494	16.5746	22.4244	19.8245	27.2993	21.1245	20.1495
1249	10.4	16.6833	20.7999	22.7494	16.2496	22.4244	19.4995	27.6243	20.7995	20.1495
1250	11.05	16.4666	21.2333	22.7494	16.5746	22.7494	19.8245	27.9493	20.4745	19.8245
1251	11.05	16.2499	21.0166	22.7494	16.2496	22.7494	20.4745	27.6243	21.1245	20.4745
1252	10.8333	16.2499	21.0166	22.7494	16.5746	22.0994	20.1495	27.9493	20.4745	20.4745
1253	10.8333	16.0333	20.7999	22.7494	16.2496	22.4244	20.1495	27.6243	21.1245	20.4745
1254	11.05	16.0333	21.0166	22.4244	16.2496	22.4244	20.1495	27.2993	20.7995	20.1495
1255	10.8333	16.4666	21.0166	22.4244	15.9246	22.7494	20.1495	27.6243	21.1245	20.1495
1256	11.05	16.4666	21.2333	22.7494	15.5996	22.7494	20.4745	27.6243	20.7995	20.4745
1257	10.8333	16.4666	21.0166	22.4244	15.9246	22.4244	20.1495	27.2993	21.1245	19.8245
1258	10.6166	16.4666	21.0166	22.4244	16.2496	22.0994	20.1495	27.6243	20.7995	20.4745
1259	11.2666	16.2499	21.2333	22.7494	16.2496	22.0994	20.1495	27.2993	21.4495	20.1495
1260	11.4833	16.4666	20.7999	22.7494	16.2496	22.4244	20.1495	27.9493	20.7995	20.1495
1261	11.05	16.6833	21.2333	22.4244	16.2496	22.0994	20.4745	27.9493	21.4495	20.1495
1262	11.4833	16.4666	21.0166	22.7494	16.5746	22.4244	19.8245	27.6243	21.1245	20.7995
1263	11.05	16.4666	21.0166	22.7494	16.2496	21.7745	20.7995	27.9493	21.1245	19.8245
1264	11.05	16.4666	21.0166	22.4244	16.2496	22.0994	19.8245	27.2993	21.1245	20.4745
1265	11.05	16.2499	21.0166	22.7494	16.5746	22.4244	20.1495	27.6243	21.4495	20.4745
1266	11.4833	16.2499	20.7999	22.7494	16.5746	22.4244	20.1495	27.6243	20.7995	20.1495
1267	11.05	16.4666	21.0166	22.7494	16.5746	22.0994	20.1495	27.2993	21.1245	20.4745
1268	11.05	16.4666	21.0166	22.7494	16.5746	22.0994	20.1495	27.2993	20.7995	20.7995
1269	11.05	16.2499	21.0166	22.4244	16.2496	21.7745	19.8245	27.2993	20.7995	20.7995
1270	11.05	16.4666	21.0166	22.4244	16.2496	22.0994	19.8245	27.6243	21.1245	20.1495
1271	11.05	16.4666	21.0166	22.4244	16.5746	22.4244	20.4745	27.6243	21.1245	20.4745
1272	11.2666	16.2499	21.0166	22.7494	16.5746	22.0994	20.1495	27.9493	21.7745	19.8245
1273	10.8333	16.4666	21.0166	22.7494	16.2496	22.0994	20.1495	27.2993	20.7995	20.1495
1274	11.05	16.4666	21.0166	22.7494	16.2496	22.4244	20.4745	27.2993	21.1245	20.4745
1275	11.2666	16.2499	21.0166	22.7494	16.5746	21.7745	20.1495	27.6243	20.7995	20.4745
1276	11.05	16.2499	21.0166	22.7494	16.2496	22.0994	20.4745	27.2993	21.4495	20.1495
1277	10.8333	16.2499	21.0166	22.7494	16.2496	21.7745	20.1495	27.9493	21.1245	20.1495
1278	10.6166	16.2499	20.7999	22.7494	16.2496	22.0994	20.1495	27.9493	20.7995	20.1495
1279	10.8333	16.2499	20.7999	22.4244	15.9246	22.0994	20.1495	27.9493	21.1245	20.1495
1280	10.8333	16.2499	21.0166	22.7494	16.5746	22.0994	20.1495	27.6243	20.7995	20.4745
1281	11.05	16.2499	21.0166	22.7494	16.2496	22.0994	20.1495	27.2993	20.7995	20.4745
1282	10.4	16.2499	21.0166	22.7494	16.5746	22.4244	20.1495	27.6243	21.1245	20.1495
1283	10.8333	16.4666	21.2333	22.7494	16.2496	22.4244	20.1495	27.6243	21.1245	20.4745
1284	11.05	16.0333	21.2333	22.7494	16.2496	21.7745	20.1495	27.6243	20.7995	20.4745
1285	11.05	16.2499	20.7999	22.7494	16.2496	22.0994	20.1495	26.9743	21.1245	20.4745
1286	11.05	16.0333	20.7999	22.7494	16.2496	22.0994	20.1495	27.6243	20.1495	20.4745
1287	11.2666	16.2499	20.7999	22.7494	16.2496	21.7745	20.1495	27.2993	21.4495	20.4745
1288	11.2666	16.4666	21.0166	22.4244	16.2496	22.4244	20.1495	27.9493	21.4495	20.1495
1289	11.2666	16.2499	21.0166	22.7494	16.5746	22.0994	20.4745	27.2993	21.1245	20.1495
1290	11.2666	16.2499	20.7999	22.7494	16.2496	22.4244	20.4745	27.6243	20.1495	20.4745
1291	11.2666	16.2499	21.0166	22.4244	16.2496	22.0994	20.4745	27.6243	21.4495	20.4745
1292	10.6166	16.2499	21.2333	22.4244	16.2496	22.0994	20.1495	27.6243	20.7995	20.4745
1293	11.2666	16.2499	21.0166	22.7494	16.2496	22.4244	20.4745	27.6243	21.1245	20.1495
1294	11.05	16.4666	21.0166	22.4244	16.2496	22.0994	19.8245	27.9493	21.7745	20.1495
1295	11.2666	16.2499	21.0166	22.7494	16.2496	22.0994	20.7995	27.9493	20.7995	20.4745
1296	11.05	16.2499	21.0166	22.7494	16.2496	22.4244	20.4745	27.6243	21.1245	20.4745
1297	10.6166	16.4666	21.0166	22.7494	16.2496	22.4244	20.1495	27.6243	21.1245	20.4745
1298	11.2666	16.2499	21.0166	22.4244	16.2496	21.7745	20.1495	27.6243	21.1245	20.1495
1299	11.2666	16.2499	21.2333	22.4244	16.2496	21.7745	20.1495	27.2993	21.4495	20.1495
1300	11.2666	16.4666	21.0166	22.7494	15.9246	21.7745	20.1495	27.9493	21.1245	20.4745
1301	10.6166	16.2499	21.0166	22.7494	16.2496	22.4244	20.4745	27.9493	21.1245	20.1495
1302	11.2666	16.0333	21.2333	22.7494	16.2496	22.0994	19.8245	27.2993	21.1245	20.1495
1303	11.05	16.4666	21.0166	22.7494	16.2496	21.7745	20.1495	27.2993	20.4745	20.1495
1304	10.8333	16.4666	21.0166	22.4244	16.2496	22.0994	20.7995	27.6243	20.7995	20.7995
1305	11.2666	16.4666	21.0166	22.7494	16.2496	22.0994	20.1495	27.6243	20.4745	20.1495
1306	11.05	16.2499	20.7999	22.4244	16.2496	21.7745	19.4995	27.9493	20.4745	20.1495
1307	11.2666	16.4666	21.0166	22.4244	15.9246	22.4244	20.1495	27.6243	20.7995	20.1495
1308	10.8333	16.4666	21.0166	22.7494	16.2496	22.4244	20.1495	27.9493	21.1245	20.4745
1309	10.8333	16.4666	21.0166	22.4244	16.2496	21.7745	20.1495	27.9493	21.1245	20.1495
1310	11.2666	16.4666	21.0166	22.4244	15.9246	21.7745	20.7995	27.6243	20.7995	20.1495
1311	10.8333	16.0333	21.0166	22.7494	15.9246	21.7745	19.8245	27.9493	20.4745	20.1495
1312	10.8333	16.2499	21.0166	22.7494	16.2496	22.0994	20.1495	27.6243	21.1245	20.1495
1313	11.05	16.2499	21.2333	22.4244	15.9246	21.7745	20.4745	27.6243	21.1245	20.1495
1314	11.2666	16.0333	21.0166	22.4244	16.2496	21.4495	20.1495	28.2743	20.1495	20.1495
1315	10.6166	16.4666	21.0166	22.4244	16.2496	21.4495	20.1495	27.2993	20.7995	20.4745
1316	11.05	16.2499	20.7999	22.7494	15.9246	21.1245	20.1495	27.6243	21.1245	20.1495
1317	11.05	16.2499	21.2333	22.0994	16.2496	21.7745	20.1495	27.6243	21.1245	20.1495
1318	11.2666	16.2499	21.0166	22.7494	15.9246	21.7745	20.1495	28.2743	20.1495	20.1495
1319	10.8333	16.2499	21.0166	22.7494	16.2496	22.0994	20.1495	27.9493	20.7995	20.7995
1320	10.8333	16.2499	21.0166	22.4244	16.2496	21.7745	19.4995	27.2993	20.7995	20.4745
1321	11.05	16.2499	21.0166	22.7494	15.5996	21.7745	20.1495	27.9493	21.1245	20.4745
1322	10.4	16.2499	21.0166	22.4244	15.9246	21.7745	20.1495	27.9493	21.4495	20.1495
1323	11.05	16.0333	21.2333	22.7494	16.2496	22.4244	19.8245	27.6243	21.1245	20.4745
1324	10.8333	16.4666	21.0166	22.7494	16.2496	22.0994	20.4745	27.9493	21.1245	20.4745
1325	10.4	16.2499	21.0166	23.0744	16.2496	21.7745	20.4745	27.9493	21.4495	20.1495
1326	11.05	16.2499	21.2333	22.4244	15.9246	21.7745	20.1495	27.2993	20.4745	20.4745
1327	11.2666	16.0333	21.0166	22.4244	15.9246	21.7745	20.1495	27.2993	20.7995	20.1495
1328	10.8333	16.2499	21.2333	22.4244	16.2496	21.7745	20.4745	27.9493	20.7995	20.1495
1329	11.05	16.0333	21.2333	22.7494	15.9246	22.0994	20.4745	27.9493	21.4495	20.4745
1330	11.05	16.2499	21.2333	22.7494	16.2496	21.7745	20.1495	27.2993	20.4745	20.4745
1331	11.05	16.2499	21.2333	22.7494	16.2496	21.7745	20.1495	27.2993	21.1245	20.4745
1332	10.6166	15.8166	21.0166	22.7494	15.9246	21.4495	20.4745	27.6243	21.1245	20.4745
1333	11.05	16.2499	21.0166	22.7494	16.2496	22.0994	20.4745	28.2743	20.7995	20.1495
1334	11.05	16.4666	21.0166	22.4244	16.2496	21.7745	20.1495	27.6243	21.4495	20.4745
1335	11.05	16.2499	21.4499	22.7494	15.9246	21.7745	20.1495	27.6243	21.1245	20.4745
1336	10.8333	16.0333	21.0166	22.7494	16.2496	21.7745	20.4745	27.6243	21.1245	20.1495
1337	11.05	16.2499	21.0166	22.7494	16.5746	21.7745	20.1495	27.6243	21.7745	20.1495
1338	11.05	16.4666	21.2333	22.7494	15.9246	21.4495	20.4745	27.9493	21.1245	20.4745
1339	10.4	16.0333	21.4499	22.4244	15.9246	21.7745	20.4745	27.6243	20.7995	20.4745
1340	11.4833	16.0333	21.0166	22.7494	16.2496	21.7745	20.1495	27.6243	20.7995	20.4745
1341	11.2666	16.2499	21.0166	22.4244	16.2496	22.0994	20.1495	27.6243	20.7995	20.1495
1342	11.05	16.2499	21.2333	22.7494	16.2496	21.7745	20.4745	27.9493	20.7995	19.8245
1343	11.4833	16.4666	21.2333	22.7494	16.2496	22.0994	20.4745	27.6243	21.4495	20.1495
1344	11.2666	16.2499	21.0166	22.7494	15.9246	21.7745	20.7995	27.6243	20.7995	20.1495
1345	10.8333	16.4666	21.0166	22.7494	15.5996	22.0994	20.7995	28.2743	20.7995	20.1495
1346	10.6166	16.0333	21.0166	22.7494	16.2496	22.0994	20.1495	27.9493	20.4745	20.1495
1347	11.05	16.4666	21.2333	22.7494	15.9246	22.0994	19.4995	27.6243	20.7995	20.1495
1348	11.05	16.4666	21.2333	22.7494	16.2496	22.4244	20.4745	27.9493	21.1245	20.1495
1349	10.8333	16.4666	21.0166	23.0744	16.2496	22.0994	20.1495	27.6243	20.4745	20.1495
1350	11.05	16.2499	21.4499	23.0744	16.5746	22.0994	20.1495	27.2993	20.1495	20.1495
1351	11.05	16.4666	21.0166	23.0744	16.5746	22.4244	20.4745	27.6243	21.1245	20.7995
1352	11.05	16.4666	21.4499	23.0744	16.2496	22.0994	20.4745	27.6243	20.1495	20.1495
1353	10.8333	16.2499	21.0166	23.0744	16.2496	22.0994	20.1495	27.6243	21.1245	20.1495
1354	11.05	16.2499	21.2333	23.0744	16.5746	22.0994	20.1495	27.6243	20.7995	20.1495
1355	10.8333	16.0333	21.2333	23.0744	16.2496	22.4244	20.4745	27.9493	20.4745	19.8245
1356	11.2666	16.2499	21.2333	23.0744	16.5746	22.4244	20.4745	27.6243	20.4745	20.1495
1357	11.05	16.2499	21.2333	23.0744	16.2496	22.0994	20.4745	27.9493	20.4745	20.4745
1358	11.2666	16.2499	21.4499	22.7494	16.2496	22.4244	19.8245	27.6243	20.7995	19.8245
1359	11.2666	16.2499	21.4499	23.0744	16.2496	22.0994	19.8245	27.9493	21.4495	20.1495
1360	10.6166	16.0333	21.2333	23.0744	15.9246	22.4244	20.1495	27.6243	21.1245	20.1495
1361	11.05	16.2499	21.4499	23.0744	15.9246	22.4244	20.4745	27.2993	19.8245	20.1495
1362	11.05	16.2499	21.2333	23.0744	16.2496	22.7494	20.1495	27.6243	20.7995	20.1495
1363	11.05	16.4666	21.2333	23.0744	16.2496	22.7494	20.1495	27.9493	20.1495	19.8245
1364	11.05	16.2499	21.2333	23.0744	16.2496	22.7494	20.4745	27.6243	20.4745	20.1495
1365	11.2666	16.4666	21.4499	23.0744	16.2496	22.0994	20.1495	27.6243	20.4745	19.8245
1366	11.2666	16.2499	21.2333	23.0744	15.9246	22.4244	19.8245	27.6243	20.4745	20.1495
1367	11.2666	16.2499	21.2333	23.0744	16.2496	22.7494	20.1495	27.9493	20.4745	20.1495
1368	10.8333	16.6833	21.2333	23.0744	16.2496	22.7494	20.1495	27.9493	20.4745	20.1495
1369	11.2666	16.2499	21.4499	23.0744	15.9246	22.4244	19.8245	27.6243	21.1245	20.1495
1370	10.4	16.2499	21.2333	23.0744	16.5746	23.0744	20.1495	27.9493	20.7995	20.1495
1371	11.05	16.2499	21.4499	22.7494	16.5746	22.7494	20.1495	27.6243	20.4745	20.1495
1372	11.2666	16.2499	21.2333	23.0744	16.2496	22.7494	20.4745	27.9493	21.1245	20.1495
1373	10.8333	16.2499	21.2333	23.0744	16.5746	22.7494	20.1495	27.9493	20.7995	20.4745
1374	11.05	16.2499	21.2333	23.0744	16.2496	22.7494	20.1495	27.6243	20.4745	19.8245
1375	11.05	16.2499	21.0166	23.0744	15.9246	22.7494	20.1495	27.2993	20.7995	20.1495
1376	11.05	16.2499	21.2333	23.0744	16.2496	22.7494	20.1495	27.9493	20.7995	20.1495
1377	10.8333	16.0333	21.2333	23.0744	15.9246	22.4244	20.4745	27.6243	21.4495	19.8245
1378	10.8333	16.2499	21.4499	23.0744	16.2496	22.7494	20.4745	28.2743	20.1495	20.1495
1379	11.2666	16.2499	21.2333	23.0744	16.2496	22.7494	20.4745	27.6243	21.4495	20.1495
1380	10.8333	16.2499	21.4499	23.0744	16.2496	22.4244	20.1495	27.9493	20.4745	20.1495
1381	11.05	16.2499	21.2333	23.0744	16.2496	22.7494	20.1495	28.2743	21.4495	20.1495
1382	10.8333	16.2499	21.4499	23.0744	15.9246	22.7494	20.4745	27.6243	20.7995	20.1495
1383	11.4833	16.2499	21.2333	23.0744	16.2496	22.7494	20.1495	27.9493	20.7995	20.1495
1384	10.4	16.2499	21.0166	23.0744	16.2496	22.4244	19.8245	27.6243	20.1495	20.1495
1385	10.6166	16.4666	21.0166	23.0744	16.2496	22.4244	19.8245	26.9743	20.4745	20.1495
1386	10.8333	16.2499	21.2333	23.0744	16.2496	22.7494	20.1495	27.6243	20.1495	20.1495
1387	10.8333	16.2499	21.0166	23.0744	16.2496	22.7494	19.8245	27.6243	20.4745	20.1495
1388	10.1833	16.0333	21.4499	23.0744	16.8996	22.7494	20.1495	27.6243	21.1245	20.4745
1389	10.6166	16.2499	21.2333	23.0744	16.8996	22.4244	19.8245	27.9493	21.1245	20.1495
1390	11.05	16.2499	21.0166	23.0744	16.5746	22.7494	20.1495	27.6243	21.7745	20.4745
1391	10.6166	16.2499	20.7999	23.0744	16.5746	22.4244	19.8245	28.2743	20.4745	20.1495
1392	11.05	16.2499	21.2333	23.0744	16.5746	22.7494	20.1495	27.6243	21.7745	20.1495
1393	11.05	16.2499	21.2333	23.0744	16.2496	22.7494	20.1495	27.9493	21.1245	20.4745
1394	11.2666	16.2499	21.0166	23.0744	16.5746	22.7494	20.4745	27.2993	21.7745	20.1495
1395	11.4833	16.4666	21.0166	23.0744	16.2496	22.7494	20.1495	27.6243	20.1495	20.1495
1396	10.8333	16.4666	21.2333	23.0744	15.9246	22.4244	20.4745	27.9493	21.4495	20.1495
1397	11.05	16.0333	21.0166	23.0744	16.5746	22.4244	19.8245	27.9493	22.0994	20.7995
1398	11.05	16.0333	20.7999	23.0744	16.8996	22.7494	20.7995	27.9493	21.7745	20.1495
1399	10.8333	16.4666	20.7999	23.0744	16.2496	22.4244	20.4745	27.2993	20.7995	20.1495
1400	11.05	16.2499	20.7999	23.0744	16.5746	22.7494	20.4745	28.2743	21.1245	20.4745
1401	11.2666	16.2499	21.0166	22.7494	16.5746	22.0994	19.8245	27.6243	21.1245	19.8245
1402	11.2666	16.2499	21.0166	22.7494	16.8996	22.4244	19.8245	27.6243	21.1245	20.1495
1403	11.05	15.8166	20.7999	23.0744	16.8996	22.7494	20.4745	27.6243	21.7745	20.4745
1404	10.8333	16.0333	20.7999	22.7494	16.5746	22.4244	19.8245	27.6243	21.4495	20.1495
1405	10.8333	16.0333	21.0166	22.7494	16.8996	22.7494	20.1495	28.5993	21.7745	20.1495
1406	11.4833	16.2499	20.7999	23.0744	16.5746	22.4244	19.8245	27.6243	22.0994	19.8245
1407	11.05	16.2499	21.0166	23.0744	16.5746	22.4244	20.1495	27.2993	21.1245	20.4745
1408	11.2666	16.2499	20.7999	23.0744	16.8996	22.4244	20.1495	28.2743	21.4495	20.4745
1409	11.4833	16.4666	21.0166	22.7494	16.8996	22.4244	20.1495	27.9493	21.1245	19.8245
1410	10.8333	16.2499	20.7999	23.0744	16.5746	22.4244	20.4745	27.6243	21.4495	20.1495
1411	11.4833	16.4666	21.0166	23.0744	16.2496	22.4244	20.4745	27.9493	21.1245	19.8245
1412	11.05	16.4666	20.7999	23.0744	16.5746	21.7745	19.8245	28.2743	20.7995	20.1495
1413	10.8333	16.4666	21.0166	23.0744	16.5746	22.0994	19.8245	27.9493	21.7745	20.1495
1414	10.6166	16.2499	21.2333	23.0744	16.5746	22.4244	20.1495	27.9493	22.4244	19.8245
1415	11.2666	16.4666	21.0166	22.7494	16.5746	22.7494	20.7995	28.2743	21.4495	19.8245
1416	11.05	16.4666	21.2333	23.0744	16.8996	22.4244	20.1495	27.9493	21.7745	20.1495
1417	10.8333	16.0333	20.7999	23.0744	16.5746	22.4244	19.8245	28.2743	21.7745	20.1495
1418	10.4	16.4666	21.0166	23.0744	16.5746	22.4244	19.8245	27.9493	21.4495	20.4745
1419	10.8333	16.4666	20.7999	23.0744	16.2496	22.4244	19.8245	27.9493	21.7745	20.4745
1420	10.6166	16.4666	21.0166	23.0744	16.2496	22.4244	19.4995	28.2743	21.4495	20.1495
1421	11.05	16.0333	21.2333	23.0744	16.2496	22.4244	20.4745	27.9493	22.0994	20.1495
1422	10.8333	16.0333	21.2333	23.0744	16.5746	21.7745	19.1745	27.6243	21.7745	19.8245
1423	11.05	16.4666	21.0166	23.0744	17.2246	22.4244	19.8245	27.9493	21.7745	20.1495
1424	10.8333	16.4666	21.0166	23.0744	16.5746	22.4244	20.1495	28.2743	21.7745	20.1495
1425	10.6166	16.2499	21.2333	23.0744	16.5746	21.7745	20.4745	27.6243	21.4495	19.8245
1426	11.2666	16.4666	21.2333	22.7494	16.5746	22.4244	19.8245	28.2743	19.8245	20.1495
1427	10.8333	16.2499	21.2333	23.0744	17.2246	22.4244	20.4745	27.2993	20.7995	19.8245
1428	10.8333	16.4666	21.0166	23.0744	17.2246	22.4244	19.8245	27.6243	20.1495	20.1495
1429	10.8333	16.4666	21.2333	22.7494	16.5746	22.0994	20.1495	28.5993	21.7745	20.1495
1430	11.05	16.2499	20.7999	23.0744	16.5746	22.0994	20.1495	28.5993	20.1495	20.4745
1431	10.4	16.2499	21.0166	23.0744	16.5746	22.7494	20.1495	27.9493	20.7995	20.1495
1432	11.05	16.6833	21.0166	23.0744	16.5746	22.0994	20.4745	27.6243	20.4745	20.1495
1433	11.2666	16.2499	21.2333	23.0744	16.2496	22.4244	20.4745	28.2743	21.1245	20.1495
1434	10.8333	16.2499	20.7999	23.0744	16.5746	22.4244	20.1495	27.6243	21.1245	19.8245
1435	10.8333	16.4666	21.0166	23.0744	16.5746	22.4244	20.1495	27.9493	20.7995	20.4745
1436	10.1833	16.4666	21.0166	23.0744	16.5746	22.4244	20.4745	28.2743	20.7995	20.4745
1437	10.6166	16.2499	21.0166	22.7494	16.2496	22.0994	20.1495	28.5993	21.1245	19.8245
1438	10.6166	16.0333	21.0166	23.0744	16.5746	22.4244	20.1495	28.5993	21.4495	20.1495
1439	10.6166	16.2499	21.0166	23.0744	16.2496	22.4244	20.1495	27.2993	20.7995	19.8245
1440	10.8333	16.4666	21.0166	23.0744	16.5746	22.0994	19.8245	27.9493	21.7745	19.8245
1441	10.8333	16.2499	21.2333	23.0744	16.5746	22.7494	20.1495	28.2743	21.4495	19.8245
1442	11.05	16.2499	21.0166	23.0744	16.2496	22.4244	20.1495	27.9493	21.7745	19.8245
1443	10.8333	16.0333	21.0166	23.0744	16.2496	22.4244	20.1495	27.9493	21.1245	20.1495
1444	10.6166	16.2499	21.0166	22.7494	16.8996	22.4244	20.1495	26.9743	21.7745	19.8245
1445	10.4	16.2499	21.2333	23.0744	16.2496	22.7494	20.4745	28.2743	21.1245	19.8245
1446	11.2666	16.2499	21.0166	23.0744	16.5746	22.7494	19.8245	27.9493	20.7995	20.1495
1447	11.2666	16.4666	21.2333	23.0744	16.5746	22.7494	19.8245	28.2743	21.7745	20.1495
1448	10.8333	16.2499	21.0166	23.0744	16.8996	22.7494	19.8245	27.6243	22.0994	19.4995
1449	11.05	16.4666	21.2333	23.0744	16.8996	22.4244	20.1495	27.2993	21.4495	19.8245
1450	11.05	16.4666	21.0166	23.0744	16.5746	22.7494	20.4745	28.2743	21.1245	19.8245
1451	11.05	16.4666	21.2333	23.0744	17.2246	22.7494	20.4745	27.9493	21.7745	20.1495
1452	10.4	16.2499	21.0166	23.0744	16.5746	22.4244	20.4745	28.2743	21.7745	20.1495
1453	10.8333	16.4666	21.0166	23.0744	16.5746	22.7494	20.1495	27.9493	21.1245	20.1495
1454	11.4833	16.0333	21.0166	23.0744	16.5746	22.7494	19.8245	28.5993	21.4495	20.1495
1455	10.8333	16.2499	21.0166	23.0744	16.2496	22.7494	20.7995	28.5993	22.0994	20.4745
1456	10.4	16.2499	21.0166	22.7494	16.2496	22.4244	20.7995	28.2743	21.4495	20.1495
1457	11.2666	15.8166	21.0166	23.0744	16.2496	22.4244	20.4745	27.9493	21.1245	19.8245
1458	11.05	16.0333	21.0166	22.7494	16.5746	22.0994	20.1495	27.6243	21.4495	20.1495
1459	10.6166	16.2499	21.2333	23.0744	16.5746	22.4244	19.4995	27.9493	21.7745	20.1495
1460	10.6166	16.2499	21.0166	23.0744	16.5746	22.4244	19.8245	28.5993	21.1245	20.1495
1461	10.8333	16.0333	21.0166	23.0744	16.5746	22.4244	20.4745	28.2743	21.1245	20.1495
1462	10.8333	16.2499	21.2333	23.0744	16.8996	22.0994	20.1495	27.9493	21.4495	19.8245
1463	11.05	16.0333	21.0166	22.7494	16.8996	22.4244	20.1495	27.9493	20.7995	20.4745
1464	11.2666	15.8166	21.2333	23.0744	16.5746	22.0994	20.4745	27.9493	21.1245	20.4745
1465	11.05	16.0333	20.7999	22.7494	16.5746	22.4244	20.1495	27.6243	21.4495	20.1495
1466	10.1833	16.0333	21.0166	22.7494	16.8996	22.0994	20.4745	27.9493	21.4495	19.8245
1467	11.05	16.2499	20.7999	23.0744	16.5746	22.0994	20.1495	27.6243	21.4495	20.1495
1468	11.2666	16.2499	21.0166	23.0744	16.5746	22.4244	20.1495	28.2743	21.7745	20.1495
1469	11.05	16.4666	21.2333	23.0744	16.5746	22.4244	20.4745	27.9493	21.7745	19.8245
1470	11.05	16.0333	21.2333	23.0744	16.2496	22.4244	20.1495	28.2743	21.1245	20.1495
1471	10.8333	16.2499	20.7999	23.0744	16.5746	22.7494	19.8245	27.9493	21.7745	20.4745
1472	10.8333	16.0333	20.7999	22.7494	16.5746	22.4244	19.4995	27.9493	21.4495	20.1495
1473	11.05	16.2499	20.5833	23.0744	16.5746	22.4244	20.4745	27.9493	21.4495	19.8245
1474	10.8333	16.0333	21.0166	23.0744	16.5746	22.7494	20.1495	27.6243	21.4495	19.8245
1475	10.8333	16.0333	20.7999	23.0744	16.8996	22.0994	20.4745	27.9493	21.4495	19.8245
1476	10.1833	16.0333	21.4499	22.4244	16.8996	21.7745	20.1495	27.9493	21.1245	19.8245
1477	10.6166	16.0333	21.2333	23.0744	16.5746	23.0744	19.8245	27.9493	21.1245	19.8245
1478	10.6166	16.0333	21.2333	22.7494	16.8996	22.0994	20.1495	27.9493	21.4495	20.1495
1479	10.8333	16.0333	21.0166	22.4244	16.8996	22.4244	20.4745	27.9493	21.4495	20.1495
1480	11.05	16.0333	21.2333	23.0744	16.8996	22.7494	20.1495	27.6243	21.4495	19.8245
1481	11.05	15.8166	20.7999	23.0744	16.8996	22.4244	20.4745	27.6243	21.4495	20.4745
1482	11.2666	16.2499	21.2333	23.0744	16.5746	22.4244	19.8245	27.6243	21.4495	20.1495
1483	10.6166	16.0333	21.0166	23.0744	16.5746	22.7494	20.1495	27.9493	21.1245	20.1495
1484	10.4	16.0333	21.2333	22.7494	16.8996	22.7494	19.8245	27.2993	21.4495	20.1495
1485	10.6166	16.0333	20.7999	23.0744	16.8996	22.4244	20.4745	27.6243	21.4495	19.8245
1486	10.6166	16.0333	21.0166	23.0744	16.5746	22.7494	20.1495	27.9493	20.7995	19.8245
1487	10.8333	16.0333	21.2333	23.0744	16.8996	22.0994	19.8245	27.9493	21.7745	19.8245
1488	10.6166	16.2499	21.0166	23.0744	17.2246	22.4244	20.1495	27.9493	20.7995	19.8245
1489	10.1833	16.0333	21.2333	23.0744	16.8996	22.4244	20.1495	27.9493	20.7995	20.1495
1490	10.4	16.0333	21.4499	23.0744	16.5746	22.0994	20.1495	27.9493	21.1245	20.1495
1491	10.8333	16.0333	21.0166	23.0744	16.5746	22.0994	19.8245	28.5993	21.1245	20.1495
1492	10.6166	16.0333	21.0166	22.7494	16.8996	22.0994	20.1495	27.9493	21.7745	20.1495
1493	11.05	15.8166	21.2333	23.0744	16.8996	22.4244	19.8245	27.2993	21.1245	19.8245
1494	11.2666	16.2499	20.7999	23.0744	16.8996	22.7494	19.8245	27.6243	21.1245	20.4745
1495	10.1833	16.4666	21.0166	23.0744	16.8996	22.4244	20.1495	27.6243	20.7995	20.7995
1496	11.05	16.2499	21.0166	23.0744	16.8996	22.7494	20.1495	27.9493	21.4495	20.1495
1497	10.4	16.2499	21.2333	22.7494	16.5746	22.4244	19.8245	28.2743	21.4495	20.1495
1498	11.05	16.0333	21.0166	23.0744	17.2246	22.4244	20.4745	27.6243	21.4495	20.4745
1499	11.05	16.0333	20.7999	22.7494	17.2246	22.7494	20.1495	27.6243	21.1245	20.1495
1500	10.6166	16.0333	21.4499	23.0744	17.2246	22.7494	19.8245	27.9493	22.0994	20.1495
1501	11.05	16.2499	21.0166	23.0744	16.5746	22.7494	20.1495	27.9493	22.4244	20.4745
1502	11.05	16.2499	21.2333	23.0744	16.2496	22.4244	19.8245	27.6243	21.7745	20.4745
1503	10.8333	15.8166	21.0166	23.0744	16.5746	22.0994	20.1495	27.6243	22.0994	19.8245
1504	10.8333	16.0333	21.2333	23.0744	17.2246	22.4244	20.4745	27.9493	20.4745	19.8245
1505	10.8333	16.0333	21.2333	23.0744	17.2246	22.7494	20.1495	27.9493	22.4244	20.4745
1506	10.8333	16.2499	20.7999	23.0744	16.8996	22.4244	19.4995	27.2993	21.7745	20.1495
1507	11.05	15.8166	21.0166	23.0744	16.8996	22.7494	20.1495	27.9493	22.0994	20.4745
1508	10.8333	16.2499	21.0166	23.0744	16.5746	22.4244	19.8245	27.9493	22.0994	20.4745
1509	10.1833	15.8166	20.7999	23.0744	16.5746	22.7494	19.8245	27.9493	22.0994	20.4745
1510	11.2666	15.8166	21.2333	23.0744	16.5746	22.0994	20.1495	27.6243	21.7745	20.1495
1511	11.7	16.2499	21.2333	23.0744	16.5746	22.7494	19.8245	27.6243	22.4244	20.4745
1512	10.8333	16.2499	21.2333	22.7494	16.5746	22.0994	19.4995	27.9493	22.0994	20.4745
1513	10.8333	16.2499	21.0166	23.0744	16.5746	22.4244	20.1495	28.2743	22.0994	19.8245
1514	10.8333	16.0333	21.4499	23.0744	16.8996	22.0994	19.4995	27.9493	22.4244	19.8245
1515	10.4	16.0333	21.2333	23.0744	16.5746	22.0994	19.4995	28.2743	22.0994	20.1495
1516	10.8333	15.8166	21.4499	23.0744	16.8996	22.0994	19.8245	28.2743	22.4244	20.1495
1517	10.8333	16.0333	21.2333	23.0744	16.2496	22.0994	19.8245	28.5993	22.0994	20.1495
1518	10.8333	16.2499	21.2333	23.0744	16.5746	22.4244	19.8245	27.9493	22.0994	20.1495
1519	10.8333	16.2499	21.0166	23.0744	16.2496	22.0994	19.8245	27.9493	22.0994	20.1495
1520	10.6166	16.2499	21.2333	22.7494	16.5746	22.4244	20.1495	27.9493	22.4244	19.8245
1521	11.05	15.8166	21.2333	23.0744	16.5746	22.4244	20.1495	27.9493	22.4244	20.1495
1522	10.1833	16.2499	21.2333	23.0744	15.9246	22.0994	20.1495	27.9493	22.0994	20.1495
1523	11.05	15.8166	21.2333	22.7494	16.5746	21.7745	19.4995	27.9493	22.4244	19.8245
1524	11.2666	15.8166	21.2333	23.0744	16.2496	21.7745	20.1495	27.6243	22.0994	19.8245
1525	11.05	16.0333	21.2333	23.0744	16.5746	21.7745	20.4745	27.9493	22.0994	19.8245
1526	10.1833	16.0333	21.4499	22.7494	16.5746	22.0994	19.8245	27.6243	22.0994	19.8245
1527	10.6166	16.0333	21.2333	23.0744	16.2496	21.7745	20.1495	27.9493	22.0994	20.1495
1528	11.2666	16.0333	21.2333	23.0744	15.9246	22.4244	19.4995	27.9493	22.0994	20.1495
1529	10.6166	15.8166	21.2333	23.0744	16.8996	22.0994	19.8245	28.2743	22.0994	20.1495
1530	10.8333	16.0333	21.2333	23.0744	15.9246	22.4244	19.8245	27.9493	22.4244	19.8245
1531	10.6166	16.0333	21.2333	23.3994	16.2496	22.4244	20.4745	27.9493	22.0994	20.1495
1532	11.2666	16.0333	21.2333	23.0744	16.2496	22.4244	20.1495	27.9493	22.4244	20.1495
1533	11.2666	16.0333	21.2333	23.0744	16.2496	22.7494	20.4745	27.6243	22.4244	20.1495
1534	11.05	16.0333	21.2333	23.3994	16.5746	22.0994	20.1495	28.5993	22.0994	20.1495
1535	11.2666	16.2499	21.0166	23.3994	16.5746	22.4244	19.8245	28.5993	22.0994	20.1495
1536	11.05	16.0333	21.0166	23.3994	16.2496	22.7494	19.8245	28.2743	22.4244	20.4745
1537	11.05	16.0333	21.2333	23.0744	16.5746	22.7494	20.4745	27.9493	22.0994	20.1495
1538	10.8333	16.0333	20.7999	23.0744	16.5746	22.4244	20.4745	27.9493	22.0994	20.1495
1539	10.8333	16.0333	21.0166	23.3994	16.2496	21.7745	19.8245	28.2743	22.0994	20.1495
1540	10.8333	16.0333	20.7999	23.3994	16.2496	22.0994	20.4745	27.9493	22.4244	20.1495
1541	11.2666	16.0333	21.2333	23.3994	16.2496	22.0994	19.8245	27.9493	22.0994	20.4745
1542	10.6166	16.0333	21.2333	23.0744	15.9246	22.0994	19.8245	27.9493	22.0994	20.1495
1543	10.4	16.0333	21.0166	23.3994	16.5746	22.7494	20.1495	28.2743	22.4244	20.1495
1544	10.6166	16.0333	21.0166	23.3994	15.9246	22.4244	19.8245	27.6243	22.0994	20.1495
1545	11.05	16.2499	21.0166	23.3994	15.9246	22.0994	20.4745	27.9493	22.0994	20.1495
1546	11.2666	16.0333	21.0166	23.3994	16.2496	22.0994	20.4745	28.5993	22.0994	19.8245
1547	10.4	16.0333	21.0166	23.3994	16.2496	22.0994	20.4745	27.9493	22.0994	20.1495
1548	11.2666	16.0333	20.5833	23.3994	16.2496	22.4244	20.1495	27.9493	22.0994	19.8245
1549	10.8333	16.0333	21.0166	23.3994	15.9246	22.0994	19.8245	27.9493	22.0994	19.8245
1550	10.8333	16.0333	21.0166	23.3994	15.9246	21.7745	20.1495	27.9493	21.7745	19.8245
1551	10.6166	16.0333	21.2333	23.0744	15.9246	22.0994	20.1495	27.6243	22.0994	19.8245
1552	10.4	16.0333	20.5833	23.3994	16.5746	22.4244	19.4995	28.2743	22.0994	20.4745
1553	10.4	15.5999	20.7999	23.3994	15.9246	22.0994	20.1495	27.9493	21.7745	20.4745
1554	11.4833	16.0333	20.7999	23.0744	15.9246	22.4244	20.4745	27.9493	22.0994	20.1495
1555	11.2666	16.0333	20.5833	23.3994	15.9246	22.4244	20.1495	27.6243	22.0994	20.1495
1556	10.6166	16.2499	20.7999	23.3994	15.5996	22.4244	19.8245	28.9243	22.4244	19.8245
1557	11.2666	16.0333	20.7999	23.3994	15.9246	22.4244	20.1495	28.2743	22.0994	20.1495
1558	11.2666	16.2499	20.5833	23.0744	16.2496	22.0994	20.7995	27.9493	22.0994	20.1495
1559	10.8333	16.0333	21.0166	23.3994	15.9246	22.0994	20.1495	27.6243	22.0994	20.1495
1560	10.8333	16.0333	20.7999	23.0744	15.5996	21.7745	19.4995	28.2743	22.4244	20.1495
1561	10.8333	16.0333	20.7999	23.3994	15.9246	21.7745	19.8245	27.6243	22.4244	20.1495
1562	11.4833	16.2499	20.7999	23.0744	15.9246	22.0994	20.4745	28.2743	22.0994	19.8245
1563	11.05	16.0333	20.7999	23.0744	15.9246	21.7745	20.4745	28.2743	22.0994	20.1495
1564	11.2666	16.0333	20.7999	23.3994	16.2496	22.0994	20.4745	28.2743	22.0994	19.8245
1565	10.6166	16.0333	20.7999	23.0744	16.2496	22.0994	20.4745	28.2743	22.0994	19.8245
1566	11.2666	16.0333	20.7999	23.3994	16.2496	21.7745	20.4745	27.9493	22.0994	20.1495
1567	10.4	16.0333	20.7999	23.0744	15.2746	22.4244	20.4745	27.9493	22.0994	20.1495
1568	10.8333	16.0333	21.0166	23.0744	15.5996	22.0994	19.8245	27.9493	22.0994	20.1495
1569	11.4833	16.0333	20.7999	23.3994	15.9246	22.0994	20.4745	28.5993	22.0994	20.1495
1570	11.05	16.0333	20.7999	23.0744	16.2496	21.7745	20.1495	27.9493	21.7745	20.1495
1571	10.6166	16.2499	20.5833	23.3994	15.9246	22.0994	20.1495	27.9493	22.0994	20.1495
1572	11.4833	16.2499	20.7999	23.3994	15.5996	22.4244	20.1495	27.9493	22.4244	20.1495
1573	10.8333	16.2499	21.0166	23.0744	15.9246	22.0994	21.1245	28.2743	22.0994	20.1495
1574	11.2666	16.0333	20.7999	23.0744	15.9246	22.0994	20.4745	28.5993	22.0994	20.1495
1575	11.05	16.2499	20.7999	23.0744	15.9246	22.0994	20.1495	28.2743	22.0994	19.8245
1576	11.05	16.2499	20.7999	23.0744	15.9246	21.7745	20.1495	27.6243	21.7745	20.1495
1577	11.2666	16.2499	20.5833	23.0744	15.5996	21.7745	19.8245	28.2743	22.0994	20.1495
1578	11.05	16.2499	21.0166	23.3994	15.9246	22.0994	20.1495	27.9493	22.4244	20.1495
1579	10.8333	16.0333	20.7999	23.0744	15.9246	22.0994	20.1495	28.2743	22.0994	20.4745
1580	11.4833	16.2499	21.0166	23.3994	15.5996	21.7745	20.4745	27.9493	22.4244	20.1495
1581	11.4833	16.2499	21.0166	23.3994	15.9246	22.0994	20.1495	28.5993	21.7745	20.1495
1582	11.05	16.2499	20.5833	23.3994	16.2496	22.0994	19.4995	28.5993	21.7745	19.8245
1583	11.05	16.0333	20.7999	23.3994	15.9246	22.0994	20.7995	28.5993	22.0994	20.1495
1584	10.6166	16.4666	20.7999	23.3994	15.9246	21.7745	20.4745	28.2743	22.0994	20.1495
1585	11.05	16.0333	21.0166	23.0744	16.2496	22.0994	20.1495	27.9493	22.0994	20.1495
1586	10.6166	16.2499	21.2333	23.3994	15.2746	22.0994	20.4745	27.9493	22.0994	19.8245
1587	11.05	16.2499	21.0166	23.3994	15.9246	21.7745	20.1495	28.2743	22.0994	20.1495
1588	11.05	16.2499	21.0166	23.0744	15.5996	21.7745	20.4745	28.2743	22.0994	20.1495
1589	10.8333	16.0333	21.0166	23.0744	16.2496	21.7745	20.1495	28.5993	22.0994	20.7995
1590	11.2666	16.2499	21.2333	23.0744	16.2496	22.0994	20.4745	27.9493	21.7745	20.1495
1591	11.2666	16.2499	21.2333	23.3994	15.9246	22.0994	20.4745	28.2743	22.4244	20.1495
1592	11.05	16.2499	21.2333	23.0744	15.9246	22.4244	20.1495	28.2743	22.0994	20.1495
1593	11.05	16.0333	21.2333	23.0744	15.5996	22.4244	20.4745	28.2743	22.0994	20.1495
1594	10.6166	16.2499	21.0166	23.0744	16.2496	22.4244	20.1495	28.2743	22.0994	20.7995
1595	11.4833	16.0333	21.2333	23.0744	16.2496	22.4244	20.1495	28.5993	21.7745	20.4745
1596	11.2666	16.4666	20.7999	23.0744	16.5746	21.7745	20.7995	28.2743	22.0994	20.1495
1597	11.2666	16.2499	20.7999	23.3994	16.2496	22.0994	20.1495	28.2743	21.7745	19.8245
1598	11.2666	16.4666	21.0166	23.0744	16.2496	22.0994	20.1495	27.9493	22.4244	20.1495
1599	10.8333	16.2499	21.0166	23.0744	16.5746	21.7745	20.4745	28.5993	22.0994	20.1495
1600	10.8333	16.4666	20.7999	23.0744	16.2496	21.7745	21.1245	27.9493	22.0994	20.1495
1601	10.8333	16.4666	21.0166	23.0744	16.2496	22.0994	20.4745	28.2743	22.4244	20.1495
1602	10.8333	16.2499	21.0166	23.0744	16.2496	22.4244	20.1495	28.5993	22.0994	20.1495
1603	10.8333	16.4666	21.0166	23.0744	16.8996	21.7745	20.1495	28.2743	22.4244	20.4745
1604	11.2666	16.4666	21.0166	23.0744	16.8996	21.7745	19.8245	27.9493	22.4244	20.1495
1605	11.2666	16.4666	21.2333	23.3994	16.2496	22.0994	20.4745	27.9493	22.4244	20.1495
1606	10.8333	16.4666	20.7999	23.3994	16.2496	21.1245	20.4745	28.2743	22.4244	20.1495
1607	10.4	16.4666	21.0166	23.0744	16.2496	21.4495	20.1495	27.9493	22.4244	20.4745
1608	10.6166	16.4666	21.2333	23.0744	15.9246	21.7745	20.1495	28.5993	22.4244	20.4745
1609	10.8333	16.4666	21.0166	23.3994	15.9246	21.4495	20.1495	27.6243	22.0994	20.4745
1610	11.05	16.4666	20.7999	23.3994	15.9246	22.0994	20.4745	27.9493	22.4244	20.1495
1611	11.05	16.2499	21.2333	23.0744	15.9246	22.4244	20.1495	28.2743	22.0994	20.4745
1612	11.05	16.4666	21.0166	23.0744	16.5746	22.0994	20.7995	27.9493	22.0994	20.7995
1613	11.4833	16.6833	21.0166	23.0744	16.2496	22.0994	20.4745	27.9493	22.4244	20.4745
1614	11.4833	16.4666	21.0166	23.3994	16.2496	22.4244	20.4745	28.5993	22.0994	20.1495
1615	10.8333	16.4666	21.0166	23.0744	15.9246	21.7745	20.4745	28.2743	22.4244	20.7995
1616	10.6166	16.4666	21.0166	23.0744	16.2496	22.0994	20.1495	28.2743	22.4244	20.7995
1617	10.8333	16.4666	21.0166	23.0744	15.9246	22.0994	20.1495	28.2743	22.4244	20.7995
1618	11.2666	16.6833	20.7999	23.0744	16.2496	22.0994	20.1495	27.9493	22.4244	20.1495
1619	10.8333	16.6833	20.7999	23.0744	16.2496	22.4244	20.7995	28.5993	22.4244	20.4745
1620	10.6166	16.4666	21.0166	23.0744	15.5996	22.4244	20.4745	28.2743	22.4244	20.4745
1621	10.4	16.2499	21.0166	23.3994	16.2496	22.0994	19.8245	28.2743	22.4244	21.1245
1622	11.05	16.2499	21.0166	23.3994	15.9246	22.0994	20.4745	28.2743	22.4244	20.7995
1623	10.8333	16.2499	21.0166	23.0744	15.9246	22.4244	20.4745	28.2743	22.0994	20.4745
1624	10.8333	16.2499	21.0166	23.0744	15.9246	22.0994	20.4745	28.2743	21.7745	20.1495
1625	11.05	16.4666	20.7999	23.0744	15.9246	22.4244	20.4745	28.5993	22.0994	20.4745
1626	11.05	16.4666	21.0166	23.0744	15.9246	22.0994	20.1495	27.9493	22.0994	20.7995
1627	11.05	16.4666	20.7999	23.0744	16.2496	22.4244	20.1495	27.6243	22.0994	20.4745
1628	10.8333	16.2499	21.0166	23.3994	16.2496	22.4244	20.1495	28.2743	22.4244	20.4745
1629	10.8333	16.4666	21.0166	23.0744	16.5746	22.7494	20.4745	28.2743	22.0994	20.4745
1630	11.2666	16.4666	21.0166	23.3994	16.2496	22.7494	19.8245	27.9493	21.7745	20.4745
1631	11.05	16.2499	20.7999	23.3994	16.2496	22.4244	20.4745	27.9493	21.7745	20.1495
1632	11.2666	16.0333	21.2333	23.0744	15.9246	22.7494	20.7995	28.2743	21.7745	20.4745
1633	10.6166	16.2499	21.0166	23.0744	15.9246	22.4244	20.1495	28.5993	22.0994	20.4745
1634	11.4833	16.2499	21.0166	23.0744	16.2496	22.4244	20.4745	28.2743	21.7745	20.1495
1635	10.4	16.2499	21.0166	23.0744	16.2496	22.7494	20.1495	27.9493	22.0994	20.4745
1636	10.8333	16.4666	21.0166	23.3994	15.9246	22.4244	21.1245	27.9493	21.7745	20.4745
1637	10.8333	16.2499	20.7999	23.0744	16.2496	22.0994	20.7995	27.9493	22.0994	20.7995
1638	11.2666	16.4666	21.0166	23.0744	16.5746	22.4244	20.1495	27.6243	21.7745	20.4745
1639	10.8333	16.2499	20.7999	23.0744	16.2496	22.0994	20.4745	28.2743	21.7745	20.7995
1640	11.05	16.4666	21.0166	23.0744	16.2496	22.0994	20.7995	28.5993	22.0994	20.1495
1641	10.6166	16.2499	21.0166	23.0744	15.9246	21.7745	20.1495	27.9493	21.7745	20.1495
1642	10.6166	16.4666	21.2333	23.0744	16.2496	22.4244	20.4745	28.2743	22.0994	20.4745
1643	10.8333	16.2499	21.0166	23.0744	16.2496	22.0994	21.1245	28.2743	21.7745	20.1495
1644	11.05	16.2499	21.0166	23.0744	16.2496	22.0994	20.4745	28.2743	21.7745	20.4745
1645	11.2666	16.2499	20.7999	23.0744	16.5746	22.4244	20.1495	28.2743	21.7745	19.4995
1646	10.8333	16.2499	21.0166	23.0744	16.2496	22.4244	19.8245	27.9493	21.7745	20.1495
1647	10.8333	16.0333	21.0166	23.0744	16.2496	22.0994	20.1495	28.2743	21.7745	20.4745
1648	10.6166	16.2499	21.0166	23.3994	16.5746	21.7745	20.1495	27.6243	22.0994	20.4745
1649	11.05	16.2499	21.2333	23.0744	16.2496	22.4244	20.4745	28.2743	21.7745	19.8245
1650	10.4	16.2499	20.7999	23.3994	16.5746	21.7745	20.1495	27.9493	22.0994	19.8245
1651	11.05	16.2499	21.2333	23.3994	16.2496	22.0994	20.4745	28.2743	22.0994	20.1495
1652	10.6166	16.0333	21.0166	23.3994	16.5746	22.4244	19.8245	27.9493	21.7745	20.1495
1653	11.05	16.2499	20.7999	23.0744	16.5746	22.0994	20.7995	27.9493	22.0994	20.1495
1654	10.8333	16.2499	21.2333	23.0744	16.5746	22.4244	20.7995	28.2743	21.7745	20.1495
1655	10.1833	16.2499	20.7999	23.0744	16.2496	22.0994	20.7995	28.2743	21.7745	20.1495
1656	10.8333	16.2499	21.0166	23.0744	16.2496	22.0994	20.1495	27.9493	21.7745	20.1495
1657	11.05	16.4666	21.0166	23.0744	16.2496	22.0994	20.4745	28.2743	21.7745	20.4745
1658	11.05	16.2499	21.0166	23.3994	16.5746	22.4244	20.4745	28.2743	21.7745	20.1495
1659	11.05	16.2499	21.0166	23.0744	16.2496	22.0994	20.4745	28.2743	21.7745	20.1495
1660	11.05	16.0333	21.0166	23.0744	16.2496	22.4244	20.1495	28.2743	22.0994	20.1495
1661	10.8333	16.2499	20.7999	23.0744	16.5746	21.7745	20.4745	28.2743	22.0994	20.1495
1662	11.2666	16.2499	21.0166	23.0744	16.5746	22.0994	20.4745	28.2743	21.7745	20.1495
1663	11.2666	16.4666	21.2333	23.3994	16.2496	22.4244	20.4745	27.9493	21.7745	20.1495
1664	10.6166	16.0333	20.7999	23.0744	16.2496	22.4244	20.4745	28.5993	21.7745	20.4745
1665	10.8333	16.0333	20.7999	23.0744	16.5746	22.0994	20.4745	27.6243	22.0994	20.1495
1666	11.05	16.2499	21.0166	23.0744	16.5746	22.4244	20.7995	27.9493	22.0994	20.1495
1667	11.2666	16.4666	21.0166	23.0744	16.5746	22.4244	20.1495	27.9493	22.0994	20.4745
1668	11.05	16.4666	21.0166	23.0744	16.5746	22.0994	20.4745	27.9493	21.7745	20.1495
1669	11.05	16.2499	21.0166	23.0744	16.5746	22.4244	20.4745	28.2743	22.0994	20.4745
1670	11.05	16.4666	21.0166	23.3994	16.2496	22.7494	20.4745	28.2743	22.0994	20.1495
1671	11.05	16.2499	20.7999	23.0744	16.2496	22.4244	20.4745	28.2743	21.7745	20.4745
1672	10.6166	16.0333	20.7999	23.0744	16.2496	22.4244	20.1495	27.9493	21.7745	20.1495
1673	10.8333	16.2499	20.7999	23.0744	16.2496	22.4244	20.7995	27.9493	22.4244	20.1495
1674	11.05	16.2499	21.0166	23.0744	16.2496	22.4244	20.4745	28.2743	22.0994	19.8245
1675	11.2666	16.2499	21.0166	23.0744	16.2496	22.4244	20.7995	28.2743	22.0994	20.1495
1676	11.05	16.4666	21.2333	23.0744	16.2496	22.4244	20.7995	27.9493	21.7745	19.8245
1677	11.05	16.4666	21.0166	23.0744	16.2496	22.4244	20.1495	28.2743	22.0994	20.4745
1678	11.05	16.2499	21.0166	23.0744	16.2496	22.0994	20.7995	27.6243	22.4244	20.1495
1679	11.2666	16.4666	21.0166	23.3994	16.2496	22.0994	20.4745	27.9493	22.0994	19.8245
1680	11.2666	16.2499	20.7999	23.0744	16.2496	22.4244	20.7995	28.2743	22.0994	19.8245
1681	10.4	16.4666	21.0166	23.0744	16.2496	22.0994	20.1495	27.9493	22.0994	19.8245
1682	10.8333	16.2499	21.0166	23.3994	16.5746	22.0994	20.1495	27.9493	22.0994	20.1495
1683	11.05	16.2499	21.0166	23.3994	16.5746	23.0744	20.4745	27.9493	21.7745	20.1495
1684	10.6166	16.2499	20.7999	23.0744	15.9246	22.4244	20.1495	27.9493	22.0994	20.1495
1685	11.05	16.4666	21.0166	23.0744	16.2496	23.0744	20.1495	27.9493	22.0994	20.4745
1686	10.6166	16.4666	21.0166	23.0744	16.5746	22.7494	20.4745	27.6243	22.7494	20.4745
1687	11.05	16.2499	21.0166	23.3994	16.2496	22.4244	20.7995	28.5993	22.0994	20.1495
1688	10.4	16.0333	21.0166	23.0744	16.2496	22.4244	20.7995	27.6243	22.4244	20.4745
1689	10.6166	16.2499	20.7999	23.0744	16.2496	22.7494	20.7995	27.9493	21.7745	20.4745
1690	10.8333	16.2499	20.7999	23.0744	16.2496	22.0994	20.4745	28.2743	21.7745	20.4745
1691	10.8333	16.2499	21.0166	23.0744	16.2496	22.4244	20.7995	27.6243	21.7745	20.4745
1692	11.7	16.2499	20.7999	23.0744	16.2496	22.4244	20.7995	28.2743	21.7745	20.1495
1693	10.4	16.4666	21.2333	23.3994	16.2496	22.0994	20.7995	27.6243	22.0994	20.4745
1694	10.8333	16.2499	20.7999	23.0744	16.5746	22.4244	20.7995	27.9493	22.0994	20.4745
1695	10.4	16.2499	21.0166	23.0744	16.2496	22.4244	20.7995	28.2743	22.0994	20.4745
1696	10.8333	16.4666	20.7999	23.0744	16.2496	22.4244	20.7995	28.2743	22.0994	20.1495
1697	11.2666	16.2499	20.7999	23.0744	16.5746	22.4244	20.7995	28.2743	22.0994	19.8245
1698	10.8333	16.2499	20.7999	23.3994	16.5746	22.0994	20.7995	27.9493	22.0994	20.1495
1699	11.05	16.2499	20.7999	23.3994	16.2496	22.0994	20.7995	28.5993	22.4244	20.1495
1700	10.4	16.2499	21.0166	23.0744	16.5746	22.7494	21.1245	27.6243	22.0994	20.1495
1701	11.2666	16.2499	20.7999	23.0744	16.5746	22.0994	20.4745	27.6243	22.0994	20.1495
1702	11.4833	16.2499	20.7999	23.0744	16.2496	22.0994	20.7995	27.9493	22.4244	20.1495
1703	10.8333	16.2499	20.7999	23.0744	15.9246	22.4244	20.4745	28.2743	22.0994	19.8245
1704	11.05	16.2499	20.7999	23.0744	16.5746	21.7745	19.8245	28.5993	22.0994	20.1495
1705	10.8333	16.2499	20.7999	23.0744	16.5746	21.7745	20.7995	28.2743	22.0994	20.4745
1706	11.05	16.4666	20.7999	23.0744	16.5746	22.0994	20.4745	27.9493	22.4244	19.8245
1707	11.05	16.2499	20.7999	23.0744	16.2496	22.0994	20.1495	28.2743	21.7745	19.8245
1708	10.6166	16.2499	20.7999	23.0744	16.5746	22.0994	21.1245	27.6243	22.4244	20.1495
1709	11.2666	16.2499	20.7999	23.0744	16.5746	22.0994	20.1495	28.2743	22.4244	20.1495
1710	10.8333	16.4666	21.0166	23.0744	16.2496	21.7745	20.4745	28.5993	22.4244	20.1495
1711	10.6166	16.4666	20.7999	23.0744	16.2496	22.0994	21.1245	28.5993	22.0994	20.1495
1712	10.6166	16.4666	20.7999	23.0744	16.5746	22.0994	19.8245	28.5993	22.0994	19.8245
1713	10.8333	16.2499	20.7999	23.0744	16.5746	21.7745	20.7995	28.5993	22.0994	20.1495
1714	11.4833	16.2499	20.7999	23.0744	16.2496	22.0994	20.7995	27.9493	22.0994	20.1495
1715	11.4833	16.2499	20.7999	23.0744	16.5746	22.0994	21.4495	27.9493	22.4244	20.1495
1716	11.2666	16.2499	20.7999	23.0744	16.5746	22.0994	20.7995	27.9493	22.4244	20.7995
1717	11.2666	16.2499	20.7999	23.0744	16.2496	21.7745	20.7995	28.9243	21.7745	20.4745
1718	10.8333	16.2499	20.7999	23.0744	16.2496	21.7745	20.4745	28.2743	22.0994	20.4745
1719	10.6166	16.0333	21.0166	23.0744	16.5746	21.4495	20.7995	27.2993	22.4244	20.1495
1720	11.05	16.2499	21.0166	23.0744	16.2496	21.7745	20.7995	28.2743	22.7494	20.4745
1721	11.2666	16.2499	21.0166	23.0744	16.2496	22.0994	20.4745	28.2743	21.7745	20.1495
1722	11.4833	16.2499	21.0166	23.0744	16.2496	22.0994	20.4745	28.2743	22.4244	20.1495
1723	10.8333	16.4666	20.7999	23.0744	16.2496	21.7745	20.1495	28.2743	22.0994	20.1495
1724	11.05	16.4666	20.7999	23.0744	16.2496	21.7745	20.4745	27.9493	22.4244	20.1495
1725	11.05	16.0333	20.7999	23.0744	16.2496	21.7745	20.4745	27.6243	22.0994	20.1495
1726	10.8333	16.2499	20.7999	23.0744	16.5746	21.7745	20.7995	28.2743	22.0994	20.1495
1727	11.4833	16.2499	21.2333	23.0744	16.5746	22.0994	20.1495	27.6243	22.7494	20.1495
1728	10.8333	16.2499	21.0166	23.0744	16.2496	22.0994	20.7995	28.2743	22.7494	20.1495
1729	10.8333	16.0333	21.0166	23.0744	16.5746	21.7745	20.4745	27.9493	22.7494	19.8245
1730	10.8333	16.2499	20.7999	23.0744	16.5746	21.7745	20.4745	27.9493	22.7494	19.8245
1731	10.6166	16.2499	21.0166	23.0744	16.8996	22.0994	20.4745	28.2743	22.7494	19.8245
1732	11.05	16.0333	20.7999	23.0744	16.5746	22.0994	20.1495	28.2743	22.4244	19.8245
1733	10.6166	16.4666	21.0166	23.3994	16.2496	21.7745	20.7995	28.9243	22.7494	19.8245
1734	11.05	16.2499	20.7999	23.0744	16.5746	22.0994	20.1495	27.9493	22.0994	19.8245
1735	11.05	16.4666	20.7999	23.0744	16.2496	22.0994	20.1495	28.5993	22.0994	20.1495
1736	11.05	16.0333	20.7999	23.0744	16.8996	22.0994	20.4745	28.2743	22.0994	19.8245
1737	11.4833	16.2499	21.0166	23.0744	16.2496	22.4244	20.4745	28.5993	22.4244	19.8245
1738	10.6166	16.2499	20.7999	23.0744	16.5746	22.4244	20.4745	28.2743	23.0744	19.8245
1739	11.05	16.4666	20.7999	23.0744	16.2496	22.0994	20.4745	28.5993	22.7494	20.1495
1740	10.4	16.0333	20.7999	23.0744	16.2496	22.0994	20.4745	28.5993	22.4244	19.8245
1741	11.05	16.4666	21.0166	23.0744	16.8996	21.4495	20.4745	28.5993	22.0994	19.8245
1742	11.05	16.4666	20.7999	23.0744	16.5746	22.0994	20.7995	28.2743	22.7494	20.1495
1743	11.2666	16.4666	21.0166	23.0744	16.8996	21.7745	20.7995	28.5993	22.7494	20.1495
1744	11.2666	16.4666	20.7999	23.0744	16.5746	21.7745	20.4745	28.2743	22.7494	20.1495
1745	11.05	16.2499	20.7999	23.0744	16.2496	22.0994	20.1495	28.5993	23.0744	20.1495
1746	11.2666	16.2499	20.7999	23.0744	16.5746	21.7745	20.4745	28.5993	23.0744	19.8245
1747	11.05	16.2499	20.7999	23.0744	16.2496	22.0994	20.7995	28.2743	22.7494	20.1495
1748	11.2666	16.2499	20.7999	23.0744	16.2496	22.0994	20.4745	28.2743	22.7494	20.1495
1749	10.8333	16.2499	20.7999	23.0744	16.5746	22.7494	20.4745	28.5993	23.0744	20.1495
1750	10.6166	16.4666	20.7999	23.0744	16.2496	22.0994	20.4745	28.2743	22.4244	20.1495
1751	11.05	16.2499	20.7999	23.3994	16.5746	22.0994	20.7995	27.9493	22.0994	19.8245
1752	11.2666	16.2499	20.7999	23.3994	16.2496	22.7494	19.8245	27.9493	22.4244	20.1495
1753	10.8333	16.2499	20.7999	23.3994	16.2496	22.0994	20.1495	28.2743	22.7494	20.1495
1754	11.05	16.2499	20.7999	23.3994	16.8996	22.0994	19.8245	28.5993	22.4244	20.1495
1755	10.8333	16.4666	20.7999	23.3994	16.5746	21.7745	20.7995	28.5993	22.7494	20.4745
1756	10.8333	16.0333	20.7999	23.3994	16.5746	22.0994	20.4745	27.9493	22.7494	19.8245
1757	11.05	16.2499	20.7999	23.3994	16.2496	22.0994	20.7995	28.2743	22.7494	20.1495
1758	11.05	16.2499	20.7999	23.3994	16.2496	22.0994	20.4745	28.2743	22.4244	20.1495
1759	11.2666	16.2499	20.7999	23.3994	16.2496	22.4244	20.4745	28.2743	22.7494	19.8245
1760	11.2666	16.2499	20.7999	23.3994	16.5746	22.4244	20.7995	28.5993	23.0744	19.8245
1761	10.8333	16.2499	20.7999	23.3994	16.5746	22.4244	20.4745	28.5993	22.4244	19.8245
1762	10.4	16.2499	20.7999	23.3994	16.2496	22.4244	20.7995	28.2743	22.0994	19.4995
1763	10.8333	16.2499	21.0166	23.3994	16.2496	22.4244	20.4745	28.2743	22.7494	19.4995
1764	10.1833	16.2499	20.7999	23.3994	16.2496	22.4244	20.4745	28.5993	23.0744	20.1495
1765	11.2666	16.2499	20.7999	23.3994	16.2496	22.0994	20.4745	28.2743	22.0994	20.1495
1766	10.6166	16.2499	20.7999	23.3994	16.2496	22.4244	20.4745	28.2743	22.7494	20.1495
1767	10.4	16.2499	20.7999	23.3994	16.5746	22.7494	20.4745	27.9493	22.4244	19.8245
1768	10.6166	16.4666	20.7999	23.3994	16.2496	22.4244	20.4745	28.2743	22.7494	19.8245
1769	11.2666	16.2499	20.7999	23.3994	16.2496	22.7494	20.1495	28.2743	22.4244	20.1495
1770	10.8333	16.4666	20.7999	23.3994	16.2496	22.4244	20.4745	28.2743	22.4244	20.1495
1771	11.2666	16.2499	20.7999	23.3994	16.2496	22.4244	20.4745	28.2743	23.0744	20.1495
1772	11.05	16.2499	20.7999	23.3994	16.2496	22.0994	20.7995	28.2743	22.4244	20.1495
1773	11.05	16.0333	20.7999	23.3994	16.2496	22.0994	20.7995	28.2743	23.0744	20.1495
1774	11.4833	16.2499	20.7999	23.3994	16.5746	22.0994	20.4745	28.5993	22.4244	19.8245
1775	11.05	16.2499	20.7999	23.3994	16.2496	22.0994	20.1495	28.9243	23.0744	19.4995
1776	10.8333	16.2499	20.7999	23.3994	16.2496	22.0994	20.1495	28.2743	22.7494	19.8245
1777	10.8333	16.4666	20.5833	23.3994	16.5746	21.7745	20.4745	28.5993	22.7494	19.8245
1778	10.6166	16.2499	20.7999	23.3994	16.5746	22.0994	20.7995	28.2743	22.7494	19.8245
1779	10.8333	16.2499	20.7999	23.3994	16.2496	22.4244	21.1245	28.5993	22.7494	19.8245
1780	10.6166	16.2499	20.7999	23.3994	16.5746	22.0994	20.4745	28.2743	23.3994	19.8245
1781	11.2666	16.2499	20.7999	23.3994	16.5746	21.7745	20.4745	27.9493	23.0744	20.1495
1782	11.05	16.0333	20.7999	23.3994	16.5746	22.0994	20.4745	28.2743	22.7494	19.8245
1783	10.6166	16.4666	21.0166	23.3994	16.8996	21.7745	20.1495	28.2743	22.7494	19.4995
1784	10.6166	16.2499	20.7999	23.3994	16.5746	22.4244	20.1495	28.5993	22.4244	20.1495
1785	10.8333	16.2499	20.7999	23.3994	16.5746	22.0994	20.7995	28.5993	23.3994	20.1495
1786	11.05	16.2499	20.7999	23.3994	16.5746	22.4244	20.1495	27.9493	22.7494	20.1495
1787	11.05	16.2499	20.7999	23.3994	16.2496	22.0994	20.7995	28.5993	23.0744	20.1495
1788	11.05	16.2499	21.0166	23.3994	16.5746	22.0994	20.4745	28.2743	22.4244	19.8245
1789	11.2666	16.2499	21.0166	23.3994	16.5746	21.7745	20.7995	28.2743	22.0994	20.1495
1790	11.05	16.2499	20.7999	23.3994	16.5746	22.0994	20.1495	28.5993	22.4244	20.4745
1791	10.4	16.2499	21.0166	23.3994	16.2496	22.0994	20.7995	28.2743	22.7494	20.1495
1792	10.6166	16.2499	20.7999	23.3994	16.2496	22.0994	21.1245	28.5993	23.0744	20.1495
1793					16.5746	22.4244	20.4745	28.2743	23.0744	20.1495
1794					16.2496	22.4244	20.1495	28.2743	23.3994	20.1495
1795					16.5746	22.4244	20.7995	28.2743	23.0744	20.1495
1796					16.2496	22.7494	21.1245	27.9493	22.7494	19.4995
1797					16.2496	22.4244	21.4495	27.6243	23.3994	19.4995
1798					16.2496	22.7494	20.1495	28.5993	22.7494	19.8245
1799					16.2496	22.7494	20.4745	28.2743	23.0744	20.1495
	BGBV-075_0000	BGBV-106_0000	BGBV-117_0000	BGBV-134_0000	BGBV-253_0000	BGBV-333_0000	BGBV-334_0000	BGBV-355_0000	BGBV-407_0000	BGBV-417_0000
Pulse	10s;20hz;5ms	10s;20hz;5ms	10s;20hz;5ms	10s;20hz;5ms	10s;20hz;5ms	10s;20hz;5ms	10s;20hz;5ms	10s;20hz;5ms	10s;20hz;5ms	10s;20hz;5ms
LED	0.2	0.2	0.2	0.1	0.1	0.1	0.1	0.1	0.1	0.1
Layer	I	I	I	I	I	I	I	I	I	I
Min (ctrl)	12.35	18.6333	21.0166	23.7244	15.9246	22.7494	20.7995	26.3243	23.3994	19.1745
Max (ctrl)	12.7833	19.0666	21.4499	24.3744	16.5746	24.0494	22.0994	27.2993	24.3744	19.8245
Mean (ctrl)	12.5946	18.808	21.2892	24.0599	16.3125	23.0744	21.3736	26.88	24.0704	19.4471
sd (ctrl)	0.165405	0.15238	0.111434	0.102217	0.212605	0.283064	0.27896	0.280744	0.250834	0.147666
1.960*sd	0.324194	0.298665	0.21841	0.200346	0.416705	0.554806	0.546762	0.550259	0.491634	0.289426
2.576*sd	0.426083	0.392531	0.287053	0.263312	0.547669	0.729173	0.718601	0.723197	0.646148	0.380389
t0 (Opto) (sec.)	31	31	31	31	32	33	33	31	32	33
CV	0.013133	0.00810187	0.00523429	0.00424846	0.0130332	0.0122674	0.0130516	0.0104444	0.0104209	0.00759324
Neurovascular response	Vc	Vc	Vc	Vc	Vc-Vd		Vc	Vc-Vd	Vc	Vc-Vd
Onset contraction (3 points) (sec.)
Max-contraction (3 points)
Magnitude contraction (3points)
duration contraction (3 points)
Onset dilation (3 points) (sec.)
Max-dilation (3 points)
Magnitude dilation (3points)
Max-dilatation
Max-contraction
t Max-contraction
DContraction
Contraction K+
Sexe
Age

## Sheet: Indo
Stimulation
Time	BGBV-132_0000	BGBV-138_0000	BGBV-278_0001	BGBV-279_0001	BGBV-281_0001	BGBV-282_0001	BGBV-284_0001	BGBV-415_0001	BGBV-416_0001	BGBV-418_0001
0	15.9246	19.4995	11.3747	11.0497	15.9246	10.3997	20.4745	20.1495	25.6744	23.3994
1	15.5996	19.4995	11.3747	10.7247	15.5996	10.0747	20.4745	20.1495	25.9994	23.0744
2	15.5996	19.1745	11.3747	11.0497	15.5996	10.3997	20.7995	20.1495	25.3494	22.7494
3	15.5996	19.4995	11.3747	10.3997	15.5996	10.3997	20.4745	20.1495	25.6744	23.0744
4	15.5996	19.1745	11.3747	10.7247	15.5996	10.3997	20.1495	20.1495	25.6744	22.7494
5	15.5996	19.4995	11.3747	10.7247	15.5996	10.3997	20.4745	20.1495	25.6744	23.0744
6	15.5996	19.1745	11.3747	10.7247	15.9246	10.3997	20.4745	20.1495	25.6744	23.0744
7	15.9246	19.4995	11.3747	10.7247	15.5996	10.0747	20.4745	20.1495	25.0244	23.0744
8	15.5996	19.4995	11.3747	11.0497	15.5996	10.0747	20.4745	20.1495	25.3494	22.4244
9	15.5996	19.4995	11.3747	10.7247	15.5996	10.3997	20.4745	20.1495	25.9994	23.3994
10	15.9246	19.4995	11.3747	10.3997	15.9246	10.3997	20.4745	20.1495	25.3494	23.0744
11	15.5996	19.4995	11.3747	10.7247	15.9246	10.3997	20.4745	20.1495	25.6744	23.3994
12	15.5996	19.1745	11.3747	11.0497	15.5996	10.3997	20.4745	20.1495	25.3494	22.7494
13	15.5996	19.4995	11.3747	11.0497	15.9246	10.3997	20.4745	20.1495	25.6744	23.0744
14	15.5996	19.4995	11.3747	11.0497	15.2746	10.0747	20.4745	20.1495	25.6744	23.3994
15	15.5996	19.1745	10.7247	11.0497	15.9246	10.3997	20.4745	20.1495	25.6744	23.0744
16	15.5996	19.4995	11.0497	11.3747	15.5996	10.7247	20.7995	20.1495	25.3494	23.0744
17	15.5996	19.4995	11.0497	10.3997	15.9246	10.0747	20.4745	20.1495	25.6744	23.3994
18	15.5996	19.1745	11.3747	10.7247	15.5996	10.3997	20.4745	20.1495	25.9994	23.3994
19	15.5996	19.4995	11.0497	11.0497	16.2496	10.3997	20.4745	20.1495	25.3494	23.3994
20	15.5996	19.4995	11.3747	11.0497	15.2746	10.0747	20.4745	20.1495	25.6744	23.0744
21	15.5996	19.4995	11.3747	11.3747	15.5996	10.3997	20.7995	20.1495	25.6744	22.7494
22	15.5996	19.4995	11.3747	11.3747	15.9246	10.3997	20.4745	20.1495	25.6744	23.3994
23	15.9246	19.4995	11.0497	11.0497	15.9246	10.3997	20.4745	20.1495	25.6744	22.4244
24	15.9246	19.4995	11.0497	11.0497	15.2746	10.3997	20.4745	20.1495	25.9994	23.0744
25	15.5996	19.4995	11.0497	11.0497	15.5996	10.3997	20.1495	20.1495	25.6744	23.0744
26	15.5996	19.4995	11.3747	11.0497	15.5996	10.3997	20.4745	20.1495	25.3494	23.3994
27	15.5996	19.4995	11.3747	11.0497	15.9246	10.3997	20.4745	20.1495	25.6744	23.3994
28	15.5996	19.4995	11.3747	11.0497	15.9246	10.7247	20.7995	20.1495	25.6744	22.7494
29	15.5996	19.4995	11.3747	11.3747	15.5996	10.3997	20.4745	20.1495	25.3494	23.0744
30	15.5996	19.4995	11.0497	11.6997	15.5996	10.0747	20.4745	20.1495	25.3494	22.7494
31	15.5996	19.4995	11.3747	11.0497	15.5996	10.3997	20.1495	19.8245	25.9994	23.0744
32	15.5996	19.4995	11.0497	11.0497	15.9246	10.3997	20.4745	20.1495	25.3494	23.3994
33	15.5996	19.4995	11.0497	11.3747	15.9246	10.3997	20.4745	20.1495	25.6744	23.3994
34	15.5996	19.1745	11.0497	10.7247	15.5996	10.3997	20.4745	20.4745	25.6744	23.0744
35	15.5996	19.4995	11.3747	10.7247	15.9246	10.3997	20.1495	20.4745	25.6744	22.7494
36	15.5996	19.4995	11.3747	11.0497	15.9246	10.3997	20.7995	20.4745	25.3494	23.0744
37	15.5996	19.4995	11.3747	11.0497	15.9246	10.3997	20.4745	20.1495	25.0244	23.3994
38	15.5996	19.4995	11.0497	11.3747	15.2746	10.3997	20.7995	20.4745	25.3494	23.0744
39	15.5996	19.4995	11.0497	11.0497	15.2746	10.3997	20.4745	20.1495	25.9994	23.0744
40	15.5996	19.4995	11.0497	11.0497	15.9246	10.3997	20.7995	19.8245	25.0244	23.3994
41	15.5996	19.4995	11.0497	11.0497	15.9246	10.3997	20.7995	20.1495	25.0244	23.0744
42	15.5996	19.4995	11.6997	11.0497	15.9246	10.3997	20.7995	20.1495	25.3494	23.0744
43	15.5996	19.4995	11.3747	11.3747	15.5996	10.3997	20.7995	19.8245	25.3494	23.7244
44	15.5996	19.4995	11.3747	11.3747	15.5996	10.3997	20.7995	20.1495	25.6744	22.7494
45	15.5996	19.1745	11.0497	11.3747	15.9246	10.3997	20.4745	19.8245	25.6744	22.7494
46	15.5996	19.4995	11.3747	11.0497	15.5996	10.0747	20.4745	20.1495	25.3494	23.3994
47	15.5996	19.4995	11.3747	11.0497	15.2746	10.3997	20.4745	20.1495	25.3494	23.7244
48	15.5996	19.4995	11.0497	11.0497	15.9246	10.3997	20.4745	20.1495	25.3494	23.0744
49	15.5996	19.4995	11.0497	11.0497	15.9246	10.0747	20.4745	20.1495	25.3494	23.3994
50	15.5996	19.4995	11.0497	11.0497	15.9246	10.3997	20.4745	20.4745	25.9994	22.4244
51	15.5996	19.4995	11.3747	11.0497	15.5996	10.3997	20.4745	20.1495	24.6994	22.7494
52	15.5996	19.4995	11.0497	11.0497	15.9246	10.3997	20.4745	20.4745	25.6744	23.7244
53	15.5996	19.4995	11.3747	11.0497	16.2496	10.3997	20.1495	20.4745	25.3494	22.7494
54	15.5996	19.4995	11.3747	11.0497	15.9246	10.0747	20.4745	20.4745	25.9994	23.0744
55	15.5996	19.4995	11.3747	11.3747	15.9246	10.0747	20.4745	20.1495	25.6744	24.0494
56	15.5996	19.4995	11.0497	11.0497	15.5996	10.0747	20.4745	20.1495	25.6744	23.3994
57	15.5996	19.4995	11.0497	11.3747	15.5996	10.0747	20.4745	20.1495	25.6744	22.7494
58	15.2746	19.4995	11.0497	11.3747	15.9246	10.7247	20.4745	20.4745	25.3494	23.3994
59	15.5996	19.4995	11.0497	11.3747	15.5996	10.3997	20.7995	20.1495	25.6744	23.0744
60	15.2746	19.4995	11.0497	11.3747	15.2746	10.3997	20.4745	20.4745	25.3494	23.3994
61	15.5996	19.4995	11.0497	11.0497	15.9246	10.3997	20.4745	20.4745	25.3494	23.3994
62	15.5996	19.4995	11.3747	11.3747	15.5996	10.3997	20.4745	20.1495	25.6744	23.3994
63	15.5996	19.1745	11.0497	11.3747	15.9246	10.3997	20.4745	20.1495	25.9994	23.0744
64	15.9246	19.4995	10.7247	11.3747	16.2496	10.3997	20.4745	20.1495	25.9994	23.0744
65	15.9246	19.1745	11.0497	11.3747	15.9246	10.3997	20.1495	20.1495	25.3494	23.7244
66	15.5996	19.4995	11.0497	11.3747	15.9246	10.3997	20.1495	20.1495	25.6744	23.7244
67	15.9246	19.4995	11.0497	11.3747	15.5996	10.3997	20.4745	20.4745	25.3494	23.7244
68	15.9246	19.4995	11.0497	11.3747	15.9246	10.3997	20.1495	20.4745	25.0244	23.0744
69	15.9246	19.4995	11.0497	11.3747	16.2496	10.3997	20.4745	20.4745	25.9994	23.0744
70	15.9246	19.4995	11.0497	11.0497	16.2496	10.7247	20.7995	20.1495	25.3494	23.0744
71	15.9246	19.8245	11.6997	11.0497	15.5996	10.7247	20.4745	20.4745	25.6744	23.3994
72	15.9246	19.1745	11.0497	11.3747	16.5746	10.7247	20.4745	20.1495	25.3494	23.7244
73	15.9246	19.1745	11.0497	11.0497	15.9246	10.7247	20.4745	20.4745	25.6744	23.3994
74	15.9246	19.4995	11.0497	11.3747	16.2496	10.7247	20.4745	20.1495	25.9994	23.7244
75	15.9246	19.4995	10.7247	11.3747	15.5996	10.7247	20.4745	20.4745	25.3494	23.3994
76	15.5996	19.4995	11.0497	11.6997	15.5996	10.7247	20.4745	20.1495	25.6744	23.3994
77	15.9246	19.4995	11.0497	11.6997	15.9246	10.3997	20.4745	20.1495	25.6744	23.3994
78	15.9246	19.4995	11.3747	11.6997	16.5746	10.7247	20.4745	20.1495	25.0244	23.7244
79	15.9246	19.4995	11.0497	11.3747	15.9246	10.7247	20.4745	20.1495	25.3494	23.0744
80	15.9246	19.4995	11.0497	11.6997	15.5996	10.7247	20.4745	20.1495	25.3494	23.3994
81	15.9246	19.1745	11.0497	11.6997	15.9246	10.7247	20.4745	20.4745	25.3494	23.0744
82	15.9246	19.4995	11.0497	11.3747	15.9246	10.7247	20.7995	20.1495	25.6744	23.3994
83	15.9246	19.4995	11.0497	11.3747	15.9246	10.3997	20.4745	20.1495	25.0244	22.7494
84	15.9246	19.4995	11.0497	11.3747	15.9246	10.7247	20.4745	20.4745	24.6994	23.0744
85	15.9246	19.4995	10.7247	11.6997	15.9246	10.7247	20.4745	20.1495	25.6744	23.3994
86	15.9246	19.4995	11.0497	11.3747	15.9246	10.3997	20.4745	20.4745	25.3494	23.3994
87	15.9246	19.4995	11.0497	11.6997	15.9246	10.7247	20.1495	20.4745	25.9994	23.7244
88	15.9246	19.4995	11.0497	11.3747	15.5996	10.7247	20.1495	20.4745	25.3494	23.7244
89	15.9246	19.4995	10.7247	11.3747	16.2496	10.3997	20.1495	20.1495	25.6744	23.0744
90	15.9246	19.4995	11.0497	11.3747	15.9246	10.3997	20.1495	20.4745	25.3494	22.7494
91	15.9246	19.4995	11.0497	11.6997	15.5996	10.7247	20.1495	20.1495	24.6994	23.0744
92	15.9246	19.4995	11.0497	10.7247	15.9246	10.3997	20.4745	20.1495	25.9994	22.4244
93	15.9246	19.4995	11.0497	10.3997	15.9246	10.3997	20.1495	20.4745	25.6744	23.7244
94	15.9246	19.4995	10.7247	10.3997	15.9246	10.3997	20.1495	20.1495	25.3494	23.0744
95	15.9246	19.4995	11.3747	10.7247	15.5996	10.3997	20.1495	20.1495	25.3494	23.3994
96	15.9246	19.4995	11.0497	10.3997	15.9246	10.3997	20.7995	20.1495	25.3494	23.0744
97	15.9246	19.4995	10.7247	11.0497	15.5996	10.3997	20.4745	20.4745	25.6744	23.3994
98	15.9246	19.4995	11.3747	10.7247	15.5996	10.3997	20.4745	20.4745	25.3494	23.0744
99	15.9246	19.4995	11.0497	11.0497	15.5996	10.0747	20.4745	20.1495	25.3494	21.7745
100	15.9246	19.4995	11.0497	10.7247	15.5996	10.3997	20.1495	20.1495	25.0244	23.0744
101	15.9246	19.4995	11.0497	11.0497	15.9246	10.3997	20.7995	20.4745	25.0244	22.7494
102	15.9246	19.4995	11.0497	10.7247	16.2496	10.3997	20.1495	20.1495	25.6744	23.3994
103	15.9246	19.4995	11.0497	11.0497	15.5996	10.3997	20.4745	20.1495	25.3494	23.0744
104	15.9246	19.4995	11.0497	11.0497	16.5746	10.7247	20.4745	20.1495	26.3243	22.7494
105	15.5996	19.4995	11.0497	10.7247	16.2496	10.3997	20.4745	20.1495	25.6744	23.3994
106	15.5996	19.4995	11.3747	10.7247	15.9246	10.3997	20.7995	20.1495	25.0244	23.0744
107	15.5996	19.8245	11.0497	10.7247	15.9246	10.3997	20.7995	20.4745	25.3494	22.7494
108	15.2746	19.4995	11.0497	10.3997	16.5746	10.3997	20.4745	20.1495	25.6744	23.0744
109	15.5996	19.4995	11.0497	10.3997	15.9246	10.3997	20.4745	20.4745	25.6744	23.0744
110	15.2746	19.4995	11.0497	10.7247	15.9246	10.3997	20.4745	20.1495	25.0244	23.3994
111	15.5996	19.4995	11.0497	10.3997	15.9246	10.3997	20.4745	20.1495	25.3494	22.4244
112	15.5996	19.4995	11.0497	10.3997	16.2496	10.3997	20.4745	20.1495	25.3494	23.3994
113	15.5996	19.4995	11.0497	10.7247	16.2496	10.3997	20.4745	20.4745	25.6744	23.3994
114	15.9246	19.4995	11.0497	10.7247	15.2746	10.3997	20.1495	20.1495	25.3494	22.4244
115	15.2746	19.4995	11.0497	10.3997	15.5996	10.3997	20.1495	20.1495	25.3494	23.3994
116	15.9246	19.8245	11.0497	10.7247	15.9246	10.3997	20.1495	20.1495	25.9994	22.7494
117	15.5996	19.4995	11.0497	10.7247	15.5996	10.3997	20.4745	20.1495	25.9994	23.0744
118	15.5996	19.4995	11.0497	10.7247	15.9246	10.3997	20.4745	20.1495	25.0244	22.7494
119	15.9246	19.4995	11.0497	11.0497	15.9246	10.3997	20.7995	20.1495	25.3494	22.7494
120	15.2746	19.4995	11.0497	11.0497	15.9246	10.3997	20.4745	20.1495	25.3494	23.3994
121	15.5996	19.4995	11.3747	11.3747	15.9246	10.3997	20.4745	20.1495	25.6744	23.0744
122	15.9246	19.4995	11.0497	11.6997	15.9246	10.3997	20.4745	20.1495	25.3494	22.7494
123	15.2746	19.4995	11.0497	11.0497	15.9246	10.3997	20.4745	20.1495	25.9994	22.7494
124	15.5996	19.4995	11.0497	11.3747	15.5996	10.3997	20.4745	20.4745	25.3494	23.3994
125	15.5996	19.4995	11.0497	11.0497	16.2496	10.3997	20.4745	20.4745	25.0244	23.0744
126	15.5996	19.8245	11.3747	11.0497	15.2746	10.3997	20.4745	20.4745	25.3494	22.7494
127	15.2746	19.4995	11.0497	11.3747	15.5996	10.7247	20.1495	20.1495	25.3494	22.0994
128	15.2746	19.4995	11.0497	11.3747	16.2496	10.3997	20.7995	20.1495	25.3494	23.3994
129	15.2746	19.4995	11.0497	11.6997	15.9246	10.3997	20.1495	20.1495	25.0244	23.0744
130	15.5996	19.4995	11.0497	11.6997	15.9246	10.3997	20.4745	20.1495	25.3494	22.4244
131	15.2746	19.4995	11.0497	11.3747	15.9246	10.3997	20.1495	20.4745	25.3494	23.0744
132	15.5996	19.4995	11.0497	11.0497	15.9246	10.3997	20.1495	20.4745	25.0244	23.0744
133	15.2746	19.4995	11.0497	11.3747	15.5996	10.3997	20.4745	20.1495	25.3494	22.7494
134	15.5996	19.4995	11.0497	11.6997	15.9246	10.3997	20.7995	20.1495	25.3494	22.7494
135	15.2746	19.4995	11.3747	11.3747	15.2746	10.3997	20.1495	20.4745	25.6744	23.0744
136	15.2746	19.4995	11.3747	11.6997	15.9246	10.3997	20.1495	20.1495	25.0244	23.0744
137	15.2746	19.4995	11.0497	11.3747	15.2746	10.3997	20.1495	20.1495	26.3243	23.7244
138	15.5996	19.4995	11.0497	11.3747	15.5996	10.3997	20.1495	20.1495	25.3494	23.3994
139	15.2746	19.4995	11.3747	11.6997	15.2746	10.3997	19.8245	20.1495	25.0244	22.7494
140	15.5996	19.4995	10.7247	11.3747	15.5996	10.3997	20.1495	20.1495	25.9994	23.3994
141	15.2746	19.4995	11.0497	11.3747	15.5996	10.3997	20.1495	20.1495	25.0244	23.0744
142	15.9246	19.4995	11.3747	11.3747	16.2496	10.3997	20.4745	20.1495	25.6744	23.3994
143	15.2746	19.4995	11.0497	11.6997	15.5996	10.3997	20.4745	20.1495	25.3494	23.0744
144	15.2746	19.4995	11.3747	11.6997	15.5996	10.3997	20.1495	20.1495	26.3243	23.0744
145	15.2746	19.4995	11.0497	11.6997	16.5746	10.3997	20.1495	20.1495	25.0244	23.0744
146	15.2746	19.4995	11.3747	11.3747	16.2496	10.3997	19.8245	20.1495	25.0244	23.3994
147	15.2746	19.4995	11.3747	11.3747	15.9246	10.3997	19.8245	20.1495	25.3494	22.7494
148	15.2746	19.4995	11.3747	11.6997	15.5996	10.3997	19.8245	20.1495	25.0244	22.0994
149	15.2746	19.4995	11.3747	11.6997	15.5996	10.3997	19.8245	20.1495	25.0244	23.0744
150	15.2746	19.4995	11.0497	12.0247	15.5996	10.3997	20.1495	20.1495	25.6744	23.0744
151	15.2746	19.4995	11.3747	11.6997	15.5996	10.3997	20.1495	20.1495	25.6744	22.7494
152	15.2746	19.4995	11.0497	11.6997	15.5996	10.3997	20.1495	20.1495	25.0244	23.3994
153	15.2746	19.4995	11.3747	11.3747	15.5996	10.3997	19.8245	20.1495	25.0244	23.3994
154	15.2746	19.4995	11.3747	11.3747	15.5996	10.3997	19.8245	20.1495	25.3494	23.0744
155	15.2746	19.4995	11.0497	11.6997	15.5996	10.3997	20.1495	20.1495	25.3494	23.0744
156	15.2746	19.8245	11.0497	11.6997	15.9246	10.3997	20.1495	20.1495	25.3494	22.7494
157	15.2746	19.4995	11.3747	11.0497	15.9246	10.3997	20.4745	20.1495	25.3494	23.0744
158	15.2746	19.4995	11.6997	11.6997	15.5996	10.3997	20.4745	20.1495	25.0244	23.3994
159	15.2746	19.4995	11.0497	11.6997	15.5996	10.3997	20.4745	20.1495	25.0244	22.7494
160	15.2746	19.8245	11.0497	11.3747	15.5996	10.3997	20.4745	20.1495	25.6744	23.3994
161	15.2746	19.1745	11.0497	11.3747	15.9246	10.3997	20.4745	20.1495	25.0244	23.3994
162	15.2746	19.4995	10.7247	11.6997	15.5996	10.3997	20.4745	20.1495	25.0244	23.0744
163	15.2746	19.1745	11.0497	11.3747	15.2746	10.3997	20.7995	20.1495	25.3494	23.0744
164	15.2746	19.4995	11.6997	11.0497	16.5746	10.3997	20.1495	20.1495	25.0244	23.0744
165	15.5996	19.4995	11.0497	11.6997	15.9246	10.3997	20.4745	20.1495	25.3494	23.7244
166	15.2746	19.4995	11.0497	11.3747	16.2496	10.3997	20.7995	20.1495	25.0244	23.3994
167	15.2746	19.4995	11.6997	11.6997	15.2746	10.3997	20.1495	20.1495	25.3494	23.0744
168	15.5996	19.4995	11.0497	11.6997	15.5996	10.3997	20.4745	20.1495	25.3494	23.3994
169	15.9246	19.4995	11.0497	11.6997	15.9246	10.3997	20.7995	20.1495	24.6994	22.4244
170	15.9246	19.4995	11.3747	11.3747	15.9246	10.3997	20.7995	20.1495	25.3494	23.0744
171	15.5996	19.4995	11.0497	11.6997	15.5996	10.3997	20.1495	20.1495	25.3494	23.0744
172	15.5996	19.4995	11.3747	11.3747	15.5996	10.3997	20.4745	20.1495	25.0244	23.0744
173	15.9246	19.4995	11.3747	11.3747	15.9246	10.3997	20.4745	20.1495	25.6744	23.3994
174	15.2746	19.1745	11.0497	11.3747	15.9246	10.3997	20.1495	20.1495	26.3243	23.7244
175	15.2746	19.4995	11.0497	11.3747	15.5996	10.3997	19.8245	20.1495	25.0244	23.0744
176	15.5996	19.4995	11.3747	11.3747	15.2746	10.3997	20.7995	20.1495	25.9994	23.0744
177	15.5996	19.4995	11.0497	11.6997	15.5996	10.3997	20.1495	20.1495	26.3243	23.0744
178	15.5996	19.4995	11.3747	11.3747	15.5996	10.3997	20.4745	20.1495	25.0244	23.0744
179	15.5996	19.8245	11.0497	11.6997	15.5996	10.3997	20.7995	20.1495	25.0244	23.3994
180	15.5996	19.4995	11.0497	11.6997	15.5996	10.3997	20.1495	20.1495	25.0244	22.7494
181	15.5996	19.4995	11.3747	11.3747	15.9246	10.3997	20.1495	20.1495	24.6994	23.0744
182	15.2746	19.4995	11.3747	11.3747	15.9246	10.3997	20.1495	20.1495	25.3494	22.7494
183	15.5996	19.4995	11.3747	11.3747	15.2746	10.3997	20.1495	20.1495	25.0244	23.0744
184	15.5996	19.4995	11.3747	11.3747	16.2496	10.3997	20.4745	20.1495	25.0244	22.4244
185	15.2746	19.4995	11.6997	11.6997	15.5996	10.0747	20.1495	20.1495	25.0244	22.7494
186	15.2746	19.1745	11.0497	11.3747	15.5996	10.3997	20.1495	20.1495	24.6994	23.3994
187	15.2746	19.4995	11.3747	11.3747	16.2496	10.3997	20.1495	20.1495	25.0244	23.3994
188	15.5996	19.4995	11.0497	11.3747	15.9246	10.3997	20.4745	20.1495	25.0244	23.0744
189	15.5996	19.4995	11.0497	11.6997	15.9246	10.3997	20.1495	20.1495	24.6994	22.7494
190	15.5996	19.4995	11.0497	11.3747	15.5996	10.3997	20.1495	20.1495	25.3494	23.0744
191	15.5996	19.1745	11.3747	11.3747	16.2496	10.3997	20.1495	20.1495	25.6744	23.0744
192	15.5996	19.4995	11.3747	11.3747	15.9246	10.3997	20.1495	20.1495	24.6994	23.0744
193	15.5996	19.4995	11.0497	11.0497	15.2746	10.3997	20.1495	20.4745	25.3494	23.3994
194	15.2746	19.4995	11.3747	11.3747	15.9246	10.3997	20.1495	20.1495	25.0244	22.7494
195	15.5996	19.4995	11.0497	11.6997	15.5996	10.3997	20.1495	20.1495	25.6744	23.0744
196	15.5996	19.4995	11.0497	11.6997	15.9246	10.3997	20.1495	20.1495	25.3494	22.7494
197	15.5996	19.4995	11.0497	11.6997	15.5996	10.3997	20.4745	20.1495	25.0244	22.7494
198	15.5996	19.4995	11.0497	11.3747	15.2746	10.3997	20.1495	20.1495	25.0244	23.0744
199	15.5996	19.4995	11.0497	11.3747	15.2746	10.3997	20.1495	20.1495	25.9994	22.4244
200	15.5996	19.4995	11.0497	11.3747	14.9496	10.7247	20.1495	20.1495	25.6744	22.0994
201	15.5996	19.4995	11.0497	12.0247	15.5996	10.3997	20.4745	20.4745	25.3494	23.3994
202	15.5996	19.4995	11.0497	11.0497	14.9496	10.3997	20.1495	20.1495	25.0244	23.3994
203	15.5996	19.4995	11.0497	12.0247	15.2746	10.3997	20.1495	20.1495	25.0244	23.3994
204	15.5996	19.4995	11.3747	11.3747	15.2746	10.7247	20.1495	20.4745	25.0244	22.7494
205	15.5996	19.4995	11.0497	11.3747	15.2746	10.3997	20.1495	20.4745	25.6744	22.7494
206	15.5996	19.4995	11.0497	11.6997	15.2746	10.3997	20.4745	20.1495	25.6744	22.7494
207	15.5996	19.4995	11.3747	11.6997	14.9496	10.3997	20.4745	20.1495	25.9994	23.0744
208	15.5996	19.4995	11.0497	11.6997	15.9246	10.3997	20.1495	20.1495	25.3494	23.0744
209	15.5996	19.4995	11.0497	11.3747	15.9246	10.3997	20.4745	20.1495	25.6744	22.7494
210	15.5996	19.4995	11.0497	11.6997	15.5996	10.7247	20.4745	20.1495	25.0244	23.3994
211	15.5996	19.4995	11.3747	11.6997	16.2496	10.3997	20.1495	20.4745	24.6994	22.4244
212	15.5996	19.4995	11.3747	11.6997	15.2746	10.3997	20.4745	20.4745	25.3494	22.0994
213	15.5996	19.4995	11.3747	11.6997	15.5996	10.3997	20.1495	20.4745	25.0244	23.0744
214	15.5996	19.4995	11.3747	11.3747	15.5996	10.7247	20.4745	20.4745	25.3494	22.7494
215	15.5996	19.4995	11.0497	11.6997	15.5996	10.3997	20.7995	20.7995	25.3494	22.7494
216	15.5996	19.1745	11.0497	11.6997	15.5996	10.3997	20.4745	20.1495	25.3494	23.0744
217	15.5996	19.8245	11.0497	11.3747	15.9246	10.3997	20.1495	20.1495	25.6744	23.0744
218	15.5996	19.4995	11.3747	11.6997	15.5996	10.3997	20.7995	20.1495	24.6994	23.0744
219	15.5996	19.4995	11.6997	11.3747	15.9246	10.3997	20.7995	20.4745	25.3494	22.4244
220	15.5996	19.4995	11.3747	11.3747	15.2746	10.3997	20.4745	20.7995	25.3494	22.0994
221	15.5996	19.1745	11.0497	11.3747	15.5996	10.3997	20.7995	20.1495	25.0244	23.3994
222	15.5996	19.4995	11.0497	11.6997	15.5996	10.3997	20.1495	20.4745	25.6744	23.3994
223	15.5996	19.1745	11.0497	11.3747	15.9246	10.3997	20.7995	20.4745	25.0244	23.3994
224	15.5996	19.4995	11.0497	11.3747	15.9246	10.3997	20.4745	20.4745	25.3494	23.0744
225	15.5996	19.4995	11.0497	11.6997	15.9246	10.3997	21.1245	20.4745	25.3494	23.3994
226	15.5996	19.4995	11.3747	11.3747	14.9496	10.3997	20.7995	20.4745	24.3744	23.0744
227	15.5996	19.4995	11.3747	11.6997	15.9246	10.3997	21.1245	20.4745	25.3494	23.0744
228	15.5996	19.4995	11.3747	11.3747	15.5996	10.3997	21.1245	20.1495	25.0244	23.3994
229	15.5996	19.4995	11.0497	11.6997	15.2746	10.3997	21.1245	20.4745	25.6744	22.7494
230	15.5996	19.1745	11.3747	11.6997	15.5996	10.3997	21.1245	20.4745	25.0244	23.7244
231	15.5996	19.4995	11.3747	11.0497	15.5996	10.3997	21.1245	20.4745	25.3494	23.0744
232	15.5996	19.1745	11.3747	11.6997	15.5996	10.3997	21.1245	20.4745	25.3494	23.7244
233	15.5996	19.1745	11.0497	11.6997	15.9246	10.3997	21.4495	20.4745	25.0244	23.0744
234	15.5996	19.4995	11.0497	11.3747	15.2746	10.3997	21.4495	20.4745	25.0244	23.0744
235	15.5996	19.1745	11.3747	11.6997	16.2496	10.3997	20.7995	20.4745	25.0244	23.3994
236	15.5996	19.4995	11.3747	11.6997	16.2496	10.3997	21.1245	20.4745	25.0244	23.0744
237	15.5996	19.1745	11.3747	11.3747	15.2746	10.3997	20.7995	20.4745	24.6994	23.3994
238	15.5996	19.4995	11.0497	11.3747	15.9246	10.3997	21.1245	20.4745	25.3494	22.7494
239	15.5996	19.4995	11.3747	11.3747	15.5996	10.3997	21.1245	20.4745	25.0244	22.4244
240	15.5996	19.1745	11.3747	11.6997	15.5996	10.3997	20.7995	20.4745	25.3494	22.4244
241	15.5996	19.1745	11.3747	11.3747	15.5996	10.3997	20.7995	20.4745	25.3494	22.7494
242	15.5996	19.1745	11.3747	11.6997	15.5996	10.3997	20.7995	20.4745	24.6994	23.0744
243	15.9246	19.1745	11.3747	11.3747	15.5996	10.3997	20.4745	20.4745	24.6994	23.3994
244	15.5996	19.4995	11.0497	11.6997	15.5996	10.3997	20.7995	20.4745	24.6994	23.0744
245	15.5996	19.1745	11.3747	11.6997	16.2496	10.3997	20.4745	20.4745	25.0244	23.0744
246	15.5996	19.4995	11.3747	11.3747	15.5996	10.0747	20.4745	20.4745	25.0244	22.7494
247	15.5996	19.4995	11.0497	11.3747	15.9246	10.3997	20.7995	20.4745	25.0244	22.7494
248	15.5996	19.1745	11.3747	11.3747	15.9246	10.3997	20.4745	20.4745	24.6994	22.7494
249	15.5996	19.1745	11.0497	11.3747	15.5996	10.3997	21.1245	20.1495	25.0244	22.7494
250	15.5996	19.1745	11.3747	11.3747	15.5996	10.3997	20.4745	20.4745	25.3494	23.0744
251	15.5996	19.1745	11.0497	11.3747	15.5996	10.3997	20.4745	20.4745	24.6994	23.0744
252	15.5996	19.4995	11.3747	11.6997	16.2496	10.3997	20.4745	20.4745	25.0244	23.3994
253	15.5996	18.8495	11.3747	11.0497	15.9246	10.3997	20.4745	20.4745	24.6994	23.0744
254	15.2746	18.8495	11.3747	11.6997	15.5996	10.3997	20.7995	20.4745	25.0244	22.7494
255	15.2746	19.4995	11.0497	11.3747	15.5996	10.3997	20.4745	20.4745	24.6994	23.3994
256	15.2746	19.1745	11.3747	11.0497	16.2496	10.3997	20.1495	20.4745	25.0244	22.0994
257	15.2746	18.8495	11.3747	11.0497	15.2746	10.3997	20.4745	20.4745	24.6994	22.4244
258	15.2746	19.4995	11.3747	11.0497	16.2496	10.3997	20.4745	20.4745	24.6994	22.7494
259	15.2746	19.1745	11.3747	12.0247	16.2496	10.3997	20.4745	20.1495	24.6994	23.0744
260	15.2746	19.4995	11.3747	11.0497	15.9246	10.3997	20.1495	20.4745	25.0244	22.4244
261	15.2746	19.1745	11.3747	11.3747	15.5996	10.3997	20.7995	20.4745	24.6994	22.7494
262	15.2746	19.1745	11.0497	11.0497	15.2746	10.3997	20.4745	20.4745	25.0244	22.7494
263	15.2746	19.4995	11.0497	11.3747	15.5996	10.3997	20.1495	20.4745	24.6994	23.3994
264	15.2746	19.1745	11.3747	11.0497	15.9246	10.3997	20.4745	20.4745	25.3494	23.0744
265	15.2746	19.1745	11.0497	11.3747	15.9246	10.3997	20.7995	20.4745	24.6994	23.0744
266	15.2746	19.4995	11.3747	11.3747	15.5996	10.3997	20.7995	20.4745	25.3494	22.4244
267	15.2746	19.1745	11.3747	11.0497	15.9246	10.3997	20.7995	20.4745	24.6994	22.4244
268	15.2746	19.4995	11.0497	11.0497	15.9246	10.3997	20.1495	20.4745	25.0244	22.7494
269	15.2746	19.4995	11.0497	11.3747	15.2746	10.3997	20.1495	20.4745	24.6994	23.0744
270	15.2746	19.1745	11.3747	11.3747	15.2746	10.3997	20.4745	20.4745	25.0244	23.0744
271	15.2746	19.1745	11.0497	11.3747	16.2496	10.3997	20.4745	20.1495	25.3494	22.4244
272	15.2746	19.4995	11.3747	11.3747	15.5996	10.0747	20.1495	20.1495	25.0244	22.0994
273	15.2746	18.8495	11.3747	11.3747	15.9246	10.3997	20.1495	20.1495	24.6994	22.0994
274	15.2746	19.4995	11.0497	11.3747	15.2746	10.3997	20.1495	19.8245	24.6994	23.0744
275	15.2746	19.4995	11.3747	11.3747	16.2496	10.3997	20.4745	20.4745	25.0244	22.7494
276	15.2746	19.1745	11.3747	11.3747	15.2746	10.3997	20.7995	20.4745	25.6744	22.4244
277	15.2746	19.1745	11.3747	11.0497	15.9246	10.3997	20.4745	20.1495	24.6994	23.0744
278	15.2746	19.1745	11.0497	11.3747	15.9246	10.3997	20.7995	20.1495	25.0244	22.4244
279	15.2746	19.1745	11.3747	11.0497	15.9246	10.3997	20.1495	20.4745	25.0244	22.0994
280	15.2746	19.4995	11.3747	11.3747	16.2496	10.3997	20.7995	20.1495	25.0244	22.4244
281	15.2746	19.4995	11.3747	11.0497	15.9246	10.3997	20.7995	20.4745	25.0244	22.7494
282	15.2746	19.4995	11.0497	11.3747	16.2496	10.3997	20.4745	20.4745	25.0244	22.7494
283	15.2746	18.8495	11.3747	11.3747	15.5996	10.3997	20.7995	20.4745	24.6994	23.0744
284	15.2746	19.1745	11.0497	11.3747	16.2496	10.3997	20.4745	20.4745	24.6994	22.4244
285	15.5996	19.1745	11.0497	11.3747	15.9246	10.3997	20.1495	20.4745	25.0244	22.7494
286	15.2746	19.1745	11.0497	11.3747	15.9246	10.3997	20.4745	20.4745	24.6994	22.7494
287	15.2746	19.1745	11.3747	11.0497	15.5996	10.3997	20.1495	20.4745	25.0244	22.7494
288	15.2746	19.4995	11.3747	11.0497	15.5996	10.3997	20.1495	20.4745	24.6994	23.0744
289	15.2746	19.1745	11.6997	11.0497	16.2496	10.0747	20.4745	20.4745	24.3744	23.0744
290	15.2746	19.4995	11.0497	11.0497	15.9246	10.3997	20.4745	20.4745	25.0244	22.0994
291	15.2746	19.4995	11.3747	11.0497	15.9246	10.3997	20.4745	20.4745	24.6994	22.7494
292	15.5996	19.1745	11.0497	11.0497	15.5996	10.3997	20.4745	20.4745	25.0244	22.4244
293	15.5996	19.1745	11.3747	11.3747	15.9246	10.0747	20.1495	20.4745	24.6994	22.4244
294	15.5996	19.4995	11.0497	11.0497	15.5996	10.3997	20.4745	20.4745	25.0244	23.0744
295	15.5996	19.1745	11.0497	11.3747	15.2746	10.0747	20.1495	20.4745	24.3744	22.7494
296	15.2746	19.4995	11.0497	11.3747	15.9246	10.3997	20.4745	20.4745	24.6994	23.0744
297	15.5996	19.1745	11.3747	11.3747	15.9246	10.3997	20.7995	20.4745	25.0244	22.0994
298	15.2746	19.1745	11.0497	10.7247	15.2746	10.0747	20.7995	20.4745	25.3494	22.0994
299	15.5996	19.1745	11.0497	11.0497	15.9246	10.3997	20.7995	20.4745	24.6994	22.7494
300	15.5996	19.1745	11.3747	11.3747	15.2746	10.3997	21.4495	20.4745	25.3494	21.7745
301	15.5996	19.1745	11.3747	11.0497	15.5996	10.0747	21.1245	20.4745	24.6994	22.7494
302	15.5996	19.4995	11.0497	11.0497	15.5996	10.3997	21.1245	20.4745	24.6994	23.0744
303	15.5996	19.4995	11.3747	11.0497	15.5996	10.0747	20.7995	20.4745	25.0244	22.4244
304	15.2746	19.4995	11.3747	11.0497	15.2746	10.3997	20.4745	20.4745	24.6994	22.4244
305	15.2746	19.4995	11.3747	10.7247	15.5996	10.3997	20.7995	20.4745	24.6994	22.4244
306	15.2746	19.1745	11.0497	11.0497	15.2746	10.3997	20.4745	20.4745	24.6994	22.7494
307	15.5996	19.1745	11.0497	11.3747	15.2746	10.3997	20.1495	20.4745	24.3744	22.7494
308	15.5996	19.4995	11.3747	11.0497	15.5996	10.3997	20.4745	20.4745	25.0244	22.4244
309	15.5996	19.1745	11.6997	11.3747	15.2746	10.0747	20.1495	20.4745	25.0244	23.0744
310	15.5996	19.4995	11.3747	11.0497	16.2496	10.7247	20.1495	20.4745	24.6994	22.4244
311	15.5996	19.1745	11.0497	11.3747	15.9246	10.3997	20.1495	20.4745	25.3494	22.7494
312	15.2746	19.1745	11.3747	11.3747	15.9246	10.3997	20.1495	20.4745	24.6994	22.7494
313	15.2746	19.1745	11.3747	11.3747	15.5996	10.0747	20.4745	20.4745	24.6994	22.7494
314	15.5996	19.1745	11.0497	11.0497	15.9246	10.3997	20.4745	20.4745	24.6994	23.0744
315	15.2746	19.1745	11.3747	11.0497	15.9246	10.3997	20.7995	20.4745	24.6994	22.4244
316	15.2746	19.1745	11.3747	10.7247	15.9246	10.3997	20.4745	20.4745	25.0244	22.7494
317	15.2746	19.1745	11.0497	11.0497	15.2746	10.3997	21.1245	20.4745	24.3744	22.7494
318	15.2746	19.4995	11.3747	10.7247	15.9246	10.0747	20.4745	20.4745	24.6994	22.7494
319	15.5996	19.4995	11.0497	10.7247	15.2746	10.3997	20.1495	20.4745	25.0244	23.0744
320	15.5996	19.4995	11.3747	11.0497	15.5996	10.3997	20.1495	20.4745	25.3494	23.0744
321	15.2746	19.1745	11.0497	11.0497	15.2746	10.3997	20.1495	20.4745	24.6994	23.0744
322	15.5996	19.1745	11.0497	10.7247	15.2746	10.3997	20.1495	20.4745	25.0244	22.7494
323	15.2746	18.8495	11.0497	11.0497	15.2746	10.7247	20.7995	20.4745	24.6994	22.7494
324	15.5996	19.1745	11.3747	11.3747	15.5996	10.3997	20.4745	20.4745	25.0244	22.4244
325	15.5996	18.8495	11.3747	11.0497	15.5996	10.3997	20.4745	20.4745	24.6994	22.7494
326	15.5996	19.4995	11.0497	11.3747	15.5996	10.3997	20.1495	20.4745	24.6994	22.7494
327	15.2746	19.4995	11.3747	11.0497	16.2496	10.3997	20.1495	20.4745	25.0244	22.0994
328	15.5996	19.1745	11.3747	11.0497	15.5996	10.3997	20.4745	20.4745	25.0244	23.0744
329	15.5996	19.4995	11.3747	11.0497	14.9496	10.3997	20.7995	20.4745	24.6994	22.4244
330	15.5996	19.4995	11.3747	10.7247	15.2746	10.3997	20.4745	20.4745	24.6994	22.4244
331	15.9246	19.1745	11.0497	11.0497	15.5996	10.3997	20.7995	20.4745	24.3744	23.3994
332	15.5996	19.1745	11.0497	11.3747	15.9246	10.3997	20.7995	20.4745	24.6994	22.7494
333	15.5996	19.4995	11.0497	11.3747	15.5996	10.3997	20.7995	20.4745	25.0244	22.7494
334	15.5996	19.4995	11.0497	11.3747	15.9246	10.3997	20.7995	20.4745	24.6994	23.3994
335	15.5996	19.1745	11.3747	11.0497	15.2746	10.7247	20.1495	20.4745	24.6994	22.7494
336	15.5996	19.1745	11.0497	11.6997	15.2746	10.3997	20.7995	20.1495	25.0244	23.0744
337	15.9246	19.1745	11.0497	11.6997	15.5996	10.7247	20.1495	20.4745	25.0244	22.7494
338	15.5996	19.1745	11.3747	11.3747	15.5996	10.3997	20.4745	20.4745	25.3494	22.7494
339	15.9246	19.1745	11.6997	11.3747	15.2746	10.3997	20.1495	20.1495	25.0244	22.7494
340	15.2746	19.1745	11.0497	11.3747	15.2746	10.3997	20.7995	20.4745	24.6994	22.7494
341	15.2746	19.4995	11.0497	11.3747	15.5996	10.0747	20.4745	20.4745	25.0244	22.4244
342	15.5996	19.1745	11.3747	11.0497	15.2746	10.3997	20.4745	20.4745	24.6994	23.3994
343	15.5996	19.4995	11.0497	10.7247	15.2746	10.3997	20.4745	20.4745	25.0244	22.4244
344	15.2746	19.4995	11.0497	11.3747	14.9496	10.3997	20.4745	20.4745	24.6994	22.4244
345	15.5996	19.1745	11.3747	10.7247	15.2746	10.3997	21.1245	20.4745	25.3494	22.7494
346	15.5996	19.1745	11.3747	11.3747	15.5996	10.3997	21.4495	20.4745	24.6994	22.7494
347	15.2746	19.1745	11.0497	11.0497	15.5996	10.3997	20.7995	20.4745	25.0244	22.7494
348	15.9246	19.1745	11.0497	11.0497	14.9496	10.3997	20.4745	20.4745	25.3494	23.0744
349	15.9246	19.4995	11.0497	11.3747	14.9496	10.3997	20.7995	20.4745	25.0244	23.0744
350	15.9246	19.4995	11.3747	11.0497	15.2746	10.3997	20.7995	20.4745	24.6994	22.4244
351	15.5996	19.1745	11.0497	11.0497	15.2746	10.3997	20.7995	20.1495	24.6994	23.3994
352	15.5996	19.1745	11.0497	11.3747	14.9496	10.3997	20.7995	20.4745	25.0244	22.7494
353	15.5996	19.1745	11.3747	11.3747	15.5996	10.3997	20.7995	20.4745	25.0244	23.3994
354	15.5996	19.1745	11.0497	11.3747	15.2746	10.3997	20.4745	20.1495	25.0244	22.7494
355	15.5996	19.4995	11.3747	11.3747	14.6246	10.3997	20.1495	20.4745	24.6994	22.7494
356	15.9246	19.1745	11.0497	11.3747	15.2746	10.3997	20.7995	20.4745	25.0244	22.4244
357	15.9246	19.1745	11.3747	11.0497	15.5996	10.3997	20.1495	20.4745	25.3494	23.3994
358	15.9246	19.4995	11.3747	10.7247	15.5996	10.7247	20.4745	20.4745	24.6994	23.3994
359	15.9246	19.1745	11.0497	11.6997	15.2746	10.3997	20.7995	20.4745	25.0244	22.4244
360	15.2746	19.1745	11.0497	11.3747	15.9246	10.7247	20.4745	20.4745	24.6994	22.7494
361	15.2746	18.8495	11.0497	11.3747	15.5996	10.3997	20.7995	20.4745	24.6994	23.0744
362	15.2746	19.1745	11.0497	11.0497	15.2746	10.3997	20.4745	20.4745	24.6994	23.0744
363	15.2746	18.8495	11.0497	11.0497	15.5996	10.3997	20.4745	20.4745	24.6994	22.7494
364	15.2746	19.4995	11.0497	11.3747	14.9496	10.3997	20.7995	20.4745	25.0244	23.0744
365	15.5996	19.4995	11.3747	11.3747	15.5996	10.3997	20.4745	20.4745	25.3494	23.3994
366	15.9246	19.4995	11.0497	11.0497	15.2746	10.3997	20.4745	20.4745	25.3494	22.7494
367	15.5996	19.1745	11.3747	11.0497	15.2746	10.3997	20.7995	20.4745	25.3494	22.0994
368	15.9246	19.4995	11.0497	11.3747	15.2746	10.3997	20.4745	20.4745	24.6994	23.3994
369	15.5996	19.1745	11.0497	11.0497	15.2746	10.0747	20.4745	20.4745	25.3494	22.7494
370	15.9246	19.1745	11.0497	10.7247	14.9496	10.7247	21.1245	20.4745	25.0244	23.3994
371	15.9246	19.1745	11.0497	11.3747	15.2746	10.3997	20.7995	20.4745	25.3494	23.0744
372	15.5996	19.4995	11.3747	11.0497	15.5996	10.3997	20.7995	20.4745	25.0244	23.0744
373	15.5996	19.1745	11.0497	11.0497	15.5996	10.3997	20.7995	20.4745	25.0244	23.3994
374	15.5996	19.1745	11.0497	11.0497	15.5996	10.3997	20.7995	20.4745	25.3494	22.7494
375	15.5996	19.4995	11.0497	11.0497	15.2746	10.3997	20.4745	20.4745	24.6994	22.0994
376	15.5996	19.4995	11.0497	11.0497	14.9496	10.3997	20.7995	20.4745	25.0244	22.4244
377	15.2746	19.1745	11.3747	11.0497	15.5996	10.3997	20.7995	20.4745	24.6994	23.0744
378	15.5996	19.4995	11.0497	11.0497	15.5996	10.3997	20.4745	20.4745	25.3494	23.0744
379	15.2746	19.1745	11.0497	11.0497	15.5996	10.3997	20.7995	20.4745	25.0244	23.3994
380	15.9246	19.1745	11.0497	10.7247	15.9246	10.3997	20.4745	20.1495	25.0244	22.7494
381	15.2746	19.4995	11.0497	11.0497	15.2746	10.0747	20.7995	20.4745	25.6744	23.0744
382	15.2746	19.4995	11.3747	11.0497	15.2746	10.3997	20.7995	20.4745	25.3494	23.7244
383	15.9246	19.4995	11.0497	11.0497	15.2746	10.3997	21.1245	20.1495	25.0244	23.0744
384	15.2746	19.1745	11.0497	10.7247	15.5996	10.0747	21.4495	20.4745	25.0244	23.3994
385	15.5996	19.1745	11.0497	11.0497	15.5996	10.3997	20.7995	20.4745	25.0244	22.7494
386	15.2746	19.1745	11.3747	11.0497	15.5996	10.3997	20.7995	20.4745	25.0244	22.0994
387	15.2746	19.4995	11.0497	10.7247	15.5996	10.3997	20.7995	20.1495	25.0244	22.4244
388	15.2746	19.1745	11.0497	11.0497	16.2496	10.3997	21.1245	20.4745	25.3494	22.7494
389	15.2746	19.4995	11.0497	10.7247	15.5996	10.7247	20.4745	20.4745	25.3494	22.7494
390	15.2746	19.1745	11.0497	11.0497	15.5996	10.0747	20.4745	20.4745	25.6744	23.0744
391	15.2746	18.8495	11.0497	11.0497	15.5996	10.7247	20.4745	20.4745	25.3494	23.0744
392	15.2746	19.1745	11.0497	11.0497	15.5996	10.3997	21.1245	20.4745	25.3494	22.4244
393	15.2746	19.4995	11.0497	11.0497	15.5996	10.0747	20.7995	20.1495	25.3494	23.0744
394	15.2746	19.1745	11.0497	11.0497	15.5996	10.3997	20.7995	20.4745	25.0244	22.4244
395	15.2746	19.4995	11.0497	11.0497	15.9246	10.7247	20.7995	20.1495	25.0244	22.4244
396	15.2746	19.4995	11.0497	11.0497	14.9496	10.7247	21.4495	20.4745	25.3494	23.0744
397	15.5996	19.4995	11.0497	11.0497	15.2746	10.3997	21.1245	20.4745	25.3494	22.4244
398	15.2746	19.4995	11.3747	10.7247	15.5996	10.3997	21.4495	20.4745	25.3494	22.4244
399	15.2746	19.1745	11.3747	11.3747	14.9496	10.7247	21.4495	19.8245	25.3494	22.7494
400	15.5996	19.4995	11.3747	11.0497	15.2746	10.3997	21.1245	20.1495	25.6744	23.3994
401	15.5996	19.1745	11.3747	11.3747	15.9246	10.0747	20.7995	19.8245	25.0244	23.0744
402	15.5996	19.1745	11.0497	11.0497	15.2746	10.7247	20.7995	20.1495	25.6744	23.0744
403	15.5996	19.1745	11.0497	10.7247	16.2496	10.3997	20.7995	20.1495	25.6744	22.7494
404	15.9246	19.4995	11.0497	10.7247	15.9246	10.7247	20.7995	20.4745	24.6994	22.4244
405	15.5996	19.1745	11.0497	10.7247	16.2496	10.7247	21.1245	20.1495	25.3494	23.0744
406	15.2746	18.8495	11.0497	10.7247	14.9496	10.7247	20.7995	20.1495	25.3494	22.4244
407	15.2746	19.4995	11.0497	11.3747	15.5996	10.7247	20.7995	20.4745	25.3494	22.7494
408	15.5996	19.1745	11.0497	10.7247	15.2746	10.3997	21.1245	20.1495	25.3494	22.7494
409	15.5996	19.1745	11.3747	10.7247	15.5996	10.3997	20.7995	20.4745	25.9994	22.7494
410	15.5996	19.4995	11.3747	10.7247	15.5996	10.3997	20.7995	20.4745	25.3494	22.7494
411	15.2746	19.4995	11.0497	10.7247	15.2746	10.3997	20.7995	20.1495	25.0244	22.4244
412	15.5996	19.1745	11.0497	10.7247	15.9246	10.7247	20.7995	20.1495	25.3494	23.7244
413	15.5996	19.4995	11.0497	11.0497	15.5996	10.7247	21.1245	19.8245	25.0244	23.3994
414	15.9246	19.1745	11.0497	11.0497	15.2746	10.7247	20.7995	19.8245	25.3494	22.7494
415	15.2746	18.8495	11.3747	10.7247	15.5996	10.7247	21.1245	20.4745	25.0244	23.3994
416	15.5996	19.4995	11.3747	10.7247	15.2746	10.7247	20.7995	20.1495	25.6744	22.7494
417	15.9246	19.1745	11.3747	10.7247	15.9246	10.3997	21.1245	19.8245	25.0244	23.0744
418	15.5996	19.1745	11.3747	10.7247	15.5996	10.3997	20.7995	20.4745	25.3494	22.7494
419	15.5996	19.4995	11.3747	11.0497	15.2746	10.3997	20.7995	20.1495	25.0244	23.0744
420	15.9246	19.4995	11.0497	10.7247	15.5996	10.3997	20.7995	20.1495	25.0244	23.0744
421	15.5996	19.1745	11.3747	10.7247	16.2496	10.3997	20.7995	20.4745	25.3494	22.7494
422	15.5996	19.4995	11.3747	10.7247	15.5996	10.0747	21.1245	20.1495	25.3494	23.0744
423	15.9246	19.1745	11.0497	10.7247	15.2746	10.7247	20.7995	20.4745	25.0244	22.7494
424	15.5996	19.1745	11.0497	10.7247	15.2746	10.3997	20.7995	20.4745	25.9994	23.0744
425	15.5996	19.1745	11.0497	10.7247	14.6246	10.7247	20.7995	20.1495	25.3494	23.0744
426	15.5996	19.1745	11.3747	10.7247	15.2746	10.7247	21.1245	20.1495	25.3494	22.7494
427	15.9246	19.1745	11.3747	10.7247	14.9496	10.7247	21.1245	20.1495	25.3494	23.3994
428	15.9246	18.8495	11.0497	10.7247	15.5996	10.0747	20.7995	20.4745	25.0244	22.7494
429	15.5996	18.8495	11.0497	10.7247	15.5996	10.7247	21.1245	20.4745	25.0244	23.0744
430	15.5996	18.8495	11.0497	10.7247	15.2746	10.0747	21.1245	20.4745	25.0244	22.7494
431	15.5996	18.8495	11.0497	10.7247	15.9246	10.7247	21.1245	20.4745	25.3494	23.0744
432	15.5996	19.1745	11.0497	10.7247	15.2746	10.7247	20.7995	20.1495	25.0244	23.0744
433	15.5996	19.1745	11.0497	10.7247	15.5996	10.7247	21.1245	20.4745	25.0244	23.3994
434	15.5996	19.4995	11.3747	10.7247	14.9496	10.7247	21.4495	20.1495	25.3494	23.3994
435	15.5996	19.1745	11.0497	10.7247	15.9246	10.7247	20.7995	20.4745	25.3494	23.3994
436	15.5996	19.4995	11.0497	10.7247	15.2746	10.7247	20.7995	20.1495	25.6744	23.0744
437	15.5996	19.8245	11.0497	10.3997	15.2746	10.0747	20.7995	20.4745	25.3494	22.4244
438	15.9246	18.8495	11.0497	10.7247	15.2746	10.0747	21.4495	20.1495	25.6744	22.7494
439	15.5996	18.8495	11.3747	10.7247	15.2746	10.3997	20.7995	20.1495	25.0244	22.7494
440	15.5996	19.1745	11.3747	10.7247	15.2746	10.0747	21.4495	20.4745	25.0244	23.0744
441	15.5996	19.4995	11.0497	10.7247	15.9246	10.3997	21.4495	20.4745	25.3494	23.3994
442	15.5996	19.4995	11.3747	10.7247	15.5996	10.7247	21.7745	19.8245	25.0244	22.7494
443	15.5996	18.8495	11.0497	11.0497	15.2746	10.3997	21.1245	19.8245	25.0244	23.3994
444	15.5996	18.8495	11.0497	10.7247	14.9496	10.0747	21.7745	20.4745	25.3494	23.0744
445	15.2746	19.4995	11.0497	10.7247	15.9246	10.0747	21.4495	20.4745	25.3494	23.0744
446	15.2746	19.4995	11.0497	10.7247	15.2746	10.7247	21.4495	20.4745	25.3494	23.7244
447	15.2746	19.1745	11.3747	10.7247	15.5996	10.3997	21.4495	20.4745	25.0244	23.0744
448	15.2746	19.1745	11.3747	10.7247	15.5996	10.0747	21.4495	20.1495	25.0244	23.7244
449	15.2746	19.1745	11.0497	10.7247	15.2746	10.3997	21.1245	20.1495	25.0244	23.0744
450	15.2746	19.1745	11.3747	10.7247	15.2746	10.7247	21.1245	20.4745	25.0244	22.7494
451	15.2746	19.4995	11.0497	10.7247	15.2746	10.7247	21.1245	20.1495	25.3494	22.7494
452	15.5996	19.4995	11.0497	10.7247	14.6246	10.3997	21.1245	20.4745	25.0244	23.3994
453	15.2746	18.8495	11.3747	10.7247	14.6246	10.3997	21.1245	20.4745	24.6994	23.0744
454	15.5996	19.4995	11.0497	10.7247	15.2746	10.7247	21.1245	20.1495	25.6744	22.7494
455	15.2746	19.1745	11.3747	10.7247	15.2746	10.7247	21.1245	20.4745	25.0244	23.0744
456	15.2746	19.4995	11.3747	10.7247	15.2746	10.7247	21.1245	20.4745	25.3494	23.3994
457	15.2746	19.4995	11.0497	10.7247	15.2746	10.0747	21.7745	20.4745	25.6744	23.0744
458	15.2746	19.4995	11.3747	10.7247	14.9496	10.3997	21.4495	20.4745	25.0244	24.3744
459	15.5996	19.1745	11.3747	10.7247	15.5996	10.0747	20.7995	20.4745	25.0244	23.0744
460	15.5996	19.4995	11.3747	10.7247	15.5996	10.3997	20.7995	20.4745	25.3494	23.0744
461	15.5996	19.4995	11.3747	10.7247	14.9496	10.7247	21.4495	20.4745	25.3494	22.7494
462	15.2746	19.4995	11.3747	10.7247	14.9496	10.3997	20.7995	20.1495	25.6744	23.0744
463	15.2746	19.1745	11.3747	10.7247	15.2746	10.3997	21.1245	20.1495	25.0244	23.0744
464	15.5996	19.4995	11.3747	10.7247	14.9496	10.3997	20.7995	20.4745	25.3494	24.0494
465	15.5996	19.1745	11.0497	10.7247	15.5996	10.3997	21.1245	20.4745	25.3494	23.3994
466	15.5996	19.1745	11.0497	10.7247	15.9246	10.3997	20.7995	20.4745	25.0244	22.7494
467	15.5996	19.1745	11.3747	10.7247	16.2496	10.0747	20.7995	20.1495	25.0244	23.0744
468	15.5996	19.1745	11.3747	10.7247	15.2746	10.0747	21.1245	20.1495	25.3494	23.0744
469	15.2746	19.1745	11.0497	10.7247	15.2746	10.7247	21.1245	20.1495	25.6744	23.0744
470	15.5996	18.8495	11.3747	10.7247	15.5996	10.0747	20.7995	20.4745	25.0244	22.7494
471	15.2746	19.1745	11.3747	11.0497	15.2746	10.3997	20.7995	20.4745	25.0244	23.0744
472	15.2746	18.8495	11.0497	10.7247	15.5996	10.0747	21.1245	20.4745	25.3494	22.4244
473	15.5996	19.1745	11.3747	11.0497	15.5996	10.0747	21.1245	20.1495	25.3494	22.7494
474	15.2746	19.4995	11.3747	10.7247	15.2746	10.7247	21.1245	20.1495	24.6994	22.4244
475	15.2746	19.1745	11.3747	10.7247	15.2746	10.0747	21.1245	20.4745	25.0244	22.7494
476	15.2746	19.1745	11.0497	10.7247	15.2746	10.0747	21.1245	20.1495	25.0244	22.4244
477	15.2746	19.1745	11.0497	11.0497	15.5996	10.7247	21.1245	20.4745	25.0244	23.0744
478	15.2746	19.1745	11.3747	10.7247	15.5996	10.3997	21.7745	20.1495	25.3494	23.0744
479	15.2746	19.4995	11.0497	10.7247	15.2746	10.3997	21.4495	19.8245	25.3494	22.7494
480	15.2746	18.8495	11.3747	10.3997	14.9496	10.3997	21.1245	20.4745	24.6994	23.0744
481	15.2746	19.4995	11.3747	10.7247	15.5996	10.0747	21.7745	20.1495	25.0244	23.0744
482	15.2746	19.1745	11.3747	10.7247	15.5996	10.0747	21.1245	20.1495	25.3494	22.4244
483	15.2746	19.1745	11.3747	10.7247	15.5996	10.3997	21.1245	20.4745	25.0244	22.7494
484	15.5996	19.4995	11.3747	11.0497	14.9496	10.7247	21.1245	20.4745	25.9994	22.7494
485	15.5996	19.4995	11.3747	10.7247	14.9496	10.7247	21.4495	20.1495	25.3494	23.0744
486	15.5996	19.4995	11.3747	10.3997	15.5996	10.3997	21.4495	20.1495	25.0244	22.4244
487	15.2746	19.1745	11.3747	10.7247	15.5996	10.0747	21.1245	20.1495	25.0244	23.0744
488	15.5996	19.1745	11.3747	10.7247	15.9246	10.7247	21.4495	20.4745	25.0244	23.3994
489	15.5996	19.4995	11.3747	10.7247	15.9246	10.3997	21.1245	20.4745	25.3494	23.7244
490	15.5996	19.4995	11.3747	10.7247	15.2746	10.3997	21.1245	19.8245	25.3494	23.7244
491	15.5996	19.4995	11.3747	10.7247	14.9496	10.3997	21.1245	20.4745	25.3494	23.3994
492	15.9246	19.4995	11.3747	10.3997	15.2746	10.0747	21.4495	20.1495	25.0244	23.0744
493	15.5996	19.4995	11.3747	10.3997	15.2746	10.3997	21.7745	20.1495	25.3494	23.0744
494	15.5996	19.4995	11.0497	10.7247	15.9246	10.3997	21.1245	20.4745	25.3494	23.3994
495	15.5996	19.1745	11.3747	10.7247	15.5996	10.3997	21.4495	20.1495	25.0244	23.3994
496	15.5996	19.4995	11.3747	10.0747	15.5996	10.7247	21.4495	20.1495	25.3494	23.0744
497	15.2746	19.4995	11.3747	10.7247	15.2746	10.0747	20.7995	20.4745	25.0244	22.0994
498	15.5996	19.1745	11.3747	10.3997	15.5996	10.3997	20.7995	20.4745	25.3494	23.3994
499	15.5996	19.4995	11.3747	10.3997	15.5996	10.3997	20.7995	20.4745	25.6744	22.7494
500	15.2746	19.1745	11.3747	10.3997	15.2746	10.3997	21.1245	20.4745	25.6744	24.0494
501	15.2746	19.4995	11.3747	10.7247	15.5996	10.3997	20.7995	20.1495	25.3494	23.7244
502	15.2746	19.4995	11.3747	11.6997	15.9246	10.3997	21.1245	20.1495	25.0244	22.7494
503	15.5996	19.4995	11.3747	11.6997	15.2746	10.3997	21.1245	20.4745	25.3494	23.0744
504	15.2746	19.1745	11.3747	11.3747	15.5996	10.3997	20.7995	20.1495	25.0244	23.3994
505	15.2746	19.4995	11.3747	11.3747	15.9246	10.0747	21.4495	20.1495	25.3494	22.7494
506	15.2746	19.4995	11.3747	11.3747	15.9246	10.3997	21.4495	20.4745	25.6744	22.7494
507	15.2746	19.4995	11.3747	11.3747	15.5996	10.3997	21.1245	20.4745	25.3494	22.7494
508	15.2746	19.1745	11.3747	12.0247	15.5996	10.3997	21.7745	20.1495	25.3494	22.4244
509	15.2746	19.4995	11.3747	12.0247	15.5996	10.3997	21.1245	20.1495	25.6744	22.7494
510	15.2746	19.4995	11.3747	12.0247	15.2746	10.7247	21.7745	20.1495	25.3494	22.7494
511	15.2746	19.4995	11.0497	12.0247	14.9496	10.7247	21.7745	20.1495	25.0244	23.3994
512	15.2746	19.4995	11.3747	11.6997	14.9496	10.3997	21.7745	19.8245	25.3494	23.0744
513	15.2746	19.4995	11.3747	11.6997	15.2746	10.3997	21.4495	20.4745	25.3494	22.0994
514	15.2746	19.1745	11.3747	11.3747	15.2746	10.3997	21.4495	20.1495	25.3494	22.7494
515	15.2746	19.4995	11.3747	11.6997	15.5996	10.0747	21.4495	20.1495	25.3494	23.3994
516	15.2746	19.1745	11.0497	11.6997	15.9246	10.7247	21.4495	20.1495	25.9994	23.7244
517	15.2746	19.4995	11.3747	12.0247	14.9496	10.7247	21.1245	19.8245	25.0244	22.7494
518	15.2746	19.4995	11.0497	11.6997	15.5996	10.7247	21.1245	20.4745	25.6744	23.3994
519	15.2746	19.4995	11.3747	11.6997	14.9496	10.3997	21.4495	20.4745	25.0244	23.3994
520	15.2746	19.4995	11.0497	11.3747	15.2746	10.3997	21.4495	20.1495	25.9994	23.0744
521	15.2746	19.1745	11.0497	11.6997	15.2746	10.7247	21.4495	20.1495	25.0244	22.7494
522	15.2746	19.4995	11.3747	12.0247	15.2746	10.7247	21.4495	20.1495	25.3494	22.0994
523	15.2746	19.4995	11.0497	12.3497	15.2746	10.7247	21.4495	20.1495	25.0244	22.7494
524	15.2746	19.4995	11.3747	11.6997	15.5996	10.7247	21.7745	20.1495	25.3494	23.0744
525	15.2746	19.4995	11.0497	11.6997	14.6246	10.7247	21.7745	20.4745	25.3494	22.7494
526	15.2746	19.4995	11.0497	11.6997	14.9496	10.7247	21.7745	20.1495	25.0244	23.0744
527	15.2746	19.4995	11.3747	11.6997	14.9496	10.3997	21.7745	20.4745	25.0244	23.7244
528	15.2746	19.4995	11.3747	12.0247	15.2746	10.3997	21.7745	20.4745	25.3494	23.3994
529	15.2746	19.4995	11.3747	11.6997	15.2746	10.3997	21.7745	20.1495	25.0244	23.3994
530	15.2746	19.4995	11.3747	11.6997	15.2746	10.3997	21.7745	20.1495	25.9994	22.7494
531	15.5996	19.4995	11.3747	11.3747	15.5996	10.3997	21.7745	20.1495	25.6744	22.4244
532	15.2746	19.4995	11.3747	12.0247	15.2746	10.3997	22.0994	20.1495	25.6744	22.7494
533	15.5996	19.4995	11.3747	11.3747	15.5996	10.7247	21.7745	20.1495	25.3494	23.3994
534	15.5996	19.4995	11.3747	11.6997	15.2746	10.3997	21.4495	20.1495	25.3494	23.3994
535	15.2746	19.4995	11.3747	11.0497	15.2746	10.7247	21.7745	20.1495	25.0244	23.3994
536	15.2746	19.8245	11.0497	11.6997	15.5996	10.3997	21.7745	20.4745	25.3494	23.0744
537	15.5996	19.8245	11.3747	11.6997	15.5996	10.3997	21.7745	19.8245	25.3494	23.0744
538	15.2746	19.8245	11.3747	11.6997	15.2746	10.3997	21.4495	20.1495	25.6744	23.0744
539	15.2746	19.4995	11.3747	12.0247	15.9246	10.0747	21.7745	20.1495	25.6744	22.7494
540	15.5996	19.4995	11.3747	11.6997	14.9496	10.3997	21.7745	20.1495	25.6744	23.0744
541	15.2746	19.1745	11.0497	11.3747	15.2746	10.0747	21.4495	20.4745	25.0244	23.0744
542	15.5996	19.1745	11.3747	11.6997	14.6246	10.3997	21.4495	19.8245	25.3494	23.0744
543	15.2746	19.1745	11.0497	11.3747	15.2746	10.7247	21.4495	20.4745	25.3494	23.0744
544	15.5996	19.4995	11.3747	11.6997	15.2746	10.7247	21.1245	20.1495	25.9994	22.7494
545	15.5996	19.1745	11.0497	11.3747	15.5996	10.3997	22.0994	20.1495	25.3494	23.0744
546	15.5996	19.4995	11.3747	11.3747	14.6246	10.3997	22.0994	20.4745	25.0244	23.3994
547	15.5996	19.4995	11.3747	11.3747	15.5996	10.3997	21.7745	20.1495	25.3494	23.3994
548	15.2746	19.4995	11.3747	11.6997	15.2746	10.7247	21.7745	20.1495	25.0244	23.7244
549	15.5996	19.4995	11.3747	11.3747	15.5996	10.3997	21.4495	20.1495	24.6994	22.7494
550	15.9246	19.4995	11.3747	11.6997	15.2746	10.3997	21.7745	20.1495	25.0244	22.4244
551	15.5996	19.4995	11.3747	11.3747	15.2746	10.3997	21.7745	20.4745	24.6994	23.0744
552	15.9246	19.4995	11.0497	11.6997	15.2746	10.3997	21.4495	19.8245	24.6994	23.0744
553	15.2746	19.4995	11.0497	11.3747	15.9246	10.3997	21.4495	19.8245	25.3494	22.7494
554	15.2746	19.4995	11.3747	11.6997	15.2746	10.3997	21.4495	20.4745	25.3494	23.3994
555	15.2746	19.4995	11.3747	11.3747	15.2746	10.7247	21.7745	20.4745	24.6994	23.0744
556	15.2746	19.4995	11.3747	11.3747	15.2746	10.3997	21.4495	20.4745	24.6994	23.0744
557	15.2746	19.4995	11.3747	11.3747	15.9246	10.7247	21.4495	20.1495	25.3494	23.3994
558	15.2746	19.4995	10.7247	11.6997	15.2746	10.3997	21.1245	20.1495	25.0244	23.7244
559	15.5996	19.4995	11.3747	11.6997	15.2746	10.3997	21.4495	20.1495	25.3494	23.7244
560	15.2746	19.1745	11.3747	11.3747	15.2746	10.3997	21.4495	20.1495	25.3494	23.7244
561	15.2746	19.4995	11.3747	11.3747	15.2746	10.3997	21.7745	20.1495	25.6744	23.3994
562	15.2746	19.4995	11.3747	11.3747	15.9246	10.3997	21.4495	20.1495	24.6994	23.0744
563	15.5996	19.4995	11.3747	11.3747	15.5996	10.3997	21.7745	20.1495	25.3494	24.3744
564	15.2746	19.4995	11.0497	11.3747	15.9246	10.3997	21.7745	20.1495	24.6994	23.3994
565	15.5996	19.4995	11.3747	11.3747	15.9246	10.3997	21.4495	19.8245	25.3494	22.4244
566	15.2746	19.1745	11.0497	11.3747	15.5996	10.3997	21.4495	20.1495	25.0244	23.0744
567	15.2746	19.4995	11.3747	11.6997	15.9246	10.7247	21.4495	20.1495	25.0244	23.7244
568	15.2746	19.1745	11.3747	11.3747	15.9246	10.3997	21.4495	20.1495	25.3494	22.7494
569	15.2746	19.4995	11.3747	11.6997	15.2746	10.3997	21.7745	20.4745	25.0244	23.0744
570	15.5996	19.4995	11.0497	11.3747	15.9246	10.3997	21.7745	20.1495	25.3494	24.0494
571	15.5996	19.1745	11.0497	11.3747	15.2746	10.3997	21.4495	19.8245	25.3494	23.0744
572	15.2746	19.4995	11.3747	11.3747	15.2746	10.3997	21.4495	20.1495	25.0244	23.7244
573	15.2746	19.4995	11.3747	11.6997	15.2746	10.3997	21.7745	20.1495	24.6994	23.3994
574	15.2746	19.4995	11.3747	11.6997	15.5996	10.7247	21.4495	20.1495	25.6744	23.0744
575	15.2746	19.4995	11.0497	11.3747	15.5996	10.3997	21.4495	20.4745	25.3494	23.0744
576	15.2746	19.1745	11.0497	11.3747	15.5996	10.3997	21.1245	20.1495	24.6994	23.7244
577	15.2746	19.4995	11.3747	11.3747	15.2746	10.3997	21.1245	19.8245	25.3494	23.3994
578	15.2746	19.4995	11.0497	11.3747	15.5996	10.0747	21.4495	20.1495	25.0244	23.0744
579	15.2746	19.8245	11.3747	11.0497	15.5996	10.7247	21.7745	20.4745	25.0244	22.7494
580	15.2746	19.4995	11.0497	11.6997	15.2746	10.3997	21.4495	20.1495	25.0244	23.3994
581	15.2746	19.8245	11.3747	10.7247	15.5996	10.3997	21.1245	20.4745	25.0244	23.7244
582	15.2746	19.4995	11.3747	11.6997	15.2746	10.0747	21.4495	20.1495	24.6994	23.0744
583	15.2746	19.8245	11.3747	11.3747	15.2746	10.3997	21.7745	20.1495	25.0244	23.0744
584	15.2746	19.4995	11.3747	11.6997	15.5996	10.3997	21.7745	20.4745	24.6994	23.3994
585	15.2746	19.4995	11.3747	11.3747	15.9246	10.7247	21.4495	20.1495	25.0244	23.7244
586	15.2746	19.4995	11.3747	11.0497	15.2746	10.3997	21.4495	20.1495	24.3744	22.4244
587	15.5996	19.4995	11.3747	11.0497	15.5996	10.3997	21.1245	20.1495	25.0244	23.0744
588	15.5996	19.4995	11.0497	11.3747	15.5996	10.3997	21.1245	20.4745	25.0244	23.3994
589	15.5996	19.4995	11.0497	11.3747	15.5996	10.3997	21.4495	20.1495	24.6994	22.7494
590	15.2746	19.4995	11.3747	11.3747	15.9246	10.3997	21.7745	20.1495	24.6994	22.4244
591	15.2746	19.4995	11.3747	11.0497	15.5996	10.3997	21.4495	20.1495	25.0244	23.3994
592	15.2746	19.4995	11.3747	11.0497	15.5996	10.0747	22.0994	20.1495	25.3494	23.7244
593	15.2746	19.4995	11.3747	11.0497	15.2746	10.3997	22.0994	20.1495	24.6994	23.0744
594	15.2746	19.4995	11.3747	11.0497	15.5996	10.3997	21.4495	20.1495	25.0244	22.7494
595	15.2746	19.1745	11.3747	11.3747	15.5996	10.3997	22.0994	20.1495	25.0244	23.3994
596	15.5996	19.4995	11.0497	11.3747	15.5996	10.3997	21.4495	20.4745	25.3494	23.7244
597	15.2746	19.4995	11.3747	11.3747	15.5996	10.3997	21.7745	20.4745	25.0244	23.3994
598	15.2746	19.4995	11.3747	10.7247	15.5996	10.3997	21.1245	20.1495	25.0244	23.3994
599	15.5996	19.4995	11.3747	11.3747	15.5996	10.3997	21.1245	20.1495	24.3744	23.7244
600	15.2746	19.4995	11.3747	11.0497	15.5996	10.3997	21.4495	20.1495	24.6994	23.3994
601	15.2746	19.4995	11.3747	11.3747	14.9496	10.3997	21.4495	20.4745	25.0244	23.3994
602	15.5996	19.4995	11.3747	11.6997	15.5996	10.3997	21.1245	20.1495	25.3494	22.7494
603	15.5996	19.8245	11.3747	11.0497	14.9496	10.3997	21.4495	20.1495	25.0244	23.3994
604	15.5996	19.1745	11.3747	11.3747	15.5996	10.7247	21.7745	20.1495	25.0244	23.0744
605	15.5996	19.4995	11.3747	11.0497	15.5996	10.3997	21.4495	20.1495	25.0244	23.3994
606	15.5996	19.1745	11.6997	11.3747	15.5996	10.3997	21.4495	20.1495	24.6994	24.0494
607	15.5996	19.4995	11.0497	11.3747	16.5746	10.3997	21.1245	19.8245	24.6994	23.3994
608	15.5996	19.4995	11.6997	11.3747	15.2746	10.3997	21.4495	20.1495	25.0244	22.7494
609	15.2746	19.4995	11.3747	11.0497	15.2746	10.3997	21.4495	20.1495	25.0244	23.7244
610	15.5996	19.4995	11.3747	11.3747	15.2746	10.3997	21.1245	19.8245	25.0244	23.7244
611	15.5996	19.4995	11.0497	11.3747	16.2496	10.3997	21.4495	20.4745	24.6994	23.3994
612	15.5996	19.4995	11.3747	11.3747	15.9246	10.3997	21.4495	19.8245	24.6994	23.3994
613	15.5996	19.1745	11.3747	11.0497	15.2746	10.3997	21.1245	20.1495	25.3494	23.3994
614	15.5996	19.1745	11.0497	11.3747	14.9496	10.3997	21.1245	20.4745	24.6994	22.7494
615	15.5996	19.4995	11.3747	11.3747	15.9246	10.3997	21.4495	20.1495	25.0244	23.0744
616	15.5996	19.4995	11.0497	11.6997	15.2746	10.3997	21.4495	20.1495	24.6994	23.0744
617	15.5996	19.4995	11.6997	11.0497	15.9246	10.3997	21.1245	20.1495	25.0244	23.0744
618	15.5996	19.4995	11.3747	11.3747	15.5996	10.3997	21.4495	20.1495	24.6994	23.3994
619	15.5996	19.4995	11.3747	11.3747	15.5996	10.3997	21.4495	20.1495	24.6994	23.0744
620	15.9246	19.4995	11.3747	11.0497	15.5996	10.3997	21.7745	20.1495	24.3744	23.0744
621	15.5996	19.4995	11.3747	11.3747	15.5996	10.3997	21.4495	20.4745	25.0244	22.7494
622	15.5996	19.4995	11.3747	11.0497	15.9246	10.3997	21.4495	20.1495	25.0244	23.7244
623	15.5996	19.4995	11.3747	11.3747	15.9246	10.3997	21.4495	20.1495	24.6994	23.7244
624	15.5996	19.4995	11.0497	11.0497	15.9246	10.3997	21.4495	20.1495	25.0244	23.0744
625	15.5996	19.4995	11.3747	11.0497	15.9246	10.3997	21.4495	20.1495	24.6994	23.0744
626	15.5996	19.4995	11.0497	11.0497	15.5996	10.3997	21.7745	20.1495	25.0244	23.3994
627	15.5996	20.1495	11.3747	11.3747	15.5996	10.3997	20.7995	20.1495	25.0244	23.7244
628	15.5996	19.4995	11.3747	11.3747	14.9496	10.3997	20.7995	20.1495	25.0244	23.7244
629	15.5996	19.4995	11.3747	11.3747	15.2746	10.7247	21.1245	20.1495	24.3744	23.3994
630	15.5996	19.4995	11.3747	11.0497	15.5996	10.7247	21.1245	20.1495	25.0244	23.0744
631	15.5996	19.1745	11.0497	11.0497	15.2746	10.3997	21.4495	20.1495	24.6994	23.3994
632	15.5996	19.4995	11.6997	11.0497	15.5996	10.3997	21.4495	20.1495	24.6994	23.3994
633	15.5996	19.4995	11.3747	11.0497	15.5996	10.3997	21.4495	20.1495	24.6994	24.3744
634	15.5996	19.8245	11.3747	11.3747	15.2746	10.3997	21.4495	20.1495	24.3744	23.3994
635	15.5996	19.4995	11.0497	11.0497	15.9246	10.3997	21.4495	20.1495	24.3744	23.3994
636	15.5996	19.1745	11.0497	11.0497	15.5996	10.3997	21.1245	20.1495	25.3494	24.3744
637	15.5996	19.4995	11.6997	11.3747	15.5996	10.3997	21.1245	20.4745	25.0244	23.0744
638	15.5996	19.4995	11.3747	11.0497	15.5996	10.3997	20.7995	20.1495	24.3744	23.7244
639	15.9246	19.4995	10.7247	11.0497	15.2746	10.3997	21.4495	20.1495	24.3744	23.3994
640	15.5996	19.8245	11.3747	11.0497	15.5996	10.7247	21.4495	20.1495	24.3744	23.0744
641	15.5996	19.4995	11.3747	10.7247	15.2746	10.3997	21.1245	20.1495	24.6994	23.7244
642	15.5996	19.4995	11.0497	11.0497	15.5996	10.3997	21.1245	20.1495	24.6994	23.3994
643	15.5996	19.1745	11.3747	11.0497	16.2496	10.3997	20.7995	20.1495	24.3744	23.3994
644	15.5996	19.4995	11.3747	10.7247	15.9246	10.3997	21.4495	20.1495	24.3744	23.0744
645	15.2746	19.4995	11.0497	11.0497	16.2496	10.3997	21.4495	20.1495	24.6994	23.3994
646	15.5996	19.4995	11.0497	11.3747	15.2746	10.3997	21.4495	20.4745	24.3744	23.0744
647	15.5996	19.4995	11.3747	11.0497	15.2746	10.3997	20.7995	20.1495	24.6994	23.7244
648	15.2746	19.4995	11.0497	10.7247	15.9246	10.3997	21.4495	19.8245	24.6994	23.0744
649	15.2746	19.4995	11.6997	10.7247	15.9246	10.3997	21.1245	20.1495	24.6994	23.3994
650	15.2746	19.4995	11.0497	11.0497	15.9246	10.3997	21.1245	20.1495	24.6994	23.7244
651	15.5996	19.4995	11.0497	10.7247	15.9246	10.3997	21.4495	20.1495	25.0244	23.3994
652	15.5996	19.4995	11.3747	11.0497	15.5996	10.3997	21.4495	20.1495	24.6994	23.3994
653	15.5996	19.1745	11.3747	11.0497	15.2746	10.3997	21.4495	20.4745	24.6994	23.3994
654	15.2746	19.4995	11.3747	10.7247	15.9246	10.3997	21.1245	19.8245	24.6994	23.3994
655	15.5996	19.4995	11.6997	10.7247	15.5996	10.3997	21.1245	20.1495	24.6994	23.0744
656	15.5996	19.4995	11.0497	10.7247	15.9246	10.3997	21.4495	20.4745	24.6994	24.3744
657	15.5996	19.1745	11.6997	11.0497	15.5996	10.3997	21.1245	20.1495	25.0244	23.7244
658	15.5996	19.4995	11.3747	10.7247	15.9246	10.3997	21.7745	20.1495	25.0244	22.7494
659	15.2746	19.4995	11.0497	11.0497	15.9246	10.3997	21.4495	20.4745	24.6994	23.0744
660	15.5996	19.4995	11.3747	10.7247	14.9496	10.3997	21.4495	20.1495	24.6994	23.3994
661	15.5996	19.1745	11.3747	11.0497	15.9246	10.3997	21.4495	20.1495	24.6994	22.4244
662	15.2746	19.1745	11.0497	10.7247	16.2496	10.3997	21.1245	20.1495	25.3494	23.3994
663	15.5996	19.4995	11.0497	11.0497	15.9246	10.3997	21.4495	20.1495	25.0244	23.7244
664	15.5996	19.4995	11.6997	11.0497	15.2746	10.3997	21.7745	20.4745	24.6994	24.0494
665	15.2746	19.4995	11.3747	11.0497	15.2746	10.3997	20.7995	20.1495	24.3744	24.0494
666	15.2746	19.4995	11.3747	10.7247	15.5996	10.3997	21.4495	20.1495	25.0244	23.7244
667	15.2746	19.4995	11.3747	10.7247	15.2746	10.3997	21.4495	20.1495	24.6994	23.0744
668	15.2746	19.4995	11.0497	11.0497	15.5996	10.3997	21.1245	20.1495	24.6994	23.3994
669	15.2746	19.1745	11.6997	10.7247	15.5996	10.3997	21.1245	20.1495	25.3494	22.7494
670	15.5996	19.4995	11.0497	11.0497	15.5996	10.3997	21.4495	20.1495	24.6994	23.0744
671	15.2746	19.4995	11.0497	10.7247	15.2746	10.3997	21.4495	20.1495	24.6994	23.7244
672	15.2746	19.4995	11.3747	10.7247	15.9246	10.3997	21.4495	20.1495	24.6994	24.0494
673	15.2746	19.4995	11.6997	11.0497	15.2746	10.3997	21.1245	20.1495	25.3494	23.7244
674	15.2746	19.4995	11.3747	11.0497	15.2746	10.0747	21.1245	20.1495	25.0244	23.3994
675	15.2746	19.4995	11.3747	11.0497	15.5996	10.0747	21.1245	20.4745	24.3744	23.3994
676	15.5996	19.4995	11.3747	11.0497	15.2746	10.3997	21.4495	20.1495	24.3744	23.7244
677	15.2746	19.4995	11.6997	10.7247	15.5996	10.3997	21.4495	20.1495	24.3744	23.7244
678	15.5996	19.4995	11.6997	11.0497	15.2746	10.3997	21.1245	20.1495	24.3744	23.7244
679	15.2746	19.1745	11.6997	11.0497	15.5996	10.3997	21.4495	20.1495	25.0244	23.7244
680	15.2746	19.1745	11.3747	11.0497	15.2746	10.3997	21.4495	20.1495	25.0244	23.0744
681	15.2746	19.4995	11.0497	11.0497	15.2746	10.3997	21.1245	20.1495	25.0244	23.7244
682	15.2746	19.1745	11.0497	11.0497	15.2746	10.3997	21.4495	20.4745	24.6994	23.3994
683	15.2746	19.1745	11.6997	11.0497	15.2746	10.0747	21.1245	20.1495	24.6994	23.3994
684	15.2746	19.1745	11.6997	11.0497	15.5996	10.3997	21.1245	20.4745	24.3744	23.3994
685	15.2746	19.1745	11.6997	11.0497	15.9246	10.3997	21.1245	20.1495	25.3494	23.0744
686	14.9496	19.4995	11.6997	11.0497	15.9246	10.3997	21.1245	20.1495	25.0244	23.0744
687	14.9496	19.1745	11.3747	11.0497	16.5746	10.3997	21.1245	20.1495	24.6994	23.0744
688	15.2746	19.4995	11.6997	11.0497	15.5996	10.3997	21.4495	20.1495	24.6994	23.0744
689	15.2746	19.1745	11.6997	11.0497	15.2746	10.3997	21.1245	20.1495	24.6994	23.3994
690	15.2746	19.1745	11.3747	11.0497	15.9246	10.3997	21.4495	20.1495	25.0244	23.0744
691	14.9496	19.1745	11.6997	11.0497	15.9246	10.3997	21.1245	20.1495	24.6994	23.3994
692	15.5996	19.1745	11.6997	11.0497	15.5996	10.3997	21.1245	20.1495	24.6994	22.7494
693	15.5996	19.4995	11.3747	11.0497	15.9246	10.3997	21.1245	20.4745	25.0244	22.4244
694	15.5996	19.8245	11.0497	10.7247	15.9246	10.3997	21.4495	20.4745	25.0244	23.0744
695	15.5996	19.4995	11.6997	11.0497	15.2746	10.3997	21.1245	20.1495	25.0244	23.7244
696	15.5996	19.4995	11.0497	11.0497	15.5996	10.0747	21.4495	19.8245	25.0244	23.3994
697	15.2746	19.4995	11.3747	11.0497	16.2496	10.3997	21.7745	20.1495	24.6994	23.0744
698	15.2746	19.4995	11.0497	10.7247	15.9246	10.3997	21.1245	20.1495	25.0244	23.0744
699	15.2746	18.8495	11.0497	10.7247	15.2746	10.3997	21.1245	20.1495	25.0244	23.3994
700	15.2746	19.1745	11.6997	10.7247	14.9496	10.0747	21.1245	20.1495	25.0244	24.0494
701	15.2746	19.1745	11.0497	10.7247	15.5996	10.3997	21.4495	20.1495	25.0244	23.7244
702	15.2746	19.1745	11.3747	10.7247	15.5996	10.3997	21.7745	20.1495	25.0244	23.0744
703	15.2746	19.1745	11.0497	10.7247	15.5996	10.3997	21.7745	20.1495	25.0244	23.7244
704	15.2746	19.1745	11.3747	11.0497	15.9246	10.3997	21.4495	19.8245	24.6994	23.3994
705	15.2746	19.1745	11.0497	10.7247	15.9246	10.3997	21.1245	20.1495	25.0244	22.4244
706	15.2746	18.8495	11.3747	11.0497	15.9246	10.3997	21.1245	20.1495	24.6994	22.7494
707	15.2746	19.8245	11.0497	10.7247	15.5996	10.3997	21.4495	20.1495	24.6994	22.7494
708	15.2746	19.4995	11.3747	11.0497	15.5996	10.3997	21.1245	20.1495	24.6994	23.3994
709	15.2746	19.1745	11.3747	10.7247	15.5996	10.3997	21.1245	19.8245	25.0244	22.7494
710	15.2746	19.1745	11.3747	11.0497	15.9246	10.3997	21.1245	20.1495	24.6994	23.3994
711	15.2746	19.1745	11.3747	11.0497	15.5996	10.3997	21.7745	20.1495	25.0244	23.3994
712	15.2746	19.1745	11.3747	11.0497	15.2746	10.3997	21.4495	20.4745	24.3744	23.3994
713	15.2746	19.1745	11.0497	11.0497	15.2746	10.3997	21.7745	20.1495	24.6994	23.3994
714	15.2746	19.1745	11.3747	10.7247	15.5996	10.3997	21.1245	20.1495	24.6994	23.7244
715	15.2746	19.4995	11.3747	11.0497	15.5996	10.3997	21.1245	20.1495	24.6994	23.3994
716	15.2746	19.4995	11.3747	10.7247	15.2746	10.3997	21.4495	20.1495	24.6994	23.7244
717	15.2746	19.1745	11.0497	11.0497	15.2746	10.3997	21.1245	20.1495	24.3744	24.0494
718	15.2746	19.4995	11.0497	12.6747	15.5996	10.3997	21.7745	20.1495	25.0244	23.3994
719	15.2746	19.4995	11.0497	11.6997	15.5996	10.3997	21.7745	20.1495	24.6994	23.0744
720	15.2746	19.4995	11.0497	11.6997	15.5996	10.0747	21.4495	19.8245	24.6994	22.7494
721	14.9496	19.1745	11.0497	11.6997	15.5996	10.3997	20.7995	20.1495	24.6994	23.0744
722	14.6246	19.4995	11.0497	11.6997	15.2746	10.3997	21.1245	20.1495	25.0244	23.7244
723	14.9496	19.1745	11.0497	11.6997	15.5996	10.3997	21.7745	19.8245	24.6994	23.0744
724	14.6246	19.1745	11.0497	11.6997	15.2746	10.3997	21.7745	20.1495	25.0244	23.7244
725	14.9496	19.4995	11.0497	11.6997	15.9246	10.7247	21.1245	20.1495	24.6994	23.0744
726	15.2746	19.4995	11.0497	12.0247	15.5996	10.3997	21.4495	20.1495	25.0244	22.7494
727	14.9496	19.4995	11.3747	11.6997	15.2746	10.7247	21.1245	20.4745	25.0244	23.3994
728	15.2746	19.4995	11.0497	11.6997	15.2746	10.3997	21.4495	20.1495	24.3744	23.3994
729	15.2746	19.8245	11.0497	11.6997	15.2746	10.3997	21.1245	20.1495	25.0244	23.0744
730	15.2746	19.4995	11.0497	12.0247	15.2746	10.3997	21.4495	19.8245	25.3494	23.7244
731	15.2746	19.4995	11.0497	11.6997	15.2746	10.0747	21.1245	20.1495	24.6994	23.0744
732	15.2746	19.4995	11.0497	11.6997	15.2746	10.3997	21.4495	20.1495	24.6994	23.3994
733	15.5996	19.8245	11.3747	11.6997	15.2746	10.3997	21.1245	20.1495	24.6994	23.3994
734	15.2746	19.1745	11.0497	11.6997	15.9246	10.3997	21.7745	20.4745	24.6994	23.0744
735	15.2746	19.4995	11.0497	11.6997	15.2746	10.3997	21.4495	19.8245	24.6994	23.0744
736	15.5996	19.8245	11.0497	11.6997	15.2746	10.3997	21.1245	20.4745	24.3744	23.7244
737	15.5996	19.4995	11.3747	12.0247	14.9496	10.3997	21.4495	20.1495	24.6994	22.7494
738	15.5996	19.4995	11.0497	11.6997	14.9496	10.3997	21.4495	20.1495	25.0244	23.3994
739	15.5996	19.4995	11.0497	11.3747	15.9246	10.3997	21.1245	20.1495	24.6994	23.0744
740	15.2746	19.4995	11.3747	11.3747	16.2496	10.3997	21.1245	19.8245	24.6994	23.7244
741	15.5996	19.4995	11.3747	11.3747	14.9496	10.3997	21.1245	20.1495	24.6994	23.0744
742	15.2746	19.4995	11.0497	11.6997	15.9246	10.3997	21.4495	19.8245	24.6994	23.7244
743	15.2746	19.4995	11.3747	11.3747	15.5996	10.3997	21.1245	20.1495	24.6994	23.3994
744	15.2746	19.4995	11.0497	11.3747	15.5996	10.3997	21.1245	20.1495	24.6994	23.0744
745	15.5996	19.4995	11.0497	11.3747	15.2746	10.3997	21.1245	20.1495	24.3744	23.0744
746	15.5996	19.4995	11.3747	11.6997	15.2746	10.3997	21.1245	20.4745	24.6994	22.7494
747	15.2746	19.4995	11.3747	11.6997	15.5996	10.3997	20.7995	20.1495	25.0244	23.3994
748	15.2746	19.4995	11.0497	11.6997	15.5996	10.3997	21.4495	19.8245	24.3744	22.7494
749	15.2746	19.1745	11.0497	11.3747	15.5996	10.3997	21.7745	20.1495	24.3744	22.4244
750	15.2746	19.1745	11.0497	11.3747	15.5996	10.3997	21.1245	20.1495	24.6994	22.4244
751	15.2746	19.1745	11.3747	11.3747	15.5996	10.3997	21.4495	20.1495	24.3744	23.3994
752	15.2746	19.1745	11.0497	11.3747	15.2746	10.3997	20.7995	20.4745	24.6994	23.0744
753	15.2746	19.1745	11.0497	11.3747	15.2746	10.3997	21.4495	20.1495	24.6994	23.3994
754	14.9496	19.4995	11.3747	11.3747	15.5996	10.3997	21.1245	20.1495	24.3744	23.0744
755	15.2746	19.4995	11.3747	11.0497	15.2746	10.3997	21.4495	20.1495	25.0244	23.0744
756	15.2746	19.1745	11.0497	11.3747	15.2746	10.3997	21.1245	20.1495	25.0244	23.0744
757	14.9496	19.4995	11.3747	11.3747	15.2746	10.3997	21.1245	20.1495	24.6994	22.7494
758	14.9496	19.4995	11.0497	11.3747	15.5996	10.3997	21.7745	20.1495	24.6994	23.0744
759	15.2746	19.4995	11.3747	11.0497	15.5996	10.3997	21.4495	20.1495	24.3744	22.7494
760	14.9496	19.8245	11.0497	11.3747	15.2746	10.3997	20.7995	19.8245	24.3744	23.0744
761	14.9496	19.4995	11.3747	11.0497	15.2746	10.0747	21.1245	20.1495	24.6994	22.7494
762	15.2746	19.1745	11.3747	11.3747	15.2746	10.3997	21.1245	20.1495	25.0244	23.0744
763	14.9496	19.1745	11.3747	11.6997	15.5996	10.3997	21.1245	20.1495	24.3744	23.0744
764	15.2746	18.8495	11.0497	10.7247	15.2746	10.3997	21.4495	20.1495	24.3744	22.7494
765	15.2746	19.4995	11.0497	11.3747	15.9246	10.3997	21.7745	20.1495	24.6994	22.4244
766	14.9496	19.1745	11.0497	11.6997	15.5996	10.3997	21.1245	20.1495	24.6994	23.3994
767	15.2746	19.4995	11.0497	11.3747	15.5996	10.3997	21.4495	20.1495	24.3744	23.0744
768	15.2746	19.8245	11.3747	11.3747	15.9246	10.3997	20.4745	20.1495	24.6994	23.3994
769	14.9496	19.4995	11.3747	11.0497	15.9246	10.3997	21.1245	19.8245	24.6994	23.0744
770	14.9496	19.4995	11.3747	11.0497	15.5996	10.3997	21.1245	20.1495	24.6994	23.3994
771	15.2746	19.4995	11.0497	11.0497	15.2746	10.3997	21.4495	20.4745	24.6994	22.4244
772	15.2746	19.4995	11.3747	11.3747	15.2746	10.3997	21.1245	19.8245	24.6994	23.0744
773	15.2746	19.4995	11.3747	11.3747	14.9496	10.3997	20.7995	20.1495	24.6994	23.0744
774	15.2746	19.4995	11.3747	10.7247	15.2746	10.3997	20.7995	20.1495	24.6994	23.0744
775	15.2746	19.4995	11.3747	11.3747	15.5996	10.3997	21.1245	19.8245	24.6994	23.0744
776	15.2746	19.4995	11.3747	11.0497	15.9246	10.3997	20.4745	20.1495	24.6994	23.0744
777	15.2746	19.4995	11.0497	11.3747	15.5996	10.3997	20.1495	20.1495	24.6994	22.7494
778	15.2746	19.4995	11.0497	11.0497	15.5996	10.3997	20.7995	20.1495	24.6994	23.3994
779	15.2746	19.1745	11.3747	11.3747	15.5996	10.3997	21.7745	20.1495	24.3744	22.7494
780	15.2746	19.4995	11.3747	11.0497	15.5996	10.3997	21.4495	19.8245	24.6994	23.7244
781	15.2746	19.4995	11.3747	11.0497	15.5996	10.3997	20.7995	20.1495	24.3744	23.3994
782	15.2746	19.4995	11.6997	11.0497	15.9246	10.3997	20.7995	20.1495	25.0244	22.7494
783	15.2746	19.4995	11.3747	11.3747	15.5996	10.3997	20.7995	20.1495	24.6994	23.0744
784	15.2746	19.4995	11.3747	10.7247	15.5996	10.3997	21.1245	20.1495	25.0244	22.4244
785	15.2746	19.1745	11.3747	11.0497	15.5996	10.3997	21.4495	19.8245	24.0494	23.0744
786	15.2746	19.4995	11.3747	11.3747	15.5996	10.3997	20.7995	19.8245	24.6994	23.0744
787	15.2746	19.8245	11.3747	11.0497	15.9246	10.3997	20.4745	19.8245	24.6994	22.4244
788	15.2746	19.1745	11.6997	11.0497	15.5996	10.3997	20.7995	20.1495	24.3744	23.3994
789	15.5996	19.4995	11.0497	11.3747	15.5996	10.0747	21.4495	19.8245	24.3744	24.0494
790	15.2746	19.4995	11.6997	11.0497	15.5996	10.3997	21.4495	19.8245	25.0244	23.0744
791	15.2746	19.4995	11.3747	10.7247	15.5996	10.3997	21.7745	20.1495	24.6994	23.3994
792	15.2746	19.4995	11.0497	11.0497	15.2746	10.3997	21.4495	20.1495	24.6994	24.0494
793	15.2746	19.4995	11.3747	11.0497	15.2746	10.3997	21.1245	20.1495	24.3744	23.7244
794	15.2746	19.4995	11.3747	11.0497	15.2746	10.3997	21.1245	19.8245	24.6994	23.7244
795	15.2746	19.4995	11.6997	11.0497	15.2746	10.3997	21.1245	20.1495	24.6994	22.7494
796	15.2746	19.1745	11.3747	10.7247	15.2746	10.3997	21.1245	20.1495	24.6994	22.7494
797	15.2746	19.4995	11.3747	11.3747	15.5996	10.3997	20.7995	20.1495	24.3744	23.7244
798	15.2746	19.1745	11.3747	11.3747	15.5996	10.3997	20.7995	20.1495	25.0244	23.3994
799	15.2746	19.8245	11.0497	10.7247	15.5996	10.3997	22.0994	19.8245	24.6994	23.7244
800	15.2746	19.4995	11.3747	11.0497	15.5996	10.3997	21.4495	20.1495	24.3744	22.7494
801	15.2746	19.8245	11.3747	11.0497	15.5996	10.3997	21.4495	20.1495	24.6994	23.0744
802	15.2746	19.1745	11.0497	11.0497	15.2746	10.3997	21.4495	20.1495	24.3744	23.3994
803	15.2746	19.1745	11.0497	11.3747	15.2746	10.3997	21.1245	20.1495	25.0244	23.0744
804	15.2746	19.4995	11.0497	11.0497	15.5996	10.3997	21.1245	20.1495	24.6994	22.7494
805	15.2746	19.1745	11.0497	10.7247	15.9246	10.3997	21.1245	19.8245	24.6994	23.0744
806	15.2746	19.4995	11.0497	11.0497	15.9246	10.3997	20.7995	20.1495	24.6994	23.3994
807	15.2746	19.4995	11.0497	10.7247	15.5996	10.3997	21.1245	19.8245	24.6994	23.0744
808	15.2746	19.4995	11.0497	10.7247	15.2746	10.3997	20.4745	19.8245	24.6994	23.0744
809	15.2746	19.8245	11.0497	10.7247	15.2746	10.3997	21.4495	19.8245	24.6994	22.7494
810	15.2746	19.1745	11.0497	10.7247	15.2746	10.3997	21.1245	20.1495	24.6994	23.3994
811	15.2746	19.4995	11.0497	11.0497	15.2746	10.3997	21.1245	20.1495	24.6994	22.7494
812	15.2746	19.4995	11.3747	11.3747	15.2746	10.3997	21.4495	20.1495	24.6994	23.3994
813	15.2746	19.1745	11.6997	11.0497	15.2746	10.3997	21.4495	20.1495	24.6994	23.7244
814	15.2746	19.4995	11.3747	10.7247	15.5996	10.3997	20.7995	20.1495	24.6994	23.0744
815	15.2746	19.4995	11.3747	10.7247	15.2746	10.3997	21.1245	20.1495	24.6994	22.7494
816	15.2746	19.1745	11.0497	10.7247	15.2746	10.3997	21.4495	20.1495	24.6994	23.3994
817	15.2746	19.4995	11.3747	10.7247	15.5996	10.3997	21.7745	20.1495	25.0244	22.4244
818	15.2746	19.4995	11.0497	11.0497	16.2496	10.3997	21.1245	20.1495	24.6994	23.0744
819	15.2746	19.4995	11.0497	10.7247	15.5996	10.3997	21.4495	19.8245	24.6994	22.7494
820	14.9496	19.4995	11.0497	10.7247	15.9246	10.3997	21.7745	20.1495	24.6994	23.0744
821	14.9496	19.4995	11.6997	10.7247	15.2746	10.3997	21.4495	20.1495	24.6994	22.7494
822	14.9496	19.4995	11.0497	10.7247	15.5996	10.3997	21.1245	20.1495	24.6994	22.7494
823	14.9496	19.4995	11.0497	10.7247	15.9246	10.3997	20.7995	20.1495	25.0244	22.4244
824	14.6246	19.4995	11.0497	11.0497	15.2746	10.3997	20.7995	20.1495	24.6994	23.0744
825	14.6246	19.8245	11.3747	11.0497	15.2746	10.3997	20.4745	19.8245	24.6994	23.3994
826	14.9496	19.1745	11.3747	10.3997	15.9246	10.0747	21.4495	20.1495	24.6994	23.0744
827	14.9496	19.4995	11.3747	10.7247	15.2746	10.3997	21.4495	20.1495	24.6994	22.4244
828	14.9496	19.4995	11.0497	10.3997	15.2746	10.0747	20.4745	20.1495	25.3494	22.7494
829	14.9496	19.8245	11.0497	10.7247	15.5996	10.3997	20.7995	20.1495	24.6994	22.7494
830	14.9496	19.8245	11.3747	10.3997	14.9496	10.3997	21.1245	20.1495	24.6994	23.0744
831	14.9496	19.4995	11.0497	11.0497	14.9496	10.3997	21.1245	19.8245	25.0244	22.7494
832	14.9496	19.8245	11.3747	11.3747	15.5996	10.3997	21.4495	20.1495	24.3744	23.0744
833	14.9496	19.1745	11.6997	11.0497	14.9496	10.3997	22.0994	19.8245	24.6994	23.0744
834	14.6246	19.4995	11.0497	10.3997	15.2746	10.3997	20.7995	20.1495	25.0244	22.0994
835	14.6246	19.1745	11.3747	10.3997	15.5996	10.3997	21.1245	20.1495	24.6994	23.0744
836	14.9496	19.4995	11.6997	10.3997	15.2746	10.0747	21.1245	20.1495	24.6994	22.7494
837	14.6246	19.4995	11.3747	10.3997	15.5996	10.3997	21.4495	20.1495	24.6994	22.7494
838	14.9496	19.8245	11.3747	10.7247	15.5996	10.0747	21.4495	19.8245	25.0244	22.7494
839	14.9496	19.4995	11.0497	10.3997	15.2746	10.0747	22.0994	20.1495	25.0244	23.0744
840	14.9496	19.4995	11.3747	10.3997	15.2746	10.3997	21.4495	20.1495	25.6744	23.0744
841	14.9496	19.4995	11.3747	10.3997	14.9496	10.3997	22.0994	19.4995	25.0244	22.0994
842	14.9496	19.4995	11.3747	11.0497	14.9496	10.0747	22.0994	20.1495	24.6994	22.4244
843	14.9496	19.4995	11.3747	10.3997	14.9496	10.3997	22.0994	20.1495	24.6994	22.4244
844	14.9496	18.8495	11.3747	10.3997	15.5996	10.3997	21.7745	19.8245	24.3744	23.0744
845	14.9496	19.8245	11.3747	10.7247	15.5996	10.3997	21.7745	19.4995	24.6994	22.4244
846	14.9496	19.4995	11.6997	10.7247	15.2746	10.3997	22.0994	20.1495	25.0244	23.0744
847	14.9496	19.4995	11.6997	10.7247	14.9496	10.3997	21.7745	19.8245	24.6994	23.0744
848	14.9496	19.1745	11.3747	10.7247	15.5996	10.3997	21.7745	20.1495	24.6994	23.0744
849	14.9496	19.8245	11.6997	10.3997	15.2746	10.0747	22.0994	20.1495	24.6994	22.7494
850	14.9496	19.8245	11.0497	10.7247	14.9496	10.3997	22.0994	20.1495	24.6994	23.3994
851	14.9496	20.1495	11.3747	10.7247	15.2746	10.3997	21.4495	20.1495	24.6994	22.7494
852	14.9496	19.8245	11.0497	10.3997	15.5996	10.3997	21.7745	20.1495	24.6994	23.0744
853	14.9496	19.4995	11.3747	10.3997	15.2746	10.3997	21.7745	20.1495	24.6994	22.4244
854	14.9496	19.8245	11.6997	10.3997	14.9496	10.3997	21.4495	19.8245	24.3744	22.4244
855	14.9496	19.4995	11.3747	10.3997	15.2746	10.3997	21.4495	19.8245	24.6994	23.3994
856	14.9496	19.4995	11.3747	10.7247	15.2746	10.3997	21.4495	20.1495	24.6994	23.0744
857	14.9496	19.1745	11.3747	10.7247	15.5996	10.3997	22.0994	20.1495	24.6994	22.7494
858	14.9496	19.8245	11.3747	10.7247	15.5996	10.3997	21.1245	19.8245	24.6994	22.7494
859	14.9496	19.8245	11.6997	10.3997	15.5996	10.3997	21.1245	20.1495	24.6994	23.0744
860	14.9496	19.8245	11.6997	10.3997	15.5996	10.3997	20.7995	19.8245	25.0244	22.7494
861	14.9496	19.8245	11.6997	10.3997	15.5996	10.3997	21.7745	19.8245	25.0244	23.0744
862	14.9496	19.8245	11.6997	10.7247	15.2746	10.0747	22.0994	19.8245	24.6994	23.0744
863	14.9496	19.1745	11.3747	10.7247	15.5996	10.3997	21.4495	20.1495	24.6994	23.0744
864	14.9496	19.8245	11.3747	10.7247	15.2746	10.0747	21.4495	20.1495	24.3744	23.3994
865	14.9496	19.8245	11.0497	10.3997	15.5996	10.3997	21.4495	20.1495	25.0244	23.3994
866	14.9496	19.8245	11.3747	10.3997	15.2746	10.3997	21.4495	19.8245	24.6994	22.7494
867	14.9496	19.1745	11.6997	10.7247	15.5996	10.3997	21.4495	19.8245	24.6994	22.4244
868	14.9496	19.4995	11.6997	10.7247	15.5996	10.3997	21.4495	19.8245	24.6994	22.7494
869	14.9496	19.4995	11.0497	10.7247	15.5996	10.3997	21.4495	19.8245	24.6994	23.0744
870	14.9496	19.8245	11.6997	10.7247	15.5996	10.3997	21.7745	20.1495	24.6994	23.7244
871	14.9496	19.4995	11.0497	10.3997	15.2746	10.3997	21.7745	19.8245	24.6994	22.7494
872	14.9496	19.8245	11.3747	10.7247	15.9246	10.3997	21.1245	20.1495	24.6994	23.0744
873	14.9496	19.8245	11.6997	10.7247	15.5996	10.0747	21.7745	19.8245	24.6994	23.0744
874	14.6246	19.4995	11.6997	10.3997	15.5996	10.0747	20.7995	19.8245	25.0244	23.0744
875	14.9496	19.8245	11.6997	10.3997	14.9496	10.3997	21.7745	19.8245	25.0244	23.0744
876	14.9496	19.4995	11.3747	10.3997	15.5996	10.3997	21.7745	19.8245	25.0244	23.3994
877	14.9496	19.8245	11.6997	10.3997	14.9496	10.3997	21.4495	19.8245	25.0244	23.0744
878	14.9496	19.8245	11.3747	10.3997	14.6246	10.3997	21.7745	19.8245	24.6994	23.0744
879	14.9496	19.4995	11.6997	10.7247	15.2746	10.3997	21.7745	20.1495	25.0244	23.0744
880	14.9496	19.4995	11.6997	10.7247	15.2746	10.3997	21.7745	20.1495	24.6994	22.7494
881	14.9496	19.4995	11.6997	10.7247	15.2746	10.3997	21.7745	20.1495	24.6994	22.7494
882	14.9496	19.4995	11.6997	10.3997	15.2746	10.0747	21.4495	19.8245	25.0244	23.7244
883	14.9496	19.1745	11.6997	10.3997	15.2746	10.3997	21.7745	19.8245	24.6994	22.4244
884	14.9496	19.8245	11.6997	10.3997	15.2746	10.0747	21.4495	20.1495	24.3744	22.7494
885	14.9496	19.4995	11.6997	10.3997	15.5996	10.3997	21.1245	19.8245	25.0244	23.0744
886	14.9496	19.8245	11.6997	10.3997	15.5996	10.3997	21.4495	20.1495	24.6994	23.3994
887	14.9496	19.4995	11.6997	10.3997	14.9496	10.0747	22.0994	19.8245	24.3744	22.4244
888	14.9496	19.4995	11.3747	10.3997	15.2746	10.3997	21.4495	19.8245	25.0244	23.0744
889	14.9496	20.1495	11.6997	10.3997	15.5996	10.0747	22.0994	20.1495	25.0244	23.0744
890	14.9496	19.8245	11.6997	10.3997	15.5996	10.0747	21.7745	19.8245	25.0244	22.7494
891	14.9496	19.4995	11.3747	10.3997	14.9496	10.0747	21.4495	19.8245	24.6994	23.7244
892	14.9496	19.4995	11.6997	10.3997	15.2746	10.0747	21.7745	20.1495	25.0244	22.4244
893	14.9496	19.4995	11.6997	10.3997	15.2746	10.0747	21.1245	19.8245	25.0244	23.0744
894	14.9496	20.1495	11.6997	10.7247	15.2746	10.3997	21.7745	19.8245	25.0244	22.7494
895	14.9496	19.4995	11.6997	10.3997	15.2746	10.3997	21.1245	19.8245	24.6994	22.7494
896	14.2996	19.4995	11.3747	10.3997	15.2746	10.3997	21.7745	20.1495	25.0244	22.7494
897	14.6246	20.1495	11.6997	10.3997	15.5996	10.3997	21.7745	20.1495	25.0244	23.0744
898	14.2996	19.8245	11.6997	10.0747	15.2746	10.0747	21.7745	20.1495	25.0244	23.0744
899	14.2996	19.4995	11.6997	10.0747	15.2746	10.3997	21.7745	20.1495	25.0244	23.0744
900	14.6246	19.8245	11.6997	10.0747	15.5996	10.3997	21.7745	20.1495	24.6994	23.0744
901	15.2746	19.8245	11.6997	10.3997	15.2746	10.3997	21.4495	20.1495	24.6994	22.7494
902	14.9496	20.1495	11.6997	10.3997	15.9246	10.3997	21.7745	20.1495	24.6994	22.7494
903	15.2746	19.8245	11.6997	10.3997	15.5996	10.0747	21.7745	20.1495	25.3494	22.4244
904	15.5996	19.8245	11.6997	10.0747	15.9246	10.3997	22.0994	20.1495	25.0244	22.7494
905	15.9246	19.4995	11.6997	10.0747	14.6246	10.7247	22.0994	20.1495	25.0244	23.0744
906	15.5996	19.8245	11.6997	10.0747	15.5996	10.0747	21.7745	20.1495	25.0244	23.0744
907	15.2746	19.4995	11.6997	10.3997	15.9246	10.3997	21.4495	19.8245	24.6994	22.4244
908	15.2746	19.8245	11.6997	10.3997	15.2746	10.3997	21.7745	20.1495	24.6994	22.0994
909	15.2746	19.4995	11.6997	10.0747	15.5996	10.3997	21.7745	20.1495	25.0244	22.4244
910	15.2746	19.8245	11.6997	10.3997	14.9496	10.3997	22.0994	20.1495	24.3744	22.4244
911	15.2746	19.4995	11.6997	10.0747	14.9496	10.3997	21.7745	20.1495	24.6994	22.7494
912	15.5996	19.4995	11.6997	10.3997	15.5996	10.3997	22.0994	20.1495	24.6994	22.7494
913	15.2746	20.1495	11.6997	10.0747	14.9496	10.3997	21.7745	20.1495	24.6994	21.7745
914	15.2746	19.8245	11.6997	10.3997	14.9496	10.3997	21.7745	20.1495	24.3744	22.7494
915	15.2746	19.1745	11.6997	10.3997	14.9496	10.3997	22.0994	20.1495	24.6994	23.3994
916	15.2746	19.8245	11.3747	10.0747	15.5996	10.3997	21.7745	20.1495	24.6994	22.7494
917	15.2746	19.8245	11.6997	10.3997	15.2746	10.3997	21.7745	19.8245	25.0244	23.0744
918	15.2746	19.8245	11.6997	10.3997	14.9496	10.0747	21.1245	19.8245	24.6994	22.0994
919	14.9496	19.8245	11.6997	9.74976	15.9246	10.3997	22.0994	20.1495	24.6994	23.0744
920	14.9496	19.4995	11.6997	10.3997	15.5996	10.3997	21.4495	20.1495	24.6994	22.0994
921	15.5996	19.4995	11.6997	10.3997	15.9246	10.3997	22.0994	19.8245	24.6994	23.0744
922	15.2746	19.4995	11.6997	10.0747	15.2746	10.3997	21.7745	19.8245	24.6994	23.3994
923	14.9496	19.4995	11.6997	10.3997	15.9246	10.3997	21.4495	20.1495	25.0244	22.7494
924	15.2746	19.8245	11.6997	10.0747	15.2746	10.3997	21.4495	19.8245	24.6994	22.7494
925	15.2746	19.8245	11.6997	10.0747	15.5996	10.0747	21.7745	20.1495	24.3744	23.0744
926	15.5996	19.8245	11.6997	10.3997	15.2746	10.3997	21.4495	19.8245	24.6994	23.0744
927	15.2746	19.8245	11.6997	10.3997	15.5996	10.0747	21.4495	19.8245	24.6994	22.7494
928	15.2746	19.8245	11.6997	10.0747	14.9496	10.3997	21.7745	19.8245	24.3744	22.7494
929	15.2746	19.4995	11.6997	10.0747	14.9496	10.7247	22.0994	19.8245	24.3744	22.4244
930	15.2746	19.8245	11.6997	10.0747	15.5996	10.3997	22.0994	20.1495	24.6994	22.4244
931	15.2746	19.4995	11.6997	10.3997	15.2746	10.3997	21.7745	20.1495	24.6994	22.4244
932	15.5996	19.4995	11.6997	10.3997	15.9246	10.0747	21.4495	20.1495	24.3744	23.0744
933	15.5996	19.8245	11.6997	10.0747	14.9496	10.7247	21.7745	20.1495	25.0244	23.3994
934	15.5996	19.4995	11.6997	10.0747	14.9496	10.0747	21.4495	20.1495	24.3744	23.3994
935	15.5996	19.4995	11.6997	10.0747	15.2746	10.3997	21.4495	19.8245	25.0244	23.3994
936	15.5996	19.8245	11.6997	10.0747	15.5996	10.0747	21.4495	20.1495	24.6994	23.0744
937	15.5996	20.1495	11.6997	10.3997	15.5996	10.0747	21.7745	20.1495	25.0244	23.0744
938	15.9246	19.8245	11.6997	9.74976	15.5996	10.3997	21.7745	19.8245	24.6994	23.0744
939	15.9246	20.1495	11.6997	10.0747	15.5996	10.0747	21.7745	20.1495	25.0244	23.3994
940	15.9246	19.4995	11.6997	10.3997	14.9496	10.3997	22.0994	19.8245	24.6994	23.0744
941	15.9246	19.8245	11.6997	10.3997	15.2746	10.3997	21.4495	19.4995	24.3744	22.7494
942	15.9246	19.8245	12.0247	10.0747	15.2746	10.3997	21.7745	19.8245	24.6994	23.0744
943	15.9246	19.8245	11.6997	10.3997	16.2496	10.0747	21.4495	19.8245	24.3744	22.4244
944	15.9246	20.4745	11.6997	10.7247	15.5996	10.0747	22.0994	19.8245	24.6994	23.0744
945	15.5996	19.8245	11.6997	10.7247	15.5996	10.3997	21.4495	20.1495	24.6994	22.4244
946	15.5996	19.8245	11.6997	10.0747	15.5996	10.0747	21.4495	19.8245	24.3744	22.7494
947	15.5996	19.8245	11.6997	10.0747	15.2746	10.3997	21.1245	20.1495	24.6994	22.7494
948	15.5996	20.1495	11.6997	10.3997	15.5996	10.3997	21.1245	19.8245	24.3744	23.0744
949	15.5996	19.4995	11.6997	10.7247	15.9246	10.3997	21.4495	20.1495	25.0244	22.4244
950	15.5996	20.1495	11.6997	10.3997	15.5996	10.3997	21.4495	19.8245	24.3744	22.7494
951	15.5996	19.8245	11.6997	10.3997	15.2746	10.3997	21.1245	20.1495	24.6994	23.0744
952	15.5996	19.8245	11.6997	10.7247	15.2746	10.0747	21.1245	19.8245	25.0244	21.7745
953	15.5996	19.8245	11.6997	9.42476	14.9496	10.0747	21.1245	19.8245	24.6994	23.0744
954	15.5996	19.4995	11.6997	10.0747	15.2746	10.7247	21.7745	19.8245	25.0244	22.7494
955	15.2746	19.4995	11.6997	10.0747	15.5996	10.3997	21.7745	20.1495	24.6994	23.3994
956	15.5996	19.8245	11.6997	10.0747	15.2746	10.0747	21.4495	19.8245	25.0244	22.4244
957	15.5996	19.8245	11.6997	10.0747	15.5996	10.3997	21.4495	19.8245	24.6994	23.0744
958	15.5996	20.1495	11.6997	10.0747	15.2746	10.0747	21.4495	20.1495	24.6994	23.0744
959	15.5996	19.4995	11.6997	10.0747	15.5996	10.0747	21.4495	19.8245	24.3744	23.3994
960	15.5996	19.8245	11.6997	9.74976	15.2746	10.7247	20.7995	19.4995	24.6994	22.7494
961	15.5996	19.8245	11.6997	10.0747	14.9496	10.3997	21.1245	19.8245	24.3744	22.0994
962	15.5996	19.8245	11.6997	10.3997	15.2746	10.3997	21.7745	19.8245	25.0244	22.7494
963	15.5996	19.8245	11.6997	10.0747	14.9496	10.0747	21.1245	19.8245	24.6994	22.0994
964	15.5996	19.4995	11.6997	9.74976	14.2996	10.3997	21.4495	19.8245	24.3744	22.4244
965	15.5996	20.1495	11.6997	10.0747	15.2746	10.0747	21.1245	20.1495	24.3744	22.4244
966	15.5996	19.8245	11.6997	10.0747	14.9496	10.0747	21.1245	19.8245	25.0244	22.0994
967	15.9246	19.8245	11.6997	10.0747	15.2746	10.3997	21.4495	19.8245	24.6994	22.4244
968	15.5996	19.8245	11.6997	10.0747	15.5996	10.7247	21.4495	19.8245	25.3494	23.0744
969	15.5996	19.8245	11.6997	10.0747	15.2746	10.0747	21.4495	19.8245	24.6994	22.4244
970	15.9246	19.8245	11.6997	10.3997	15.2746	10.3997	21.4495	20.1495	24.6994	22.7494
971	15.9246	20.1495	11.6997	10.3997	15.9246	10.0747	21.1245	20.1495	24.6994	23.0744
972	15.9246	20.1495	11.6997	11.3747	15.2746	10.3997	21.4495	20.1495	24.3744	23.0744
973	15.5996	19.8245	11.3747	11.3747	14.9496	10.3997	21.4495	20.1495	24.6994	23.3994
974	15.5996	19.8245	12.0247	10.3997	15.2746	10.3997	21.1245	20.1495	25.0244	23.0744
975	15.9246	20.1495	11.6997	10.0747	15.9246	10.0747	21.4495	19.8245	24.6994	22.4244
976	15.9246	20.1495	11.6997	10.0747	15.9246	10.3997	21.1245	19.8245	25.0244	23.7244
977	15.5996	20.1495	11.6997	10.7247	15.5996	10.3997	21.4495	20.1495	24.6994	23.0744
978	15.5996	19.8245	12.0247	11.6997	14.9496	10.3997	21.7745	20.1495	25.0244	22.0994
979	15.5996	19.8245	11.6997	12.0247	14.9496	10.3997	21.1245	20.1495	24.6994	22.4244
980	15.5996	19.4995	11.6997	11.0497	16.2496	10.3997	21.4495	19.8245	24.6994	22.7494
981	15.5996	20.1495	11.6997	11.0497	15.9246	10.7247	21.4495	19.8245	25.3494	23.0744
982	15.5996	19.8245	11.3747	11.0497	15.2746	10.0747	21.7745	19.8245	25.0244	23.3994
983	15.5996	20.1495	11.6997	11.0497	15.2746	10.3997	21.4495	20.1495	24.6994	23.0744
984	15.5996	19.8245	11.6997	11.0497	15.2746	10.7247	21.4495	19.8245	24.6994	22.7494
985	15.5996	20.1495	11.6997	11.0497	15.2746	10.3997	20.7995	19.8245	24.6994	22.7494
986	15.5996	20.1495	11.6997	11.0497	14.9496	10.7247	21.4495	20.1495	25.0244	23.0744
987	15.5996	20.1495	11.6997	11.0497	15.5996	10.3997	21.1245	19.8245	24.6994	22.4244
988	15.2746	20.1495	11.6997	11.0497	15.2746	10.3997	22.0994	19.8245	25.0244	23.0744
989	15.5996	20.1495	11.6997	11.3747	15.2746	10.3997	21.1245	20.1495	25.0244	23.3994
990	15.5996	20.4745	11.6997	11.0497	14.9496	10.0747	21.4495	19.4995	25.3494	23.3994
991	15.2746	20.1495	12.0247	11.0497	15.2746	10.0747	21.4495	20.1495	25.0244	22.7494
992	15.2746	20.1495	11.3747	11.0497	14.9496	10.0747	21.4495	20.1495	25.0244	23.0744
993	15.2746	20.1495	11.6997	11.0497	14.9496	10.3997	21.4495	20.1495	25.0244	22.7494
994	15.2746	20.4745	11.6997	11.0497	14.9496	10.3997	21.1245	19.8245	25.0244	22.7494
995	15.2746	19.8245	11.6997	11.3747	14.9496	10.3997	21.1245	20.1495	25.0244	22.7494
996	15.2746	20.1495	11.6997	11.3747	14.9496	10.3997	21.4495	20.1495	24.6994	22.7494
997	15.2746	20.1495	11.3747	11.0497	15.2746	10.3997	21.4495	19.8245	25.0244	22.7494
998	15.2746	19.8245	11.6997	11.3747	15.2746	10.0747	21.4495	19.8245	25.0244	22.7494
999	15.2746	20.4745	11.6997	11.0497	15.2746	10.0747	21.4495	20.4745	24.6994	22.4244
1000	15.5996	20.1495	11.6997	11.0497	14.9496	10.3997	21.1245	19.8245	24.3744	23.0744
1001	15.5996	20.4745	11.6997	11.3747	15.9246	10.0747	21.4495	19.8245	24.6994	22.7494
1002	15.5996	20.4745	11.6997	11.0497	15.5996	10.3997	21.7745	19.8245	24.6994	22.7494
1003	15.9246	19.4995	11.6997	11.0497	16.2496	10.3997	21.1245	20.1495	25.0244	23.0744
1004	15.9246	20.4745	12.0247	10.7247	14.9496	10.3997	21.7745	20.1495	25.0244	22.7494
1005	16.2496	19.8245	12.0247	11.3747	15.5996	10.0747	21.7745	19.8245	25.0244	22.7494
1006	15.5996	19.8245	11.6997	11.3747	15.2746	10.3997	21.4495	19.8245	25.0244	22.0994
1007	15.5996	20.1495	11.3747	11.3747	14.6246	10.3997	21.7745	20.1495	25.0244	23.0744
1008	15.5996	20.1495	11.6997	11.3747	15.2746	10.0747	21.7745	19.8245	24.6994	22.0994
1009	15.5996	19.8245	11.6997	11.0497	15.2746	10.7247	21.1245	19.8245	25.0244	22.7494
1010	15.5996	20.1495	11.6997	10.7247	15.2746	10.3997	21.4495	20.1495	25.0244	22.7494
1011	15.9246	20.1495	11.6997	11.0497	15.5996	10.3997	21.1245	19.8245	24.6994	22.0994
1012	15.5996	20.1495	12.0247	11.0497	15.2746	10.3997	21.1245	19.8245	24.6994	23.0744
1013	15.5996	20.4745	12.0247	11.0497	15.2746	10.7247	21.1245	20.1495	25.0244	22.7494
1014	15.9246	19.8245	11.6997	11.0497	15.5996	10.3997	21.7745	20.1495	24.6994	22.7494
1015	15.9246	20.4745	11.6997	11.0497	16.2496	10.0747	21.1245	20.1495	25.0244	23.0744
1016	15.5996	20.4745	11.6997	11.3747	15.5996	10.3997	21.7745	20.1495	25.0244	23.0744
1017	15.5996	19.8245	11.6997	11.3747	14.9496	10.3997	21.4495	19.8245	25.0244	22.7494
1018	15.2746	19.8245	11.6997	11.0497	15.9246	10.0747	20.7995	20.1495	25.0244	22.7494
1019	15.2746	19.4995	11.6997	11.3747	15.2746	10.3997	21.1245	20.1495	24.6994	23.0744
1020	15.2746	19.8245	12.0247	11.0497	15.2746	10.3997	21.7745	20.1495	25.0244	22.7494
1021	15.5996	19.4995	11.6997	11.0497	15.2746	10.0747	20.7995	20.1495	24.6994	22.4244
1022	15.5996	20.1495	11.6997	11.0497	15.5996	10.3997	21.4495	19.8245	24.6994	22.7494
1023	15.5996	19.8245	11.6997	11.0497	14.6246	10.0747	21.1245	20.1495	24.6994	22.7494
1024	15.5996	19.8245	11.6997	11.0497	15.2746	10.3997	21.7745	20.1495	24.6994	23.0744
1025	15.5996	19.1745	11.6997	11.0497	15.5996	10.3997	21.1245	20.1495	24.6994	23.0744
1026	15.9246	19.8245	11.3747	11.0497	15.9246	10.3997	21.4495	20.1495	24.3744	22.7494
1027	15.5996	19.8245	11.6997	11.0497	14.9496	10.7247	21.1245	20.1495	25.0244	22.7494
1028	15.9246	19.8245	11.6997	11.0497	14.9496	10.3997	20.7995	19.8245	25.0244	22.4244
1029	15.5996	19.4995	11.6997	11.3747	15.5996	10.0747	21.1245	20.1495	25.0244	22.7494
1030	15.9246	19.8245	11.3747	11.0497	14.9496	10.3997	20.4745	20.1495	24.6994	22.4244
1031	15.5996	20.1495	11.6997	10.7247	15.2746	10.3997	21.4495	20.1495	24.3744	23.0744
1032	15.5996	20.1495	11.6997	10.7247	15.5996	10.3997	21.7745	20.1495	24.3744	22.7494
1033	15.5996	20.1495	11.3747	10.7247	15.2746	10.0747	21.4495	19.8245	24.6994	22.7494
1034	15.5996	20.1495	11.6997	10.7247	15.2746	10.0747	21.4495	19.8245	24.3744	22.7494
1035	15.5996	20.1495	11.3747	11.0497	15.2746	10.3997	21.4495	20.1495	25.0244	22.7494
1036	15.5996	20.1495	11.3747	11.0497	15.5996	10.3997	21.4495	20.1495	24.6994	23.0744
1037	15.5996	19.8245	11.3747	10.7247	15.9246	10.3997	21.4495	20.1495	24.3744	22.4244
1038	15.5996	20.4745	11.6997	10.7247	15.5996	10.0747	21.1245	20.1495	24.6994	23.3994
1039	15.5996	20.4745	11.6997	11.0497	14.6246	10.3997	21.4495	20.1495	24.3744	22.7494
1040	15.5996	20.1495	11.3747	11.0497	15.5996	10.0747	21.7745	19.8245	25.0244	23.3994
1041	15.5996	20.4745	11.6997	10.7247	15.2746	10.0747	21.7745	19.8245	24.3744	22.4244
1042	15.5996	19.8245	11.6997	11.0497	15.2746	10.3997	21.1245	20.1495	24.6994	22.7494
1043	15.2746	20.1495	11.6997	10.7247	15.5996	10.3997	21.4495	20.1495	24.6994	22.7494
1044	15.2746	20.1495	11.6997	10.7247	15.5996	10.3997	21.7745	20.1495	25.0244	22.7494
1045	15.2746	20.4745	11.6997	11.0497	15.2746	10.3997	21.4495	20.1495	24.3744	23.0744
1046	15.2746	20.4745	11.3747	11.0497	15.5996	10.3997	21.4495	20.1495	24.6994	22.7494
1047	15.5996	20.1495	11.6997	11.0497	15.2746	10.3997	21.7745	19.8245	24.3744	22.7494
1048	15.2746	20.1495	11.6997	11.0497	15.5996	10.0747	22.0994	19.8245	24.6994	22.7494
1049	15.2746	19.8245	11.6997	10.7247	15.2746	10.3997	21.4495	20.1495	24.3744	23.0744
1050	15.2746	20.4745	11.6997	10.7247	14.9496	10.0747	21.4495	20.1495	24.3744	23.3994
1051	15.2746	19.8245	12.0247	11.0497	14.9496	10.3997	21.1245	20.1495	24.6994	23.3994
1052	15.2746	20.1495	11.6997	10.7247	15.5996	10.0747	21.7745	20.1495	24.6994	23.0744
1053	15.2746	19.8245	12.0247	11.0497	15.2746	10.7247	21.7745	19.8245	24.0494	22.7494
1054	15.2746	20.1495	11.6997	10.7247	14.9496	10.3997	21.1245	20.1495	24.3744	22.0994
1055	15.2746	20.1495	11.3747	10.7247	14.9496	10.0747	21.4495	20.1495	24.3744	22.0994
1056	15.2746	20.1495	11.6997	11.0497	14.9496	10.3997	21.1245	20.1495	24.0494	22.7494
1057	15.2746	19.8245	11.6997	11.0497	15.2746	10.3997	21.4495	20.1495	24.3744	22.7494
1058	15.2746	20.1495	11.6997	11.0497	15.2746	10.3997	21.4495	19.8245	24.3744	22.7494
1059	15.2746	20.1495	11.6997	11.0497	15.2746	10.3997	22.0994	20.1495	24.3744	23.0744
1060	15.2746	20.1495	11.6997	11.0497	14.9496	10.3997	20.7995	20.1495	24.3744	22.7494
1061	15.2746	20.4745	11.6997	10.7247	15.5996	10.3997	21.4495	20.1495	24.3744	22.0994
1062	15.5996	20.4745	11.6997	11.0497	15.9246	10.3997	21.7745	20.1495	24.3744	23.3994
1063	15.5996	20.4745	11.3747	11.0497	15.5996	10.3997	21.7745	20.1495	24.3744	22.4244
1064	15.2746	20.1495	11.6997	11.0497	15.9246	10.0747	21.7745	20.1495	25.0244	23.3994
1065	15.5996	20.7995	11.6997	11.0497	15.5996	10.3997	21.4495	20.1495	24.3744	23.0744
1066	15.2746	20.1495	11.3747	11.0497	14.9496	10.3997	21.7745	19.8245	24.6994	22.7494
1067	15.5996	19.8245	11.3747	11.0497	15.5996	10.3997	21.4495	20.1495	24.3744	22.7494
1068	15.2746	20.4745	11.6997	11.0497	15.2746	10.0747	21.7745	19.8245	24.3744	23.0744
1069	15.5996	20.4745	11.6997	11.0497	15.5996	10.3997	21.4495	19.8245	24.3744	22.7494
1070	15.2746	19.8245	11.6997	11.0497	15.9246	10.3997	21.1245	20.1495	24.6994	21.7745
1071	15.5996	20.1495	11.6997	11.0497	15.2746	10.0747	20.7995	20.1495	24.3744	23.0744
1072	15.5996	20.4745	11.6997	11.0497	15.2746	10.3997	20.7995	20.1495	24.3744	22.7494
1073	15.5996	20.4745	11.6997	10.7247	15.5996	10.3997	21.4495	20.1495	24.6994	23.0744
1074	15.5996	19.8245	11.3747	10.7247	15.2746	10.3997	21.1245	20.1495	24.0494	23.7244
1075	15.5996	20.1495	11.3747	11.0497	15.5996	10.3997	21.4495	20.1495	24.3744	22.4244
1076	15.2746	19.8245	11.6997	11.0497	15.5996	10.3997	21.7745	20.1495	24.6994	23.0744
1077	15.5996	20.1495	11.3747	11.0497	15.2746	10.3997	21.1245	20.1495	24.6994	22.7494
1078	15.5996	20.4745	11.6997	10.7247	15.2746	10.3997	21.4495	20.1495	24.0494	22.7494
1079	15.5996	20.1495	11.6997	11.0497	15.2746	10.3997	20.7995	20.1495	24.6994	23.3994
1080	15.9246	20.1495	11.6997	11.0497	15.5996	10.3997	21.1245	20.1495	24.0494	22.7494
1081	15.9246	20.1495	11.3747	11.0497	14.9496	10.3997	21.1245	20.1495	24.0494	23.3994
1082	15.5996	20.1495	11.6997	11.0497	15.5996	10.3997	20.7995	20.1495	24.6994	22.7494
1083	15.9246	20.4745	11.3747	11.0497	14.9496	10.3997	21.7745	20.1495	24.0494	22.7494
1084	15.5996	20.4745	11.6997	11.0497	15.5996	10.3997	21.4495	20.1495	24.3744	22.4244
1085	15.2746	20.1495	11.6997	11.0497	15.9246	10.3997	21.1245	20.1495	24.6994	23.0744
1086	15.5996	20.4745	11.6997	11.0497	15.5996	10.3997	21.4495	20.1495	24.0494	23.3994
1087	15.9246	20.1495	11.6997	10.7247	15.5996	10.3997	21.1245	20.1495	24.3744	23.0744
1088	15.9246	20.1495	11.3747	10.7247	15.2746	10.3997	21.1245	20.1495	24.6994	23.7244
1089	15.9246	20.4745	11.6997	10.7247	14.6246	10.3997	21.4495	20.1495	24.3744	22.7494
1090	15.2746	20.4745	11.6997	10.7247	15.2746	10.3997	21.4495	20.1495	24.3744	22.4244
1091	15.2746	20.1495	11.6997	11.0497	15.9246	10.3997	21.1245	20.1495	24.3744	23.0744
1092	15.2746	20.4745	11.3747	11.0497	15.5996	10.3997	21.4495	20.1495	24.6994	23.0744
1093	15.5996	20.1495	11.6997	11.0497	15.5996	10.3997	21.1245	20.1495	24.6994	22.7494
1094	15.2746	20.1495	11.3747	11.0497	15.9246	10.0747	21.7745	19.8245	24.3744	22.7494
1095	15.5996	20.4745	11.3747	11.0497	15.5996	10.0747	21.1245	20.1495	24.6994	22.7494
1096	15.5996	20.4745	11.3747	10.7247	15.2746	10.0747	21.1245	20.1495	24.6994	23.0744
1097	15.5996	20.4745	11.6997	11.0497	15.5996	10.3997	21.4495	20.1495	24.3744	23.0744
1098	15.9246	19.8245	11.6997	11.0497	15.2746	10.0747	21.7745	20.1495	24.3744	22.4244
1099	15.5996	20.1495	11.6997	11.0497	15.2746	10.3997	21.7745	20.1495	24.3744	23.0744
1100	15.9246	20.4745	11.3747	11.0497	15.5996	10.3997	20.7995	19.8245	24.6994	23.0744
1101	15.9246	20.1495	11.6997	10.7247	15.5996	10.0747	21.1245	20.1495	24.0494	23.3994
1102	15.5996	20.1495	11.6997	10.7247	15.5996	10.3997	21.4495	20.1495	23.7244	22.4244
1103	15.5996	20.4745	11.3747	10.7247	15.5996	10.0747	21.4495	20.1495	24.3744	23.0744
1104	15.9246	20.1495	11.6997	10.7247	15.2746	10.0747	21.4495	20.1495	24.3744	22.7494
1105	15.9246	20.1495	12.0247	10.7247	15.5996	10.0747	21.7745	20.1495	24.3744	22.7494
1106	15.5996	19.8245	11.6997	11.0497	15.2746	10.0747	21.1245	20.1495	24.3744	23.0744
1107	15.5996	19.4995	11.3747	10.7247	15.5996	10.3997	21.7745	20.1495	24.6994	23.0744
1108	15.5996	20.1495	11.6997	10.7247	14.9496	10.3997	21.4495	20.1495	24.3744	23.3994
1109	15.5996	19.8245	12.0247	10.7247	15.2746	10.0747	21.4495	19.8245	24.6994	22.4244
1110	15.5996	20.1495	11.3747	10.7247	15.9246	10.3997	21.1245	19.8245	24.0494	23.0744
1111	15.5996	19.8245	12.0247	10.7247	15.9246	10.3997	21.1245	20.1495	24.0494	22.7494
1112	15.5996	20.1495	11.6997	10.7247	15.5996	10.7247	21.4495	19.8245	23.7244	22.4244
1113	15.5996	20.4745	12.0247	10.7247	14.9496	10.0747	21.1245	19.8245	24.3744	23.0744
1114	15.2746	20.1495	11.6997	10.7247	15.2746	10.0747	21.7745	20.1495	24.3744	23.0744
1115	15.2746	20.1495	11.6997	11.0497	15.5996	10.3997	21.1245	20.1495	24.0494	23.3994
1116	15.2746	20.1495	11.3747	10.7247	15.9246	10.3997	21.7745	20.1495	24.3744	23.0744
1117	14.9496	20.1495	11.6997	11.0497	14.9496	10.3997	21.1245	20.1495	24.6994	22.7494
1118	15.2746	19.8245	12.0247	10.7247	15.5996	10.3997	21.7745	20.1495	24.3744	23.3994
1119	15.2746	20.7995	12.0247	11.0497	14.9496	10.7247	21.7745	19.8245	24.0494	22.7494
1120	15.5996	20.4745	11.6997	11.0497	15.9246	10.3997	21.1245	20.1495	24.0494	22.7494
1121	15.2746	20.1495	11.6997	10.7247	15.5996	10.0747	21.4495	20.1495	24.0494	22.4244
1122	15.5996	20.1495	11.6997	11.0497	14.9496	10.3997	21.1245	20.1495	24.3744	22.7494
1123	15.2746	20.1495	12.0247	10.7247	15.2746	10.3997	21.4495	20.1495	24.0494	23.0744
1124	15.2746	20.1495	11.6997	10.7247	15.2746	10.3997	21.4495	19.8245	25.0244	23.0744
1125	15.5996	20.1495	12.0247	10.7247	15.2746	10.3997	21.4495	20.1495	24.3744	22.4244
1126	15.2746	19.8245	11.6997	11.0497	15.2746	10.3997	21.4495	20.1495	24.3744	23.0744
1127	15.2746	20.1495	11.6997	11.0497	15.2746	10.3997	20.7995	20.1495	24.6994	23.3994
1128	15.2746	20.1495	11.6997	10.7247	15.9246	10.0747	21.1245	20.1495	24.3744	23.0744
1129	15.2746	19.8245	11.6997	11.0497	15.2746	10.0747	20.7995	20.1495	24.3744	22.7494
1130	15.2746	20.1495	11.6997	10.7247	14.9496	10.0747	21.1245	20.1495	24.3744	23.0744
1131	15.2746	20.1495	11.6997	10.7247	15.5996	10.3997	21.7745	20.1495	24.0494	23.3994
1132	15.5996	19.8245	11.6997	10.7247	15.5996	10.3997	20.7995	20.1495	24.3744	22.7494
1133	15.2746	20.1495	12.0247	10.7247	14.9496	10.3997	21.1245	20.1495	24.0494	22.4244
1134	15.2746	19.8245	11.6997	10.7247	15.2746	10.3997	21.1245	19.8245	24.0494	22.7494
1135	14.9496	19.8245	11.6997	10.7247	15.5996	10.0747	21.1245	20.1495	24.0494	22.7494
1136	15.2746	19.8245	11.6997	10.7247	15.9246	10.0747	21.7745	20.1495	24.3744	23.0744
1137	14.9496	20.1495	11.6997	11.0497	15.2746	10.0747	21.4495	20.1495	24.3744	23.0744
1138	14.9496	20.1495	12.0247	11.0497	15.2746	10.3997	21.4495	19.8245	24.3744	23.3994
1139	14.9496	20.1495	11.6997	11.0497	15.2746	10.3997	21.4495	20.1495	24.3744	22.7494
1140	14.9496	19.4995	11.6997	11.0497	15.5996	10.3997	21.4495	20.1495	24.6994	23.0744
1141	15.2746	20.1495	11.6997	10.7247	14.9496	10.3997	21.4495	20.1495	24.3744	23.3994
1142	15.5996	20.4745	11.6997	11.0497	15.2746	10.7247	21.1245	20.1495	24.0494	23.0744
1143	15.2746	20.1495	11.6997	11.0497	14.9496	10.3997	21.1245	20.1495	24.0494	23.0744
1144	15.2746	19.4995	11.6997	10.7247	15.2746	10.0747	21.4495	19.8245	25.3494	23.7244
1145	15.2746	19.8245	11.6997	11.0497	14.9496	10.3997	21.7745	20.1495	25.0244	22.7494
1146	15.2746	19.8245	11.6997	10.7247	15.2746	10.0747	21.1245	19.8245	24.3744	23.7244
1147	15.2746	20.1495	12.0247	11.0497	15.2746	10.3997	21.4495	19.8245	25.0244	23.3994
1148	15.2746	20.4745	12.0247	10.7247	15.5996	10.3997	21.1245	19.8245	24.0494	23.0744
1149	15.2746	19.8245	11.6997	10.7247	15.5996	10.3997	21.1245	20.1495	24.0494	22.7494
1150	15.2746	19.8245	12.0247	10.7247	15.2746	10.7247	21.4495	20.1495	24.3744	23.3994
1151	15.2746	19.8245	11.6997	10.7247	15.2746	10.3997	21.4495	20.1495	25.0244	23.0744
1152	15.2746	19.8245	11.6997	10.7247	15.2746	10.0747	21.1245	20.1495	24.6994	23.3994
1153	15.2746	19.8245	11.6997	10.7247	15.2746	10.0747	21.4495	20.1495	24.3744	22.7494
1154	15.2746	20.1495	11.6997	10.7247	14.9496	10.3997	21.4495	19.8245	24.3744	22.7494
1155	15.2746	19.8245	11.6997	10.7247	15.5996	10.3997	21.7745	19.8245	24.3744	22.7494
1156	15.2746	19.8245	12.0247	10.7247	14.9496	10.3997	21.1245	19.8245	24.3744	22.4244
1157	15.2746	19.4995	11.6997	10.7247	15.5996	10.3997	21.7745	19.8245	24.6994	23.0744
1158	15.2746	19.4995	12.0247	10.7247	14.9496	10.3997	21.4495	20.1495	24.3744	22.7494
1159	15.2746	19.8245	11.6997	10.7247	15.2746	10.0747	21.7745	20.1495	24.3744	22.7494
1160	15.2746	20.1495	11.6997	10.7247	15.2746	10.3997	21.1245	19.8245	24.3744	22.7494
1161	15.2746	20.1495	11.6997	10.7247	15.2746	10.3997	21.4495	19.8245	24.3744	23.0744
1162	15.2746	19.8245	11.3747	10.7247	15.5996	10.0747	21.4495	20.1495	24.3744	23.0744
1163	15.2746	19.8245	11.6997	10.7247	15.2746	10.3997	21.1245	20.1495	24.6994	23.3994
1164	15.2746	20.4745	12.0247	11.0497	15.2746	10.3997	21.4495	19.8245	24.6994	23.3994
1165	15.2746	20.4745	11.6997	11.0497	15.5996	10.3997	21.7745	20.1495	24.0494	23.0744
1166	15.2746	20.1495	11.6997	10.7247	15.5996	10.3997	20.7995	20.1495	24.0494	23.3994
1167	15.2746	19.4995	11.6997	10.7247	15.9246	10.3997	21.1245	19.8245	24.6994	23.7244
1168	14.9496	20.4745	11.6997	10.7247	15.2746	10.3997	21.7745	20.1495	24.0494	23.0744
1169	15.2746	19.4995	11.6997	10.7247	15.2746	10.7247	21.4495	20.1495	24.6994	23.0744
1170	15.2746	20.1495	11.6997	10.7247	15.2746	10.7247	21.7745	20.1495	24.6994	23.3994
1171	15.2746	19.8245	12.0247	10.7247	15.5996	10.3997	21.4495	20.1495	24.6994	23.3994
1172	15.2746	19.8245	12.0247	11.0497	15.2746	10.7247	21.1245	20.1495	24.6994	23.0744
1173	15.2746	20.1495	12.0247	10.7247	15.2746	10.7247	21.4495	19.8245	24.6994	23.0744
1174	15.2746	20.1495	12.0247	11.0497	15.2746	10.3997	21.1245	20.1495	24.0494	23.0744
1175	15.2746	20.1495	12.0247	10.7247	15.2746	10.3997	21.1245	19.8245	24.0494	23.0744
1176	15.2746	20.1495	12.0247	11.0497	15.2746	10.0747	21.1245	20.1495	24.0494	23.0744
1177	15.2746	19.8245	12.0247	10.7247	15.2746	10.7247	21.7745	19.8245	24.0494	23.0744
1178	15.2746	20.1495	12.0247	10.7247	15.5996	10.0747	20.7995	19.8245	25.3494	23.3994
1179	15.2746	20.1495	12.0247	10.7247	14.9496	10.3997	21.1245	19.8245	24.3744	23.0744
1180	15.2746	20.1495	12.0247	11.0497	14.9496	10.3997	21.4495	19.8245	24.3744	23.7244
1181	15.2746	19.4995	12.0247	10.7247	15.2746	10.3997	21.4495	20.1495	24.3744	22.7494
1182	15.2746	20.1495	12.0247	10.7247	15.2746	10.0747	21.7745	20.1495	24.0494	22.7494
1183	15.2746	19.8245	12.0247	11.0497	15.2746	10.3997	20.7995	19.8245	24.3744	22.7494
1184	15.2746	19.8245	12.0247	10.7247	15.2746	10.3997	22.0994	19.8245	25.0244	23.3994
1185	15.2746	20.4745	11.6997	11.0497	14.9496	10.3997	21.4495	19.8245	25.0244	23.3994
1186	15.2746	19.8245	12.0247	10.7247	15.2746	10.3997	21.1245	19.8245	24.3744	23.0744
1187	15.2746	19.8245	12.0247	10.7247	15.2746	10.3997	21.4495	19.8245	24.6994	23.0744
1188	15.2746	19.8245	12.0247	10.7247	15.2746	10.7247	21.4495	19.8245	24.3744	23.0744
1189	15.2746	20.1495	11.6997	10.7247	14.9496	10.3997	21.1245	19.8245	24.3744	23.0744
1190	14.9496	19.8245	12.0247	10.7247	15.2746	10.3997	21.1245	19.8245	24.6994	23.0744
1191	15.2746	19.8245	12.0247	10.7247	15.5996	10.3997	21.1245	19.8245	24.3744	22.7494
1192	15.2746	20.4745	11.6997	10.7247	15.2746	10.3997	21.1245	19.8245	24.3744	23.3994
1193	15.2746	20.1495	11.6997	10.7247	15.5996	10.7247	21.4495	19.8245	24.6994	22.7494
1194	15.2746	20.1495	11.6997	10.7247	15.5996	10.3997	21.7745	19.8245	24.6994	23.0744
1195	15.2746	19.8245	12.0247	10.7247	15.5996	10.3997	20.7995	20.1495	24.6994	23.3994
1196	15.2746	20.1495	12.0247	10.7247	15.2746	10.3997	22.0994	20.1495	24.3744	23.0744
1197	15.2746	20.1495	11.6997	10.7247	15.2746	10.7247	21.7745	20.1495	24.0494	23.7244
1198	14.9496	20.4745	12.0247	10.7247	15.2746	10.3997	21.4495	20.1495	24.3744	22.7494
1199	15.2746	20.1495	12.0247	10.7247	14.9496	10.3997	21.4495	20.1495	24.3744	22.7494
1200	14.9496	20.1495	12.0247	10.7247	15.5996	10.3997	21.4495	20.1495	25.0244	22.7494
1201	14.9496	20.1495	12.0247	10.7247	15.2746	10.3997	21.1245	20.1495	24.3744	23.3994
1202	15.2746	20.1495	12.0247	10.7247	16.2496	10.3997	21.1245	19.8245	25.0244	23.0744
1203	14.9496	20.1495	12.0247	10.7247	15.5996	10.3997	21.4495	19.8245	24.6994	23.3994
1204	14.9496	20.4745	12.0247	10.7247	15.5996	10.3997	21.4495	20.1495	24.3744	22.7494
1205	14.9496	20.1495	11.6997	10.7247	15.5996	10.3997	21.1245	20.1495	24.3744	23.0744
1206	15.2746	20.1495	12.0247	10.7247	15.5996	10.3997	21.4495	19.8245	25.0244	23.0744
1207	15.5996	20.1495	11.6997	10.7247	15.5996	10.3997	21.4495	20.1495	24.6994	23.0744
1208	15.9246	19.8245	12.0247	10.7247	15.5996	10.3997	21.1245	19.8245	24.3744	23.0744
1209	16.2496	19.8245	12.0247	10.7247	15.5996	10.3997	21.7745	20.1495	24.6994	23.3994
1210	16.2496	20.1495	12.0247	10.7247	15.5996	10.3997	21.1245	20.1495	25.0244	23.3994
1211	14.6246	19.8245	12.0247	10.7247	15.2746	10.3997	21.7745	20.1495	24.3744	23.0744
1212	14.9496	20.1495	12.0247	10.7247	14.9496	10.3997	21.7745	20.1495	24.3744	23.0744
1213	14.6246	20.1495	12.0247	10.3997	15.5996	10.0747	21.7745	20.1495	24.3744	23.0744
1214	14.6246	19.4995	12.0247	10.7247	15.5996	10.3997	21.4495	19.8245	24.6994	23.0744
1215	14.2996	19.4995	12.0247	10.7247	14.9496	10.3997	21.1245	19.8245	25.0244	23.3994
1216	14.6246	20.4745	12.0247	10.7247	15.2746	10.3997	21.7745	19.8245	25.0244	22.7494
1217	14.9496	20.1495	12.0247	10.7247	15.5996	10.0747	21.4495	19.8245	24.3744	22.7494
1218	14.9496	20.1495	12.0247	10.7247	15.9246	10.3997	21.4495	20.1495	24.3744	23.0744
1219	14.6246	19.8245	12.0247	11.3747	15.9246	10.3997	21.7745	19.8245	24.3744	23.0744
1220	14.6246	20.1495	12.0247	12.0247	15.5996	10.3997	21.7745	20.1495	24.3744	23.7244
1221	14.6246	20.1495	11.6997	11.3747	15.5996	10.3997	22.0994	19.8245	24.6994	23.0744
1222	14.6246	20.1495	12.0247	11.6997	15.5996	10.3997	21.4495	20.1495	24.6994	23.0744
1223	14.6246	19.8245	11.6997	11.3747	14.9496	10.3997	21.7745	20.1495	24.6994	23.0744
1224	14.6246	19.8245	12.0247	12.0247	15.5996	10.7247	21.4495	19.8245	24.3744	23.3994
1225	14.6246	19.8245	12.0247	11.6997	15.5996	10.0747	21.4495	19.8245	24.6994	23.0744
1226	14.9496	19.8245	12.0247	11.3747	15.9246	10.3997	20.7995	20.1495	24.6994	23.0744
1227	14.9496	20.1495	12.0247	11.6997	15.2746	10.0747	21.7745	19.8245	24.3744	23.0744
1228	14.9496	20.1495	11.6997	11.6997	15.5996	10.3997	20.7995	19.8245	24.6994	23.3994
1229	14.9496	19.8245	12.0247	11.3747	15.2746	10.3997	21.1245	20.1495	24.6994	23.7244
1230	14.6246	20.1495	11.6997	11.6997	15.2746	10.3997	21.1245	20.1495	24.6994	23.0744
1231	14.6246	19.8245	11.6997	11.6997	15.5996	10.3997	21.4495	20.1495	24.3744	23.0744
1232	14.6246	19.8245	11.6997	11.3747	15.9246	10.3997	21.1245	20.1495	24.3744	23.3994
1233	14.6246	19.8245	11.6997	11.6997	15.2746	10.3997	21.4495	20.1495	24.3744	22.7494
1234	14.6246	19.8245	11.6997	11.3747	15.5996	10.3997	20.7995	20.1495	24.3744	23.3994
1235	14.2996	19.8245	12.0247	11.6997	15.9246	10.3997	21.1245	19.8245	24.6994	22.7494
1236	14.6246	19.8245	11.6997	11.3747	15.2746	10.3997	21.4495	20.1495	24.3744	23.3994
1237	14.9496	19.8245	12.0247	11.6997	15.2746	10.3997	21.4495	20.1495	24.3744	23.0744
1238	14.9496	19.8245	11.3747	11.3747	15.5996	10.7247	21.4495	20.1495	24.3744	23.3994
1239	14.9496	19.4995	11.6997	11.6997	15.5996	10.3997	21.1245	19.8245	24.6994	23.3994
1240	14.6246	19.8245	12.0247	11.3747	15.9246	10.3997	21.4495	20.1495	24.0494	22.7494
1241	14.9496	20.1495	12.0247	11.3747	15.2746	10.3997	21.1245	20.1495	24.6994	23.3994
1242	14.6246	19.8245	11.6997	11.3747	15.5996	10.0747	21.4495	20.1495	24.6994	23.0744
1243	14.6246	19.4995	12.0247	11.3747	15.5996	10.3997	21.4495	19.8245	24.3744	23.3994
1244	14.6246	19.8245	11.6997	11.6997	15.5996	10.3997	21.4495	20.1495	24.3744	23.3994
1245	14.9496	19.4995	12.0247	11.3747	15.9246	10.3997	21.1245	19.8245	25.0244	23.3994
1246	14.6246	19.8245	11.6997	11.3747	15.5996	10.3997	21.4495	19.8245	24.6994	23.0744
1247	14.6246	20.1495	11.6997	11.3747	15.5996	10.0747	21.4495	20.1495	24.6994	23.0744
1248	14.9496	20.1495	12.0247	11.3747	15.9246	10.3997	21.4495	19.8245	24.6994	23.3994
1249	14.9496	19.8245	12.0247	11.3747	16.2496	10.3997	21.1245	19.8245	24.3744	23.7244
1250	14.9496	20.1495	12.0247	11.3747	15.2746	10.3997	21.4495	19.8245	24.3744	23.0744
1251	14.9496	20.1495	12.0247	11.3747	15.9246	10.0747	21.1245	19.8245	24.6994	23.7244
1252	14.9496	20.1495	12.0247	11.6997	15.2746	10.7247	21.1245	19.8245	24.6994	23.7244
1253	14.9496	20.1495	12.0247	11.3747	15.9246	10.3997	21.4495	19.8245	24.3744	23.3994
1254	14.9496	20.4745	12.0247	11.3747	15.5996	10.3997	21.1245	19.8245	24.3744	23.3994
1255	14.9496	20.1495	12.0247	11.6997	16.2496	10.3997	21.1245	19.8245	24.6994	23.0744
1256	14.9496	19.8245	12.0247	11.3747	15.9246	10.3997	21.7745	20.1495	24.3744	23.7244
1257	14.9496	19.8245	12.0247	11.3747	15.2746	10.3997	21.1245	19.8245	24.3744	23.3994
1258	14.9496	19.8245	12.0247	11.3747	15.9246	10.3997	21.4495	20.1495	24.3744	23.3994
1259	14.6246	20.1495	12.0247	11.3747	15.5996	10.3997	21.4495	20.1495	24.3744	23.0744
1260	14.9496	19.8245	12.0247	11.3747	15.5996	10.3997	21.1245	19.8245	24.6994	23.7244
1261	14.9496	19.8245	11.6997	11.6997	15.5996	10.3997	21.1245	19.8245	24.6994	23.7244
1262	14.9496	19.8245	12.0247	11.3747	15.2746	10.3997	21.7745	19.8245	24.6994	23.0744
1263	14.9496	20.1495	12.0247	11.3747	15.9246	10.3997	21.7745	19.8245	24.3744	23.0744
1264	14.9496	19.8245	11.6997	11.3747	15.2746	10.3997	21.1245	19.8245	25.3494	23.3994
1265	14.9496	19.8245	11.6997	11.3747	15.9246	10.3997	21.1245	19.8245	24.3744	23.3994
1266	14.9496	19.8245	12.0247	11.0497	16.2496	10.3997	21.1245	19.8245	24.6994	23.3994
1267	14.9496	20.1495	12.0247	11.0497	15.2746	10.3997	21.4495	19.8245	24.6994	23.7244
1268	14.9496	19.8245	12.0247	11.6997	15.5996	10.3997	21.7745	19.8245	24.6994	23.3994
1269	14.6246	19.8245	12.0247	11.6997	15.9246	10.3997	21.4495	19.8245	24.6994	23.3994
1270	14.9496	19.8245	12.0247	11.3747	15.5996	10.3997	21.4495	19.8245	24.3744	23.3994
1271	14.9496	20.1495	11.3747	11.6997	15.5996	10.3997	22.0994	20.1495	24.3744	23.3994
1272	14.9496	19.8245	12.0247	11.3747	15.9246	10.3997	21.4495	19.8245	24.0494	23.7244
1273	14.9496	19.8245	12.0247	11.6997	15.9246	10.3997	21.7745	19.8245	24.6994	23.3994
1274	14.9496	20.1495	12.0247	11.3747	15.5996	10.3997	21.1245	19.8245	24.6994	23.3994
1275	14.9496	19.8245	12.0247	11.3747	15.2746	10.3997	21.4495	20.1495	25.0244	23.3994
1276	14.9496	19.8245	12.0247	11.3747	15.2746	10.3997	21.7745	20.1495	24.6994	23.0744
1277	14.9496	20.1495	12.0247	11.6997	15.5996	10.3997	21.7745	20.1495	24.6994	23.3994
1278	14.9496	20.1495	12.0247	11.6997	15.5996	10.3997	20.7995	19.8245	24.3744	23.3994
1279	14.9496	19.8245	12.0247	11.3747	15.5996	10.3997	21.4495	20.1495	24.6994	23.3994
1280	14.9496	19.8245	12.0247	11.3747	15.5996	10.3997	21.1245	19.8245	24.6994	23.7244
1281	14.9496	19.8245	12.0247	11.3747	15.2746	10.3997	21.7745	20.1495	24.3744	23.0744
1282	14.9496	20.1495	11.6997	11.3747	15.9246	10.3997	21.1245	20.1495	24.3744	23.3994
1283	14.9496	19.8245	12.0247	11.0497	15.5996	10.3997	21.1245	20.1495	24.6994	23.0744
1284	14.9496	19.8245	12.0247	11.3747	15.5996	10.3997	21.4495	20.1495	24.3744	23.0744
1285	14.6246	20.1495	12.0247	11.3747	14.9496	10.3997	21.1245	20.1495	24.3744	23.3994
1286	14.9496	19.8245	12.0247	11.3747	15.5996	10.3997	21.1245	20.1495	24.3744	23.7244
1287	14.6246	20.1495	12.0247	11.3747	15.2746	10.3997	21.4495	20.1495	24.6994	23.3994
1288	14.9496	19.4995	12.0247	11.0497	15.2746	10.3997	21.1245	20.1495	24.0494	23.7244
1289	14.6246	20.1495	12.0247	11.0497	15.2746	10.3997	21.1245	20.1495	25.0244	23.7244
1290	14.9496	20.1495	12.0247	11.3747	15.5996	10.3997	21.7745	19.8245	24.6994	23.0744
1291	14.9496	19.1745	12.0247	11.0497	15.5996	10.3997	21.4495	20.1495	24.0494	23.0744
1292	14.9496	19.8245	12.0247	11.3747	15.9246	10.3997	21.4495	19.8245	24.3744	23.7244
1293	14.9496	19.8245	12.0247	11.3747	15.2746	10.3997	21.1245	20.1495	24.6994	23.0744
1294	14.9496	19.8245	12.0247	11.3747	15.2746	10.3997	21.1245	19.8245	24.3744	23.3994
1295	14.6246	19.4995	12.0247	11.0497	15.2746	10.3997	21.1245	20.1495	24.3744	23.7244
1296	14.2996	19.8245	12.0247	11.3747	15.5996	10.3997	21.4495	20.1495	24.6994	23.3994
1297	14.9496	19.8245	12.0247	11.6997	15.2746	10.3997	21.4495	20.1495	24.6994	24.0494
1298	14.9496	19.4995	12.0247	11.3747	15.2746	10.3997	21.4495	20.1495	24.0494	23.3994
1299	14.6246	19.8245	12.0247	11.0497	14.9496	10.3997	21.1245	20.1495	24.6994	23.0744
1300	14.9496	19.4995	12.0247	11.0497	15.5996	10.3997	21.7745	19.8245	24.3744	23.0744
1301	14.2996	19.4995	12.0247	11.0497	15.5996	10.3997	21.1245	20.1495	24.3744	23.3994
1302	14.6246	19.4995	12.0247	11.0497	15.2746	10.3997	21.1245	19.8245	24.6994	23.0744
1303	14.2996	19.8245	12.0247	11.3747	15.5996	10.3997	21.4495	20.1495	24.6994	23.3994
1304	14.2996	19.8245	12.0247	11.3747	15.2746	10.3997	21.4495	20.1495	24.3744	22.7494
1305	14.2996	19.8245	12.0247	11.3747	15.5996	10.3997	21.1245	20.1495	24.6994	23.3994
1306	14.6246	19.4995	12.0247	11.6997	15.9246	10.3997	21.4495	19.8245	24.3744	23.3994
1307	14.6246	19.8245	12.0247	11.3747	15.5996	10.3997	21.4495	19.8245	24.3744	23.3994
1308	14.6246	19.8245	12.0247	11.0497	15.9246	10.3997	21.4495	20.1495	24.6994	23.7244
1309	14.2996	19.8245	12.0247	11.3747	15.2746	10.3997	21.1245	19.8245	24.3744	23.0744
1310	14.6246	19.8245	12.0247	11.0497	14.9496	10.3997	21.1245	19.8245	24.3744	23.3994
1311	14.6246	19.8245	12.0247	11.0497	15.5996	10.0747	21.1245	20.1495	24.6994	23.3994
1312	14.9496	20.1495	12.0247	11.3747	15.2746	10.3997	21.4495	20.1495	24.3744	23.0744
1313	14.9496	20.1495	12.3497	11.3747	16.5746	10.0747	21.4495	20.1495	24.6994	23.0744
1314	14.6246	19.8245	12.0247	11.3747	15.2746	10.3997	21.4495	20.1495	24.3744	23.3994
1315	14.6246	20.1495	12.0247	11.0497	15.2746	10.3997	21.4495	20.1495	24.6994	23.3994
1316	14.6246	19.8245	12.0247	11.0497	15.2746	10.3997	21.1245	20.1495	24.6994	23.7244
1317	14.6246	19.8245	12.0247	11.3747	15.2746	10.3997	21.4495	19.8245	24.6994	23.3994
1318		19.8245	12.0247	11.0497	14.9496	10.3997	21.4495	20.1495	24.3744	23.3994
1319		19.8245	12.0247	11.0497	15.2746	10.3997	21.1245	20.1495	24.3744	23.0744
1320		19.8245	12.0247	11.0497	15.5996	10.3997	21.4495	19.8245	24.3744	23.3994
1321		20.1495	11.6997	11.0497	15.2746	10.3997	21.7745	19.8245	24.6994	23.7244
1322		19.8245	11.3747	11.0497	14.6246	10.3997	21.4495	20.1495	24.3744	23.7244
1323		19.8245	11.3747	11.3747	15.2746	10.3997	21.1245	19.8245	24.3744	23.0744
1324		19.8245	11.6997	10.7247	15.2746	10.0747	21.7745	20.1495	24.3744	23.3994
1325	14.9496	19.8245	11.6997	11.0497	15.2746	10.3997	21.7745	20.1495	24.0494	23.3994
1326	14.9496	19.4995	11.6997	11.3747	15.2746	10.3997	21.7745	19.8245	24.3744	23.0744
1327	14.9496	20.1495	11.6997	11.0497	15.2746	10.0747	21.4495	19.8245	24.6994	23.7244
1328	14.9496	20.1495	12.0247	11.0497	15.2746	10.3997	21.4495	20.1495	24.3744	23.7244
1329	14.9496	20.1495	12.0247	11.3747	15.9246	10.3997	21.1245	20.1495	24.3744	23.3994
1330	14.9496	20.1495	12.0247	11.0497	15.5996	10.3997	22.0994	20.1495	25.0244	23.7244
1331	14.9496	19.8245	11.6997	11.0497	15.9246	10.3997	21.7745	19.8245	24.6994	23.0744
1332	14.9496	19.8245	11.6997	11.3747	15.2746	10.0747	21.4495	19.8245	24.6994	23.0744
1333	14.9496	19.8245	12.0247	11.0497	15.2746	10.3997	21.7745	19.8245	24.0494	23.3994
1334	14.9496	19.8245	11.6997	11.0497	14.9496	10.3997	21.4495	19.8245	24.0494	23.0744
1335	14.6246	19.4995	11.6997	11.3747	15.5996	10.3997	21.4495	19.8245	24.6994	23.3994
1336	14.6246	19.4995	11.6997	11.0497	15.9246	10.3997	21.4495	19.8245	24.3744	23.3994
1337	14.9496	19.8245	11.6997	11.3747	15.5996	10.3997	21.4495	19.8245	24.6994	22.7494
1338	14.9496	19.8245	12.0247	11.6997	14.9496	10.3997	22.0994	19.8245	24.6994	23.3994
1339	14.9496	19.8245	11.6997	12.0247	15.5996	10.3997	21.7745	19.8245	24.6994	22.7494
1340	14.9496	19.8245	12.0247	12.3497	15.5996	10.3997	22.0994	19.8245	24.3744	23.7244
1341	14.9496	19.8245	12.0247	11.6997	15.2746	10.3997	22.0994	20.1495	24.0494	23.3994
1342	15.2746	20.1495	12.0247	12.3497	15.5996	10.3997	21.7745	19.8245	24.6994	23.0744
1343	15.2746	19.8245	12.0247	12.0247	15.9246	10.3997	22.0994	20.1495	24.6994	23.7244
1344	15.2746	19.8245	12.0247	11.3747	16.2496	10.3997	22.0994	19.8245	24.3744	23.3994
1345	15.2746	19.8245	12.0247	11.3747	15.2746	10.3997	21.7745	19.8245	24.3744	24.0494
1346	15.2746	19.8245	12.0247	12.0247	15.9246	10.3997	21.7745	19.8245	24.6994	23.7244
1347	14.9496	19.8245	12.0247	11.6997	15.5996	10.0747	21.7745	19.8245	24.0494	23.3994
1348	14.9496	20.1495	12.0247	11.6997	14.9496	10.3997	22.4244	19.8245	24.3744	23.3994
1349	14.9496	19.4995	11.6997	11.3747	15.9246	10.3997	22.0994	19.8245	24.3744	23.0744
1350	14.9496	19.8245	12.0247	11.6997	15.2746	10.3997	22.4244	20.1495	24.3744	23.3994
1351	14.9496	19.8245	11.6997	11.6997	14.9496	10.3997	21.7745	20.1495	24.0494	23.3994
1352	14.9496	19.8245	12.0247	11.6997	15.2746	10.0747	22.0994	19.8245	24.3744	23.3994
1353	14.9496	19.8245	12.0247	11.3747	15.2746	10.3997	21.7745	20.1495	24.0494	23.3994
1354	14.9496	20.1495	12.0247	11.3747	15.2746	10.3997	21.7745	19.8245	24.6994	23.0744
1355	14.9496	20.1495	12.0247	11.3747	14.9496	10.0747	22.0994	19.8245	24.3744	23.0744
1356	14.9496	19.8245	12.0247	12.0247	15.5996	10.3997	21.7745	19.4995	24.3744	23.0744
1357	14.9496	20.1495	11.6997	11.6997	15.2746	10.3997	22.0994	19.8245	24.3744	23.0744
1358	14.9496	19.8245	12.0247	11.6997	15.2746	10.3997	22.0994	20.1495	24.3744	23.3994
1359	14.9496	20.1495	12.0247	12.0247	15.2746	10.3997	22.0994	19.8245	24.3744	23.3994
1360	14.9496	19.8245	11.6997	11.0497	15.2746	10.3997	21.4495	19.8245	24.6994	23.0744
1361	14.9496	20.1495	11.6997	11.3747	15.2746	10.3997	22.0994	19.8245	24.3744	23.3994
1362	14.9496	19.4995	11.6997	11.3747	15.2746	10.3997	22.0994	19.8245	24.3744	23.3994
1363	14.9496	19.8245	11.6997	11.0497	14.9496	10.3997	22.4244	20.1495	24.6994	23.3994
1364	14.9496	19.4995	11.6997	11.6997	15.2746	10.0747	22.0994	19.8245	24.6994	23.3994
1365	14.6246	19.4995	12.0247	11.6997	15.2746	10.3997	22.0994	19.8245	24.3744	23.0744
1366	14.9496	20.1495	11.6997	11.0497	15.5996	10.0747	22.0994	19.8245	24.0494	23.3994
1367	15.2746	19.8245	12.0247	11.6997	15.2746	10.3997	22.0994	20.1495	24.3744	23.3994
1368	15.2746	19.8245	11.6997	11.0497	15.2746	10.0747	21.7745	19.8245	24.6994	23.3994
1369	15.2746	19.8245	11.6997	11.3747	15.2746	10.0747	21.7745	20.1495	24.6994	23.7244
1370	15.2746	19.8245	11.6997	11.3747	15.2746	10.3997	21.4495	19.8245	24.6994	24.0494
1371	14.9496	19.8245	12.0247	11.3747	14.6246	10.3997	21.4495	19.8245	25.0244	23.0744
1372	15.2746	20.1495	11.6997	11.6997	14.9496	10.3997	21.4495	19.8245	24.3744	22.7494
1373	15.2746	19.8245	11.6997	11.3747	14.6246	10.3997	21.4495	19.8245	24.0494	23.3994
1374	15.2746	20.1495	11.6997	11.3747	15.2746	10.3997	21.7745	19.8245	24.3744	23.7244
1375	14.9496	19.8245	11.6997	11.0497	15.2746	10.3997	21.4495	20.1495	24.6994	23.3994
1376	14.9496	20.1495	11.6997	11.3747	14.9496	10.3997	21.7745	19.8245	24.6994	23.0744
1377	14.9496	19.8245	12.0247	11.3747	15.5996	10.3997	21.4495	19.8245	24.6994	23.3994
1378	14.9496	19.8245	11.6997	11.3747	14.6246	10.3997	21.4495	19.8245	24.6994	23.7244
1379	14.9496	19.8245	11.6997	11.6997	15.2746	10.3997	21.4495	19.8245	24.3744	23.0744
1380	14.9496	19.8245	11.6997	11.3747	14.9496	10.0747	21.4495	20.1495	24.6994	24.0494
1381	14.6246	20.1495	11.6997	11.3747	14.6246	10.3997	21.7745	19.4995	24.6994	23.7244
1382	14.6246	19.4995	12.0247	12.0247	14.9496	10.0747	21.4495	19.8245	24.6994	23.3994
1383	14.6246	20.1495	11.6997	11.0497	14.9496	10.0747	21.7745	20.1495	24.6994	23.3994
1384	14.9496	19.8245	12.0247	11.3747	14.9496	10.0747	21.4495	19.8245	24.3744	23.0744
1385	14.9496	19.8245	11.6997	11.3747	14.6246	10.0747	21.7745	19.8245	24.6994	23.3994
1386	14.9496	19.8245	12.0247	11.3747	15.5996	10.3997	21.4495	19.8245	24.3744	23.3994
1387	14.9496	19.8245	11.6997	12.0247	15.5996	10.0747	21.7745	19.8245	24.3744	23.3994
1388	14.9496	19.8245	11.6997	11.3747	15.2746	10.3997	21.1245	19.8245	24.3744	23.0744
1389	14.9496	19.4995	12.0247	11.6997	15.2746	10.0747	22.0994	20.1495	24.6994	23.3994
1390	14.9496	20.1495	12.0247	11.3747	15.2746	10.0747	21.4495	19.8245	24.3744	23.0744
1391	15.2746	19.8245	12.0247	11.3747	14.9496	10.0747	21.7745	19.8245	24.3744	23.3994
1392	14.9496	19.8245	12.0247	11.6997	15.5996	10.0747	21.4495	20.1495	24.6994	23.7244
1393	14.9496	19.8245	11.6997	11.3747	15.2746	10.0747	21.4495	19.8245	24.6994	23.7244
1394	14.9496	19.8245	12.0247	11.3747	15.9246	10.0747	21.4495	19.8245	24.6994	23.7244
1395	14.6246	19.8245	11.6997	11.3747	15.9246	10.0747	21.4495	20.1495	24.3744	23.3994
1396	14.9496	19.4995	11.6997	11.3747	15.9246	10.0747	21.1245	19.8245	24.0494	23.3994
1397	14.2996	19.8245	11.6997	11.3747	15.5996	10.3997	21.4495	20.1495	24.3744	23.7244
1398	14.6246	20.1495	12.0247	11.3747	15.5996	10.0747	21.1245	19.8245	24.3744	23.7244
1399	14.9496	19.8245	12.0247	11.6997	15.2746	10.0747	21.4495	19.8245	24.3744	23.0744
1400	14.6246	19.4995	11.6997	11.6997	14.9496	10.0747	21.4495	19.8245	24.6994	23.7244
1401	14.2996	19.8245	12.0247	11.3747	14.9496	10.0747	21.7745	19.8245	24.3744	23.7244
1402	14.6246	19.8245	11.6997	11.0497	15.5996	10.0747	21.4495	20.1495	24.3744	23.0744
1403	14.2996	19.8245	12.0247	11.3747	14.9496	10.0747	21.1245	19.8245	24.6994	23.3994
1404	14.6246	19.8245	11.6997	11.3747	14.9496	10.0747	21.4495	19.8245	25.3494	22.7494
1405	14.6246	20.1495	11.6997	11.3747	15.2746	10.0747	21.1245	19.8245	24.3744	23.7244
1406	14.6246	19.4995	11.6997	11.3747	15.2746	10.3997	21.7745	20.1495	24.0494	23.3994
1407	14.6246	19.4995	12.0247	11.3747	14.6246	10.0747	21.4495	19.8245	24.6994	23.3994
1408	14.2996	19.8245	11.6997	11.3747	14.6246	10.0747	21.1245	19.8245	24.6994	23.0744
1409	14.2996	19.8245	11.6997	11.6997	14.9496	10.0747	21.4495	20.1495	24.3744	23.3994
1410	14.6246	19.8245	11.6997	11.3747	15.2746	10.3997	21.1245	20.1495	24.6994	23.3994
1411	14.6246	19.8245	11.6997	11.3747	14.9496	10.0747	21.4495	19.8245	24.0494	23.0744
1412	14.6246	19.4995	11.6997	11.6997	14.6246	10.0747	21.1245	20.1495	24.6994	23.3994
1413	14.6246	19.8245	11.6997	11.0497	15.5996	10.0747	21.4495	19.8245	24.0494	23.3994
1414	14.9496	19.8245	11.6997	11.3747	15.5996	10.0747	21.1245	19.8245	24.3744	23.3994
1415	14.9496	20.4745	11.6997	11.3747	15.2746	10.0747	21.4495	19.8245	24.3744	23.0744
1416	14.6246	19.8245	11.6997	10.7247	15.2746	10.0747	21.7745	19.8245	24.6994	23.0744
1417	14.9496	19.8245	11.6997	11.0497	15.9246	10.0747	21.4495	19.8245	24.3744	23.0744
1418	14.9496	19.8245	11.6997	11.0497	14.9496	10.0747	21.4495	19.8245	24.6994	23.7244
1419	14.9496	19.8245	11.6997	11.0497	15.2746	10.0747	21.1245	19.8245	24.6994	23.0744
1420	14.9496	20.1495	11.6997	11.0497	15.2746	10.0747	21.4495	19.8245	24.3744	24.0494
1421	14.9496	19.4995	11.6997	11.0497	15.9246	10.0747	21.1245	19.8245	24.3744	23.3994
1422	14.6246	19.8245	12.0247	11.0497	15.2746	10.0747	22.0994	19.8245	24.3744	23.3994
1423	14.6246	20.1495	11.6997	11.3747	15.2746	10.0747	21.7745	19.8245	24.6994	23.3994
1424	14.6246	20.1495	11.6997	10.7247	15.5996	10.0747	21.7745	19.8245	25.0244	23.3994
1425	14.9496	20.1495	11.6997	12.0247	15.2746	10.0747	21.4495	19.8245	24.3744	23.0744
1426	14.9496	19.4995	12.0247	11.3747	15.2746	10.3997	21.4495	19.8245	24.6994	23.3994
1427	14.9496	20.1495	12.0247	11.3747	14.9496	10.0747	21.1245	19.8245	24.6994	23.0744
1428	14.9496	19.8245	12.0247	11.6997	15.2746	10.0747	21.4495	19.8245	24.3744	24.0494
1429	14.6246	19.8245	11.6997	11.3747	14.9496	10.0747	21.7745	19.8245	24.6994	23.3994
1430	14.6246	19.4995	11.6997	11.0497	14.9496	10.0747	21.7745	19.8245	24.6994	23.7244
1431	14.6246	19.8245	11.6997	10.3997	15.5996	10.0747	21.4495	19.8245	24.3744	23.0744
1432	14.6246	19.8245	11.6997	11.0497	15.2746	10.0747	21.4495	20.1495	24.3744	23.3994
1433	14.6246	19.8245	11.6997	11.3747	14.6246	10.0747	21.4495	20.1495	24.6994	23.7244
1434	14.6246	19.4995	12.0247	11.0497	15.5996	10.0747	21.7745	20.1495	24.0494	23.3994
1435	14.6246	19.8245	12.0247	11.3747	14.9496	10.3997	21.7745	20.1495	24.3744	23.3994
1436	14.6246	19.8245	11.6997	11.0497	15.2746	10.0747	21.7745	20.1495	24.6994	23.3994
1437	14.6246	19.8245	11.6997	11.6997	15.2746	10.0747	22.0994	19.8245	24.3744	23.7244
1438	14.6246	19.8245	11.6997	12.0247	15.2746	10.3997	22.4244	19.8245	24.6994	23.7244
1439	14.6246	19.8245	11.6997	10.0747	14.6246	10.0747	21.4495	19.8245	24.6994	23.3994
1440	14.6246	19.8245	12.0247	10.3997	15.2746	10.0747	21.4495	19.8245	24.6994	23.3994
1441	14.6246	19.8245	11.6997	10.3997	14.9496	10.3997	21.7745	19.8245	24.6994	23.3994
1442	14.6246	19.8245	12.0247	10.7247	15.2746	10.0747	21.4495	19.8245	24.3744	23.3994
1443	14.6246	19.8245	11.6997	11.0497	14.9496	10.0747	21.4495	19.8245	24.3744	24.0494
1444	14.6246	19.8245	11.6997	11.3747	14.9496	10.0747	21.7745	19.8245	24.6994	23.7244
1445	14.6246	19.8245	11.6997	11.0497	14.9496	10.0747	21.4495	19.8245	24.3744	23.0744
1446	14.6246	19.8245	11.6997	11.0497	15.2746	10.0747	21.4495	19.8245	24.3744	23.3994
1447	14.6246	19.8245	11.6997	11.0497	14.9496	10.0747	21.1245	19.8245	24.3744	22.7494
1448	14.6246	20.1495	11.6997	11.0497	15.2746	10.3997	21.7745	19.8245	24.3744	23.0744
1449	14.6246	20.1495	11.6997	11.0497	14.2996	10.0747	21.7745	19.8245	24.0494	23.3994
1450	14.9496	20.1495	11.6997	10.7247	15.2746	10.0747	21.4495	20.1495	24.6994	23.0744
1451	14.9496	19.8245	12.0247	10.3997	14.9496	10.3997	21.1245	19.8245	24.3744	23.3994
1452	15.5996	19.8245	11.6997	10.7247	15.5996	10.0747	21.4495	19.8245	24.3744	23.0744
1453	14.9496	19.8245	11.6997	11.0497	15.5996	10.0747	21.4495	19.8245	24.3744	23.0744
1454	15.5996	20.1495	11.6997	11.0497	14.9496	10.0747	21.4495	19.8245	24.6994	23.7244
1455	15.5996	20.1495	11.6997	10.7247	15.5996	10.0747	21.1245	19.8245	24.6994	23.3994
1456	15.5996	19.8245	11.6997	10.7247	14.9496	10.0747	21.1245	20.1495	24.6994	23.3994
1457	15.5996	19.8245	11.6997	11.0497	15.2746	10.0747	21.1245	19.8245	24.6994	23.3994
1458	15.5996	19.8245	11.6997	11.3747	15.5996	10.3997	21.1245	19.8245	25.0244	23.3994
1459	15.5996	19.8245	11.6997	11.0497	14.9496	10.0747	21.1245	19.8245	24.0494	23.3994
1460	15.5996	20.4745	12.0247	10.7247	15.2746	10.0747	21.1245	20.1495	24.6994	23.3994
1461	15.5996	19.4995	12.0247	11.0497	15.2746	10.0747	21.4495	19.8245	24.3744	23.3994
1462	15.5996	19.8245	11.6997	11.0497	15.2746	10.3997	21.1245	19.8245	24.6994	23.3994
1463	15.5996	19.8245	11.6997	11.0497	14.9496	9.74976	21.1245	19.8245	24.6994	23.0744
1464	15.5996	20.1495	11.6997	10.7247	15.2746	10.3997	21.1245	19.8245	24.6994	23.3994
1465	15.5996	20.1495	11.6997	11.0497	14.9496	10.0747	21.1245	19.4995	25.3494	23.3994
1466	15.5996	19.4995	11.6997	11.0497	15.9246	10.0747	21.4495	19.8245	24.6994	23.7244
1467	15.5996	19.4995	11.6997	11.0497	15.2746	10.0747	21.4495	19.4995	24.3744	23.3994
1468	15.5996	20.1495	11.6997	11.0497	15.2746	10.3997	21.4495	19.8245	24.3744	23.7244
1469	15.5996	20.1495	11.6997	11.0497	14.9496	10.3997	20.7995	19.8245	24.3744	23.7244
1470	15.5996	20.1495	11.6997	11.0497	15.5996	10.0747	21.4495	19.8245	24.6994	23.7244
1471	15.5996	20.1495	11.6997	11.0497	15.5996	10.0747	21.1245	19.8245	24.6994	23.0744
1472	15.5996	20.1495	11.6997	11.0497	15.5996	10.3997	21.4495	19.8245	25.0244	23.3994
1473	15.2746	20.1495	11.6997	11.0497	14.6246	10.0747	21.1245	19.8245	24.3744	23.0744
1474	15.5996	20.7995	11.6997	11.0497	14.9496	10.0747	21.4495	19.8245	24.3744	23.0744
1475	15.2746	20.1495	12.0247	11.0497	14.9496	10.3997	20.7995	19.8245	24.3744	23.7244
1476	15.5996	20.1495	11.6997	11.0497	15.2746	10.0747	21.1245	19.8245	24.6994	23.0744
1477	15.5996	20.1495	11.6997	11.0497	15.2746	10.0747	20.7995	19.8245	24.3744	22.7494
1478	15.5996	19.8245	11.6997	11.0497	15.2746	10.0747	21.4495	19.8245	24.6994	23.3994
1479	15.5996	19.8245	11.6997	11.0497	15.2746	10.0747	21.7745	19.8245	24.3744	23.3994
1480	15.5996	19.8245	11.6997	11.0497	14.9496	10.0747	21.1245	19.8245	24.3744	22.4244
1481	15.5996	20.1495	11.6997	10.7247	14.6246	9.74976	21.1245	20.1495	24.6994	23.0744
1482	15.2746	19.8245	11.6997	11.0497	15.5996	10.0747	21.4495	19.8245	25.0244	23.0744
1483	15.2746	19.8245	11.6997	11.0497	14.9496	10.0747	21.7745	19.8245	24.3744	23.3994
1484	15.2746	20.1495	11.6997	11.0497	15.2746	10.0747	21.1245	19.8245	24.6994	22.7494
1485	15.2746	19.4995	11.6997	11.0497	15.5996	10.0747	21.4495	19.8245	25.0244	23.0744
1486	15.2746	20.1495	11.6997	10.7247	14.6246	10.0747	21.1245	19.8245	24.6994	23.0744
1487	15.5996	19.8245	12.0247	10.7247	14.9496	10.0747	21.4495	19.8245	25.0244	23.3994
1488	15.5996	20.4745	12.0247	11.0497	14.9496	10.3997	21.1245	19.8245	24.3744	23.3994
1489	15.5996	19.8245	12.0247	11.0497	14.6246	10.3997	20.7995	19.8245	24.0494	23.3994
1490	15.2746	20.1495	12.0247	11.0497	15.2746	10.0747	21.4495	19.8245	24.6994	23.0744
1491	15.5996	19.8245	12.0247	11.0497	14.9496	10.0747	21.1245	19.8245	24.6994	23.3994
1492	15.5996	20.1495	12.0247	11.0497	15.2746	10.0747	21.4495	19.8245	24.6994	23.3994
1493	15.5996	19.8245	12.0247	11.0497	15.2746	10.0747	20.7995	19.8245	24.6994	23.0744
1494	15.5996	19.4995	11.6997	11.0497	15.2746	10.0747	21.4495	19.8245	24.6994	22.7494
1495	15.5996	20.1495	12.0247	11.0497	14.9496	10.0747	21.1245	19.8245	24.6994	23.0744
1496	15.5996	20.4745	12.0247	11.0497	15.5996	10.0747	20.7995	19.8245	24.6994	23.7244
1497	15.5996	20.1495	12.0247	11.0497	15.5996	10.0747	21.1245	19.8245	24.6994	22.7494
1498	15.5996	20.1495	12.0247	10.7247	15.2746	10.0747	20.7995	19.4995	24.6994	23.3994
1499	15.5996	19.8245	12.3497	11.0497	15.2746	10.0747	20.7995	19.8245	24.6994	23.0744
1500	15.5996	19.8245	12.0247	11.0497	15.9246	10.3997	21.1245	19.8245	24.6994	23.7244
1501	15.5996	20.1495	11.6997	11.0497	15.9246	10.0747	20.7995	19.8245	24.6994	22.0994
1502	15.2746	20.1495	12.0247	11.0497	15.9246	10.0747	21.4495	20.1495	25.0244	23.0744
1503	15.5996	19.8245	12.0247	11.0497	15.2746	10.0747	20.4745	19.8245	24.3744	23.3994
1504	15.5996	19.8245	12.0247	10.7247	15.5996	10.0747	20.4745	19.8245	24.3744	23.0744
1505	15.5996	19.8245	11.6997	11.0497	15.9246	10.0747	21.1245	19.8245	24.3744	23.0744
1506	15.2746	20.1495	11.6997	11.0497	15.5996	10.0747	21.1245	19.8245	24.0494	23.3994
1507	15.2746	20.1495	12.0247	10.7247	15.2746	10.0747	20.7995	19.8245	24.3744	23.7244
1508	15.2746	20.1495	12.0247	11.0497	15.2746	10.0747	20.7995	19.4995	24.3744	23.3994
1509	15.2746	20.1495	12.3497	11.0497	15.2746	10.7247	20.7995	19.4995	24.0494	23.0744
1510	15.2746	20.1495	12.0247	11.0497	15.2746	10.3997	20.7995	19.4995	24.3744	23.0744
1511	15.2746	19.8245	12.0247	11.0497	15.2746	10.0747	20.4745	19.8245	24.6994	23.3994
1512	15.5996	20.1495	12.0247	10.7247	15.9246	10.0747	20.7995	19.8245	24.6994	23.3994
1513	15.5996	20.1495	12.0247	11.0497	15.2746	10.0747	21.4495	19.8245	24.6994	23.7244
1514	15.5996	20.4745	12.0247	11.0497	15.2746	10.0747	20.7995	19.8245	24.6994	22.7494
1515	15.5996	20.1495	11.6997	10.7247	15.9246	10.3997	21.7745	19.8245	24.3744	23.3994
1516	15.9246	20.1495	12.0247	11.0497	16.5746	10.3997	21.7745	19.8245	24.6994	23.7244
1517	15.9246	19.4995	12.3497	11.0497	15.5996	10.0747	21.4495	19.8245	24.6994	23.7244
1518	15.9246	20.1495	12.0247	11.3747	15.2746	10.0747	21.1245	19.8245	24.6994	23.0744
1519	15.9246	20.1495	12.0247	11.0497	14.9496	10.0747	21.4495	19.8245	24.3744	23.3994
1520	15.9246	19.8245	12.0247	11.0497	15.2746	10.0747	21.4495	20.1495	24.3744	23.7244
1521	15.9246	19.8245	12.0247	11.0497	15.5996	10.0747	20.7995	20.1495	25.0244	23.0744
1522	15.9246	20.1495	12.3497	11.0497	15.2746	10.0747	20.7995	19.4995	24.3744	23.3994
1523	15.9246	19.8245	12.0247	11.0497	15.2746	10.0747	21.1245	19.8245	24.0494	23.7244
1524	15.9246	19.8245	12.0247	11.0497	15.2746	10.0747	20.7995	19.8245	24.0494	23.0744
1525	15.9246	20.1495	12.0247	11.0497	14.9496	10.0747	20.7995	19.8245	24.3744	23.0744
1526	15.9246	20.1495	12.3497	11.0497	15.9246	10.0747	21.4495	19.8245	24.6994	22.7494
1527	15.9246	20.1495	12.0247	11.0497	14.9496	10.0747	21.1245	19.8245	24.3744	23.3994
1528	15.9246	20.1495	12.0247	11.0497	15.2746	10.0747	21.1245	19.8245	24.0494	22.4244
1529	15.9246	20.1495	12.0247	11.3747	14.9496	10.3997	20.4745	19.8245	24.0494	23.0744
1530	15.9246	20.1495	12.0247	11.0497	15.2746	10.3997	20.7995	19.8245	24.6994	23.0744
1531	15.9246	20.1495	12.0247	11.0497	15.2746	10.3997	21.1245	19.8245	24.6994	23.0744
1532	15.9246	20.1495	12.0247	11.0497	15.2746	10.0747	21.1245	19.8245	24.3744	22.4244
1533	15.5996	20.4745	12.0247	11.0497	15.5996	10.0747	21.1245	19.8245	24.6994	23.7244
1534	15.9246	19.8245	12.0247	11.0497	15.2746	10.3997	20.7995	19.8245	24.3744	23.3994
1535	15.9246	19.8245	11.6997	10.7247	15.2746	10.0747	21.1245	19.8245	24.6994	22.7494
1536	15.9246	20.1495	12.0247	10.7247	15.5996	10.3997	20.4745	19.8245	24.6994	23.3994
1537	15.9246	20.1495	12.0247	11.0497	15.2746	10.3997	20.4745	19.8245	24.6994	23.7244
1538	15.9246	20.1495	12.0247	11.0497	14.9496	10.0747	20.7995	19.8245	23.7244	23.0744
1539	15.9246	20.1495	12.0247	11.0497	15.5996	10.0747	20.7995	19.8245	24.3744	23.7244
1540	15.9246	19.8245	12.0247	11.0497	15.5996	10.3997	20.7995	19.8245	24.6994	23.3994
1541	15.9246	20.1495	12.0247	11.3747	15.2746	10.0747	21.1245	19.8245	24.6994	23.7244
1542	15.9246	20.1495	12.0247	11.0497	15.2746	10.0747	20.7995	19.8245	24.6994	23.0744
1543	15.9246	19.8245	12.3497	11.0497	15.2746	10.0747	20.4745	19.8245	24.3744	23.7244
1544	16.2496	20.1495	12.0247	11.0497	15.5996	10.3997	21.7745	19.8245	24.3744	23.3994
1545	15.9246	20.1495	12.0247	11.0497	14.9496	10.3997	21.1245	19.4995	24.3744	23.3994
1546	15.9246	20.1495	12.0247	11.0497	15.2746	10.3997	20.7995	20.1495	24.6994	23.0744
1547	16.2496	19.8245	12.0247	11.0497	15.5996	10.3997	20.7995	20.1495	24.3744	23.3994
1548	16.2496	20.4745	12.3497	11.0497	15.5996	10.0747	21.1245	19.8245	24.3744	23.3994
1549	15.9246	20.1495	12.0247	11.0497	15.9246	10.3997	20.4745	19.8245	24.3744	23.0744
1550	16.2496	20.1495	12.0247	11.0497	15.5996	10.3997	21.1245	19.8245	24.3744	23.3994
1551	16.2496	20.1495	12.0247	11.0497	15.2746	10.7247	20.7995	19.8245	24.6994	23.3994
1552	16.2496	20.1495	12.0247	11.0497	15.5996	10.0747	21.7745	19.8245	24.3744	23.0744
1553	15.9246	20.1495	12.0247	11.0497	15.5996	10.3997	21.1245	19.8245	24.3744	24.0494
1554	15.9246	20.1495	12.0247	10.7247	15.2746	9.74976	21.4495	19.8245	24.3744	23.3994
1555	16.2496	19.8245	11.6997	11.0497	15.5996	10.0747	21.1245	19.8245	24.6994	22.7494
1556	15.9246	20.4745	11.6997	11.0497	15.2746	10.3997	20.7995	19.8245	24.3744	23.7244
1557	16.2496	20.1495	12.0247	11.0497	15.5996	10.0747	20.7995	19.8245	24.6994	23.3994
1558	15.9246	20.1495	12.0247	11.0497	15.2746	10.3997	21.1245	19.8245	24.6994	23.0744
1559	16.2496	20.1495	12.0247	11.0497	15.2746	10.3997	20.4745	19.4995	24.6994	22.4244
1560	16.2496	19.8245	12.0247	11.3747	15.2746	10.3997	20.4745	19.8245	24.0494	23.3994
1561	16.2496	19.8245	12.0247	11.0497	15.2746	10.3997	20.7995	19.8245	24.6994	23.7244
1562	16.2496	20.1495	12.0247	11.0497	14.9496	10.3997	20.7995	19.8245	24.6994	23.3994
1563	15.9246	20.1495	11.6997	11.0497	15.9246	10.3997	20.7995	19.8245	24.6994	23.3994
1564	15.9246	20.4745	12.0247	11.0497	15.5996	10.3997	20.4745	19.8245	24.6994	22.7494
1565	16.2496	20.1495	12.0247	11.0497	15.2746	10.3997	20.7995	19.4995	24.6994	23.0744
1566	16.2496	20.4745	12.0247	11.0497	15.2746	10.7247	20.7995	19.8245	24.3744	23.7244
1567	16.2496	20.1495	11.6997	10.7247	14.9496	10.3997	20.7995	19.4995	24.0494	23.7244
1568	15.9246	19.8245	12.0247	11.0497	14.6246	10.3997	21.1245	19.4995	24.3744	23.7244
1569	16.2496	19.8245	12.0247	11.0497	15.2746	10.0747	21.1245	19.4995	24.0494	23.3994
1570	16.2496	20.1495	12.0247	11.0497	15.5996	10.3997	20.4745	19.4995	24.3744	23.0744
1571	15.9246	19.4995	12.0247	11.0497	15.2746	10.3997	20.7995	19.1745	23.7244	23.0744
1572	15.9246	20.4745	12.0247	11.0497	15.5996	10.0747	21.1245	19.8245	24.6994	23.0744
1573	16.2496	20.1495	12.0247	11.0497	15.5996	10.0747	20.4745	19.4995	23.7244	23.3994
1574	16.2496	20.1495	12.0247	11.0497	15.2746	10.3997	21.4495	19.8245	24.6994	23.7244
1575	16.2496	20.4745	12.0247	11.0497	15.2746	10.0747	21.1245	19.4995	24.3744	23.3994
1576	16.2496	20.1495	12.0247	11.0497	15.5996	10.3997	20.7995	19.8245	24.0494	24.0494
1577	16.2496	20.1495	12.0247	11.0497	15.5996	10.0747	20.7995	19.4995	24.0494	22.7494
1578	16.2496	20.1495	12.0247	10.7247	15.2746	10.3997	21.1245	19.4995	24.0494	23.3994
1579	16.2496	19.8245	12.0247	11.0497	15.9246	10.3997	20.7995	19.4995	24.3744	23.3994
1580	16.2496	20.1495	12.0247	11.0497	15.5996	10.3997	20.7995	19.4995	24.3744	23.0744
1581	16.2496	20.1495	12.0247	11.0497	15.2746	10.3997	21.1245	19.8245	24.0494	23.3994
1582	16.2496	19.8245	12.0247	11.0497	15.2746	10.0747	21.1245	19.4995	24.3744	23.7244
1583	15.9246	20.1495	12.0247	11.0497	15.2746	10.3997	20.7995	19.4995	24.0494	23.0744
1584	16.2496	20.1495	12.0247	11.0497	15.2746	10.3997	20.7995	19.4995	24.3744	23.3994
1585	16.2496	19.4995	12.0247	11.0497	15.5996	10.7247	21.1245	19.4995	24.0494	23.7244
1586	16.2496	19.8245	12.0247	11.0497	15.5996	10.3997	20.4745	19.8245	24.3744	23.3994
1587	16.2496	20.1495	11.6997	10.7247	15.2746	10.0747	20.4745	19.4995	24.0494	23.7244
1588	16.2496	20.4745	12.0247	11.0497	15.2746	10.0747	20.1495	19.4995	24.0494	23.7244
1589	16.2496	19.8245	12.0247	11.0497	15.5996	10.3997	20.7995	19.8245	24.0494	23.3994
1590	16.2496	20.4745	12.0247	11.0497	15.2746	10.3997	20.7995	19.4995	23.7244	23.3994
1591	16.2496	19.4995	12.0247	11.0497	15.2746	10.0747	20.1495	19.4995	24.0494	23.3994
1592	16.5746	19.4995	12.0247	11.0497	15.5996	10.3997	20.7995	19.4995	24.0494	23.7244
1593	15.9246	19.8245	12.0247	11.0497	15.5996	10.7247	20.7995	19.4995	24.6994	23.3994
1594	15.9246	19.4995	12.0247	11.0497	15.2746	10.0747	20.4745	19.4995	24.0494	23.0744
1595	16.8996	20.4745	12.0247	11.3747	14.9496	10.3997	20.7995	19.8245	24.0494	23.0744
1596	16.5746	19.8245	12.0247	11.0497	16.5746	10.3997	20.4745	19.4995	23.7244	23.3994
1597	16.5746	19.8245	12.0247	11.3747	15.9246	10.3997	20.4745	19.8245	24.0494	23.3994
1598	16.2496	19.8245	12.0247	11.3747	15.5996	10.3997	20.4745	19.4995	24.3744	22.7494
1599	15.9246	19.8245	12.0247	11.3747	15.2746	10.0747	20.1495	19.4995	24.6994	23.7244
1600	15.9246	19.8245	12.0247	11.3747	15.2746	10.0747	20.1495	19.4995	24.3744	23.7244
1601	15.9246	19.8245	12.0247	11.3747	15.5996	10.3997	20.4745	19.4995	24.3744	23.3994
1602	15.5996	19.8245	12.0247	11.0497	15.2746	10.0747	20.4745	19.4995	24.0494	23.3994
1603	15.9246	19.8245	12.0247	11.0497	15.9246	10.3997	20.4745	19.4995	24.3744	23.0744
1604	15.5996	19.8245	12.0247	11.3747	15.2746	10.0747	20.7995	19.4995	24.6994	23.0744
1605	15.9246	20.4745	12.0247	11.0497	15.5996	10.0747	20.1495	19.4995	23.7244	22.7494
1606	15.9246	19.4995	12.0247	11.0497	15.2746	10.3997	20.7995	19.4995	24.3744	23.3994
1607	15.5996	20.1495	12.0247	11.3747	15.5996	10.3997	20.4745	19.4995	24.0494	23.3994
1608	15.5996	19.4995	12.0247	11.0497	15.2746	10.3997	20.7995	19.4995	24.0494	23.3994
1609	14.9496	19.8245	12.0247	11.3747	15.2746	10.0747	20.1495	19.4995	24.0494	23.3994
1610	15.2746	19.8245	12.0247	11.3747	15.2746	10.3997	20.4745	19.4995	23.7244	23.3994
1611	15.5996	19.8245	12.0247	11.0497	15.5996	10.3997	20.1495	19.4995	24.0494	23.0744
1612	15.5996	20.1495	12.0247	11.0497	15.9246	10.3997	20.7995	19.8245	24.0494	23.0744
1613	15.5996	20.1495	12.0247	11.3747	15.2746	10.3997	21.1245	19.4995	24.0494	23.7244
1614	15.5996	20.1495	12.0247	11.0497	14.9496	10.0747	21.4495	19.4995	23.7244	23.3994
1615	15.5996	20.4745	12.0247	11.3747	15.5996	10.0747	20.7995	19.4995	24.0494	23.3994
1616	15.5996	20.1495	12.0247	11.0497	15.9246	10.3997	21.1245	19.4995	24.3744	23.0744
1617	15.5996	19.4995	12.0247	11.3747	16.2496	10.3997	21.1245	19.4995	24.0494	23.7244
1618	15.5996	19.4995	12.0247	11.0497	15.9246	10.0747	20.7995	19.4995	24.0494	23.0744
1619	15.5996	19.8245	12.0247	11.0497	14.9496	10.3997	20.4745	19.1745	24.0494	23.7244
1620	15.5996	19.4995	12.0247	11.0497	15.2746	10.0747	21.4495	19.4995	24.3744	23.3994
1621	15.5996	20.1495	12.0247	11.3747	15.5996	10.0747	21.1245	19.4995	23.7244	23.3994
1622	15.5996	19.8245	12.0247	11.3747	15.5996	10.3997	21.1245	19.8245	24.0494	24.0494
1623	15.5996	20.1495	12.0247	11.0497	15.2746	10.3997	21.1245	19.8245	24.0494	23.7244
1624	15.5996	20.1495	12.0247	11.0497	15.5996	10.0747	21.4495	19.8245	24.0494	23.7244
1625	15.5996	20.1495	12.0247	10.7247	15.2746	10.3997	21.1245	19.4995	23.0744	23.3994
1626	15.5996	19.8245	12.0247	11.0497	15.9246	10.0747	20.7995	19.1745	24.3744	23.7244
1627	15.5996	20.1495	12.0247	11.0497	15.9246	10.0747	21.1245	19.4995	23.7244	23.3994
1628	15.5996	19.4995	12.0247	11.0497	14.9496	10.3997	21.7745	19.4995	23.7244	23.7244
1629	15.5996	20.1495	12.0247	11.3747	15.5996	10.0747	22.0994	19.8245	23.3994	23.7244
1630	15.5996	20.1495	12.0247	11.0497	15.2746	10.3997	21.4495	19.4995	24.0494	23.0744
1631	15.5996	19.8245	12.0247	11.3747	15.9246	10.3997	21.7745	19.8245	24.0494	23.7244
1632	15.5996	20.1495	12.0247	10.7247	14.9496	10.0747	21.4495	19.8245	23.7244	23.0744
1633	15.5996	20.1495	12.0247	11.0497	15.2746	10.0747	21.1245	19.8245	23.7244	23.3994
1634	15.5996	20.1495	12.0247	11.0497	15.5996	10.7247	21.1245	19.8245	23.7244	23.3994
1635	15.5996	19.4995	12.0247	11.0497	15.9246	10.3997	21.7745	19.8245	23.7244	23.0744
1636	15.5996	19.8245	12.0247	11.3747	15.2746	10.3997	21.4495	19.8245	24.0494	23.7244
1637	15.5996	19.4995	12.3497	11.3747	15.5996	10.0747	21.4495	19.8245	23.7244	23.3994
1638	15.5996	19.8245	12.0247	11.0497	15.9246	10.0747	21.4495	19.1745	23.7244	23.7244
1639	15.5996	19.4995	12.0247	10.7247	15.5996	10.0747	21.7745	19.8245	23.7244	23.7244
1640	15.5996	19.8245	12.0247	11.3747	15.2746	10.3997	22.0994	19.8245	23.7244	23.7244
1641	15.5996	19.8245	12.0247	11.0497	15.2746	10.0747	21.4495	19.4995	24.0494	23.3994
1642	15.5996	19.8245	12.0247	10.7247	15.2746	10.0747	21.4495	19.8245	24.0494	23.7244
1643	15.5996	19.4995	11.6997	10.7247	14.9496	10.3997	21.7745	19.8245	23.7244	23.3994
1644	15.5996	19.8245	12.0247	10.7247	15.5996	10.3997	21.4495	19.4995	23.3994	23.3994
1645	15.5996	19.8245	12.0247	10.7247	15.5996	10.3997	21.4495	19.4995	24.0494	22.7494
1646	15.5996	19.8245	12.0247	10.7247	15.5996	10.3997	21.4495	19.8245	24.0494	23.3994
1647	15.5996	19.8245	12.0247	10.7247	15.9246	10.3997	21.4495	19.8245	24.0494	23.3994
1648	15.5996	19.4995	12.0247	11.0497	14.9496	10.3997	21.1245	19.8245	24.0494	23.7244
1649	15.5996	19.4995	12.0247	11.0497	15.2746	10.0747	21.1245	19.8245	24.3744	24.0494
1650	15.5996	19.4995	12.3497	10.7247	15.5996	10.3997	21.4495	19.8245	24.3744	23.0744
1651	15.5996	19.8245	12.0247	11.0497	15.2746	10.3997	21.1245	19.4995	23.7244	23.3994
1652	15.5996	19.4995	12.0247	10.7247	15.5996	10.3997	21.4495	19.8245	24.0494	23.3994
1653	15.5996	19.4995	12.0247	11.0497	15.2746	10.3997	20.7995	19.8245	24.6994	23.7244
1654	15.2746	19.4995	12.0247	11.0497	15.2746	10.3997	21.1245	19.4995	24.6994	23.3994
1655	15.5996	19.8245	12.0247	11.0497	15.5996	10.3997	21.1245	19.4995	23.7244	23.7244
1656	15.2746	19.4995	12.0247	10.7247	15.5996	10.3997	21.4495	19.8245	23.7244	23.7244
1657	15.2746	19.4995	12.0247	10.7247	15.2746	10.0747	21.4495	19.8245	24.0494	22.7494
1658	15.5996	19.4995	12.0247	10.7247	15.5996	10.3997	21.4495	19.8245	23.7244	23.3994
1659	15.9246	19.4995	12.0247	10.7247	15.5996	10.3997	21.4495	19.8245	24.3744	24.0494
1660	15.5996	19.4995	12.0247	10.7247	15.9246	10.3997	22.0994	19.4995	24.0494	23.7244
1661	15.5996	19.4995	12.0247	10.7247	15.5996	10.3997	21.7745	19.8245	24.0494	23.3994
1662	15.5996	18.8495	12.0247	10.7247	15.2746	10.3997	22.0994	19.8245	24.0494	24.0494
1663	15.5996	19.1745	12.0247	10.7247	15.2746	10.0747	21.4495	19.1745	23.7244	24.0494
1664	15.5996	19.4995	12.0247	10.7247	15.2746	10.3997	21.7745	19.8245	23.7244	23.7244
1665	15.5996	19.1745	12.3497	10.7247	14.9496	10.0747	21.1245	19.4995	24.3744	23.3994
1666	15.5996	19.1745	12.0247	10.7247	15.2746	10.0747	21.4495	19.8245	23.7244	23.3994
1667	15.5996	19.1745	12.0247	10.7247	15.5996	10.3997	21.4495	19.8245	23.7244	23.7244
1668	15.5996	19.1745	12.0247	11.0497	15.5996	10.3997	21.7745	19.8245	24.0494	23.7244
1669	15.2746	19.1745	12.0247	10.7247	15.2746	10.0747	21.1245	19.8245	23.7244	24.0494
1670	15.2746	19.1745	12.0247	10.7247	14.9496	10.3997	21.7745	19.8245	23.7244	23.3994
1671	15.5996	19.1745	12.0247	10.7247	15.2746	10.3997	21.4495	19.8245	23.7244	23.7244
1672	15.5996	19.8245	12.0247	10.7247	15.2746	10.0747	21.7745	20.1495	24.0494	23.7244
1673	15.2746	19.1745	12.0247	10.7247	15.2746	10.3997	21.1245	19.4995	23.7244	23.0744
1674	15.5996	19.1745	12.0247	10.7247	15.2746	10.3997	22.0994	19.4995	24.0494	23.7244
1675	15.5996	19.8245	12.0247	10.7247	15.5996	10.3997	21.7745	19.8245	23.7244	23.7244
1676	15.5996	19.1745	12.0247	10.7247	14.9496	10.0747	22.0994	19.4995	23.7244	23.3994
1677	15.5996	19.8245	12.0247	10.7247	15.5996	10.3997	21.7745	19.8245	23.0744	23.7244
1678	15.5996	19.1745	12.0247	10.7247	14.6246	10.3997	22.0994	19.8245	24.3744	24.0494
1679	15.5996	19.4995	12.0247	10.7247	14.9496	10.3997	21.7745	19.4995	24.3744	23.7244
1680	15.2746	19.4995	12.0247	10.7247	15.2746	10.3997	21.7745	19.4995	24.0494	23.7244
1681	15.2746	19.8245	12.0247	10.7247	15.5996	10.3997	21.4495	19.4995	23.7244	23.7244
1682	15.2746	19.4995	12.0247	11.0497	14.9496	10.3997	21.7745	19.8245	23.7244	24.0494
1683	15.2746	19.4995	12.0247	10.7247	14.6246	10.3997	21.7745	19.4995	24.0494	24.0494
1684	15.2746	19.4995	12.0247	10.7247	14.9496	10.3997	21.4495	19.8245	24.3744	23.3994
1685	15.2746	18.8495	12.0247	11.3747	15.2746	10.0747	21.7745	19.8245	24.0494	24.0494
1686	15.2746	19.1745	12.0247	11.3747	15.2746	10.3997	22.4244	19.4995	23.7244	24.0494
1687	15.2746	19.4995	12.0247	11.0497	14.9496	10.3997	21.4495	19.8245	23.7244	23.7244
1688	15.2746	19.4995	12.0247	11.0497	15.2746	10.3997	21.1245	19.4995	24.0494	24.3744
1689	15.2746	19.4995	12.0247	11.3747	15.5996	10.3997	21.1245	19.8245	23.7244	23.3994
1690	15.2746	19.4995	12.0247	11.3747	15.5996	10.3997	21.1245	19.8245	24.0494	24.0494
1691	15.2746	19.1745	12.0247	11.3747	15.9246	10.3997	21.1245	19.8245	24.0494	23.7244
1692	15.2746	19.4995	12.0247	11.0497	15.2746	10.3997	21.1245	19.8245	24.0494	24.0494
1693	15.2746	18.8495	12.0247	11.0497	15.2746	10.3997	21.4495	19.4995	23.3994	23.3994
1694	15.2746	18.8495	12.0247	11.0497	15.5996	10.3997	21.4495	20.1495	24.3744	23.7244
1695	15.2746	19.4995	12.0247	11.0497	15.2746	10.3997	21.4495	19.8245	24.3744	23.7244
1696	15.2746	19.4995	12.0247	11.3747	14.9496	10.0747	21.1245	19.8245	23.7244	23.7244
1697	15.2746	19.1745	12.0247	11.3747	15.2746	10.0747	21.1245	19.8245	23.3994	23.3994
1698	15.2746	19.1745	12.0247	11.0497	15.9246	10.3997	21.1245	19.8245	23.7244	23.3994
1699	15.2746	19.1745	12.0247	11.3747	15.2746	10.3997	21.1245	19.4995	24.0494	24.0494
1700	14.9496	19.1745	12.0247	11.0497	15.5996	10.3997	21.1245	19.1745	24.0494	23.7244
1701	15.2746	19.1745	12.0247	11.0497	15.2746	10.3997	21.1245	19.8245	23.7244	23.7244
1702	15.2746	19.1745	12.0247	11.0497	15.2746	10.3997	21.1245	19.4995	23.7244	24.0494
1703	15.2746	19.1745	12.0247	10.7247	15.2746	10.3997	21.1245	19.1745	23.7244	24.0494
1704	15.2746	19.4995	12.0247	10.7247	15.5996	10.0747	21.1245	19.8245	23.3994	23.7244
1705	15.2746	19.4995	12.0247	11.0497	14.9496	10.3997	21.7745	19.1745	24.0494	24.0494
1706	15.2746	19.4995	11.6997	10.7247	15.5996	10.3997	21.4495	19.4995	24.0494	23.7244
1707	15.2746	19.4995	11.6997	10.7247	14.6246	10.3997	21.4495	19.8245	23.7244	23.7244
1708	15.2746	18.8495	11.6997	10.7247	15.2746	10.3997	21.7745	19.8245	24.0494	23.7244
1709	15.2746	19.1745	12.0247	10.7247	15.5996	10.0747	21.4495	19.4995	24.0494	23.7244
1710	15.2746	18.8495	12.0247	10.7247	14.9496	10.3997	21.7745	19.4995	24.0494	23.7244
1711	15.2746	19.4995	12.0247	10.7247	15.9246	10.0747	21.4495	19.8245	23.7244	24.0494
1712	15.2746	19.4995	12.0247	10.7247	15.2746	10.3997	21.4495	19.8245	23.7244	23.3994
1713	15.2746	19.1745	12.0247	10.7247	15.5996	10.3997	21.7745	19.4995	23.7244	24.0494
1714	15.2746	19.4995	12.0247	11.0497	14.9496	10.0747	21.4495	19.4995	24.0494	24.3744
1715	15.2746	19.4995	12.0247	11.0497	15.2746	10.3997	21.4495	19.8245	24.0494	23.0744
1716	15.2746	18.8495	12.0247	11.0497	15.2746	10.3997	21.7745	19.1745	24.0494	23.3994
1717	15.2746	19.1745	12.0247	10.7247	15.2746	10.0747	21.4495	19.8245	24.0494	23.7244
1718	15.2746	19.8245	12.0247	10.7247	14.9496	10.3997	21.4495	19.4995	24.0494	24.0494
1719	15.2746	18.8495	12.0247	11.0497	15.2746	10.0747	21.4495	19.4995	24.0494	23.3994
1720	15.2746	19.1745	12.0247	11.0497	15.2746	10.0747	21.4495	19.1745	23.7244	24.0494
1721	15.2746	19.1745	12.0247	10.7247	15.2746	10.3997	21.4495	19.4995	24.3744	23.3994
1722	15.2746	19.4995	12.0247	10.7247	15.2746	10.3997	21.4495	19.4995	23.7244	23.7244
1723	15.2746	18.8495	12.0247	11.0497	15.2746	10.3997	21.4495	19.4995	24.0494	23.3994
1724	15.2746	19.4995	12.0247	11.0497	14.6246	10.3997	20.7995	19.4995	24.0494	24.0494
1725	15.2746	19.1745	12.0247	11.0497	15.2746	10.3997	21.1245	19.8245	24.3744	23.7244
1726	15.2746	19.1745	12.0247	11.0497	15.5996	10.3997	21.1245	19.4995	24.3744	24.3744
1727	15.2746	18.8495	12.0247	11.0497	15.2746	10.3997	21.4495	19.4995	23.3994	23.7244
1728	14.9496	18.8495	12.0247	11.3747	14.9496	10.3997	21.1245	19.8245	24.0494	23.7244
1729	14.9496	18.8495	12.3497	11.3747	15.2746	10.3997	21.7745	19.4995	23.7244	23.7244
1730	14.9496	19.1745	12.0247	11.0497	15.5996	10.3997	21.1245	19.8245	23.7244	23.0744
1731	15.2746	19.4995	12.0247	11.0497	14.9496	10.3997	21.1245	19.8245	24.0494	23.3994
1732	15.2746	19.1745	12.0247	11.3747	15.5996	10.3997	20.7995	19.8245	24.0494	24.0494
1733	15.2746	19.8245	12.0247	11.0497	15.2746	10.3997	21.4495	19.4995	24.3744	23.7244
1734	15.2746	19.1745	12.0247	11.0497	15.5996	10.3997	21.4495	19.1745	24.0494	23.7244
1735	14.9496	19.4995	12.3497	11.0497	14.9496	10.3997	21.4495	19.1745	23.7244	24.0494
1736	15.2746	19.1745	12.3497	11.0497	15.2746	10.3997	21.7745	19.4995	23.7244	24.0494
1737	14.9496	19.4995	12.0247	11.3747	15.2746	10.3997	21.4495	19.4995	24.0494	23.7244
1738	15.2746	19.1745	12.3497	11.3747	14.9496	10.3997	21.4495	19.4995	24.0494	23.3994
1739	15.2746	19.1745	12.3497	11.0497	14.6246	10.3997	21.7745	19.8245	24.0494	24.0494
1740	15.2746	18.8495	12.3497	11.3747	15.2746	10.3997	21.4495	19.4995	24.3744	23.3994
1741	15.2746	19.1745	12.0247	11.3747	14.6246	10.3997	21.4495	19.8245	23.7244	23.7244
1742	15.2746	19.1745	12.0247	11.0497	14.9496	10.3997	21.4495	19.4995	23.7244	24.0494
1743	15.2746	19.1745	12.0247	11.0497	14.9496	10.3997	21.4495	19.4995	23.7244	23.3994
1744	15.2746	19.4995	12.3497	11.0497	15.5996	10.3997	21.7745	19.4995	24.0494	23.7244
1745	14.9496	19.1745	12.3497	10.7247	16.5746	10.3997	21.7745	19.8245	23.7244	23.7244
1746	14.9496	19.8245	12.3497	11.0497	15.9246	10.3997	21.1245	19.4995	24.0494	24.0494
1747	14.9496	19.4995	12.0247	11.0497	14.6246	10.3997	21.7745	19.8245	24.0494	24.3744
1748	14.9496	19.1745	12.3497	11.0497	14.9496	10.3997	21.1245	19.4995	23.7244	23.3994
1749	14.9496	18.5245	12.3497	11.3747	15.5996	10.3997	21.1245	19.4995	23.7244	23.3994
1750	14.9496	19.4995	12.3497	11.0497	14.6246	10.3997	21.4495	19.4995	23.3994	24.0494
1751	14.9496	18.8495	12.0247	10.7247	14.6246	10.3997	21.7745	19.1745	24.0494	23.7244
1752	14.9496	19.4995	12.0247	11.0497	14.9496	10.3997	21.7745	19.8245	23.7244	24.3744
1753	14.9496	19.4995	12.0247	11.3747	15.5996	10.3997	21.4495	19.4995	24.3744	23.7244
1754	14.9496	19.4995	12.3497	11.0497	15.5996	10.3997	21.7745	19.4995	24.0494	24.0494
1755	14.9496	19.1745	12.0247	11.0497	15.2746	10.3997	21.4495	19.4995	23.3994	23.7244
1756	14.9496	19.1745	12.0247	11.0497	15.2746	10.0747	21.7745	19.8245	23.7244	24.3744
1757	14.9496	19.1745	12.0247	11.3747	15.2746	10.3997	21.7745	19.4995	23.7244	24.0494
1758	14.9496	18.8495	12.0247	11.3747	15.2746	10.3997	21.4495	19.8245	23.7244	23.3994
1759	14.9496	18.8495	12.0247	10.7247	15.5996	10.3997	21.7745	19.8245	23.7244	23.7244
1760	14.9496	19.1745	12.0247	10.7247	14.9496	10.3997	21.1245	19.4995	23.7244	23.7244
1761	14.9496	19.1745	12.3497	10.7247	14.6246	10.3997	21.4495	19.8245	23.7244	23.3994
1762	14.9496	18.8495	12.0247	11.0497	14.9496	10.3997	21.4495	19.4995	24.3744	23.7244
1763	14.9496	19.1745	12.0247	11.0497	15.2746	10.3997	21.1245	19.8245	23.3994	23.7244
1764	14.9496	19.4995	12.3497	11.0497	14.9496	10.0747	21.7745	19.8245	24.0494	23.0744
1765	15.2746	19.1745	12.3497	11.0497	15.2746	10.3997	21.7745	19.8245	24.0494	23.7244
1766	14.9496	18.8495	12.0247	11.0497	15.9246	10.3997	21.4495	19.8245	24.3744	24.0494
1767	15.2746	19.1745	12.3497	11.0497	14.9496	10.3997	21.1245	19.4995	24.0494	24.0494
1768	15.2746	18.8495	12.3497	11.0497	15.5996	10.3997	21.4495	19.8245	24.3744	24.0494
1769	15.2746	19.1745	12.3497	11.0497	15.5996	10.3997	21.4495	19.8245	24.0494	24.3744
1770	15.2746	19.4995	12.3497	11.0497	15.5996	10.3997	21.4495	19.4995	24.0494	23.3994
1771	15.2746	19.1745	12.0247	11.0497	15.2746	10.3997	21.7745	19.4995	23.7244	24.0494
1772	15.2746	19.1745	12.3497	11.3747	14.9496	10.3997	21.4495	19.8245	23.3994	23.7244
1773	15.2746	19.1745	12.0247	11.3747	14.6246	10.3997	21.4495	19.8245	23.7244	24.0494
1774	14.9496	19.4995	12.3497	11.0497	14.6246	10.3997	21.7745	19.4995	24.0494	24.3744
1775	14.9496	19.1745	12.3497	11.0497	14.9496	10.3997	21.7745	19.8245	24.0494	24.0494
1776	14.9496	19.8245	12.3497	11.0497	14.9496	10.3997	21.4495	19.4995	24.0494	23.7244
1777	15.2746	19.4995	12.3497	11.0497	15.2746	10.3997	22.0994	19.8245	24.0494	23.7244
1778	15.2746	18.8495	12.3497	11.0497	14.9496	10.3997	21.4495	19.4995	24.0494	24.0494
1779	15.2746	19.8245	12.3497	11.0497	14.6246	10.3997	21.7745	19.8245	24.0494	23.7244
1780	15.2746	19.1745	12.3497	11.0497	15.2746	10.3997	21.7745	19.8245	24.0494	24.0494
1781	14.9496	18.8495	12.0247	11.3747	14.9496	10.3997	21.7745	19.4995	23.7244	24.0494
1782	14.9496	19.1745	12.3497	11.0497	15.2746	10.3997	22.0994	19.4995	24.3744	23.7244
1783	15.2746	18.8495	12.3497	11.0497	14.9496	10.3997	22.0994	19.8245	24.0494	23.7244
1784	15.2746	19.4995	12.3497	10.7247	15.2746	10.3997	21.7745	19.8245	24.0494	24.0494
1785	15.2746	19.8245	12.3497	11.0497	15.2746	10.3997	22.0994	19.8245	24.0494	24.0494
1786	14.9496	19.4995	12.3497	11.0497	14.9496	10.3997	22.0994	19.8245	24.0494	23.7244
1787	14.9496	19.1745	12.3497	11.0497	15.2746	10.3997	21.7745	19.8245	23.7244	23.7244
1788	15.2746	18.8495	12.0247	11.0497	15.2746	10.3997	22.0994	19.8245	24.0494	23.7244
1789	15.2746	19.4995	12.3497	10.7247	15.2746	10.3997	22.0994	19.8245	24.0494	23.3994
1790	15.2746	19.4995	12.3497	10.7247	14.9496	10.3997	22.0994	19.4995	24.0494	23.7244
1791	15.2746	19.1745	12.0247	10.7247	14.6246	10.3997	21.7745	19.4995	24.3744	24.0494
1792	14.9496	19.8245	12.0247	10.7247	15.2746	10.3997	21.7745	19.4995	24.3744	23.7244
1793	14.9496	19.1745	12.0247	10.7247	14.6246	10.3997	21.7745	19.8245	24.3744	24.0494
1794	14.9496	18.8495	12.3497	11.0497	14.9496	10.3997	21.7745	19.8245	24.0494	23.7244
1795	14.9496	19.4995	12.3497	10.7247	15.2746	10.0747	21.4495	19.8245	23.7244	23.7244
1796	15.2746	19.4995	12.3497	11.0497	15.2746	10.3997	22.0994	19.8245	23.7244	24.0494
1797	15.2746	19.1745	12.3497	10.7247	14.6246	10.3997	22.0994	19.8245	24.0494	24.3744
1798	15.2746	19.1745	12.3497	10.7247	14.9496	10.3997	21.7745	19.4995	24.0494	24.3744
1799	15.2746	19.4995	12.3497	10.7247	15.2746	10.3997	21.7745	19.8245	24.0494	23.0744
	BGBV-132_0000	BGBV-138_0000	BGBV-278_0001	BGBV-279_0001	BGBV-281_0001	BGBV-282_0001	BGBV-284_0001	BGBV-415_0001	BGBV-416_0001	BGBV-418_0001
Pulse	10s;20hz;5ms	10s;20hz;5ms	10s;20hz;5ms	10s;20hz;5ms	10s;20hz;5ms	10s;20hz;5ms	10s;20hz;5ms	10s;20hz;5ms	10s;20hz;5ms	10s;20hz;5ms
LED	0.1	0.1	0.1	0.1	0.1	0.1	0.1	0.1	0.1	0.1
Layer	I	I	I	I	I	I	I
Max significant consecutive (ctrl)
Min (ctrl)	15.5996	19.1745	10.7247	10.3997	15.2746	10.0747	20.1495	20.1495	25.0244	22.4244
Max (ctrl)	15.9246	19.4995	11.3747	11.6997	16.2496	10.7247	20.7995	20.1495	25.9994	23.3994
Mean (ctrl)	15.652	19.4366	11.2804	10.9659	15.7044	10.3473	20.4955	20.1495	25.601	23.0744
sd (ctrl)	0.121507	0.13052	0.171837	0.302175	0.228068	0.169843	0.143769	3.61144e-15	0.232994	0.290682
1.960*sd	0.238154	0.255819	0.336801	0.592264	0.447013	0.332892	0.281788	7.07842e-15	0.456668	0.569736
2.576*sd	0.313003	0.336219	0.442653	0.778404	0.587502	0.437516	0.37035	9.30307e-15	0.600193	0.748796
t0 (Opto)	18	18	18	18	18	18	18	18	18	18
CV	0.00776304	0.00671516	0.0152333	0.027556	0.0145225	0.0164142	0.0070147	1.79232e-16	0.00910099	0.0125976
Magnitude (4 pt)
Onset (5 pt)
Magnitude (5 pt)
Onset (6 pt)
Magnitude (6 pt)
Initial contaction (4pt)
Initial contaction (5pt)
Initial contaction (6pt)
Dilation (4pt)
Max-dilatation	16.8996	20.7995	12.3497	12.6747	16.5746	10.7247	22.4244
Max-contraction	14.2996	18.5245	10.7247	9.42476	14.2996	9.74976	19.8245
t Max-contraction
AUC 0-2
AUC 2-4
AUC 4-6
AUC 6-8
AUC 8-10
Contraction K+
Sexe	Mâle	Mâle
Age	18	17

## Sheet: SC560
Stimulation
Time	BGBV-356_0001	BGBV-366_0001	BGBV-367_0001	BGBV-368_0001	BGBV-370_0001	BGBV-371_0001	BGBV-372_0001	BGBV-431_0001	BGBV-432_0001	BGBV-433_0001
0	17.2246	16.2496	29.2493	15.5996	35.0991	14.9496	26.3243	12.6747	13.6497	15.9246
1	16.8996	16.2496	29.2493	15.9246	35.7491	15.5996	25.9994	12.3497	13.9747	15.9246
2	16.8996	16.2496	29.5743	15.5996	35.4241	15.2746	25.9994	12.0247	13.6497	16.2496
3	16.8996	16.2496	29.2493	15.5996	36.0741	15.5996	25.9994	12.9997	13.6497	16.5746
4	17.2246	16.2496	29.5743	15.5996	35.7491	15.2746	25.9994	12.6747	13.9747	16.2496
5	17.2246	16.2496	29.5743	15.2746	35.4241	15.2746	25.9994	12.3497	14.2996	16.2496
6	17.2246	16.2496	29.2493	15.2746	35.4241	15.2746	25.9994	12.3497	13.9747	16.2496
7	16.8996	16.2496	29.2493	15.2746	35.4241	15.2746	25.9994	12.0247	13.9747	16.2496
8	16.8996	16.2496	29.5743	15.5996	35.4241	15.2746	25.9994	12.6747	14.2996	16.2496
9	16.8996	16.2496	29.5743	15.5996	35.4241	14.9496	25.9994	12.6747	13.9747	16.2496
10	16.8996	16.2496	29.2493	15.5996	35.4241	15.5996	25.9994	12.9997	13.6497	16.2496
11	17.2246	16.2496	29.5743	15.2746	35.4241	15.2746	25.9994	12.3497	13.6497	16.2496
12	16.8996	16.2496	29.5743	15.5996	35.7491	15.2746	25.6744	12.3497	13.9747	16.2496
13	16.5746	16.2496	29.2493	15.5996	35.7491	15.2746	25.9994	12.6747	13.9747	15.9246
14	16.8996	16.2496	29.2493	15.5996	35.4241	15.2746	25.9994	12.3497	13.6497	16.2496
15	16.5746	16.2496	29.2493	15.5996	35.4241	15.5996	25.9994	12.3497	13.9747	15.9246
16	16.8996	16.2496	29.2493	15.5996	35.7491	15.2746	25.9994	12.3497	13.9747	16.2496
17	16.8996	16.2496	29.5743	15.9246	35.4241	15.2746	25.9994	12.3497	13.9747	15.9246
18	16.8996	16.2496	29.2493	15.2746	35.7491	14.9496	25.6744	12.3497	13.6497	16.2496
19	17.5496	16.5746	29.5743	15.5996	35.4241	15.2746	25.3494	12.6747	13.6497	15.9246
20	16.8996	16.2496	29.5743	15.2746	35.7491	15.2746	25.6744	12.6747	13.6497	16.5746
21	16.8996	16.2496	29.5743	15.5996	35.4241	14.9496	25.9994	12.3497	14.2996	16.2496
22	17.5496	16.2496	29.5743	15.5996	35.4241	15.2746	25.9994	12.6747	14.2996	15.9246
23	16.8996	16.2496	29.2493	15.2746	35.4241	14.9496	25.6744	12.6747	13.9747	16.2496
24	17.5496	16.2496	29.5743	15.5996	35.7491	15.5996	25.9994	12.0247	13.9747	15.9246
25	17.2246	16.2496	29.2493	15.5996	35.7491	15.2746	25.9994	12.3497	14.2996	16.2496
26	17.5496	16.2496	29.2493	15.5996	35.7491	14.9496	25.9994	12.0247	14.2996	16.2496
27	17.5496	16.2496	29.2493	15.5996	35.4241	15.2746	25.9994	12.9997	13.9747	16.2496
28	17.5496	16.2496	29.5743	15.5996	35.4241	14.9496	25.9994	12.9997	13.9747	16.2496
29	17.2246	16.2496	29.2493	15.5996	36.0741	14.9496	25.9994	12.9997	14.2996	16.2496
30	17.2246	16.2496	29.5743	15.5996	35.7491	14.9496	25.9994	12.3497	14.2996	16.2496
31	16.8996	16.2496	29.5743	15.5996	35.7491	15.2746	25.9994	12.3497	14.2996	15.9246
32	16.8996	16.5746	29.5743	15.2746	35.4241	15.2746	25.6744	12.6747	13.9747	16.2496
33	17.2246	16.2496	29.5743	15.2746	35.4241	14.9496	25.6744	12.6747	14.2996	15.5996
34	17.2246	16.2496	29.5743	15.2746	35.7491	15.2746	25.6744	12.3497	14.2996	15.9246
35	17.2246	16.2496	29.2493	15.2746	35.4241	15.2746	25.6744	12.6747	14.2996	15.9246
36	17.5496	16.2496	29.5743	15.2746	35.4241	14.9496	25.6744	12.3497	14.2996	16.2496
37	17.2246	16.5746	29.2493	15.5996	35.7491	15.2746	25.6744	12.3497	14.2996	15.9246
38	17.5496	16.2496	29.5743	15.5996	35.7491	14.9496	25.6744	12.3497	14.6246	15.9246
39	17.5496	16.5746	29.2493	15.9246	35.4241	14.9496	25.6744	12.0247	14.2996	15.9246
40	16.8996	16.5746	29.2493	15.5996	35.4241	14.6246	25.6744	12.0247	14.2996	15.9246
41	17.2246	16.2496	29.5743	15.5996	35.7491	14.6246	25.6744	12.3497	13.9747	15.9246
42	17.2246	16.5746	29.5743	15.5996	35.4241	14.9496	25.6744	12.3497	14.6246	15.9246
43	17.5496	16.5746	29.2493	15.5996	35.4241	15.5996	25.6744	12.3497	14.2996	16.2496
44	17.2246	16.5746	29.2493	15.5996	35.4241	15.2746	25.6744	12.3497	14.2996	15.9246
45	17.5496	16.5746	29.5743	15.5996	35.4241	14.9496	25.6744	11.6997	14.2996	15.9246
46	17.5496	16.5746	29.2493	15.9246	35.4241	15.2746	25.6744	12.3497	13.9747	16.8996
47	17.2246	16.5746	29.2493	15.9246	35.4241	15.2746	25.6744	12.3497	14.2996	15.9246
48	17.2246	16.2496	29.5743	15.9246	35.4241	15.2746	25.6744	12.6747	13.9747	16.8996
49	17.2246	16.5746	29.2493	15.9246	35.4241	15.2746	25.6744	12.0247	14.2996	16.2496
50	17.2246	16.5746	29.2493	15.9246	35.4241	15.2746	25.6744	12.3497	14.2996	16.5746
51	17.2246	16.2496	29.2493	15.5996	35.0991	15.2746	25.6744	12.3497	13.9747	16.2496
52	17.2246	16.5746	29.2493	15.5996	35.4241	15.2746	25.6744	12.3497	13.9747	16.2496
53	17.2246	16.5746	29.2493	15.5996	35.4241	14.9496	25.3494	12.0247	13.9747	16.2496
54	17.5496	16.5746	29.2493	15.9246	35.7491	14.9496	25.3494	12.0247	13.9747	16.2496
55	17.2246	16.5746	29.2493	15.9246	35.4241	15.2746	25.6744	11.6997	13.6497	16.2496
56	17.5496	16.2496	29.2493	15.9246	35.0991	15.2746	25.6744	12.0247	13.9747	16.2496
57	17.2246	16.5746	29.2493	15.5996	35.0991	15.2746	25.6744	12.3497	13.9747	15.9246
58	17.5496	16.2496	29.2493	15.5996	35.4241	14.9496	25.6744	12.3497	13.9747	16.2496
59	17.5496	16.2496	29.5743	15.9246	35.0991	14.9496	25.6744	12.3497	14.2996	16.5746
60	17.2246	16.2496	29.2493	15.9246	35.4241	14.9496	25.6744	12.6747	14.2996	16.2496
61	17.2246	16.2496	29.5743	15.9246	35.4241	15.2746	25.9994	12.3497	13.9747	16.2496
62	17.5496	16.5746	29.2493	15.9246	35.7491	15.2746	25.3494	12.0247	13.9747	16.5746
63	17.2246	16.5746	29.2493	15.9246	35.0991	14.9496	25.6744	12.3497	13.6497	16.2496
64	17.2246	16.5746	29.5743	15.9246	35.0991	15.2746	25.6744	12.0247	13.9747	16.5746
65	17.5496	16.2496	29.2493	15.9246	35.0991	15.5996	25.6744	11.6997	13.9747	16.8996
66	17.5496	16.5746	29.5743	15.9246	35.4241	15.2746	25.6744	12.3497	14.2996	16.8996
67	17.2246	16.5746	29.5743	15.9246	34.7741	15.2746	25.3494	11.3747	13.6497	16.5746
68	17.5496	16.5746	29.2493	15.9246	35.4241	15.5996	25.6744	12.0247	13.3247	16.8996
69	17.2246	16.2496	29.8993	15.9246	35.4241	15.2746	25.6744	12.0247	13.6497	15.9246
70	16.8996	16.2496	29.2493	15.9246	35.7491	14.9496	25.6744	12.3497	13.6497	15.9246
71	17.5496	16.5746	29.8993	15.9246	35.4241	15.2746	25.6744	12.3497	13.6497	15.9246
72	17.2246	16.2496	29.5743	15.9246	35.4241	15.2746	25.6744	12.3497	12.6747	16.2496
73	17.5496	16.2496	29.5743	15.9246	35.0991	15.5996	25.6744	12.0247	13.6497	16.2496
74	16.8996	16.2496	29.5743	15.5996	35.4241	15.2746	25.3494	12.3497	13.3247	16.2496
75	17.5496	16.2496	29.8993	15.9246	35.0991	15.5996	25.6744	12.6747	13.6497	16.5746
76	17.2246	16.2496	29.2493	15.9246	35.4241	15.2746	25.6744	12.0247	13.3247	16.2496
77	17.2246	16.2496	29.5743	15.5996	35.0991	15.2746	25.3494	12.3497	13.3247	16.2496
78	16.8996	16.2496	29.5743	15.9246	35.4241	15.2746	25.6744	12.3497	13.3247	16.2496
79	17.2246	16.2496	29.5743	15.5996	35.4241	15.2746	25.6744	12.0247	12.9997	16.2496
80	17.5496	16.2496	29.5743	15.9246	35.4241	14.9496	25.3494	11.3747	12.9997	16.2496
81	17.2246	16.5746	29.8993	15.9246	35.4241	14.6246	25.3494	12.0247	12.6747	15.9246
82	17.2246	16.2496	29.5743	15.5996	35.0991	14.9496	25.6744	12.0247	12.6747	16.2496
83	16.8996	16.2496	29.8993	15.9246	35.0991	14.9496	25.6744	12.0247	12.3497	16.2496
84	16.8996	16.2496	29.5743	15.9246	35.0991	15.2746	25.6744	12.0247	12.9997	15.9246
85	16.8996	16.2496	29.5743	15.9246	35.4241	15.2746	25.6744	12.0247	13.6497	15.5996
86	17.2246	16.2496	29.8993	15.9246	35.0991	15.2746	25.3494	12.3497	13.3247	15.2746
87	17.5496	16.2496	29.8993	15.5996	35.4241	15.2746	25.6744	11.6997	12.9997	15.9246
88	16.8996	16.2496	29.5743	15.5996	35.7491	14.9496	25.6744	11.6997	12.9997	16.2496
89	17.5496	16.5746	29.8993	15.5996	35.4241	15.2746	25.6744	12.0247	12.9997	15.5996
90	17.2246	16.5746	29.8993	15.2746	35.4241	15.2746	25.6744	12.3497	12.9997	15.9246
91	17.5496	16.2496	29.5743	15.5996	35.0991	14.6246	25.6744	12.3497	13.3247	15.9246
92	17.2246	16.2496	29.8993	15.9246	35.7491	15.2746	25.6744	12.3497	12.9997	16.5746
93	17.5496	16.2496	29.8993	15.9246	35.0991	14.9496	25.6744	12.3497	12.6747	16.2496
94	16.8996	16.5746	29.8993	15.2746	35.0991	15.2746	25.6744	11.6997	12.9997	16.2496
95	17.5496	16.2496	29.8993	15.5996	35.4241	14.9496	25.6744	11.6997	13.6497	16.2496
96	17.2246	16.5746	29.8993	15.5996	34.7741	15.2746	25.6744	11.6997	12.9997	16.2496
97	17.2246	16.5746	29.8993	15.5996	35.0991	15.2746	25.6744	11.6997	12.6747	15.9246
98	17.5496	16.5746	30.2242	15.5996	35.0991	15.2746	25.6744	11.3747	12.6747	16.2496
99	17.2246	16.2496	30.2242	15.5996	35.4241	15.2746	25.0244	11.6997	12.6747	16.5746
100	17.5496	16.5746	30.2242	15.5996	35.0991	15.2746	25.6744	11.3747	12.6747	15.9246
101	17.5496	16.2496	30.2242	15.9246	35.0991	15.2746	25.3494	11.6997	12.6747	15.9246
102	17.2246	16.5746	29.8993	15.2746	35.0991	15.2746	25.0244	11.3747	12.6747	16.2496
103	17.2246	16.5746	29.8993	15.5996	35.0991	15.5996	25.3494	12.0247	12.3497	15.9246
104	17.5496	16.5746	30.2242	15.9246	35.0991	15.2746	25.6744	11.3747	11.6997	15.9246
105	17.5496	16.5746	29.8993	15.5996	35.4241	15.2746	25.6744	11.3747	12.3497	16.2496
106	17.2246	16.5746	29.8993	15.5996	35.4241	15.2746	25.6744	11.6997	12.0247	16.2496
107	17.5496	16.5746	30.2242	15.5996	35.0991	15.2746	25.3494	12.0247	12.3497	16.2496
108	17.5496	16.2496	30.2242	15.2746	35.0991	15.2746	25.0244	11.0497	12.0247	15.9246
109	17.5496	16.5746	30.2242	15.5996	35.4241	15.2746	25.3494	12.0247	12.0247	15.9246
110	17.2246	16.2496	30.2242	15.5996	35.4241	15.5996	25.6744	11.0497	12.9997	15.9246
111	17.2246	16.5746	30.2242	15.5996	35.4241	15.2746	25.6744	11.3747	12.9997	15.9246
112	17.2246	16.5746	30.2242	15.5996	35.0991	15.2746	25.6744	11.0497	12.3497	15.9246
113	17.2246	16.5746	30.2242	15.5996	35.4241	14.9496	25.6744	11.3747	12.6747	16.2496
114	17.2246	16.2496	30.2242	15.5996	35.0991	15.2746	25.6744	11.0497	12.6747	16.2496
115	17.2246	16.2496	29.8993	15.5996	35.0991	15.2746	25.0244	11.3747	12.6747	15.9246
116	17.2246	16.2496	30.2242	15.5996	35.4241	14.9496	25.3494	11.0497	12.6747	15.9246
117	17.2246	16.2496	30.2242	15.2746	35.7491	15.2746	25.3494	11.6997	12.6747	15.9246
118	17.2246	16.5746	30.2242	15.5996	35.0991	15.2746	25.6744	11.0497	12.6747	15.9246
119	17.2246	16.2496	29.8993	15.5996	35.4241	15.2746	25.3494	11.0497	12.9997	16.2496
120	17.2246	16.2496	30.5492	15.5996	34.7741	15.2746	25.6744	11.0497	12.9997	15.9246
121	17.2246	16.2496	30.2242	15.5996	35.0991	15.2746	25.0244	11.3747	12.6747	15.9246
122	17.2246	16.2496	30.2242	15.5996	35.0991	15.5996	25.6744	11.0497	12.9997	16.2496
123	16.8996	16.5746	29.8993	15.5996	35.0991	15.2746	25.6744	11.0497	12.9997	15.9246
124	17.2246	16.5746	30.2242	15.2746	34.7741	15.2746	25.9994	10.7247	13.3247	16.2496
125	16.8996	16.2496	30.2242	15.5996	34.7741	15.2746	25.6744	10.7247	12.9997	15.9246
126	17.2246	16.5746	30.5492	15.5996	34.7741	15.2746	25.3494	11.6997	12.6747	16.2496
127	17.2246	16.5746	30.5492	15.2746	35.0991	15.2746	25.0244	11.0497	12.9997	16.2496
128	17.2246	16.2496	30.2242	15.2746	34.7741	15.2746	25.3494	11.3747	13.3247	16.2496
129	17.2246	16.2496	30.5492	15.5996	35.4241	15.2746	25.3494	11.6997	13.3247	15.9246
130	17.2246	16.2496	30.5492	15.5996	34.7741	15.5996	25.6744	11.0497	13.3247	16.2496
131	17.2246	16.2496	30.5492	15.5996	35.0991	15.2746	25.6744	11.3747	12.9997	16.2496
132	17.5496	16.5746	30.5492	15.5996	35.0991	15.2746	25.6744	11.3747	13.3247	16.2496
133	17.2246	16.2496	29.8993	15.5996	35.0991	15.9246	25.6744	11.6997	13.3247	15.9246
134	16.8996	16.5746	30.5492	15.2746	35.0991	15.2746	25.6744	11.3747	13.3247	15.9246
135	17.2246	16.2496	30.2242	15.2746	35.0991	14.9496	25.6744	11.3747	13.3247	16.2496
136	17.2246	16.2496	30.2242	15.2746	34.7741	15.2746	25.6744	10.7247	12.9997	16.2496
137	16.8996	16.2496	29.8993	15.2746	35.0991	15.5996	25.6744	11.3747	12.9997	15.9246
138	17.2246	16.5746	30.2242	15.2746	34.7741	15.2746	25.6744	12.0247	13.6497	16.2496
139	17.2246	16.5746	30.2242	15.2746	35.0991	14.9496	25.6744	11.0497	12.9997	16.2496
140	17.5496	16.2496	30.5492	15.2746	35.0991	15.2746	25.0244	11.6997	13.3247	15.9246
141	17.2246	16.5746	29.8993	15.2746	34.7741	15.2746	25.3494	11.3747	13.3247	16.5746
142	17.2246	16.5746	30.5492	15.2746	34.7741	15.5996	25.6744	11.6997	13.3247	16.2496
143	17.2246	16.2496	30.5492	15.2746	35.4241	15.5996	25.6744	11.6997	12.9997	15.9246
144	17.2246	16.2496	30.2242	15.2746	35.0991	15.2746	25.6744	11.0497	13.3247	15.9246
145	17.2246	16.2496	30.5492	15.2746	34.7741	15.2746	25.3494	11.6997	12.9997	16.2496
146	17.2246	16.5746	30.5492	15.2746	34.7741	15.5996	25.6744	11.3747	12.6747	15.9246
147	17.2246	16.5746	30.5492	15.2746	34.7741	14.9496	25.6744	10.7247	12.9997	15.9246
148	17.5496	16.2496	30.2242	15.5996	35.4241	15.2746	25.6744	12.0247	12.6747	16.2496
149	17.2246	16.5746	30.2242	15.2746	34.7741	15.5996	25.6744	11.0497	12.3497	15.9246
150	17.2246	16.2496	30.2242	15.2746	35.4241	15.2746	25.3494	11.0497	12.3497	16.2496
151	17.5496	16.2496	30.2242	15.2746	35.0991	15.2746	25.6744	11.0497	12.0247	16.2496
152	16.8996	16.5746	30.5492	15.2746	35.0991	15.2746	25.3494	11.0497	12.0247	16.2496
153	17.2246	16.2496	30.5492	15.2746	34.7741	15.2746	25.6744	11.3747	12.3497	15.5996
154	17.2246	16.2496	30.2242	14.9496	35.0991	15.2746	25.6744	10.7247	12.3497	15.5996
155	17.2246	16.5746	30.2242	15.2746	34.7741	15.2746	25.6744	10.7247	12.3497	15.5996
156	17.2246	16.5746	30.5492	15.2746	35.0991	15.2746	25.6744	11.3747	12.3497	15.9246
157	17.2246	16.2496	30.5492	15.2746	34.7741	15.2746	25.3494	11.3747	12.0247	15.9246
158	17.2246	16.2496	30.2242	15.2746	35.0991	15.2746	25.6744	12.0247	12.0247	16.2496
159	17.2246	16.2496	30.2242	15.2746	34.7741	14.9496	25.3494	11.0497	12.6747	15.9246
160	17.2246	16.2496	30.5492	15.2746	35.0991	15.2746	25.3494	11.0497	12.3497	15.5996
161	17.2246	16.2496	30.5492	14.9496	35.0991	15.2746	25.6744	10.7247	12.3497	15.5996
162	17.2246	16.5746	30.2242	15.2746	35.0991	14.9496	25.3494	10.7247	12.6747	15.9246
163	17.5496	16.5746	30.2242	15.2746	34.7741	15.2746	25.6744	10.7247	12.3497	15.9246
164	17.2246	16.2496	30.5492	15.2746	35.0991	14.9496	25.6744	10.7247	12.3497	15.9246
165	16.8996	16.2496	30.2242	15.2746	35.0991	15.5996	25.3494	11.3747	12.3497	15.9246
166	17.2246	16.2496	30.5492	15.2746	34.7741	15.2746	25.3494	10.7247	12.3497	15.5996
167	17.2246	16.2496	30.2242	15.2746	35.0991	14.9496	25.3494	10.7247	12.3497	15.9246
168	17.2246	16.2496	30.5492	15.2746	35.0991	15.2746	25.6744	11.3747	12.6747	15.5996
169	17.2246	16.5746	30.2242	14.9496	35.0991	15.2746	25.6744	11.6997	12.6747	15.5996
170	16.8996	16.2496	30.2242	15.2746	35.0991	15.2746	25.6744	11.3747	12.3497	15.5996
171	17.2246	16.2496	29.8993	15.2746	35.0991	15.2746	25.6744	11.3747	12.6747	15.9246
172	17.2246	16.2496	30.2242	14.9496	34.7741	15.2746	25.6744	11.6997	12.6747	15.5996
173	17.2246	16.2496	29.8993	15.2746	34.7741	15.2746	25.6744	11.3747	12.6747	15.5996
174	17.2246	16.2496	30.2242	14.9496	35.0991	15.2746	25.6744	11.3747	12.9997	15.5996
175	17.2246	16.2496	30.2242	14.9496	35.0991	15.2746	25.6744	11.3747	12.6747	15.2746
176	16.8996	16.2496	30.2242	14.9496	34.7741	15.2746	25.6744	11.3747	12.3497	15.5996
177	17.2246	16.2496	30.5492	14.9496	35.0991	15.2746	25.6744	10.7247	12.6747	15.5996
178	17.2246	16.2496	30.2242	14.9496	35.0991	14.9496	25.3494	11.6997	12.6747	15.9246
179	17.5496	16.2496	30.2242	14.6246	35.0991	15.2746	25.6744	12.0247	12.6747	15.2746
180	17.2246	16.2496	30.2242	14.6246	35.0991	14.9496	25.6744	10.7247	12.6747	15.5996
181	17.2246	16.2496	30.2242	14.6246	35.0991	14.9496	25.6744	10.7247	12.6747	15.9246
182	17.2246	16.2496	30.2242	14.9496	34.7741	15.2746	25.6744	11.0497	12.6747	15.5996
183	16.8996	16.2496	30.2242	14.9496	34.7741	14.9496	25.6744	11.3747	12.9997	15.5996
184	16.8996	16.2496	30.2242	14.6246	34.7741	15.2746	25.6744	11.6997	12.9997	15.5996
185	17.2246	16.2496	30.2242	14.9496	35.0991	15.2746	25.3494	11.3747	12.9997	15.5996
186	17.2246	16.2496	30.2242	14.9496	34.7741	15.2746	25.6744	11.3747	12.9997	15.9246
187	17.2246	16.5746	30.2242	14.9496	35.0991	15.2746	25.3494	11.3747	13.3247	15.2746
188	17.2246	16.2496	30.2242	14.9496	35.0991	15.2746	25.6744	11.0497	12.9997	15.2746
189	17.2246	16.2496	30.2242	14.6246	35.0991	14.6246	25.6744	11.3747	12.9997	15.2746
190	17.2246	16.2496	30.2242	14.9496	35.4241	14.9496	25.6744	11.0497	12.9997	14.9496
191	17.5496	16.2496	30.2242	14.6246	34.7741	14.9496	25.6744	11.0497	12.9997	15.2746
192	16.8996	16.2496	30.2242	14.9496	35.4241	15.2746	25.6744	10.3997	13.6497	15.2746
193	16.8996	16.2496	30.2242	14.6246	35.0991	15.2746	25.6744	11.3747	13.3247	15.5996
194	16.8996	16.2496	30.2242	14.6246	34.7741	15.2746	25.6744	10.7247	13.3247	15.9246
195	16.8996	16.2496	30.2242	14.6246	34.7741	15.2746	25.6744	10.7247	12.9997	15.2746
196	17.2246	16.2496	30.2242	14.9496	34.7741	15.2746	25.6744	11.3747	13.3247	15.2746
197	17.2246	16.2496	30.2242	14.6246	35.4241	15.2746	25.6744	11.3747	13.3247	15.5996
198	16.8996	16.2496	30.2242	14.6246	34.7741	15.2746	25.6744	10.0747	13.3247	14.9496
199	17.2246	16.2496	29.5743	14.6246	34.4491	15.2746	25.6744	11.3747	13.3247	15.2746
200	17.5496	16.2496	30.2242	14.9496	34.7741	14.9496	25.6744	11.3747	12.6747	15.2746
201	17.5496	16.2496	30.2242	14.9496	35.4241	15.2746	25.6744	11.3747	12.6747	15.5996
202	16.8996	16.2496	30.2242	14.6246	35.0991	15.2746	25.6744	11.3747	12.9997	15.5996
203	16.8996	16.2496	30.2242	14.9496	34.7741	14.9496	25.9994	11.0497	13.3247	15.5996
204	17.2246	16.2496	30.2242	14.6246	35.0991	14.9496	25.6744	11.3747	12.9997	15.5996
205	16.8996	16.2496	30.2242	14.9496	35.0991	15.2746	25.6744	11.3747	12.9997	15.5996
206	16.8996	16.2496	30.2242	14.9496	34.4491	14.9496	25.3494	10.7247	12.6747	15.5996
207	16.8996	16.2496	30.2242	14.9496	35.0991	15.2746	25.6744	11.3747	12.6747	15.5996
208	17.2246	16.2496	30.5492	14.9496	35.0991	15.2746	25.3494	11.0497	12.9997	15.2746
209	17.2246	16.2496	30.2242	14.9496	35.0991	14.9496	25.6744	11.0497	12.6747	15.5996
210	17.2246	16.2496	29.8993	14.9496	34.7741	15.2746	25.6744	10.7247	12.9997	15.2746
211	16.8996	16.2496	30.2242	14.6246	35.0991	14.9496	25.6744	11.3747	12.9997	15.5996
212	17.2246	16.2496	30.2242	14.9496	35.0991	15.2746	25.3494	10.7247	12.6747	15.2746
213	17.2246	16.2496	30.2242	14.6246	35.4241	14.9496	25.6744	10.3997	12.9997	14.9496
214	16.8996	16.2496	30.5492	14.6246	35.0991	14.9496	25.6744	11.0497	12.9997	15.2746
215	17.2246	16.2496	30.2242	14.9496	35.4241	15.2746	25.6744	11.3747	12.9997	15.5996
216	16.8996	16.2496	30.2242	14.9496	35.4241	14.9496	25.6744	10.7247	12.9997	14.9496
217	17.2246	16.2496	30.2242	14.6246	35.4241	14.9496	25.6744	11.6997	12.6747	15.5996
218	17.2246	16.2496	29.8993	14.9496	34.7741	14.6246	25.6744	10.7247	12.6747	15.5996
219	17.2246	16.2496	30.5492	14.6246	35.0991	14.9496	25.6744	10.7247	12.9997	15.5996
220	17.2246	16.2496	30.2242	14.9496	35.4241	14.9496	25.6744	10.7247	12.9997	15.2746
221	16.8996	16.2496	30.2242	14.9496	35.4241	14.9496	25.6744	10.0747	13.3247	15.5996
222	16.8996	16.2496	29.8993	14.9496	35.0991	14.6246	25.3494	10.7247	12.9997	15.5996
223	16.8996	16.2496	30.2242	14.9496	35.0991	14.9496	25.6744	11.0497	12.6747	15.5996
224	16.8996	16.2496	30.2242	14.9496	35.0991	15.2746	25.9994	10.7247	12.6747	15.5996
225	16.8996	16.2496	30.2242	14.6246	35.4241	14.9496	25.3494	11.3747	12.6747	15.2746
226	17.2246	16.2496	29.8993	14.6246	35.0991	15.2746	25.6744	10.3997	12.6747	15.5996
227	16.8996	16.2496	30.2242	14.6246	35.0991	14.9496	25.6744	11.0497	12.6747	15.5996
228	16.8996	16.2496	30.2242	14.9496	35.0991	14.9496	25.9994	10.7247	12.0247	15.5996
229	16.8996	16.2496	30.2242	14.6246	35.0991	14.9496	25.6744	10.3997	12.6747	15.2746
230	16.8996	16.2496	29.8993	14.6246	35.0991	15.2746	25.3494	10.3997	12.6747	14.9496
231	16.8996	16.2496	29.5743	14.6246	34.7741	14.9496	25.6744	10.3997	12.3497	15.2746
232	16.8996	16.2496	30.2242	14.6246	35.0991	15.2746	25.3494	11.0497	12.3497	14.9496
233	17.2246	16.2496	29.8993	14.6246	35.0991	14.9496	25.3494	10.7247	12.6747	15.2746
234	17.2246	16.2496	30.2242	14.6246	35.0991	14.6246	25.3494	11.0497	12.6747	15.2746
235	17.2246	16.2496	29.8993	14.6246	35.0991	14.9496	25.9994	11.0497	12.6747	15.2746
236	17.2246	16.2496	29.5743	14.6246	34.7741	14.9496	25.6744	11.0497	12.9997	15.2746
237	16.8996	16.2496	30.2242	14.6246	35.4241	15.2746	25.6744	10.3997	12.6747	15.2746
238	16.8996	16.2496	29.5743	14.9496	34.7741	14.6246	25.6744	10.3997	12.3497	15.2746
239	16.8996	16.2496	29.8993	14.9496	35.0991	15.2746	25.6744	11.0497	12.6747	15.2746
240	16.8996	16.2496	29.8993	14.9496	35.0991	14.9496	25.3494	11.0497	12.6747	14.6246
241	16.8996	16.2496	29.8993	14.9496	35.0991	15.2746	25.6744	11.0497	12.3497	15.5996
242	17.2246	16.2496	29.8993	14.9496	34.7741	15.2746	25.3494	11.3747	12.3497	15.5996
243	16.8996	15.9246	29.8993	14.6246	35.4241	15.5996	25.3494	11.3747	12.0247	15.2746
244	16.8996	16.2496	30.2242	14.9496	35.4241	15.2746	25.6744	11.3747	12.9997	15.2746
245	16.8996	16.2496	29.5743	14.9496	34.7741	15.2746	25.3494	11.0497	13.3247	15.2746
246	17.2246	16.2496	29.5743	14.9496	35.0991	15.2746	25.6744	10.0747	12.6747	15.5996
247	17.2246	16.2496	29.8993	14.9496	35.0991	15.2746	25.9994	11.0497	12.6747	15.2746
248	16.5746	16.2496	30.2242	14.9496	34.7741	14.9496	25.9994	10.7247	12.6747	15.2746
249	16.8996	16.2496	30.2242	14.9496	35.0991	15.2746	25.6744	11.0497	12.9997	15.5996
250	16.8996	16.2496	29.5743	14.9496	35.4241	14.9496	25.3494	11.0497	12.9997	15.2746
251	16.8996	16.2496	29.8993	14.9496	35.4241	14.9496	25.6744	11.0497	12.9997	15.2746
252	16.8996	16.2496	29.2493	14.9496	35.7491	14.9496	25.9994	11.0497	12.9997	15.5996
253	16.8996	16.2496	30.2242	14.9496	35.4241	15.2746	25.6744	10.3997	13.3247	14.9496
254	16.8996	16.2496	29.8993	14.6246	35.4241	15.2746	25.9994	10.7247	13.3247	15.5996
255	16.8996	16.2496	29.2493	14.9496	35.0991	15.2746	25.6744	10.0747	12.9997	14.9496
256	16.8996	16.2496	29.8993	14.9496	35.4241	15.2746	25.3494	10.3997	13.3247	15.2746
257	16.8996	16.2496	29.5743	14.9496	35.0991	15.5996	25.9994	10.3997	13.3247	15.2746
258	16.8996	16.2496	29.5743	14.9496	35.4241	14.6246	25.3494	11.0497	13.3247	14.9496
259	16.2496	16.2496	29.8993	14.9496	35.0991	15.2746	25.9994	10.7247	13.3247	15.2746
260	16.8996	15.9246	29.5743	14.6246	35.4241	14.9496	25.6744	10.7247	13.3247	15.2746
261	16.8996	16.2496	29.2493	14.6246	35.4241	14.9496	25.9994	11.3747	13.3247	15.2746
262	17.2246	15.9246	29.5743	14.9496	35.0991	14.9496	25.3494	10.7247	13.6497	15.2746
263	16.8996	16.2496	29.8993	14.9496	35.7491	14.6246	25.6744	10.7247	13.6497	15.5996
264	17.2246	16.2496	29.5743	14.9496	35.0991	14.6246	25.6744	10.0747	13.6497	15.2746
265	16.8996	16.2496	29.5743	14.9496	35.0991	15.2746	25.6744	10.7247	13.6497	15.2746
266	16.8996	15.9246	29.8993	14.9496	35.4241	15.2746	25.6744	10.3997	13.6497	15.2746
267	16.8996	16.2496	29.8993	14.6246	35.0991	14.6246	25.6744	10.7247	13.9747	14.6246
268	16.8996	16.2496	29.5743	14.9496	35.4241	14.6246	25.9994	10.3997	13.3247	15.2746
269	16.8996	16.2496	30.2242	14.9496	35.0991	15.2746	25.9994	10.3997	13.6497	15.2746
270	17.2246	16.2496	29.5743	14.9496	35.0991	15.2746	25.6744	10.7247	13.3247	14.9496
271	16.5746	16.2496	30.2242	14.9496	35.0991	15.2746	25.3494	11.0497	13.6497	15.5996
272	16.8996	16.2496	29.8993	14.9496	35.0991	14.9496	25.6744	11.0497	13.6497	14.9496
273	16.8996	16.2496	29.5743	15.2746	35.4241	14.9496	25.6744	11.0497	13.6497	15.2746
274	16.5746	16.2496	29.8993	14.9496	35.4241	15.2746	25.3494	11.0497	13.6497	15.5996
275	16.8996	16.2496	29.5743	14.9496	35.0991	14.9496	25.9994	11.0497	13.6497	15.2746
276	16.5746	16.2496	29.8993	14.9496	35.0991	15.2746	25.6744	10.7247	13.6497	15.2746
277	16.5746	16.2496	29.8993	14.9496	35.4241	14.9496	25.6744	11.0497	13.3247	15.5996
278	16.8996	16.2496	29.8993	15.2746	35.0991	15.2746	25.6744	11.0497	13.3247	15.2746
279	16.8996	15.9246	29.8993	14.9496	35.4241	15.2746	25.9994	10.7247	13.3247	15.5996
280	16.5746	16.2496	29.8993	14.9496	35.4241	15.2746	25.6744	10.7247	13.6497	15.5996
281	16.8996	16.2496	29.8993	14.6246	35.0991	14.6246	25.9994	10.3997	13.3247	15.2746
282	16.8996	16.5746	29.5743	14.9496	35.0991	15.2746	25.6744	10.7247	12.9997	15.2746
283	16.8996	16.2496	29.8993	14.9496	35.4241	14.6246	25.9994	11.0497	13.3247	14.9496
284	16.8996	16.2496	29.8993	14.9496	35.4241	14.9496	25.6744	10.3997	12.9997	15.2746
285	16.8996	15.9246	29.8993	14.9496	35.0991	15.2746	25.6744	10.7247	13.3247	15.5996
286	16.8996	15.9246	29.8993	14.9496	35.0991	14.9496	25.6744	11.0497	13.9747	15.5996
287	16.8996	16.2496	29.8993	14.9496	35.4241	15.2746	25.6744	11.0497	13.3247	15.2746
288	16.8996	15.9246	29.8993	14.9496	35.4241	14.9496	25.9994	11.0497	13.3247	15.5996
289	17.2246	16.2496	29.8993	14.9496	35.0991	14.6246	25.9994	10.3997	13.6497	15.2746
290	16.8996	16.2496	29.8993	14.9496	35.4241	14.9496	25.6744	11.0497	12.9997	15.2746
291	16.5746	15.9246	29.8993	14.9496	35.0991	15.2746	25.6744	10.7247	13.9747	15.2746
292	16.8996	16.2496	29.8993	14.9496	35.4241	15.2746	25.3494	10.7247	13.6497	14.9496
293	16.8996	16.2496	29.8993	14.9496	35.4241	15.2746	25.9994	10.7247	13.3247	15.5996
294	16.8996	16.2496	29.8993	14.6246	35.4241	14.9496	25.6744	11.0497	13.6497	15.2746
295	16.8996	16.2496	29.8993	14.6246	35.4241	14.9496	25.6744	11.0497	12.9997	15.2746
296	16.8996	16.2496	30.2242	14.9496	35.0991	14.9496	25.9994	10.7247	13.3247	15.2746
297	16.8996	16.2496	30.2242	14.9496	35.4241	14.9496	25.9994	10.3997	13.3247	14.9496
298	17.2246	16.2496	29.5743	14.9496	35.4241	14.9496	25.9994	11.0497	13.6497	15.2746
299	16.8996	16.2496	29.8993	14.9496	35.4241	14.9496	25.9994	10.0747	13.6497	15.2746
300	16.8996	16.2496	29.5743	14.9496	35.4241	14.9496	25.9994	11.0497	12.9997	15.5996
301	17.2246	16.2496	29.8993	14.6246	35.4241	14.6246	25.6744	11.0497	13.3247	15.2746
302	16.8996	15.9246	30.2242	14.9496	35.4241	14.9496	25.3494	10.7247	13.3247	15.2746
303	17.2246	16.2496	30.2242	14.9496	35.7491	15.2746	25.6744	10.7247	13.3247	15.2746
304	17.2246	16.2496	29.8993	14.6246	35.0991	15.2746	25.6744	10.3997	13.6497	15.2746
305	17.2246	16.2496	29.8993	14.9496	35.0991	14.9496	25.3494	11.6997	13.6497	14.9496
306	16.8996	16.2496	30.2242	14.9496	35.0991	14.9496	25.9994	10.7247	13.6497	15.2746
307	16.8996	16.2496	30.2242	14.9496	35.4241	15.2746	25.9994	11.0497	13.9747	15.2746
308	16.8996	16.2496	29.8993	14.9496	35.4241	14.9496	25.9994	11.0497	13.9747	15.2746
309	16.8996	16.2496	30.2242	14.9496	35.0991	15.2746	25.6744	10.0747	13.3247	15.2746
310	16.5746	16.2496	29.5743	14.6246	35.0991	15.2746	25.9994	11.3747	13.6497	14.9496
311	16.8996	16.2496	29.5743	14.9496	35.0991	15.5996	25.6744	10.7247	13.3247	15.2746
312	16.8996	16.2496	29.8993	14.9496	35.0991	15.2746	25.9994	11.0497	13.3247	15.5996
313	16.8996	16.2496	29.8993	14.9496	35.0991	15.5996	25.6744	11.3747	13.3247	15.5996
314	17.2246	16.2496	29.8993	14.9496	35.0991	15.5996	25.9994	11.6997	12.9997	15.2746
315	17.2246	16.2496	30.2242	14.9496	35.0991	14.9496	25.6744	10.3997	13.3247	15.2746
316	16.8996	16.2496	29.5743	14.9496	35.0991	15.2746	25.6744	10.7247	13.3247	15.2746
317	16.8996	16.2496	29.5743	14.9496	35.0991	15.5996	25.6744	10.7247	12.9997	15.2746
318	16.8996	15.9246	29.8993	14.9496	35.4241	15.5996	25.3494	10.7247	12.6747	15.2746
319	16.8996	16.2496	29.8993	14.9496	35.0991	15.5996	25.6744	11.0497	12.6747	15.5996
320	17.2246	16.2496	30.2242	14.9496	35.4241	15.5996	25.3494	11.6997	13.3247	15.9246
321	16.8996	16.2496	29.5743	14.9496	35.4241	15.2746	25.6744	11.0497	12.9997	15.5996
322	16.8996	16.2496	29.8993	14.6246	35.0991	15.5996	25.6744	10.7247	13.3247	15.2746
323	16.8996	16.2496	29.5743	14.9496	35.4241	15.5996	25.6744	10.7247	12.9997	14.9496
324	16.8996	16.2496	29.8993	14.9496	35.4241	15.2746	25.6744	10.7247	13.3247	15.5996
325	17.2246	16.2496	29.5743	14.6246	35.4241	15.2746	25.6744	10.7247	12.6747	15.5996
326	17.2246	16.2496	29.8993	14.6246	35.4241	15.5996	25.6744	11.0497	12.6747	15.2746
327	17.5496	16.2496	29.8993	14.6246	35.4241	15.5996	25.3494	11.0497	13.3247	15.5996
328	16.8996	16.2496	29.5743	14.6246	35.0991	15.2746	25.6744	11.0497	13.3247	15.5996
329	16.8996	16.2496	29.5743	14.6246	35.4241	15.5996	25.6744	11.3747	13.3247	15.9246
330	16.8996	16.2496	29.5743	14.6246	35.4241	15.2746	25.6744	11.3747	13.3247	16.2496
331	16.8996	16.2496	29.8993	14.6246	35.4241	14.9496	25.6744	11.3747	12.6747	16.2496
332	17.2246	16.2496	29.5743	14.6246	35.0991	15.2746	25.9994	11.6997	12.9997	15.9246
333	16.8996	16.2496	29.5743	14.6246	35.4241	15.5996	25.9994	11.3747	13.9747	15.9246
334	16.8996	16.2496	29.8993	14.6246	35.4241	15.5996	25.6744	11.0497	13.6497	15.5996
335	16.8996	16.2496	29.8993	14.6246	35.7491	15.5996	25.6744	11.0497	13.3247	15.5996
336	16.8996	16.2496	29.5743	14.9496	35.0991	15.2746	25.6744	11.0497	12.9997	15.9246
337	17.2246	16.2496	29.8993	14.6246	35.4241	15.2746	25.9994	11.3747	12.9997	15.9246
338	16.8996	16.2496	29.8993	14.6246	35.4241	14.9496	25.9994	11.0497	12.6747	14.6246
339	16.8996	16.2496	29.8993	14.9496	35.4241	15.5996	25.6744	11.0497	13.3247	14.6246
340	16.8996	16.2496	29.5743	14.9496	36.0741	15.2746	25.6744	11.0497	12.9997	15.9246
341	16.8996	16.2496	29.8993	14.6246	35.4241	14.9496	25.6744	11.0497	13.3247	15.5996
342	16.8996	15.9246	29.5743	14.6246	35.4241	14.9496	25.6744	10.7247	13.3247	16.2496
343	16.8996	16.2496	29.8993	14.6246	35.7491	15.2746	25.6744	10.7247	12.9997	15.5996
344	17.5496	16.2496	29.8993	14.6246	35.0991	15.2746	25.6744	11.0497	13.3247	15.5996
345	16.8996	16.2496	29.8993	14.6246	34.7741	14.9496	25.6744	11.0497	13.3247	15.5996
346	16.8996	16.2496	29.5743	14.6246	35.0991	15.2746	25.3494	10.7247	12.9997	15.2746
347	16.5746	16.2496	29.2493	14.6246	35.0991	15.5996	25.9994	11.3747	13.3247	15.9246
348	16.8996	16.2496	29.5743	14.6246	35.4241	15.5996	25.9994	10.7247	13.3247	15.2746
349	16.8996	16.2496	29.8993	14.6246	35.4241	15.5996	25.6744	10.7247	13.6497	15.9246
350	16.5746	16.2496	29.5743	14.6246	35.0991	15.5996	25.6744	11.0497	13.3247	15.2746
351	16.8996	16.2496	30.2242	14.6246	35.7491	15.2746	25.6744	11.0497	13.6497	15.5996
352	17.2246	16.2496	29.8993	14.6246	35.0991	15.2746	25.6744	10.7247	13.6497	14.9496
353	16.8996	16.2496	30.2242	14.6246	35.0991	15.2746	25.6744	10.7247	13.3247	15.2746
354	16.8996	16.2496	29.8993	14.6246	35.0991	15.2746	25.6744	11.3747	13.6497	15.5996
355	16.8996	16.2496	29.8993	14.6246	35.0991	15.5996	25.9994	10.7247	13.6497	15.2746
356	16.5746	16.2496	29.2493	14.6246	35.7491	15.2746	25.6744	11.0497	13.3247	15.2746
357	16.8996	16.2496	29.5743	14.6246	35.0991	15.2746	25.9994	10.7247	13.6497	14.6246
358	16.8996	16.2496	29.5743	14.6246	35.0991	15.5996	25.6744	11.0497	13.6497	14.9496
359	17.2246	16.2496	29.8993	14.9496	35.0991	15.2746	25.6744	11.0497	13.3247	14.9496
360	16.8996	16.2496	29.8993	14.6246	35.0991	15.9246	25.3494	11.0497	13.3247	14.6246
361	17.2246	16.2496	29.5743	14.6246	35.4241	15.2746	25.6744	10.3997	12.9997	15.2746
362	17.2246	16.2496	29.5743	14.6246	35.0991	15.5996	25.9994	11.3747	12.9997	15.2746
363	17.2246	16.2496	29.8993	14.6246	35.4241	15.5996	25.9994	10.7247	13.3247	15.2746
364	17.2246	16.2496	29.8993	14.6246	35.0991	15.2746	25.6744	11.0497	12.9997	15.2746
365	17.2246	16.2496	29.8993	14.6246	35.0991	15.2746	25.6744	10.7247	13.3247	15.2746
366	17.2246	16.2496	30.2242	14.6246	35.0991	15.2746	25.6744	10.7247	13.6497	14.9496
367	17.2246	16.2496	30.2242	14.6246	35.4241	15.2746	25.6744	10.7247	13.3247	14.6246
368	17.2246	16.2496	30.2242	14.6246	35.4241	15.2746	25.9994	11.0497	12.9997	14.9496
369	17.2246	16.2496	30.5492	14.6246	35.0991	15.5996	25.6744	11.0497	12.9997	14.6246
370	17.2246	16.2496	29.8993	14.6246	35.0991	15.5996	25.6744	10.3997	13.3247	14.9496
371	17.2246	16.2496	30.2242	14.6246	35.0991	15.5996	25.3494	10.3997	13.3247	14.9496
372	17.2246	16.2496	30.5492	14.6246	34.7741	15.9246	25.6744	10.3997	13.3247	14.9496
373	17.2246	16.2496	30.5492	14.9496	35.0991	15.2746	25.6744	10.7247	13.3247	14.6246
374	17.5496	16.2496	29.8993	14.6246	35.4241	15.2746	25.6744	11.0497	13.3247	14.9496
375	17.2246	16.2496	29.8993	14.6246	35.0991	15.2746	25.6744	10.7247	12.9997	14.6246
376	17.2246	16.2496	30.5492	14.6246	35.0991	15.2746	25.9994	10.7247	12.9997	14.2996
377	17.2246	16.2496	29.8993	14.6246	35.0991	15.5996	25.6744	10.7247	12.9997	14.9496
378	16.8996	16.2496	29.8993	14.6246	35.0991	15.2746	25.6744	10.7247	12.9997	15.2746
379	17.2246	16.2496	29.8993	14.6246	35.0991	14.9496	25.6744	10.7247	13.3247	15.2746
380	17.5496	16.2496	30.2242	14.6246	35.0991	15.2746	25.6744	10.7247	12.9997	14.9496
381	16.8996	16.2496	30.2242	14.6246	35.4241	15.2746	25.9994	10.3997	13.3247	15.2746
382	17.2246	16.2496	30.2242	14.6246	34.7741	15.5996	25.6744	11.3747	13.3247	15.2746
383	17.2246	16.2496	29.8993	14.9496	35.4241	15.5996	25.6744	10.3997	13.3247	15.5996
384	17.5496	16.2496	30.5492	14.6246	35.0991	15.9246	25.9994	10.7247	12.9997	15.2746
385	17.2246	16.2496	29.8993	14.6246	35.0991	15.2746	25.6744	10.7247	12.9997	14.9496
386	17.2246	16.2496	30.2242	14.9496	35.4241	15.2746	25.6744	10.3997	13.3247	14.6246
387	17.2246	16.2496	30.2242	14.6246	35.0991	15.2746	25.6744	10.7247	13.3247	14.6246
388	17.2246	16.2496	30.2242	14.6246	35.0991	15.2746	25.6744	11.0497	12.9997	14.6246
389	17.2246	16.2496	29.8993	14.6246	35.4241	15.2746	25.6744	11.3747	13.3247	14.6246
390	17.2246	16.2496	29.8993	14.6246	35.4241	15.2746	25.6744	10.3997	13.3247	14.9496
391	17.2246	16.2496	29.8993	14.6246	35.0991	15.2746	25.6744	10.7247	12.9997	14.6246
392	17.2246	16.2496	29.8993	14.9496	35.0991	15.2746	25.9994	10.7247	13.3247	14.6246
393	17.2246	15.9246	30.2242	14.6246	35.4241	14.9496	25.6744	10.7247	13.3247	14.6246
394	17.5496	16.2496	30.2242	14.6246	35.0991	14.9496	25.6744	10.7247	12.9997	15.2746
395	17.5496	16.2496	29.8993	14.9496	35.0991	15.5996	25.6744	10.7247	12.9997	15.2746
396	17.2246	15.9246	29.8993	14.6246	34.7741	15.2746	25.6744	11.3747	12.6747	14.9496
397	17.2246	16.2496	29.8993	14.6246	35.4241	15.5996	25.3494	11.6997	12.9997	14.9496
398	17.5496	16.2496	29.8993	14.9496	35.0991	15.2746	25.6744	11.3747	12.9997	15.2746
399	17.2246	16.2496	29.8993	14.9496	35.0991	15.2746	25.9994	11.3747	12.9997	15.2746
400	17.2246	16.2496	29.5743	14.9496	35.0991	15.2746	25.6744	12.0247	12.9997	14.9496
401	17.2246	16.2496	30.2242	14.6246	34.7741	15.5996	25.6744	10.3997	12.6747	14.9496
402	17.2246	16.2496	29.8993	14.6246	35.4241	15.2746	25.6744	10.7247	12.6747	15.5996
403	17.2246	15.9246	30.2242	14.6246	35.4241	15.2746	25.6744	10.7247	12.6747	14.6246
404	17.2246	16.2496	29.8993	14.6246	35.0991	15.2746	25.9994	11.3747	12.6747	14.6246
405	17.2246	15.9246	29.8993	14.6246	35.4241	15.2746	25.6744	10.7247	12.3497	14.9496
406	17.2246	16.2496	29.8993	14.6246	34.7741	15.2746	25.6744	10.0747	12.6747	15.2746
407	17.2246	16.2496	29.8993	14.9496	35.4241	15.2746	25.6744	11.3747	12.3497	15.2746
408	17.2246	15.9246	29.8993	14.6246	35.0991	14.9496	25.9994	11.0497	12.3497	15.2746
409	17.2246	16.2496	29.8993	14.6246	35.0991	15.2746	25.3494	11.0497	12.3497	15.9246
410	17.8746	15.9246	29.8993	14.6246	35.0991	15.2746	25.6744	11.0497	12.6747	15.9246
411	17.2246	16.2496	29.8993	14.9496	35.0991	15.5996	25.6744	10.3997	12.6747	15.5996
412	17.2246	15.9246	29.8993	14.6246	35.0991	14.6246	25.3494	11.0497	12.3497	15.5996
413	17.2246	15.9246	29.8993	14.9496	35.0991	14.9496	25.9994	10.7247	12.6747	15.9246
414	17.2246	16.2496	29.8993	14.9496	35.4241	15.2746	25.9994	10.7247	12.9997	15.5996
415	17.2246	15.9246	29.8993	14.6246	35.0991	14.9496	25.6744	11.0497	12.6747	14.9496
416	17.2246	16.2496	29.8993	14.6246	35.4241	15.5996	25.3494	11.0497	12.9997	15.5996
417	17.2246	15.9246	29.8993	14.6246	35.0991	14.9496	25.6744	11.0497	12.6747	14.9496
418	17.2246	16.2496	29.8993	14.6246	35.0991	14.9496	25.9994	11.0497	12.6747	14.9496
419	17.2246	15.9246	29.8993	14.6246	35.0991	14.9496	25.3494	11.3747	12.6747	15.5996
420	17.2246	15.9246	29.8993	14.6246	34.7741	15.2746	25.3494	11.3747	12.6747	14.9496
421	17.2246	16.2496	30.2242	14.6246	35.4241	15.2746	25.6744	11.0497	12.9997	14.9496
422	17.2246	15.9246	29.8993	14.6246	35.4241	15.2746	25.9994	10.7247	12.9997	14.9496
423	17.5496	15.9246	29.8993	14.6246	35.4241	15.2746	25.6744	10.7247	13.3247	14.9496
424	16.8996	15.9246	29.8993	14.9496	34.7741	15.5996	25.3494	10.7247	12.9997	15.9246
425	17.2246	15.9246	29.8993	14.6246	35.4241	15.5996	25.6744	10.7247	12.9997	15.2746
426	17.2246	16.2496	30.2242	14.6246	34.7741	15.5996	25.3494	10.3997	13.3247	15.5996
427	17.2246	15.9246	30.2242	14.6246	35.4241	15.5996	25.3494	11.0497	12.9997	14.9496
428	16.8996	15.9246	30.2242	14.6246	35.0991	15.2746	25.6744	10.3997	12.9997	14.9496
429	17.2246	15.9246	29.8993	14.9496	35.0991	15.2746	25.6744	11.0497	12.9997	14.9496
430	17.2246	16.2496	30.2242	14.6246	35.0991	15.2746	25.3494	11.0497	12.9997	14.9496
431	16.8996	16.5746	29.8993	14.6246	35.0991	15.2746	25.6744	11.3747	12.9997	14.6246
432	16.8996	15.9246	30.2242	14.6246	35.0991	15.5996	25.6744	10.3997	12.9997	14.2996
433	17.2246	16.2496	29.8993	14.6246	35.4241	15.2746	25.6744	11.3747	13.3247	14.2996
434	17.2246	16.2496	29.8993	14.6246	35.4241	15.2746	25.3494	11.0497	12.9997	14.6246
435	17.2246	15.9246	29.8993	14.6246	35.4241	15.2746	25.3494	10.3997	12.9997	14.9496
436	17.2246	15.9246	29.8993	14.6246	35.0991	15.2746	25.6744	11.3747	12.9997	14.9496
437	17.2246	15.9246	29.8993	14.6246	35.0991	15.2746	25.6744	11.0497	13.3247	14.9496
438	17.2246	15.9246	30.2242	14.6246	35.0991	15.2746	25.6744	10.7247	12.9997	14.6246
439	17.2246	15.9246	29.8993	14.6246	35.4241	15.2746	25.6744	11.0497	12.9997	14.6246
440	17.2246	15.9246	29.8993	14.6246	35.0991	15.2746	25.6744	11.0497	13.3247	14.6246
441	17.2246	16.2496	29.8993	14.6246	35.0991	15.2746	25.3494	11.3747	13.9747	14.6246
442	17.2246	16.2496	29.8993	14.6246	35.0991	15.2746	25.6744	11.0497	13.3247	14.6246
443	17.5496	15.9246	29.8993	14.6246	35.0991	15.2746	25.3494	10.7247	13.9747	14.9496
444	17.2246	15.9246	30.2242	14.9496	35.4241	15.2746	25.3494	11.0497	13.6497	15.2746
445	17.2246	15.9246	30.2242	14.6246	35.4241	15.2746	25.9994	11.0497	13.3247	14.9496
446	17.2246	15.9246	29.8993	14.6246	35.4241	15.5996	25.3494	11.0497	13.6497	14.6246
447	17.2246	16.2496	29.8993	14.9496	35.0991	15.5996	25.6744	10.7247	13.6497	14.9496
448	17.2246	16.2496	30.2242	14.6246	35.0991	14.9496	25.3494	10.3997	13.6497	14.9496
449	17.2246	15.9246	29.5743	14.6246	35.0991	15.5996	25.6744	10.0747	13.9747	14.9496
450	17.2246	16.2496	29.8993	14.6246	35.4241	15.5996	25.3494	10.3997	13.9747	14.9496
451	17.2246	15.9246	29.8993	14.6246	35.0991	14.9496	25.6744	10.0747	13.9747	15.2746
452	17.2246	16.2496	29.5743	14.6246	35.4241	15.2746	25.3494	11.0497	13.3247	15.2746
453	17.2246	15.9246	29.5743	14.6246	35.4241	15.2746	25.0244	11.0497	13.6497	15.2746
454	17.2246	15.9246	29.5743	14.6246	35.0991	14.9496	25.6744	11.3747	13.9747	15.2746
455	17.2246	15.9246	29.5743	14.6246	34.7741	14.9496	25.6744	10.7247	14.2996	15.2746
456	17.2246	16.2496	29.8993	14.6246	35.0991	14.9496	25.6744	11.3747	13.9747	14.9496
457	17.2246	15.9246	29.8993	14.9496	35.0991	15.5996	25.6744	10.7247	14.6246	14.6246
458	17.5496	15.9246	29.5743	14.6246	35.0991	15.5996	25.3494	10.7247	14.6246	14.6246
459	17.2246	15.9246	29.8993	14.9496	34.7741	15.5996	25.6744	10.7247	14.2996	14.6246
460	17.2246	15.9246	29.8993	14.9496	35.0991	15.2746	25.6744	11.0497	14.2996	14.9496
461	17.2246	15.9246	29.8993	14.9496	35.0991	14.9496	25.6744	11.6997	14.2996	14.9496
462	16.8996	15.9246	30.2242	14.6246	35.0991	15.2746	25.6744	11.0497	14.6246	14.9496
463	17.2246	15.9246	29.5743	14.9496	35.0991	15.2746	25.9994	11.0497	13.9747	14.2996
464	17.2246	15.9246	29.8993	14.6246	34.7741	15.2746	25.9994	11.0497	14.6246	15.2746
465	17.2246	15.9246	29.8993	14.9496	34.7741	15.2746	25.6744	11.0497	14.2996	14.9496
466	17.2246	15.9246	29.5743	14.9496	34.7741	15.2746	25.6744	11.0497	14.6246	14.9496
467	17.2246	15.9246	29.8993	14.6246	35.0991	15.2746	25.3494	10.7247	14.6246	14.6246
468	17.2246	15.9246	29.8993	14.9496	35.4241	14.9496	25.6744	11.0497	14.2996	14.6246
469	17.2246	15.9246	29.8993	14.6246	35.0991	15.2746	25.6744	10.7247	14.2996	14.6246
470	17.5496	15.9246	30.2242	14.9496	34.7741	14.9496	25.6744	10.7247	13.9747	14.6246
471	17.5496	15.9246	29.8993	14.9496	35.0991	15.2746	25.6744	11.3747	13.9747	14.6246
472	17.2246	15.9246	29.8993	14.9496	35.0991	15.2746	25.6744	11.0497	13.9747	14.6246
473	17.2246	15.9246	29.8993	14.9496	35.4241	15.2746	25.6744	11.6997	13.9747	14.6246
474	16.8996	16.2496	30.2242	14.9496	35.4241	14.9496	25.6744	10.7247	14.2996	14.6246
475	17.2246	16.2496	30.2242	14.6246	35.4241	14.9496	25.6744	11.0497	14.2996	14.2996
476	16.8996	16.2496	30.2242	14.6246	34.7741	14.6246	25.3494	11.0497	13.9747	14.6246
477	17.2246	15.9246	30.2242	14.9496	35.0991	14.9496	25.6744	11.3747	14.6246	14.6246
478	16.8996	16.2496	29.8993	14.9496	35.4241	14.6246	25.6744	10.7247	14.2996	14.6246
479	17.2246	15.9246	30.2242	14.9496	35.0991	15.2746	25.6744	11.0497	14.2996	14.2996
480	16.8996	15.9246	29.8993	14.6246	35.0991	14.9496	25.3494	10.3997	14.2996	14.6246
481	17.2246	15.5996	29.5743	14.9496	35.0991	15.2746	25.6744	11.3747	14.2996	14.6246
482	17.2246	15.9246	30.2242	14.6246	34.7741	14.6246	25.6744	10.7247	14.2996	14.6246
483	17.2246	16.2496	30.2242	14.9496	35.4241	14.9496	25.9994	12.0247	14.6246	14.2996
484	17.2246	16.2496	30.5492	14.9496	35.0991	14.9496	25.9994	11.0497	14.6246	14.6246
485	17.2246	15.9246	30.2242	14.9496	35.0991	14.9496	25.6744	12.0247	14.6246	14.6246
486	17.2246	16.2496	29.8993	14.9496	35.4241	14.9496	25.6744	11.3747	14.2996	14.6246
487	17.2246	15.9246	30.2242	14.9496	35.0991	15.2746	25.6744	11.0497	14.2996	14.9496
488	17.2246	16.2496	29.8993	14.9496	35.0991	15.2746	25.6744	11.3747	14.2996	14.6246
489	17.2246	15.9246	29.8993	14.2996	35.4241	15.2746	25.6744	10.7247	13.9747	14.6246
490	17.2246	16.2496	29.8993	14.9496	35.0991	14.9496	25.6744	10.7247	14.2996	14.9496
491	16.8996	15.9246	29.8993	14.9496	35.4241	15.5996	25.9994	11.3747	13.6497	14.6246
492	17.2246	16.2496	30.2242	14.6246	35.4241	14.6246	25.6744	11.6997	13.9747	14.9496
493	17.2246	16.2496	29.8993	14.9496	35.0991	15.2746	25.6744	11.0497	14.2996	14.9496
494	17.2246	15.9246	29.8993	14.6246	35.4241	15.2746	25.6744	11.0497	14.2996	14.6246
495	17.2246	15.9246	29.8993	14.9496	35.0991	15.5996	25.6744	11.0497	14.6246	14.2996
496	16.8996	16.2496	30.2242	14.9496	35.0991	15.2746	25.6744	11.6997	13.9747	13.9747
497	17.2246	15.9246	29.8993	14.6246	35.0991	15.2746	25.6744	10.3997	14.6246	14.2996
498	16.8996	15.9246	29.8993	14.9496	35.0991	14.9496	25.3494	10.0747	14.2996	14.6246
499	17.2246	15.9246	29.8993	14.6246	35.4241	14.9496	25.6744	11.3747	13.9747	14.6246
500	17.2246	16.2496	30.2242	14.6246	35.0991	15.2746	25.9994	10.7247	13.6497	15.2746
501	17.2246	15.9246	29.8993	14.6246	35.0991	14.9496	25.6744	11.0497	13.9747	14.6246
502	16.8996	15.9246	29.8993	14.6246	35.0991	15.5996	25.9994	11.0497	14.6246	14.9496
503	17.2246	16.2496	30.2242	14.6246	35.0991	14.9496	25.6744	11.3747	14.2996	14.2996
504	17.2246	16.2496	30.2242	14.9496	35.0991	15.2746	25.9994	11.3747	13.6497	14.2996
505	17.2246	16.2496	29.8993	14.9496	35.0991	15.2746	25.6744	11.6997	14.2996	14.2996
506	16.8996	15.9246	30.2242	14.6246	34.7741	14.9496	25.6744	10.7247	13.6497	14.2996
507	17.2246	15.9246	30.2242	14.6246	35.4241	14.9496	25.3494	11.6997	13.3247	14.2996
508	17.2246	16.2496	29.8993	14.6246	34.7741	15.5996	25.6744	10.7247	13.3247	13.9747
509	16.8996	16.2496	29.8993	14.6246	35.0991	15.5996	25.9994	11.6997	12.9997	13.9747
510	16.8996	15.9246	30.2242	14.6246	34.7741	14.9496	25.6744	11.0497	13.3247	14.2996
511	17.2246	16.2496	30.2242	14.6246	34.7741	14.9496	25.6744	11.0497	13.3247	14.2996
512	17.2246	16.2496	29.8993	14.6246	35.0991	14.9496	25.6744	10.7247	12.9997	14.6246
513	17.2246	15.9246	29.8993	14.6246	35.0991	15.2746	25.3494	10.3997	13.9747	13.9747
514	16.8996	16.2496	29.5743	14.6246	35.0991	15.5996	25.3494	10.3997	12.9997	14.6246
515	16.8996	16.5746	29.8993	14.6246	35.0991	14.9496	25.6744	10.0747	13.3247	14.2996
516	16.5746	16.2496	29.8993	14.6246	34.4491	15.2746	25.3494	11.6997	13.6497	13.9747
517	16.8996	16.2496	29.8993	14.6246	35.0991	14.9496	25.3494	11.3747	13.3247	14.2996
518	16.8996	16.2496	30.2242	14.6246	35.0991	15.2746	25.3494	11.3747	13.3247	14.9496
519	16.8996	15.9246	29.8993	14.9496	35.0991	14.9496	25.6744	11.3747	12.9997	14.6246
520	16.5746	16.2496	29.8993	14.6246	35.0991	14.9496	25.6744	11.0497	13.3247	13.6497
521	16.8996	16.2496	30.2242	14.6246	34.7741	14.9496	25.6744	11.0497	13.3247	14.2996
522	16.8996	16.2496	30.2242	14.9496	34.7741	15.2746	25.3494	11.0497	12.9997	14.2996
523	17.2246	16.2496	30.2242	14.6246	35.4241	15.2746	25.3494	11.0497	12.9997	14.2996
524	16.8996	16.2496	29.5743	14.6246	34.7741	14.9496	25.3494	10.7247	13.3247	13.9747
525	17.2246	16.2496	29.8993	14.6246	35.0991	15.5996	25.9994	11.0497	13.3247	13.9747
526	17.2246	16.2496	29.8993	14.6246	34.7741	14.9496	25.6744	11.0497	13.3247	14.2996
527	17.2246	16.2496	29.8993	14.6246	34.7741	14.9496	25.9994	10.7247	13.6497	14.2996
528	16.8996	16.2496	29.5743	14.6246	34.7741	15.2746	25.3494	10.7247	13.3247	13.6497
529	17.2246	16.2496	29.8993	14.9496	35.0991	14.9496	25.6744	10.7247	13.9747	14.2996
530	17.2246	16.2496	29.8993	14.6246	34.7741	14.9496	25.6744	11.0497	13.6497	14.6246
531	16.8996	16.2496	29.8993	14.6246	35.0991	15.5996	25.9994	10.7247	13.9747	13.9747
532	16.8996	16.2496	29.8993	14.6246	34.7741	15.2746	25.6744	10.7247	13.6497	13.6497
533	16.8996	16.5746	30.2242	14.9496	35.4241	14.9496	25.3494	10.7247	13.3247	13.9747
534	17.2246	16.2496	29.8993	14.6246	34.7741	15.2746	25.6744	10.3997	13.6497	13.9747
535	17.2246	15.9246	29.8993	14.6246	35.0991	14.9496	25.3494	11.0497	12.9997	14.2996
536	16.8996	16.2496	30.2242	14.6246	34.7741	14.9496	25.6744	10.3997	13.9747	13.9747
537	16.8996	16.2496	29.8993	14.6246	35.0991	15.2746	25.9994	10.7247	13.9747	14.2996
538	16.8996	16.2496	30.2242	14.6246	35.0991	15.5996	25.3494	10.7247	13.9747	14.6246
539	17.2246	16.2496	29.8993	14.9496	35.0991	14.9496	25.9994	10.7247	13.9747	14.2996
540	17.2246	16.2496	29.8993	14.9496	35.0991	14.9496	25.6744	11.6997	13.9747	13.9747
541	17.2246	16.2496	30.2242	14.9496	35.0991	15.5996	25.6744	10.7247	13.9747	14.6246
542	17.2246	16.2496	30.2242	14.9496	34.7741	15.5996	25.6744	10.7247	13.9747	14.2996
543	17.2246	16.2496	30.2242	14.9496	34.7741	15.2746	25.3494	10.7247	13.9747	13.9747
544	16.8996	16.2496	29.8993	14.6246	34.7741	15.2746	25.6744	11.3747	13.9747	13.9747
545	17.2246	16.2496	30.2242	15.2746	34.7741	15.5996	25.6744	11.0497	13.9747	14.2996
546	17.2246	16.2496	29.8993	15.2746	34.7741	15.2746	25.6744	11.3747	13.9747	14.2996
547	17.2246	16.2496	30.2242	14.9496	34.7741	15.2746	25.9994	10.7247	13.6497	14.2996
548	16.8996	16.2496	30.2242	14.9496	35.0991	14.9496	25.3494	11.0497	13.9747	14.2996
549	17.2246	16.2496	30.2242	14.9496	34.7741	15.5996	25.6744	11.6997	13.6497	14.2996
550	16.8996	16.2496	29.8993	14.6246	34.7741	14.6246	25.9994	11.3747	13.6497	14.2996
551	17.2246	16.2496	29.8993	14.9496	34.7741	15.2746	25.3494	11.0497	13.9747	14.2996
552	17.2246	16.2496	30.2242	14.6246	35.0991	15.5996	25.3494	10.3997	13.9747	14.2996
553	17.2246	15.9246	30.2242	14.6246	34.7741	15.2746	25.6744	11.0497	13.6497	13.9747
554	16.8996	16.2496	29.8993	15.2746	34.7741	14.9496	25.3494	11.0497	13.9747	14.2996
555	17.2246	16.2496	29.8993	15.2746	35.4241	14.6246	25.6744	10.7247	13.9747	14.6246
556	16.8996	16.2496	29.8993	15.2746	35.0991	15.2746	25.3494	10.7247	13.9747	14.2996
557	16.8996	16.2496	30.2242	14.9496	35.0991	15.2746	25.6744	11.6997	13.9747	14.2996
558	17.2246	16.2496	30.2242	14.9496	34.7741	15.5996	25.3494	10.3997	13.9747	14.6246
559	17.2246	15.9246	30.2242	14.9496	35.4241	14.9496	25.3494	10.7247	13.6497	14.2996
560	17.2246	16.2496	30.2242	14.6246	35.0991	15.2746	25.3494	11.0497	13.9747	14.2996
561	17.2246	15.9246	29.8993	14.6246	35.4241	15.5996	25.6744	11.0497	13.6497	14.2996
562	16.8996	16.2496	30.2242	14.6246	35.0991	15.2746	25.9994	11.0497	13.6497	14.2996
563	17.2246	15.9246	30.5492	14.6246	34.7741	15.5996	25.6744	10.3997	13.6497	14.2996
564	17.2246	16.2496	30.5492	14.6246	35.0991	14.9496	25.6744	11.6997	13.6497	14.2996
565	16.8996	15.9246	30.5492	14.6246	34.7741	14.9496	25.3494	11.3747	13.6497	14.6246
566	17.2246	16.2496	30.2242	14.6246	35.4241	14.9496	25.3494	10.7247	13.6497	14.2996
567	16.8996	16.2496	29.8993	14.6246	35.4241	15.2746	25.3494	10.7247	13.6497	14.2996
568	17.2246	16.2496	30.5492	14.9496	35.4241	15.2746	25.3494	10.0747	13.6497	14.2996
569	16.8996	16.2496	29.8993	14.9496	34.7741	14.9496	25.6744	11.0497	13.9747	14.2996
570	16.8996	15.9246	30.2242	14.9496	34.7741	15.2746	25.3494	10.7247	13.6497	14.2996
571	16.8996	16.2496	30.2242	14.6246	34.7741	14.9496	25.6744	11.0497	13.9747	14.6246
572	16.8996	16.2496	30.2242	14.9496	34.7741	14.9496	25.9994	10.7247	13.9747	14.6246
573	16.8996	15.9246	30.5492	14.9496	34.7741	14.9496	25.3494	11.0497	13.9747	14.2996
574	17.2246	15.9246	29.8993	14.9496	35.4241	14.9496	25.6744	10.7247	13.9747	14.6246
575	17.2246	15.9246	30.5492	14.6246	34.7741	14.9496	25.3494	11.6997	13.9747	14.6246
576	16.8996	16.2496	30.5492	14.9496	35.0991	15.2746	25.9994	10.7247	14.2996	14.6246
577	17.2246	16.2496	30.5492	14.9496	34.7741	14.9496	25.3494	10.7247	14.2996	14.6246
578	16.8996	16.2496	30.5492	14.6246	35.0991	14.9496	25.6744	10.7247	14.2996	14.2996
579	17.2246	16.2496	29.8993	14.9496	35.0991	14.9496	25.6744	10.7247	14.2996	14.2996
580	17.2246	16.2496	30.2242	14.9496	35.0991	15.2746	25.3494	10.3997	14.2996	14.6246
581	17.2246	16.2496	30.5492	14.6246	34.7741	14.9496	25.6744	10.7247	14.2996	14.2996
582	16.8996	16.2496	29.8993	14.6246	35.0991	14.9496	25.0244	10.7247	13.9747	14.9496
583	17.2246	16.2496	30.5492	14.6246	35.0991	15.2746	25.3494	11.0497	13.6497	14.6246
584	16.8996	15.9246	30.2242	14.9496	35.0991	14.9496	25.6744	10.7247	13.9747	14.6246
585	16.8996	16.2496	30.5492	14.6246	35.0991	15.2746	25.6744	11.3747	13.9747	14.6246
586	16.8996	15.9246	29.8993	14.6246	35.4241	15.5996	25.6744	11.0497	13.9747	14.6246
587	17.2246	16.2496	30.5492	14.9496	35.0991	14.9496	25.6744	11.0497	13.9747	14.6246
588	16.8996	16.2496	29.8993	14.6246	34.7741	14.9496	25.3494	10.3997	13.9747	14.9496
589	17.2246	16.2496	30.2242	14.2996	35.0991	14.9496	25.6744	10.7247	13.6497	14.9496
590	16.5746	16.2496	29.8993	14.6246	35.0991	14.9496	25.3494	10.7247	13.6497	14.6246
591	16.5746	16.2496	30.5492	14.6246	35.0991	14.9496	25.3494	10.7247	13.6497	14.9496
592	17.2246	16.2496	29.8993	14.6246	35.0991	15.2746	25.6744	10.3997	13.6497	14.9496
593	16.8996	15.9246	30.2242	14.6246	34.7741	15.2746	25.6744	10.3997	13.6497	14.9496
594	16.8996	16.2496	29.8993	14.9496	35.0991	15.2746	25.3494	11.6997	13.6497	14.6246
595	17.2246	16.2496	30.2242	14.6246	34.7741	14.9496	25.3494	10.3997	13.3247	14.9496
596	17.2246	16.2496	29.8993	14.6246	34.7741	14.9496	25.6744	11.3747	13.6497	14.2996
597	16.8996	16.2496	29.8993	14.6246	35.0991	14.9496	25.6744	10.7247	13.3247	14.6246
598	17.2246	16.2496	30.2242	14.6246	35.0991	14.9496	25.9994	10.7247	13.6497	14.6246
599	16.5746	15.9246	30.2242	14.6246	35.0991	15.2746	25.3494	10.3997	13.9747	14.6246
600	16.8996	15.9246	29.8993	14.9496	35.0991	15.2746	25.3494	10.7247	13.9747	14.6246
601	16.8996	16.2496	29.8993	14.6246	35.0991	14.9496	25.6744	10.7247	13.6497	14.6246
602	16.8996	15.9246	30.2242	14.9496	34.7741	15.2746	25.6744	11.0497	13.9747	14.6246
603	17.2246	16.2496	29.8993	14.6246	35.0991	14.9496	25.6744	11.6997	13.3247	14.6246
604	16.8996	16.2496	29.8993	14.9496	34.4491	14.9496	25.3494	10.7247	13.6497	14.6246
605	17.2246	16.2496	30.2242	14.9496	34.7741	14.6246	25.6744	10.7247	13.3247	14.6246
606	17.2246	16.2496	30.2242	14.6246	35.0991	15.2746	25.3494	11.0497	13.6497	14.6246
607	17.2246	16.2496	29.8993	14.6246	35.0991	14.9496	25.3494	11.0497	13.6497	14.2996
608	16.8996	16.2496	30.2242	14.6246	34.7741	14.9496	25.3494	10.7247	13.9747	14.2996
609	16.8996	16.2496	29.8993	14.6246	35.0991	14.6246	25.6744	11.0497	13.3247	14.9496
610	16.8996	15.9246	30.2242	14.6246	35.0991	14.9496	25.0244	10.3997	13.9747	15.2746
611	16.8996	16.2496	30.2242	14.6246	34.7741	15.2746	25.0244	11.0497	13.6497	14.9496
612	16.8996	15.9246	30.2242	14.6246	35.0991	14.9496	25.3494	11.6997	13.6497	14.6246
613	16.5746	16.2496	30.2242	14.9496	35.0991	14.9496	25.3494	11.0497	13.6497	14.6246
614	16.5746	16.2496	29.8993	14.6246	34.7741	14.9496	25.3494	10.7247	13.6497	14.6246
615	16.8996	15.9246	30.2242	14.6246	35.4241	14.9496	25.3494	10.7247	13.9747	14.6246
616	16.8996	16.2496	29.8993	14.9496	35.0991	15.2746	25.6744	11.0497	13.6497	14.6246
617	16.5746	15.9246	29.8993	14.6246	35.0991	14.9496	25.3494	11.0497	13.9747	14.2996
618	16.5746	15.9246	29.8993	14.6246	35.0991	15.5996	25.3494	10.7247	13.9747	14.9496
619	16.5746	15.9246	30.2242	14.6246	35.4241	15.2746	25.6744	11.3747	14.2996	14.6246
620	16.8996	16.2496	29.8993	14.6246	35.0991	14.9496	25.3494	11.0497	13.6497	14.2996
621	16.8996	16.2496	29.8993	14.6246	34.7741	14.9496	25.3494	11.3747	13.9747	14.6246
622	16.5746	15.9246	29.8993	14.9496	35.0991	14.6246	25.3494	10.7247	13.6497	15.2746
623	16.8996	16.2496	30.2242	14.6246	35.0991	15.2746	25.3494	10.7247	13.3247	14.6246
624	16.8996	15.9246	29.8993	14.6246	34.7741	15.2746	25.3494	11.0497	13.6497	14.2996
625	16.8996	16.2496	29.8993	14.6246	35.4241	14.9496	25.3494	11.3747	13.6497	14.6246
626	16.5746	16.2496	29.8993	14.6246	35.0991	14.9496	25.3494	11.0497	13.3247	14.2996
627	16.5746	16.2496	29.8993	14.9496	35.0991	14.9496	25.6744	11.3747	12.6747	14.6246
628	16.8996	16.2496	29.8993	14.9496	35.0991	14.9496	25.3494	10.7247	13.6497	14.2996
629	16.5746	16.2496	29.8993	14.6246	35.4241	14.9496	25.3494	11.0497	13.3247	13.9747
630	16.8996	15.9246	29.8993	14.6246	35.4241	14.9496	25.3494	11.3747	13.6497	14.6246
631	16.5746	16.2496	30.2242	14.9496	35.0991	14.6246	25.3494	11.0497	13.3247	14.2996
632	16.8996	16.2496	30.2242	14.6246	34.7741	15.2746	25.3494	11.3747	13.3247	14.2996
633	16.5746	16.2496	30.2242	14.6246	34.7741	14.9496	25.3494	11.3747	13.6497	14.6246
634	16.5746	16.2496	29.8993	14.6246	34.7741	14.9496	25.3494	11.3747	13.3247	14.2996
635	16.8996	15.9246	29.8993	14.6246	35.0991	14.6246	25.3494	10.7247	12.9997	14.2996
636	16.5746	15.9246	29.5743	14.6246	35.0991	15.2746	25.3494	10.7247	13.3247	14.2996
637	16.2496	16.2496	30.2242	14.9496	35.0991	14.9496	25.3494	11.0497	13.6497	14.6246
638	16.5746	16.2496	30.2242	14.9496	35.4241	14.6246	25.6744	11.0497	13.3247	14.2996
639	16.5746	15.9246	29.8993	15.2746	34.7741	15.2746	25.3494	11.0497	13.6497	14.6246
640	16.2496	16.2496	30.2242	14.6246	35.0991	14.6246	25.3494	11.3747	13.6497	14.2996
641	16.5746	16.2496	29.5743	14.9496	35.0991	15.2746	25.6744	11.0497	13.9747	14.2996
642	16.5746	16.2496	30.2242	14.9496	34.7741	14.9496	25.6744	11.3747	13.3247	14.2996
643	16.5746	16.2496	29.8993	14.9496	35.4241	14.6246	25.3494	11.3747	13.9747	14.2996
644	16.8996	16.2496	30.2242	15.2746	35.0991	14.9496	25.3494	10.7247	13.6497	13.9747
645	16.5746	15.9246	29.8993	14.9496	35.4241	15.2746	25.6744	11.0497	13.9747	13.9747
646	16.5746	16.2496	30.2242	14.9496	35.4241	15.2746	25.6744	11.3747	13.9747	14.2996
647	16.8996	16.2496	30.2242	15.2746	35.4241	14.6246	25.3494	11.0497	13.9747	13.6497
648	16.5746	15.9246	29.8993	14.9496	35.4241	15.2746	25.0244	10.7247	13.3247	13.9747
649	16.8996	16.2496	29.8993	15.2746	35.0991	14.9496	25.3494	11.0497	13.6497	13.6497
650	16.5746	16.2496	30.2242	14.9496	35.0991	14.6246	25.0244	10.7247	13.3247	14.6246
651	16.5746	16.2496	29.8993	14.6246	34.7741	14.9496	25.6744	11.0497	13.9747	14.2996
652	16.5746	16.2496	29.8993	14.9496	34.7741	14.9496	25.3494	10.7247	13.6497	14.2996
653	16.8996	16.2496	29.5743	14.6246	34.4491	14.9496	25.6744	10.7247	13.6497	14.2996
654	16.2496	16.2496	29.8993	14.9496	35.0991	14.9496	25.3494	10.7247	13.3247	13.9747
655	16.5746	16.2496	30.2242	14.9496	35.0991	14.9496	25.3494	10.7247	13.3247	14.2996
656	16.5746	16.2496	30.2242	14.6246	34.7741	14.9496	25.6744	11.0497	13.6497	14.2996
657	16.2496	16.2496	29.8993	14.6246	34.7741	14.9496	25.3494	11.6997	13.6497	14.2996
658	16.5746	16.2496	30.2242	14.6246	35.0991	14.9496	25.3494	11.0497	13.9747	14.2996
659	16.2496	16.2496	29.8993	14.6246	34.7741	14.9496	25.3494	11.0497	13.6497	14.6246
660	16.5746	16.2496	29.8993	14.9496	34.7741	14.9496	25.3494	10.7247	13.3247	14.2996
661	16.5746	16.2496	29.8993	14.6246	35.0991	15.2746	25.3494	11.0497	13.9747	14.6246
662	16.5746	16.2496	29.8993	14.6246	35.0991	15.2746	25.3494	11.0497	13.6497	14.2996
663	16.5746	16.2496	29.8993	14.6246	34.7741	15.2746	25.3494	11.0497	13.3247	14.2996
664	16.8996	16.2496	29.8993	14.9496	34.7741	14.9496	25.3494	11.0497	13.6497	14.6246
665	16.8996	16.2496	29.8993	14.6246	35.0991	15.5996	25.3494	10.7247	13.3247	14.2996
666	16.5746	16.2496	30.2242	14.9496	35.4241	14.9496	25.3494	11.0497	13.6497	14.9496
667	16.2496	16.2496	29.5743	14.9496	35.4241	15.2746	25.3494	10.7247	13.6497	14.2996
668	16.5746	16.2496	29.8993	14.9496	35.0991	15.2746	25.3494	11.3747	13.3247	14.2996
669	16.5746	16.2496	29.8993	14.6246	35.0991	15.2746	25.3494	11.0497	13.6497	14.2996
670	16.5746	16.2496	29.8993	14.6246	35.0991	14.9496	25.3494	10.7247	13.6497	13.9747
671	16.5746	16.2496	29.8993	14.6246	35.0991	15.2746	25.3494	11.0497	13.6497	14.2996
672	16.5746	16.2496	29.5743	14.6246	35.4241	14.9496	25.3494	11.0497	13.3247	14.6246
673	16.8996	16.2496	29.8993	14.6246	34.7741	14.9496	25.3494	11.6997	13.3247	14.2996
674	16.5746	16.2496	29.8993	14.6246	35.4241	14.9496	25.6744	12.0247	13.9747	13.9747
675	16.8996	16.2496	29.8993	14.6246	35.4241	14.9496	25.0244	11.6997	13.6497	14.6246
676	16.5746	16.2496	30.5492	14.9496	34.7741	14.9496	25.3494	11.3747	13.3247	14.2996
677	16.5746	16.2496	29.5743	14.6246	35.0991	14.9496	25.6744	11.3747	13.9747	14.6246
678	16.5746	16.2496	29.8993	14.6246	34.7741	15.2746	25.3494	11.3747	13.3247	14.6246
679	16.8996	16.2496	29.8993	14.6246	35.0991	14.9496	25.3494	12.0247	13.6497	14.2996
680	16.5746	16.2496	30.2242	14.6246	34.7741	14.9496	25.3494	11.0497	13.3247	14.2996
681	16.5746	16.2496	29.8993	14.9496	35.0991	14.9496	25.3494	11.6997	13.3247	13.9747
682	16.5746	16.2496	29.8993	14.6246	35.4241	14.9496	25.3494	11.3747	13.9747	14.2996
683	16.8996	16.2496	30.2242	14.6246	34.7741	15.2746	25.6744	11.6997	13.6497	13.9747
684	16.8996	16.2496	29.8993	14.6246	35.0991	14.9496	25.6744	11.6997	13.3247	14.2996
685	16.8996	16.2496	29.8993	14.6246	35.0991	14.9496	25.3494	11.0497	13.3247	13.9747
686	16.5746	16.2496	29.8993	14.9496	35.4241	14.9496	25.3494	11.0497	13.3247	14.6246
687	16.8996	15.9246	29.8993	14.6246	34.7741	14.9496	25.3494	10.7247	12.9997	14.2996
688	16.8996	16.2496	29.8993	14.6246	34.7741	14.9496	25.3494	11.0497	13.3247	14.2996
689	16.8996	16.2496	30.2242	14.6246	34.7741	14.6246	25.3494	10.7247	13.3247	14.6246
690	16.8996	16.2496	29.8993	14.9496	34.7741	15.2746	25.3494	11.0497	13.3247	14.2996
691	16.8996	16.2496	29.8993	14.9496	35.4241	14.9496	25.3494	11.6997	13.6497	13.9747
692	16.5746	16.2496	29.5743	14.6246	34.7741	14.9496	25.3494	11.3747	13.6497	14.2996
693	16.8996	16.2496	30.2242	14.6246	34.7741	14.9496	25.3494	12.0247	13.3247	14.2996
694	16.5746	16.2496	29.8993	14.6246	34.7741	14.9496	25.3494	11.6997	13.3247	13.9747
695	16.8996	16.2496	29.5743	14.6246	35.0991	14.9496	25.0244	11.3747	12.9997	14.2996
696	16.8996	16.2496	30.2242	14.6246	35.0991	14.6246	25.3494	11.0497	12.9997	13.9747
697	16.5746	16.2496	30.2242	14.6246	34.7741	14.9496	25.6744	10.7247	13.3247	14.2996
698	16.8996	16.2496	29.8993	14.6246	35.0991	14.9496	25.3494	11.3747	12.9997	14.2996
699	16.8996	16.2496	30.2242	14.6246	35.0991	15.2746	25.3494	11.6997	12.9997	14.6246
700	16.8996	16.2496	30.2242	14.6246	35.0991	14.9496	25.3494	11.0497	13.3247	14.6246
701	16.8996	16.2496	30.2242	14.6246	35.0991	14.9496	25.3494	11.3747	13.3247	14.2996
702	16.8996	16.2496	30.2242	14.6246	35.4241	14.9496	25.6744	11.3747	13.3247	13.9747
703	16.8996	16.2496	30.2242	14.9496	35.0991	15.2746	25.6744	11.3747	13.6497	14.2996
704	16.8996	16.2496	29.8993	14.6246	35.0991	14.9496	25.3494	11.6997	13.3247	13.9747
705	16.8996	16.2496	29.8993	14.6246	35.0991	14.9496	25.3494	12.0247	13.6497	14.2996
706	16.8996	16.2496	29.8993	14.6246	34.7741	14.9496	25.3494	11.3747	13.6497	14.2996
707	16.8996	16.2496	29.8993	14.6246	35.4241	14.9496	25.3494	11.3747	13.6497	13.9747
708	16.8996	16.5746	29.8993	14.6246	35.4241	14.9496	25.3494	11.6997	13.6497	13.9747
709	16.8996	16.2496	29.5743	14.6246	35.0991	14.9496	25.9994	12.6747	13.9747	13.9747
710	16.8996	16.2496	29.8993	14.6246	35.0991	15.2746	25.3494	11.3747	13.3247	14.2996
711	16.8996	16.2496	30.2242	14.6246	35.0991	14.9496	25.3494	12.0247	13.6497	14.2996
712	16.8996	16.2496	29.8993	14.6246	35.4241	15.2746	25.3494	11.0497	13.9747	13.9747
713	16.8996	16.2496	29.8993	14.6246	34.7741	14.9496	25.6744	11.0497	13.6497	13.9747
714	16.8996	16.2496	30.2242	14.6246	35.0991	14.9496	25.3494	11.0497	13.9747	13.9747
715	16.8996	16.2496	29.8993	14.6246	34.7741	14.9496	25.6744	11.6997	13.6497	14.2996
716	16.8996	16.2496	29.8993	14.6246	34.7741	14.6246	25.6744	11.0497	13.6497	13.9747
717	16.5746	16.2496	29.8993	14.6246	35.4241	14.6246	25.3494	11.3747	13.3247	13.9747
718	16.5746	16.2496	30.2242	14.6246	34.7741	14.9496	25.6744	12.0247	13.6497	14.2996
719	16.8996	16.2496	29.8993	14.6246	34.7741	14.9496	25.6744	11.3747	13.6497	14.6246
720	16.8996	16.2496	29.8993	14.6246	34.7741	15.2746	25.6744	11.0497	13.6497	13.9747
721	16.8996	16.2496	29.8993	14.6246	35.0991	14.9496	25.6744	11.6997	13.9747	14.2996
722	16.8996	16.2496	29.5743	14.6246	35.0991	15.2746	25.6744	11.3747	13.6497	15.2746
723	16.8996	16.2496	29.8993	14.6246	35.4241	14.9496	25.6744	12.0247	13.6497	14.9496
724	16.8996	16.2496	29.8993	14.6246	35.0991	14.9496	25.6744	11.6997	13.6497	14.6246
725	16.8996	16.2496	29.8993	14.2996	35.0991	15.2746	25.3494	12.3497	13.6497	15.2746
726	16.5746	16.2496	29.8993	14.6246	35.4241	14.9496	25.3494	11.3747	13.6497	14.9496
727	16.8996	16.2496	30.2242	14.6246	35.4241	14.6246	25.3494	11.3747	13.6497	14.6246
728	16.8996	16.2496	29.8993	14.6246	34.7741	15.2746	25.6744	12.0247	13.6497	15.2746
729	16.5746	16.2496	29.8993	14.6246	34.7741	15.2746	25.3494	12.0247	13.6497	14.9496
730	16.8996	16.2496	29.5743	14.6246	34.7741	14.9496	25.6744	12.6747	13.6497	14.9496
731	16.5746	16.2496	29.8993	14.6246	34.7741	14.9496	25.3494	12.0247	13.6497	14.9496
732	16.5746	16.2496	29.5743	14.6246	35.4241	14.9496	25.6744	12.0247	13.9747	14.6246
733	16.8996	16.2496	29.5743	14.6246	34.7741	14.6246	25.6744	11.6997	13.9747	15.2746
734	16.5746	16.2496	30.2242	14.6246	34.7741	14.6246	25.6744	11.3747	14.2996	14.9496
735	16.8996	16.2496	29.8993	14.6246	35.0991	14.6246	25.6744	11.3747	13.6497	14.9496
736	16.8996	16.2496	30.2242	14.6246	34.7741	14.9496	25.6744	11.0497	13.6497	14.6246
737	16.8996	16.2496	30.2242	14.6246	35.0991	14.6246	25.6744	11.6997	13.9747	14.9496
738	16.8996	16.2496	30.2242	14.6246	35.4241	15.2746	25.3494	12.0247	13.9747	14.9496
739	16.8996	16.2496	29.8993	14.2996	35.4241	14.6246	25.3494	11.6997	13.9747	14.9496
740	16.5746	16.2496	29.8993	14.6246	35.0991	14.6246	25.6744	11.3747	13.6497	14.9496
741	16.8996	16.2496	29.8993	14.6246	35.0991	14.9496	25.9994	11.3747	13.9747	14.9496
742	16.8996	16.2496	29.8993	14.2996	35.0991	14.6246	25.6744	11.6997	13.6497	14.9496
743	16.5746	16.2496	29.8993	14.6246	35.0991	14.9496	25.6744	12.0247	13.6497	14.6246
744	16.8996	16.2496	30.2242	14.6246	35.0991	15.2746	25.6744	11.3747	13.6497	15.2746
745	16.8996	16.2496	29.5743	14.6246	34.7741	14.9496	25.3494	11.0497	13.6497	14.9496
746	16.8996	16.2496	30.2242	14.6246	35.0991	14.9496	25.3494	12.0247	13.9747	15.2746
747	16.5746	16.2496	29.8993	14.6246	35.4241	15.2746	25.3494	11.6997	13.9747	14.9496
748	16.8996	16.2496	29.8993	14.6246	35.0991	14.9496	25.3494	12.0247	13.6497	14.6246
749	16.8996	16.2496	29.8993	14.6246	35.0991	14.9496	25.0244	11.0497	13.9747	14.9496
750	16.8996	16.2496	30.2242	14.6246	34.7741	14.9496	25.3494	11.6997	13.6497	14.9496
751	16.8996	16.2496	29.8993	14.6246	34.7741	14.9496	25.3494	11.3747	13.6497	14.9496
752	16.8996	16.2496	29.8993	14.6246	34.7741	14.9496	25.6744	11.3747	13.3247	14.9496
753	16.8996	16.2496	29.8993	14.6246	35.0991	14.9496	25.6744	11.3747	13.3247	14.6246
754	16.8996	16.2496	30.2242	14.6246	34.7741	14.9496	25.3494	12.0247	13.6497	14.6246
755	17.2246	16.2496	29.8993	14.6246	34.7741	14.9496	25.6744	11.3747	13.6497	14.9496
756	16.8996	16.2496	29.8993	14.6246	35.0991	14.6246	25.3494	11.6997	13.6497	14.6246
757	17.2246	16.2496	29.8993	14.6246	35.0991	15.2746	25.3494	12.3497	13.9747	13.6497
758	16.8996	16.2496	29.5743	14.6246	35.0991	14.9496	25.6744	11.6997	13.6497	14.9496
759	16.8996	16.2496	29.8993	14.6246	35.0991	15.2746	25.6744	11.6997	13.9747	14.6246
760	16.8996	16.2496	29.8993	14.6246	34.7741	15.2746	25.3494	11.6997	13.6497	14.6246
761	16.8996	16.2496	30.2242	14.6246	34.7741	14.9496	25.3494	11.6997	13.6497	14.2996
762	16.8996	16.2496	30.2242	14.6246	34.7741	14.9496	25.3494	11.6997	13.6497	14.9496
763	16.8996	16.2496	29.8993	14.6246	35.0991	14.9496	25.6744	12.3497	13.6497	13.3247
764	16.8996	16.2496	29.8993	14.6246	34.7741	14.9496	25.0244	11.6997	13.3247	15.2746
765	16.8996	16.5746	29.8993	14.6246	34.7741	14.9496	25.6744	12.0247	13.3247	14.6246
766	16.8996	16.2496	29.5743	14.6246	34.7741	14.9496	25.3494	11.6997	13.6497	14.9496
767	16.8996	16.2496	30.2242	14.6246	35.4241	15.2746	25.6744	11.6997	13.6497	14.6246
768	16.8996	16.5746	29.5743	14.6246	34.7741	15.2746	25.6744	11.6997	13.9747	14.6246
769	16.5746	16.2496	29.8993	14.9496	34.7741	15.2746	25.6744	11.6997	13.6497	14.6246
770	16.8996	15.9246	30.2242	14.6246	34.7741	14.9496	25.3494	10.7247	13.6497	13.6497
771	16.8996	16.2496	29.8993	14.6246	34.7741	14.9496	25.6744	11.3747	13.6497	14.6246
772	16.8996	16.2496	29.8993	14.6246	35.0991	15.2746	25.6744	12.0247	13.6497	14.6246
773	16.8996	16.2496	29.8993	14.9496	35.0991	14.9496	25.6744	11.3747	13.3247	14.2996
774	16.5746	16.2496	29.8993	14.6246	34.7741	14.6246	25.6744	12.3497	13.6497	14.2996
775	16.8996	16.2496	29.8993	14.6246	34.7741	14.9496	25.3494	11.6997	13.6497	13.6497
776	16.8996	16.5746	29.8993	14.6246	35.0991	14.9496	25.6744	11.0497	13.6497	13.9747
777	16.8996	16.2496	29.8993	14.6246	34.7741	15.2746	25.3494	12.6747	13.9747	13.3247
778	16.5746	15.9246	29.8993	14.6246	34.7741	15.2746	25.3494	12.0247	13.3247	13.9747
779	16.8996	16.5746	29.8993	14.9496	35.4241	14.9496	25.3494	11.3747	13.3247	14.2996
780	16.8996	16.2496	29.5743	14.6246	34.7741	14.6246	25.3494	11.3747	12.9997	14.6246
781	16.8996	16.2496	29.8993	14.6246	34.7741	15.2746	25.6744	11.6997	13.3247	13.9747
782	16.8996	16.2496	29.8993	14.6246	35.0991	14.9496	25.6744	11.6997	13.3247	14.2996
783	16.8996	16.5746	29.8993	14.6246	35.0991	14.9496	25.6744	11.0497	13.3247	14.2996
784	16.8996	16.2496	29.5743	14.9496	35.4241	15.2746	25.9994	11.6997	12.6747	14.2996
785	16.8996	16.2496	29.8993	14.6246	35.0991	14.9496	25.3494	11.6997	12.9997	14.6246
786	16.8996	16.2496	29.8993	14.6246	35.0991	14.9496	25.6744	11.3747	13.3247	14.2996
787	16.5746	16.2496	29.8993	14.6246	35.4241	14.9496	25.3494	10.7247	12.6747	14.6246
788	16.8996	16.2496	30.2242	14.6246	34.7741	15.2746	25.6744	11.3747	12.6747	13.9747
789	16.8996	16.5746	29.5743	14.6246	35.0991	15.2746	25.3494	11.0497	12.9997	13.9747
790	16.5746	16.5746	29.8993	14.6246	34.7741	14.9496	25.3494	11.6997	12.9997	13.3247
791	16.8996	15.9246	29.8993	14.6246	34.7741	15.2746	25.6744	12.3497	12.9997	13.6497
792	16.8996	16.5746	29.8993	14.6246	34.7741	14.9496	25.3494	11.0497	12.9997	13.6497
793	16.8996	16.5746	29.8993	14.6246	35.0991	14.6246	25.3494	11.0497	12.6747	14.2996
794	16.8996	16.2496	29.5743	14.6246	35.0991	14.9496	25.3494	11.3747	12.6747	13.9747
795	16.8996	16.2496	29.5743	14.6246	34.7741	15.2746	25.3494	12.3497	12.9997	14.6246
796	16.8996	16.2496	29.5743	14.6246	35.4241	14.9496	25.6744	11.6997	12.6747	14.6246
797	16.8996	16.2496	29.8993	14.6246	34.7741	14.6246	25.3494	11.6997	12.9997	14.6246
798	16.8996	16.2496	29.8993	14.6246	35.0991	14.9496	25.9994	12.0247	12.6747	15.2746
799	16.8996	16.2496	29.5743	14.6246	34.7741	14.6246	25.6744	12.0247	13.3247	14.2996
800	16.8996	16.2496	29.5743	14.6246	34.7741	15.2746	25.3494	12.0247	12.9997	14.6246
801	16.8996	16.2496	29.5743	14.6246	34.7741	14.6246	25.3494	12.0247	13.3247	15.2746
802	16.8996	16.2496	29.8993	14.6246	34.7741	14.9496	25.3494	11.6997	12.9997	15.2746
803	16.8996	16.2496	29.8993	14.6246	34.7741	14.9496	25.6744	11.6997	13.3247	14.2996
804	16.8996	16.5746	29.8993	14.6246	35.0991	15.2746	25.3494	12.3497	12.6747	13.9747
805	16.8996	16.5746	29.8993	14.6246	35.0991	14.9496	25.6744	12.0247	13.3247	14.9496
806	16.8996	16.2496	29.8993	14.6246	35.0991	14.6246	25.6744	11.6997	13.6497	14.9496
807	16.5746	16.5746	29.8993	14.6246	34.7741	14.9496	25.3494	11.6997	13.3247	14.9496
808	16.8996	16.5746	29.5743	14.6246	34.7741	14.9496	25.3494	11.6997	13.3247	14.9496
809	16.8996	16.2496	29.5743	14.6246	35.0991	14.9496	25.6744	12.0247	13.3247	15.2746
810	16.8996	16.2496	29.5743	14.6246	35.0991	14.6246	25.3494	11.6997	13.3247	14.6246
811	16.8996	16.2496	29.8993	14.9496	34.7741	15.2746	25.3494	12.6747	12.9997	14.6246
812	16.8996	16.5746	30.2242	14.6246	35.4241	14.6246	25.9994	11.6997	12.9997	14.6246
813	16.8996	16.2496	29.8993	14.6246	34.7741	15.2746	25.6744	12.3497	13.3247	14.9496
814	16.8996	16.2496	29.8993	14.6246	34.7741	14.6246	25.3494	12.3497	13.3247	14.2996
815	16.8996	16.5746	29.5743	14.6246	34.7741	14.9496	25.6744	11.6997	13.3247	14.6246
816	16.5746	16.5746	29.5743	14.6246	35.0991	14.6246	25.3494	11.6997	12.9997	14.6246
817	17.2246	16.2496	29.5743	14.6246	35.0991	15.2746	25.6744	12.0247	12.9997	14.6246
818	17.2246	16.5746	29.5743	14.6246	34.7741	14.9496	25.3494	12.0247	12.9997	14.2996
819	16.8996	16.2496	29.5743	14.6246	34.4491	15.2746	25.6744	12.0247	12.9997	14.6246
820	16.8996	16.2496	29.5743	14.6246	35.0991	15.2746	25.3494	11.6997	13.3247	14.2996
821	16.8996	16.5746	30.2242	14.6246	35.0991	14.6246	25.6744	11.6997	13.6497	14.6246
822	16.8996	16.2496	29.8993	14.6246	34.7741	14.6246	25.3494	11.6997	12.9997	13.9747
823	16.8996	16.2496	29.8993	14.6246	35.0991	14.6246	25.6744	11.6997	13.6497	13.9747
824	16.8996	16.2496	29.5743	14.6246	34.7741	14.6246	25.3494	11.3747	13.3247	13.9747
825	16.5746	16.5746	29.8993	14.6246	34.7741	15.2746	25.3494	12.3497	12.9997	14.6246
826	16.8996	16.5746	29.5743	14.6246	35.0991	14.6246	25.6744	12.0247	12.6747	14.2996
827	16.8996	16.2496	29.8993	14.6246	35.0991	14.6246	25.6744	11.3747	13.6497	14.2996
828	17.2246	16.2496	29.5743	14.6246	34.7741	14.6246	25.6744	11.3747	12.9997	14.2996
829	16.8996	16.2496	29.5743	14.6246	35.0991	14.9496	25.3494	12.0247	12.9997	14.6246
830	16.8996	16.2496	29.5743	14.6246	35.0991	14.6246	25.3494	12.0247	12.9997	14.6246
831	16.8996	16.5746	29.8993	14.6246	35.0991	14.9496	25.3494	11.6997	12.9997	14.6246
832	16.8996	16.2496	29.5743	14.6246	35.0991	15.2746	25.3494	11.6997	12.9997	14.6246
833	16.5746	16.5746	29.8993	14.2996	34.7741	14.6246	25.0244	12.0247	13.3247	14.6246
834	17.2246	16.5746	29.8993	14.6246	35.0991	14.6246	25.6744	12.0247	12.9997	14.2996
835	16.5746	16.5746	29.5743	14.6246	34.7741	14.9496	25.3494	11.6997	13.3247	13.3247
836	16.8996	16.5746	29.5743	14.6246	35.0991	14.6246	25.6744	11.6997	12.9997	14.2996
837	16.8996	16.2496	29.5743	14.6246	34.7741	15.2746	25.0244	11.6997	12.9997	14.6246
838	17.2246	15.9246	29.5743	14.6246	34.7741	15.2746	25.3494	11.6997	13.3247	14.6246
839	16.8996	16.2496	29.5743	14.6246	35.0991	14.6246	25.3494	12.3497	13.3247	14.2996
840	16.5746	16.5746	29.5743	14.6246	34.7741	14.9496	25.6744	12.0247	13.3247	13.9747
841	17.2246	16.2496	29.8993	14.2996	35.0991	14.9496	25.6744	11.6997	12.9997	14.6246
842	16.8996	16.2496	29.5743	14.6246	34.7741	14.9496	25.3494	11.6997	13.3247	14.6246
843	16.8996	16.5746	29.5743	14.6246	34.7741	14.9496	25.6744	11.6997	12.9997	14.2996
844	16.8996	16.2496	29.5743	14.6246	34.7741	14.9496	25.3494	12.0247	12.9997	13.9747
845	16.8996	16.2496	30.2242	14.6246	35.0991	14.6246	25.6744	11.3747	12.9997	14.2996
846	16.5746	16.2496	29.5743	14.6246	34.7741	14.6246	25.3494	12.0247	13.6497	14.6246
847	16.8996	16.2496	29.5743	14.6246	34.7741	14.9496	25.3494	11.6997	13.3247	13.9747
848	16.5746	16.5746	29.5743	14.6246	35.4241	14.9496	25.0244	11.6997	12.9997	13.9747
849	16.5746	16.5746	29.2493	14.6246	34.7741	14.9496	25.6744	11.6997	12.9997	13.9747
850	16.8996	16.2496	29.5743	14.6246	35.0991	14.9496	25.3494	12.0247	12.9997	14.2996
851	16.8996	16.2496	29.8993	14.6246	34.7741	14.9496	25.6744	11.6997	12.9997	14.2996
852	16.5746	16.5746	29.8993	14.6246	35.0991	14.9496	25.6744	11.3747	12.9997	14.2996
853	16.8996	16.2496	29.5743	14.6246	34.7741	14.9496	25.0244	11.6997	13.3247	13.9747
854	16.5746	16.2496	29.5743	14.6246	35.0991	15.2746	25.6744	11.3747	12.9997	14.2996
855	16.5746	16.5746	30.2242	14.2996	35.0991	14.6246	25.6744	11.6997	12.9997	14.2996
856	16.8996	16.2496	29.8993	14.6246	34.7741	14.6246	25.3494	11.6997	12.9997	13.9747
857	16.8996	16.5746	29.8993	14.6246	34.7741	14.9496	25.3494	11.3747	13.3247	13.9747
858	16.5746	15.9246	29.5743	14.6246	35.0991	14.9496	25.6744	11.3747	12.9997	13.9747
859	16.8996	16.5746	29.5743	14.6246	34.7741	14.9496	25.6744	11.6997	12.9997	14.2996
860	16.5746	16.5746	29.8993	14.6246	34.7741	14.2996	25.6744	11.6997	12.9997	13.9747
861	16.5746	16.5746	29.5743	14.2996	34.7741	14.6246	25.6744	12.0247	12.9997	13.9747
862	16.8996	16.5746	29.5743	14.6246	35.0991	14.9496	25.6744	12.0247	12.9997	13.6497
863	16.5746	16.2496	29.5743	14.2996	34.7741	14.9496	25.6744	11.3747	12.9997	13.9747
864	16.8996	16.5746	28.9243	14.2996	35.0991	14.6246	25.3494	11.6997	12.6747	13.6497
865	16.5746	15.9246	29.5743	14.6246	34.7741	14.9496	25.6744	11.6997	12.9997	13.9747
866	16.5746	16.2496	29.5743	14.2996	34.7741	14.6246	25.6744	11.6997	12.9997	13.6497
867	16.8996	16.5746	29.5743	14.6246	34.7741	14.2996	25.3494	12.0247	12.6747	13.9747
868	16.5746	16.5746	29.5743	14.6246	34.7741	14.6246	25.6744	12.3497	12.9997	13.9747
869	16.5746	16.5746	29.8993	14.6246	35.4241	15.2746	25.6744	12.6747	12.9997	13.6497
870	16.5746	16.2496	29.8993	14.2996	34.7741	14.6246	25.6744	11.6997	13.3247	13.9747
871	16.5746	16.5746	29.8993	14.2996	35.0991	14.9496	25.3494	12.0247	12.9997	13.3247
872	16.5746	16.5746	29.5743	14.2996	34.7741	14.9496	25.0244	11.6997	13.3247	13.6497
873	16.5746	15.9246	29.5743	14.2996	35.0991	14.6246	25.3494	11.6997	12.9997	13.9747
874	16.8996	16.2496	29.5743	14.6246	34.7741	14.6246	25.3494	11.6997	13.3247	13.6497
875	16.5746	16.5746	29.8993	14.2996	34.7741	14.6246	25.6744	12.0247	13.3247	13.6497
876	16.5746	16.2496	29.5743	13.9747	34.7741	14.6246	25.6744	11.3747	13.3247	13.9747
877	16.8996	16.2496	29.8993	14.6246	34.7741	14.6246	25.3494	12.0247	13.3247	13.9747
878	16.5746	16.5746	29.8993	14.2996	34.7741	14.6246	25.3494	12.0247	12.9997	13.3247
879	16.5746	16.2496	29.5743	14.2996	34.7741	14.6246	25.3494	11.3747	13.3247	13.9747
880	16.2496	16.2496	29.8993	14.2996	34.7741	15.2746	25.6744	11.6997	13.3247	13.6497
881	16.8996	16.2496	29.5743	14.6246	35.0991	14.9496	25.3494	11.6997	13.3247	13.6497
882	16.8996	16.2496	29.8993	14.2996	34.7741	14.6246	25.3494	11.6997	13.3247	13.6497
883	16.5746	16.5746	29.5743	14.2996	34.7741	14.9496	25.3494	11.3747	12.9997	13.9747
884	16.5746	16.2496	30.2242	14.6246	35.0991	14.9496	25.3494	12.3497	13.3247	13.9747
885	16.8996	16.2496	29.5743	14.6246	34.7741	14.6246	25.3494	12.0247	12.9997	13.6497
886	16.5746	16.2496	29.8993	14.6246	34.7741	14.6246	25.3494	11.3747	13.3247	13.6497
887	16.5746	16.5746	29.8993	14.2996	34.7741	14.9496	25.3494	12.0247	13.3247	13.3247
888	16.8996	16.5746	29.5743	14.6246	35.0991	14.6246	25.3494	11.6997	12.9997	13.3247
889	16.5746	16.2496	29.5743	14.2996	35.0991	15.2746	25.3494	11.3747	13.3247	13.6497
890	16.5746	16.5746	29.8993	14.6246	34.7741	14.6246	25.3494	11.6997	13.3247	13.6497
891	16.5746	16.2496	29.5743	14.6246	34.7741	14.6246	25.0244	11.6997	13.3247	13.3247
892	16.5746	16.5746	29.8993	14.6246	35.0991	14.9496	25.6744	12.0247	12.9997	13.6497
893	16.8996	16.2496	29.5743	14.2996	35.0991	14.9496	25.3494	11.6997	12.9997	13.3247
894	16.5746	16.5746	29.5743	14.6246	34.7741	14.6246	25.3494	11.6997	13.6497	13.3247
895	16.8996	15.9246	29.5743	14.2996	35.0991	14.6246	25.3494	11.3747	13.3247	13.3247
896	16.8996	16.2496	29.8993	14.6246	34.4491	14.9496	25.6744	12.0247	13.3247	13.3247
897	16.5746	16.5746	29.5743	14.2996	34.7741	14.9496	25.3494	11.6997	13.3247	13.3247
898	16.5746	16.2496	29.8993	14.2996	34.7741	14.9496	25.3494	11.6997	12.9997	12.9997
899	16.5746	16.5746	29.8993	14.6246	34.7741	15.2746	25.6744	11.6997	13.6497	13.6497
900	16.8996	16.5746	29.8993	14.2996	35.0991	14.9496	25.3494	12.0247	13.3247	13.6497
901	16.5746	16.2496	29.8993	14.6246	34.7741	14.9496	25.3494	11.0497	13.3247	12.9997
902	16.5746	16.2496	29.5743	14.2996	34.7741	15.2746	25.3494	12.0247	13.6497	13.6497
903	16.5746	15.9246	29.8993	14.6246	35.0991	14.9496	25.3494	12.3497	13.3247	12.9997
904	16.5746	15.9246	29.8993	13.9747	34.7741	14.9496	25.3494	11.0497	13.3247	13.3247
905	16.8996	16.2496	29.2493	14.6246	34.7741	14.6246	25.3494	12.0247	13.6497	13.3247
906	16.5746	16.2496	29.2493	14.2996	34.7741	14.9496	25.3494	11.6997	12.9997	13.3247
907	16.5746	15.9246	29.5743	14.6246	34.7741	15.2746	25.6744	11.6997	13.3247	12.9997
908	16.5746	16.5746	29.5743	14.2996	34.7741	14.9496	25.3494	11.3747	13.3247	12.9997
909	16.5746	16.5746	29.5743	13.9747	34.7741	14.9496	25.6744	11.6997	12.9997	13.3247
910	16.5746	16.2496	29.8993	14.6246	34.7741	14.9496	25.6744	11.6997	12.9997	13.3247
911	16.5746	16.5746	29.8993	14.6246	34.7741	14.9496	25.3494	11.3747	12.9997	13.3247
912	16.5746	16.5746	29.5743	14.6246	34.7741	14.9496	25.3494	11.6997	13.3247	12.9997
913	16.5746	16.2496	29.5743	14.6246	35.0991	14.9496	25.3494	12.0247	13.3247	13.3247
914	16.5746	16.5746	29.5743	14.6246	34.7741	14.9496	25.3494	11.3747	12.9997	12.9997
915	16.2496	16.5746	29.5743	14.6246	34.7741	14.9496	25.3494	11.6997	13.3247	12.9997
916	16.5746	16.2496	29.8993	14.6246	35.0991	14.6246	25.6744	11.3747	12.9997	13.3247
917	16.8996	16.2496	29.5743	14.6246	35.0991	14.9496	25.3494	11.0497	13.6497	13.3247
918	16.5746	15.9246	29.8993	14.6246	35.0991	14.6246	25.3494	11.6997	13.3247	12.9997
919	16.5746	16.2496	29.8993	14.6246	34.7741	14.6246	25.3494	11.6997	12.9997	12.9997
920	16.5746	15.9246	29.5743	14.2996	34.7741	14.9496	25.3494	12.0247	13.3247	12.9997
921	16.5746	15.9246	29.8993	14.6246	35.0991	14.6246	25.3494	11.3747	12.9997	12.9997
922	16.8996	16.2496	29.5743	14.6246	34.7741	14.6246	25.3494	11.3747	12.9997	13.3247
923	16.5746	16.5746	29.5743	14.6246	34.7741	14.6246	25.6744	11.3747	12.9997	13.6497
924	16.5746	15.9246	30.2242	14.6246	35.0991	15.2746	25.3494	11.6997	13.3247	13.6497
925	16.5746	16.5746	29.8993	14.6246	34.7741	14.6246	25.6744	11.3747	13.6497	13.6497
926	16.5746	16.2496	29.5743	14.6246	34.7741	14.6246	25.3494	11.3747	12.9997	13.6497
927	16.5746	16.2496	29.5743	14.6246	34.7741	15.2746	25.3494	11.6997	13.3247	13.6497
928	16.5746	16.5746	29.5743	14.6246	34.7741	14.9496	25.3494	11.6997	13.3247	13.6497
929	16.5746	15.9246	29.8993	14.6246	34.7741	14.9496	25.3494	10.7247	12.9997	13.3247
930	16.5746	16.5746	29.5743	14.6246	35.0991	14.6246	25.3494	11.6997	13.6497	13.3247
931	16.5746	15.9246	29.8993	14.2996	34.7741	14.9496	25.3494	11.6997	13.3247	13.6497
932	16.2496	16.2496	29.8993	14.6246	34.7741	14.9496	25.3494	11.6997	13.9747	13.3247
933	16.8996	16.2496	29.5743	14.6246	34.7741	14.2996	25.3494	11.0497	13.3247	13.6497
934	16.5746	16.5746	29.5743	14.6246	34.7741	14.9496	25.3494	11.6997	12.9997	12.9997
935	16.8996	16.2496	29.8993	14.6246	35.0991	14.9496	25.6744	11.3747	13.3247	13.3247
936	16.5746	16.2496	29.5743	14.6246	35.0991	15.2746	25.6744	11.6997	13.6497	13.3247
937	16.5746	16.2496	29.5743	14.6246	35.0991	14.9496	25.3494	11.6997	13.3247	13.6497
938	16.5746	16.2496	29.8993	14.6246	34.7741	14.9496	25.3494	12.3497	13.3247	12.9997
939	16.2496	15.9246	29.8993	14.6246	34.7741	15.2746	25.3494	11.3747	13.6497	13.3247
940	16.8996	15.9246	29.5743	14.6246	34.7741	14.9496	25.3494	11.6997	13.6497	13.3247
941	16.2496	16.5746	29.5743	14.6246	34.7741	14.9496	25.3494	11.6997	13.3247	13.3247
942	16.5746	16.2496	29.5743	14.6246	35.0991	14.9496	25.3494	12.0247	12.9997	13.3247
943	16.2496	16.5746	29.5743	14.6246	34.7741	15.2746	25.3494	11.6997	12.9997	13.3247
944	16.5746	16.2496	29.5743	14.6246	34.7741	14.9496	25.6744	11.3747	12.9997	13.3247
945	16.8996	16.2496	29.8993	14.6246	35.0991	15.2746	25.3494	11.6997	12.9997	12.9997
946	16.2496	16.5746	29.5743	14.6246	34.7741	14.9496	25.0244	11.3747	12.6747	13.3247
947	16.2496	16.2496	29.8993	14.6246	34.7741	15.2746	25.6744	12.3497	12.6747	13.3247
948	16.8996	16.2496	29.5743	14.6246	34.7741	14.9496	25.3494	12.6747	13.3247	12.9997
949	16.5746	16.2496	29.8993	14.6246	34.7741	14.9496	25.3494	11.6997	13.3247	13.3247
950	16.5746	16.2496	29.5743	14.6246	34.7741	14.9496	25.6744	12.3497	12.9997	12.9997
951	16.5746	16.2496	29.5743	14.6246	34.7741	14.6246	25.3494	12.3497	13.3247	12.6747
952	16.5746	16.2496	29.2493	14.6246	34.7741	14.6246	25.6744	12.0247	13.3247	12.9997
953	16.5746	16.2496	29.2493	14.9496	34.7741	14.6246	25.3494	12.6747	13.3247	12.9997
954	16.5746	16.5746	29.5743	14.9496	34.7741	14.6246	25.3494	11.6997	13.3247	13.3247
955	16.5746	16.5746	29.5743	14.6246	34.7741	14.2996	25.3494	11.6997	12.9997	12.9997
956	16.5746	16.5746	28.9243	14.9496	34.7741	14.6246	25.3494	11.6997	13.9747	13.3247
957	16.5746	16.5746	29.5743	14.9496	35.0991	14.9496	25.3494	12.0247	13.3247	13.6497
958	16.5746	15.9246	29.5743	14.9496	34.7741	14.9496	25.6744	11.6997	12.6747	13.3247
959	16.5746	16.5746	29.5743	14.9496	34.4491	14.9496	25.3494	12.0247	12.6747	13.3247
960	16.5746	16.2496	29.8993	14.9496	35.0991	14.6246	25.3494	11.6997	12.9997	13.3247
961	16.5746	16.5746	29.2493	14.9496	34.7741	14.6246	25.6744	11.3747	13.3247	13.6497
962	16.5746	16.5746	29.8993	14.9496	34.7741	14.2996	25.3494	11.6997	12.9997	13.6497
963	16.5746	16.2496	29.8993	14.9496	34.7741	15.2746	25.3494	12.0247	12.6747	13.6497
964	16.5746	16.5746	29.5743	14.9496	35.0991	14.9496	25.6744	11.6997	12.6747	13.3247
965	16.5746	16.5746	29.2493	14.9496	35.0991	14.9496	25.3494	11.6997	12.9997	12.9997
966	16.5746	16.2496	29.5743	14.9496	34.4491	14.6246	25.3494	11.6997	12.9997	12.9997
967	16.5746	16.2496	29.5743	14.9496	34.4491	14.6246	25.0244	12.0247	12.9997	12.9997
968	16.5746	16.2496	29.5743	14.9496	34.7741	14.6246	25.3494	11.6997	12.6747	13.3247
969	16.5746	16.5746	29.2493	14.9496	34.7741	14.9496	25.3494	11.6997	12.9997	13.3247
970	16.2496	16.2496	29.2493	14.9496	34.7741	14.2996	25.6744	11.6997	13.3247	12.9997
971	16.5746	16.2496	29.2493	14.6246	34.7741	14.6246	25.3494	11.3747	12.6747	13.3247
972	16.5746	16.2496	29.5743	14.9496	34.4491	14.6246	25.3494	11.6997	12.9997	13.3247
973	16.5746	15.9246	29.5743	15.2746	34.7741	14.6246	25.6744	12.0247	12.6747	12.9997
974	16.5746	16.5746	29.5743	14.9496	34.7741	14.6246	25.3494	11.6997	12.9997	12.9997
975	16.5746	16.5746	29.5743	14.9496	34.7741	14.9496	25.3494	11.6997	12.6747	12.9997
976	16.5746	16.2496	29.8993	15.2746	34.7741	14.6246	25.3494	11.6997	12.9997	13.3247
977	16.5746	16.2496	29.2493	14.9496	34.7741	14.2996	25.3494	11.3747	12.6747	13.6497
978	16.5746	16.2496	29.5743	14.9496	34.7741	15.2746	25.6744	11.0497	12.3497	13.3247
979	16.5746	16.5746	29.5743	15.2746	34.7741	14.9496	25.3494	11.0497	12.6747	13.3247
980	16.5746	16.5746	29.2493	15.2746	35.0991	15.2746	25.6744	11.6997	12.6747	12.6747
981	16.5746	16.2496	29.5743	15.2746	34.7741	14.9496	25.3494	11.3747	12.3497	13.3247
982	16.5746	16.2496	29.2493	15.2746	34.7741	14.6246	25.6744	11.3747	12.6747	13.6497
983	16.5746	16.2496	29.5743	15.2746	34.7741	14.9496	25.6744	11.6997	12.6747	13.9747
984	16.5746	16.2496	29.8993	15.2746	34.7741	14.2996	25.6744	11.3747	12.3497	13.3247
985	16.5746	16.2496	28.9243	15.2746	35.0991	14.9496	25.3494	11.6997	12.3497	13.6497
986	16.5746	16.2496	29.5743	15.2746	35.0991	14.9496	25.6744	11.3747	12.6747	13.3247
987	16.5746	16.5746	29.5743	15.2746	35.0991	15.2746	25.3494	11.3747	12.6747	13.9747
988	16.5746	16.5746	29.5743	15.2746	35.0991	14.9496	25.6744	11.3747	12.6747	13.6497
989	16.2496	16.5746	29.2493	15.2746	35.0991	14.9496	25.6744	10.7247	12.3497	13.3247
990	16.5746	15.9246	29.8993	15.2746	34.7741	14.9496	25.3494	11.0497	12.6747	13.3247
991	15.9246	16.5746	29.5743	15.2746	34.7741	14.6246	25.3494	11.0497	12.3497	13.6497
992	16.5746	16.2496	29.5743	15.2746	34.7741	15.2746	25.6744	11.0497	12.6747	12.9997
993	16.5746	16.5746	29.8993	15.2746	35.0991	14.9496	25.6744	12.0247	12.3497	13.3247
994	16.5746	16.5746	29.2493	15.2746	35.0991	14.9496	25.6744	11.6997	12.3497	13.6497
995	16.2496	16.2496	29.5743	15.5996	34.7741	14.9496	25.6744	11.3747	12.6747	13.3247
996	16.2496	16.2496	29.2493	15.5996	35.0991	15.2746	25.6744	11.6997	12.3497	13.3247
997	16.2496	16.5746	29.5743	15.2746	34.7741	15.2746	25.3494	12.0247	12.6747	13.6497
998	16.2496	16.5746	29.8993	15.5996	34.7741	14.9496	25.6744	11.0497	12.9997	12.9997
999	16.2496	16.5746	29.8993	15.5996	34.7741	14.9496	25.0244	11.6997	12.6747	13.3247
1000	16.5746	16.5746	29.2493	15.2746	34.7741	15.2746	25.3494	12.0247	13.3247	13.6497
1001	16.5746	16.5746	29.5743	15.5996	35.0991	14.9496	25.3494	11.6997	13.6497	12.9997
1002	16.5746	16.5746	29.5743	15.9246	34.7741	15.2746	25.6744	11.6997	12.3497	13.3247
1003	16.5746	16.2496	28.9243	15.2746	35.0991	14.9496	25.6744	12.0247	12.3497	12.9997
1004	16.5746	16.5746	29.5743	15.2746	34.7741	14.6246	25.3494	12.6747	12.9997	13.6497
1005	16.2496	16.5746	29.5743	15.5996	34.4491	14.9496	25.0244	13.3247	12.3497	12.9997
1006	16.5746	16.5746	29.5743	15.2746	34.7741	14.9496	25.6744	12.9997	12.6747	13.3247
1007	16.5746	16.5746	29.5743	15.5996	35.0991	15.2746	25.6744	11.6997	12.3497	13.3247
1008	16.5746	16.2496	29.5743	15.5996	35.0991	14.9496	25.3494	12.3497	12.6747	13.9747
1009	16.5746	16.2496	29.2493	15.5996	34.4491	14.6246	25.3494	12.3497	12.6747	13.3247
1010	16.2496	16.2496	29.2493	15.5996	34.7741	14.9496	25.6744	12.0247	13.3247	12.9997
1011	16.5746	16.2496	29.5743	15.9246	35.0991	14.6246	25.6744	12.9997	12.6747	13.6497
1012	16.5746	16.2496	29.5743	15.5996	34.4491	14.9496	25.3494	12.0247	12.3497	13.6497
1013	16.2496	16.5746	29.5743	15.9246	35.0991	14.9496	25.6744	12.0247	12.3497	13.9747
1014	16.5746	16.2496	29.2493	15.9246	35.0991	14.9496	25.6744	12.6747	12.9997	13.9747
1015	16.5746	16.2496	29.5743	15.2746	35.0991	14.9496	25.6744	12.3497	12.6747	13.9747
1016	16.2496	16.2496	29.8993	15.5996	34.7741	14.6246	25.6744	12.3497	12.3497	13.6497
1017	16.2496	16.2496	29.5743	15.5996	34.7741	14.6246	25.6744	12.0247	12.3497	13.3247
1018	16.2496	16.2496	28.9243	15.2746	35.0991	14.9496	25.0244	12.6747	13.6497	13.9747
1019	16.5746	16.2496	29.5743	15.5996	34.7741	14.6246	25.3494	11.6997	12.9997	13.6497
1020	16.5746	16.2496	29.5743	15.5996	34.7741	14.6246	25.0244	12.3497	12.6747	13.6497
1021	16.2496	16.2496	29.5743	15.5996	34.7741	14.9496	25.3494	12.3497	12.9997	12.9997
1022	16.2496	16.2496	29.5743	15.5996	35.0991	14.6246	25.3494	12.0247	12.6747	13.3247
1023	16.5746	15.9246	29.2493	15.2746	34.7741	14.6246	25.0244	12.6747	12.9997	13.9747
1024	16.2496	15.9246	29.5743	14.9496	35.4241	14.6246	25.3494	12.0247	12.6747	13.6497
1025	16.2496	16.2496	29.2493	15.2746	34.7741	14.6246	25.6744	12.0247	13.6497	13.6497
1026	16.5746	15.9246	29.5743	15.2746	35.0991	14.6246	25.3494	12.3497	12.6747	13.6497
1027	16.5746	15.9246	29.5743	15.9246	34.4491	14.6246	25.0244	12.0247	12.9997	13.6497
1028	15.9246	16.2496	29.5743	15.9246	35.0991	14.6246	25.3494	12.6747	12.9997	13.6497
1029	16.5746	16.2496	29.5743	15.9246	35.0991	14.2996	25.3494	12.0247	12.9997	13.9747
1030	16.2496	16.5746	29.5743	15.9246	34.7741	14.6246	25.6744	12.3497	12.6747	13.9747
1031	16.2496	16.2496	29.5743	15.2746	35.0991	14.9496	25.0244	12.0247	12.6747	13.6497
1032	15.9246	16.5746	29.2493	15.5996	34.7741	14.6246	25.3494	11.6997	12.6747	14.2996
1033	16.5746	16.2496	29.2493	15.2746	35.0991	14.6246	25.0244	12.0247	12.3497	13.9747
1034	16.2496	16.5746	28.9243	15.5996	34.4491	14.9496	25.6744	12.3497	12.3497	13.3247
1035	16.5746	16.5746	28.9243	15.2746	34.7741	14.9496	25.3494	12.0247	13.3247	13.6497
1036	16.5746	16.2496	28.9243	15.2746	34.7741	14.6246	25.6744	12.3497	12.6747	13.3247
1037	16.5746	16.2496	29.2493	15.5996	34.7741	14.9496	25.6744	12.6747	12.6747	13.6497
1038	16.5746	16.2496	29.5743	15.2746	34.7741	14.9496	25.9994	12.6747	12.9997	13.6497
1039	16.2496	16.2496	29.2493	15.5996	35.0991	14.9496	25.6744	12.0247	12.0247	13.6497
1040	16.2496	16.5746	29.5743	15.2746	34.7741	14.6246	25.3494	12.6747	13.3247	13.9747
1041	16.2496	16.2496	29.2493	15.2746	35.0991	14.6246	25.6744	12.0247	12.6747	13.9747
1042	16.5746	16.2496	28.5993	15.5996	34.7741	14.6246	25.6744	12.0247	12.9997	13.6497
1043	16.2496	15.9246	29.5743	15.2746	34.7741	14.6246	25.3494	12.3497	12.6747	13.6497
1044	16.2496	16.2496	28.9243	14.6246	34.4491	14.6246	25.6744	12.6747	12.9997	13.9747
1045	16.5746	16.2496	29.5743	14.9496	34.7741	14.6246	25.6744	12.0247	13.3247	13.9747
1046	16.5746	15.9246	28.5993	14.9496	34.7741	14.9496	25.3494	11.3747	12.3497	13.9747
1047	16.5746	16.2496	28.9243	14.9496	35.0991	14.9496	25.6744	11.6997	12.9997	14.2996
1048	16.5746	16.5746	29.2493	14.9496	34.7741	14.6246	25.3494	12.0247	12.9997	14.2996
1049	16.5746	16.5746	29.2493	14.6246	34.7741	14.6246	25.3494	12.0247	12.6747	14.2996
1050	16.5746	16.2496	29.2493	14.9496	34.4491	14.6246	25.6744	12.3497	12.9997	14.2996
1051	16.5746	15.9246	29.2493	14.6246	34.7741	14.6246	25.6744	12.3497	12.9997	13.6497
1052	16.5746	15.9246	29.2493	14.6246	35.0991	14.6246	25.3494	12.3497	13.3247	13.9747
1053	16.5746	15.9246	29.2493	14.6246	34.7741	14.6246	25.6744	12.0247	13.3247	13.9747
1054	16.2496	15.9246	28.5993	14.6246	35.0991	15.2746	25.3494	12.0247	12.6747	13.9747
1055	16.5746	16.2496	29.2493	14.6246	34.7741	15.2746	25.3494	12.3497	12.6747	13.9747
1056	16.5746	15.9246	28.5993	14.6246	34.7741	14.6246	25.6744	12.0247	12.9997	14.2996
1057	16.5746	15.9246	29.5743	14.6246	34.7741	14.6246	25.3494	12.6747	12.9997	13.9747
1058	16.2496	16.5746	29.8993	14.6246	34.4491	14.9496	25.3494	12.0247	12.9997	14.2996
1059	16.5746	15.9246	29.2493	14.6246	34.7741	14.6246	25.3494	11.6997	12.6747	13.6497
1060	16.2496	16.5746	29.2493	14.6246	34.7741	14.9496	25.3494	12.3497	12.0247	13.9747
1061	16.5746	16.2496	29.2493	14.6246	34.7741	14.9496	25.3494	12.0247	12.6747	13.9747
1062	16.2496	16.2496	29.5743	14.6246	34.7741	14.9496	25.6744	12.3497	12.6747	13.9747
1063	16.2496	15.9246	29.2493	14.6246	34.4491	14.9496	25.6744	12.0247	12.6747	13.9747
1064	16.5746	15.9246	29.8993	14.6246	34.7741	14.9496	25.6744	12.0247	12.9997	13.9747
1065	16.5746	16.5746	28.9243	14.6246	34.7741	14.9496	25.0244	12.3497	12.9997	13.9747
1066	16.2496	16.2496	29.8993	14.6246	35.0991	14.9496	25.3494	12.0247	12.9997	13.9747
1067	16.5746	16.2496	29.5743	14.6246	34.7741	15.2746	25.6744	11.6997	12.9997	13.9747
1068	16.5746	16.5746	29.2493	14.6246	34.7741	14.9496	25.3494	11.6997	12.9997	13.9747
1069	16.5746	16.5746	28.9243	14.6246	35.0991	14.6246	25.6744	12.0247	12.9997	13.9747
1070	16.5746	15.9246	29.8993	14.6246	35.0991	15.2746	25.3494	12.0247	12.3497	13.9747
1071	16.2496	15.9246	29.8993	14.6246	34.7741	14.9496	25.6744	12.0247	12.9997	13.9747
1072	16.5746	15.9246	29.2493	14.6246	34.7741	15.2746	25.3494	12.3497	12.9997	14.2996
1073	16.2496	15.9246	28.5993	14.6246	34.7741	15.2746	25.6744	12.3497	13.3247	14.2996
1074	16.5746	16.2496	29.2493	14.6246	34.7741	14.9496	25.6744	12.3497	12.9997	13.9747
1075	16.5746	16.2496	28.9243	14.6246	34.7741	14.9496	25.6744	12.0247	12.9997	13.9747
1076	16.2496	16.2496	28.5993	14.6246	34.7741	14.9496	25.3494	12.3497	12.6747	14.2996
1077	16.5746	16.5746	29.2493	14.6246	34.7741	14.6246	25.6744	12.6747	12.3497	13.9747
1078	16.2496	16.2496	29.2493	14.6246	34.4491	14.6246	25.3494	12.3497	12.9997	13.9747
1079	16.2496	15.9246	29.2493	14.6246	34.7741	14.9496	25.6744	12.6747	12.9997	13.9747
1080	16.2496	15.9246	29.5743	14.6246	34.7741	14.9496	25.3494	12.6747	12.9997	13.9747
1081	16.5746	16.2496	28.9243	14.6246	34.7741	15.2746	25.3494	12.3497	12.9997	14.2996
[truncated: 749 more rows]

## Sheet: NS398
Stimulation
[truncated: 1,839 more rows]

## Sheet: ONO8130
Stimulation
[truncated: 1,833 more rows]

## Sheet: L798106
Stimulation
[truncated: 1,833 more rows]

## Sheet: AL8810
Stimulation
[truncated: 1,833 more rows]
