# Supplementary material for: Elevated pyramidal cell firing orchestrates arteriolar vasoconstriction through COX-2-derived prostaglandin E2 signaling
Source: eLife. 2025 Apr 23;13:RP102424. doi: 10.7554/eLife.102424 (PMC12017770; doi:10.7554/eLife.102424)
Supplement: Figure 5—source data 2. [file elife-102424-fig5-data2.xlsx]

## Sheet: DataToMean
Time	Data_110_20230315_Pial1_5ms-1mW-10Hz-10s_Ls5-6-10_Diam	Data_111_20230323_Pial1_5ms-1mW-10Hz-10s_Ls4-7-8_Diam	Data_115_20230223_Pial1_5ms-1mW-10Hz-10s_Ls9Ls10_Diam	Data_115_20230303_Pial2_5ms-1mW-10Hz-10s_Ls5-6_Diam	Data_116_20230301_Pial1_5ms-1mW-10Hz-10s_Ls6Ls7Ls20_Diam
1	-0.432968	-0.595908	-0.321706	-3.54025	1.31904
1.1	-0.400523	-0.503836	0.0636726	-4.54441	0.674396
1.2	-0.620423	-0.379276	-0.197727	-3.30839	0.418176
1.3	-0.682013	-0.487592	0.345912	-3.19951	16.8084
1.4	-0.403167	-0.166284	-0.253621	-2.40296	-0.711907
1.5	-0.25236	-0.112451	-0.584315	-2.13796	0.807584
1.6	0.175234	-0.054933	-0.181819	-3.57092	16.3444
1.7	0.379001	0.0467082	0.206025	-2.93593	17.2024
1.8	0.152731	0.149205	0.408023	-3.03057	1.46079
1.9	0.0683663	0.141208	-0.0578405	-2.8959	0.517621
2	0.410663	0.460337	-0.460889	-1.65202	0.0938994
2.1	0.115223	0.562834	-0.202964	-2.3925	-1.17234
2.2	0.160301	0.484582	-0.32966	-1.43552	-0.600482
2.3	0.0358834	0.44652	-0.32966	-1.85215	0.223247
2.4	0.0065406	0.559194	-0.181819	0.123715	0.90496
2.5	0.10268	0.66751	-0.27852	0.325871	0.854732
2.6	-0.177042	0.227709	-0.0498864	-1.54045	-0.752244
2.7	-0.373061	0.119393	0.113411	-1.67138	-0.0133682
2.8	-0.16091	0.0190753	0.0661381	-1.14764	-0.411039
2.9	-0.0341862	0.348381	-0.229767	0.212489	-0.683491
3	-0.108441	0.346202	-0.337614	0.0552492	-0.41077
3.1	-0.0313596	0.454438	-0.173865	-0.811997	-0.237976
3.2	-0.309381	0.552195	-0.305798	1.0879	-0.403899
3.3	-0.0186948	0.781645	-0.321706	2.85324	-0.33344
3.4	0.0464009	0.352021	-0.57251	3.10141	-0.562725
3.5	-0.0341862	0.188151	-0.461593	1.51091	-0.837497
3.6	0.0361607	0.468334	-0.459363	0.490026	-0.0812123
3.7	0.0464009	0.556383	-0.181819	0.82567	-0.164725
3.8	-0.00885658	0.756119	0.213979	1.95686	0.499051
3.9	-0.139682	0.787463	0.105909	1.49696	0.0131993
4	-0.300222	0.684966	-0.0339781	1.77271	-1.02495
4.1	-0.284875	0.357839	-0.173865	1.672	-1.12368
4.2	-0.328886	0.466155	-0.733413	1.42319	-0.289514
4.3	-0.367465	0.255342	0.36249	2.12757	-0.398979
4.4	-0.0772746	0.0423501	0.337958	2.46334	-0.967662
4.5	-0.435158	0.0423501	0.213979	2.46334	-0.605109
4.6	-0.370971	-0.0511225	0.213979	2.38956	-0.76587
4.7	-0.277719	0.040171	-0.0236357	3.11802	-0.207268
4.8	-0.0549551	0.0481688	-0.0657946	3.41311	-0.464916
4.9	-0.450734	0.371656	-0.103088	0.517493	-1.17322
5	-0.473503	0.147026	0.493753	0.244764	-1.17897
5.1	-0.0767788	0.0553665	0.493753	1.06216	-0.416438
5.2	-0.05326	0.460478	-0.0156816	1.98589	0.0484866
5.3	-0.38013	0.269159	-0.593526	1.83011	-0.314066
5.4	-0.308702	0.26698	-0.150929	1.53018	-0.614737
5.5	0.294264	0.363658	0.345912	1.41272	-0.805551
5.6	-0.218956	0.365837	0.485799	1.73489	-1.01534
5.7	-0.0295223	0.0423501	0.485799	1.10505	-1.23762
5.8	-0.165645	0.115719	0.345912	1.60395	-1.18761
5.9	-0.379451	-0.0681449	0.213979	2.1203	-1.32059
6	-0.156687	-0.0681449	0.493753	2.48812	-1.62401
6.1	0.205428	-0.17864	0.0900006	1.12076	-2.85332
6.2	0.131173	0.252847	0.221933	0.723375	-1.69553
6.3	0.196681	0.0481688	0.221933	3.27337	-0.690357
6.4	0.132531	0.0643171	0.0900006	3.74613	-1.16679
6.5	0.506631	-0.172821	0.0661381	0.875499	-0.800191
6.6	0.491832	-0.0623262	0.190117	2.40427	-1.65568
6.7	-0.0979234	0.156485	-0.32966	1.54837	-1.65845
6.8	-0.10075	0.156485	-0.897162	0.690951	-1.5195
6.9	-0.165846	0.0423501	0.501707	1.52332	-1.8729
7	-0.0979234	0.0481387	-0.173865	0.417819	-1.28988
7.1	-0.233768	0.258982	0.206025	-0.532053	-0.72457
7.2	-0.0845793	0.253163	0.337958	1.28492	-1.25744
7.3	0.0929071	0.040171	0.0979547	-0.724328	-2.59343
7.4	0.0459891	-0.268038	-0.0498864	-0.664452	-0.995607
7.5	-0.025816	-0.0681449	-0.197727	-0.948751	-0.607757
7.6	-0.025816	0.0169828	-0.0498864	-1.13103	-0.232456
7.7	-0.0310723	-0.381455	-0.189773	-2.51045	-0.208619
7.8	0.093864	-0.278958	0.0820464	-1.15498	-0.0261967
7.9	-0.0356542	-0.0681449	0.0820464	-0.553334	-0.166424
8	-0.116241	-0.170642	0.116251	-1.84586	-0.853522
8.1	0.339621	0.0503479	-0.0578405	-1.65477	-0.13468
8.2	0.261364	-0.162644	-0.286126	-0.952678	0.342342
8.3	-0.107082	-0.281137	-0.0578405	-1.58592	0.407401
8.4	-0.110588	-0.172821	0.625686	-1.65203	-0.144968
8.5	-0.0363335	-0.448605	0.520004	-1.7137	-0.102287
8.6	0.319448	-0.602445	0.477845	-1.14658	-0.884359
8.7	0.4131	-0.704942	-0.21967	-0.587607	-1.02632
8.8	0.251673	-0.704634	-0.453639	-2.57132	-1.07705
8.9	0.332792	-0.391632	-0.0498864	-1.17158	-0.936954
9	0.474969	-0.275318	-0.0657946	-0.278979	-1.11572
9.1	0.549224	-0.815437	0.344417	-0.598013	-0.969949
9.2	0.397007	-1.03048	0.184693	-0.278979	-1.29441
9.3	0.373373	-0.833958	0.198071	-1.13837	-1.00751
9.4	0.264687	-0.809618	0.74171	-0.728949	-0.521677
9.5	0.332792	-0.815437	0.617732	-0.5907	-0.339693
9.6	0.474969	-0.917934	-0.189773	-1.53117	-0.652312
9.7	0.400715	-0.917934	-0.60148	-0.581403	-0.790236
9.8	0.332792	-0.807439	-0.189773	-0.245059	-0.112256
9.9	0.769161	-1.02625	0.0820464	-0.52424	0.471105
10	-0.344141	-5.32565	-1.40898	-3.20156	-4.51091
10.1	-93.2919	-100	-100	-100	-100
10.2	-100	-100	-100	-100	-100
10.3	-100	-100	-100	-100	-100
10.4	-100	-100	-100	-100	-100
10.5	-100	-100	-100	-100	-100
10.6	-100	-100	-100	-100	-100
10.7	-100	-100	-100	-100	-100
10.8	-100	-100	-100	-100	-100
10.9	-100	-100	-100	-100	-100
11	-100	-100	-100	-100	-100
11.1	-100	-100	-100	-100	-100
11.2	-100	-100	-100	-100	-100
11.3	-100	-100	-100	-100	-100
11.4	-100	-100	-100	-100	-100
11.5	-100	-100	-100	-100	-100
11.6	-100	-100	-100	-100	-100
11.7	-100	-100	-100	-100	-100
11.8	-100	-100	-100	-100	-100
11.9	-100	-100	-100	-100	-100
12	-100	-100	-100	-100	-100
12.1	-100	-100	-100	-100	-100
12.2	-100	-100	-100	-100	-100
12.3	-100	-100	-100	-100	-100
12.4	-100	-100	-100	-100	-100
12.5	-100	-100	-100	-100	-100
12.6	-100	-100	-100	-100	-100
12.7	-100	-100	-100	-100	-100
12.8	-100	-100	-100	-100	-100
12.9	-100	-100	-100	-100	-100
13	-100	-100	-100	-100	-100
13.1	-100	-100	-100	-100	-100
13.2	-100	-100	-100	-100	-100
13.3	-100	-100	-100	-100	-100
13.4	-100	-100	-100	-100	-100
13.5	-100	-100	-100	-100	-100
13.6	-100	-100	-100	-100	-100
13.7	-100	-100	-100	-100	-100
13.8	-100	-100	-100	-100	-100
13.9	-100	-100	-100	-100	-100
14	-100	-100	-100	-100	-100
14.1	-100	-100	-100	-100	-100
14.2	-100	-100	-100	-100	-100
14.3	-100	-100	-100	-100	-100
14.4	-100	-100	-100	-100	-100
14.5	-100	-100	-100	-100	-100
14.6	-100	-100	-100	-100	-100
14.7	-100	-100	-100	-100	-100
14.8	-100	-100	-100	-100	-100
14.9	-100	-100	-100	-100	-100
15	-100	-100	-100	-100	-100
15.1	-100	-100	-100	-100	-100
15.2	-100	-100	-100	-100	-100
15.3	-100	-100	-100	-100	-100
15.4	-100	-100	-100	-100	-100
15.5	-100	-100	-100	-100	-100
15.6	-100	-100	-100	-100	-100
15.7	-100	-100	-100	-100	-100
15.8	-100	-100	-100	-100	-100
15.9	-100	-100	-100	-100	-100
16	-100	-100	-100	-100	-100
16.1	-100	-100	-100	-100	-100
16.2	-100	-100	-100	-100	-100
16.3	-100	-100	-100	-100	-100
16.4	-100	-100	-100	-100	-100
16.5	-100	-100	-100	-100	-100
16.6	-100	-100	-100	-100	-100
16.7	-100	-100	-100	-100	-100
16.8	-100	-100	-100	-100	-100
16.9	-100	-100	-100	-100	-100
17	-100	-100	-100	-100	-100
17.1	-100	-100	-100	-100	-100
17.2	-100	-100	-100	-100	-100
17.3	-100	-100	-100	-100	-100
17.4	-100	-100	-100	-100	-100
17.5	-100	-100	-100	-100	-100
17.6	-100	-100	-100	-100	-100
17.7	-100	-100	-100	-100	-100
17.8	-100	-100	-100	-100	-100
17.9	-100	-100	-100	-100	-100
18	-100	-100	-100	-100	-100
18.1	-100	-100	-100	-100	-100
18.2	-100	-100	-100	-100	-100
18.3	-100	-100	-100	-100	-100
18.4	-100	-100	-100	-100	-100
18.5	-100	-100	-100	-100	-100
18.6	-100	-100	-100	-100	-100
18.7	-100	-100	-100	-100	-100
18.8	-100	-100	-100	-100	-100
18.9	-100	-100	-100	-100	-100
19	-100	-100	-100	-100	-100
19.1	-100	-100	-100	-100	-100
19.2	-100	-100	-100	-100	-100
19.3	-100	-100	-100	-100	-64.7984
19.4	-100	-100	-100	-100	-63.9046
19.5	-100	-100	-100	-100	-63.5606
19.6	-100	-100	-100	-100	-63.0796
19.7	-100	-100	-100	-100	-63.0796
19.8	-100	-100	-100	-100	-63.1492
19.9	-100	-100	-100	-100	-62.9421
20	-100	-100	-100	-100	-63.3546
20.1	-100	-95.1102	-100	-100	-62.8045
20.2	24.7759	41.5829	19.5782	12.3664	-24.0538
20.3	25.5103	41.3624	23.5189	16.4221	15.0893
20.4	25.0091	40.9306	22.9832	17.7372	14.7923
20.5	24.4305	40.8259	23.139	17.477	14.9624
20.6	24.4213	40.392	23.4267	18.0432	14.0634
20.7	23.9786	39.8417	23.4426	16.7578	13.7484
20.8	23.4709	39.4077	23.015	15.3175	14.8476
20.9	22.8209	39.0465	22.3474	16.6268	14.8641
21	22.4163	38.435	22.3474	18.305	14.1042
21.1	21.8759	38.0032	22.0859	18.4314	14.8618
21.2	21.3128	37.3483	21.7958	16.9575	15.0869
21.3	20.7218	36.3785	21.9042	16.5125	14.876
21.4	19.8984	35.2097	21.9345	14.4083	15.0812
21.5	19.4207	34.6491	20.7324	15.2474	14.4275
21.6	18.7585	33.9018	20.0568	14.8011	14.1856
21.7	18.0329	32.8252	19.5432	16.0533	14.6327
21.8	17.4481	31.9696	19.2573	15.0058	14.7156
21.9	16.2966	31.0094	18.7375	13.7131	14.6882
22	15.8631	29.7358	17.7291	11.9757	14.5149
22.1	15.2061	29.2015	16.9905	12.0477	14.4181
22.2	14.624	27.9199	16.4787	10.1754	15.0287
22.3	13.7598	27.0438	16.3473	10.2643	14.6116
22.4	13.3011	26.1866	16.1568	10.1739	14.3863
22.5	12.8469	25.2462	14.8637	8.69965	13.8797
22.6	12.3099	24.2686	14.5919	5.70351	13.6793
22.7	11.3651	23.535	13.7844	4.40855	13.1623
22.8	10.594	22.7877	12.9769	2.582	13.07
22.9	10.2073	21.5003	12.589	2.86247	13.0216
23	9.70801	20.6425	11.9373	2.61777	13.3488
23.1	8.92256	19.5819	11.3937	0.363305	12.989
23.2	8.32962	18.8426	11.1219	0.904834	12.4202
23.3	6.98426	17.7682	10.5599	-2.56605	12.2447
23.4	6.26919	16.9206	10.61	-3.30437	12.714
23.5	5.26275	15.6331	9.83675	-4.17966	12.423
23.6	4.7032	14.7855	8.26935	-5.20801	11.9006
23.7	3.63167	14.3065	8.18753	-8.12592	12.3116
23.8	2.57066	13.1826	7.93162	-10.1734	12.483
23.9	1.64266	12.335	7.36969	-10.9018	11.8831
24	0.432461	11.3769	7.03991	-12.6619	11.8454
24.1	-0.127767	10.5497	6.37018	-13.3587	10.485
24.2	-1.11231	9.74538	5.94468	-16.0361	10.5135
24.3	-2.19171	8.92641	5.56479	-17.7992	11.113
24.4	-3.00718	7.71239	4.81277	-17.4758	10.8573
24.5	-3.74571	6.96824	4.37978	-18.6356	10.6157
24.6	-4.59662	5.94742	3.95768	-19.0828	10.6606
24.7	-5.58689	5.52361	4.10557	-18.2793	9.95236
24.8	-6.50587	5.09181	3.71773	-18.5398	9.33105
24.9	-7.37213	4.02539	3.04216	-19.3852	8.79898
25	-8.15795	3.27809	2.59624	-19.7209	8.56371
25.1	-9.07181	2.9626	1.81499	-20.6711	8.27725
25.2	-9.83863	2.12081	1.14737	-20.9265	7.81095
25.3	-10.7673	1.35942	1.31112	-20.0264	7.98802
25.4	-11.6274	0.531715	1.04662	-17.4687	7.49373
25.5	-12.6891	-0.22938	0.543387	-16.4788	7.37328
25.6	-13.1128	-1.07117	-0.295935	-14.8245	7.5613
25.7	-14.0517	-1.919	-0.963553	-13.4364	5.97582
25.8	-14.8338	-2.39531	-0.95613	-11.5541	5.67244
25.9	-15.5856	-3.2366	-1.88708	-12.7489	6.10874
26	-16.3692	-3.84517	-2.27493	-12.2929	5.67729
26.1	-17.2167	-4.47179	-2.40686	-11.686	5.36719
26.2	-17.9933	-5.4299	-3.06652	-14.1532	5.41373
26.3	-18.4117	-6.06087	-3.18255	-12.3305	5.376
26.4	-19.3942	-6.71149	-3.44641	-14.737	4.42895
26.5	-20.1882	-7.13529	-4.65767	-14.4921	4.29025
26.6	-20.7421	-8.19614	-4.6828	-13.6008	4.33178
26.7	-21.4543	-8.94901	-4.90563	-14.7777	3.93852
26.8	-22.5252	-9.47614	-5.82916	-16.1961	3.50721
26.9	-23.1152	-10.0096	-6.05086	-17.3049	3.43024
27	-23.8184	-10.9815	-7.01655	-17.6465	3.56452
27.1	-24.6122	-12.0354	-7.29633	-18.3514	3.15359
27.2	-25.283	-13.2394	-7.56019	-18.3826	3.23296
27.3	-25.7011	-13.8762	-7.97985	-16.4892	2.70084
27.4	-26.4139	-14.0768	-8.75554	-16.8789	2.99908
27.5	-27.0478	-14.822	-8.87952	-17.8809	2.70435
27.6	-27.8399	-16.0244	-9.95089	-19.0071	2.22568
27.7	-28.3228	-16.35	-9.25941	-16.5285	1.85138
27.8	-28.7456	-17.0675	-9.621	-20.554	2.00508
27.9	-29.5305	-17.9171	-11.2623	-20.2619	1.30852
28	-30.097	-18.7947	-10.9035	-19.1641	1.13138
28.1	-30.5922	-19.4293	-10.9666	-21.2423	0.978967
28.2	-30.9617	-19.9592	-11.2304	-20.571	1.85626
28.3	-31.2882	-20.7065	-11.2122	-20.9678	2.15175
28.4	-31.5578	-21.4596	-12.3098	-22.2691	1.82461
28.5	-32.4223	-22.1001	-12.6897	-19.8499	1.28917
28.6	-32.9918	-22.7427	-13.4813	-21.0296	1.03351
28.7	-33.3939	-23.4958	-14.6072	-19.1796	1.57849
28.8	-33.8423	-24.0726	-13.1173	-19.3488	0.88856
28.9	-34.2604	-24.6684	-13.645	-19.1625	0.763549
29	-34.5454	-25.2107	-14.1648	-20.0214	0.794257
29.1	-34.6998	-26.0619	-14.9723	-18.8097	0.581937
29.2	-34.8857	-26.2647	-15.9117	-21.1021	0.206016
29.3	-35.3157	-27.0157	-15.624	-20.3622	0.580661
29.4	-35.6842	-27.5536	-16.6795	-19.5383	0.358594
29.5	-36.0199	-28.3103	-17.0753	-20.6112	-0.248486
29.6	-36.4454	-29.0613	-16.5658	-21.2768	-0.0967714
29.7	-36.3746	-29.4851	-16.0198	-20.7696	-0.1064
29.8	-36.6463	-29.8042	-15.4523	-20.5617	-0.121838
29.9	-37.0763	-30.3422	-17.6316	-20.0048	-0.242395
30	-37.5778	-30.8942	-19.1416	-18.9981	-0.779936
30.1	-37.6921	-31.7415	-17.3873	-20.0763	-1.60495
30.2	-37.9923	-32.374	-17.967	-20.9969	-1.93109
30.3	-38.0335	-32.8036	-18.2388	-21.2736	-2.4352
30.4	-38.1184	-33.5625	-19.9539	-21.2049	-2.75795
30.5	-38.5617	-34.0946	-19.1755	-22.0518	-3.03067
30.6	-38.6974	-34.3499	-19.9619	-22.0672	-3.43777
30.7	-38.7753	-34.4152	-19.8323	-23.1731	-3.55502
30.8	-39.1424	-34.959	-19.814	-22.002	-3.38814
30.9	-39.2935	-35.8204	-19.2818	-23.0471	-3.67797
31	-38.9557	-36.029	-21.4131	-22.7651	-3.82825
31.1	-39.1772	-36.4608	-20.9935	-23.661	-3.85981
31.2	-39.6037	-37.0852	-20.9331	-23.41	-4.32641
31.3	-39.8265	-37.4262	-19.9421	-24.2113	-4.18432
31.4	-39.8979	-37.749	-20.7137	-24.5875	-5.09279
31.5	-39.6699	-38.0782	-21.7612	-25.5207	-4.49831
31.6	-39.9624	-38.6082	-21.3538	-26.7773	-4.33383
31.7	-39.8873	-39.1462	-21.6372	-27.0181	-4.96135
31.8	-40.1696	-39.3628	-21.5229	-27.1973	-5.17388
31.9	-40.1045	-39.7924	-21.3129	-28.1962	-4.91148
32	-39.8996	-40.1196	-22.2969	-29.684	-4.45155
32.1	-39.9163	-40.5434	-22.4447	-29.9319	-4.63077
32.2	-39.3628	-40.6495	-22.4447	-30.3059	-5.1295
32.3	-39.3676	-40.8661	-22.7006	-32.3131	-5.8486
32.4	-39.5209	-41.2831	-22.9566	-32.8623	-5.63776
32.5	-39.8649	-41.3893	-22.9406	-31.5777	-5.50025
32.6	-39.7764	-41.508	-22.7624	-32.1911	-6.04489
32.7	-39.4904	-41.9457	-22.5767	-32.6742	-6.05762
32.8	-39.6498	-42.3753	-22.8974	-31.2413	-6.0292
32.9	-39.9293	-42.8151	-22.8765	-32.1295	-6.13788
33	-39.8544	-42.9234	-22.8326	-33.3289	-5.88981
33.1	-39.8657	-43.0215	-22.8326	-32.772	-5.85823
33.2	-40.0079	-43.2302	-23.2021	-33.9014	-7.04554
33.3	-39.1228	-43.023	-22.6927	-34.0574	-6.0929
33.4	-38.9624	-43.1313	-23.1044	-33.3802	-5.81221
33.5	-39.0454	-43.4137	-24.6369	-33.967	-5.38806
33.6	-39.1967	-43.8881	-24.2838	-35.2358	-5.53096
33.7	-39.2908	-43.9964	-24.8458	-35.702	-5.22128
33.8	-39.5252	-44.0006	-25.1292	-35.9108	-4.71785
33.9	-39.1124	-43.9964	-24.8036	-35.6526	-3.8454
34	-39.1275	-44.3293	-24.8898	-35.8344	-4.35936
34.1	-39.1504	-44.6145	-23.8032	-36.5212	-4.47172
34.2	-39.0776	-44.6565	-24.0279	-37.1811	-4.56431
34.3	-39.1338	-44.554	-25.0754	-37.5686	-4.78983
34.4	-39.275	-44.7707	-25.1732	-37.2164	-4.48411
34.5	-39.1366	-44.9836	-25.2074	-37.3806	-5.09784
34.6	-38.8544	-44.977	-24.7792	-37.4363	-4.71419
34.7	-38.8459	-44.8789	-24.6796	-20.6517	-4.69495
34.8	-39.0008	-45.0851	-24.2759	-36.8376	-4.93729
34.9	-38.7928	-44.8869	-24.5135	-37.4211	-4.73804
35	-38.7928	-44.8796	-25.2074	-38.5258	-4.72851
35.1	-38.7199	-44.8847	-23.7482	-38.5996	-4.68358
35.2	-39.0099	-44.7764	-23.2795	-39.0104	-4.7637
35.3	-38.6374	-44.8905	-24.4158	-39.9421	-4.68074
35.4	-38.2537	-45.0852	-25.7234	-39.9255	-4.56431
35.5	-38.742	-45.3222	-26.0228	-41.1372	-4.60923
35.6	-38.6277	-44.7822	-25.8408	-42.2917	-4.51757
35.7	-38.4377	-44.9229	-25.2074	-41.6522	-4.89433
35.8	-38.3706	-45.2162	-26.5106	-20.9565	-4.56528
35.9	-38.5018	-45.222	-25.0595	-41.9966	-5.42281
36	-38.6059	-45.2565	-25.1994	-41.8294	-5.39512
36.1	-38.4221	-45.4328	-25.8933	-41.9343	-4.92733
36.2	-38.3337	-45.4328	-25.2971	-21.0302	-5.81149
36.3	-38.5345	-45.3258	-25.8201	-44.4449	-5.76613
36.4	-38.55	-45.4387	-25.991	-42.7084	-5.37706
36.5	-38.6156	-45.5412	-26.8065	-42.6803	-4.77555
36.6	-38.3432	-45.5492	-25.751	-20.4826	-4.33973
36.7	-38.3504	-45.5412	-24.7957	-43.7696	-4.65113
36.8	-38.4218	-45.4387	-25.1915	-43.9691	-3.57246
36.9	-38.5309	-45.3383	-25.7192	-22.8966	-4.17932
37	-38.6764	-45.017	-25.0436	-22.2865	-5.49479
37.1	-38.8854	-45.1174	-25.0595	-44.0632	-4.58221
37.2	-38.4536	-45.3303	-25.8591	-45.3032	-3.10405
37.3	-38.232	-45.1254	-25.5875	-45.4507	-3.71827
37.4	-38.5963	-45.017	-26.2127	-45.6382	-4.50703
37.5	-38.609	-45.1217	-25.3154	-46.4577	-3.91441
37.6	-38.5347	-45.1152	-25.5701	-47.1289	-2.85484
37.7	-38.4732	-45.1217	-26.3868	-46.367	-3.0987
37.8	-38.1209	-44.7946	-24.9276	-25.5763	-3.18109
37.9	-38.761	-44.6863	-25.5793	-26.9887	-3.24431
38	-39.1111	-44.6921	-25.1915	-46.9381	-3.28351
38.1	-38.4853	-44.373	-24.6717	-47.8574	-2.53982
38.2	-38.4151	-44.6964	-24.7745	-48.3074	-2.90353
38.3	-38.6819	-44.5727	-26.6666	-48.4383	-2.54766
38.4	-38.419	-44.3751	-26.6655	-47.3908	-3.01161
38.5	-38.4843	-44.1222	-25.8591	-46.2363	-3.0572
38.6	-38.9081	-44.4498	-26.5426	-46.6457	-3.10863
38.7	-38.7008	-44.3635	-26.8065	-48.8643	-2.74272
38.8	-38.502	-44.1425	-25.7693	-48.7326	-2.92353
38.9	-38.5649	-44.0422	-24.9355	-48.4955	-2.13819
39	-38.6871	-44.1014	-24.6637	-48.7938	-2.28316
39.1	-38.8528	-44.0342	-25.1994	-49.5183	-2.75113
39.2	-38.7522	-43.7303	-26.0686	-50.1163	-2.02097
39.3	-38.5829	-43.7202	-25.999	-48.7902	-1.86935
39.4	-38.8705	-43.5021	-26.2884	-50.0313	-1.72092
39.5	-38.598	-43.3916	-26.1229	-50.642	-1.32827
39.6	-38.497	-43.4146	-25.3075	-50.509	-2.07369
39.7	-38.6914	-43.2811	-25.4132	-49.1096	-1.93619
39.8	-38.4396	-43.3974	-25.5522	-49.8546	-1.5411
39.9	-38.7705	-43.3938	-25.4792	-51.1068	-2.13492
40	-38.504	-43.2753	-25.8829	-50.7607	-1.85874

## Sheet: Mean
Time	MeanOfMean	STD
1	-0.714359	1.75839
1.1	-0.94214	2.0668
1.2	-0.817529	1.44451
1.3	2.55704	8.07603
1.4	-0.787588	0.926564
1.5	-0.455901	1.07257
1.6	2.54239	7.86827
1.7	2.97965	8.06753
1.8	-0.171965	1.6869
1.9	-0.445308	1.3866
2	-0.229602	0.875696
2.1	-0.61795	1.17902
2.2	-0.344155	0.741328
2.3	-0.295232	0.915673
2.4	0.282518	0.441864
2.5	0.334454	0.450318
2.6	-0.458382	0.702489
2.7	-0.365002	0.757275
2.8	-0.326875	0.495587
2.9	-0.0773148	0.40551
3	-0.0910748	0.306558
3.1	-0.160152	0.454273
3.2	0.124204	0.664018
3.3	0.592208	1.34289
3.4	0.472918	1.52241
3.5	0.0731576	0.895424
3.6	0.0907892	0.399113
3.7	0.216382	0.45264
3.8	0.683431	0.768204
3.9	0.452769	0.68317
4	0.219706	1.06209
4.1	0.0894824	1.0317
4.2	0.107506	0.853646
4.3	0.395791	1.02885
4.4	0.359742	1.27272
4.5	0.33588	1.23562
4.6	0.283116	1.23307
4.7	0.529913	1.4526
4.8	0.575122	1.59854
4.9	-0.167579	0.681129
5	-0.153386	0.674881
5.1	0.223613	0.57104
5.2	0.485184	0.863747
5.3	0.162309	0.985576
5.4	0.144558	0.83729
5.5	0.322201	0.784877
5.6	0.270446	1.01153
5.7	0.0732094	0.860916
5.8	0.142466	1.00524
5.9	0.11322	1.26194
6	0.226604	1.48698
6.1	-0.323155	1.49646
6.2	-0.0732396	0.935635
6.3	0.609959	1.53473
6.4	0.573238	1.85618
6.5	0.0950512	0.642757
6.6	0.273643	1.45167
6.7	-0.0762371	1.14691
6.8	-0.333996	0.875796
6.9	0.0057275	1.23583
7	-0.219142	0.640386
7.1	-0.205077	0.436453
7.2	0.106804	0.916595
7.3	-0.617344	1.1581
7.4	-0.386399	0.436651
7.5	-0.369639	0.397095
7.6	-0.284441	0.482747
7.7	-0.664275	1.03948
7.8	-0.256844	0.523968
7.9	-0.148302	0.243184
8	-0.574003	0.797568
8.1	-0.291465	0.783084
8.2	-0.159549	0.518206
8.3	-0.324916	0.74952
8.4	-0.290943	0.830744
8.5	-0.356184	0.834544
8.6	-0.367219	0.727293
8.7	-0.425087	0.550218
8.8	-0.910996	1.04736
8.9	-0.443453	0.619245
9	-0.252168	0.572372
9.1	-0.297952	0.696375
9.2	-0.404432	0.73978
9.3	-0.481678	0.711514
9.4	-0.210769	0.681372
9.5	-0.159061	0.611371
9.6	-0.563245	0.756305
9.7	-0.498068	0.52132
9.8	-0.204347	0.406998
9.9	-0.0456355	0.731075
10	-2.95825	2.08016
10.1	-98.6584	2.99994
10.2	-100	0
10.3	-100	0
10.4	-100	0
10.5	-100	0
10.6	-100	0
10.7	-100	0
10.8	-100	0
10.9	-100	0
11	-100	0
11.1	-100	0
11.2	-100	0
11.3	-100	0
11.4	-100	0
11.5	-100	0
11.6	-100	0
11.7	-100	0
11.8	-100	0
11.9	-100	0
12	-100	0
12.1	-100	0
12.2	-100	0
12.3	-100	0
12.4	-100	0
12.5	-100	0
12.6	-100	0
12.7	-100	0
12.8	-100	0
12.9	-100	0
13	-100	0
13.1	-100	0
13.2	-100	0
13.3	-100	0
13.4	-100	0
13.5	-100	0
13.6	-100	0
13.7	-100	0
13.8	-100	0
13.9	-100	0
14	-100	0
14.1	-100	0
14.2	-100	0
14.3	-100	0
14.4	-100	0
14.5	-100	0
14.6	-100	0
14.7	-100	0
14.8	-100	0
14.9	-100	0
15	-100	0
15.1	-100	0
15.2	-100	0
15.3	-100	0
15.4	-100	0
15.5	-100	0
15.6	-100	0
15.7	-100	0
15.8	-100	0
15.9	-100	0
16	-100	0
16.1	-100	0
16.2	-100	0
16.3	-100	0
16.4	-100	0
16.5	-100	0
16.6	-100	0
16.7	-100	0
16.8	-100	0
16.9	-100	0
17	-100	0
17.1	-100	0
17.2	-100	0
17.3	-100	0
17.4	-100	0
17.5	-100	0
17.6	-100	0
17.7	-100	0
17.8	-100	0
17.9	-100	0
18	-100	0
18.1	-100	0
18.2	-100	0
18.3	-100	0
18.4	-100	0
18.5	-100	0
18.6	-100	0
18.7	-100	0
18.8	-100	0
18.9	-100	0
19	-100	0
19.1	-100	0
19.2	-100	0
19.3	-92.9597	15.7426
19.4	-92.7809	16.1424
19.5	-92.7121	16.2962
19.6	-92.6159	16.5113
19.7	-92.6159	16.5113
19.8	-92.6298	16.4802
19.9	-92.5884	16.5728
20	-92.6709	16.3883
20.1	-91.583	16.2264
20.2	14.8499	24.2652
20.3	24.3806	10.4889
20.4	24.2905	10.1524
20.5	24.167	10.1011
20.6	24.0693	10.0424
20.7	23.5538	10.0973
20.8	23.2117	9.93344
20.9	23.1411	9.54802
21	23.1216	9.22106
21.1	23.0517	8.86405
21.2	22.5003	8.77568
21.3	22.0786	8.5032
21.4	21.3064	8.39665
21.5	20.8954	8.14094
21.6	20.3408	7.98532
21.7	20.2175	7.29236
21.8	19.6793	7.11843
21.9	18.8889	7.03712
22	17.9637	6.90651
22.1	17.5728	6.73879
22.2	16.8453	6.62385
22.3	16.4053	6.34646
22.4	16.0409	6.07484
22.5	15.1073	6.13454
22.6	14.1106	6.66189
22.7	13.2511	6.85197
22.8	12.4021	7.217
22.9	12.0361	6.67734
23	11.6509	6.50357
23.1	10.6501	6.97501
23.2	10.3238	6.52486
23.3	8.9982	7.54451
23.4	8.64189	7.70284
23.5	7.79519	7.69461
23.6	6.89014	7.7539
23.7	6.06227	8.92679
23.8	5.19891	9.58489
23.9	4.46572	9.61128
24	3.60655	10.1831
24.1	2.78369	10.0192
24.2	1.81103	10.9868
24.3	1.12265	11.7203
24.4	0.579901	11.3279
24.5	-0.0835019	11.6374
24.6	-0.622739	11.705
24.7	-0.856931	11.2704
24.8	-1.38103	11.2175
24.9	-2.17817	11.2838
25	-2.68816	11.2933
25.1	-3.33761	11.5594
25.2	-3.93721	11.4459
25.3	-4.02703	11.217
25.4	-4.0048	10.2188
25.5	-4.29611	9.93721
25.6	-4.34862	9.42823
25.7	-4.87896	8.64996
25.8	-4.81339	8.31451
25.9	-5.4699	8.76358
26	-5.82098	8.68676
26.1	-6.08283	8.69726
26.2	-7.04585	9.27429
26.3	-6.92193	9.04478
26.4	-7.97202	9.38195
26.5	-8.43659	9.39035
26.6	-8.57801	9.42303
26.7	-9.22963	9.64883
26.8	-10.1039	9.94148
26.9	-10.6101	10.2406
27	-11.1797	10.4441
27.1	-11.8284	10.6186
27.2	-12.2464	10.8416
27.3	-12.2691	10.5274
27.4	-12.6252	10.8331
27.5	-13.1852	11.0444
27.6	-14.1193	11.1838
27.7	-13.7219	11.0726
27.8	-14.7966	11.64
27.9	-15.5327	11.4657
28	-15.5656	11.5657
28.1	-16.2503	11.8899
28.2	-16.1732	12.2665
28.3	-16.4046	12.5713
28.4	-17.1543	12.6078
28.5	-17.1545	12.4993
28.6	-17.8424	12.6392
28.7	-17.8196	12.8767
28.8	-17.8985	12.9445
28.9	-18.1946	13.0486
29	-18.6296	13.1888
29.1	-18.7924	13.1895
29.2	-19.5916	13.0978
29.3	-19.5474	13.4686
29.4	-19.8194	13.4963
29.5	-20.453	13.4511
29.6	-20.6892	13.7817
29.7	-20.5511	13.8633
29.8	-20.5173	14.0359
29.9	-21.0595	14.0439
30	-21.4783	14.0347
30.1	-21.7004	13.9788
30.2	-22.2522	13.9919
30.3	-22.5569	13.8717
30.4	-23.1195	13.8049
30.5	-23.3829	13.9537
30.6	-23.7028	13.8342
30.7	-23.9502	13.8096
30.8	-23.8611	14.1037
30.9	-24.2242	14.226
31	-24.5982	13.9794
31.1	-24.8305	14.1152
31.2	-25.0717	14.193
31.3	-25.1181	14.4366
31.4	-25.6082	14.1198
31.5	-25.9057	14.2586
31.6	-26.2071	14.5372
31.7	-26.53	14.3786
31.8	-26.6853	14.4239
31.9	-26.8635	14.6369
32	-27.2903	14.7974
32.1	-27.4934	14.822
32.2	-27.5785	14.5557
32.3	-28.2192	14.4213
32.4	-28.4521	14.6398
32.5	-28.2546	14.7
32.6	-28.4565	14.5528
32.7	-28.5489	14.6436
32.8	-28.4386	14.6685
32.9	-28.7777	14.8326
33	-28.9658	15.0211
33.1	-28.87	15.0199
33.2	-29.4774	14.6814
33.3	-28.9977	14.9098
33.4	-28.8781	14.9205
33.5	-29.2902	15.0787
33.6	-29.6271	15.2937
33.7	-29.8112	15.4524
33.8	-29.8567	15.6883
33.9	-29.4821	15.9735
34	-29.7081	15.8573
34.1	-29.7122	16.0431
34.2	-29.9015	16.0575
34.3	-30.2243	15.9066
34.4	-30.1839	16.0504
34.5	-30.3612	15.85
34.6	-30.1522	16.0041
34.7	-26.7502	15.8341
34.8	-30.0273	15.9392
34.9	-30.0705	15.9863
35	-30.4268	16.0633
35.1	-30.1272	16.2132
35.2	-30.168	16.2988
35.3	-30.5133	16.3257
35.4	-30.7104	16.2553
35.5	-31.1667	16.4995
35.6	-31.212	16.6083
35.7	-31.0229	16.4141
35.8	-27.1238	15.8203
35.9	-31.2406	16.3452
36	-31.2573	16.3348
36.1	-31.322	16.4947
36.2	-27.1811	15.456
36.3	-31.9783	16.5949
36.4	-31.613	16.4492
36.5	-31.6838	16.6496
36.6	-26.8931	16.0484
36.7	-31.4216	17.0324
36.8	-31.3187	17.4446
36.9	-27.3329	15.8742
37	-27.3037	15.403
37.1	-31.5416	17.0576
37.2	-31.61	17.8062
37.3	-31.6228	17.5521
37.4	-31.9943	17.2359
37.5	-31.8836	17.7362
37.6	-31.8408	18.2637
37.7	-31.8895	17.9389
37.8	-27.3201	15.9175
37.9	-27.8519	15.9205
38	-31.8433	18.0671
38.1	-31.5854	18.4889
38.2	-31.8194	18.486
38.3	-32.1814	18.4977
38.4	-31.9724	18.0278
38.5	-31.5518	17.7909
38.6	-31.931	17.9003
38.7	-32.2956	18.4708
38.8	-32.014	18.3981
38.9	-31.6353	18.7162
39	-31.7058	18.7728
39.1	-32.0712	18.7109
39.2	-32.1377	19.008
39.3	-31.7923	18.7501
39.4	-32.0826	19.0659
39.5	-32.0166	19.3399
39.6	-31.9603	19.0752
39.7	-31.6863	18.785
39.8	-31.757	19.0996
39.9	-32.1771	19.203
40	-32.0563	19.1526
