# Supplementary material for: Elevated pyramidal cell firing orchestrates arteriolar vasoconstriction through COX-2-derived prostaglandin E2 signaling
Source: eLife. 2025 Apr 23;13:RP102424. doi: 10.7554/eLife.102424 (PMC12017770; doi:10.7554/eLife.102424)
Supplement: Figure 5—source data 3. [file elife-102424-fig5-data3.xlsx]

## Sheet: DataToMean
Time	Data_110_20230315_Pial1_postIndo_5ms-1mW-10Hz-10s_Ls18-19-23_Diam	Data_111_20230323_Pial1_5ms-1mW-10Hz-10s_postIndo_Ls15-16-20-25_Diam	Data_115_20230303_Pial2_PostIndo_5ms-5mW-10Hz-10s_Ls22-23-25-27-29-32_Diam	Data_116_20230301_PialP1-1_5ms-2mW-10Hz-10s_postIndo_Ls26to30_Diam
1	-0.298609	-1.43354	2.5105	0.0327484
1.1	0.521966	-1.34808	-1.04669	-0.0465184
1.2	0.190844	-1.12173	-0.520397	0.155222
1.3	-0.301559	-1.28496	-1.27925	0.353912
1.4	-0.349218	-1.27606	-1.1219	-0.0383036
1.5	-0.213682	-1.11695	-0.196208	-0.100048
1.6	-0.0480487	-0.959923	-0.450761	-0.660535
1.7	0.121409	-1.03612	-1.05017	-0.178024
1.8	-0.275673	-1.11934	-0.423243	-0.16075
1.9	-0.136973	-1.19711	-0.447699	0.161812
2	-0.792085	-1.01486	0.0432685	0.0528455
2.1	-0.465137	-0.881333	0.0704348	0.16238
2.2	0.110235	-0.800505	1.90615	0.592273
2.3	-0.461868	-0.882906	-0.414218	0.0248632
2.4	-0.379314	-0.724309	-0.803027	-0.200647
2.5	-0.235909	-0.805137	1.49005	-0.289003
2.6	-0.38569	-0.486302	0.504643	-0.634203
2.7	-0.388083	-0.480097	-0.424037	-0.300054
2.8	-0.470637	-0.639895	1.45321	0.297544
2.9	-0.351617	-0.562498	-0.1925	-0.0560077
3	-0.387559	-0.478524	-0.742394	-0.485713
3.1	0.331861	-0.393883	-0.919692	-0.887634
3.2	0.0300113	-0.561079	-0.109014	0.133836
3.3	-0.0715794	-0.799086	-0.649796	0.35465
3.4	-0.467714	-0.799086	-0.854833	0.49027
3.5	0.354906	-0.561899	0.757284	-0.365364
3.6	0.105367	-0.558087	-0.0455216	-0.198158
3.7	-0.139896	-0.656614	-1.31136	-0.191792
3.8	0.0246889	-0.401575	-0.426476	-0.230785
3.9	-0.382237	-0.473293	-1.11508	0.0439351
4	0.487666	-0.549489	-0.644751	0.182623
4.1	0.690446	-0.61948	-0.0953897	0.291851
4.2	0.440383	-0.464695	0.0897722	1.28472
4.3	-0.135621	-0.467088	0.0587535	0.728568
4.4	-0.279561	-0.302285	0.289869	1.11153
4.5	-0.302082	-0.383267	0.872295	0.762098
4.6	0.411493	-0.217645	0.401722	0.489568
4.7	0.6846	-0.298473	0.437945	0.63043
4.8	0.846699	-0.298473	0.705322	-0.00911733
4.9	0.762355	-0.168071	2.25486	-0.311399
5	0.627094	-0.300046	2.00747	0.19093
5.1	0.139965	-0.512258	-1.52539	-0.149314
5.2	0.092081	-0.453258	-1.04119	-0.231064
5.3	0.0136449	-0.222277	-0.127189	0.420749
5.4	1.08913	-0.228482	2.77176	0.848488
5.5	0.26306	-0.300046	-1.06221	0.679235
5.6	-0.012903	-0.213012	-0.508097	0.803062
5.7	-0.143343	-0.374669	0.349887	1.21721
5.8	-0.222974	-0.293841	-0.557603	0.804573
5.9	-0.307928	-0.139876	-1.07352	0.254452
6	0.192197	-0.253744	2.34228	-0.355349
6.1	-0.340658	0.101943	1.5484	0.0765961
6.2	-0.252283	-0.00891444	-1.44972	-0.581358
6.3	0.0129972	0.0225339	5.95854	-0.374754
6.4	0.761327	0.0202947	-0.512213	-0.324423
6.5	-0.0596712	-0.0574743	-1.71029	0.823119
6.6	0.232995	0.0988839	-1.07212	0.759773
6.7	0.519491	-0.142115	-1.96489	-0.34356
6.8	0.620277	0.0981313	-1.66277	-0.57832
6.9	0.843862	0.335851	2.65376	-0.613618
7	0.596723	0.573325	1.22608	-1.05875
7.1	-0.130948	0.571086	1.07842	-0.0977571
7.2	0.229197	0.491077	-1.41109	0.0668836
7.3	0.170664	0.571086	0.455701	-0.0186805
7.4	0.705245	0.810665	-1.67648	-0.563713
7.5	0.513137	0.654461	-1.79623	-0.996585
7.6	0.512293	0.59964	-1.01406	0.286673
7.7	0.532938	0.807007	1.09284	0.882703
7.8	-0.228296	0.887836	-1.4715	0.35166
7.9	-0.530332	0.887836	0.841538	-0.673763
8	-0.324389	1.04725	-1.66251	-0.186238
8.1	0.0774725	0.8094	-0.880737	-0.219489
8.2	0.115795	0.971057	-1.1356	0.130405
8.3	-0.0950013	1.04501	-1.3409	-0.418873
8.4	-0.224179	1.03418	-0.0816868	-0.10997
8.5	-0.233712	1.1912	-0.832383	-0.226141
8.6	0.220773	1.03178	-1.01344	0.0620201
8.7	-0.381142	1.19501	-0.159028	0.422697
8.8	-0.399774	1.27741	0.188268	0.352029
8.9	-0.231743	1.11642	1.99483	-0.199094
9	-0.316173	1.35585	2.99211	0.191129
9.1	-0.48524	1.26617	1.31083	-0.776393
9.2	-0.175156	1.35585	1.62965	-0.603414
9.3	-0.322019	1.35742	-0.185403	-0.799615
9.4	-0.404573	1.16767	0.956398	-0.395097
9.5	-0.325752	1.11418	-0.099228	0.361726
9.6	-0.15691	1.11642	-0.602927	0.0965166
9.7	-0.0642346	1.1233	1.19259	-0.495151
9.8	-0.643467	1.21851	0.675768	-0.814246
9.9	-0.76274	1.36445	0.312105	-0.838767
10	-1.81058	-1.26373	-4.86818	-4.61513
10.1	-98.7583	-100	-100	-100
10.2	-100	-100	-100	-100
10.3	-100	-100	-100	-100
10.4	-100	-100	-100	-100
10.5	-100	-100	-100	-100
10.6	-100	-100	-100	-100
10.7	-100	-100	-100	-100
10.8	-100	-100	-100	-100
10.9	-100	-100	-100	-100
11	-100	-100	-100	-100
11.1	-100	-100	-100	-100
11.2	-100	-100	-100	-100
11.3	-100	-100	-100	-100
11.4	-100	-100	-100	-100
11.5	-100	-100	-100	-100
11.6	-100	-100	-100	-100
11.7	-100	-100	-100	-100
11.8	-100	-100	-100	-100
11.9	-100	-100	-100	-100
12	-100	-100	-100	-100
12.1	-100	-100	-100	-100
12.2	-100	-100	-100	-100
12.3	-100	-100	-100	-100
12.4	-100	-100	-100	-100
12.5	-100	-100	-100	-100
12.6	-100	-100	-100	-100
12.7	-100	-100	-100	-100
12.8	-100	-100	-100	-100
12.9	-100	-100	-100	-100
13	-100	-100	-100	-100
13.1	-100	-100	-100	-100
13.2	-100	-100	-100	-100
13.3	-100	-100	-100	-100
13.4	-100	-100	-100	-100
13.5	-100	-100	-100	-100
13.6	-100	-100	-100	-100
13.7	-100	-100	-100	-100
13.8	-100	-100	-100	-100
13.9	-100	-100	-100	-100
14	-100	-100	-100	-100
14.1	-100	-100	-100	-100
14.2	-100	-100	-100	-100
14.3	-100	-100	-100	-100
14.4	-100	-100	-100	-100
14.5	-100	-100	-100	-100
14.6	-100	-100	-100	-100
14.7	-100	-100	-100	-100
14.8	-100	-100	-100	-100
14.9	-100	-100	-100	-100
15	-100	-100	-100	-100
15.1	-100	-100	-100	-100
15.2	-100	-100	-100	-100
15.3	-100	-100	-100	-100
15.4	-100	-100	-100	-100
15.5	-100	-100	-100	-100
15.6	-100	-100	-100	-100
15.7	-100	-100	-100	-100
15.8	-100	-100	-100	-100
15.9	-100	-100	-100	-100
16	-100	-100	-100	-100
16.1	-100	-100	-100	-100
16.2	-100	-100	-100	-100
16.3	-100	-100	-100	-100
16.4	-100	-100	-100	-100
16.5	-100	-100	-100	-100
16.6	-100	-100	-100	-100
16.7	-100	-100	-100	-100
16.8	-100	-100	-100	-100
16.9	-100	-100	-100	-100
17	-100	-100	-100	-100
17.1	-100	-100	-100	-100
17.2	-100	-100	-100	-100
17.3	-100	-100	-100	-100
17.4	-100	-100	-100	-100
17.5	-100	-100	-100	-100
17.6	-100	-100	-100	-100
17.7	-100	-100	-100	-100
17.8	-100	-100	-100	-100
17.9	-100	-100	-100	-100
18	-100	-100	-100	-100
18.1	-100	-100	-100	-100
18.2	-100	-100	-100	-100
18.3	-100	-100	-100	-100
18.4	-100	-100	-100	-100
18.5	-100	-100	-100	-100
18.6	-100	-100	-100	-100
18.7	-100	-100	-100	-100
18.8	-100	-100	-100	-100
18.9	-100	-100	-100	-100
19	-100	-100	-100	-100
19.1	-100	-100	-100	-100
19.2	-100	-100	-100	-100
19.3	-100	-100	-100	-100
19.4	-100	-100	-100	-100
19.5	-100	-100	-100	-100
19.6	-100	-100	-100	-100
19.7	-100	-100	-100	-100
19.8	-100	-100	-100	-100
19.9	-100	-100	-100	-100
20	-100	-100	-100	-100
20.1	-100	-93.7598	-100	-100
20.2	47.0389	33.6771	-10.1783	48.7292
20.3	49.8711	34.0713	22.315	52.2877
20.4	49.8121	34.0591	24.4403	52.6171
20.5	49.3507	33.9816	22.7455	52.3141
20.6	49.3048	34.0616	23.8917	52.0292
20.7	48.9756	34.4628	22.003	52.0053
20.8	48.9065	34.151	22.5925	52.2717
20.9	48.7903	34.2082	23.5076	52.4809
21	48.6516	34.241	22.396	52.0188
21.1	48.5713	34.2686	22.1401	51.6217
21.2	48.4438	34.3806	24.4444	51.718
21.3	48.2856	34.3844	23.5901	51.5493
21.4	47.6931	34.4804	24.3693	51.2365
21.5	47.0702	34.4668	25.1703	51.4721
21.6	46.9464	34.1489	24.7356	51.8212
21.7	46.1962	33.994	26.4436	51.1273
21.8	46.2763	34.1449	25.4985	50.9793
21.9	46.186	34.0798	26.5396	51.2773
22	45.792	34.1115	25.3155	51.4754
22.1	44.944	33.9841	27.4641	51.7623
22.2	44.5988	33.6661	25.2449	51.6568
22.3	44.6812	33.5853	25.3835	51.4607
22.4	44.263	33.4305	24.8563	51.286
22.5	43.0082	33.2717	24.7861	51.3139
22.6	42.6588	33.0367	25.8636	51.8948
22.7	42.4327	32.8003	26.0229	51.9194
22.8	42.0934	32.5561	27.906	51.8248
22.9	41.1906	32.314	26.5507	51.5715
23	40.5285	32.0787	26.0524	51.6271
23.1	40.1928	31.7653	27.2018	52.1924
23.2	39.8583	31.7478	27.4465	51.9272
23.3	39.1859	31.22	27.2328	51.707
23.4	38.4434	31.0544	25.8091	52.0511
23.5	37.9542	31.0482	25.8269	52.4093
23.6	36.9696	30.6431	24.5042	52.2532
23.7	36.6767	30.3289	23.6238	52.0065
23.8	36.3705	30.3289	26.6875	51.873
23.9	35.6374	29.9152	25.4488	51.8895
24	33.7441	29.6193	24.4522	52.4529
24.1	32.8334	29.6967	25.9196	51.6768
24.2	32.0363	29.3763	26.7721	51.9299
24.3	31.5143	29.1298	24.5408	52.152
24.4	30.9447	28.9877	25.6925	51.3612
24.5	30.5488	28.9765	25.6648	51.236
24.6	28.9665	28.6538	26.2404	51.7246
24.7	27.823	28.5129	24.5826	52.2279
24.8	27.2485	28.3669	23.6765	51.3432
24.9	26.5915	28.3401	24.6771	51.821
25	25.4445	28.3316	26.0798	52.0895
25.1	25.1183	28.0196	25.0111	51.412
25.2	24.1321	27.6466	24.3083	51.2351
25.3	23.0895	27.2318	24.4859	51.4395
25.4	21.968	27.2438	23.3267	51.738
25.5	21.3484	26.9766	24.157	51.3599
25.6	20.942	26.6627	23.9867	50.974
25.7	19.6462	26.3396	23.6183	51.1728
25.8	18.864	26.1	22.5507	51.1673
25.9	18.2724	25.9475	24.1692	50.8384
26	17.5109	25.6978	22.1708	50.8025
26.1	16.6874	25.3774	22.5391	50.9235
26.2	15.7944	25.0801	23.7004	50.621
26.3	15.0636	24.815	22.078	50.4936
26.4	14.0692	24.3374	21.6974	50.4048
26.5	13.4843	24.0642	23.9759	50.2969
26.6	12.695	23.6149	22.3374	49.9569
26.7	11.7083	23.2183	22.7267	50.1034
26.8	10.9722	22.8193	22.0651	50.3754
26.9	10.0026	22.4013	22.3078	50.1123
27	9.28609	21.8565	21.5114	50.3965
27.1	8.54553	21.5369	23.1533	50.4273
27.2	8.04886	21.2142	21.5386	50.2322
27.3	7.04909	20.7373	21.1377	49.9058
27.4	5.96474	20.2499	21.7552	49.6716
27.5	5.51117	19.6396	21.0304	49.8428
27.6	4.77988	19.2178	19.5079	49.8976
27.7	3.79904	18.6439	19.7425	49.8664
27.8	3.24229	18.0078	19.6578	49.6425
27.9	2.7439	17.7045	20.3027	49.4816
28	2.09515	17.283	20.7457	49.6016
28.1	1.68343	16.4906	19.6625	49.2577
28.2	0.957922	16.09	20.7024	49.0676
28.3	0.608704	15.9275	21.9574	49.0165
28.4	-0.0218119	14.8848	21.025	48.7699
28.5	-0.956517	14.3248	18.1903	48.1671
28.6	-1.56884	14.1622	19.2531	48.3666
28.7	-2.22866	13.4437	19.5148	48.0954
28.8	-2.46914	12.7206	18.772	47.9002
28.9	-2.70257	12.0068	18.2013	47.7655
29	-3.35131	11.3699	18.6686	47.5213
29.1	-4.00245	10.8169	18.3069	47.2723
29.2	-4.17348	10.0983	18.4503	47.7432
29.3	-4.23842	9.66695	19.213	47.5226
29.4	-4.88263	8.5851	18.5916	46.9482
29.5	-5.71114	8.26155	18.977	46.6422
29.6	-6.12046	7.62552	18.108	46.0366
29.7	-6.35351	6.91396	20.3024	46.639
29.8	-6.51517	6.52041	18.5067	46.5076
29.9	-6.75991	5.8766	19.3804	45.9831
30	-7.3333	5.32364	18.5078	45.9729
30.1	-7.76721	4.52505	20.4105	45.1684
30.2	-8.75974	3.97672	19.4093	45.7635
30.3	-8.95276	3.26068	19.7571	45.571
30.4	-9.09085	2.70391	18.5211	45.6107
30.5	-9.10857	2.07093	18.7989	45.4074
30.6	-8.93762	1.35392	18.8906	44.984
30.7	-9.42897	0.556149	18.7761	44.7035
30.8	-9.57373	-0.314008	18.11	44.9337
30.9	-9.82129	-0.866971	19.3212	44.8216
31	-10.2335	-1.34897	18.3098	44.5506
31.1	-10.4984	-2.14327	19.1322	44.2868
31.2	-10.6341	-2.6173	17.8987	43.5718
31.3	-10.899	-3.17831	18.1056	43.7154
31.4	-11.6985	-3.96722	18.8284	44.022
31.5	-11.7925	-4.67415	18.1592	43.4119
31.6	-12.0232	-5.54497	17.678	42.9426
31.7	-12.0203	-5.98275	17.8897	43.2477
31.8	-12.1859	-6.57769	17.5727	42.7558
31.9	-12.2578	-7.16413	17.9436	42.1805
32	-12.3399	-7.69266	17.346	41.6748
32.1	-12.9244	-8.47543	16.6572	40.9608
32.2	-12.8046	-8.95479	17.2622	41.1553
32.3	-13.0323	-9.5986	16.8662	40.9907
32.4	-13.0932	-10.0699	17.1081	41.0215
32.5	-13.0813	-10.692	18.0437	40.818
32.6	-13.1686	-11.5453	17.6045	40.7312
32.7	-13.3255	-11.8449	16.3005	40.1916
32.8	-13.5204	-12.5755	16.3751	40.1189
32.9	-13.1127	-12.9128	16.6201	40.0024
33	-13.3308	-13.3925	15.6398	39.5067
33.1	-13.9766	-13.946	14.9164	39.5864
33.2	-14.1417	-14.5054	14.3053	39.1782
33.3	-13.9766	-15.2826	16.2571	38.1128
33.4	-13.7646	-15.6062	14.5477	38.0457
33.5	-13.9615	-15.9798	15.4433	37.653
33.6	-14.3793	-16.6287	14.1477	37.1014
33.7	-14.3015	-17.0243	13.8427	37.448
33.8	-14.3076	-17.6642	13.4024	37.3302
33.9	-13.9713	-18.0515	14.3166	37.0409
34	-13.9742	-18.4365	14.8581	36.8503
34.1	-14.2237	-19.2348	14.0298	36.2504
34.2	-14.5553	-19.5617	12.9836	36.2017
34.3	-14.5505	-19.9761	13.491	36.0852
34.4	-14.3918	-20.4036	13.1089	36.1313
34.5	-14.3074	-20.7169	13.6831	36.0157
34.6	-14.219	-21.3277	15.4643	35.8894
34.7	-14.0621	-21.7632	15.1819	35.9824
34.8	-13.9766	-22.4498	12.3583	35.3912
34.9	-14.0928	-22.7592	12.8363	35.224
35	-14.1978	-23.0703	12.1889	35.1884
35.1	-14.3865	-23.6993	12.379	34.6591
35.2	-14.6902	-23.7754	11.4229	34.0093
35.3	-14.3918	-24.3236	10.6189	34.098
35.4	-14.2711	-24.7069	11.3657	34.1189
35.5	-14.6283	-25.2511	20.1407	33.8675
35.6	-14.6259	-25.9382	18.7908	33.3545
35.7	-14.3894	-26.198	16.8925	32.9499
35.8	-14.3841	-26.5152	17.1424	32.0955
35.9	-14.8736	-26.8246	14.8841	32.2263
36	-14.8368	-27.3697	15.0254	31.9444
36.1	-14.1417	-27.9288	16.5367	32.0253
36.2	-14.4704	-27.9115	16.7368	31.3398
36.3	-14.3092	-28.6827	17.7157	31.7203
36.4	-14.3063	-28.8389	17.151	31.5056
36.5	-14.6365	-29.1064	11.2422	31.4141
36.6	-14.9896	-29.4662	7.4063	31.5623
36.7	-15.2163	-29.4639	12.8554	31.1957
36.8	-15.9593	-29.9312	15.2578	31.5416
36.9	-14.9697	-30.1682	13.732	31.7439
37	-14.8871	-30.4839	13.3385	31.3521
37.1	-16.0296	-30.6316	12.4355	30.5402
37.2	-15.2293	-30.63	11.6117	30.3178
37.3	-15.3891	-31.0163	10.0502	30.4023
37.4	-15.3124	-31.0971	9.50887	29.8504
37.5	-14.9803	-31.101	6.19767	30.5182
37.6	-15.0546	-31.569	3.79736	30.0178
37.7	-15.7295	-31.9783	9.31998	29.8256
37.8	-16.5557	-31.7174	9.63997	29.8022
37.9	-16.3019	-31.9506	7.86143	29.8427
38	-16.7129	-32.1107	5.32612	28.9878
38.1	-17.0833	-32.1662	3.04994	28.588
38.2	-16.7825	-32.1821	7.07177	28.4202
38.3	-16.5757	-32.2543	8.65086	29.0903
38.4	-16.4784	-32.2857	9.11281	28.8893
38.5	-16.6376	-32.4944	7.91515	28.3537
38.6	-16.8641	-32.4874	-0.400767	28.0989
38.7	-17.0498	-32.5705	-0.563279	27.8266
38.8	-16.3806	-32.5681	0.289784	27.9324
38.9	-16.7905	-32.6548	0.185786	28.4096
39	-16.381	-32.7997	-0.494295	28.4153
39.1	-17.2096	-33.1112	0.258784	27.5613
39.2	-17.0367	-33.1138	-2.69688	27.4786
39.3	-16.8866	-33.0353	-3.58591	27.982
39.4	-17.4645	-33.1835	-3.95043	28.0035
39.5	-17.2982	-33.193	-5.17214	28.217
39.6	-17.298	-33.2716	-8.74722	28.1226
39.7	-17.3181	-33.3501	-4.97412	26.8789
39.8	-17.4645	-33.2661	-5.38773	27.3959
39.9	-17.3795	-33.1899	-9.25704	27.4117
40	-17.3771	-33.1319	-31.1313	27.4854
39.2
39.3
39.4
39.5
39.6
39.7
39.8
39.9
40
41
41.1
41.2
41.3
41.4
41.5
41.6
41.7
41.8
41.9
42
42.1
42.2
42.3
42.4
42.5
42.6
42.7
42.8
42.9
43
43.1
43.2
43.3
43.4
43.5
43.6
43.7
43.8
43.9
44
44.1
44.2
44.3
44.4
44.5
44.6
44.7
44.8
44.9
45
45.1
45.2
45.3
45.4
45.5
45.6
45.7
45.8
45.9
46
46.1
46.2
46.3
46.4
46.5
46.6
46.7
46.8
46.9
47
47.1
47.2
47.3
47.4
47.5
47.6
47.7
47.8
47.9
48
48.1
48.2
48.3
48.4
48.5
48.6
48.7
48.8
48.9
49
49.1
49.2
49.3
49.4
49.5
49.6
49.7
49.8
49.9
50
50.1
50.2
50.3
50.4
50.5
50.6
50.7
50.8
50.9
51
51.1
51.2
51.3
51.4
51.5
51.6
51.7
51.8
51.9
52
52.1
52.2
52.3
52.4
52.5
52.6
52.7
52.8
52.9
53
53.1
53.2
53.3
53.4
53.5
53.6
53.7
53.8
53.9
54
54.1
54.2
54.3
54.4
54.5
54.6
54.7
54.8
54.9
55
55.1
55.2
55.3
55.4
55.5
55.6
55.7
55.8
55.9
56
56.1
56.2
56.3
56.4
56.5
56.6
56.7
56.8
56.9
57
57.1
57.2
57.3
57.4
57.5
57.6
57.7
57.8
57.9
58
58.1
58.2
58.3
58.4
58.5
58.6
58.7
58.8
58.9
59

## Sheet: Mean
Time	MeanOfMean	STD
1	0.202775	1.66167
1.1	-0.479832	0.869205
1.2	-0.324016	0.624411
1.3	-0.627965	0.801341
1.4	-0.696371	0.597406
1.5	-0.406721	0.476112
1.6	-0.529817	0.383157
1.7	-0.535727	0.598561
1.8	-0.494752	0.43003
1.9	-0.404992	0.583773
2	-0.427707	0.556855
2.1	-0.278414	0.48798
2.2	0.452039	1.12839
2.3	-0.433532	0.371142
2.4	-0.526824	0.284862
2.5	0.0400008	1.00021
2.6	-0.250388	0.513598
2.7	-0.398067	0.0755196
2.8	0.160056	0.953738
2.9	-0.290656	0.217799
3	-0.523547	0.152584
3.1	-0.467337	0.584633
3.2	-0.126561	0.306287
3.3	-0.291453	0.532883
3.4	-0.407841	0.622646
3.5	0.0462316	0.616471
3.6	-0.1741	0.284405
3.7	-0.574916	0.543154
3.8	-0.258537	0.207886
3.9	-0.481669	0.478689
4	-0.130988	0.553829
4.1	0.0668567	0.558828
4.2	0.337545	0.733187
4.3	0.0461532	0.504085
4.4	0.204888	0.66361
4.5	0.237261	0.671979
4.6	0.271285	0.328315
4.7	0.363625	0.453912
4.8	0.311108	0.552689
4.9	0.634437	1.1805
5	0.631362	0.992504
5.1	-0.51175	0.726536
5.2	-0.408357	0.477619
5.3	0.0212318	0.283429
5.4	1.12022	1.24116
5.5	-0.104991	0.753832
5.6	0.0172626	0.561967
5.7	0.26227	0.704697
5.8	-0.0674611	0.59892
5.9	-0.316717	0.556876
6	0.481345	1.26321
6.1	0.34657	0.82652
6.2	-0.573069	0.629752
6.3	1.40483	3.04145
6.4	-0.0137535	0.561809
6.5	-0.25108	1.05788
6.6	0.00488303	0.772586
6.7	-0.482768	1.05461
6.8	-0.380671	0.985563
6.9	0.804965	1.37259
7	0.334345	0.976706
7.1	0.355201	0.580565
7.2	-0.155984	0.854795
7.3	0.294693	0.268268
7.4	-0.181071	1.1764
7.5	-0.406305	1.19037
7.6	0.0961371	0.751784
7.7	0.828872	0.231396
7.8	-0.115075	1.01265
7.9	0.13132	0.849052
8	-0.28147	1.1081
8.1	-0.0533383	0.700862
8.2	0.0204135	0.868196
8.3	-0.202439	0.98499
8.4	0.154585	0.589621
8.5	-0.0252588	0.859269
8.6	0.0752854	0.840941
8.7	0.269385	0.70404
8.8	0.354484	0.694824
8.9	0.670104	1.08366
9	1.05573	1.46848
9.1	0.328841	1.11462
9.2	0.551732	1.10623
9.3	0.0125965	0.934419
9.4	0.331098	0.848414
9.5	0.262732	0.635636
9.6	0.113276	0.728591
9.7	0.439126	0.84893
9.8	0.109142	0.995127
9.9	0.0187617	1.03971
10	-3.1394	1.8664
10.1	-99.6896	0.62083
10.2	-100	0
10.3	-100	0
10.4	-100	0
10.5	-100	0
10.6	-100	0
10.7	-100	0
10.8	-100	0
10.9	-100	0
11	-100	0
11.1	-100	0
11.2	-100	0
11.3	-100	0
11.4	-100	0
11.5	-100	0
11.6	-100	0
11.7	-100	0
11.8	-100	0
11.9	-100	0
12	-100	0
12.1	-100	0
12.2	-100	0
12.3	-100	0
12.4	-100	0
12.5	-100	0
12.6	-100	0
12.7	-100	0
12.8	-100	0
12.9	-100	0
13	-100	0
13.1	-100	0
13.2	-100	0
13.3	-100	0
13.4	-100	0
13.5	-100	0
13.6	-100	0
13.7	-100	0
13.8	-100	0
13.9	-100	0
14	-100	0
14.1	-100	0
14.2	-100	0
14.3	-100	0
14.4	-100	0
14.5	-100	0
14.6	-100	0
14.7	-100	0
14.8	-100	0
14.9	-100	0
15	-100	0
15.1	-100	0
15.2	-100	0
15.3	-100	0
15.4	-100	0
15.5	-100	0
15.6	-100	0
15.7	-100	0
15.8	-100	0
15.9	-100	0
16	-100	0
16.1	-100	0
16.2	-100	0
16.3	-100	0
16.4	-100	0
16.5	-100	0
16.6	-100	0
16.7	-100	0
16.8	-100	0
16.9	-100	0
17	-100	0
17.1	-100	0
17.2	-100	0
17.3	-100	0
17.4	-100	0
17.5	-100	0
17.6	-100	0
17.7	-100	0
17.8	-100	0
17.9	-100	0
18	-100	0
18.1	-100	0
18.2	-100	0
18.3	-100	0
18.4	-100	0
18.5	-100	0
18.6	-100	0
18.7	-100	0
18.8	-100	0
18.9	-100	0
19	-100	0
19.1	-100	0
19.2	-100	0
19.3	-100	0
19.4	-100	0
19.5	-100	0
19.6	-100	0
19.7	-100	0
19.8	-100	0
19.9	-100	0
20	-100	0
20.1	-98.4399	3.1201
20.2	29.8167	27.5002
20.3	39.6363	14.0927
20.4	40.2322	13.3248
20.5	39.598	13.8126
20.6	39.8218	13.2401
20.7	39.3617	13.8758
20.8	39.4804	13.7365
20.9	39.7468	13.3956
21	39.3268	13.6694
21.1	39.1504	13.6317
21.2	39.7467	12.6742
21.3	39.4523	12.9313
21.4	39.4448	12.3693
21.5	39.5448	11.9903
21.6	39.413	12.2997
21.7	39.4403	11.2665
21.8	39.2247	11.5774
21.9	39.5207	11.2658
22	39.1736	11.7305
22.1	39.5386	10.8825
22.2	38.7917	11.6765
22.3	38.7776	11.5769
22.4	38.459	11.6696
22.5	38.095	11.5364
22.6	38.3635	11.3456
22.7	38.2938	11.3069
22.8	38.5951	10.6143
22.9	37.9067	10.9201
23	37.5717	11.093
23.1	37.8381	10.9788
23.2	37.7449	10.7646
23.3	37.3364	10.7924
23.4	36.8395	11.3886
23.5	36.8096	11.525
23.6	36.0925	11.9153
23.7	35.659	12.1317
23.8	36.315	11.1142
23.9	35.7227	11.5564
24	35.0671	12.198
24.1	35.0316	11.4511
24.2	35.0286	11.4706
24.3	34.3342	12.2259
24.4	34.2466	11.6138
24.5	34.1065	11.5997
24.6	33.8963	11.9478
24.7	33.2866	12.7432
24.8	32.6588	12.6159
24.9	32.8574	12.7306
25	32.9864	12.7955
25.1	32.3903	12.7575
25.2	31.8305	13.037
25.3	31.5617	13.3631
25.4	31.0691	13.9596
25.5	30.9605	13.7924
25.6	30.6414	13.7551
25.7	30.1942	14.2532
25.8	29.6705	14.6325
25.9	29.8069	14.3996
26	29.0455	14.8872
26.1	28.8818	15.1333
26.2	28.799	15.1123
26.3	28.1126	15.4755
26.4	27.6272	15.7969
26.5	27.9553	15.7007
26.6	27.151	15.9662
26.7	26.9392	16.3314
26.8	26.558	16.7764
26.9	26.206	16.9679
27	25.7626	17.4321
27.1	25.9158	17.6006
27.2	25.2585	17.7956
27.3	24.7075	18.0304
27.4	24.4104	18.2823
27.5	24.006	18.5968
27.6	23.3508	18.9865
27.7	23.013	19.3224
27.8	22.6376	19.4573
27.9	22.5582	19.5459
28	22.4313	19.8421
28.1	21.7736	19.9279
28.2	21.7045	20.0971
28.3	21.8775	20.2014
28.4	21.1645	20.4154
28.5	19.9314	20.5591
28.6	20.0533	20.8527
28.7	19.7063	21.0265
28.8	19.2309	21.0983
28.9	18.8178	21.1964
29	18.5521	21.3742
29.1	18.0984	21.5455
29.2	18.0296	21.901
29.3	18.041	21.8863
29.4	17.3106	21.975
29.5	17.0424	22.1715
29.6	16.4124	22.1014
29.7	16.8755	22.6306
29.8	16.2549	22.6092
29.9	16.12	22.5895
30	15.6177	22.8218
30.1	15.5842	22.8481
30.2	15.0974	23.4651
30.3	14.909	23.5848
30.4	14.4362	23.6623
30.5	14.2922	23.7025
30.6	14.0727	23.5935
30.7	13.6517	23.7675
30.8	13.289	24.0304
30.9	13.3636	24.2566
31	12.8195	24.2844
31.1	12.6943	24.4785
31.2	12.0548	24.2042
31.3	11.9359	24.4804
31.4	11.7962	25.0895
31.5	11.2761	24.9443
31.6	10.7631	24.9567
31.7	10.7836	25.2028
31.8	10.3912	25.1443
31.9	10.1755	25.0904
32	9.74707	24.9607
32.1	9.05453	24.9411
32.2	9.16453	25.1657
32.3	8.80652	25.2749
32.4	8.74164	25.4468
32.5	8.7721	25.6211
32.6	8.40544	25.775
32.7	7.83045	25.5191
32.8	7.5995	25.7397
32.9	7.64925	25.6973
33	7.10577	25.5635
33.1	6.64503	25.8379
33.2	6.20909	25.7925
33.3	6.27768	25.7433
33.4	5.80564	25.5428
33.5	5.78877	25.6417
33.6	5.06027	25.5442
33.7	4.99122	25.7468
33.8	4.6902	25.8322
33.9	4.83367	25.8495
34	4.82442	25.9537
34.1	4.20545	25.9003
34.2	3.76708	25.9287
34.3	3.76239	26.0659
34.4	3.61119	26.1316
34.5	3.66864	26.2324
34.6	3.95175	26.5943
34.7	3.83474	26.6945
34.8	2.83076	26.284
34.9	2.80208	26.3988
35	2.52728	26.4264
35.1	2.23806	26.4769
35.2	1.74164	26.1792
35.3	1.50038	26.2373
35.4	1.62666	26.4373
35.5	3.53219	28.014
35.6	2.89532	27.8016
35.7	2.31375	27.3437
35.8	2.08465	27.1818
35.9	1.35305	27.0403
36	1.19083	27.1401
36.1	1.62286	27.4988
36.2	1.42371	27.3413
36.3	1.61102	27.9111
36.4	1.37784	27.782
36.5	-0.27163	26.9218
36.6	-1.37179	26.6861
36.7	-0.157308	27.3129
36.8	0.227226	28.1546
36.9	0.0845094	27.8713
37	-0.170094	27.7588
37.1	-0.921381	27.5632
37.2	-0.982475	27.2046
37.3	-1.48824	27.174
37.4	-1.76259	26.8982
37.5	-2.34134	26.7053
37.6	-3.20213	26.4431
37.7	-2.14055	27.2527
37.8	-2.20775	27.3355
37.9	-2.63711	27.1488
38	-3.62743	26.6236
38.1	-4.4029	26.303
38.2	-3.36815	26.6438
38.3	-2.7722	27.1136
38.4	-2.69049	27.096
38.5	-3.21578	26.8199
38.6	-5.41333	25.8993
38.7	-5.58924	25.8277
38.8	-5.18163	25.8322
38.9	-5.21249	26.1197
39	-5.31495	26.0694
39.1	-5.6252	25.9849
39.2	-6.34219	25.7438
39.3	-6.38146	25.8808
39.4	-6.64873	26.0073
39.5	-6.86161	26.0488
39.6	-7.79856	26.015
39.7	-7.19086	25.5116
39.8	-7.18061	25.7226
39.9	-8.10368	25.6777
40	-13.5387	28.2318
39.2
39.3
39.4
39.5
39.6
39.7
39.8
39.9
40
41
41.1
41.2
41.3
41.4
41.5
41.6
41.7
41.8
41.9
42
42.1
42.2
42.3
42.4
42.5
42.6
42.7
42.8
42.9
43
43.1
43.2
43.3
43.4
43.5
43.6
43.7
43.8
43.9
44
44.1
44.2
44.3
44.4
44.5
44.6
44.7
44.8
44.9
45
45.1
45.2
45.3
45.4
45.5
45.6
45.7
45.8
45.9
46
46.1
46.2
46.3
46.4
46.5
46.6
46.7
46.8
46.9
47
47.1
47.2
47.3
47.4
47.5
47.6
47.7
47.8
47.9
48
48.1
48.2
48.3
48.4
48.5
48.6
48.7
48.8
48.9
49
49.1
49.2
49.3
49.4
49.5
49.6
49.7
49.8
49.9
50
50.1
50.2
50.3
50.4
50.5
50.6
50.7
50.8
50.9
51
51.1
51.2
51.3
51.4
51.5
51.6
51.7
51.8
51.9
52
52.1
52.2
52.3
52.4
52.5
52.6
52.7
52.8
52.9
53
53.1
53.2
53.3
53.4
53.5
53.6
53.7
53.8
53.9
54
54.1
54.2
54.3
54.4
54.5
54.6
54.7
54.8
54.9
55
55.1
55.2
55.3
55.4
55.5
55.6
55.7
55.8
55.9
56
56.1
56.2
56.3
56.4
56.5
56.6
56.7
56.8
56.9
57
57.1
57.2
57.3
57.4
57.5
57.6
57.7
57.8
57.9
58
58.1
58.2
58.3
58.4
58.5
58.6
58.7
58.8
58.9
59
