# Supplementary material for: Elevated pyramidal cell firing orchestrates arteriolar vasoconstriction through COX-2-derived prostaglandin E2 signaling
Source: eLife. 2025 Apr 23;13:RP102424. doi: 10.7554/eLife.102424 (PMC12017770; doi:10.7554/eLife.102424)
Supplement: Figure 6—figure supplement 1—source data 1. [file elife-102424-fig6-figsupp1-data1.xls]

## Sheet: Paxilline
Stimulation
Time	BGBV-435	BGBV-443	BGBV-444	BGBV-445	BGBV-446
0	19.4995	13.9747	15.9246	20.1495	19.8245
10	19.4995	13.9747	16.5746	20.1495	19.4995
20	19.1745	14.2996	16.5746	20.4745	19.8245
30	18.5245	14.6246	16.2496	19.4995	19.8245
40	19.1745	14.9496	16.5746	20.4745	19.4995
50	18.8495	14.6246	16.2496	20.4745	19.4995
60	19.1745	14.6246	15.9246	20.4745	19.4995
70	18.8495	14.6246	15.5996	20.1495	20.1495
80	18.5245	14.6246	15.5996	20.1495	19.1745
90	18.5245	14.6246	15.2746	20.4745	18.8495
100	18.8495	14.9496	15.2746	20.7995	19.1745
110	18.5245	14.6246	15.2746	20.4745	19.1745
120	18.8495	14.6246	14.6246	20.1495	19.4995
130	18.8495	14.9496	14.6246	20.1495	19.4995
140	18.8495	14.9496	14.9496	20.4745	19.1745
150	18.8495	14.9496	15.9246	20.4745	18.8495
160	18.8495	14.6246	15.5996	20.4745	18.8495
170	19.4995	14.9496	15.5996	20.4745	19.1745
180	18.5245	14.9496	15.5996	20.4745	18.8495
190	19.4995	14.9496	15.5996	20.7995	18.8495
200	18.8495	14.9496	15.5996	20.4745	18.8495
210	19.1745	15.5996	15.9246	20.1495	18.5245
220	19.1745	14.6246	15.9246	20.7995	19.1745
230	19.1745	14.9496	16.2496	20.4745	19.4995
240	19.1745	14.9496	16.2496	20.4745	18.8495
250	19.1745	14.9496	15.9246	20.7995	19.1745
260	19.1745	15.5996	15.5996	20.7995	18.8495
270	19.1745	15.5996	14.2996	20.7995	18.5245
280	19.1745	15.9246	14.6246	21.1245	19.1745
290	19.1745	14.9496	14.6246	21.1245	19.1745
300	19.1745	14.9496	15.2746	21.1245	19.4995
310	19.4995	14.6246	15.2746	21.1245	19.1745
320	19.1745	14.6246	15.5996	21.4495	19.4995
330	19.1745	15.2746	16.2496	21.4495	19.4995
340	19.1745	14.9496	15.5996	21.1245	18.8495
350	18.8495	14.9496	15.5996	21.4495	19.4995
360	19.1745	15.2746	15.5996	21.4495	18.8495
370	19.1745	14.9496	15.9246	21.4495	19.1745
380	18.8495	14.6246	14.2996	21.4495	19.1745
390	18.8495	14.9496	14.2996	21.1245	19.4995
400	19.1745	14.6246	15.2746	21.4495	18.8495
410	18.8495	14.6246	15.2746	21.7745	18.8495
420	19.1745	14.6246	15.2746	21.4495	18.8495
430	19.1745	14.9496	15.2746	22.0994	18.8495
440	18.8495	14.9496	14.2996	22.0994	18.8495
450	19.1745	14.6246	14.2996	22.0994	19.1745
460	20.1495	14.6246	14.6246	22.0994	19.4995
470	20.1495	14.9496	14.6246	22.7494	19.1745
480	19.8245	15.2746	14.9496	23.0744	19.1745
490	19.8245	14.6246	14.2996	22.4244	19.1745
500	19.8245	14.6246	14.2996	22.7494	19.1745
510	20.1495	14.6246	16.5746	22.7494	19.4995
520	20.1495	14.9496	16.5746	22.7494	19.1745
530	20.1495	14.9496	15.9246	23.0744	18.5245
540	20.4745	14.9496	15.2746	23.0744	18.8495
550	20.4745	15.2746	14.9496	23.3994	19.4995
560	20.4745	15.2746	13.9747	22.7494	19.4995
570	20.1495	15.2746	13.3247	23.0744	19.1745
580	20.1495	15.5996	13.6497	23.7244	19.1745
590	20.4745	15.2746	13.3247	23.3994	18.8495

## Sheet: HET0016
Stimulation
Time	BGBV-479_0001	BGBV-480_0001	BGBV-482_0001	BGBV-483_0001	BGBV-485_0001	BGBV-486_0001	BGBV-488_0001	BGBV-489_0001	BGBV-491_0001	BGBV-492_0001
0	18.5245	10.3997	16.2496	17.5496	21.4495	17.2246	20.1495	13.6497	15.5996	15.5996
10	18.1995	10.3997	16.2496	17.2246	21.1245	17.2246	20.7995	13.6497	15.5996	15.5996
20	18.1995	10.3997	16.2496	17.2246	21.1245	17.5496	20.4745	13.6497	14.9496	15.9246
30	18.1995	9.74976	16.2496	17.2246	21.1245	17.2246	20.4745	13.3247	14.9496	15.9246
40	18.1995	10.3997	16.2496	16.8996	21.1245	17.2246	20.7995	13.3247	15.9246	16.2496
50	18.1995	10.0747	15.9246	17.2246	21.1245	17.2246	20.4745	13.6497	15.5996	15.9246
60	18.1995	10.3997	15.9246	17.5496	21.1245	17.2246	20.7995	13.3247	14.9496	15.9246
70	18.1995	9.74976	16.2496	17.2246	21.1245	17.8746	20.4745	13.6497	15.5996	15.5996
80	18.1995	9.74976	15.5996	17.2246	21.4495	17.8746	19.8245	13.3247	15.2746	15.9246
90	18.1995	10.3997	15.9246	16.5746	21.1245	17.5496	20.4745	13.6497	14.9496	15.9246
100	18.1995	9.74976	16.2496	16.2496	20.7995	17.5496	21.4495	13.9747	15.2746	15.9246
110	18.1995	10.3997	16.2496	16.8996	20.7995	17.2246	20.1495	13.3247	15.5996	15.5996
120	17.8746	10.3997	16.2496	16.8996	21.1245	17.2246	20.7995	13.3247	15.9246	15.9246
130	18.1995	9.74976	15.9246	16.8996	20.1495	16.8996	20.1495	13.6497	15.9246	15.5996
140	17.8746	10.0747	15.9246	16.5746	20.1495	17.2246	20.1495	13.6497	15.9246	15.9246
150	18.1995	10.0747	15.9246	16.8996	20.1495	17.2246	20.7995	13.6497	15.5996	15.9246
160	18.5245	10.0747	15.9246	16.5746	20.4745	16.8996	20.7995	13.6497	16.2496	15.9246
170	18.1995	10.3997	15.9246	16.5746	20.7995	18.1995	20.7995	13.3247	16.2496	15.9246
180	18.5245	10.3997	16.2496	16.2496	20.4745	17.5496	20.7995	13.3247	16.5746	15.9246
190	17.8746	9.74976	16.2496	16.5746	20.4745	17.5496	21.1245	13.9747	16.5746	15.5996
200	17.5496	10.0747	16.2496	16.2496	20.7995	17.5496	20.7995	13.6497	16.8996	15.5996
210	17.5496	10.0747	16.2496	16.8996	21.1245	17.2246	20.7995	13.6497	16.5746	15.9246
220	17.5496	10.0747	16.5746	16.5746	20.4745	16.8996	20.7995	13.6497	16.5746	16.2496
230	17.8746	9.74976	15.9246	16.8996	20.4745	17.8746	20.4745	12.9997	16.2496	15.9246
240	17.8746	10.0747	16.2496	16.5746	20.4745	17.2246	20.4745	13.3247	16.5746	15.9246
250	17.5496	10.0747	15.9246	16.8996	20.4745	17.5496	20.4745	13.3247	16.5746	15.9246
260	17.8746	9.74976	15.9246	17.2246	20.4745	17.5496	20.7995	13.6497	16.2496	15.9246
270	17.8746	10.3997	16.2496	16.8996	20.7995	17.5496	20.4745	13.6497	16.8996	15.9246
280	17.8746	9.74976	15.9246	17.2246	20.7995	17.5496	20.1495	12.9997	16.2496	15.2746
290	17.8746	10.0747	15.5996	17.2246	21.1245	17.5496	20.7995	13.6497	17.2246	15.9246
300	17.8746	9.74976	15.9246	16.8996	21.1245	17.5496	20.7995	13.3247	16.8996	16.2496
310	17.8746	10.0747	15.5996	17.2246	21.1245	17.2246	20.7995	12.9997	16.5746	15.9246
320	17.5496	10.7247	15.5996	16.8996	21.4495	17.2246	20.7995	13.3247	16.5746	15.9246
330	17.5496	10.0747	15.9246	16.5746	20.7995	17.2246	20.7995	13.3247	16.8996	15.9246
340	17.8746	10.3997	15.9246	16.5746	21.1245	17.2246	20.4745	13.3247	16.8996	15.9246
350	17.8746	10.7247	15.5996	17.2246	20.4745	16.8996	20.7995	13.3247	16.5746	15.9246
360	17.8746	10.3997	15.5996	16.8996	20.4745	17.2246	20.4745	13.3247	17.2246	15.9246
370	17.8746	10.7247	15.5996	17.5496	20.4745	17.5496	20.4745	12.9997	16.8996	15.5996
380	17.8746	10.7247	15.2746	17.2246	20.1495	17.2246	21.1245	13.3247	17.2246	15.9246
390	17.8746	10.3997	15.9246	17.5496	20.4745	17.2246	20.4745	13.3247	17.2246	15.5996
400	17.8746	10.3997	15.5996	16.8996	20.4745	17.5496	20.7995	13.3247	16.8996	15.5996
410	17.5496	10.0747	15.5996	17.2246	21.1245	17.5496	21.1245	13.3247	16.8996	15.2746
420	17.5496	10.0747	15.9246	17.5496	21.1245	17.8746	21.1245	12.9997	17.2246	15.5996
430	17.5496	10.7247	15.5996	16.8996	21.1245	17.8746	21.1245	13.3247	16.8996	15.5996
440	17.5496	10.3997	15.2746	17.2246	21.4495	17.8746	20.7995	13.3247	16.5746	15.5996
450	17.5496	10.7247	15.5996	17.2246	21.1245	17.5496	21.1245	13.3247	17.2246	15.9246
460	17.8746	10.7247	15.5996	17.2246	21.4495	17.8746	20.7995	13.3247	17.2246	15.9246
470	17.8746	10.7247	15.2746	17.2246	21.4495	17.8746	21.4495	13.3247	16.8996	15.9246
480	17.8746	10.3997	15.5996	17.2246	21.4495	17.5496	21.4495	13.6497	17.2246	15.5996
490	18.1995	10.3997	15.2746	17.2246	21.4495	17.2246	21.1245	13.3247	17.2246	15.9246
500	18.1995	10.0747	15.5996	17.2246	21.4495	17.8746	20.7995	13.3247	17.2246	15.9246
510	17.5496	10.0747	15.5996	16.5746	21.1245	17.8746	21.4495	12.9997	17.2246	15.5996
520	17.8746	10.0747	14.9496	17.8746	21.4495	17.5496	21.4495	12.9997	17.2246	16.2496
530	17.8746	10.7247	15.5996	16.8996	21.1245	17.5496	21.7745	13.3247	17.2246	15.5996
540	17.5496	9.74976	15.5996	17.2246	20.7995	17.8746	21.4495	12.9997	17.2246	16.2496
550	18.1995	10.3997	15.5996	16.5746	21.1245	17.8746	20.7995	13.3247	16.8996	15.5996
560	18.1995	10.3997	15.9246	16.5746	21.7745	17.5496	20.7995	12.3497	17.2246	16.2496
570	18.1995	10.7247	15.9246	16.8996	21.4495	16.8996	21.1245	12.6747	17.2246	15.2746
580	18.1995	10.3997	15.9246	16.8996	21.1245	17.5496	21.4495	13.3247	17.2246	15.5996
590	17.8746	10.3997	16.2496	16.8996	21.4495	17.8746	21.4495	12.9997	16.8996	16.2496
600	18.1995	10.0747	16.2496	16.8996	21.1245	17.5496	21.4495	12.9997	17.2246	15.5996
610	17.8746	10.3997	16.2496	16.8996	21.4495	17.5496	21.1245	12.3497	16.8996	16.2496
620	18.1995	10.3997	16.2496	16.8996	21.4495	17.5496	21.4495	12.9997	16.8996	15.9246
630	18.1995	10.3997	16.2496	16.5746	21.1245	17.2246	21.4495	12.3497	17.5496	15.9246
640	17.8746	10.7247	16.2496	16.8996	21.4495	17.5496	21.7745	12.6747	17.5496	15.5996
650	18.1995	10.3997	16.2496	16.8996	21.4495	17.5496	21.7745	12.6747	17.5496	15.5996
660	18.1995	10.0747	16.2496	16.2496	21.7745	17.2246	21.7745	12.6747	17.5496	15.5996
670	18.5245	10.3997	15.5996	16.8996	21.4495	17.5496	21.4495	12.6747	17.2246	14.9496
680	18.1995	9.74976	15.9246	16.8996	22.0994	17.5496	21.7745	12.6747	16.8996	15.5996
690	18.1995	10.3997	15.9246	16.5746	22.0994	17.5496	21.7745	12.6747	17.5496	15.5996
700	18.1995	9.42476	16.5746	16.8996	21.4495	16.8996	21.4495	12.6747	16.8996	15.5996
710	18.1995	10.0747	16.2496	16.8996	21.4495	17.2246	21.7745	12.6747	16.8996	15.5996
720	18.1995	10.0747	16.2496	17.2246	22.0994	17.2246	21.4495	12.6747	17.2246	15.9246
730	18.1995	10.3997	16.2496	16.5746	21.7745	17.2246	21.7745	12.6747	16.8996	15.9246
740	18.1995	10.7247	16.2496	16.8996	21.7745	17.8746	21.7745	12.0247	17.5496	15.9246
750	18.1995	10.3997	16.2496	16.8996	21.4495	17.5496	21.4495	12.3497	16.8996	15.9246
760	18.1995	10.3997	16.2496	16.5746	21.7745	17.8746	21.7745	12.3497	16.8996	15.9246
770	18.1995	10.0747	15.9246	16.8996	21.7745	17.5496	21.7745	12.6747	16.8996	15.5996
780	18.1995	10.0747	15.9246	16.8996	21.7745	17.8746	22.7494	12.9997	16.8996	15.5996
790	17.8746	10.3997	15.9246	16.5746	21.7745	17.8746	21.7745	12.6747	17.2246	15.5996
800	18.1995	10.3997	15.5996	17.2246	21.1245	17.8746	22.0994	12.6747	17.2246	15.2746
810	18.1995	10.3997	16.2496	17.2246	21.7745	17.8746	21.7745	12.3497	16.8996	15.9246
820	17.5496	10.0747	15.5996	16.8996	21.4495	17.8746	22.0994	12.6747	16.8996	15.9246
830	17.8746	10.0747	15.9246	16.8996	21.1245	17.8746	21.7745	12.6747	17.2246	15.2746
840	18.1995	10.3997	15.9246	17.2246	21.4495	18.1995	22.0994	12.6747	16.8996	15.5996
850	18.1995	10.0747	16.2496	16.5746	21.4495	18.1995	21.7745	12.3497	17.2246	15.5996
860	18.1995	10.0747	15.9246	16.8996	21.4495	18.1995	22.0994	12.6747	17.2246	15.9246
870	18.1995	10.7247	16.2496	17.2246	21.7745	17.8746	22.0994	12.6747	17.2246	15.5996
880	17.8746	10.7247	15.9246	16.8996	21.7745	18.1995	22.0994	12.3497	17.2246	14.9496
890	18.1995	10.3997	15.9246	17.2246	22.0994	17.8746	22.4244	12.6747	17.5496	15.2746
900	17.8746	10.7247	15.9246	17.2246	21.1245	18.1995	22.0994	12.3497	17.2246	15.2746
910	18.1995	10.3997	15.9246	16.8996	21.4495	18.1995	21.7745	12.3497	16.5746	15.2746
920	17.8746	10.3997	15.9246	17.2246	21.7745	18.1995	21.7745	12.6747	16.2496	15.5996
930	18.1995	11.0497	15.9246	16.8996	21.1245	17.8746	22.4244	12.3497	16.5746	15.5996
940	18.1995	11.6997	15.5996	16.8996	21.4495	18.1995	22.4244	12.6747	16.5746	15.9246
950	18.1995	11.0497	15.9246	16.8996	21.7745	17.8746	22.0994	12.3497	16.5746	15.9246
960	18.1995	11.0497	15.9246	16.8996	21.7745	17.8746	22.0994	12.0247	16.5746	15.5996
970	17.8746	10.3997	15.5996	16.8996	21.4495	18.1995	22.0994	12.0247	16.8996	15.5996
980	18.1995	10.3997	15.9246	17.2246	21.4495	18.1995	23.3994	12.6747	16.8996	15.5996
990	18.1995	11.0497	15.2746	16.5746	21.1245	18.1995	22.7494	12.6747	16.8996	15.5996
1000	17.8746	10.3997	15.2746	17.2246	21.4495	18.1995	22.7494	12.3497	16.8996	15.9246
1010	18.1995	11.3747	15.5996	17.5496	21.4495	18.1995	23.0744	12.9997	16.5746	15.9246
1020	18.1995	10.7247	15.5996	16.8996	21.7745	18.5245	22.7494	12.9997	17.2246	15.2746
1030	17.8746	10.3997	15.2746	17.5496	21.7745	18.5245	22.7494	12.3497	16.8996	15.5996
1040	18.1995	11.3747	15.5996	17.2246	21.7745	18.8495	22.7494	12.9997	17.5496	15.5996
1050	17.8746	10.7247	15.5996	16.8996	21.4495	18.8495	22.7494	12.3497	17.2246	15.5996
1060	17.8746	11.6997	15.5996	17.5496	21.7745	18.1995	22.4244	12.3497	17.5496	15.5996
1070	18.1995	10.0747	15.5996	17.5496	21.7745	18.8495	22.4244	12.6747	17.5496	15.2746
1080	18.1995	10.7247	15.2746	17.5496	21.7745	18.8495	22.4244	12.6747	17.2246	15.9246
1090	17.8746	10.3997	15.9246	17.2246	22.0994	18.1995	22.4244	12.6747	17.2246	15.5996
1100	18.1995	10.3997	15.5996	17.2246	21.7745	18.8495	22.0994	12.6747	17.5496	15.2746
1110	18.1995	10.0747	15.2746	17.8746	22.0994	18.8495	22.4244	12.6747	17.2246	15.5996
1120	18.1995	10.0747	15.5996	17.5496	22.0994	18.5245	22.4244	12.0247	16.8996	15.9246
1130	17.8746	10.7247	15.9246	17.8746	22.0994	18.5245	22.0994	12.0247	17.2246	15.5996
1140	18.5245	10.3997	15.9246	17.5496	22.0994	18.5245	22.4244	12.3497	16.8996	15.2746
1150	18.1995	10.3997	15.5996	17.5496	22.0994	18.1995	22.4244	12.0247	17.5496	15.5996
1160	18.1995	11.0497	15.5996	17.5496	21.1245	18.1995	22.4244	12.3497	17.2246	15.5996
1170	18.1995	11.0497	15.2746	17.5496	21.7745	18.5245	22.4244	12.0247	17.2246	15.5996
1180	18.1995	10.7247	15.5996	17.8746	22.0994	18.1995	23.0744	12.0247	17.2246	15.2746
1190	18.1995	11.6997	15.5996	17.8746	21.7745	18.5245	22.7494	12.0247	17.5496	15.2746
1200	18.5245	11.3747	15.2746	17.5496	21.7745	18.5245	22.7494	12.6747	17.8746	15.5996
1210	18.1995	11.0497	15.2746	17.8746	22.4244	18.5245	23.0744	12.0247	17.8746	15.5996
1220	17.8746	11.0497	15.2746	17.8746	22.0994	18.5245	23.0744	12.3497	17.5496	15.2746
1230	18.1995	11.0497	15.2746	17.2246	21.4495	18.8495	22.7494	11.6997	17.2246	15.2746
1240	18.1995	11.3747	15.5996	18.1995	22.0994	18.8495	23.0744	12.0247	17.2246	15.2746
1250	18.1995	11.6997	15.2746	17.5496	20.7995	18.5245	23.3994	12.0247	17.2246	15.5996
1260	18.1995	11.0497	15.2746	17.8746	20.7995	18.5245	22.7494	12.0247	17.5496	15.5996
1270	18.1995	11.3747	15.2746	17.5496	20.7995	18.1995	23.0744	12.0247	17.2246	15.5996
1280	18.1995	11.3747	15.5996	17.5496	21.1245	18.5245	22.7494	12.0247	17.5496	15.5996
1290	17.8746	10.7247	14.9496	17.5496	20.7995	18.5245	22.7494	11.6997	18.1995	14.9496
1300	18.1995	10.7247	15.5996	17.8746	20.7995	18.5245	23.0744	12.6747	17.5496	14.9496
1310	18.1995	11.3747	15.2746	17.5496	20.7995	18.5245	23.3994	11.6997	17.5496	15.2746
1320	18.5245	11.3747	15.2746	17.5496	20.7995	18.5245	23.7244	12.6747	17.5496	14.6246
1330	18.1995	11.6997	14.9496	17.5496	20.7995	18.5245	23.3994	12.6747	17.8746	14.2996
1340	17.8746	11.6997	14.9496	17.8746	20.4745	18.5245	23.7244	12.0247	17.5496	14.9496
1350	18.5245	11.0497	15.2746	17.5496	21.1245	18.5245	23.0744	12.0247	17.8746	15.2746
1360	18.5245	11.0497	15.2746	17.8746	20.7995	18.5245	23.3994	11.6997	17.5496	14.6246
1370	18.5245	11.3747	15.5996	16.8996	20.4745	18.5245	23.0744	11.0497	17.5496	15.2746
1380	18.5245	11.0497	14.9496	16.5746	21.1245	18.8495	23.3994	11.3747	17.8746	14.6246
1390	18.5245	11.0497	14.9496	16.5746	21.1245	18.5245	23.7244	11.6997	18.1995	14.9496
1400	18.5245	11.0497	14.9496	17.2246	20.7995	18.8495	23.0744	12.0247	18.1995	15.5996
1410	18.1995	11.6997	14.9496	16.5746	20.4745	18.8495	23.3994	11.3747	17.8746	14.6246
1420	18.5245	11.0497	15.2746	16.2496	20.4745	18.8495	23.3994	12.0247	17.5496	14.9496
1430	18.5245	12.0247	15.2746	16.8996	21.1245	18.8495	23.3994	11.6997	17.5496	15.2746
1440	18.1995	11.6997	14.9496	16.8996	20.7995	18.8495	23.3994	11.6997	16.8996	14.6246
1450	18.5245	11.3747	15.2746	16.5746	20.7995	18.8495	23.7244	11.0497	17.8746	15.5996
1460	18.1995	11.3747	14.9496	16.2496	20.4745	18.8495	23.3994	12.3497	17.8746	15.2746
1470	18.1995	11.3747	14.9496	16.5746	20.7995	18.8495	24.0494	12.0247	18.5245	15.2746
1480	18.5245	11.3747	14.9496	16.5746	20.7995	18.8495	24.0494	11.6997	17.5496	15.2746
1490	18.5245	11.3747	15.2746	16.2496	21.1245	18.8495	23.7244	11.0497	17.5496	15.2746
1500	18.1995	11.6997	15.2746	16.5746	20.7995	18.8495	23.7244	11.6997	18.1995	15.2746
1510	18.5245	11.3747	15.2746	16.8996	20.7995	18.5245	23.7244	12.0247	17.8746	15.5996
1520	18.1995	11.6997	15.2746	16.5746	21.1245	18.5245	23.7244	11.0497	17.8746	15.2746
1530	18.5245	11.0497	14.9496	16.2496	21.1245	18.8495	23.7244	11.3747	17.2246	15.2746
1540	18.5245	12.3497	15.2746	16.8996	21.1245	18.8495	24.3744	12.0247	17.5496	15.5996
1550	18.1995	11.3747	14.9496	16.8996	21.1245	18.8495	24.3744	11.6997	17.5496	14.9496
1560	18.1995	11.0497	15.2746	16.8996	20.7995	18.8495	23.7244	12.0247	18.5245	15.2746
1570	18.1995	11.6997	14.6246	16.2496	20.4745	18.8495	24.0494	11.6997	17.5496	14.9496
1580	18.5245	11.3747	14.9496	16.8996	21.1245	18.8495	24.0494	11.3747	17.2246	14.9496
1590	18.5245	11.6997	15.2746	16.2496	20.7995	18.8495	24.0494	12.3497	17.5496	14.9496
1600	18.1995	11.3747	15.2746	17.2246	20.4745	18.8495	24.3744	12.3497	16.8996	14.9496
1610	18.5245	12.3497	15.2746	16.5746	20.1495	19.1745	24.6994	12.3497	17.2246	14.9496
1620	18.5245	12.3497	15.2746	16.8996	20.1495	18.8495	24.0494	11.6997	16.8996	15.2746
1630	18.5245	12.3497	15.2746	16.5746	20.1495	18.8495	24.3744	11.0497	16.5746	14.9496
1640	18.1995	11.3747	15.2746	15.9246	20.4745	18.8495	24.0494	11.6997	17.2246	14.9496
1650	18.1995	12.0247	14.9496	16.8996	20.4745	19.1745	23.7244	11.0497	17.2246	15.2746
1660	18.5245	11.3747	15.9246	16.2496	20.7995	18.8495	23.7244	11.6997	17.2246	15.2746
1670	18.5245	11.6997	15.9246	16.2496	20.4745	19.1745	23.7244	11.6997	17.2246	15.2746
1680	18.1995	11.6997	15.5996	15.5996	20.1495	18.8495	24.3744	11.3747	16.8996	15.2746
1690	18.5245	11.6997	15.2746	16.8996	20.4745	19.1745	24.3744	12.0247	16.5746	14.9496
1700	18.1995	12.0247	15.5996	16.5746	20.7995	19.1745	23.3994	12.0247	16.8996	15.2746
1710	18.1995	12.3497	15.9246	16.8996	20.7995	19.1745	24.0494	12.0247	17.2246	15.2746
1720	18.1995	12.0247	15.5996	16.8996	21.1245	19.1745	24.0494	12.0247	16.5746	14.9496
1730	18.1995	11.3747	16.2496	16.8996	20.7995	19.4995	23.7244	11.6997	16.8996	15.2746
1740	18.5245	11.6997	15.5996	16.2496	21.1245	19.4995	24.3744	12.0247	17.8746	14.9496
1750	18.5245	12.6747	15.5996	16.5746	21.1245	18.8495	23.7244	11.6997	17.2246	14.9496
1760	18.5245	11.6997	15.5996	16.2496	20.4745	19.1745	23.7244	11.6997	17.8746	14.9496
1770	18.5245	11.6997	15.5996	16.2496	20.7995	19.1745	24.0494	11.6997	17.2246	15.2746
1780	18.5245	12.3497	15.9246	16.2496	20.4745	19.4995	24.0494	12.0247	17.5496	14.9496
1790	18.8495	12.6747	16.2496	16.2496	20.7995	19.4995	23.7244	11.6997	17.2246	14.9496
1800	18.1995	11.3747	15.2746	16.2496	20.4745	19.8245	24.3744	12.0247	17.5496	14.9496
1810	18.1995	11.6997	16.2496	16.2496	20.4745	19.4995	24.3744	11.0497	17.2246	14.6246
1820	18.5245	12.0247	15.2746	15.9246	20.7995	19.4995	23.7244	11.3747	17.2246	14.9496
1830	18.1995	11.6997	16.5746	16.8996	20.7995	19.8245	24.0494	12.0247	17.5496	14.9496
1840	18.1995	12.3497	15.5996	16.5746	20.7995	19.8245	23.7244	11.6997	17.5496	14.9496
1850	18.1995	12.6747	15.9246	15.5996	21.1245	19.8245	24.0494	12.0247	17.2246	15.2746
1860	18.5245	12.3497	15.2746	16.5746	20.4745	19.4995	23.7244	10.7247	16.8996	15.2746
1870	18.5245	12.0247	15.2746	16.5746	20.7995	19.8245	23.3994	11.0497	17.2246	15.2746
1880	18.1995	11.6997	15.5996	16.5746	20.7995	19.8245	23.7244	10.7247	16.8996	14.9496
1890	18.1995	12.6747	15.2746	16.5746	20.7995	19.4995	24.0494	10.3997	16.8996	15.5996
1900	18.5245	12.0247	15.2746	16.8996	21.1245	19.4995	24.0494	11.3747	17.2246	14.9496
1910	18.5245	12.3497	15.5996	15.9246	20.7995	19.8245	24.0494	11.0497	16.8996	15.2746
1920	18.5245	12.0247	15.5996	16.5746	20.7995	19.4995	23.7244	10.7247	16.8996	14.9496
1930	18.5245	12.0247	14.9496	16.5746	20.7995	19.8245	23.7244	11.6997	17.5496	15.2746
1940	18.5245	12.0247	14.9496	16.8996	20.7995	19.8245	24.0494	12.0247	17.5496	14.6246
1950	18.1995	12.6747	15.5996	16.2496	20.7995	19.8245	23.7244	11.0497	17.8746	14.6246
1960	18.1995	12.0247	15.5996	16.5746	20.4745	19.8245	23.3994	12.0247	16.8996	15.2746
1970	18.1995	12.3497	15.9246	16.5746	20.1495	19.8245	23.7244	11.6997	16.8996	14.9496
1980	18.1995	11.6997	15.2746	16.8996	20.4745	19.4995	23.3994	12.0247	16.8996	14.9496
1990	17.8746	12.0247	16.2496	16.5746	20.7995	19.8245	23.3994	11.0497	17.2246	14.9496
2000	18.1995	11.6997	15.2746	16.5746	20.4745	19.1745	24.0494	12.0247	16.8996	14.9496
2010	18.1995	11.6997	15.5996	16.2496	20.1495	19.4995	23.7244	12.0247	17.2246	14.9496
2020	18.1995	12.0247	15.2746	16.2496	20.1495	19.4995	23.7244	11.6997	16.8996	14.9496
2030	18.1995	11.3747	14.9496	16.8996	20.1495	19.4995	24.0494	12.0247	16.8996	14.9496
2040	18.1995	12.0247	15.5996	16.8996	20.1495	19.4995	24.0494	12.3497	16.8996	14.9496
2050	18.1995	12.3497	15.9246	16.8996	20.1495	19.8245	23.7244	11.6997	16.8996	14.9496
2060	18.1995	12.3497	16.2496	15.9246	20.7995	19.4995	24.3744	12.0247	16.8996	15.2746
2070	18.1995	11.6997	16.2496	15.9246	20.7995	19.4995	24.0494	11.6997	16.8996	14.9496
2080	18.1995	12.3497	15.5996	16.8996	20.7995	19.8245	24.0494	12.0247	17.5496	14.9496
2090	18.1995	12.0247	15.5996	15.5996	20.7995	19.4995	24.0494	12.3497	17.2246	15.2746

## Sheet: BIBP3226
Stimulation
Time	BGBV-493_0001	BGBV-496_0001	BGBV-497_0001	BGBV-498_0001	BGBV-499_0001	BGBV-500_0001	BGBV-501_0001	BGBV-502_0001	BGBV-503_0001	BGBV-504_0001
0	9.09977	15.2746	19.1745	15.2746	11.6997	20.4745	36.3991	34.1241	25.3494	22.4244
10	9.74976	15.5996	19.4995	14.9496	11.6997	20.4745	36.0741	34.1241	25.6744	23.0744
20	9.74976	15.5996	19.1745	14.9496	11.3747	20.4745	36.0741	34.1241	25.3494	22.7494
30	9.74976	15.5996	19.1745	14.9496	11.3747	20.4745	36.3991	33.7992	25.0244	22.0994
40	9.74976	15.5996	19.1745	14.9496	11.3747	20.7995	36.3991	34.1241	25.0244	22.4244
50	9.74976	15.5996	19.1745	15.2746	11.3747	20.7995	36.3991	33.7992	25.6744	22.4244
60	9.74976	15.5996	19.1745	15.2746	11.3747	20.7995	36.3991	34.1241	25.0244	22.4244
70	10.0747	15.9246	19.1745	14.9496	11.6997	20.1495	36.3991	34.1241	25.6744	22.4244
80	9.74976	15.9246	19.1745	15.2746	11.3747	20.7995	36.3991	34.1241	24.6994	22.4244
90	9.74976	15.9246	18.8495	15.2746	11.6997	20.4745	36.3991	34.1241	25.6744	22.0994
100	10.0747	15.9246	19.1745	15.2746	11.3747	20.4745	36.3991	34.1241	25.6744	22.0994
110	9.74976	15.5996	19.1745	15.2746	11.3747	20.7995	36.3991	34.1241	25.3494	22.0994
120	10.0747	15.9246	19.4995	14.9496	11.6997	20.4745	36.3991	34.1241	25.3494	22.4244
130	9.74976	15.9246	19.1745	14.9496	12.0247	20.4745	36.3991	34.1241	24.6994	22.0994
140	9.74976	15.9246	18.8495	14.9496	11.3747	20.7995	36.3991	34.1241	24.6994	22.7494
150	9.74976	15.5996	18.8495	15.2746	11.3747	20.7995	36.3991	34.1241	25.3494	22.7494
160	9.74976	15.5996	19.1745	14.9496	11.3747	20.7995	36.3991	34.1241	25.6744	22.0994
170	9.74976	15.5996	19.1745	15.2746	11.6997	20.7995	36.3991	34.1241	25.3494	22.7494
180	9.74976	15.9246	19.1745	15.2746	11.3747	20.7995	36.3991	34.4491	25.3494	22.4244
190	10.0747	15.9246	18.8495	15.2746	11.3747	20.7995	36.0741	34.1241	25.0244	22.4244
200	10.3997	15.9246	18.8495	15.2746	11.6997	20.4745	36.0741	34.1241	25.3494	22.7494
210	9.42476	15.5996	19.1745	14.9496	11.3747	20.7995	36.3991	34.1241	25.6744	22.0994
220	10.0747	15.9246	18.8495	15.2746	11.6997	21.1245	36.0741	33.7992	25.0244	22.7494
230	9.74976	15.9246	19.1745	15.2746	11.3747	20.7995	36.3991	34.1241	25.0244	22.7494
240	10.0747	15.9246	19.4995	15.2746	11.3747	20.7995	36.0741	33.7992	25.3494	22.4244
250	9.74976	15.9246	19.4995	15.2746	11.6997	21.1245	36.0741	33.7992	25.9994	22.7494
260	9.74976	16.2496	19.1745	15.2746	11.3747	20.7995	36.3991	33.7992	25.3494	22.0994
270	9.42476	16.2496	19.4995	15.5996	11.3747	21.1245	36.3991	33.7992	25.0244	22.4244
280	9.74976	16.2496	19.1745	15.2746	11.3747	21.1245	36.0741	33.7992	25.0244	22.4244
290	9.74976	16.2496	19.1745	15.2746	11.3747	21.1245	36.0741	33.7992	25.6744	22.0994
300	10.0747	15.9246	19.4995	14.9496	11.3747	21.1245	36.3991	33.7992	25.0244	22.7494
310	9.42476	15.9246	19.1745	15.2746	11.3747	21.4495	36.0741	33.7992	25.6744	22.7494
320	9.42476	15.9246	19.4995	15.2746	11.3747	21.1245	36.0741	33.7992	25.3494	22.7494
330	9.74976	15.9246	19.1745	15.2746	11.3747	20.7995	36.0741	33.7992	25.3494	22.0994
340	9.74976	16.2496	19.4995	15.2746	11.0497	21.1245	35.7491	33.7992	25.6744	22.0994
350	10.0747	15.9246	19.1745	15.2746	11.3747	20.7995	36.0741	33.7992	25.6744	22.4244
360	10.0747	16.5746	19.1745	14.9496	11.3747	20.7995	35.7491	33.7992	25.6744	22.0994
370	9.42476	16.2496	19.1745	15.2746	11.3747	20.4745	36.0741	33.7992	25.3494	22.7494
380	10.0747	17.2246	19.4995	15.2746	11.0497	21.1245	36.0741	33.7992	25.6744	22.0994
390	9.74976	16.8996	19.1745	15.5996	11.0497	21.1245	36.0741	33.7992	25.3494	22.4244
400	9.74976	16.2496	19.4995	15.2746	11.0497	21.1245	36.0741	33.7992	25.3494	22.0994
410	9.74976	16.2496	19.1745	15.2746	11.0497	20.7995	36.0741	33.7992	25.6744	22.4244
420	9.74976	16.5746	19.4995	15.2746	11.0497	21.1245	36.0741	33.7992	25.6744	22.7494
430	9.74976	16.2496	19.4995	15.2746	11.0497	20.7995	36.0741	33.7992	25.3494	22.4244
440	9.74976	16.5746	19.1745	15.2746	11.0497	21.1245	36.0741	33.7992	25.6744	22.4244
450	9.74976	16.5746	19.4995	15.2746	11.3747	21.7745	36.3991	33.7992	25.3494	22.4244
460	9.42476	16.5746	19.1745	15.2746	11.0497	21.4495	36.0741	33.7992	25.3494	22.0994
470	9.74976	16.5746	19.1745	15.2746	11.0497	21.4495	35.7491	33.7992	25.0244	22.0994
480	9.74976	16.8996	19.4995	15.2746	11.0497	21.4495	35.7491	33.7992	25.0244	22.4244
490	10.0747	16.8996	19.4995	15.2746	11.3747	21.4495	36.0741	33.7992	25.3494	22.4244
500	9.74976	16.8996	19.4995	15.2746	11.3747	21.4495	36.0741	33.7992	25.6744	22.4244
510	9.09977	17.2246	19.4995	14.9496	11.3747	21.4495	36.0741	34.1241	25.6744	22.4244
520	9.42476	17.2246	19.1745	15.2746	11.3747	21.4495	36.0741	34.1241	25.3494	22.0994
530	9.74976	17.2246	19.4995	15.2746	11.3747	21.4495	36.0741	34.1241	25.6744	22.0994
540	10.0747	16.8996	19.1745	14.9496	11.3747	21.1245	36.0741	34.1241	26.3243	22.0994
550	9.09977	17.2246	19.4995	15.2746	11.0497	21.7745	36.0741	33.7992	25.3494	22.0994
560	10.0747	17.2246	19.4995	14.9496	11.0497	21.7745	36.3991	33.7992	25.9994	22.4244
570	9.09977	17.2246	19.4995	15.2746	11.6997	21.7745	36.0741	34.1241	25.3494	22.0994
580	9.42476	16.8996	19.1745	14.9496	11.3747	21.7745	36.3991	34.1241	25.6744	22.4244
590	9.42476	17.2246	19.1745	14.9496	11.3747	22.0994	36.3991	34.1241	25.9994	22.4244
600	9.74976	15.9246	19.4995	14.9496	11.3747	21.7745	36.3991	34.1241	25.6744	22.0994
610	9.74976	16.2496	19.4995	14.9496	11.3747	21.7745	36.3991	34.1241	25.6744	22.0994
620	9.74976	16.2496	19.4995	14.9496	11.3747	21.7745	36.3991	33.7992	25.9994	22.0994
630	9.74976	15.9246	19.1745	14.9496	11.3747	21.7745	36.3991	34.1241	25.6744	22.4244
640	9.74976	16.2496	19.4995	14.9496	11.0497	21.7745	36.3991	33.7992	25.6744	22.4244
650	9.74976	16.2496	19.4995	15.2746	11.3747	21.7745	36.3991	34.1241	25.9994	22.7494
660	9.74976	16.2496	19.4995	14.9496	11.3747	21.4495	36.3991	34.1241	25.9994	22.0994
670	9.74976	15.9246	19.4995	15.2746	11.6997	21.7745	36.3991	34.1241	25.9994	22.4244
680	9.74976	16.5746	19.4995	14.9496	11.3747	21.7745	36.3991	33.7992	25.6744	22.0994
690	9.42476	15.9246	19.4995	14.9496	11.3747	21.7745	36.7241	33.7992	25.9994	22.4244
700	9.42476	16.2496	19.1745	14.9496	11.3747	21.4495	36.3991	34.1241	25.9994	22.0994
710	9.42476	16.2496	19.4995	15.2746	11.3747	22.0994	36.3991	33.7992	25.9994	22.0994
720	9.74976	16.2496	19.1745	15.2746	11.3747	22.0994	36.3991	33.7992	26.3243	22.4244
730	9.74976	16.2496	19.1745	15.2746	11.3747	21.7745	36.3991	34.1241	25.9994	22.4244
740	9.09977	16.2496	19.1745	14.9496	11.3747	22.0994	36.3991	33.7992	26.3243	22.0994
750	9.74976	16.2496	19.1745	14.9496	11.3747	21.7745	36.7241	33.7992	26.3243	22.0994
760	8.77478	16.5746	19.1745	15.2746	11.3747	21.7745	36.3991	33.7992	25.9994	22.0994
770	9.74976	16.2496	18.8495	14.9496	11.3747	21.7745	37.0491	33.7992	25.6744	22.0994
780	9.42476	16.2496	19.1745	15.2746	11.3747	21.7745	37.0491	33.7992	26.3243	22.0994
790	9.09977	16.2496	19.1745	14.9496	11.3747	21.7745	37.0491	33.7992	26.3243	22.4244
800	9.42476	16.2496	19.4995	14.9496	11.3747	21.7745	36.7241	33.7992	26.3243	22.0994
810	9.42476	16.2496	19.4995	14.9496	11.3747	22.0994	37.0491	33.7992	26.3243	22.0994
820	9.42476	16.2496	18.8495	14.9496	11.3747	22.0994	36.7241	33.7992	25.9994	22.4244
830	9.74976	16.2496	19.1745	14.9496	11.3747	22.0994	36.7241	33.7992	25.6744	22.0994
840	9.74976	16.2496	19.1745	14.9496	11.0497	22.0994	37.0491	33.7992	25.6744	22.4244
850	9.74976	16.5746	19.4995	14.9496	11.3747	22.0994	37.0491	33.7992	25.3494	22.4244
860	9.09977	16.8996	19.4995	14.9496	11.3747	21.7745	37.0491	33.7992	25.6744	22.0994
870	8.77478	16.5746	19.1745	14.9496	11.3747	21.7745	37.0491	33.7992	26.3243	22.4244
880	8.77478	16.2496	19.4995	14.9496	11.3747	21.7745	37.0491	33.7992	26.3243	22.0994
890	9.42476	16.5746	19.1745	15.2746	11.3747	21.7745	36.7241	33.7992	26.3243	22.0994
900	9.09977	16.5746	19.4995	14.9496	11.3747	21.7745	37.0491	33.7992	25.9994	22.0994
910	9.74976	16.8996	19.4995	14.9496	11.3747	21.7745	36.7241	33.7992	26.3243	22.7494
920	9.42476	17.2246	19.4995	14.9496	11.3747	21.4495	36.7241	33.7992	26.3243	22.0994
930	9.09977	16.8996	19.1745	14.9496	11.3747	21.7745	37.0491	33.7992	26.6493	22.0994
940	9.09977	16.5746	19.4995	14.9496	11.3747	21.4495	36.7241	33.7992	26.6493	22.4244
950	9.74976	16.5746	19.4995	14.9496	11.3747	21.7745	37.0491	33.7992	26.3243	22.0994
960	9.42476	17.2246	19.1745	14.9496	11.3747	21.7745	37.0491	33.7992	26.6493	22.0994
970	9.42476	17.5496	19.4995	14.9496	11.3747	21.7745	37.0491	33.7992	26.6493	22.0994
980	9.09977	17.5496	19.4995	14.6246	11.3747	21.7745	37.0491	33.7992	26.3243	22.0994
990	9.09977	16.8996	19.4995	14.9496	11.0497	21.4495	37.0491	33.7992	26.9743	22.7494
1000	9.42476	16.8996	19.1745	14.9496	11.0497	22.0994	37.0491	33.7992	26.9743	22.0994
1010	9.42476	16.8996	19.1745	14.9496	11.3747	21.1245	37.0491	33.7992	26.3243	22.4244
1020	9.74976	17.5496	19.1745	14.9496	11.0497	21.4495	37.0491	33.7992	26.6493	22.0994
1030	9.42476	17.2246	19.4995	14.9496	11.0497	22.0994	37.0491	33.4742	26.3243	22.0994
1040	9.74976	17.2246	19.4995	14.9496	10.7247	21.7745	37.0491	33.7992	26.6493	22.0994
1050	9.42476	17.2246	19.4995	14.9496	11.0497	22.0994	37.0491	33.7992	26.9743	22.4244
1060	9.42476	17.2246	19.1745	14.6246	10.7247	22.0994	37.0491	33.4742	26.6493	22.0994
1070	9.42476	17.2246	19.4995	14.6246	10.7247	21.7745	37.0491	33.1492	26.6493	22.0994
1080	10.0747	17.2246	19.4995	14.6246	11.3747	22.0994	37.3741	33.1492	26.9743	22.0994
1090	9.42476	17.2246	19.4995	14.9496	11.0497	21.7745	37.0491	33.1492	26.6493	22.4244
1100	9.42476	17.5496	19.4995	14.6246	10.7247	21.7745	37.0491	33.7992	26.6493	21.7745
1110	9.42476	17.2246	19.4995	14.9496	10.7247	22.0994	37.3741	33.4742	26.9743	22.0994
1120	9.42476	16.5746	19.4995	14.9496	10.7247	22.0994	37.3741	33.1492	26.6493	22.4244
1130	9.09977	16.5746	19.4995	14.9496	10.7247	22.0994	37.0491	33.1492	26.6493	22.4244
1140	9.74976	16.5746	19.4995	14.6246	11.0497	22.0994	37.0491	33.4742	26.3243	22.4244
1150	9.42476	16.5746	19.1745	14.6246	11.3747	21.7745	37.3741	33.1492	26.6493	22.7494
1160	9.42476	16.2496	19.8245	14.6246	10.7247	22.0994	37.6991	33.4742	26.9743	22.0994
1170	9.42476	16.2496	19.8245	14.9496	11.6997	22.0994	37.3741	33.4742	26.9743	22.4244
1180	9.42476	16.2496	19.4995	14.6246	11.3747	21.7745	37.6991	33.1492	26.3243	21.7745
1190	9.42476	16.2496	19.1745	14.9496	11.6997	22.0994	37.6991	33.1492	26.6493	22.0994
1200	9.42476	16.5746	19.4995	14.9496	11.6997	21.7745	37.6991	33.1492	26.9743	22.4244
1210	9.09977	16.8996	19.4995	14.6246	11.3747	21.7745	37.6991	33.7992	26.6493	22.4244
1220	9.09977	16.5746	19.4995	14.9496	11.3747	21.7745	37.6991	33.7992	26.9743	22.4244
1230	9.09977	16.5746	19.4995	14.9496	11.0497	21.7745	38.024	33.7992	26.9743	22.4244
1240	9.42476	16.5746	19.8245	14.9496	11.3747	22.4244	37.3741	33.7992	26.9743	22.4244
1250	9.09977	16.5746	19.4995	14.6246	11.3747	21.7745	37.6991	33.7992	26.9743	22.0994
1260	9.74976	16.5746	19.4995	14.9496	11.0497	21.7745	37.6991	33.7992	26.6493	22.4244
1270	9.42476	16.5746	19.4995	14.9496	11.0497	21.7745	37.6991	33.7992	26.9743	22.0994
1280	9.42476	16.2496	19.4995	14.6246	11.0497	21.7745	37.6991	33.7992	26.9743	22.4244
1290	9.42476	16.2496	19.8245	14.6246	11.0497	21.7745	38.024	33.4742	26.6493	22.0994
1300	9.42476	16.2496	19.8245	14.9496	11.0497	22.0994	37.6991	33.4742	26.9743	22.4244
1310	9.09977	16.5746	19.8245	14.9496	11.0497	22.0994	37.6991	33.7992	27.6243	22.0994
1320	9.42476	16.8996	19.8245	14.9496	11.0497	22.4244	37.6991	33.7992	26.9743	22.4244
1330	8.77478	16.5746	20.1495	14.6246	11.3747	22.4244	37.6991	33.4742	26.9743	22.0994
1340	8.77478	16.5746	19.8245	14.9496	11.3747	22.4244	37.6991	33.4742	26.9743	22.0994
1350	8.44979	16.5746	20.1495	14.9496	11.3747	22.4244	37.6991	33.4742	26.9743	22.4244
1360	8.77478	16.5746	20.1495	14.6246	11.0497	22.4244	38.024	33.4742	26.6493	22.0994
1370	9.09977	16.8996	19.4995	14.9496	10.7247	22.4244	37.6991	33.4742	27.2993	22.0994
1380	9.09977	16.2496	19.8245	14.6246	11.0497	22.4244	38.024	33.4742	27.2993	22.0994
1390	9.09977	16.2496	20.1495	14.6246	11.0497	22.7494	38.349	33.4742	26.9743	22.4244
1400	8.77478	17.5496	19.8245	14.6246	11.0497	22.4244	38.024	33.4742	26.9743	21.7745
1410	9.09977	17.5496	19.8245	14.9496	11.0497	22.7494	38.024	33.4742	26.9743	21.7745
1420	8.77478	17.5496	20.4745	14.6246	11.0497	22.4244	38.024	33.4742	27.2993	22.0994
1430	8.77478	17.5496	20.1495	14.6246	10.7247	22.4244	38.024	33.4742	27.2993	22.0994
1440	9.09977	17.5496	19.8245	14.6246	11.0497	22.7494	38.024	33.4742	26.9743	21.7745
1450	9.09977	17.5496	20.1495	14.6246	10.3997	22.7494	38.024	33.4742	26.9743	22.4244
1460	8.77478	17.5496	20.1495	14.6246	11.0497	22.4244	38.024	33.4742	26.9743	22.0994
1470	8.44979	17.5496	20.1495	14.6246	10.7247	22.4244	38.024	33.4742	26.6493	21.7745
1480	9.09977	17.5496	20.1495	14.6246	10.7247	22.4244	38.024	33.4742	26.3243	22.0994
1490	9.42476	17.5496	20.1495	14.6246	10.7247	22.4244	38.024	33.4742	26.6493	21.7745
1500	9.09977	17.5496	19.8245	14.6246	10.7247	22.4244	38.024	33.4742	26.6493	22.0994
1510	8.77478	17.5496	20.1495	14.6246	10.3997	22.7494	38.349	33.4742	26.3243	22.0994
1520	9.09977	17.5496	19.8245	14.6246	10.7247	22.7494	38.349	33.4742	26.9743	22.4244
1530	8.77478	17.5496	19.8245	14.6246	10.7247	22.7494	38.349	33.1492	26.9743	22.0994
1540	8.77478	17.5496	19.8245	14.6246	11.0497	22.4244	38.349	33.1492	26.9743	21.7745
1550	9.09977	17.5496	20.1495	14.6246	10.7247	22.7494	38.349	33.4742	27.2993	21.7745
1560	9.09977	17.5496	20.1495	14.6246	10.7247	22.7494	38.349	33.1492	26.9743	21.7745
1570	8.77478	17.5496	20.1495	14.6246	10.7247	22.4244	38.349	33.4742	26.9743	21.7745
1580	8.44979	17.5496	19.8245	14.6246	10.7247	22.7494	38.349	33.4742	26.9743	22.0994
1590	9.09977	17.8746	18.8495	14.6246	10.7247	22.7494	38.349	33.1492	27.2993	22.0994
1600	8.77478	17.5496	19.8245	14.9496	10.7247	22.4244	38.024	33.1492	27.2993	22.0994
1610	9.09977	17.8746	19.4995	14.9496	10.7247	22.7494	38.349	33.4742	27.2993	21.7745
1620	9.42476	18.1995	19.1745	14.9496	10.7247	22.7494	38.349	33.4742	27.2993	22.0994
1630	9.09977	18.5245	19.1745	14.9496	10.3997	22.4244	38.349	33.4742	26.9743	22.0994
1640	9.42476	18.1995	18.8495	14.9496	11.0497	22.4244	38.349	33.1492	27.2993	22.4244
1650	9.09977	18.1995	19.4995	14.9496	10.7247	22.4244	38.349	33.1492	27.2993	21.7745
1660	9.09977	18.1995	19.1745	14.9496	10.7247	22.7494	38.349	33.1492	27.2993	22.0994
1670	9.09977	17.8746	18.8495	14.9496	10.3997	22.4244	38.349	33.4742	27.2993	22.0994
1680	8.44979	18.1995	18.8495	14.9496	11.0497	22.4244	38.349	33.4742	26.9743	21.7745
1690	9.09977	18.1995	18.8495	14.9496	10.7247	22.4244	38.349	33.4742	27.2993	22.0994
1700	8.77478	18.1995	20.1495	14.9496	11.0497	22.4244	38.349	33.4742	26.9743	21.4495
1710	9.42476	18.1995	18.8495	14.9496	10.7247	22.7494	38.999	33.4742	26.9743	21.4495
1720	8.77478	18.1995	18.5245	14.6246	10.7247	22.4244	38.674	33.4742	27.6243	21.7745
1730	9.09977	18.1995	18.8495	14.6246	10.3997	22.7494	38.674	33.4742	26.9743	22.0994
1740	9.09977	18.1995	18.8495	14.6246	10.7247	22.4244	38.674	33.4742	26.9743	21.4495
1750	9.09977	18.1995	19.1745	14.6246	10.7247	22.7494	38.999	33.4742	26.9743	21.4495
1760	9.42476	18.1995	20.1495	14.6246	10.7247	22.4244	38.674	33.4742	26.9743	21.7745
1770	9.09977	18.1995	19.4995	14.6246	10.3997	22.7494	38.674	32.8242	27.6243	21.7745
1780	9.09977	17.8746	19.4995	14.6246	10.7247	22.4244	38.349	33.4742	27.2993	21.7745
1790	9.09977	17.8746	19.4995	14.6246	10.3997	22.7494	38.674	33.1492	26.9743	21.7745
1800	8.77478	18.1995	18.8495	14.6246	10.3997	22.4244	38.349	33.4742	26.9743	21.7745
1810	9.42476	18.1995	19.1745	14.6246	10.3997	22.4244	38.349	33.1492	27.2993	22.0994
1820	8.77478	18.1995	18.8495	14.6246	10.3997	22.4244	38.349	33.1492	27.6243	21.7745
1830	8.77478	18.1995	19.1745	14.6246	10.3997	22.4244	38.674	33.4742	27.6243	21.7745
1840	9.42476	18.1995	19.1745	14.6246	10.3997	22.7494	38.349	33.4742	26.9743	21.7745
1850	9.42476	18.1995	20.1495	14.6246	10.3997	22.7494	38.349	33.1492	27.2993	21.7745
1860	8.77478	17.8746	18.8495	14.6246	10.3997	22.7494	38.349	33.1492	27.2993	21.7745
1870	8.77478	18.5245	18.8495	14.6246	10.3997	22.7494	38.349	33.1492	27.6243	21.7745
1880	9.09977	18.5245	19.1745	14.6246	10.0747	22.0994	38.349	33.4742	26.9743	22.0994
1890	9.09977	18.1995	18.8495	14.6246	10.0747	22.7494	38.349	33.4742	27.6243	22.0994
1900	9.09977	18.1995	19.8245	14.6246	10.3997	22.0994	38.349	33.4742	27.6243	21.7745
1910	8.77478	18.1995	20.1495	14.6246	10.0747	22.0994	38.349	33.1492	27.2993	21.7745
1920	9.09977	18.1995	19.8245	14.6246	10.3997	22.4244	38.674	33.1492	27.2993	21.4495
1930	9.09977	18.1995	19.8245	14.6246	10.3997	22.4244	38.674	33.4742	27.2993	21.4495
1940	9.09977	18.1995	20.1495	14.2996	10.3997	22.4244	38.349	33.4742	26.6493	21.7745
1950	9.09977	17.8746	19.8245	14.2996	10.3997	22.4244	38.349	33.4742	26.9743	21.4495
1960	9.09977	17.5496	19.8245	14.2996	10.7247	22.0994	38.674	33.4742	27.2993	21.4495
1970	8.44979	17.8746	19.8245	14.2996	10.3997	22.4244	38.349	33.4742	27.2993	21.4495
1980	9.09977	18.1995	20.4745	14.2996	10.7247	22.4244	38.349	33.4742	27.2993	21.1245
1990	9.09977	18.1995	20.1495	14.2996	10.7247	22.0994	38.349	33.4742	27.2993	21.7745
2000	9.09977	18.1995	20.1495	14.2996	10.3997	22.4244	38.349	33.4742	26.9743	21.4495
2010	9.09977	17.8746	19.8245	13.9747	10.7247	22.4244	38.349	33.1492	27.2993	21.4495
2020	8.77478	18.5245	20.1495	13.9747	10.0747	22.7494	38.349	33.4742	26.9743	21.1245
2030	9.09977	17.8746	20.1495	14.2996	10.7247	22.4244	38.349	33.1492	27.2993	21.1245
2040	9.09977	18.1995	19.8245	14.2996	10.3997	22.7494	38.674	33.1492	26.9743	21.7745
2050	9.09977	18.1995	19.8245	13.9747	10.0747	22.4244	38.349	33.1492	27.2993	21.7745
2060	9.09977	18.5245	19.8245	14.2996	10.7247	22.4244	38.674	33.1492	27.2993	21.4495
2070	9.09977	18.5245	20.1495	13.9747	10.7247	22.7494	38.674	33.4742	27.2993	22.0994
2080	9.09977	18.5245	20.4745	14.2996	10.7247	22.4244	38.349	33.4742	27.2993	21.4495
2090	9.09977	17.8746	20.1495	14.2996	10.3997	22.7494	38.674	33.4742	27.2993	21.7745
