# Supplementary material for: Elevated pyramidal cell firing orchestrates arteriolar vasoconstriction through COX-2-derived prostaglandin E2 signaling
Source: eLife. 2025 Apr 23;13:RP102424. doi: 10.7554/eLife.102424 (PMC12017770; doi:10.7554/eLife.102424)
Supplement: Figure 6—source data 1. [file elife-102424-fig6-data1.xlsx]

## Sheet: CTRL
Stimulation
Time	BGBV-075_0000	BGBV-106_0000	BGBV-117_0000	BGBV-134_0000	BGBV-253_0000	BGBV-333_0000	BGBV-334_0000	BGBV-355_0000	BGBV-407_0000	BGBV-417_0000
0	12.35	18.8499	21.0166	24.3744	16.5746			26.9743	24.0494	19.4995
1	12.5666	18.8499	21.2333	24.0494	16.5746	24.0494	21.1245	26.6493	24.3744	19.4995
2	12.7833	18.6333	21.2333	24.0494	16.5746	23.0744	21.1245	26.9743	24.0494	19.4995
3	12.7833	19.0666	21.2333	24.0494	16.2496	23.0744	21.1245	27.2993	24.0494	19.4995
4	12.7833	19.0666	21.2333	24.0494	16.2496	23.3994	21.1245	27.2993	24.3744	19.4995
5	12.7833	18.8499	21.4499	24.0494	16.2496	23.3994	21.1245	26.6493	24.3744	19.4995
6	12.5666	18.6333	21.2333	24.0494	16.2496	22.7494	21.7745	26.6493	24.0494	19.4995
7	12.7833	18.8499	21.4499	24.0494	16.5746	23.0744	21.4495	26.6493	24.3744	19.4995
8	12.5666	18.8499	21.2333	24.0494	16.2496	22.7494	21.1245	26.9743	24.0494	19.4995
9	12.5666	18.8499	21.4499	24.0494	15.9246	23.0744	21.4495	26.6493	24.0494	19.1745
10	12.7833	18.6333	21.2333	24.0494	16.2496	23.0744	21.4495	27.2993	24.3744	19.1745
11	12.35	18.8499	21.2333	24.0494	16.2496	23.3994	21.1245	26.6493	24.0494	19.4995
12	12.5666	18.8499	21.2333	24.0494	16.2496	23.0744	21.1245	26.9743	24.3744	19.1745
13	12.5666	19.0666	21.4499	24.0494	16.2496	23.0744	20.7995	26.9743	24.0494	19.1745
14	12.5666	18.8499	21.2333	24.0494	15.9246	23.0744	21.4495	26.6493	24.0494	19.4995
15	12.5666	19.0666	21.2333	24.0494	16.2496	22.7494	21.7745	26.6493	24.0494	19.4995
16	12.7833	18.8499	21.2333	23.7244	16.5746	23.0744	21.7745	26.6493	24.3744	19.1745
17	12.35	18.8499	21.2333	24.0494	16.5746	22.7494	21.4495	26.6493	23.7244	19.4995
18	12.5666	18.6333	21.2333	24.0494	16.5746	22.7494	21.1245	27.2993	23.3994	19.4995
19	12.5666	18.6333	21.2333	24.0494	16.5746	23.3994	21.4495	26.6493	24.0494	19.8245
20	12.7833	19.0666	21.4499	24.0494	16.5746	22.7494	22.0994	26.6493	23.7244	19.1745
21	12.5666	18.6333	21.2333	24.0494	15.9246	23.0744	21.4495	26.9743	24.0494	19.4995
22	12.35	18.6333	21.2333	24.0494	16.2496	23.3994	21.4495	26.9743	24.0494	19.4995
23	12.7833	18.8499	21.4499	24.0494	16.2496	23.0744	21.4495	26.3243	24.3744	19.4995
24	12.5666	18.8499	21.2333	24.0494	16.2496	22.7494	21.7745	27.2993	23.7244	19.4995
25	12.5666	18.6333	21.4499	24.0494	16.2496	23.0744	21.4495	27.2993	24.3744	19.4995
26	12.35	18.6333	21.4499	24.0494	16.5746	23.0744	21.4495	26.6493	24.0494	19.4995
27	12.7833	18.6333	21.2333	24.3744	16.2496	23.0744	21.1245	27.2993	23.7244	19.4995
28	12.35	18.6333	21.2333	24.0494	16.2496	23.0744	21.4495	26.6493	23.7244	19.4995
29	12.35	18.8499	21.4499	24.0494	15.9246	23.0744	21.4495	26.9743	24.0494	19.4995
30	12.7833	18.8499	21.2333	24.0494	16.2496	22.7494	21.1245	26.9743	24.0494	19.4995
31					16.2496			26.9743	23.7244	19.4995
32					15.9246			26.9743	23.7244	19.4995
33					16.2496			27.2993	23.7244	19.1745
34					16.2496			26.9743	23.7244	19.4995
35					16.2496			26.9743	24.3744	19.4995
36					16.5746			27.2993	23.7244	19.4995
37					16.5746			27.2993	23.7244	19.4995
38					16.8996			27.2993	23.7244	19.4995
39					16.5746			27.2993	23.7244	19.4995
40					16.8996			27.2993	24.0494	19.4995
41	12.7833	18.6333	21.2333	24.0494	16.5746	23.3994	21.7745	26.9743	24.0494	19.4995
42	12.35	18.8499	21.4499	24.0494	16.5746	22.7494	20.4745	26.9743	23.3994	19.8245
43	12.5666	18.8499	21.2333	24.0494	16.5746	22.7494	21.1245	26.9743	24.0494	19.1745
44	12.1333	18.8499	21.2333	24.0494	16.8996	22.7494	21.7745	26.6493	23.7244	19.8245
45	12.35	18.6333	21.2333	24.0494	16.8996	23.0744	21.4495	27.2993	23.7244	19.8245
46	12.5666	18.8499	21.2333	24.0494	16.8996	22.7494	20.7995	27.2993	23.7244	19.4995
47	12.5666	18.8499	21.2333	24.0494	16.5746	23.3994	21.4495	26.9743	23.7244	19.8245
48	12.7833	18.6333	21.2333	24.0494	16.5746	23.0744	21.1245	27.2993	23.7244	19.4995
49	12.5666	18.6333	21.2333	24.0494	16.8996	22.7494	20.7995	26.9743	23.7244	19.4995
50	12.5666	18.6333	21.2333	24.0494	16.5746	23.0744	21.1245	26.9743	24.0494	19.8245
51	12.35	18.6333	21.2333	24.0494	16.5746	23.3994	21.1245	27.2993	24.0494	19.8245
52	12.5666	18.6333	21.2333	24.0494	16.8996	22.7494	21.4495	27.2993	23.7244	19.8245
53	12.5666	18.6333	21.2333	24.0494	16.2496	23.0744	21.1245	27.2993	24.0494	19.8245
54	12.35	18.8499	21.2333	24.0494	16.5746	23.0744	21.1245	27.2993	23.7244	19.4995
55	12.5666	18.8499	21.2333	24.0494	16.5746	23.3994	21.4495	27.2993	23.7244	19.8245
56	12.5666	18.8499	21.2333	24.0494	16.5746	23.0744	21.1245	26.9743	23.7244	19.8245
57	12.5666	18.8499	21.2333	24.0494	16.5746	23.0744	21.4495	27.2993	23.7244	20.1495
58	12.35	18.8499	21.2333	24.0494	16.2496	23.3994	21.4495	27.2993	23.7244	19.8245
59	12.1333	18.8499	21.0166	24.0494	15.9246	23.3994	21.4495	26.9743	23.7244	19.4995
60	12.5666	18.8499	21.2333	24.0494	16.2496	23.7244	21.4495	26.6493	24.0494	19.4995
61	12.35	18.6333	21.0166	24.3744	15.9246	23.3994	21.1245	27.2993	23.7244	19.8245
62	12.35	18.8499	21.0166	24.0494	16.2496	23.0744	21.1245	26.9743	23.7244	18.8495
63	12.35	18.6333	21.2333	23.7244	16.2496	23.3994	21.4495	26.6493	24.0494	20.1495
64	12.35	18.8499	20.7999	24.0494	16.2496	23.3994	21.4495	26.9743	23.7244	19.4995
65	12.35	18.8499	21.2333	23.7244	16.2496	23.3994	21.1245	26.6493	24.0494	19.4995
66	12.1333	18.8499	21.0166	23.7244	16.2496	23.3994	21.1245	26.6493	24.0494	19.4995
67	11.9166	18.8499	20.7999	23.7244	16.2496	23.0744	20.7995	26.3243	23.7244	19.4995
68	12.1333	18.6333	20.7999	23.7244	16.2496	23.0744	21.4495	26.6493	23.7244	19.4995
69	12.35	18.8499	20.5833	23.7244	16.2496	22.4244	21.4495	26.3243	23.7244	19.4995
70	11.9166	18.6333	20.7999	23.7244	16.2496	22.0994	21.1245	25.9994	23.7244	19.1745
71	12.1333	18.8499	20.7999	23.7244	15.9246	22.4244	21.4495	25.9994	23.7244	18.8495
72	12.35	18.6333	20.7999	23.7244	15.9246	23.0744	21.4495	26.3243	24.0494	19.1745
73	11.9166	19.0666	20.7999	23.7244	16.2496	23.0744	21.4495	25.9994	23.7244	19.4995
74	12.35	18.8499	20.7999	23.3994	15.9246	23.0744	21.4495	25.9994	23.7244	19.1745
75	11.7	18.8499	20.3666	23.7244	15.9246	23.3994	21.1245	25.9994	24.0494	18.8495
76	11.9166	18.8499	20.3666	23.0744	16.2496	23.7244	21.4495	25.9994	23.7244	19.1745
77	12.35	18.6333	20.3666	23.3994	16.5746	23.3994	21.1245	26.3243	23.7244	18.8495
78	11.9166	18.8499	20.3666	23.3994	16.2496	23.0744	21.1245	25.3494	24.0494	18.8495
79	11.9166	18.4166	20.5833	23.0744	15.9246	23.0744	21.1245	25.3494	24.0494	18.8495
80	11.7	18.6333	20.3666	23.0744	15.9246	23.0744	21.1245	25.3494	24.0494	18.5245
81	11.7	18.6333	20.3666	23.0744	16.2496	23.0744	21.1245	25.0244	23.7244	18.5245
82	12.1333	18.6333	19.9333	23.0744	16.2496	22.7494	21.4495	25.0244	24.0494	18.5245
83	11.9166	18.6333	20.1499	23.0744	16.2496	23.0744	21.1245	25.0244	24.0494	19.1745
84	11.7	18.6333	20.3666	23.0744	16.5746	22.7494	20.7995	25.3494	23.3994	18.8495
85	11.7	18.6333	20.1499	23.0744	16.2496	22.7494	21.4495	25.3494	23.7244	18.5245
86	11.7	18.6333	20.1499	23.0744	16.2496	22.7494	20.1495	24.6994	23.7244	18.8495
87	11.9166	18.6333	19.9333	23.0744	16.2496	22.7494	20.4745	24.6994	24.0494	18.8495
88	11.4833	18.4166	19.9333	23.0744	16.2496	22.7494	20.7995	25.0244	24.0494	18.1995
89	11.7	18.4166	20.1499	22.7494	16.2496	23.3994	21.1245	24.6994	23.7244	17.8746
90	11.9166	18.6333	19.7166	23.0744	16.2496	22.7494	20.4745	24.0494	24.0494	18.5245
91	11.4833	18.6333	19.7166	22.7494	16.8996	23.3994	20.7995	25.0244	23.7244	18.5245
92	11.9166	18.6333	20.1499	22.7494	16.8996	22.7494	21.1245	24.3744	23.7244	17.8746
93	11.4833	18.1999	19.9333	22.7494	16.8996	22.7494	21.1245	24.3744	23.3994	18.1995
94	11.7	18.4166	19.7166	22.7494	16.5746	23.0744	21.1245	24.6994	23.7244	18.1995
95	11.4833	18.6333	19.7166	22.7494	16.5746	23.0744	20.7995	24.3744	23.7244	18.1995
96	11.7	18.4166	19.4999	22.4244	16.5746	23.3994	20.4745	24.0494	23.7244	18.1995
97	11.2666	18.6333	19.9333	22.4244	16.5746	22.7494	21.1245	23.7244	23.7244	18.8495
98	11.7	18.1999	19.7166	22.4244	16.5746	23.0744	20.7995	24.0494	23.7244	18.1995
99	11.2666	18.4166	19.9333	22.4244	16.5746	23.0744	21.1245	24.3744	23.7244	18.1995
100	11.2666	18.4166	19.2833	22.4244	16.5746	22.7494	20.4745	23.3994	23.3994	18.1995
101	11.7	18.1999	19.4999	22.4244	16.5746	22.7494	20.7995	23.7244	23.3994	18.1995
102	11.2666	18.4166	19.7166	22.4244	16.2496	23.0744	20.1495	23.7244	23.3994	18.1995
103	11.2666	18.4166	19.2833	22.4244	16.5746	23.0744	20.7995	23.3994	23.3994	17.8746
104	11.9166	18.4166	19.2833	22.4244	16.5746	23.0744	20.7995	24.3744	23.3994	18.1995
105	11.4833	18.4166	19.4999	22.4244	16.2496	23.3994	20.7995	24.0494	23.3994	17.8746
106	11.7	18.4166	19.2833	22.4244	16.2496	23.0744	20.4745	23.7244	23.0744	17.8746
107	11.4833	18.1999	19.2833	22.4244	15.9246	23.0744	20.1495	23.7244	23.0744	17.8746
108	11.7	18.4166	19.4999	22.4244	16.2496	23.0744	20.4745	23.7244	23.7244	17.8746
109	11.4833	18.1999	19.0666	22.4244	15.9246	23.0744	20.7995	23.7244	22.7494	18.1995
110	11.4833	18.4166	19.2833	22.4244	15.9246	23.3994	20.1495	23.7244	23.3994	17.8746
111	11.4833	18.4166	19.0666	22.4244	16.5746	22.7494	20.1495	23.7244	23.0744	18.1995
112	11.7	18.4166	18.8499	22.4244	15.9246	22.4244	20.7995	23.3994	23.3994	18.1995
113	11.4833	18.4166	19.0666	22.4244	15.9246	22.4244	21.1245	23.0744	22.7494	17.8746
114	11.7	18.4166	19.2833	22.0994	16.2496	23.0744	20.1495	23.7244	23.0744	17.8746
115	11.7	18.4166	18.8499	22.4244	15.9246	23.0744	20.4745	23.3994	22.4244	18.1995
116	11.4833	18.1999	18.8499	22.0994	16.2496	23.0744	20.4745	23.0744	22.4244	17.5496
117	11.9166	18.4166	19.0666	22.0994	16.8996	23.0744	20.4745	23.0744	22.4244	17.8746
118	11.9166	18.4166	19.0666	22.0994	16.5746	23.3994	20.1495	22.7494	23.0744	18.1995
119	11.7	18.4166	18.8499	21.7745	16.5746	22.4244	20.1495	22.7494	22.4244	17.8746
120	11.7	18.4166	18.8499	22.0994	15.9246	23.0744	20.4745	22.7494	22.4244	18.1995
121	11.7	18.6333	18.6333	22.0994	16.2496	22.7494	19.8245	22.7494	22.0994	17.8746
122	11.9166	18.1999	18.8499	21.7745	16.5746	22.7494	20.1495	23.0744	22.4244	17.8746
123	11.7	18.1999	19.0666	21.7745	16.5746	23.3994	20.4745	23.3994	22.4244	17.8746
124	11.4833	18.1999	19.0666	22.0994	16.5746	23.3994	20.1495	23.0744	22.4244	17.8746
125	11.4833	18.1999	18.6333	21.7745	16.5746	22.7494	20.4745	23.0744	21.7745	17.8746
126	11.7	18.1999	18.6333	22.0994	16.5746	22.7494	20.1495	23.0744	22.0994	17.8746
127	11.2666	18.1999	18.6333	22.0994	16.5746	22.7494	20.1495	23.0744	22.4244	17.8746
128	11.9166	18.1999	18.6333	22.0994	15.9246	23.0744	20.1495	23.0744	22.0994	17.8746
129	11.4833	18.4166	18.8499	22.0994	16.5746	22.7494	20.1495	22.7494	22.7494	17.5496
130	11.7	18.4166	18.6333	22.4244	16.5746	23.0744	20.1495	22.7494	22.4244	17.8746
131	11.4833	17.7666	18.8499	22.4244	16.2496	23.3994	20.1495	22.7494	21.7745	17.8746
132	11.9166	17.7666	19.0666	21.7745	16.5746	22.7494	19.8245	22.7494	22.0994	17.8746
133	11.4833	17.3333	18.4166	21.7745	16.5746	22.7494	20.7995	23.3994	21.7745	17.8746
134	11.4833	17.5499	18.6333	21.4495	16.5746	23.3994	20.1495	22.7494	21.7745	17.8746
135	11.9166	17.5499	18.8499	21.4495	16.5746	22.7494	20.1495	23.0744	22.0994	17.8746
136	11.7	17.5499	18.6333	21.4495	16.8996	23.0744	20.1495	23.0744	21.4495	18.1995
137	11.4833	17.3333	19.0666	21.4495	15.9246	23.0744	19.8245	22.4244	21.7745	18.1995
138	11.9166	17.3333	18.6333	21.4495	16.2496	23.3994	20.1495	23.0744	22.4244	18.1995
139	11.7	17.5499	18.8499	21.4495	16.5746	22.7494	19.4995	23.0744	22.0994	17.8746
140	11.9166	17.3333	18.6333	21.4495	16.5746	22.7494	20.4745	23.0744	21.4495	17.8746
141	11.7	17.3333	18.4166	21.4495	16.8996	23.3994	19.8245	22.4244	21.7745	18.5245
142	11.2666	17.3333	18.6333	21.1245	16.5746	22.7494	19.4995	23.3994	21.7745	18.1995
143	11.7	17.5499	19.0666	21.4495	16.8996	22.7494	19.8245	23.0744	21.4495	18.1995
144	11.9166	17.3333	18.8499	21.4495	16.2496	22.7494	19.8245	23.0744	21.7745	18.5245
145	11.7	17.3333	18.8499	21.4495	16.2496	22.4244	20.4745	22.7494	22.0994	18.5245
146	11.7	17.3333	19.0666	21.1245	16.8996	22.0994	20.1495	22.4244	21.4495	18.5245
147	11.7	17.3333	18.8499	21.4495	16.5746	22.7494	19.1745	22.7494	21.7745	17.8746
148	11.4833	17.1166	18.8499	21.4495	16.5746	22.4244	19.4995	22.4244	21.4495	17.8746
149	11.9166	17.3333	18.6333	21.1245	16.8996	22.7494	19.8245	22.4244	21.4495	18.1995
150	11.9166	17.1166	18.8499	21.1245	16.8996	22.7494	19.8245	22.7494	22.0994	17.8746
151	11.7	17.3333	18.6333	21.1245	16.5746	22.4244	19.4995	22.7494	20.7995	18.1995
152	11.9166	17.3333	18.6333	21.1245	16.2496	23.0744	19.4995	22.7494	21.4495	17.8746
153	11.7	17.5499	18.8499	21.1245	16.2496	23.0744	19.4995	23.0744	21.4495	17.8746
154	11.9166	17.5499	18.6333	21.1245	16.8996	23.0744	19.4995	23.0744	20.7995	17.8746
155	11.4833	17.1166	18.8499	21.1245	16.5746	23.3994	20.1495	23.0744	20.7995	17.8746
156	12.1333	17.5499	18.6333	21.1245	16.5746	23.0744	19.4995	23.0744	20.4745	18.1995
157	11.9166	17.3333	18.4166	21.1245	16.2496	22.7494	18.8495	23.3994	20.7995	17.8746
158	12.35	17.5499	18.6333	21.1245	16.8996	22.7494	19.1745	23.0744	20.7995	17.5496
159	11.7	17.5499	18.4166	21.1245	16.2496	23.3994	19.4995	23.0744	20.7995	17.8746
160	11.9166	17.5499	18.6333	21.1245	16.8996	23.3994	19.4995	23.0744	21.1245	17.8746
161	11.4833	17.5499	18.6333	21.1245	16.2496	22.7494	19.8245	23.3994	21.1245	17.5496
162	11.7	17.7666	18.6333	21.1245	16.2496	23.3994	19.8245	23.0744	20.4745	17.8746
163	11.9166	17.7666	18.6333	21.1245	15.9246	23.0744	19.1745	23.0744	20.1495	17.5496
164	12.1333	17.5499	18.6333	21.1245	16.2496	23.0744	19.8245	23.3994	20.7995	18.1995
165	11.9166	17.7666	18.4166	21.1245	16.2496	23.3994	18.8495	23.0744	20.7995	17.5496
166	11.7	17.7666	18.1999	21.1245	15.5996	23.0744	19.8245	23.0744	20.7995	17.5496
167	11.9166	17.7666	18.1999	21.1245	15.9246	23.0744	18.8495	23.3994	20.1495	17.8746
168	12.1333	18.1999	18.4166	21.1245	15.9246	23.0744	19.4995	23.3994	20.4745	17.5496
169	11.7	17.7666	18.4166	21.1245	15.9246	23.3994	19.1745	23.3994	20.1495	17.8746
170	12.1333	17.9833	18.1999	21.1245	15.5996	22.7494	19.1745	23.0744	20.1495	18.1995
171	11.9166	17.7666	18.8499	21.1245	15.9246	22.4244	19.4995	23.3994	20.1495	17.8746
172	11.7	17.7666	18.1999	20.7995	15.5996	23.0744	19.1745	23.7244	20.4745	18.1995
173	11.4833	17.7666	19.0666	21.1245	15.9246	23.0744	19.4995	23.7244	20.4745	18.8495
174	11.7	17.7666	18.8499	21.1245	15.5996	22.7494	19.4995	23.7244	20.1495	18.5245
175	11.4833	17.7666	19.0666	21.1245	15.5996	23.3994	19.1745	23.3994	20.1495	18.1995
176	11.4833	17.7666	18.6333	20.7995	15.5996	23.0744	18.8495	24.0494	19.8245	17.8746
177	12.1333	17.7666	18.6333	21.1245	15.2746	22.4244	19.1745	23.7244	20.7995	18.1995
178	11.7	17.7666	18.8499	21.1245	15.5996	23.0744	19.4995	23.7244	20.7995	17.8746
179	11.7	17.5499	18.4166	21.1245	15.5996	22.7494	20.1495	23.3994	20.4745	18.1995
180	11.7	17.5499	18.4166	21.1245	15.5996	23.0744	18.5245	23.7244	20.4745	17.8746
181	11.7	17.5499	18.6333	21.1245	14.9496	22.7494	18.8495	23.7244	21.1245	18.1995
182	11.9166	17.5499	18.8499	21.1245	15.2746	22.4244	19.1745	23.7244	21.1245	18.5245
183	11.9166	17.5499	18.8499	21.1245	15.9246	22.7494	19.4995	24.0494	21.1245	18.1995
184	11.7	17.5499	18.4166	21.1245	15.9246	22.4244	19.1745	23.7244	20.1495	18.1995
185	11.9166	17.3333	18.6333	21.1245	15.5996	22.7494	18.8495	24.0494	21.4495	18.5245
186	11.9166	17.5499	18.6333	21.1245	15.9246	22.4244	18.8495	24.0494	20.7995	18.5245
187	11.7	17.3333	18.8499	21.1245	15.5996	22.4244	18.8495	23.7244	20.4745	18.1995
188	11.7	17.5499	18.6333	21.1245	15.2746	23.3994	19.8245	23.7244	21.1245	17.8746
189	11.7	17.7666	18.8499	21.1245	15.5996	22.7494	19.1745	23.7244	21.4495	17.8746
190	11.7	17.5499	18.6333	21.1245	15.9246	23.0744	19.4995	24.0494	20.4745	18.1995
191	11.7	17.5499	18.6333	21.1245	15.5996	22.7494	19.1745	24.0494	20.7995	17.8746
192	11.7	17.7666	18.6333	21.1245	15.9246	22.7494	18.8495	24.0494	20.4745	17.8746
193	11.7	17.7666	18.8499	21.1245	15.5996	22.7494	19.1745	23.7244	20.7995	18.5245
194	11.4833	17.5499	18.6333	21.4495	15.5996	22.7494	19.4995	24.3744	21.1245	17.8746
195	12.1333	17.5499	18.8499	21.4495	15.5996	22.7494	19.4995	24.0494	20.7995	18.5245
196	11.7	17.7666	18.8499	21.1245	15.5996	23.0744	18.8495	24.3744	21.1245	18.1995
197	11.7	17.7666	18.6333	21.1245	15.9246	22.7494	18.8495	24.3744	20.4745	18.8495
198	11.7	17.7666	18.8499	21.1245	14.2996	23.0744	18.8495	24.3744	20.4745	18.8495
199	11.9166	17.9833	18.6333	21.1245	15.2746	22.7494	19.1745	24.0494	20.7995	18.5245
200	11.7	17.9833	18.6333	21.4495	15.9246	23.3994	19.1745	24.0494	21.1245	18.8495
201	11.7	17.7666	18.4166	21.4495	15.5996	23.0744	19.4995	24.3744	20.7995	18.8495
202	11.7	17.9833	18.8499	21.4495	15.5996	23.0744	18.8495	23.7244	20.7995	18.8495
203	11.9166	17.7666	18.6333	21.4495	15.9246	22.7494	18.8495	24.3744	20.7995	18.8495
204	11.7	17.5499	18.6333	21.4495	15.9246	23.0744	18.8495	24.0494	20.7995	18.5245
205	11.4833	17.5499	19.0666	21.4495	15.2746	22.7494	19.1745	24.0494	20.4745	18.5245
206	11.7	17.5499	18.8499	21.4495	15.9246	23.3994	19.1745	24.3744	20.7995	18.8495
207	11.9166	17.5499	18.8499	21.4495	15.5996	23.0744	18.8495	24.0494	21.4495	18.5245
208	11.9166	17.5499	18.4166	21.7745	14.9496	22.7494	19.1745	24.3744	20.1495	18.5245
209	12.1333	17.7666	18.8499	21.4495	15.2746	22.4244	18.8495	24.3744	20.4745	18.8495
210	11.7	17.5499	18.8499	21.4495	14.9496	23.0744	18.8495	24.3744	20.4745	18.5245
211	12.1333	17.5499	18.8499	21.4495	15.2746	22.7494	18.8495	24.0494	20.4745	19.1745
212	11.9166	17.7666	19.0666	21.4495	15.2746	22.7494	19.1745	24.3744	20.4745	19.1745
213	11.7	17.5499	19.0666	21.4495	15.2746	23.0744	18.8495	24.3744	20.1495	18.8495
214	11.9166	17.5499	18.8499	21.7745	15.2746	23.0744	19.1745	24.3744	20.1495	19.1745
215	11.9166	17.5499	18.8499	21.7745	15.2746	22.7494	18.8495	24.6994	21.1245	19.1745
216	11.7	17.5499	18.8499	21.4495	15.5996	22.4244	19.1745	24.3744	20.7995	18.8495
217	11.7	17.3333	18.8499	21.4495	15.2746	22.4244	18.8495	24.0494	20.7995	18.5245
218	11.9166	17.3333	18.8499	21.7745	15.2746	22.7494	18.8495	24.6994	21.4495	18.5245
219	11.9166	17.5499	18.8499	21.4495	14.9496	23.0744	18.5245	24.3744	21.1245	19.1745
220	11.7	17.5499	18.8499	21.7745	15.2746	22.7494	19.1745	24.3744	20.4745	19.1745
221	11.9166	17.3333	18.8499	21.7745	15.5996	23.3994	18.8495	24.6994	19.8245	19.1745
222	11.9166	17.3333	19.0666	21.7745	15.9246	22.7494	18.8495	24.6994	20.1495	19.1745
223	11.7	17.3333	18.8499	21.7745	15.5996	22.7494	18.8495	24.3744	20.4745	18.8495
224	11.9166	17.3333	19.0666	21.4495	15.5996	23.0744	18.8495	24.6994	19.8245	18.8495
225	11.9166	17.5499	19.0666	21.4495	15.5996	22.7494	18.5245	24.6994	20.1495	18.8495
226	11.9166	17.3333	19.0666	21.4495	15.5996	22.7494	18.1995	24.3744	20.7995	19.1745
227	11.9166	17.5499	18.8499	21.7745	15.9246	23.0744	17.8746	24.6994	20.4745	18.5245
228	11.9166	17.1166	18.8499	21.7745	15.5996	22.4244	18.1995	24.3744	19.8245	18.8495
229	11.9166	17.3333	19.0666	21.7745	15.5996	23.0744	18.5245	24.6994	20.4745	18.8495
230	11.9166	17.3333	18.8499	21.7745	15.5996	23.0744	18.5245	24.6994	20.4745	19.1745
231	11.9166	17.3333	18.8499	21.7745	15.9246	23.0744	17.8746	24.6994	19.8245	18.5245
232	11.4833	17.5499	19.0666	21.4495	15.2746	22.0994	18.5245	24.3744	20.4745	19.1745
233	11.9166	17.5499	18.8499	21.7745	15.9246	22.0994	18.8495	24.6994	20.1495	18.8495
234	11.9166	17.3333	18.8499	21.4495	15.5996	23.0744	18.5245	25.0244	20.1495	19.1745
235	11.7	17.3333	19.0666	21.7745	15.9246	22.4244	17.8746	25.0244	20.7995	18.8495
236	11.7	17.3333	19.0666	21.4495	15.5996	22.4244	18.5245	24.0494	20.7995	18.5245
237	11.9166	17.3333	18.8499	21.4495	15.5996	22.4244	18.1995	25.0244	20.7995	18.5245
238	11.7	17.5499	19.2833	22.0994	15.5996	23.0744	18.8495	24.6994	20.1495	18.1995
239	11.7	17.5499	19.2833	21.7745	15.9246	22.4244	18.5245	24.6994	20.1495	18.5245
240	11.7	17.5499	19.2833	21.4495	15.9246	23.0744	18.1995	25.0244	20.4745	18.8495
241	11.7	17.5499	19.2833	21.4495	16.2496	22.7494	18.1995	25.0244	21.4495	18.5245
242	11.9166	17.3333	19.4999	21.7745	16.2496	22.7494	18.5245	25.3494	20.1495	18.8495
243	11.9166	17.3333	19.2833	21.7745	15.9246	22.7494	18.5245	24.6994	20.4745	18.5245
244	11.7	17.5499	19.2833	21.7745	15.9246	22.4244	18.1995	25.0244	20.4745	18.5245
245	11.7	17.5499	19.0666	21.7745	16.2496	23.3994	18.1995	25.0244	20.7995	18.8495
246	11.7	17.5499	19.0666	21.4495	15.9246	22.7494	18.1995	24.6994	20.7995	18.5245
247	11.4833	17.3333	19.2833	21.7745	16.2496	22.7494	18.5245	25.0244	20.1495	18.5245
248	11.7	17.1166	19.2833	21.4495	15.9246	22.7494	18.1995	25.0244	20.4745	18.5245
249	11.7	17.3333	19.2833	21.7745	15.9246	22.7494	18.5245	24.6994	21.1245	18.8495
250	11.7	17.3333	19.4999	21.4495	15.9246	22.4244	18.5245	25.3494	20.7995	18.5245
251	11.7	17.3333	19.2833	21.4495	15.9246	22.4244	18.1995	24.6994	20.4745	18.5245
252	11.4833	17.3333	19.0666	22.0994	15.9246	23.0744	18.5245	25.0244	20.7995	18.5245
253	11.7	17.3333	19.2833	21.7745	15.9246	23.0744	18.1995	25.6744	19.8245	18.5245
254	11.9166	17.5499	19.0666	21.7745	15.9246	22.7494	18.5245	25.3494	20.4745	19.1745
255	11.7	17.3333	19.2833	21.7745	15.9246	23.0744	18.5245	25.0244	20.1495	18.8495
256	11.4833	17.3333	19.2833	21.4495	15.9246	22.7494	18.8495	25.0244	20.7995	19.1745
257	11.7	17.3333	19.4999	21.7745	15.9246	22.7494	18.1995	24.6994	20.7995	18.1995
258	11.4833	17.5499	19.4999	21.7745	15.5996	22.0994	18.5245	25.0244	21.1245	18.5245
259	11.7	17.3333	19.4999	22.0994	15.9246	22.4244	18.5245	25.3494	21.1245	19.1745
260	11.4833	17.3333	19.2833	21.4495	15.9246	22.7494	18.1995	25.0244	21.1245	18.5245
261	11.7	17.5499	19.4999	22.0994	15.9246	22.0994	18.1995	25.0244	20.4745	18.8495
262	11.7	17.3333	19.4999	21.7745	16.2496	22.0994	18.8495	25.3494	21.1245	19.1745
263	11.7	17.5499	19.4999	22.0994	15.9246	22.7494	18.5245	25.0244	20.4745	18.8495
264	11.4833	17.5499	19.2833	21.7745	15.5996	23.0744	18.5245	25.0244	20.4745	18.5245
265	11.7	17.3333	19.4999	22.0994	15.9246	23.0744	18.1995	25.0244	20.7995	18.8495
266	11.2666	17.3333	19.4999	21.7745	15.9246	22.7494	18.5245	25.3494	20.7995	18.5245
267	11.7	17.3333	19.4999	22.0994	15.9246	22.4244	17.8746	24.6994	20.4745	18.8495
268	11.7	17.3333	19.4999	22.0994	15.9246	22.4244	18.5245	25.3494	20.4745	18.5245
269	11.2666	17.3333	19.4999	22.0994	15.9246	22.7494	18.1995	25.3494	20.4745	18.5245
270	11.4833	17.1166	19.2833	22.0994	15.9246	22.7494	18.5245	25.0244	20.1495	18.8495
271	11.4833	17.5499	19.2833	21.7745	16.2496	22.4244	17.5496	25.0244	20.4745	18.8495
272	11.4833	17.3333	19.4999	22.0994	15.5996	22.7494	18.5245	24.6994	20.7995	18.8495
273	11.9166	17.3333	19.2833	22.0994	15.9246	22.4244	18.5245	25.3494	20.4745	18.5245
274	11.4833	17.1166	19.4999	22.0994	15.9246	23.0744	18.1995	25.3494	20.4745	18.8495
275	11.7	17.3333	19.2833	22.0994	15.9246	22.7494	18.1995	25.0244	20.1495	18.5245
276	11.9166	17.3333	19.2833	22.0994	15.9246	22.7494	18.5245	25.3494	19.8245	18.5245
277	11.7	17.3333	19.2833	21.7745	15.9246	22.7494	18.5245	25.3494	20.1495	18.8495
278	11.7	17.1166	19.4999	21.7745	16.2496	23.0744	18.1995	25.0244	20.1495	18.8495
279	11.4833	17.3333	19.4999	21.4495	15.9246	22.4244	18.8495	24.6994	19.8245	18.5245
280	11.4833	17.1166	19.4999	21.7745	15.9246	23.0744	18.5245	25.3494	20.1495	18.8495
281	11.9166	17.1166	19.4999	21.7745	16.2496	22.4244	18.8495	25.3494	20.1495	18.8495
282	11.4833	17.3333	19.2833	22.0994	15.9246	22.0994	18.1995	25.3494	19.8245	18.5245
283	11.2666	17.1166	19.4999	22.0994	15.9246	22.4244	18.5245	25.3494	20.1495	18.8495
284	11.2666	17.3333	19.4999	22.0994	15.2746	22.7494	18.8495	25.6744	20.1495	18.8495
285	11.4833	17.1166	19.2833	21.7745	15.9246	22.7494	18.5245	25.6744	19.1745	18.5245
286	11.4833	17.1166	19.2833	22.0994	15.5996	22.7494	18.1995	25.3494	19.4995	18.5245
287	11.9166	17.3333	19.2833	22.0994	15.2746	22.7494	18.5245	25.6744	19.4995	18.8495
288	11.4833	17.1166	19.2833	21.7745	16.2496	22.4244	18.5245	25.0244	20.1495	18.8495
289	11.7	17.3333	19.2833	22.0994	15.5996	22.7494	18.5245	24.6994	19.4995	18.8495
290	11.7	17.3333	19.2833	21.7745	15.5996	22.4244	18.5245	25.3494	20.7995	18.8495
291	11.4833	17.1166	19.4999	22.0994	15.9246	22.4244	18.5245	25.9994	20.1495	18.8495
292	11.4833	17.1166	19.2833	21.7745	15.9246	22.4244	18.5245	25.3494	20.1495	18.5245
293	11.9166	17.1166	19.2833	22.0994	15.9246	22.7494	18.5245	25.3494	19.8245	18.8495
294	11.4833	17.3333	19.2833	21.7745	16.2496	22.7494	18.1995	25.0244	20.4745	18.5245
295	11.7	17.1166	19.2833	22.0994	15.5996	22.4244	18.1995	25.3494	20.7995	18.5245
296	11.2666	17.1166	19.2833	21.7745	15.9246	22.7494	18.5245	25.6744	20.4745	18.1995
297	11.9166	17.1166	19.4999	21.7745	15.9246	22.7494	18.5245	25.3494	20.4745	18.1995
298	11.7	17.1166	19.2833	21.7745	15.9246	23.0744	18.5245	25.3494	20.7995	18.5245
299	11.2666	17.1166	19.2833	22.0994	15.5996	22.7494	18.5245	25.0244	20.4745	18.1995
300	11.05	17.1166	19.2833	22.0994	15.5996	22.4244	18.1995	25.6744	21.1245	18.5245
301	11.7	17.1166	19.4999	21.7745	15.9246	23.0744	17.8746	25.0244	20.4745	18.5245
302	11.4833	17.3333	19.2833	22.0994	15.5996	23.0744	18.5245	25.3494	20.7995	18.5245
303	11.4833	17.1166	19.4999	22.0994	15.5996	23.0744	18.5245	25.6744	20.7995	18.8495
304	11.4833	17.1166	19.7166	22.0994	15.9246	23.3994	18.5245	25.6744	20.7995	18.8495
305	11.2666	17.3333	19.7166	22.0994	15.9246	23.0744	18.1995	25.6744	21.1245	18.8495
306	11.7	17.1166	19.4999	21.7745	15.5996	23.3994	18.5245	25.3494	20.7995	18.8495
307	11.4833	17.1166	19.2833	22.0994	15.5996	22.7494	18.1995	25.6744	20.7995	18.8495
308	11.4833	17.1166	19.4999	22.0994	15.9246	23.3994	18.8495	25.3494	20.7995	18.8495
309	11.4833	17.5499	19.4999	21.7745	15.9246	23.3994	18.5245	25.0244	20.7995	18.8495
310	11.4833	17.1166	19.2833	22.0994	15.9246	23.0744	18.1995	25.6744	20.1495	18.8495
311	11.2666	17.1166	19.2833	21.7745	16.2496	23.3994	18.5245	25.9994	20.7995	18.8495
312	11.4833	17.1166	19.4999	22.0994	15.9246	23.0744	18.5245	25.3494	20.7995	18.5245
313	11.2666	17.3333	19.4999	22.0994	15.5996	22.7494	18.5245	25.6744	20.7995	18.5245
314	11.4833	17.1166	19.2833	22.0994	15.9246	22.7494	18.8495	25.6744	21.4495	18.8495
315	11.7	17.1166	19.4999	21.7745	15.5996	22.7494	18.5245	25.6744	20.7995	18.5245
316	11.7	17.1166	19.2833	22.0994	16.2496	22.4244	18.1995	25.9994	20.4745	18.8495
317	11.7	17.1166	19.4999	22.0994	15.9246	22.4244	18.5245	25.6744	21.1245	18.5245
318	11.4833	17.3333	19.4999	22.0994	15.5996	22.4244	18.5245	25.6744	20.7995	18.5245
319	11.4833	17.1166	19.4999	21.7745	16.2496	22.7494	18.5245	25.3494	20.4745	18.8495
320	11.9166	17.3333	19.4999	21.7745	15.9246	22.4244	18.5245	25.3494	20.4745	18.5245
321	11.7	17.1166	19.7166	22.0994	16.2496	22.4244	18.8495	25.9994	20.1495	19.1745
322	11.9166	17.1166	19.7166	21.7745	16.2496	22.0994	18.5245	25.9994	20.1495	18.5245
323	11.7	17.1166	19.4999	22.0994	16.2496	22.4244	18.1995	25.6744	20.7995	19.1745
324	11.7	17.1166	19.4999	22.0994	15.9246	22.0994	18.5245	25.6744	20.7995	19.1745
325	11.4833	17.1166	19.7166	22.0994	15.9246	22.4244	18.8495	25.6744	20.7995	18.5245
326	11.7	17.1166	19.7166	22.0994	16.2496	22.0994	18.8495	25.6744	20.1495	19.1745
327	11.4833	17.1166	19.7166	22.0994	15.9246	22.0994	18.5245	25.3494	19.8245	19.1745
328	11.4833	17.1166	19.4999	22.0994	15.9246	22.7494	18.5245	25.6744	20.1495	18.8495
329	11.4833	17.3333	19.7166	22.0994	15.9246	22.4244	18.5245	25.6744	20.1495	19.1745
330	11.7	17.1166	19.4999	22.0994	15.9246	22.7494	18.1995	25.9994	19.8245	19.1745
331	11.7	17.1166	19.7166	22.0994	15.5996	22.4244	18.5245	25.9994	19.8245	18.8495
332	11.7	17.1166	19.7166	22.0994	15.5996	22.0994	18.5245	25.6744	19.4995	18.8495
333	11.4833	17.1166	19.7166	22.0994	16.2496	22.7494	18.8495	25.9994	19.8245	18.8495
334	11.4833	17.1166	19.7166	22.0994	15.5996	22.4244	17.8746	25.6744	19.8245	19.1745
335	11.7	17.1166	19.7166	22.0994	16.2496	22.0994	18.1995	25.3494	20.4745	18.8495
336	11.7	17.1166	19.7166	22.0994	15.9246	22.7494	18.1995	25.9994	20.1495	18.8495
337	11.4833	17.1166	19.7166	22.0994	15.5996	22.4244	18.5245	25.6744	19.8245	18.8495
338	11.7	17.1166	19.7166	22.0994	16.2496	22.7494	18.1995	25.6744	19.8245	18.8495
339	11.7	17.3333	19.7166	22.0994	15.2746	22.7494	18.1995	25.6744	20.1495	18.8495
340	11.7	17.1166	19.7166	22.0994	15.5996	22.7494	18.5245	25.6744	19.4995	18.5245
341	11.4833	17.1166	19.4999	22.0994	16.2496	22.4244	18.5245	25.3494	19.4995	19.1745
342	11.4833	17.1166	19.9333	22.0994	15.9246	22.7494	18.5245	25.9994	19.8245	18.8495
343	11.4833	17.1166	19.7166	22.0994	16.2496	22.4244	18.5245	25.9994	19.4995	19.1745
344	11.4833	17.3333	19.7166	22.0994	15.5996	22.4244	18.5245	25.6744	20.1495	18.8495
345	11.4833	17.1166	19.7166	22.0994	15.5996	23.0744	18.1995	25.6744	20.4745	18.8495
346	11.4833	16.8999	19.7166	22.0994	15.9246	22.7494	18.5245	25.6744	20.1495	18.8495
347	11.4833	17.1166	19.7166	22.0994	16.2496	22.7494	18.8495	25.9994	20.1495	18.8495
348	11.2666	17.5499	19.9333	22.0994	16.2496	22.7494	18.5245	26.3243	19.8245	19.1745
349	11.2666	17.1166	20.1499	22.0994	15.9246	22.7494	18.5245	25.9994	19.4995	19.1745
350	11.7	17.1166	19.7166	21.7745	15.9246	22.4244	18.5245	25.9994	19.8245	19.1745
351	11.4833	17.1166	19.9333	22.0994	15.9246	22.7494	18.5245	26.3243	19.4995	18.8495
352	11.7	16.8999	19.9333	22.0994	15.5996	22.4244	18.8495	25.9994	19.1745	19.1745
353	11.2666	16.8999	19.9333	22.0994	15.5996	22.4244	18.5245	25.9994	19.4995	19.1745
354	11.4833	16.8999	19.9333	22.0994	15.9246	22.7494	18.5245	25.6744	19.4995	18.8495
355	11.4833	16.8999	19.4999	22.0994	15.5996	22.0994	18.8495	25.6744	19.8245	18.8495
356	11.9166	17.1166	19.7166	22.0994	15.5996	22.7494	18.1995	25.6744	19.4995	18.8495
357	11.4833	17.1166	19.9333	22.0994	15.2746	22.7494	18.5245	25.6744	19.8245	18.8495
358	11.2666	17.3333	19.9333	22.0994	15.9246	22.7494	18.5245	25.9994	19.8245	18.8495
359	11.4833	17.1166	19.9333	22.0994	15.5996	22.7494	18.5245	25.6744	19.8245	19.1745
360	11.2666	17.1166	19.7166	22.0994	15.5996	23.0744	18.5245	25.9994	19.8245	19.1745
361	11.7	16.8999	19.9333	22.0994	15.5996	22.4244	18.5245	26.3243	19.4995	19.1745
362	11.2666	17.1166	19.7166	22.0994	15.9246	23.0744	18.8495	25.3494	19.8245	19.4995
363	11.4833	17.1166	19.7166	21.7745	15.9246	23.0744	18.5245	25.6744	19.4995	19.4995
364	11.4833	17.1166	19.9333	22.0994	15.5996	22.7494	18.5245	25.6744	19.4995	19.4995
365	11.4833	17.1166	19.7166	22.0994	15.9246	22.4244	18.5245	25.9994	18.8495	19.1745
366	11.4833	16.8999	19.7166	22.0994	15.9246	22.7494	18.8495	25.6744	19.4995	19.1745
367	11.4833	17.1166	19.7166	22.0994	15.9246	22.4244	18.1995	25.3494	19.4995	19.4995
368	11.2666	17.1166	20.3666	22.0994	15.9246	22.4244	18.8495	25.9994	18.8495	19.1745
369	11.4833	17.1166	20.1499	22.0994	15.5996	22.7494	18.8495	25.6744	19.1745	19.4995
370	11.4833	17.1166	20.1499	22.0994	15.2746	22.7494	18.8495	25.9994	19.4995	19.1745
371	11.2666	16.8999	20.3666	22.4244	15.5996	22.7494	19.1745	26.3243	19.4995	19.1745
372	11.4833	17.1166	20.1499	22.4244	15.5996	22.0994	18.8495	25.9994	19.4995	19.4995
373	11.2666	17.1166	20.3666	22.0994	15.9246	22.4244	18.5245	26.3243	19.4995	19.4995
374	11.2666	17.1166	20.3666	22.0994	15.5996	22.0994	18.8495	26.3243	19.4995	19.4995
375	11.05	16.6833	20.3666	22.4244	16.2496	22.4244	19.1745	26.3243	19.1745	19.4995
376	11.4833	17.1166	20.1499	22.0994	15.5996	22.4244	18.8495	25.9994	18.8495	19.4995
377	11.2666	17.1166	20.3666	22.0994	15.2746	22.4244	18.5245	26.3243	19.1745	19.1745
378	11.2666	17.1166	20.5833	21.7745	15.9246	22.4244	18.8495	25.6744	19.4995	19.1745
379	11.2666	16.8999	20.3666	22.0994	15.9246	22.7494	18.5245	26.3243	19.1745	19.1745
380	11.2666	17.3333	20.1499	22.0994	15.5996	22.4244	18.8495	26.3243	19.1745	18.8495
381	11.2666	16.8999	20.3666	22.0994	15.5996	22.4244	18.5245	25.9994	19.1745	18.8495
382	11.4833	17.1166	20.3666	22.0994	15.5996	22.4244	18.8495	26.3243	19.4995	19.1745
383	11.2666	17.1166	20.3666	22.0994	15.9246	22.4244	18.5245	26.6493	18.8495	19.1745
384	11.2666	16.8999	20.3666	22.0994	15.5996	22.0994	18.8495	26.3243	19.1745	19.1745
385	11.2666	16.8999	20.3666	22.4244	15.5996	22.4244	18.8495	25.6744	18.8495	19.1745
386	11.4833	17.1166	20.1499	22.4244	14.9496	22.4244	18.5245	25.6744	19.8245	19.1745
387	11.2666	17.1166	20.3666	22.0994	16.2496	22.4244	18.5245	25.9994	19.1745	19.1745
388	11.2666	17.3333	20.3666	22.0994	16.2496	22.0994	18.8495	25.6744	19.4995	18.8495
389	11.4833	17.5499	20.1499	22.4244	16.2496	22.4244	18.1995	25.9994	19.1745	19.1745
390	11.2666	16.8999	20.1499	21.7745	15.5996	22.4244	18.8495	26.3243	19.8245	19.4995
391	11.2666	17.3333	20.3666	22.4244	16.2496	22.4244	18.8495	26.3243	19.4995	19.4995
392	11.7	17.1166	20.3666	22.0994	16.2496	22.4244	18.8495	26.3243	19.1745	19.4995
393	11.2666	17.1166	20.5833	22.4244	16.5746	22.4244	18.8495	25.9994	19.1745	19.4995
394	11.2666	17.3333	20.3666	22.4244	16.8996	22.4244	19.1745	26.3243	19.8245	19.4995
395	11.2666	17.1166	20.1499	22.4244	16.2496	22.4244	18.5245	26.3243	19.1745	19.4995
396	11.4833	17.1166	20.3666	22.0994	16.2496	22.4244	19.1745	26.6493	19.4995	19.4995
397	11.4833	16.8999	20.1499	22.0994	16.5746	22.4244	18.8495	25.9994	20.1495	19.4995
398	11.4833	16.8999	20.3666	22.4244	16.5746	22.4244	19.1745	25.9994	19.4995	19.4995
399	11.4833	16.8999	20.3666	22.4244	16.2496	22.4244	19.1745	25.6744	19.4995	19.1745
400	11.05	16.8999	20.5833	22.0994	16.5746	22.0994	19.1745	25.3494	19.4995	19.4995
401	11.2666	16.8999	20.5833	22.4244	16.5746	22.0994	18.8495	25.9994	19.1745	19.4995
402	11.4833	17.1166	20.3666	22.0994	16.5746	22.4244	18.8495	26.3243	19.1745	18.8495
403	11.2666	17.1166	20.5833	22.0994	16.5746	22.0994	18.8495	25.6744	18.8495	18.8495
404	11.4833	17.1166	20.3666	22.0994	16.2496	22.4244	18.1995	26.3243	19.1745	18.8495
405	11.05	17.1166	20.3666	22.0994	16.2496	22.4244	18.5245	26.3243	19.4995	18.8495
406	11.4833	16.8999	20.3666	22.0994	16.2496	22.4244	18.8495	26.3243	19.1745	18.8495
407	11.4833	17.1166	20.3666	22.4244	15.9246	22.0994	18.5245	25.9994	19.1745	19.1745
408	11.05	17.1166	20.3666	22.0994	15.2746	22.0994	19.1745	25.9994	19.1745	19.1745
409	11.2666	17.1166	20.3666	22.0994	15.5996	22.0994	19.1745	26.9743	19.8245	19.1745
410	11.4833	17.1166	20.5833	22.0994	16.2496	22.0994	18.5245	25.9994	19.8245	19.1745
411	11.4833	16.8999	20.3666	22.0994	15.9246	22.4244	18.8495	26.3243	19.1745	19.1745
412	11.2666	16.8999	20.3666	22.0994	15.9246	22.0994	18.8495	25.6744	19.4995	19.1745
413	11.2666	17.1166	20.3666	22.0994	15.9246	22.0994	18.5245	25.6744	19.4995	19.4995
414	11.2666	17.1166	20.5833	22.0994	16.2496	22.0994	19.1745	25.9994	19.1745	19.4995
415	11.2666	16.8999	20.5833	22.4244	16.2496	22.4244	18.8495	26.3243	19.1745	19.4995
416	11.4833	17.3333	20.5833	22.4244	15.9246	22.0994	18.8495	26.3243	19.4995	19.4995
417	11.7	17.1166	20.3666	22.4244	16.8996	22.4244	18.8495	25.9994	19.4995	19.1745
418	11.2666	16.8999	20.5833	22.4244	16.5746	22.0994	19.1745	26.6493	18.8495	19.1745
419	11.4833	16.8999	20.5833	22.0994	16.5746	22.0994	18.8495	25.9994	19.1745	18.8495
420	11.05	16.8999	20.5833	22.0994	16.5746	22.4244	18.1995	25.9994	18.8495	19.4995
421	11.4833	17.1166	20.5833	22.0994	16.5746	22.4244	19.1745	25.9994	18.8495	18.8495
422	11.2666	17.1166	20.3666	22.4244	16.2496	22.4244	18.8495	26.3243	19.4995	19.1745
423	11.05	17.1166	20.7999	22.0994	16.2496	22.0994	18.5245	26.3243	19.1745	18.8495
424	11.4833	17.1166	20.3666	22.0994	16.5746	22.4244	19.1745	26.6493	19.4995	18.8495
425	11.4833	17.1166	20.5833	21.7745	16.2496	22.0994	19.1745	26.3243	18.8495	18.8495
426	11.4833	16.8999	20.5833	22.0994	16.2496	22.0994	18.8495	25.9994	19.1745	19.1745
427	11.2666	16.8999	20.3666	22.0994	16.5746	22.0994	19.1745	27.2993	19.4995	18.8495
428	11.4833	17.1166	20.5833	22.4244	15.9246	22.0994	18.5245	26.9743	19.1745	19.1745
429	11.2666	16.8999	20.3666	22.4244	16.5746	21.7745	18.8495	26.3243	19.1745	18.8495
430	11.2666	17.3333	20.5833	22.4244	16.8996	22.0994	18.8495	26.3243	19.1745	18.8495
431	11.2666	17.1166	20.3666	22.0994	16.8996	22.4244	18.5245	26.3243	19.1745	18.8495
432	11.2666	17.1166	20.5833	22.0994	16.5746	22.0994	19.1745	25.9994	19.1745	18.8495
433	11.2666	16.8999	20.3666	22.0994	16.5746	22.0994	19.1745	26.3243	19.1745	18.8495
434	11.4833	16.6833	20.5833	22.0994	16.8996	22.4244	19.1745	26.3243	19.1745	18.8495
435	11.4833	16.8999	20.3666	22.0994	16.5746	22.0994	18.8495	26.3243	19.1745	18.8495
436	11.2666	17.1166	20.3666	22.4244	16.8996	22.4244	19.1745	25.9994	18.5245	18.5245
437	11.2666	17.1166	20.3666	22.4244	16.5746	22.4244	19.1745	26.9743	18.8495	18.5245
438	11.2666	17.1166	20.1499	22.4244	16.5746	22.4244	18.5245	26.9743	18.8495	18.5245
439	11.4833	17.1166	20.5833	22.0994	16.5746	22.4244	18.8495	25.9994	19.4995	18.5245
440	11.4833	17.3333	20.5833	22.4244	16.2496	22.4244	19.1745	26.6493	18.8495	18.8495
441	11.2666	17.1166	20.5833	22.0994	16.2496	21.7745	18.8495	25.9994	19.1745	18.5245
442	11.4833	17.1166	20.1499	22.4244	16.2496	22.4244	18.8495	25.6744	19.4995	18.8495
443	11.4833	17.1166	20.1499	22.0994	15.9246	22.0994	19.1745	26.3243	19.4995	18.8495
444	11.2666	17.1166	20.5833	22.4244	16.2496	22.0994	19.1745	25.9994	19.1745	18.8495
445	11.2666	17.1166	20.3666	22.0994	16.2496	22.4244	19.1745	25.9994	18.8495	19.1745
446	11.4833	17.1166	20.3666	22.4244	16.2496	22.4244	18.8495	26.3243	18.8495	18.8495
447	11.2666	16.8999	20.1499	22.0994	16.2496	22.0994	18.8495	25.9994	19.1745	18.8495
448	11.05	17.1166	20.3666	22.4244	15.9246	22.0994	19.1745	25.9994	19.1745	18.8495
449	11.2666	16.8999	20.3666	22.4244	16.2496	22.0994	19.4995	25.9994	19.8245	18.8495
450	11.05	16.8999	20.3666	22.7494	16.2496	21.7745	18.8495	26.6493	19.1745	18.8495
451	11.05	17.1166	20.5833	22.4244	15.9246	22.0994	18.8495	25.9994	19.1745	18.5245
452	11.2666	16.8999	20.3666	22.4244	16.2496	22.0994	19.1745	25.9994	19.8245	18.5245
453	11.2666	17.1166	20.1499	22.4244	16.2496	22.0994	19.1745	26.3243	19.1745	18.5245
454	11.2666	16.8999	20.1499	22.4244	16.2496	22.4244	19.1745	26.3243	19.4995	18.8495
455	11.7	16.6833	20.1499	22.4244	16.8996	22.4244	19.1745	26.6493	19.4995	18.8495
456	11.4833	16.6833	20.1499	22.4244	16.2496	22.4244	19.1745	26.3243	19.1745	18.8495
457	11.2666	17.3333	20.1499	22.4244	16.2496	22.4244	18.8495	25.9994	19.1745	18.8495
458	10.8333	16.8999	20.3666	22.7494	16.2496	21.7745	19.1745	26.6493	19.8245	18.5245
459	11.2666	17.1166	20.3666	22.4244	16.2496	22.0994	19.1745	25.6744	19.1745	18.8495
460	11.2666	16.8999	20.5833	22.4244	15.9246	21.7745	18.8495	26.9743	19.8245	18.8495
461	11.4833	17.1166	20.3666	22.4244	16.2496	22.4244	19.1745	26.6493	19.1745	19.1745
462	11.2666	16.8999	20.1499	22.7494	15.9246	21.7745	18.8495	26.6493	19.1745	18.8495
463	11.4833	16.8999	20.3666	22.4244	16.2496	22.4244	18.8495	26.6493	19.1745	19.1745
464	11.4833	17.1166	20.1499	22.4244	16.2496	22.0994	19.1745	26.9743	19.4995	18.8495
465	11.2666	16.8999	20.5833	22.4244	16.2496	22.4244	18.8495	25.6744	19.1745	18.8495
466	11.05	17.1166	20.3666	22.4244	16.2496	22.0994	19.1745	26.6493	19.8245	18.8495
467	11.4833	17.1166	20.5833	22.4244	16.2496	21.7745	19.1745	26.9743	19.8245	18.8495
468	11.05	16.8999	20.5833	22.4244	16.5746	22.0994	18.8495	25.9994	19.8245	19.1745
469	11.4833	17.1166	20.5833	22.4244	16.5746	22.0994	19.1745	26.9743	18.8495	18.8495
470	11.2666	16.6833	20.5833	22.4244	16.2496	22.4244	18.8495	26.6493	19.1745	19.4995
471	11.2666	16.8999	20.3666	22.4244	16.2496	22.4244	19.1745	26.9743	19.1745	19.4995
472	11.4833	17.1166	20.5833	22.0994	16.2496	22.0994	19.1745	26.6493	19.1745	19.1745
473	11.4833	16.6833	20.5833	22.4244	16.2496	21.7745	19.1745	25.9994	19.4995	18.8495
474	11.4833	16.8999	20.5833	22.4244	16.2496	22.4244	18.8495	26.3243	19.1745	19.1745
475	11.2666	16.6833	20.1499	22.4244	16.2496	22.4244	19.8245	26.3243	19.1745	19.1745
476	11.4833	17.1166	20.3666	22.0994	16.2496	22.4244	19.1745	26.6493	19.1745	18.8495
477	11.4833	17.1166	20.5833	22.4244	16.5746	22.0994	18.8495	26.3243	18.8495	18.8495
478	11.05	16.6833	20.5833	22.4244	16.5746	21.7745	18.8495	25.9994	20.1495	19.1745
479	11.4833	16.6833	20.3666	22.4244	16.2496	22.4244	18.8495	26.9743	18.8495	18.8495
480	11.2666	17.1166	20.3666	22.7494	16.5746	22.0994	18.8495	26.6493	19.1745	18.8495
481	10.8333	16.8999	20.3666	22.4244	16.8996	22.0994	19.4995	25.6744	19.1745	18.8495
482	11.05	16.6833	20.3666	22.4244	16.5746	22.0994	19.1745	26.9743	19.4995	18.8495
483	11.2666	17.1166	20.3666	22.4244	16.5746	22.4244	19.1745	26.9743	19.4995	18.5245
484	11.4833	16.8999	20.1499	22.7494	16.8996	22.0994	19.1745	27.2993	18.8495	18.8495
485	10.8333	16.8999	20.3666	22.4244	16.5746	22.4244	19.8245	26.3243	18.5245	18.8495
486	11.2666	16.6833	20.3666	22.4244	16.5746	22.0994	19.4995	25.9994	19.4995	18.8495
487	11.2666	17.1166	20.5833	22.4244	16.5746	22.4244	18.5245	26.9743	19.4995	18.8495
488	11.4833	16.8999	20.1499	22.4244	16.5746	22.0994	19.1745	26.9743	19.4995	18.8495
489	11.4833	16.8999	20.3666	22.4244	16.5746	22.0994	18.8495	27.2993	18.8495	18.8495
490	11.4833	16.8999	20.3666	22.4244	16.8996	22.4244	18.8495	26.9743	19.1745	18.8495
491	11.2666	16.6833	20.1499	22.7494	16.8996	22.0994	18.8495	26.3243	20.4745	19.1745
492	11.4833	16.8999	20.3666	22.4244	16.8996	22.0994	19.1745	26.9743	18.8495	19.1745
493	11.4833	16.6833	20.3666	22.0994	16.5746	22.0994	19.1745	26.9743	18.8495	18.5245
494	11.2666	16.8999	20.3666	22.4244	16.5746	22.0994	19.1745	27.2993	19.1745	18.5245
495	11.2666	16.6833	20.3666	22.0994	16.8996	22.4244	19.1745	26.6493	19.1745	18.8495
496	11.4833	16.6833	20.3666	22.4244	16.5746	22.4244	19.1745	26.9743	19.1745	18.8495
497	11.2666	16.8999	20.5833	22.0994	16.8996	22.0994	18.8495	26.9743	19.1745	18.8495
498	11.2666	16.6833	20.3666	22.4244	16.8996	22.4244	19.4995	26.6493	19.1745	18.5245
499	11.05	16.8999	20.3666	22.4244	16.8996	22.4244	19.1745	26.9743	18.8495	18.8495
500	11.2666	16.6833	20.1499	22.4244	16.5746	22.4244	19.1745	26.9743	19.1745	18.8495
501	11.4833	16.8999	20.3666	22.4244	16.5746	22.0994	19.1745	26.9743	18.8495	18.8495
502	10.8333	17.1166	20.3666	22.4244	16.2496	22.4244	19.1745	26.9743	19.4995	19.1745
503	11.05	17.1166	20.1499	22.4244	16.2496	22.0994	18.8495	26.6493	19.8245	19.1745
504	11.2666	16.6833	20.3666	22.4244	16.5746	22.4244	19.4995	26.9743	19.1745	18.5245
505	11.2666	16.6833	20.5833	22.4244	16.5746	22.7494	19.1745	26.6493	19.1745	19.1745
506	11.2666	17.1166	20.5833	22.4244	16.5746	22.4244	19.4995	26.9743	19.1745	18.8495
507	11.4833	16.8999	20.5833	22.4244	16.2496	22.4244	19.4995	26.6493	19.1745	18.8495
508	11.05	17.1166	20.1499	22.7494	16.5746	23.0744	19.4995	27.6243	19.4995	19.1745
509	11.05	17.1166	20.3666	22.7494	15.9246	21.7745	19.1745	26.9743	20.1495	19.1745
510	11.2666	16.8999	20.3666	22.4244	16.5746	22.0994	19.1745	27.2993	19.4995	18.8495
511	11.2666	17.1166	20.1499	22.7494	15.9246	23.0744	19.1745	27.6243	19.4995	18.8495
512	11.2666	17.1166	20.5833	22.4244	15.9246	22.0994	18.8495	26.9743	18.5245	18.8495
513	11.05	16.8999	20.3666	22.4244	15.9246	22.7494	19.4995	25.9994	18.8495	19.1745
514	11.2666	17.1166	20.5833	22.7494	15.5996	22.7494	19.1745	26.9743	18.5245	19.1745
515	11.05	16.8999	20.1499	22.7494	16.2496	22.7494	19.4995	26.3243	18.8495	18.8495
516	11.2666	16.8999	20.3666	22.4244	15.5996	23.0744	19.1745	26.9743	19.1745	18.8495
517	11.05	17.1166	20.1499	22.7494	15.9246	23.0744	18.8495	26.9743	18.5245	18.8495
518	11.05	17.1166	20.5833	22.4244	16.2496	23.0744	19.8245	26.6493	18.8495	18.8495
519	11.4833	17.1166	20.3666	22.4244	15.9246	22.4244	19.4995	26.9743	19.1745	18.8495
520	11.05	17.3333	20.1499	22.7494	15.9246	22.7494	19.4995	26.9743	18.1995	18.8495
521	11.2666	17.1166	20.1499	22.4244	16.2496	23.0744	19.1745	26.3243	18.8495	18.8495
522	11.2666	17.1166	20.3666	22.7494	15.9246	22.7494	18.8495	27.2993	19.4995	18.8495
523	11.05	17.1166	20.3666	22.4244	15.9246	22.0994	19.4995	27.2993	18.8495	18.8495
524	11.05	16.8999	20.3666	22.4244	15.5996	22.7494	19.4995	26.6493	19.1745	18.8495
525	11.2666	17.3333	20.1499	22.4244	15.9246	22.7494	19.4995	25.9994	19.1745	18.8495
526	11.05	17.1166	20.1499	22.4244	16.2496	21.7745	19.4995	27.2993	18.5245	18.8495
527	11.2666	16.8999	20.5833	22.4244	15.9246	22.0994	19.1745	26.6493	18.5245	19.1745
528	11.05	17.1166	20.5833	22.4244	15.9246	22.7494	19.1745	26.9743	19.1745	18.8495
529	11.05	16.8999	20.5833	22.4244	15.9246	22.0994	19.4995	26.9743	18.1995	19.1745
530	10.8333	17.3333	20.5833	22.4244	16.5746	22.4244	19.1745	26.9743	19.1745	18.8495
531	11.2666	17.3333	20.5833	22.4244	16.2496	22.7494	19.1745	26.6493	18.8495	19.1745
532	11.05	17.3333	20.7999	22.4244	16.5746	22.7494	19.1745	27.6243	18.8495	18.8495
533	11.2666	17.5499	21.0166	22.4244	16.2496	22.0994	19.1745	26.6493	19.4995	18.8495
534	11.2666	17.3333	20.5833	22.4244	15.9246	22.4244	19.1745	26.9743	18.8495	19.4995
535	11.2666	17.1166	20.5833	22.4244	16.2496	22.4244	19.4995	26.6493	18.8495	18.8495
536	11.05	17.5499	20.7999	22.7494	16.2496	22.0994	19.4995	27.6243	18.8495	18.5245
537	11.2666	17.3333	20.5833	22.4244	16.5746	22.4244	19.1745	27.2993	19.1745	18.8495
538	11.2666	17.5499	20.7999	22.7494	16.5746	22.4244	19.1745	26.6493	18.8495	18.8495
539	11.2666	17.1166	20.7999	22.7494	16.2496	22.4244	18.8495	26.9743	18.8495	19.1745
540	11.05	17.3333	20.5833	22.7494	15.9246	21.7745	19.1745	27.2993	18.8495	18.5245
541	11.2666	17.1166	20.5833	22.7494	16.2496	22.0994	19.1745	27.6243	18.8495	18.8495
542	11.7	16.8999	20.7999	22.7494	16.2496	22.4244	19.1745	27.2993	19.1745	19.1745
543	11.05	17.3333	20.7999	22.7494	16.2496	21.7745	19.4995	27.2993	19.1745	19.1745
544	11.4833	17.1166	20.5833	22.7494	16.5746	22.0994	19.4995	27.2993	19.1745	18.8495
545	11.4833	17.1166	20.7999	22.7494	16.2496	21.7745	19.4995	26.9743	19.1745	18.8495
546	11.2666	16.8999	20.7999	22.7494	16.2496	22.4244	18.8495	26.9743	19.1745	19.1745
547	11.2666	17.5499	20.7999	22.7494	15.9246	21.7745	19.1745	27.2993	19.1745	18.8495
548	11.2666	16.8999	20.7999	22.7494	15.9246	22.0994	19.1745	27.2993	19.8245	19.1745
549	10.6166	17.5499	20.7999	22.7494	15.9246	21.7745	19.1745	26.9743	19.4995	18.8495
550	11.05	17.1166	20.7999	22.7494	16.2496	21.4495	19.4995	27.2993	19.8245	19.1745
551	11.05	17.1166	20.7999	22.7494	16.2496	21.1245	19.4995	27.2993	19.8245	19.1745
552	11.05	17.3333	20.7999	22.7494	15.9246	22.0994	19.4995	26.9743	19.1745	19.1745
553	11.4833	17.1166	20.7999	22.7494	15.9246	22.0994	19.8245	27.2993	19.1745	19.1745
554	11.05	17.7666	20.7999	22.7494	16.2496	22.0994	19.8245	27.6243	18.8495	19.1745
555	11.2666	17.1166	20.7999	22.7494	16.2496	22.0994	19.4995	26.9743	19.4995	18.8495
556	10.8333	17.3333	20.3666	22.7494	15.9246	22.0994	19.4995	27.2993	18.5245	19.1745
557	10.8333	16.8999	20.7999	22.7494	15.9246	22.0994	19.1745	26.6493	19.8245	18.8495
558	10.4	17.1166	20.5833	22.7494	16.2496	22.0994	19.4995	26.9743	19.1745	18.5245
559	10.8333	17.3333	20.7999	22.7494	15.9246	22.0994	20.1495	27.2993	19.4995	18.5245
560	11.2666	17.1166	20.5833	22.7494	16.2496	22.0994	19.4995	26.9743	19.8245	18.5245
561	10.6166	17.1166	20.7999	22.7494	15.9246	21.7745	19.1745	27.2993	19.4995	18.5245
562	10.8333	17.3333	20.7999	22.7494	15.9246	21.4495	19.8245	27.2993	19.1745	18.8495
563	10.8333	17.5499	20.7999	22.7494	15.9246	22.0994	19.4995	27.2993	19.1745	18.8495
564	10.8333	16.8999	20.7999	22.7494	15.9246	22.4244	20.1495	27.2993	19.1745	18.8495
565	11.05	16.8999	20.7999	22.7494	15.9246	22.0994	19.1745	27.6243	19.4995	18.5245
566	10.6166	17.7666	20.7999	22.7494	15.9246	22.0994	19.4995	27.6243	20.1495	18.5245
567	10.4	17.1166	20.7999	22.7494	15.9246	22.0994	19.4995	27.6243	19.1745	18.1995
568	10.8333	16.8999	20.7999	22.7494	16.2496	22.0994	19.1745	26.9743	19.4995	18.5245
569	11.05	16.8999	20.5833	22.7494	16.2496	21.7745	19.4995	25.9994	19.4995	18.5245
570	10.8333	17.1166	20.7999	22.7494	16.2496	22.0994	19.4995	26.6493	19.1745	18.5245
571	10.8333	16.8999	20.7999	22.7494	16.2496	22.0994	19.8245	26.9743	19.1745	18.8495
572	11.05	17.1166	20.7999	22.7494	16.2496	21.7745	19.1745	26.9743	19.1745	18.5245
573	11.05	16.8999	20.7999	22.7494	15.9246	22.4244	19.4995	26.6493	19.1745	18.1995
574	10.8333	17.5499	20.7999	22.7494	15.9246	22.0994	19.4995	27.2993	19.8245	19.1745
575	11.05	17.1166	20.7999	22.7494	16.2496	21.7745	19.1745	27.2993	19.8245	18.8495
576	11.05	16.8999	20.7999	23.0744	15.9246	22.0994	19.8245	26.3243	19.4995	18.8495
577	11.05	16.8999	20.7999	22.7494	16.2496	22.0994	19.4995	26.6493	19.8245	18.8495
578	11.2666	17.1166	21.0166	22.7494	16.5746	22.0994	19.4995	26.9743	19.8245	18.1995
579	10.6166	17.1166	20.7999	22.7494	16.5746	22.0994	19.1745	26.9743	19.4995	18.5245
580	10.8333	17.3333	21.0166	22.7494	16.5746	22.0994	19.8245	26.9743	19.1745	18.1995
581	11.05	17.1166	21.0166	22.7494	16.2496	22.0994	19.8245	26.9743	19.1745	18.5245
582	11.05	17.1166	20.7999	22.7494	16.5746	22.0994	19.4995	27.2993	19.1745	18.5245
583	11.05	17.1166	20.7999	22.7494	16.5746	21.7745	19.4995	27.2993	19.8245	19.1745
584	11.05	17.1166	20.7999	22.7494	16.2496	22.0994	19.4995	26.6493	19.4995	18.8495
585	10.6166	16.8999	20.7999	22.7494	16.5746	21.7745	19.8245	26.9743	19.4995	18.8495
586	11.05	17.3333	20.5833	22.7494	15.9246	22.0994	19.4995	27.2993	19.4995	18.8495
587	10.8333	17.1166	20.7999	22.7494	15.9246	22.4244	19.8245	27.2993	19.8245	18.5245
588	10.8333	16.8999	21.0166	22.7494	15.9246	22.4244	19.4995	27.2993	19.8245	18.8495
589	11.05	17.1166	20.5833	22.7494	15.9246	22.0994	19.4995	27.2993	19.4995	18.8495
590	10.8333	17.1166	20.7999	22.7494	15.9246	22.4244	19.4995	27.9493	19.4995	18.1995
591	11.2666	16.8999	21.0166	22.7494	15.9246	22.4244	19.1745	26.9743	19.4995	18.5245
592	11.2666	17.1166	21.0166	22.7494	16.2496	22.0994	19.4995	27.6243	19.4995	18.8495
593	11.05	17.1166	21.4499	22.7494	16.2496	22.4244	19.8245	26.6493	19.8245	18.5245
594	11.2666	16.8999	20.7999	22.7494	16.2496	21.7745	19.4995	27.6243	19.1745	18.1995
595	10.8333	16.8999	21.2333	22.7494	16.2496	22.0994	19.4995	27.6243	19.4995	18.5245
596	11.2666	17.1166	20.7999	22.7494	16.2496	21.7745	19.1745	26.6493	18.8495	18.8495
597	11.4833	16.8999	21.0166	22.7494	16.2496	22.4244	19.1745	26.9743	19.4995	18.5245
598	11.05	16.8999	21.0166	22.7494	15.9246	22.4244	19.4995	27.9493	19.8245	18.8495
599	11.2666	17.1166	21.0166	22.7494	16.2496	21.4495	19.8245	26.9743	19.8245	18.5245
600	11.05	17.1166	20.7999	23.0744	15.9246	21.7745	18.8495	27.2993	19.4995	18.1995
601	11.05	17.1166	20.7999	22.7494	16.2496	22.0994	19.1745	27.2993	19.4995	18.8495
602	10.8333	17.1166	21.2333	22.7494	16.2496	21.7745	19.8245	27.6243	19.4995	18.5245
603	11.05	16.8999	21.2333	22.7494	15.9246	22.0994	19.4995	27.2993	19.1745	18.8495
604	11.05	17.1166	20.7999	22.7494	16.2496	22.0994	19.4995	27.2993	19.8245	18.5245
605	11.05	17.1166	20.7999	22.7494	16.2496	22.4244	19.8245	27.2993	19.8245	18.5245
606	11.05	16.8999	21.4499	22.7494	15.9246	22.4244	19.4995	26.9743	19.1745	18.5245
607	10.6166	16.8999	21.0166	22.7494	16.2496	22.7494	19.4995	26.9743	19.4995	18.5245
608	11.05	16.8999	21.4499	22.7494	16.2496	22.4244	19.8245	26.6493	19.8245	18.5245
609	10.8333	17.1166	21.0166	22.7494	16.5746	22.0994	19.8245	27.2993	19.8245	18.5245
610	10.8333	17.1166	20.7999	22.7494	16.2496	22.4244	19.4995	27.2993	20.1495	18.5245
611	10.6166	16.8999	20.7999	22.7494	16.2496	21.7745	19.8245	26.6493	19.8245	18.5245
612	11.05	17.1166	21.2333	22.7494	16.8996	21.7745	19.1745	26.9743	19.4995	18.1995
613	11.2666	17.1166	21.0166	23.0744	16.5746	21.7745	19.4995	26.9743	19.4995	18.5245
614	10.6166	17.1166	21.0166	22.7494	16.5746	22.4244	19.8245	26.9743	19.4995	18.5245
615	11.05	16.8999	20.7999	22.7494	16.5746	22.4244	19.1745	27.6243	19.4995	18.5245
616	10.8333	17.1166	20.5833	22.7494	16.5746	22.4244	19.4995	27.2993	19.4995	19.1745
617	10.8333	17.3333	20.5833	23.0744	16.5746	22.0994	20.1495	26.9743	19.8245	18.8495
618	11.05	17.1166	21.0166	22.7494	16.2496	22.0994	19.1745	27.2993	19.8245	18.8495
619	10.6166	17.1166	21.0166	22.7494	16.5746	22.0994	19.4995	26.6493	19.4995	18.5245
620	11.05	17.1166	21.0166	22.7494	16.5746	21.7745	19.8245	26.9743	19.8245	18.5245
621	11.05	17.1166	20.7999	22.7494	16.8996	22.0994	19.4995	26.9743	19.4995	18.5245
622	10.8333	16.8999	20.7999	23.0744	15.9246	22.4244	19.1745	27.2993	19.8245	18.8495
623	10.4	17.1166	21.0166	22.7494	16.2496	22.4244	19.4995	27.6243	19.8245	18.1995
624	10.8333	17.1166	20.7999	22.7494	16.5746	22.0994	19.1745	26.9743	19.8245	18.5245
625	10.6166	17.1166	20.5833	22.7494	16.5746	22.0994	19.4995	26.6493	19.4995	18.5245
626	11.05	16.8999	20.7999	22.7494	16.5746	22.4244	19.8245	26.6493	19.1745	18.5245
627	10.6166	17.1166	20.5833	22.7494	16.2496	22.0994	19.4995	27.2993	19.1745	19.1745
628	11.05	16.8999	21.2333	22.7494	16.5746	22.0994	19.4995	27.2993	19.4995	18.5245
629	10.8333	16.8999	20.7999	23.0744	16.5746	22.4244	20.1495	27.6243	19.4995	18.5245
630	11.4833	16.8999	20.7999	22.7494	16.2496	22.7494	19.8245	27.6243	19.8245	19.1745
631	10.8333	17.1166	21.2333	22.7494	16.2496	22.4244	19.8245	27.6243	19.4995	18.8495
632	11.05	16.8999	21.2333	22.7494	16.2496	22.0994	19.4995	27.2993	19.1745	18.8495
633	11.05	16.8999	20.7999	23.0744	15.9246	22.0994	19.4995	27.2993	18.8495	19.4995
634	10.4	17.1166	20.7999	22.7494	16.2496	22.4244	19.4995	27.2993	19.8245	19.8245
635	10.8333	17.3333	20.5833	22.7494	15.9246	22.0994	19.4995	27.6243	19.4995	19.8245
636	10.6166	17.1166	21.2333	22.7494	15.9246	22.4244	19.4995	27.6243	20.1495	18.8495
637	11.05	16.8999	20.7999	22.7494	16.8996	22.0994	19.1745	26.9743	19.8245	19.1745
638	11.05	17.1166	21.0166	22.7494	16.2496	22.0994	19.4995	26.9743	19.1745	18.8495
639	10.8333	16.8999	20.7999	23.0744	16.2496	22.4244	19.8245	26.3243	19.1745	18.5245
640	11.05	17.1166	20.5833	22.7494	16.2496	22.0994	19.8245	26.6493	19.8245	18.8495
641	11.05	16.8999	20.7999	22.7494	16.2496	22.0994	19.1745	27.6243	19.4995	19.1745
642	10.8333	16.8999	20.5833	23.0744	16.2496	22.4244	19.8245	26.6493	19.1745	19.1745
643	10.8333	16.8999	20.7999	22.7494	15.9246	22.4244	20.1495	27.6243	19.1745	19.1745
644	11.05	16.8999	20.5833	22.7494	15.9246	22.4244	19.1745	26.9743	19.4995	18.8495
645	10.8333	16.8999	21.0166	23.0744	15.9246	22.4244	19.8245	27.6243	19.8245	19.1745
646	10.4	17.1166	20.5833	22.7494	15.9246	22.0994	19.8245	27.6243	19.8245	19.1745
647	11.05	17.1166	20.7999	22.7494	15.9246	22.4244	19.8245	26.9743	19.8245	19.1745
648	11.05	16.8999	20.5833	22.7494	15.5996	22.0994	19.8245	26.9743	19.4995	19.4995
649	11.05	16.8999	20.7999	23.0744	16.2496	22.0994	20.1495	26.9743	19.4995	19.1745
650	11.05	16.8999	21.0166	22.7494	16.2496	22.0994	19.4995	27.9493	19.4995	19.4995
651	11.05	17.1166	20.7999	23.0744	15.9246	22.0994	20.1495	27.6243	18.8495	19.4995
652	10.8333	17.1166	20.7999	23.0744	15.9246	21.7745	19.8245	27.2993	19.8245	19.1745
653	11.05	16.6833	21.2333	23.3994	15.9246	21.7745	19.4995	26.9743	19.1745	18.8495
654	10.6166	16.8999	21.0166	23.0744	15.9246	21.7745	19.4995	27.2993	19.4995	19.1745
655	11.05	16.4666	20.7999	22.7494	15.2746	22.7494	19.8245	27.2993	19.4995	18.5245
656	11.05	16.8999	20.7999	22.7494	15.9246	22.4244	19.8245	27.9493	19.8245	18.8495
657	10.8333	16.8999	20.5833	23.0744	15.9246	22.0994	19.4995	27.6243	19.4995	19.1745
658	10.8333	17.1166	20.5833	22.7494	15.9246	22.0994	19.8245	27.2993	19.8245	19.4995
659	10.8333	16.4666	20.7999	22.7494	15.9246	22.7494	19.4995	26.3243	19.4995	19.1745
660	11.05	16.4666	20.5833	22.7494	15.9246	22.0994	19.4995	26.9743	20.4745	19.4995
661	11.4833	16.6833	20.3666	23.0744	15.9246	22.4244	19.8245	27.9493	19.8245	19.1745
662	11.05	16.6833	20.7999	23.0744	16.2496	22.0994	19.1745	27.6243	19.8245	19.1745
663	10.8333	16.8999	20.7999	23.0744	16.2496	22.0994	19.8245	27.2993	19.8245	19.4995
664	10.8333	16.6833	20.5833	23.0744	15.9246	22.0994	20.1495	27.2993	19.4995	19.4995
665	11.05	16.6833	20.7999	23.0744	15.9246	22.0994	19.8245	27.6243	19.4995	19.1745
666	10.8333	16.8999	20.7999	22.7494	16.2496	22.0994	19.8245	27.2993	19.8245	19.1745
667	10.6166	16.6833	21.0166	22.7494	15.9246	22.0994	19.4995	27.6243	19.8245	19.8245
668	10.8333	16.6833	20.7999	22.7494	15.9246	22.0994	19.4995	27.6243	19.8245	19.4995
669	10.4	16.8999	20.7999	22.7494	15.9246	22.0994	19.1745	27.2993	19.4995	18.8495
670	10.8333	17.1166	20.5833	23.0744	15.9246	21.7745	19.8245	27.6243	19.1745	19.8245
671	10.6166	16.8999	20.5833	23.0744	15.5996	22.0994	19.4995	27.9493	19.1745	19.4995
672	11.05	16.6833	20.5833	23.0744	15.9246	22.0994	19.4995	27.9493	19.8245	19.4995
673	10.6166	16.6833	20.5833	23.0744	15.9246	22.0994	20.1495	27.6243	19.8245	19.4995
674	10.8333	16.8999	20.5833	23.0744	15.9246	22.0994	19.8245	27.2993	19.8245	19.1745
675	11.05	16.6833	20.5833	22.7494	15.5996	22.0994	19.4995	27.9493	19.4995	19.1745
676	10.8333	16.8999	20.5833	23.0744	15.5996	22.0994	19.4995	26.6493	20.4745	19.4995
677	10.6166	16.8999	21.0166	22.7494	15.9246	22.4244	19.8245	26.9743	20.4745	19.1745
678	11.05	16.8999	20.5833	23.0744	15.5996	22.0994	20.1495	28.2743	19.4995	19.1745
679	10.8333	16.8999	20.5833	23.0744	16.2496	22.0994	19.4995	27.2993	19.8245	19.1745
680	11.05	16.6833	20.3666	22.7494	16.2496	22.4244	19.4995	27.2993	19.4995	19.1745
681	11.05	16.6833	21.0166	23.0744	15.5996	22.4244	19.4995	26.3243	19.8245	19.8245
682	10.8333	16.6833	20.7999	23.0744	16.2496	22.0994	19.8245	26.9743	19.8245	19.4995
683	10.8333	16.6833	20.7999	23.0744	15.5996	22.0994	19.8245	27.6243	19.8245	19.4995
684	11.05	16.6833	20.7999	23.0744	15.9246	22.4244	19.4995	27.6243	19.4995	19.1745
685	10.8333	16.6833	21.0166	23.0744	16.2496	22.4244	19.8245	27.9493	19.4995	19.4995
686	11.05	16.8999	20.7999	22.7494	15.5996	22.4244	19.8245	27.9493	19.8245	18.8495
687	10.8333	16.6833	20.7999	22.7494	15.5996	22.0994	20.1495	27.2993	19.4995	19.1745
688	11.05	16.6833	20.7999	23.0744	15.9246	22.0994	19.4995	27.2993	19.8245	18.8495
689	11.2666	16.8999	20.7999	23.0744	15.9246	22.4244	19.8245	27.2993	19.8245	19.1745
690	10.6166	16.2499	20.7999	23.0744	15.5996	22.0994	20.1495	27.2993	19.4995	19.1745
691	10.8333	16.6833	20.7999	23.0744	15.9246	21.7745	19.8245	27.9493	19.4995	19.1745
692	10.8333	16.6833	20.5833	23.0744	16.2496	22.4244	19.4995	27.6243	19.4995	19.4995
693	11.2666	17.1166	20.7999	23.0744	15.9246	22.0994	19.1745	27.6243	19.8245	19.4995
694	10.8333	16.6833	20.7999	22.7494	15.5996	22.0994	19.8245	26.6493	20.1495	19.1745
695	10.8333	16.8999	20.7999	23.0744	15.5996	22.0994	19.8245	26.9743	19.4995	19.1745
696	10.6166	16.6833	20.7999	22.7494	15.2746	22.0994	20.1495	27.2993	19.4995	18.8495
697	10.8333	16.6833	21.0166	23.0744	15.5996	22.0994	19.4995	27.2993	19.8245	19.1745
698	10.6166	16.8999	20.5833	23.0744	16.2496	22.0994	19.8245	27.6243	19.4995	19.1745
699	11.05	16.8999	21.0166	22.7494	14.9496	22.0994	19.4995	26.9743	19.4995	19.1745
700	11.05	16.8999	21.0166	23.0744	14.9496	22.0994	20.1495	27.2993	19.1745	19.1745
701	10.8333	16.8999	20.7999	22.7494	15.2746	22.0994	19.4995	27.6243	19.8245	19.1745
702	10.8333	16.8999	20.7999	23.0744	15.5996	22.0994	19.8245	27.6243	19.4995	18.8495
703	10.8333	16.8999	20.7999	23.0744	15.2746	22.4244	20.1495	27.6243	19.1745	19.1745
704	10.6166	16.8999	20.7999	22.7494	14.9496	22.0994	19.8245	27.6243	19.4995	19.1745
705	10.6166	16.8999	21.0166	23.0744	14.9496	22.0994	20.1495	27.6243	19.4995	19.1745
706	10.6166	17.1166	20.7999	23.0744	15.2746	22.0994	19.4995	27.6243	19.8245	19.1745
707	10.8333	16.8999	21.0166	23.0744	14.9496	22.4244	20.1495	27.2993	19.4995	19.1745
708	10.8333	16.6833	20.7999	23.0744	14.9496	22.4244	19.8245	27.6243	19.8245	19.4995
709	11.05	16.6833	20.7999	22.7494	16.2496	22.4244	19.8245	27.6243	19.8245	19.1745
710	10.6166	16.6833	21.0166	22.7494	15.2746	22.4244	19.8245	27.6243	19.8245	19.1745
711	11.05	16.6833	21.0166	23.0744	15.2746	22.7494	19.8245	27.6243	20.1495	19.1745
712	11.05	16.6833	21.0166	23.0744	15.5996	22.0994	19.8245	28.2743	20.1495	19.4995
713	11.2666	16.8999	21.0166	23.0744	15.9246	22.0994	20.1495	27.2993	19.4995	19.1745
714	10.8333	16.8999	20.7999	22.7494	15.5996	22.4244	19.8245	27.6243	19.8245	19.8245
715	11.05	17.3333	21.0166	23.0744	15.5996	21.7745	19.8245	27.9493	20.1495	19.4995
716	10.8333	16.8999	20.7999	22.7494	15.5996	22.0994	19.8245	27.2993	19.4995	19.4995
717	10.6166	16.8999	21.0166	22.7494	15.5996	22.4244	20.1495	27.2993	20.1495	19.4995
718	11.05	16.6833	21.0166	23.0744	15.9246	22.0994	20.1495	27.2993	19.4995	19.4995
719	10.8333	17.3333	20.7999	23.0744	15.9246	21.7745	19.8245	27.6243	20.1495	19.4995
720	11.05	16.8999	21.0166	22.7494	15.5996	22.4244	19.8245	27.6243	19.8245	19.4995
721	10.6166	16.8999	20.7999	23.0744	16.2496	22.0994	20.1495	27.2993	19.4995	19.4995
722	10.6166	16.6833	21.0166	22.7494	16.2496	22.4244	20.1495	27.6243	19.8245	19.4995
723	10.8333	16.6833	20.7999	23.0744	16.2496	22.0994	20.1495	27.9493	19.8245	19.4995
724	11.05	16.6833	21.0166	22.7494	15.9246	21.7745	19.8245	27.6243	19.4995	19.4995
725	10.8333	16.8999	21.0166	23.0744	15.9246	22.4244	19.8245	27.6243	19.8245	19.4995
726	11.05	17.1166	21.0166	22.7494	16.2496	22.0994	19.4995	27.9493	19.4995	19.4995
727	10.8333	16.8999	21.0166	23.0744	15.9246	22.0994	20.1495	27.9493	20.1495	19.4995
728	10.8333	16.6833	21.0166	22.7494	15.9246	22.0994	19.8245	27.6243	20.1495	19.1745
729	10.8333	16.6833	21.0166	23.0744	16.2496	22.0994	20.1495	27.2993	19.4995	19.1745
730	10.8333	16.8999	21.0166	23.0744	15.5996	22.0994	19.8245	27.9493	20.1495	19.1745
731	11.05	16.8999	21.0166	23.0744	15.5996	22.0994	19.8245	27.6243	20.1495	19.1745
732	10.6166	16.8999	21.0166	23.0744	15.9246	22.4244	20.1495	27.9493	19.4995	19.1745
733	10.4	16.4666	21.0166	23.0744	15.5996	22.0994	19.8245	27.6243	19.8245	19.1745
734	10.6166	16.4666	21.0166	22.7494	15.9246	22.7494	20.1495	27.2993	19.4995	19.4995
735	10.6166	16.4666	21.0166	23.0744	16.2496	22.0994	19.8245	27.9493	20.1495	19.4995
736	11.2666	16.6833	21.0166	22.7494	15.9246	22.4244	19.8245	27.6243	20.7995	19.4995
737	10.8333	16.8999	21.0166	23.0744	16.2496	22.4244	19.8245	27.6243	19.8245	19.4995
738	10.6166	16.6833	21.0166	22.7494	15.9246	22.0994	19.4995	27.2993	20.1495	19.1745
739	10.6166	16.6833	21.0166	23.0744	15.9246	21.7745	19.8245	27.9493	19.4995	19.4995
740	10.4	16.6833	21.0166	22.7494	15.9246	22.0994	20.1495	27.9493	20.1495	19.4995
741	10.8333	16.8999	21.0166	23.0744	16.2496	21.7745	20.1495	27.9493	19.4995	19.4995
742	10.6166	17.1166	21.0166	23.0744	15.9246	22.4244	20.4745	27.6243	19.8245	19.4995
743	10.8333	16.6833	21.0166	22.7494	15.9246	22.0994	19.8245	27.9493	20.1495	19.1745
744	10.8333	16.4666	21.2333	23.0744	15.5996	22.4244	19.8245	28.2743	20.1495	19.1745
745	10.8333	16.8999	21.0166	23.0744	15.9246	21.7745	19.8245	27.6243	19.4995	19.4995
746	10.6166	16.6833	21.0166	23.0744	15.9246	22.4244	19.8245	26.6493	19.4995	19.4995
747	10.6166	16.8999	21.0166	22.7494	16.2496	22.0994	19.8245	27.2993	19.8245	19.4995
748	11.05	16.8999	21.0166	22.7494	16.2496	22.7494	20.1495	27.2993	19.4995	19.4995
749	11.05	16.6833	21.4499	22.7494	16.2496	22.0994	19.8245	27.6243	19.8245	19.4995
750	10.4	16.6833	21.0166	22.7494	15.9246	22.0994	20.1495	26.6493	20.1495	19.4995
751	11.05	16.8999	21.0166	22.7494	15.9246	22.0994	19.8245	27.2993	20.1495	19.4995
752	11.05	16.6833	21.0166	22.7494	16.2496	21.7745	20.1495	27.2993	20.1495	19.4995
753	10.4	16.6833	21.2333	22.7494	16.2496	22.0994	20.1495	27.2993	20.1495	19.1745
754	10.8333	16.8999	21.0166	22.4244	15.9246	21.4495	19.8245	27.6243	20.1495	19.4995
755	10.8333	16.6833	21.0166	22.7494	16.2496	22.0994	19.4995	27.2993	20.1495	19.4995
756	10.6166	16.4666	21.0166	22.7494	15.9246	22.0994	20.1495	27.6243	19.8245	19.1745
757	11.05	16.2499	21.0166	22.7494	16.2496	21.7745	19.8245	27.6243	19.8245	19.8245
758	10.8333	16.4666	21.0166	22.7494	16.2496	22.0994	19.8245	27.2993	19.8245	19.4995
759	10.8333	16.6833	21.0166	22.7494	16.5746	22.0994	20.1495	27.2993	19.8245	19.4995
760	10.8333	16.6833	21.0166	22.7494	16.2496	21.7745	19.8245	27.6243	19.8245	19.4995
761	10.8333	16.8999	21.2333	22.4244	16.2496	22.4244	19.8245	27.2993	19.4995	19.1745
762	10.8333	16.4666	21.0166	22.4244	16.5746	22.0994	19.8245	27.6243	20.1495	19.4995
763	11.05	16.4666	21.2333	22.7494	16.2496	22.4244	20.1495	27.2993	19.4995	19.1745
764	10.6166	16.4666	21.0166	22.7494	15.9246	22.0994	19.8245	27.6243	19.4995	19.4995
765	11.05	16.6833	21.2333	22.7494	16.2496	21.7745	20.1495	27.6243	20.1495	19.8245
766	10.4	16.4666	21.0166	22.4244	15.9246	21.7745	19.8245	27.6243	20.1495	19.1745
767	10.8333	16.6833	21.0166	22.7494	15.9246	22.0994	20.1495	27.2993	19.8245	19.1745
768	10.6166	16.4666	21.0166	22.7494	15.5996	22.0994	19.8245	26.9743	20.1495	19.4995
769	11.05	16.4666	21.0166	22.7494	15.9246	22.0994	19.8245	27.2993	19.8245	19.4995
770	10.4	16.6833	21.0166	22.7494	16.2496	21.7745	20.1495	27.6243	20.1495	19.4995
771	10.6166	16.4666	21.2333	22.7494	15.9246	22.0994	19.8245	27.9493	19.8245	19.8245
772	10.6166	16.8999	21.0166	22.7494	16.2496	22.0994	19.8245	27.9493	19.8245	19.8245
773	10.4	16.6833	21.0166	22.4244	15.9246	22.0994	19.4995	27.9493	19.8245	19.4995
774	10.8333	16.6833	21.2333	22.7494	15.9246	22.0994	20.1495	27.2993	20.1495	19.4995
775	11.2666	16.4666	21.0166	22.4244	16.2496	22.0994	20.1495	27.2993	19.4995	19.4995
776	10.8333	16.4666	21.2333	22.4244	16.2496	22.0994	19.8245	27.6243	19.8245	19.4995
777	11.05	16.2499	21.0166	22.4244	16.2496	22.0994	19.4995	27.6243	19.4995	19.1745
778	11.05	16.8999	21.0166	22.7494	16.2496	22.0994	19.1745	26.9743	19.8245	19.4995
779	11.05	16.6833	21.0166	22.7494	16.2496	22.0994	19.1745	27.6243	19.4995	19.1745
780	10.8333	16.4666	21.0166	22.7494	15.9246	22.0994	19.1745	27.9493	19.8245	19.4995
781	10.6166	16.6833	21.0166	22.7494	16.2496	21.7745	19.1745	28.2743	19.8245	19.4995
782	11.05	16.4666	20.7999	22.7494	16.2496	21.7745	19.1745	27.6243	19.1745	19.4995
783	10.8333	16.4666	21.0166	22.7494	16.2496	22.0994	18.8495	27.2993	19.1745	19.1745
784	10.6166	16.8999	21.0166	22.4244	16.8996	22.0994	19.1745	27.6243	19.8245	19.4995
785	10.8333	17.1166	21.0166	22.7494	16.2496	21.7745	19.1745	27.9493	18.8495	19.1745
786	10.8333	16.8999	21.0166	22.7494	16.2496	22.4244	19.4995	27.2993	19.8245	19.1745
787	10.6166	16.6833	20.7999	22.7494	16.2496	22.0994	18.8495	27.6243	19.8245	19.1745
788	10.4	16.8999	21.0166	22.7494	16.5746	22.0994	19.4995	27.2993	19.8245	19.4995
789	10.6166	16.8999	21.0166	22.7494	16.5746	22.4244	19.8245	26.9743	19.8245	19.1745
790	10.4	16.6833	21.2333	22.4244	16.8996	22.0994	20.1495	27.2993	19.8245	19.4995
791	10.1833	16.4666	21.0166	22.4244	16.2496	22.4244	19.8245	26.9743	20.1495	19.4995
792	10.6166	16.4666	21.2333	22.4244	16.8996	22.0994	19.8245	27.2993	19.4995	19.4995
793	10.4	16.6833	21.0166	22.7494	16.8996	21.7745	19.8245	27.2993	19.8245	19.1745
794	10.6166	16.8999	21.0166	22.7494	16.8996	22.0994	20.4745	27.2993	19.1745	19.4995
795	10.6166	16.6833	21.0166	22.7494	16.5746	22.4244	20.1495	27.6243	19.8245	19.4995
796	11.05	16.4666	21.0166	22.4244	16.8996	21.7745	19.8245	27.2993	19.4995	19.4995
797	10.6166	16.6833	21.0166	22.7494	16.5746	21.7745	19.8245	26.9743	19.4995	19.4995
798	11.05	16.6833	21.2333	22.7494	16.5746	22.0994	20.7995	27.2993	19.4995	19.1745
799	10.6166	16.6833	21.0166	22.7494	16.2496	22.0994	20.1495	27.2993	19.4995	19.4995
800	10.6166	16.8999	21.0166	22.7494	16.5746	22.4244	20.7995	27.2993	19.8245	19.4995
801	10.4	16.4666	21.0166	22.4244	16.8996	22.0994	20.1495	27.6243	19.4995	19.4995
802	10.6166	16.6833	21.2333	22.4244	16.8996	22.4244	20.4745	27.6243	19.4995	19.4995
803	10.4	16.8999	21.0166	22.4244	16.8996	22.4244	20.1495	27.6243	19.8245	19.4995
804	10.6166	16.6833	21.2333	22.7494	16.5746	22.0994	20.4745	27.2993	19.8245	19.4995
805	10.8333	16.6833	21.0166	22.7494	16.5746	22.0994	19.8245	27.2993	19.4995	19.1745
806	10.6166	16.6833	21.2333	22.7494	16.8996	22.7494	20.4745	26.9743	19.1745	19.4995
807	10.4	16.6833	20.7999	22.7494	16.8996	22.0994	20.4745	27.2993	19.8245	19.1745
808	10.4	16.2499	20.7999	22.7494	16.8996	22.0994	20.1495	27.2993	20.1495	19.1745
809	10.6166	16.6833	20.7999	22.7494	16.8996	22.7494	20.1495	26.9743	19.8245	19.1745
810	10.6166	16.4666	20.7999	22.4244	16.8996	22.4244	20.4745	27.6243	19.8245	19.4995
811	10.6166	16.6833	21.0166	22.4244	16.8996	22.4244	20.1495	26.6493	19.8245	19.1745
812	10.4	16.4666	21.0166	22.4244	16.8996	22.4244	19.8245	26.9743	19.4995	18.8495
813	10.6166	16.4666	21.0166	22.4244	17.2246	22.4244	20.7995	26.9743	19.8245	18.8495
814	10.4	16.4666	21.2333	22.4244	16.2496	22.4244	19.8245	26.9743	19.4995	19.1745
815	10.6166	16.8999	21.2333	22.4244	16.8996	22.0994	19.8245	27.6243	19.4995	19.4995
816	10.1833	16.6833	21.0166	22.7494	16.8996	22.0994	20.1495	27.9493	19.4995	19.4995
817	10.1833	16.4666	21.0166	22.7494	16.8996	22.0994	20.1495	27.6243	20.1495	19.1745
818	10.4	16.6833	21.2333	22.4244	16.2496	22.4244	20.4745	27.2993	20.4745	19.1745
819	10.8333	16.4666	21.0166	22.4244	16.8996	22.4244	19.8245	27.2993	19.8245	19.1745
820	10.4	16.4666	21.0166	22.4244	16.5746	22.4244	20.1495	27.2993	19.4995	19.8245
821	9.74997	16.2499	21.0166	22.4244	16.8996	22.4244	20.4745	27.2993	19.4995	19.1745
822	10.4	16.4666	21.2333	22.4244	16.8996	22.4244	20.4745	27.2993	19.1745	19.4995
823	10.4	16.4666	21.0166	22.4244	17.2246	22.4244	20.4745	27.6243	19.8245	19.1745
824	10.6166	16.2499	21.2333	22.4244	16.8996	22.4244	19.8245	27.6243	19.8245	19.4995
825	10.6166	16.4666	21.2333	22.4244	16.5746	22.4244	19.8245	27.6243	19.8245	19.8245
826	10.4	16.2499	21.2333	22.7494	16.8996	22.4244	20.4745	27.2993	19.8245	19.1745
827	10.1833	16.4666	21.2333	22.4244	16.8996	22.7494	20.1495	26.9743	19.4995	19.1745
828	10.4	16.2499	21.0166	22.4244	17.2246	22.4244	20.1495	26.9743	19.4995	19.4995
829	10.4	16.4666	21.0166	22.7494	16.8996	22.4244	20.1495	26.9743	19.1745	19.4995
830	10.4	16.2499	21.2333	22.7494	16.8996	22.7494	20.4745	27.2993	19.1745	19.4995
831	10.1833	16.2499	21.0166	22.7494	16.8996	22.7494	19.8245	27.2993	19.4995	19.1745
832	10.4	16.6833	21.2333	22.7494	16.8996	22.7494	20.4745	27.6243	19.4995	19.4995
833	10.4	16.2499	21.2333	22.7494	16.8996	22.0994	20.7995	26.9743	19.1745	19.4995
834	10.1833	16.6833	21.2333	22.4244	16.8996	22.4244	20.1495	27.6243	19.1745	19.4995
835	10.4	16.6833	21.0166	22.4244	16.8996	22.4244	20.4745	27.2993	19.4995	19.4995
836	10.8333	16.8999	21.2333	22.4244	16.8996	22.4244	19.8245	27.6243	19.1745	19.4995
837	10.1833	16.8999	21.2333	22.4244	16.8996	22.4244	20.4745	27.2993	19.8245	19.1745
838	10.6166	16.8999	21.2333	22.4244	16.8996	22.4244	20.4745	27.9493	19.1745	19.4995
839	10.4	16.4666	21.4499	22.4244	16.8996	22.7494	20.4745	27.2993	19.8245	19.8245
840	10.4	16.6833	21.4499	22.4244	16.8996	22.7494	20.7995	26.6493	19.8245	19.8245
841	10.6166	16.6833	21.4499	22.4244	16.8996	22.7494	20.1495	27.2993	19.4995	20.1495
842	10.6166	16.4666	21.4499	22.4244	16.8996	22.4244	20.4745	27.2993	19.4995	19.8245
843	10.4	16.4666	21.4499	22.4244	16.8996	23.0744	20.1495	27.6243	19.4995	19.8245
844	10.6166	16.8999	21.2333	22.4244	16.8996	22.4244	20.4745	27.6243	19.4995	19.8245
845	9.96663	16.6833	21.2333	22.4244	16.8996	22.4244	20.4745	27.9493	19.1745	19.4995
846	10.6166	16.4666	21.4499	22.4244	16.8996	22.7494	20.4745	27.2993	19.4995	19.8245
847	10.6166	16.6833	21.6666	22.4244	16.8996	22.4244	20.1495	27.2993	19.4995	19.1745
848	10.4	16.8999	21.6666	22.7494	16.8996	22.7494	20.4745	26.9743	19.4995	19.4995
849	10.6166	16.6833	21.6666	22.4244	16.8996	22.7494	20.4745	27.2993	19.8245	19.4995
850	10.1833	16.6833	21.0166	22.4244	16.5746	22.7494	20.4745	27.6243	20.1495	19.4995
851	10.1833	16.8999	21.4499	22.4244	16.8996	22.7494	20.1495	27.6243	19.4995	19.4995
852	10.8333	16.8999	21.4499	22.7494	16.8996	22.0994	20.4745	27.2993	20.1495	19.4995
853	10.4	16.6833	21.2333	22.4244	16.8996	22.4244	20.1495	27.9493	19.4995	19.4995
854	10.6166	16.6833	21.6666	22.7494	16.8996	22.4244	20.1495	27.9493	19.4995	19.8245
855	10.6166	16.6833	21.4499	22.7494	16.5746	22.4244	20.4745	27.9493	19.4995	19.8245
856	10.4	16.6833	21.4499	22.7494	16.5746	22.4244	20.1495	27.9493	20.1495	19.4995
857	10.4	16.4666	21.2333	22.7494	16.8996	22.4244	20.1495	27.6243	19.8245	19.8245
858	10.6166	16.4666	21.4499	22.7494	16.8996	22.4244	20.4745	27.2993	19.1745	19.8245
859	10.6166	16.6833	21.2333	22.7494	16.8996	22.4244	20.4745	27.2993	19.8245	19.8245
860	10.6166	16.6833	21.4499	22.7494	16.5746	22.0994	20.1495	27.2993	20.1495	20.1495
861	10.4	16.6833	21.4499	22.4244	16.8996	22.4244	20.4745	27.9493	20.1495	19.8245
862	10.8333	16.6833	21.4499	22.4244	16.8996	22.0994	20.1495	27.9493	19.4995	19.8245
863	10.1833	16.6833	21.4499	22.7494	16.5746	22.7494	20.1495	27.9493	19.4995	20.1495
864	10.8333	16.6833	21.4499	22.7494	16.5746	22.7494	20.4745	27.6243	20.1495	19.8245
865	10.8333	16.8999	21.4499	22.7494	16.5746	23.0744	20.4745	27.9493	20.1495	19.4995
866	10.4	16.8999	21.4499	22.7494	16.5746	22.4244	20.4745	27.6243	20.1495	19.8245
867	10.4	16.4666	21.2333	22.4244	16.5746	22.4244	20.1495	27.9493	20.4745	19.8245
868	10.8333	16.8999	21.2333	22.4244	16.5746	22.0994	20.4745	27.6243	20.4745	19.4995
869	10.6166	16.6833	21.2333	22.4244	16.2496	22.7494	19.8245	27.9493	20.1495	19.8245
870	10.8333	16.4666	21.0166	22.7494	16.2496	22.4244	20.4745	27.9493	19.8245	19.4995
871	11.05	16.6833	21.0166	22.7494	16.8996	22.0994	20.4745	27.6243	20.1495	19.8245
872	10.4	16.6833	20.7999	22.7494	16.8996	22.0994	20.1495	27.6243	19.4995	20.1495
873	10.6166	16.6833	21.2333	22.7494	16.8996	22.0994	20.1495	27.6243	19.8245	20.1495
874	10.4	16.6833	21.0166	22.4244	16.5746	22.4244	20.4745	27.6243	19.8245	19.4995
875	10.8333	16.6833	21.2333	22.7494	16.5746	22.4244	20.4745	27.6243	19.4995	20.1495
876	10.6166	16.4666	21.0166	22.7494	16.5746	22.0994	20.1495	27.6243	19.8245	19.4995
877	10.4	16.6833	21.2333	22.7494	16.5746	22.0994	20.1495	26.9743	19.1745	19.8245
878	10.4	16.4666	21.0166	22.7494	16.5746	22.0994	20.1495	27.6243	20.1495	19.8245
879	10.6166	16.6833	21.0166	22.7494	16.2496	22.4244	19.8245	27.6243	19.4995	19.8245
880	10.6166	16.8999	20.7999	22.7494	16.2496	22.4244	20.4745	27.2993	19.4995	20.1495
881	11.05	16.4666	20.7999	22.7494	16.5746	22.0994	19.8245	26.9743	19.8245	19.4995
882	10.6166	16.4666	21.0166	22.4244	15.9246	22.7494	20.4745	26.9743	19.1745	19.1745
883	10.6166	16.6833	20.7999	22.7494	16.2496	22.0994	20.1495	27.9493	19.1745	19.1745
884	10.6166	16.2499	20.7999	22.7494	16.5746	22.0994	19.8245	27.2993	19.1745	19.1745
885	10.6166	16.6833	20.7999	22.4244	16.5746	22.4244	20.4745	27.9493	19.4995	19.4995
886	10.6166	16.4666	21.0166	22.7494	16.5746	22.4244	19.8245	27.9493	19.1745	19.8245
887	10.8333	16.6833	20.5833	22.7494	16.5746	22.0994	20.1495	27.6243	20.1495	19.4995
888	10.4	16.4666	20.7999	22.7494	16.2496	21.7745	19.8245	27.9493	19.8245	19.4995
889	10.6166	16.6833	20.7999	22.4244	16.5746	22.0994	20.4745	27.6243	19.4995	19.8245
890	10.4	16.4666	20.7999	22.0994	16.5746	22.0994	20.4745	27.6243	19.4995	19.4995
891	10.8333	16.4666	20.5833	22.4244	16.8996	22.0994	20.1495	27.2993	19.4995	19.4995
892	10.6166	16.6833	20.5833	22.4244	16.2496	22.0994	20.1495	27.2993	19.8245	19.8245
893	10.8333	16.2499	20.5833	22.7494	16.5746	22.7494	20.4745	27.2993	19.8245	20.1495
894	10.4	16.2499	20.7999	22.4244	16.2496	22.0994	20.4745	27.6243	19.4995	19.8245
895	10.8333	16.4666	20.7999	22.7494	16.2496	21.7745	20.4745	27.9493	19.1745	19.1745
896	10.6166	16.2499	21.0166	22.4244	16.8996	22.0994	20.7995	27.6243	19.8245	19.4995
897	10.8333	16.0333	20.7999	22.7494	16.8996	21.7745	20.4745	27.6243	19.4995	19.4995
898	10.4	16.4666	20.5833	22.4244	16.2496	22.0994	20.1495	27.6243	20.1495	19.8245
899	10.6166	16.8999	20.5833	22.4244	16.2496	22.0994	20.1495	27.2993	19.4995	19.8245
900	10.6166	16.6833	20.7999	22.7494	16.2496	22.4244	20.1495	27.6243	19.8245	19.8245
901	10.4	16.4666	21.2333	22.4244	16.2496	22.4244	19.8245	27.6243	20.1495	19.4995
902	10.8333	16.8999	21.2333	22.4244	16.5746	22.4244	20.4745	26.9743	19.8245	19.8245
903	10.6166	16.4666	20.5833	22.7494	16.2496	22.4244	20.4745	27.6243	20.1495	19.4995
904	10.6166	16.6833	21.0166	22.7494	16.2496	22.7494	19.8245	27.9493	19.1745	19.8245
905	10.4	16.8999	21.0166	22.7494	16.2496	21.7745	20.4745	26.9743	19.4995	19.8245
906	10.6166	16.6833	20.7999	22.7494	16.5746	22.0994	19.8245	27.6243	19.8245	19.4995
907	10.4	16.6833	21.0166	22.7494	16.2496	22.0994	20.1495	26.6493	20.1495	19.1745
908	10.6166	16.6833	21.0166	22.0994	16.2496	22.4244	20.1495	26.6493	19.1745	19.8245
909	10.8333	16.6833	20.7999	22.4244	16.5746	22.4244	19.8245	27.6243	19.4995	19.8245
910	10.8333	16.4666	20.7999	22.4244	16.2496	22.4244	19.8245	27.6243	19.8245	19.4995
911	10.6166	16.6833	21.2333	22.4244	16.2496	22.0994	19.8245	27.2993	20.1495	19.4995
912	10.6166	16.6833	21.2333	22.4244	16.2496	22.0994	20.4745	27.2993	20.1495	19.4995
913	10.6166	16.8999	21.2333	22.4244	16.5746	22.4244	19.8245	27.2993	19.8245	19.8245
914	10.6166	16.6833	21.0166	22.4244	16.2496	22.4244	19.8245	27.2993	20.1495	19.4995
915	10.6166	16.6833	20.7999	22.4244	16.2496	22.0994	20.1495	26.9743	19.4995	19.8245
916	10.6166	16.6833	20.7999	22.4244	16.2496	21.7745	20.4745	27.6243	19.8245	20.1495
917	10.4	16.6833	21.2333	22.7494	16.2496	22.0994	20.4745	27.6243	19.4995	19.1745
918	10.8333	16.8999	21.2333	22.4244	16.2496	22.0994	20.4745	27.9493	19.4995	19.8245
919	10.4	16.6833	21.0166	22.4244	16.5746	22.0994	19.4995	27.9493	19.4995	19.4995
920	10.6166	16.4666	20.7999	22.4244	16.5746	22.0994	19.8245	27.6243	19.8245	19.8245
921	10.1833	16.8999	21.2333	22.4244	16.2496	21.7745	19.4995	27.6243	19.8245	19.8245
922	10.4	16.4666	20.7999	22.4244	16.5746	21.7745	19.8245	27.6243	20.1495	19.8245
923	10.4	16.6833	21.2333	22.4244	16.2496	22.0994	19.1745	27.2993	20.1495	19.4995
924	10.4	16.4666	21.2333	22.4244	16.2496	21.7745	19.8245	26.9743	19.4995	19.4995
925	10.4	16.6833	21.0166	22.4244	16.5746	22.0994	19.8245	27.6243	20.1495	19.4995
926	10.6166	16.6833	21.0166	22.4244	16.5746	21.7745	19.8245	27.6243	20.1495	20.1495
927	10.4	16.2499	21.0166	22.4244	16.5746	21.4495	20.1495	27.2993	19.4995	19.8245
928	10.4	16.4666	21.2333	22.4244	16.2496	22.0994	19.4995	27.6243	19.8245	19.8245
929	10.4	16.4666	21.0166	22.4244	16.5746	22.0994	20.4745	27.6243	19.8245	19.4995
930	10.1833	16.0333	21.0166	22.4244	16.5746	22.0994	19.4995	27.6243	20.1495	19.8245
931	10.1833	16.2499	21.0166	22.0994	16.5746	21.7745	19.4995	27.2993	19.4995	20.1495
932	10.1833	16.4666	21.0166	22.4244	16.8996	21.7745	19.1745	27.2993	19.4995	19.8245
933	10.6166	16.4666	21.0166	22.4244	16.2496	22.4244	19.8245	27.2993	19.4995	20.1495
934	10.8333	16.6833	21.0166	22.4244	16.5746	22.4244	19.8245	27.9493	20.1495	19.8245
935	10.6166	16.2499	20.7999	22.4244	16.5746	22.0994	19.4995	27.2993	20.4745	20.1495
936	10.1833	16.6833	21.0166	22.0994	16.5746	22.0994	19.4995	28.2743	19.4995	19.8245
937	10.4	16.4666	21.0166	22.4244	16.5746	22.0994	19.1745	27.2993	20.1495	19.8245
938	10.6166	16.4666	21.0166	22.4244	16.2496	22.4244	19.8245	27.2993	20.1495	19.8245
939	10.6166	16.2499	20.7999	22.7494	16.2496	22.4244	19.4995	27.2993	20.1495	19.4995
940	10.4	16.2499	20.7999	22.4244	16.5746	22.0994	19.8245	27.6243	19.8245	19.8245
941	10.4	16.4666	20.7999	22.7494	16.5746	22.4244	20.1495	27.9493	19.4995	19.8245
942	10.4	16.4666	21.0166	22.7494	16.5746	22.4244	19.8245	27.9493	19.8245	19.8245
943	10.4	16.4666	21.0166	22.7494	16.5746	22.4244	19.4995	27.6243	19.8245	19.4995
944	10.6166	16.6833	21.0166	23.0744	16.2496	22.4244	19.8245	28.2743	19.8245	19.8245
945	10.8333	16.4666	21.0166	22.7494	16.5746	22.4244	19.8245	27.6243	19.8245	19.4995
946	10.4	16.4666	20.7999	22.7494	15.9246	22.4244	19.8245	27.2993	20.1495	19.4995
947	10.6166	16.6833	21.0166	23.0744	16.2496	22.4244	19.4995	27.6243	19.8245	19.4995
948	10.1833	16.6833	21.0166	23.0744	16.2496	22.7494	19.8245	28.2743	19.4995	19.4995
949	10.8333	16.4666	21.0166	22.7494	15.9246	22.4244	19.8245	26.9743	20.1495	19.4995
950	10.4	16.2499	21.2333	23.0744	16.2496	22.4244	19.8245	27.2993	19.4995	19.4995
951	10.6166	16.2499	21.0166	23.0744	16.2496	22.4244	19.8245	26.9743	19.8245	19.4995
952	10.4	16.4666	21.0166	22.7494	16.5746	22.4244	19.8245	27.9493	19.4995	19.8245
953	10.6166	16.4666	21.0166	22.7494	16.5746	22.4244	19.4995	27.6243	19.4995	19.1745
954	10.1833	16.2499	21.0166	23.0744	16.2496	22.4244	19.8245	27.6243	19.4995	19.4995
955	10.1833	16.4666	21.0166	23.0744	16.2496	22.4244	20.1495	27.2993	20.1495	19.4995
956	10.6166	16.0333	20.7999	23.0744	16.2496	22.0994	19.4995	27.6243	19.1745	19.4995
957	10.1833	16.4666	20.7999	22.7494	16.2496	22.4244	20.1495	27.6243	19.8245	19.4995
958	10.4	16.2499	20.7999	23.0744	16.2496	22.4244	20.1495	26.9743	19.8245	19.8245
959	10.6166	16.2499	21.2333	23.0744	15.5996	23.0744	19.8245	26.9743	20.1495	19.8245
960	11.05	16.6833	21.0166	22.7494	16.2496	23.0744	19.4995	27.6243	19.8245	19.8245
961	10.1833	16.4666	21.0166	23.0744	16.2496	22.7494	19.8245	27.2993	20.1495	19.1745
962	10.4	16.4666	20.7999	23.0744	15.5996	22.4244	19.1745	27.6243	19.8245	19.4995
963	10.1833	16.4666	20.7999	23.0744	15.2746	22.4244	19.4995	26.9743	20.1495	19.4995
964	10.4	16.4666	21.0166	23.0744	15.9246	22.4244	19.8245	27.2993	20.1495	19.4995
965	10.6166	16.2499	21.2333	22.7494	15.9246	22.4244	19.1745	27.9493	19.4995	20.1495
966	10.6166	16.4666	21.2333	22.7494	16.2496	22.4244	20.1495	27.2993	19.8245	19.4995
967	10.4	16.2499	21.0166	23.0744	15.9246	22.4244	19.8245	27.6243	19.8245	19.8245
968	10.8333	16.6833	21.0166	22.7494	16.2496	22.4244	19.8245	27.2993	19.8245	19.4995
969	10.6166	16.4666	21.0166	23.0744	16.2496	22.4244	19.8245	27.9493	19.4995	19.8245
970	10.6166	16.2499	21.0166	23.0744	16.5746	22.4244	20.1495	26.9743	20.1495	19.8245
971	10.6166	16.0333	21.0166	22.7494	15.9246	22.7494	19.8245	27.9493	20.4745	19.4995
972	10.4	16.2499	21.2333	23.0744	15.5996	22.7494	19.4995	27.9493	20.1495	19.8245
973	10.6166	16.2499	21.2333	22.7494	15.5996	22.7494	19.8245	27.6243	19.8245	19.8245
974	10.6166	16.4666	21.2333	22.7494	15.9246	22.7494	19.4995	27.6243	20.1495	19.8245
975	10.6166	16.4666	21.2333	23.0744	15.9246	22.4244	19.4995	26.9743	20.1495	19.8245
976	10.4	16.4666	21.2333	22.7494	15.9246	22.4244	19.8245	27.9493	19.8245	20.1495
977	10.6166	16.4666	21.0166	23.0744	15.9246	22.7494	19.8245	27.9493	20.1495	19.8245
978	10.4	16.2499	20.7999	23.0744	16.2496	22.7494	19.8245	27.6243	19.8245	19.8245
979	10.1833	16.4666	21.0166	23.0744	16.5746	22.7494	19.8245	27.6243	20.4745	19.4995
980	10.1833	16.4666	21.2333	22.7494	15.9246	22.4244	19.4995	27.2993	20.1495	19.8245
981	10.4	16.4666	21.0166	22.7494	15.9246	22.7494	20.1495	27.6243	20.1495	19.8245
982	10.8333	16.2499	21.0166	23.0744	15.9246	22.4244	20.1495	28.2743	20.1495	19.8245
983	10.4	16.6833	21.2333	23.0744	15.9246	22.0994	19.8245	27.9493	20.1495	19.8245
984	10.8333	16.4666	20.7999	22.7494	15.5996	22.4244	19.8245	27.9493	20.7995	19.8245
985	9.96663	16.2499	21.0166	22.7494	15.9246	22.7494	19.4995	27.2993	20.1495	19.4995
986	11.05	16.8999	21.2333	23.0744	15.5996	22.4244	20.4745	27.2993	20.1495	19.4995
987	10.1833	16.6833	21.0166	23.0744	15.9246	22.4244	19.8245	27.9493	20.7995	19.4995
988	10.6166	16.6833	21.0166	22.7494	15.5996	22.4244	19.8245	27.6243	20.7995	19.8245
989	10.6166	16.4666	21.0166	23.0744	15.9246	22.0994	19.4995	27.6243	20.4745	19.4995
990	10.1833	16.8999	21.0166	23.0744	15.2746	22.7494	19.4995	27.6243	21.1245	20.4745
991	9.96663	16.4666	21.0166	23.0744	15.5996	22.4244	20.1495	27.9493	20.7995	19.8245
992	10.1833	16.6833	21.0166	22.7494	15.9246	22.7494	20.1495	27.2993	20.4745	20.1495
993	10.4	16.2499	21.2333	23.0744	15.5996	22.4244	20.1495	27.6243	19.8245	20.1495
994	10.1833	16.6833	21.2333	22.7494	15.9246	22.7494	19.8245	27.9493	20.7995	19.8245
995	10.4	16.2499	21.2333	23.0744	15.9246	22.7494	19.8245	27.9493	21.4495	19.8245
996	10.4	16.2499	21.2333	23.0744	15.9246	22.7494	20.1495	28.2743	19.8245	19.8245
997	10.1833	16.6833	21.0166	22.7494	15.9246	22.7494	19.8245	27.6243	20.4745	19.8245
998	10.4	16.6833	21.2333	23.0744	15.9246	22.7494	18.8495	27.2993	20.1495	19.8245
999	9.96663	16.8999	21.2333	22.7494	16.2496	23.0744	19.4995	27.6243	20.4745	20.1495
1000	10.1833	16.4666	21.2333	22.7494	15.9246	22.7494	19.8245	27.2993	20.1495	20.4745
1001	10.4	16.8999	21.0166	22.7494	16.2496	22.4244	19.8245	27.6243	20.4745	20.1495
1002	10.6166	16.6833	21.0166	23.0744	16.2496	22.7494	19.8245	27.6243	20.1495	19.8245
1003	9.96663	16.8999	21.0166	23.0744	15.9246	22.7494	20.4745	27.6243	20.4745	19.4995
1004	10.6166	17.1166	21.2333	23.0744	15.9246	22.7494	19.8245	27.9493	20.1495	19.4995
1005	10.4	16.8999	21.2333	22.7494	15.9246	22.7494	19.8245	27.6243	20.1495	19.8245
1006	10.1833	16.8999	21.0166	22.7494	15.9246	22.0994	19.4995	27.9493	20.1495	19.8245
1007	10.4	17.1166	21.0166	22.7494	15.9246	22.7494	19.8245	27.2993	20.1495	19.8245
1008	10.4	16.8999	21.0166	23.0744	15.9246	22.4244	19.8245	27.6243	20.1495	19.8245
1009	10.8333	16.4666	21.0166	22.7494	16.2496	22.4244	19.4995	27.9493	20.1495	19.8245
1010	10.1833	17.1166	20.7999	23.0744	15.9246	22.7494	18.8495	27.9493	20.4745	20.1495
1011	10.4	16.6833	20.7999	22.7494	16.2496	22.0994	19.8245	27.9493	21.4495	19.8245
1012	10.6166	16.8999	21.2333	23.0744	16.5746	22.4244	19.8245	27.6243	20.4745	20.1495
1013	10.4	16.6833	20.7999	23.0744	16.2496	22.4244	19.1745	27.6243	20.4745	19.8245
1014	10.1833	16.8999	21.0166	22.7494	16.2496	22.0994	19.4995	27.6243	21.1245	19.8245
1015	10.1833	16.8999	20.7999	23.0744	15.9246	22.4244	19.4995	27.9493	20.4745	19.8245
1016	10.6166	17.1166	21.0166	22.7494	16.2496	22.4244	20.1495	26.9743	20.7995	19.8245
1017	10.6166	16.6833	20.7999	22.7494	16.2496	22.0994	19.4995	27.6243	20.1495	19.8245
1018	10.4	16.6833	21.2333	22.7494	16.2496	22.4244	19.4995	27.6243	21.1245	19.8245
1019	10.6166	16.4666	21.0166	22.7494	16.2496	22.4244	19.4995	27.9493	21.1245	19.4995
1020	10.1833	16.6833	20.7999	22.7494	16.2496	22.0994	19.8245	27.6243	20.4745	19.8245
1021	10.6166	16.4666	21.0166	22.7494	16.2496	22.0994	20.1495	27.6243	20.7995	19.4995
1022	10.4	16.6833	20.7999	22.7494	15.9246	22.7494	19.8245	27.9493	20.4745	20.4745
1023	10.4	16.6833	21.0166	23.0744	16.5746	22.0994	20.1495	27.9493	21.1245	19.4995
1024	10.1833	16.4666	21.0166	23.0744	16.5746	21.7745	19.8245	27.9493	20.4745	19.8245
1025	10.4	16.4666	20.5833	23.0744	16.5746	22.0994	19.8245	27.9493	20.7995	19.8245
1026	10.1833	16.4666	21.0166	22.7494	16.5746	22.0994	19.8245	27.2993	20.4745	19.8245
1027	10.1833	16.4666	20.7999	22.7494	16.5746	22.0994	19.4995	27.6243	20.4745	20.1495
1028	11.05	16.4666	21.0166	22.7494	16.2496	22.4244	19.4995	27.2993	20.4745	19.8245
1029	10.4	16.6833	20.7999	23.0744	16.2496	22.0994	19.8245	27.6243	20.4745	19.8245
1030	10.6166	16.4666	20.7999	22.7494	16.5746	22.0994	19.8245	27.9493	20.7995	19.8245
1031	10.4	16.6833	21.0166	23.0744	16.5746	22.0994	20.1495	27.6243	20.7995	19.8245
1032	10.1833	16.4666	21.0166	22.7494	16.5746	21.7745	19.8245	27.6243	21.1245	19.8245
1033	10.4	16.6833	20.7999	22.7494	16.5746	22.0994	19.8245	27.6243	20.4745	20.1495
1034	10.6166	16.6833	21.0166	23.0744	16.5746	22.0994	19.4995	27.9493	20.1495	20.1495
1035	9.96663	16.6833	20.7999	23.0744	16.5746	21.7745	20.1495	27.6243	20.7995	19.4995
1036	10.1833	16.4666	20.7999	22.7494	16.5746	22.0994	19.8245	26.9743	20.4745	19.8245
1037	10.6166	16.8999	20.7999	22.7494	16.5746	22.0994	20.1495	27.6243	20.1495	20.1495
1038	10.1833	16.6833	21.0166	23.0744	16.5746	22.0994	19.1745	27.6243	20.4745	20.1495
1039	10.6166	16.4666	20.7999	22.7494	16.5746	22.0994	19.8245	27.9493	20.4745	19.8245
1040	10.1833	16.4666	21.2333	23.0744	16.2496	22.4244	19.4995	27.9493	20.4745	20.1495
1041	10.6166	16.4666	21.0166	22.7494	16.2496	22.0994	19.8245	27.9493	20.4745	20.1495
1042	10.6166	16.8999	21.0166	23.0744	16.5746	22.0994	19.4995	27.9493	19.8245	19.8245
1043	10.8333	16.4666	20.7999	23.0744	16.5746	22.0994	20.1495	27.9493	20.4745	20.1495
1044	10.8333	16.4666	20.7999	22.7494	16.5746	22.0994	19.4995	27.2993	19.8245	19.8245
1045	10.8333	16.8999	20.7999	22.7494	16.5746	22.4244	19.4995	27.6243	20.7995	19.8245
1046	10.4	16.4666	20.7999	23.0744	16.5746	22.4244	20.1495	27.9493	20.1495	19.8245
1047	10.8333	16.8999	20.7999	22.7494	16.5746	22.0994	19.4995	27.9493	20.4745	19.8245
1048	10.8333	16.6833	20.7999	22.7494	16.5746	22.4244	19.8245	27.6243	19.8245	19.8245
1049	10.8333	16.8999	20.7999	22.7494	16.2496	22.0994	19.4995	27.6243	20.1495	19.8245
1050	10.4	16.6833	21.0166	23.0744	15.9246	21.7745	19.4995	27.2993	20.1495	19.8245
1051	10.6166	16.6833	20.7999	22.7494	16.2496	22.7494	19.8245	27.9493	20.4745	20.1495
1052	10.6166	16.6833	20.5833	23.0744	15.9246	22.0994	19.4995	27.2993	20.4745	19.8245
1053	10.6166	17.1166	21.0166	22.7494	16.2496	21.7745	19.8245	27.6243	20.1495	20.1495
1054	10.1833	16.8999	21.0166	22.7494	16.2496	22.4244	19.8245	27.6243	20.1495	20.1495
1055	10.6166	16.4666	20.7999	22.7494	15.9246	21.7745	19.8245	27.6243	20.7995	20.1495
1056	10.8333	16.6833	21.0166	22.7494	16.2496	21.7745	19.8245	27.6243	20.1495	20.4745
1057	10.4	16.8999	20.7999	22.7494	16.2496	22.4244	19.8245	27.9493	20.4745	20.1495
1058	10.6166	16.4666	20.7999	22.7494	15.9246	22.0994	19.8245	27.6243	20.7995	20.1495
1059	10.8333	16.4666	20.5833	22.7494	16.5746	21.7745	19.8245	27.6243	20.1495	19.8245
1060	10.4	16.4666	20.5833	22.7494	16.5746	22.0994	19.8245	27.6243	20.4745	19.8245
1061	10.4	16.4666	20.7999	23.0744	16.5746	22.0994	19.8245	27.6243	20.4745	20.1495
1062	10.6166	16.4666	20.3666	22.7494	16.5746	21.7745	19.8245	27.6243	20.4745	20.1495
1063	9.96663	16.4666	21.0166	22.7494	16.5746	22.0994	20.1495	28.2743	21.4495	19.8245
1064	10.8333	16.4666	20.7999	23.0744	16.5746	22.0994	19.8245	27.9493	20.7995	20.1495
1065	10.4	16.6833	21.0166	23.0744	16.5746	22.0994	19.4995	27.9493	20.4745	19.8245
1066	10.8333	17.1166	21.0166	23.0744	16.2496	22.0994	19.4995	28.2743	20.7995	19.8245
1067	10.8333	16.2499	20.7999	23.0744	16.2496	22.4244	19.8245	27.6243	20.7995	19.8245
1068	10.6166	16.6833	20.5833	23.0744	16.2496	22.0994	20.4745	27.6243	20.4745	19.8245
1069	10.8333	16.6833	20.3666	23.0744	16.5746	21.7745	19.8245	27.2993	20.4745	19.8245
1070	10.6166	16.4666	20.7999	22.7494	16.2496	22.4244	19.8245	26.9743	20.7995	19.8245
1071	11.05	16.4666	20.5833	23.0744	16.2496	21.7745	19.4995	27.9493	20.4745	19.8245
1072	10.6166	16.6833	20.7999	22.7494	16.5746	22.4244	19.8245	27.2993	20.4745	19.8245
1073	10.6166	17.1166	20.7999	22.7494	16.2496	22.0994	19.4995	27.9493	20.7995	19.8245
1074	10.6166	16.4666	20.5833	22.7494	16.5746	21.7745	20.4745	27.9493	21.4495	19.8245
1075	10.6166	16.4666	20.5833	22.7494	16.5746	22.0994	19.8245	27.2993	20.1495	19.8245
1076	10.1833	16.8999	20.7999	22.7494	16.2496	21.7745	20.1495	27.2993	20.7995	19.8245
1077	10.6166	16.8999	20.5833	22.7494	16.2496	22.0994	19.4995	27.2993	20.1495	19.8245
1078	10.6166	17.1166	21.0166	22.7494	16.5746	21.7745	19.8245	27.6243	20.7995	19.4995
1079	10.6166	16.6833	20.7999	22.7494	16.5746	22.4244	20.1495	28.2743	20.7995	20.1495
1080	10.8333	16.6833	20.5833	23.0744	16.5746	21.7745	20.4745	27.6243	20.1495	19.8245
1081	10.1833	16.6833	20.7999	22.7494	16.5746	21.7745	20.1495	27.6243	20.7995	19.8245
1082	10.4	16.6833	21.0166	23.0744	16.8996	21.4495	20.1495	27.6243	20.7995	20.1495
1083	10.1833	16.6833	20.7999	22.7494	16.2496	21.7745	19.8245	27.9493	20.7995	19.8245
1084	10.6166	16.6833	21.2333	23.0744	16.8996	22.0994	20.1495	28.2743	21.4495	20.1495
1085	10.4	16.6833	20.7999	23.0744	16.5746	22.0994	19.8245	27.9493	20.4745	19.8245
1086	10.4	16.2499	20.7999	22.7494	16.8996	21.4495	20.1495	27.9493	20.7995	19.8245
1087	10.6166	16.6833	20.5833	22.7494	16.5746	21.7745	20.4745	27.6243	20.7995	20.1495
1088	10.6166	16.6833	20.7999	23.0744	16.5746	21.7745	19.8245	27.9493	20.4745	19.8245
1089	10.6166	16.8999	21.0166	23.0744	15.9246	21.1245	20.1495	26.9743	20.7995	20.1495
1090	11.05	16.6833	21.0166	22.7494	15.5996	21.7745	20.1495	27.6243	20.1495	20.1495
1091	10.8333	16.4666	20.7999	23.0744	15.9246	21.7745	20.4745	28.2743	19.8245	20.4745
1092	10.8333	16.6833	20.7999	22.7494	15.9246	21.4495	20.1495	27.6243	21.1245	20.1495
1093	10.8333	16.6833	21.0166	23.0744	16.2496	22.0994	19.8245	27.9493	20.7995	19.8245
1094	10.8333	16.6833	21.0166	22.7494	16.5746	22.0994	20.1495	27.9493	20.4745	19.8245
1095	10.6166	16.6833	21.0166	22.7494	16.5746	22.0994	20.1495	27.9493	21.1245	19.8245
1096	10.4	16.6833	21.0166	23.0744	16.5746	21.7745	19.4995	27.9493	20.4745	20.1495
1097	10.6166	16.8999	21.0166	22.7494	15.9246	21.7745	20.1495	27.6243	20.7995	19.8245
1098	10.8333	16.6833	21.0166	22.7494	15.5996	21.4495	19.8245	27.9493	20.4745	19.8245
1099	10.6166	16.4666	21.0166	22.7494	16.5746	22.4244	19.8245	27.6243	20.4745	20.1495
1100	10.6166	16.2499	20.7999	22.7494	15.9246	22.0994	20.4745	27.9493	20.4745	20.1495
1101	10.6166	16.4666	20.7999	22.7494	15.9246	22.0994	19.8245	27.6243	20.7995	19.8245
1102	10.6166	16.6833	21.0166	22.7494	16.2496	22.0994	20.1495	27.6243	21.1245	20.1495
1103	10.8333	16.2499	20.7999	22.7494	15.9246	22.4244	19.8245	27.6243	20.1495	19.8245
1104	10.4	16.4666	20.7999	23.0744	15.9246	22.0994	20.1495	27.9493	20.4745	20.1495
1105	10.8333	16.8999	20.3666	22.7494	16.2496	22.0994	19.8245	27.6243	20.7995	20.1495
1106	11.05	16.6833	20.7999	23.0744	16.2496	22.0994	19.8245	27.9493	21.1245	20.1495
1107	10.8333	16.6833	20.7999	23.0744	16.5746	21.7745	20.1495	27.9493	21.1245	20.1495
1108	11.05	16.2499	20.5833	22.7494	16.2496	22.4244	20.1495	27.9493	20.1495	19.8245
1109	10.6166	16.4666	20.7999	22.7494	16.2496	22.4244	19.8245	28.2743	20.4745	20.1495
1110	10.8333	16.6833	21.0166	23.0744	16.5746	21.7745	19.8245	27.9493	21.1245	19.8245
1111	10.6166	16.4666	20.7999	23.0744	16.2496	22.0994	20.1495	27.6243	20.7995	20.1495
1112	10.6166	16.2499	20.7999	22.7494	16.2496	21.7745	20.1495	27.9493	20.7995	19.8245
1113	10.1833	16.6833	20.7999	22.7494	16.2496	21.7745	19.8245	28.2743	20.4745	19.8245
1114	10.8333	16.6833	21.0166	23.0744	16.5746	21.7745	20.1495	28.2743	20.4745	19.8245
1115	10.6166	16.6833	20.7999	22.7494	16.2496	22.4244	20.1495	28.2743	20.7995	20.1495
1116	10.6166	16.6833	21.0166	22.7494	15.9246	22.0994	20.4745	27.2993	20.4745	20.1495
1117	10.6166	16.0333	21.0166	23.0744	16.2496	22.0994	20.1495	28.2743	20.7995	20.4745
1118	10.8333	16.4666	21.0166	23.0744	15.9246	21.7745	20.1495	27.6243	20.7995	20.1495
1119	10.6166	16.4666	21.0166	22.7494	15.9246	22.0994	20.1495	28.2743	20.7995	20.1495
1120	10.6166	16.4666	20.7999	22.7494	15.9246	21.7745	20.1495	27.6243	20.1495	20.1495
1121	10.6166	16.6833	21.0166	23.0744	15.9246	21.7745	19.8245	28.2743	20.7995	20.1495
1122	10.8333	16.2499	20.7999	22.7494	15.5996	22.4244	20.1495	27.9493	20.7995	19.8245
1123	10.4	16.6833	20.7999	22.7494	16.2496	21.7745	19.8245	27.6243	21.4495	19.8245
1124	10.8333	16.8999	21.0166	23.0744	16.2496	22.0994	20.1495	28.2743	20.1495	19.8245
1125	10.6166	16.4666	21.0166	23.0744	16.2496	22.0994	19.8245	27.6243	20.7995	19.8245
1126	10.8333	16.4666	21.0166	23.0744	16.2496	22.0994	20.1495	27.6243	21.4495	19.8245
1127	10.8333	16.8999	21.0166	22.7494	16.2496	22.0994	20.1495	28.2743	20.7995	20.1495
1128	10.4	16.4666	21.2333	22.7494	16.5746	22.0994	20.1495	28.2743	21.1245	20.4745
1129	10.8333	16.6833	21.2333	22.7494	16.2496	22.4244	19.8245	27.9493	21.1245	19.8245
1130	11.05	16.4666	21.0166	22.7494	16.2496	21.7745	19.8245	28.2743	20.7995	19.8245
1131	10.6166	16.6833	21.0166	23.0744	16.2496	22.0994	20.1495	27.9493	20.7995	19.8245
1132	10.8333	16.2499	20.7999	22.7494	16.2496	21.7745	19.8245	28.2743	20.4745	19.8245
1133	10.8333	16.2499	21.0166	22.7494	16.5746	22.0994	19.8245	27.9493	20.7995	19.8245
1134	10.6166	16.4666	21.0166	23.0744	16.2496	21.7745	20.1495	28.5993	21.1245	19.8245
1135	10.6166	16.6833	21.0166	23.0744	16.2496	21.7745	20.1495	27.9493	20.7995	20.1495
1136	10.8333	16.2499	20.7999	22.7494	16.2496	22.0994	20.1495	28.2743	20.7995	19.8245
1137	10.6166	16.4666	21.0166	23.0744	16.2496	22.0994	20.1495	27.9493	20.4745	19.8245
1138	10.8333	16.2499	21.2333	23.0744	15.9246	21.7745	20.4745	27.9493	20.4745	19.8245
1139	11.05	16.0333	21.0166	22.7494	16.5746	22.4244	20.4745	27.9493	21.1245	19.4995
1140	10.8333	16.4666	21.2333	22.7494	16.2496	22.0994	20.4745	27.6243	20.4745	19.8245
1141	10.6166	16.4666	21.2333	22.7494	15.9246	22.0994	19.8245	27.2993	20.7995	20.1495
1142	10.8333	16.4666	20.7999	22.7494	16.5746	22.0994	20.4745	28.2743	20.1495	19.8245
1143	10.8333	16.4666	21.0166	22.7494	16.2496	22.4244	20.4745	27.9493	20.7995	19.8245
1144	10.8333	16.2499	20.5833	22.7494	15.9246	22.0994	20.4745	28.5993	20.7995	19.8245
1145	10.6166	16.4666	21.4499	22.7494	16.2496	21.4495	20.1495	27.2993	20.7995	20.1495
1146	10.4	16.4666	21.2333	22.7494	16.5746	22.0994	20.1495	27.2993	20.4745	20.1495
1147	10.6166	16.4666	21.2333	22.7494	16.5746	22.0994	20.1495	27.2993	20.4745	20.1495
1148	10.8333	16.4666	21.0166	22.7494	16.5746	21.7745	20.1495	27.9493	21.4495	20.1495
1149	10.4	16.6833	21.0166	23.0744	15.9246	22.0994	19.8245	27.2993	21.1245	19.8245
1150	10.4	16.6833	21.4499	22.7494	16.5746	22.7494	20.4745	27.9493	21.1245	19.8245
1151	10.4	16.2499	21.2333	23.0744	16.5746	22.0994	21.1245	27.2993	20.7995	19.8245
1152	10.6166	16.4666	21.2333	22.7494	15.9246	22.0994	20.4745	27.9493	21.7745	20.1495
1153	11.05	16.4666	21.2333	22.7494	15.9246	22.0994	20.4745	27.6243	20.7995	20.1495
1154	10.8333	16.8999	20.5833	22.7494	16.2496	22.0994	19.4995	27.9493	20.7995	20.1495
1155	10.6166	15.8166	21.0166	23.0744	16.5746	22.0994	20.4745	27.6243	20.7995	20.1495
1156	10.8333	16.2499	21.0166	23.0744	16.2496	22.0994	20.4745	27.2993	21.1245	19.8245
1157	11.05	16.6833	20.7999	22.7494	15.9246	22.0994	19.8245	27.6243	20.7995	19.8245
1158	11.05	16.2499	21.0166	23.0744	15.9246	21.7745	20.1495	28.2743	20.1495	20.1495
1159	10.6166	16.4666	20.3666	22.7494	16.2496	22.4244	19.8245	27.6243	20.7995	20.1495
1160	10.4	16.4666	21.0166	23.0744	15.9246	21.4495	19.8245	27.6243	20.4745	20.1495
1161	11.05	16.4666	21.2333	22.7494	16.5746	22.0994	20.1495	27.6243	20.7995	19.8245
1162	10.4	16.4666	21.0166	23.0744	16.5746	22.4244	19.8245	27.9493	20.4745	19.8245
1163	10.8333	16.4666	21.4499	22.4244	16.2496	22.4244	20.1495	27.2993	20.4745	19.8245
1164	10.8333	16.6833	20.7999	23.0744	16.2496	22.0994	20.1495	27.9493	20.4745	20.1495
1165	11.05	16.4666	20.7999	22.7494	16.2496	22.4244	20.1495	28.2743	21.1245	20.4745
1166	10.8333	16.4666	21.0166	22.7494	16.2496	21.7745	20.4745	27.9493	20.7995	19.8245
1167	11.05	16.2499	21.2333	22.7494	16.5746	22.0994	20.1495	27.6243	20.7995	20.1495
1168	10.8333	16.4666	20.7999	22.7494	16.5746	22.4244	20.4745	27.6243	21.4495	20.1495
1169	10.8333	16.2499	21.0166	23.0744	16.2496	22.0994	20.1495	27.9493	20.7995	20.1495
1170	10.8333	16.2499	21.0166	22.7494	16.5746	22.0994	20.1495	27.9493	20.7995	19.8245
1171	10.4	16.4666	21.0166	22.7494	16.5746	22.4244	20.1495	27.6243	21.1245	20.1495
1172	11.05	16.4666	21.4499	22.4244	16.5746	22.7494	20.1495	26.9743	20.7995	19.8245
1173	10.8333	16.6833	20.3666	22.7494	16.2496	22.4244	20.1495	27.6243	21.1245	20.1495
1174	10.8333	16.4666	21.2333	22.7494	16.5746	22.0994	20.1495	27.9493	20.4745	20.1495
1175	10.8333	16.4666	21.2333	23.0744	16.5746	22.7494	20.1495	27.6243	20.4745	20.1495
1176	11.05	16.2499	20.5833	22.7494	16.2496	22.4244	19.8245	27.9493	20.7995	20.1495
1177	11.05	16.4666	21.0166	22.7494	16.2496	22.0994	19.8245	27.6243	20.7995	20.1495
1178	10.8333	16.4666	21.0166	23.0744	16.2496	22.7494	20.7995	27.9493	20.7995	20.4745
1179	10.8333	16.6833	20.3666	22.7494	16.2496	22.7494	20.4745	27.9493	21.1245	20.1495
1180	10.8333	16.4666	21.0166	22.4244	16.2496	22.4244	19.8245	27.6243	21.1245	20.1495
1181	10.6166	16.2499	20.7999	22.7494	16.2496	22.0994	20.4745	27.9493	20.7995	19.8245
1182	10.4	16.4666	20.5833	22.7494	16.2496	22.4244	20.1495	27.6243	20.7995	19.8245
1183	10.8333	16.2499	20.7999	23.0744	16.2496	22.4244	20.1495	27.6243	20.7995	20.1495
1184	11.05	16.2499	21.0166	22.7494	15.9246	22.0994	20.1495	27.6243	20.7995	19.8245
1185	10.8333	16.4666	21.2333	23.0744	15.9246	22.7494	20.4745	27.9493	20.4745	19.8245
1186	11.05	16.4666	21.0166	22.4244	16.2496	22.4244	20.4745	27.9493	21.4495	20.1495
1187	11.05	16.6833	21.2333	22.7494	16.2496	22.7494	20.1495	27.9493	20.4745	20.1495
1188	11.05	16.2499	21.0166	22.7494	15.9246	22.4244	19.8245	28.2743	20.7995	20.1495
1189	10.8333	16.4666	21.0166	22.7494	15.9246	22.0994	20.4745	28.2743	20.7995	20.4745
1190	10.6166	16.4666	20.7999	22.7494	16.2496	22.4244	19.8245	27.9493	20.7995	20.1495
1191	10.6166	16.2499	21.0166	22.7494	16.2496	22.4244	20.4745	26.9743	21.1245	20.4745
1192	10.8333	16.2499	20.7999	22.7494	16.2496	22.7494	19.8245	27.9493	20.4745	19.8245
1193	10.6166	16.0333	21.0166	22.7494	15.9246	22.4244	20.1495	27.9493	20.7995	20.1495
1194	10.8333	16.2499	21.2333	22.7494	16.2496	22.4244	20.1495	27.2993	20.7995	19.8245
1195	11.05	16.4666	21.0166	23.0744	16.2496	21.7745	20.1495	27.6243	21.1245	19.8245
1196	10.8333	16.0333	21.2333	22.7494	15.9246	22.4244	20.4745	27.6243	20.1495	19.8245
1197	10.1833	16.2499	21.0166	22.4244	16.2496	22.4244	20.1495	27.2993	20.4745	20.4745
1198	10.8333	16.4666	21.0166	22.7494	15.9246	22.0994	19.8245	27.6243	20.7995	20.4745
1199	10.4	16.2499	21.0166	22.7494	15.9246	22.0994	19.8245	27.6243	21.1245	20.1495
1200	10.8333	16.6833	21.2333	22.7494	16.2496	22.4244	20.4745	27.2993	20.7995	19.8245
1201	11.05	16.2499	21.0166	22.4244	16.2496	22.4244	20.4745	27.9493	21.1245	20.1495
1202	10.8333	16.4666	21.0166	23.0744	16.2496	22.4244	19.8245	27.6243	21.1245	19.8245
1203	11.05	16.4666	21.2333	22.4244	16.2496	22.4244	20.1495	27.2993	20.7995	20.1495
1204	11.05	16.2499	21.4499	22.7494	16.2496	22.4244	20.1495	27.6243	20.7995	20.1495
1205	10.8333	16.4666	21.2333	23.0744	16.5746	22.0994	20.1495	27.6243	21.1245	20.4745
1206	10.6166	16.4666	21.2333	23.0744	16.5746	22.0994	20.4745	27.2993	21.1245	19.8245
1207	11.05	16.2499	21.2333	22.7494	15.9246	22.4244	20.4745	27.6243	20.7995	20.1495
1208	11.05	16.2499	21.0166	22.7494	16.5746	22.4244	20.1495	27.6243	21.7745	20.1495
1209	11.05	16.4666	21.0166	23.0744	16.2496	22.7494	20.7995	27.6243	20.7995	19.8245
1210	11.05	16.2499	21.0166	22.7494	16.2496	22.4244	19.8245	27.9493	20.7995	19.8245
1211	11.05	16.2499	21.2333	23.0744	16.5746	21.7745	20.4745	27.6243	20.4745	20.4745
1212	10.8333	16.4666	21.2333	23.0744	16.5746	22.7494	20.4745	28.2743	20.4745	20.1495
1213	11.05	16.2499	21.0166	23.0744	16.5746	22.4244	20.4745	27.2993	21.1245	19.8245
1214	10.8333	16.2499	21.0166	22.7494	16.5746	22.0994	20.1495	27.9493	20.4745	20.4745
1215	11.2666	16.2499	20.7999	22.7494	16.2496	22.0994	19.8245	27.6243	20.4745	19.8245
1216	10.8333	16.4666	21.2333	22.4244	16.5746	22.4244	20.1495	27.9493	20.4745	20.1495
1217	11.2666	16.2499	21.2333	22.7494	15.9246	22.0994	20.7995	27.6243	20.7995	19.8245
1218	10.8333	16.2499	21.0166	22.7494	15.9246	22.4244	20.4745	27.6243	20.7995	19.8245
1219	10.8333	16.0333	21.0166	22.7494	16.2496	22.4244	20.4745	27.6243	21.4495	20.7995
1220	10.8333	16.2499	20.7999	22.7494	15.9246	22.4244	20.1495	27.2993	20.7995	20.4745
1221	11.05	16.4666	20.7999	22.7494	15.9246	22.4244	20.1495	27.6243	21.7745	19.8245
1222	10.8333	16.2499	21.0166	23.0744	16.2496	22.4244	19.4995	27.6243	20.7995	20.1495
1223	11.2666	16.2499	21.0166	23.0744	15.9246	23.0744	20.4745	27.2993	21.1245	20.1495
1224	11.05	16.2499	20.7999	22.7494	16.5746	23.0744	20.4745	27.9493	20.4745	19.8245
1225	10.8333	16.4666	21.0166	22.7494	16.5746	22.7494	20.4745	26.9743	21.1245	19.8245
1226	11.05	16.4666	21.0166	22.7494	16.5746	22.7494	19.8245	27.6243	21.4495	20.1495
1227	10.8333	16.0333	21.0166	22.7494	16.2496	22.7494	20.7995	27.6243	20.4745	20.1495
1228	11.05	16.4666	20.5833	22.7494	16.5746	22.7494	20.1495	28.2743	21.1245	20.1495
1229	10.8333	16.4666	21.0166	23.0744	16.2496	23.0744	20.7995	27.6243	20.7995	20.1495
1230	10.8333	16.2499	21.0166	22.7494	16.5746	22.7494	20.1495	27.6243	20.1495	19.8245
1231	10.8333	16.6833	21.0166	23.0744	16.5746	22.7494	19.8245	27.9493	20.7995	20.4745
1232	11.2666	16.4666	21.0166	22.4244	16.5746	22.7494	20.1495	27.2993	21.1245	20.1495
1233	11.05	16.0333	21.0166	22.7494	15.9246	22.7494	20.1495	27.9493	20.4745	19.8245
1234	10.8333	16.2499	20.7999	22.7494	16.2496	22.4244	20.4745	27.9493	20.7995	20.1495
1235	11.05	16.2499	21.0166	23.0744	16.5746	22.4244	20.1495	27.2993	20.7995	20.1495
1236	11.05	16.4666	21.2333	22.7494	16.5746	22.7494	20.7995	27.9493	20.7995	19.8245
1237	11.05	16.2499	21.0166	22.7494	16.5746	22.7494	19.8245	27.6243	20.4745	20.1495
1238	10.4	16.4666	21.2333	22.7494	16.2496	23.0744	20.1495	28.2743	20.1495	19.8245
1239	10.8333	16.4666	21.2333	22.4244	16.2496	23.0744	20.7995	27.2993	20.4745	20.1495
1240	10.8333	16.4666	21.2333	22.4244	16.5746	22.7494	20.1495	27.6243	20.4745	20.1495
1241	10.6166	16.2499	20.7999	22.4244	16.2496	22.4244	20.1495	27.6243	20.7995	20.1495
1242	10.6166	16.0333	21.2333	22.7494	15.9246	22.7494	20.7995	27.6243	20.7995	20.1495
1243	11.05	16.2499	20.7999	22.7494	15.9246	22.4244	19.8245	27.9493	20.7995	20.4745
1244	10.8333	16.2499	20.7999	22.7494	16.5746	22.7494	20.4745	27.9493	20.1495	20.4745
1245	10.6166	16.2499	21.0166	22.7494	16.5746	22.7494	20.1495	27.6243	20.7995	20.1495
1246	11.2666	16.2499	21.0166	22.7494	16.5746	22.7494	19.8245	27.6243	20.4745	20.1495
1247	11.2666	16.4666	20.7999	22.7494	16.5746	22.4244	19.8245	27.2993	20.7995	20.1495
1248	10.6166	16.4666	21.0166	22.7494	16.5746	22.4244	19.8245	27.2993	21.1245	20.1495
1249	10.4	16.6833	20.7999	22.7494	16.2496	22.4244	19.4995	27.6243	20.7995	20.1495
1250	11.05	16.4666	21.2333	22.7494	16.5746	22.7494	19.8245	27.9493	20.4745	19.8245
1251	11.05	16.2499	21.0166	22.7494	16.2496	22.7494	20.4745	27.6243	21.1245	20.4745
1252	10.8333	16.2499	21.0166	22.7494	16.5746	22.0994	20.1495	27.9493	20.4745	20.4745
1253	10.8333	16.0333	20.7999	22.7494	16.2496	22.4244	20.1495	27.6243	21.1245	20.4745
1254	11.05	16.0333	21.0166	22.4244	16.2496	22.4244	20.1495	27.2993	20.7995	20.1495
1255	10.8333	16.4666	21.0166	22.4244	15.9246	22.7494	20.1495	27.6243	21.1245	20.1495
1256	11.05	16.4666	21.2333	22.7494	15.5996	22.7494	20.4745	27.6243	20.7995	20.4745
1257	10.8333	16.4666	21.0166	22.4244	15.9246	22.4244	20.1495	27.2993	21.1245	19.8245
1258	10.6166	16.4666	21.0166	22.4244	16.2496	22.0994	20.1495	27.6243	20.7995	20.4745
1259	11.2666	16.2499	21.2333	22.7494	16.2496	22.0994	20.1495	27.2993	21.4495	20.1495
1260	11.4833	16.4666	20.7999	22.7494	16.2496	22.4244	20.1495	27.9493	20.7995	20.1495
1261	11.05	16.6833	21.2333	22.4244	16.2496	22.0994	20.4745	27.9493	21.4495	20.1495
1262	11.4833	16.4666	21.0166	22.7494	16.5746	22.4244	19.8245	27.6243	21.1245	20.7995
1263	11.05	16.4666	21.0166	22.7494	16.2496	21.7745	20.7995	27.9493	21.1245	19.8245
1264	11.05	16.4666	21.0166	22.4244	16.2496	22.0994	19.8245	27.2993	21.1245	20.4745
1265	11.05	16.2499	21.0166	22.7494	16.5746	22.4244	20.1495	27.6243	21.4495	20.4745
1266	11.4833	16.2499	20.7999	22.7494	16.5746	22.4244	20.1495	27.6243	20.7995	20.1495
1267	11.05	16.4666	21.0166	22.7494	16.5746	22.0994	20.1495	27.2993	21.1245	20.4745
1268	11.05	16.4666	21.0166	22.7494	16.5746	22.0994	20.1495	27.2993	20.7995	20.7995
1269	11.05	16.2499	21.0166	22.4244	16.2496	21.7745	19.8245	27.2993	20.7995	20.7995
1270	11.05	16.4666	21.0166	22.4244	16.2496	22.0994	19.8245	27.6243	21.1245	20.1495
1271	11.05	16.4666	21.0166	22.4244	16.5746	22.4244	20.4745	27.6243	21.1245	20.4745
1272	11.2666	16.2499	21.0166	22.7494	16.5746	22.0994	20.1495	27.9493	21.7745	19.8245
1273	10.8333	16.4666	21.0166	22.7494	16.2496	22.0994	20.1495	27.2993	20.7995	20.1495
1274	11.05	16.4666	21.0166	22.7494	16.2496	22.4244	20.4745	27.2993	21.1245	20.4745
1275	11.2666	16.2499	21.0166	22.7494	16.5746	21.7745	20.1495	27.6243	20.7995	20.4745
1276	11.05	16.2499	21.0166	22.7494	16.2496	22.0994	20.4745	27.2993	21.4495	20.1495
1277	10.8333	16.2499	21.0166	22.7494	16.2496	21.7745	20.1495	27.9493	21.1245	20.1495
1278	10.6166	16.2499	20.7999	22.7494	16.2496	22.0994	20.1495	27.9493	20.7995	20.1495
1279	10.8333	16.2499	20.7999	22.4244	15.9246	22.0994	20.1495	27.9493	21.1245	20.1495
1280	10.8333	16.2499	21.0166	22.7494	16.5746	22.0994	20.1495	27.6243	20.7995	20.4745
1281	11.05	16.2499	21.0166	22.7494	16.2496	22.0994	20.1495	27.2993	20.7995	20.4745
1282	10.4	16.2499	21.0166	22.7494	16.5746	22.4244	20.1495	27.6243	21.1245	20.1495
1283	10.8333	16.4666	21.2333	22.7494	16.2496	22.4244	20.1495	27.6243	21.1245	20.4745
1284	11.05	16.0333	21.2333	22.7494	16.2496	21.7745	20.1495	27.6243	20.7995	20.4745
1285	11.05	16.2499	20.7999	22.7494	16.2496	22.0994	20.1495	26.9743	21.1245	20.4745
1286	11.05	16.0333	20.7999	22.7494	16.2496	22.0994	20.1495	27.6243	20.1495	20.4745
1287	11.2666	16.2499	20.7999	22.7494	16.2496	21.7745	20.1495	27.2993	21.4495	20.4745
1288	11.2666	16.4666	21.0166	22.4244	16.2496	22.4244	20.1495	27.9493	21.4495	20.1495
1289	11.2666	16.2499	21.0166	22.7494	16.5746	22.0994	20.4745	27.2993	21.1245	20.1495
1290	11.2666	16.2499	20.7999	22.7494	16.2496	22.4244	20.4745	27.6243	20.1495	20.4745
1291	11.2666	16.2499	21.0166	22.4244	16.2496	22.0994	20.4745	27.6243	21.4495	20.4745
1292	10.6166	16.2499	21.2333	22.4244	16.2496	22.0994	20.1495	27.6243	20.7995	20.4745
1293	11.2666	16.2499	21.0166	22.7494	16.2496	22.4244	20.4745	27.6243	21.1245	20.1495
1294	11.05	16.4666	21.0166	22.4244	16.2496	22.0994	19.8245	27.9493	21.7745	20.1495
1295	11.2666	16.2499	21.0166	22.7494	16.2496	22.0994	20.7995	27.9493	20.7995	20.4745
1296	11.05	16.2499	21.0166	22.7494	16.2496	22.4244	20.4745	27.6243	21.1245	20.4745
1297	10.6166	16.4666	21.0166	22.7494	16.2496	22.4244	20.1495	27.6243	21.1245	20.4745
1298	11.2666	16.2499	21.0166	22.4244	16.2496	21.7745	20.1495	27.6243	21.1245	20.1495
1299	11.2666	16.2499	21.2333	22.4244	16.2496	21.7745	20.1495	27.2993	21.4495	20.1495
1300	11.2666	16.4666	21.0166	22.7494	15.9246	21.7745	20.1495	27.9493	21.1245	20.4745
1301	10.6166	16.2499	21.0166	22.7494	16.2496	22.4244	20.4745	27.9493	21.1245	20.1495
1302	11.2666	16.0333	21.2333	22.7494	16.2496	22.0994	19.8245	27.2993	21.1245	20.1495
1303	11.05	16.4666	21.0166	22.7494	16.2496	21.7745	20.1495	27.2993	20.4745	20.1495
1304	10.8333	16.4666	21.0166	22.4244	16.2496	22.0994	20.7995	27.6243	20.7995	20.7995
1305	11.2666	16.4666	21.0166	22.7494	16.2496	22.0994	20.1495	27.6243	20.4745	20.1495
1306	11.05	16.2499	20.7999	22.4244	16.2496	21.7745	19.4995	27.9493	20.4745	20.1495
1307	11.2666	16.4666	21.0166	22.4244	15.9246	22.4244	20.1495	27.6243	20.7995	20.1495
1308	10.8333	16.4666	21.0166	22.7494	16.2496	22.4244	20.1495	27.9493	21.1245	20.4745
1309	10.8333	16.4666	21.0166	22.4244	16.2496	21.7745	20.1495	27.9493	21.1245	20.1495
1310	11.2666	16.4666	21.0166	22.4244	15.9246	21.7745	20.7995	27.6243	20.7995	20.1495
1311	10.8333	16.0333	21.0166	22.7494	15.9246	21.7745	19.8245	27.9493	20.4745	20.1495
1312	10.8333	16.2499	21.0166	22.7494	16.2496	22.0994	20.1495	27.6243	21.1245	20.1495
1313	11.05	16.2499	21.2333	22.4244	15.9246	21.7745	20.4745	27.6243	21.1245	20.1495
1314	11.2666	16.0333	21.0166	22.4244	16.2496	21.4495	20.1495	28.2743	20.1495	20.1495
1315	10.6166	16.4666	21.0166	22.4244	16.2496	21.4495	20.1495	27.2993	20.7995	20.4745
1316	11.05	16.2499	20.7999	22.7494	15.9246	21.1245	20.1495	27.6243	21.1245	20.1495
1317	11.05	16.2499	21.2333	22.0994	16.2496	21.7745	20.1495	27.6243	21.1245	20.1495
1318	11.2666	16.2499	21.0166	22.7494	15.9246	21.7745	20.1495	28.2743	20.1495	20.1495
1319	10.8333	16.2499	21.0166	22.7494	16.2496	22.0994	20.1495	27.9493	20.7995	20.7995
1320	10.8333	16.2499	21.0166	22.4244	16.2496	21.7745	19.4995	27.2993	20.7995	20.4745
1321	11.05	16.2499	21.0166	22.7494	15.5996	21.7745	20.1495	27.9493	21.1245	20.4745
1322	10.4	16.2499	21.0166	22.4244	15.9246	21.7745	20.1495	27.9493	21.4495	20.1495
1323	11.05	16.0333	21.2333	22.7494	16.2496	22.4244	19.8245	27.6243	21.1245	20.4745
1324	10.8333	16.4666	21.0166	22.7494	16.2496	22.0994	20.4745	27.9493	21.1245	20.4745
1325	10.4	16.2499	21.0166	23.0744	16.2496	21.7745	20.4745	27.9493	21.4495	20.1495
1326	11.05	16.2499	21.2333	22.4244	15.9246	21.7745	20.1495	27.2993	20.4745	20.4745
1327	11.2666	16.0333	21.0166	22.4244	15.9246	21.7745	20.1495	27.2993	20.7995	20.1495
1328	10.8333	16.2499	21.2333	22.4244	16.2496	21.7745	20.4745	27.9493	20.7995	20.1495
1329	11.05	16.0333	21.2333	22.7494	15.9246	22.0994	20.4745	27.9493	21.4495	20.4745
1330	11.05	16.2499	21.2333	22.7494	16.2496	21.7745	20.1495	27.2993	20.4745	20.4745
1331	11.05	16.2499	21.2333	22.7494	16.2496	21.7745	20.1495	27.2993	21.1245	20.4745
1332	10.6166	15.8166	21.0166	22.7494	15.9246	21.4495	20.4745	27.6243	21.1245	20.4745
1333	11.05	16.2499	21.0166	22.7494	16.2496	22.0994	20.4745	28.2743	20.7995	20.1495
1334	11.05	16.4666	21.0166	22.4244	16.2496	21.7745	20.1495	27.6243	21.4495	20.4745
1335	11.05	16.2499	21.4499	22.7494	15.9246	21.7745	20.1495	27.6243	21.1245	20.4745
1336	10.8333	16.0333	21.0166	22.7494	16.2496	21.7745	20.4745	27.6243	21.1245	20.1495
1337	11.05	16.2499	21.0166	22.7494	16.5746	21.7745	20.1495	27.6243	21.7745	20.1495
1338	11.05	16.4666	21.2333	22.7494	15.9246	21.4495	20.4745	27.9493	21.1245	20.4745
1339	10.4	16.0333	21.4499	22.4244	15.9246	21.7745	20.4745	27.6243	20.7995	20.4745
1340	11.4833	16.0333	21.0166	22.7494	16.2496	21.7745	20.1495	27.6243	20.7995	20.4745
1341	11.2666	16.2499	21.0166	22.4244	16.2496	22.0994	20.1495	27.6243	20.7995	20.1495
1342	11.05	16.2499	21.2333	22.7494	16.2496	21.7745	20.4745	27.9493	20.7995	19.8245
1343	11.4833	16.4666	21.2333	22.7494	16.2496	22.0994	20.4745	27.6243	21.4495	20.1495
1344	11.2666	16.2499	21.0166	22.7494	15.9246	21.7745	20.7995	27.6243	20.7995	20.1495
1345	10.8333	16.4666	21.0166	22.7494	15.5996	22.0994	20.7995	28.2743	20.7995	20.1495
1346	10.6166	16.0333	21.0166	22.7494	16.2496	22.0994	20.1495	27.9493	20.4745	20.1495
1347	11.05	16.4666	21.2333	22.7494	15.9246	22.0994	19.4995	27.6243	20.7995	20.1495
1348	11.05	16.4666	21.2333	22.7494	16.2496	22.4244	20.4745	27.9493	21.1245	20.1495
1349	10.8333	16.4666	21.0166	23.0744	16.2496	22.0994	20.1495	27.6243	20.4745	20.1495
1350	11.05	16.2499	21.4499	23.0744	16.5746	22.0994	20.1495	27.2993	20.1495	20.1495
1351	11.05	16.4666	21.0166	23.0744	16.5746	22.4244	20.4745	27.6243	21.1245	20.7995
1352	11.05	16.4666	21.4499	23.0744	16.2496	22.0994	20.4745	27.6243	20.1495	20.1495
1353	10.8333	16.2499	21.0166	23.0744	16.2496	22.0994	20.1495	27.6243	21.1245	20.1495
1354	11.05	16.2499	21.2333	23.0744	16.5746	22.0994	20.1495	27.6243	20.7995	20.1495
1355	10.8333	16.0333	21.2333	23.0744	16.2496	22.4244	20.4745	27.9493	20.4745	19.8245
1356	11.2666	16.2499	21.2333	23.0744	16.5746	22.4244	20.4745	27.6243	20.4745	20.1495
1357	11.05	16.2499	21.2333	23.0744	16.2496	22.0994	20.4745	27.9493	20.4745	20.4745
1358	11.2666	16.2499	21.4499	22.7494	16.2496	22.4244	19.8245	27.6243	20.7995	19.8245
1359	11.2666	16.2499	21.4499	23.0744	16.2496	22.0994	19.8245	27.9493	21.4495	20.1495
1360	10.6166	16.0333	21.2333	23.0744	15.9246	22.4244	20.1495	27.6243	21.1245	20.1495
1361	11.05	16.2499	21.4499	23.0744	15.9246	22.4244	20.4745	27.2993	19.8245	20.1495
1362	11.05	16.2499	21.2333	23.0744	16.2496	22.7494	20.1495	27.6243	20.7995	20.1495
1363	11.05	16.4666	21.2333	23.0744	16.2496	22.7494	20.1495	27.9493	20.1495	19.8245
1364	11.05	16.2499	21.2333	23.0744	16.2496	22.7494	20.4745	27.6243	20.4745	20.1495
1365	11.2666	16.4666	21.4499	23.0744	16.2496	22.0994	20.1495	27.6243	20.4745	19.8245
1366	11.2666	16.2499	21.2333	23.0744	15.9246	22.4244	19.8245	27.6243	20.4745	20.1495
1367	11.2666	16.2499	21.2333	23.0744	16.2496	22.7494	20.1495	27.9493	20.4745	20.1495
1368	10.8333	16.6833	21.2333	23.0744	16.2496	22.7494	20.1495	27.9493	20.4745	20.1495
1369	11.2666	16.2499	21.4499	23.0744	15.9246	22.4244	19.8245	27.6243	21.1245	20.1495
1370	10.4	16.2499	21.2333	23.0744	16.5746	23.0744	20.1495	27.9493	20.7995	20.1495
1371	11.05	16.2499	21.4499	22.7494	16.5746	22.7494	20.1495	27.6243	20.4745	20.1495
1372	11.2666	16.2499	21.2333	23.0744	16.2496	22.7494	20.4745	27.9493	21.1245	20.1495
1373	10.8333	16.2499	21.2333	23.0744	16.5746	22.7494	20.1495	27.9493	20.7995	20.4745
1374	11.05	16.2499	21.2333	23.0744	16.2496	22.7494	20.1495	27.6243	20.4745	19.8245
1375	11.05	16.2499	21.0166	23.0744	15.9246	22.7494	20.1495	27.2993	20.7995	20.1495
1376	11.05	16.2499	21.2333	23.0744	16.2496	22.7494	20.1495	27.9493	20.7995	20.1495
1377	10.8333	16.0333	21.2333	23.0744	15.9246	22.4244	20.4745	27.6243	21.4495	19.8245
1378	10.8333	16.2499	21.4499	23.0744	16.2496	22.7494	20.4745	28.2743	20.1495	20.1495
1379	11.2666	16.2499	21.2333	23.0744	16.2496	22.7494	20.4745	27.6243	21.4495	20.1495
1380	10.8333	16.2499	21.4499	23.0744	16.2496	22.4244	20.1495	27.9493	20.4745	20.1495
1381	11.05	16.2499	21.2333	23.0744	16.2496	22.7494	20.1495	28.2743	21.4495	20.1495
1382	10.8333	16.2499	21.4499	23.0744	15.9246	22.7494	20.4745	27.6243	20.7995	20.1495
1383	11.4833	16.2499	21.2333	23.0744	16.2496	22.7494	20.1495	27.9493	20.7995	20.1495
1384	10.4	16.2499	21.0166	23.0744	16.2496	22.4244	19.8245	27.6243	20.1495	20.1495
1385	10.6166	16.4666	21.0166	23.0744	16.2496	22.4244	19.8245	26.9743	20.4745	20.1495
1386	10.8333	16.2499	21.2333	23.0744	16.2496	22.7494	20.1495	27.6243	20.1495	20.1495
1387	10.8333	16.2499	21.0166	23.0744	16.2496	22.7494	19.8245	27.6243	20.4745	20.1495
1388	10.1833	16.0333	21.4499	23.0744	16.8996	22.7494	20.1495	27.6243	21.1245	20.4745
1389	10.6166	16.2499	21.2333	23.0744	16.8996	22.4244	19.8245	27.9493	21.1245	20.1495
1390	11.05	16.2499	21.0166	23.0744	16.5746	22.7494	20.1495	27.6243	21.7745	20.4745
1391	10.6166	16.2499	20.7999	23.0744	16.5746	22.4244	19.8245	28.2743	20.4745	20.1495
1392	11.05	16.2499	21.2333	23.0744	16.5746	22.7494	20.1495	27.6243	21.7745	20.1495
1393	11.05	16.2499	21.2333	23.0744	16.2496	22.7494	20.1495	27.9493	21.1245	20.4745
1394	11.2666	16.2499	21.0166	23.0744	16.5746	22.7494	20.4745	27.2993	21.7745	20.1495
1395	11.4833	16.4666	21.0166	23.0744	16.2496	22.7494	20.1495	27.6243	20.1495	20.1495
1396	10.8333	16.4666	21.2333	23.0744	15.9246	22.4244	20.4745	27.9493	21.4495	20.1495
1397	11.05	16.0333	21.0166	23.0744	16.5746	22.4244	19.8245	27.9493	22.0994	20.7995
1398	11.05	16.0333	20.7999	23.0744	16.8996	22.7494	20.7995	27.9493	21.7745	20.1495
1399	10.8333	16.4666	20.7999	23.0744	16.2496	22.4244	20.4745	27.2993	20.7995	20.1495
1400	11.05	16.2499	20.7999	23.0744	16.5746	22.7494	20.4745	28.2743	21.1245	20.4745
1401	11.2666	16.2499	21.0166	22.7494	16.5746	22.0994	19.8245	27.6243	21.1245	19.8245
1402	11.2666	16.2499	21.0166	22.7494	16.8996	22.4244	19.8245	27.6243	21.1245	20.1495
1403	11.05	15.8166	20.7999	23.0744	16.8996	22.7494	20.4745	27.6243	21.7745	20.4745
1404	10.8333	16.0333	20.7999	22.7494	16.5746	22.4244	19.8245	27.6243	21.4495	20.1495
1405	10.8333	16.0333	21.0166	22.7494	16.8996	22.7494	20.1495	28.5993	21.7745	20.1495
1406	11.4833	16.2499	20.7999	23.0744	16.5746	22.4244	19.8245	27.6243	22.0994	19.8245
1407	11.05	16.2499	21.0166	23.0744	16.5746	22.4244	20.1495	27.2993	21.1245	20.4745
1408	11.2666	16.2499	20.7999	23.0744	16.8996	22.4244	20.1495	28.2743	21.4495	20.4745
1409	11.4833	16.4666	21.0166	22.7494	16.8996	22.4244	20.1495	27.9493	21.1245	19.8245
1410	10.8333	16.2499	20.7999	23.0744	16.5746	22.4244	20.4745	27.6243	21.4495	20.1495
1411	11.4833	16.4666	21.0166	23.0744	16.2496	22.4244	20.4745	27.9493	21.1245	19.8245
1412	11.05	16.4666	20.7999	23.0744	16.5746	21.7745	19.8245	28.2743	20.7995	20.1495
1413	10.8333	16.4666	21.0166	23.0744	16.5746	22.0994	19.8245	27.9493	21.7745	20.1495
1414	10.6166	16.2499	21.2333	23.0744	16.5746	22.4244	20.1495	27.9493	22.4244	19.8245
1415	11.2666	16.4666	21.0166	22.7494	16.5746	22.7494	20.7995	28.2743	21.4495	19.8245
1416	11.05	16.4666	21.2333	23.0744	16.8996	22.4244	20.1495	27.9493	21.7745	20.1495
1417	10.8333	16.0333	20.7999	23.0744	16.5746	22.4244	19.8245	28.2743	21.7745	20.1495
1418	10.4	16.4666	21.0166	23.0744	16.5746	22.4244	19.8245	27.9493	21.4495	20.4745
1419	10.8333	16.4666	20.7999	23.0744	16.2496	22.4244	19.8245	27.9493	21.7745	20.4745
1420	10.6166	16.4666	21.0166	23.0744	16.2496	22.4244	19.4995	28.2743	21.4495	20.1495
1421	11.05	16.0333	21.2333	23.0744	16.2496	22.4244	20.4745	27.9493	22.0994	20.1495
1422	10.8333	16.0333	21.2333	23.0744	16.5746	21.7745	19.1745	27.6243	21.7745	19.8245
1423	11.05	16.4666	21.0166	23.0744	17.2246	22.4244	19.8245	27.9493	21.7745	20.1495
1424	10.8333	16.4666	21.0166	23.0744	16.5746	22.4244	20.1495	28.2743	21.7745	20.1495
1425	10.6166	16.2499	21.2333	23.0744	16.5746	21.7745	20.4745	27.6243	21.4495	19.8245
1426	11.2666	16.4666	21.2333	22.7494	16.5746	22.4244	19.8245	28.2743	19.8245	20.1495
1427	10.8333	16.2499	21.2333	23.0744	17.2246	22.4244	20.4745	27.2993	20.7995	19.8245
1428	10.8333	16.4666	21.0166	23.0744	17.2246	22.4244	19.8245	27.6243	20.1495	20.1495
1429	10.8333	16.4666	21.2333	22.7494	16.5746	22.0994	20.1495	28.5993	21.7745	20.1495
1430	11.05	16.2499	20.7999	23.0744	16.5746	22.0994	20.1495	28.5993	20.1495	20.4745
1431	10.4	16.2499	21.0166	23.0744	16.5746	22.7494	20.1495	27.9493	20.7995	20.1495
1432	11.05	16.6833	21.0166	23.0744	16.5746	22.0994	20.4745	27.6243	20.4745	20.1495
1433	11.2666	16.2499	21.2333	23.0744	16.2496	22.4244	20.4745	28.2743	21.1245	20.1495
1434	10.8333	16.2499	20.7999	23.0744	16.5746	22.4244	20.1495	27.6243	21.1245	19.8245
1435	10.8333	16.4666	21.0166	23.0744	16.5746	22.4244	20.1495	27.9493	20.7995	20.4745
1436	10.1833	16.4666	21.0166	23.0744	16.5746	22.4244	20.4745	28.2743	20.7995	20.4745
1437	10.6166	16.2499	21.0166	22.7494	16.2496	22.0994	20.1495	28.5993	21.1245	19.8245
1438	10.6166	16.0333	21.0166	23.0744	16.5746	22.4244	20.1495	28.5993	21.4495	20.1495
1439	10.6166	16.2499	21.0166	23.0744	16.2496	22.4244	20.1495	27.2993	20.7995	19.8245
1440	10.8333	16.4666	21.0166	23.0744	16.5746	22.0994	19.8245	27.9493	21.7745	19.8245
1441	10.8333	16.2499	21.2333	23.0744	16.5746	22.7494	20.1495	28.2743	21.4495	19.8245
1442	11.05	16.2499	21.0166	23.0744	16.2496	22.4244	20.1495	27.9493	21.7745	19.8245
1443	10.8333	16.0333	21.0166	23.0744	16.2496	22.4244	20.1495	27.9493	21.1245	20.1495
1444	10.6166	16.2499	21.0166	22.7494	16.8996	22.4244	20.1495	26.9743	21.7745	19.8245
1445	10.4	16.2499	21.2333	23.0744	16.2496	22.7494	20.4745	28.2743	21.1245	19.8245
1446	11.2666	16.2499	21.0166	23.0744	16.5746	22.7494	19.8245	27.9493	20.7995	20.1495
1447	11.2666	16.4666	21.2333	23.0744	16.5746	22.7494	19.8245	28.2743	21.7745	20.1495
1448	10.8333	16.2499	21.0166	23.0744	16.8996	22.7494	19.8245	27.6243	22.0994	19.4995
1449	11.05	16.4666	21.2333	23.0744	16.8996	22.4244	20.1495	27.2993	21.4495	19.8245
1450	11.05	16.4666	21.0166	23.0744	16.5746	22.7494	20.4745	28.2743	21.1245	19.8245
1451	11.05	16.4666	21.2333	23.0744	17.2246	22.7494	20.4745	27.9493	21.7745	20.1495
1452	10.4	16.2499	21.0166	23.0744	16.5746	22.4244	20.4745	28.2743	21.7745	20.1495
1453	10.8333	16.4666	21.0166	23.0744	16.5746	22.7494	20.1495	27.9493	21.1245	20.1495
1454	11.4833	16.0333	21.0166	23.0744	16.5746	22.7494	19.8245	28.5993	21.4495	20.1495
1455	10.8333	16.2499	21.0166	23.0744	16.2496	22.7494	20.7995	28.5993	22.0994	20.4745
1456	10.4	16.2499	21.0166	22.7494	16.2496	22.4244	20.7995	28.2743	21.4495	20.1495
1457	11.2666	15.8166	21.0166	23.0744	16.2496	22.4244	20.4745	27.9493	21.1245	19.8245
1458	11.05	16.0333	21.0166	22.7494	16.5746	22.0994	20.1495	27.6243	21.4495	20.1495
1459	10.6166	16.2499	21.2333	23.0744	16.5746	22.4244	19.4995	27.9493	21.7745	20.1495
1460	10.6166	16.2499	21.0166	23.0744	16.5746	22.4244	19.8245	28.5993	21.1245	20.1495
1461	10.8333	16.0333	21.0166	23.0744	16.5746	22.4244	20.4745	28.2743	21.1245	20.1495
1462	10.8333	16.2499	21.2333	23.0744	16.8996	22.0994	20.1495	27.9493	21.4495	19.8245
1463	11.05	16.0333	21.0166	22.7494	16.8996	22.4244	20.1495	27.9493	20.7995	20.4745
1464	11.2666	15.8166	21.2333	23.0744	16.5746	22.0994	20.4745	27.9493	21.1245	20.4745
1465	11.05	16.0333	20.7999	22.7494	16.5746	22.4244	20.1495	27.6243	21.4495	20.1495
1466	10.1833	16.0333	21.0166	22.7494	16.8996	22.0994	20.4745	27.9493	21.4495	19.8245
1467	11.05	16.2499	20.7999	23.0744	16.5746	22.0994	20.1495	27.6243	21.4495	20.1495
1468	11.2666	16.2499	21.0166	23.0744	16.5746	22.4244	20.1495	28.2743	21.7745	20.1495
1469	11.05	16.4666	21.2333	23.0744	16.5746	22.4244	20.4745	27.9493	21.7745	19.8245
1470	11.05	16.0333	21.2333	23.0744	16.2496	22.4244	20.1495	28.2743	21.1245	20.1495
1471	10.8333	16.2499	20.7999	23.0744	16.5746	22.7494	19.8245	27.9493	21.7745	20.4745
1472	10.8333	16.0333	20.7999	22.7494	16.5746	22.4244	19.4995	27.9493	21.4495	20.1495
1473	11.05	16.2499	20.5833	23.0744	16.5746	22.4244	20.4745	27.9493	21.4495	19.8245
1474	10.8333	16.0333	21.0166	23.0744	16.5746	22.7494	20.1495	27.6243	21.4495	19.8245
1475	10.8333	16.0333	20.7999	23.0744	16.8996	22.0994	20.4745	27.9493	21.4495	19.8245
1476	10.1833	16.0333	21.4499	22.4244	16.8996	21.7745	20.1495	27.9493	21.1245	19.8245
1477	10.6166	16.0333	21.2333	23.0744	16.5746	23.0744	19.8245	27.9493	21.1245	19.8245
1478	10.6166	16.0333	21.2333	22.7494	16.8996	22.0994	20.1495	27.9493	21.4495	20.1495
1479	10.8333	16.0333	21.0166	22.4244	16.8996	22.4244	20.4745	27.9493	21.4495	20.1495
1480	11.05	16.0333	21.2333	23.0744	16.8996	22.7494	20.1495	27.6243	21.4495	19.8245
1481	11.05	15.8166	20.7999	23.0744	16.8996	22.4244	20.4745	27.6243	21.4495	20.4745
1482	11.2666	16.2499	21.2333	23.0744	16.5746	22.4244	19.8245	27.6243	21.4495	20.1495
1483	10.6166	16.0333	21.0166	23.0744	16.5746	22.7494	20.1495	27.9493	21.1245	20.1495
1484	10.4	16.0333	21.2333	22.7494	16.8996	22.7494	19.8245	27.2993	21.4495	20.1495
1485	10.6166	16.0333	20.7999	23.0744	16.8996	22.4244	20.4745	27.6243	21.4495	19.8245
1486	10.6166	16.0333	21.0166	23.0744	16.5746	22.7494	20.1495	27.9493	20.7995	19.8245
1487	10.8333	16.0333	21.2333	23.0744	16.8996	22.0994	19.8245	27.9493	21.7745	19.8245
1488	10.6166	16.2499	21.0166	23.0744	17.2246	22.4244	20.1495	27.9493	20.7995	19.8245
1489	10.1833	16.0333	21.2333	23.0744	16.8996	22.4244	20.1495	27.9493	20.7995	20.1495
1490	10.4	16.0333	21.4499	23.0744	16.5746	22.0994	20.1495	27.9493	21.1245	20.1495
1491	10.8333	16.0333	21.0166	23.0744	16.5746	22.0994	19.8245	28.5993	21.1245	20.1495
1492	10.6166	16.0333	21.0166	22.7494	16.8996	22.0994	20.1495	27.9493	21.7745	20.1495
1493	11.05	15.8166	21.2333	23.0744	16.8996	22.4244	19.8245	27.2993	21.1245	19.8245
1494	11.2666	16.2499	20.7999	23.0744	16.8996	22.7494	19.8245	27.6243	21.1245	20.4745
1495	10.1833	16.4666	21.0166	23.0744	16.8996	22.4244	20.1495	27.6243	20.7995	20.7995
1496	11.05	16.2499	21.0166	23.0744	16.8996	22.7494	20.1495	27.9493	21.4495	20.1495
1497	10.4	16.2499	21.2333	22.7494	16.5746	22.4244	19.8245	28.2743	21.4495	20.1495
1498	11.05	16.0333	21.0166	23.0744	17.2246	22.4244	20.4745	27.6243	21.4495	20.4745
1499	11.05	16.0333	20.7999	22.7494	17.2246	22.7494	20.1495	27.6243	21.1245	20.1495
1500	10.6166	16.0333	21.4499	23.0744	17.2246	22.7494	19.8245	27.9493	22.0994	20.1495
1501	11.05	16.2499	21.0166	23.0744	16.5746	22.7494	20.1495	27.9493	22.4244	20.4745
1502	11.05	16.2499	21.2333	23.0744	16.2496	22.4244	19.8245	27.6243	21.7745	20.4745
1503	10.8333	15.8166	21.0166	23.0744	16.5746	22.0994	20.1495	27.6243	22.0994	19.8245
1504	10.8333	16.0333	21.2333	23.0744	17.2246	22.4244	20.4745	27.9493	20.4745	19.8245
1505	10.8333	16.0333	21.2333	23.0744	17.2246	22.7494	20.1495	27.9493	22.4244	20.4745
1506	10.8333	16.2499	20.7999	23.0744	16.8996	22.4244	19.4995	27.2993	21.7745	20.1495
1507	11.05	15.8166	21.0166	23.0744	16.8996	22.7494	20.1495	27.9493	22.0994	20.4745
1508	10.8333	16.2499	21.0166	23.0744	16.5746	22.4244	19.8245	27.9493	22.0994	20.4745
1509	10.1833	15.8166	20.7999	23.0744	16.5746	22.7494	19.8245	27.9493	22.0994	20.4745
1510	11.2666	15.8166	21.2333	23.0744	16.5746	22.0994	20.1495	27.6243	21.7745	20.1495
1511	11.7	16.2499	21.2333	23.0744	16.5746	22.7494	19.8245	27.6243	22.4244	20.4745
1512	10.8333	16.2499	21.2333	22.7494	16.5746	22.0994	19.4995	27.9493	22.0994	20.4745
1513	10.8333	16.2499	21.0166	23.0744	16.5746	22.4244	20.1495	28.2743	22.0994	19.8245
1514	10.8333	16.0333	21.4499	23.0744	16.8996	22.0994	19.4995	27.9493	22.4244	19.8245
1515	10.4	16.0333	21.2333	23.0744	16.5746	22.0994	19.4995	28.2743	22.0994	20.1495
1516	10.8333	15.8166	21.4499	23.0744	16.8996	22.0994	19.8245	28.2743	22.4244	20.1495
1517	10.8333	16.0333	21.2333	23.0744	16.2496	22.0994	19.8245	28.5993	22.0994	20.1495
1518	10.8333	16.2499	21.2333	23.0744	16.5746	22.4244	19.8245	27.9493	22.0994	20.1495
1519	10.8333	16.2499	21.0166	23.0744	16.2496	22.0994	19.8245	27.9493	22.0994	20.1495
1520	10.6166	16.2499	21.2333	22.7494	16.5746	22.4244	20.1495	27.9493	22.4244	19.8245
1521	11.05	15.8166	21.2333	23.0744	16.5746	22.4244	20.1495	27.9493	22.4244	20.1495
1522	10.1833	16.2499	21.2333	23.0744	15.9246	22.0994	20.1495	27.9493	22.0994	20.1495
1523	11.05	15.8166	21.2333	22.7494	16.5746	21.7745	19.4995	27.9493	22.4244	19.8245
1524	11.2666	15.8166	21.2333	23.0744	16.2496	21.7745	20.1495	27.6243	22.0994	19.8245
1525	11.05	16.0333	21.2333	23.0744	16.5746	21.7745	20.4745	27.9493	22.0994	19.8245
1526	10.1833	16.0333	21.4499	22.7494	16.5746	22.0994	19.8245	27.6243	22.0994	19.8245
1527	10.6166	16.0333	21.2333	23.0744	16.2496	21.7745	20.1495	27.9493	22.0994	20.1495
1528	11.2666	16.0333	21.2333	23.0744	15.9246	22.4244	19.4995	27.9493	22.0994	20.1495
1529	10.6166	15.8166	21.2333	23.0744	16.8996	22.0994	19.8245	28.2743	22.0994	20.1495
1530	10.8333	16.0333	21.2333	23.0744	15.9246	22.4244	19.8245	27.9493	22.4244	19.8245
1531	10.6166	16.0333	21.2333	23.3994	16.2496	22.4244	20.4745	27.9493	22.0994	20.1495
1532	11.2666	16.0333	21.2333	23.0744	16.2496	22.4244	20.1495	27.9493	22.4244	20.1495
1533	11.2666	16.0333	21.2333	23.0744	16.2496	22.7494	20.4745	27.6243	22.4244	20.1495
1534	11.05	16.0333	21.2333	23.3994	16.5746	22.0994	20.1495	28.5993	22.0994	20.1495
1535	11.2666	16.2499	21.0166	23.3994	16.5746	22.4244	19.8245	28.5993	22.0994	20.1495
1536	11.05	16.0333	21.0166	23.3994	16.2496	22.7494	19.8245	28.2743	22.4244	20.4745
1537	11.05	16.0333	21.2333	23.0744	16.5746	22.7494	20.4745	27.9493	22.0994	20.1495
1538	10.8333	16.0333	20.7999	23.0744	16.5746	22.4244	20.4745	27.9493	22.0994	20.1495
1539	10.8333	16.0333	21.0166	23.3994	16.2496	21.7745	19.8245	28.2743	22.0994	20.1495
1540	10.8333	16.0333	20.7999	23.3994	16.2496	22.0994	20.4745	27.9493	22.4244	20.1495
1541	11.2666	16.0333	21.2333	23.3994	16.2496	22.0994	19.8245	27.9493	22.0994	20.4745
1542	10.6166	16.0333	21.2333	23.0744	15.9246	22.0994	19.8245	27.9493	22.0994	20.1495
1543	10.4	16.0333	21.0166	23.3994	16.5746	22.7494	20.1495	28.2743	22.4244	20.1495
1544	10.6166	16.0333	21.0166	23.3994	15.9246	22.4244	19.8245	27.6243	22.0994	20.1495
1545	11.05	16.2499	21.0166	23.3994	15.9246	22.0994	20.4745	27.9493	22.0994	20.1495
1546	11.2666	16.0333	21.0166	23.3994	16.2496	22.0994	20.4745	28.5993	22.0994	19.8245
1547	10.4	16.0333	21.0166	23.3994	16.2496	22.0994	20.4745	27.9493	22.0994	20.1495
1548	11.2666	16.0333	20.5833	23.3994	16.2496	22.4244	20.1495	27.9493	22.0994	19.8245
1549	10.8333	16.0333	21.0166	23.3994	15.9246	22.0994	19.8245	27.9493	22.0994	19.8245
1550	10.8333	16.0333	21.0166	23.3994	15.9246	21.7745	20.1495	27.9493	21.7745	19.8245
1551	10.6166	16.0333	21.2333	23.0744	15.9246	22.0994	20.1495	27.6243	22.0994	19.8245
1552	10.4	16.0333	20.5833	23.3994	16.5746	22.4244	19.4995	28.2743	22.0994	20.4745
1553	10.4	15.5999	20.7999	23.3994	15.9246	22.0994	20.1495	27.9493	21.7745	20.4745
1554	11.4833	16.0333	20.7999	23.0744	15.9246	22.4244	20.4745	27.9493	22.0994	20.1495
1555	11.2666	16.0333	20.5833	23.3994	15.9246	22.4244	20.1495	27.6243	22.0994	20.1495
1556	10.6166	16.2499	20.7999	23.3994	15.5996	22.4244	19.8245	28.9243	22.4244	19.8245
1557	11.2666	16.0333	20.7999	23.3994	15.9246	22.4244	20.1495	28.2743	22.0994	20.1495
1558	11.2666	16.2499	20.5833	23.0744	16.2496	22.0994	20.7995	27.9493	22.0994	20.1495
1559	10.8333	16.0333	21.0166	23.3994	15.9246	22.0994	20.1495	27.6243	22.0994	20.1495
1560	10.8333	16.0333	20.7999	23.0744	15.5996	21.7745	19.4995	28.2743	22.4244	20.1495
1561	10.8333	16.0333	20.7999	23.3994	15.9246	21.7745	19.8245	27.6243	22.4244	20.1495
1562	11.4833	16.2499	20.7999	23.0744	15.9246	22.0994	20.4745	28.2743	22.0994	19.8245
1563	11.05	16.0333	20.7999	23.0744	15.9246	21.7745	20.4745	28.2743	22.0994	20.1495
1564	11.2666	16.0333	20.7999	23.3994	16.2496	22.0994	20.4745	28.2743	22.0994	19.8245
1565	10.6166	16.0333	20.7999	23.0744	16.2496	22.0994	20.4745	28.2743	22.0994	19.8245
1566	11.2666	16.0333	20.7999	23.3994	16.2496	21.7745	20.4745	27.9493	22.0994	20.1495
1567	10.4	16.0333	20.7999	23.0744	15.2746	22.4244	20.4745	27.9493	22.0994	20.1495
1568	10.8333	16.0333	21.0166	23.0744	15.5996	22.0994	19.8245	27.9493	22.0994	20.1495
1569	11.4833	16.0333	20.7999	23.3994	15.9246	22.0994	20.4745	28.5993	22.0994	20.1495
1570	11.05	16.0333	20.7999	23.0744	16.2496	21.7745	20.1495	27.9493	21.7745	20.1495
1571	10.6166	16.2499	20.5833	23.3994	15.9246	22.0994	20.1495	27.9493	22.0994	20.1495
1572	11.4833	16.2499	20.7999	23.3994	15.5996	22.4244	20.1495	27.9493	22.4244	20.1495
1573	10.8333	16.2499	21.0166	23.0744	15.9246	22.0994	21.1245	28.2743	22.0994	20.1495
1574	11.2666	16.0333	20.7999	23.0744	15.9246	22.0994	20.4745	28.5993	22.0994	20.1495
1575	11.05	16.2499	20.7999	23.0744	15.9246	22.0994	20.1495	28.2743	22.0994	19.8245
1576	11.05	16.2499	20.7999	23.0744	15.9246	21.7745	20.1495	27.6243	21.7745	20.1495
1577	11.2666	16.2499	20.5833	23.0744	15.5996	21.7745	19.8245	28.2743	22.0994	20.1495
1578	11.05	16.2499	21.0166	23.3994	15.9246	22.0994	20.1495	27.9493	22.4244	20.1495
1579	10.8333	16.0333	20.7999	23.0744	15.9246	22.0994	20.1495	28.2743	22.0994	20.4745
1580	11.4833	16.2499	21.0166	23.3994	15.5996	21.7745	20.4745	27.9493	22.4244	20.1495
1581	11.4833	16.2499	21.0166	23.3994	15.9246	22.0994	20.1495	28.5993	21.7745	20.1495
1582	11.05	16.2499	20.5833	23.3994	16.2496	22.0994	19.4995	28.5993	21.7745	19.8245
1583	11.05	16.0333	20.7999	23.3994	15.9246	22.0994	20.7995	28.5993	22.0994	20.1495
1584	10.6166	16.4666	20.7999	23.3994	15.9246	21.7745	20.4745	28.2743	22.0994	20.1495
1585	11.05	16.0333	21.0166	23.0744	16.2496	22.0994	20.1495	27.9493	22.0994	20.1495
1586	10.6166	16.2499	21.2333	23.3994	15.2746	22.0994	20.4745	27.9493	22.0994	19.8245
1587	11.05	16.2499	21.0166	23.3994	15.9246	21.7745	20.1495	28.2743	22.0994	20.1495
1588	11.05	16.2499	21.0166	23.0744	15.5996	21.7745	20.4745	28.2743	22.0994	20.1495
1589	10.8333	16.0333	21.0166	23.0744	16.2496	21.7745	20.1495	28.5993	22.0994	20.7995
1590	11.2666	16.2499	21.2333	23.0744	16.2496	22.0994	20.4745	27.9493	21.7745	20.1495
1591	11.2666	16.2499	21.2333	23.3994	15.9246	22.0994	20.4745	28.2743	22.4244	20.1495
1592	11.05	16.2499	21.2333	23.0744	15.9246	22.4244	20.1495	28.2743	22.0994	20.1495
1593	11.05	16.0333	21.2333	23.0744	15.5996	22.4244	20.4745	28.2743	22.0994	20.1495
1594	10.6166	16.2499	21.0166	23.0744	16.2496	22.4244	20.1495	28.2743	22.0994	20.7995
1595	11.4833	16.0333	21.2333	23.0744	16.2496	22.4244	20.1495	28.5993	21.7745	20.4745
1596	11.2666	16.4666	20.7999	23.0744	16.5746	21.7745	20.7995	28.2743	22.0994	20.1495
1597	11.2666	16.2499	20.7999	23.3994	16.2496	22.0994	20.1495	28.2743	21.7745	19.8245
1598	11.2666	16.4666	21.0166	23.0744	16.2496	22.0994	20.1495	27.9493	22.4244	20.1495
1599	10.8333	16.2499	21.0166	23.0744	16.5746	21.7745	20.4745	28.5993	22.0994	20.1495
1600	10.8333	16.4666	20.7999	23.0744	16.2496	21.7745	21.1245	27.9493	22.0994	20.1495
1601	10.8333	16.4666	21.0166	23.0744	16.2496	22.0994	20.4745	28.2743	22.4244	20.1495
1602	10.8333	16.2499	21.0166	23.0744	16.2496	22.4244	20.1495	28.5993	22.0994	20.1495
1603	10.8333	16.4666	21.0166	23.0744	16.8996	21.7745	20.1495	28.2743	22.4244	20.4745
1604	11.2666	16.4666	21.0166	23.0744	16.8996	21.7745	19.8245	27.9493	22.4244	20.1495
1605	11.2666	16.4666	21.2333	23.3994	16.2496	22.0994	20.4745	27.9493	22.4244	20.1495
1606	10.8333	16.4666	20.7999	23.3994	16.2496	21.1245	20.4745	28.2743	22.4244	20.1495
1607	10.4	16.4666	21.0166	23.0744	16.2496	21.4495	20.1495	27.9493	22.4244	20.4745
1608	10.6166	16.4666	21.2333	23.0744	15.9246	21.7745	20.1495	28.5993	22.4244	20.4745
1609	10.8333	16.4666	21.0166	23.3994	15.9246	21.4495	20.1495	27.6243	22.0994	20.4745
1610	11.05	16.4666	20.7999	23.3994	15.9246	22.0994	20.4745	27.9493	22.4244	20.1495
1611	11.05	16.2499	21.2333	23.0744	15.9246	22.4244	20.1495	28.2743	22.0994	20.4745
1612	11.05	16.4666	21.0166	23.0744	16.5746	22.0994	20.7995	27.9493	22.0994	20.7995
1613	11.4833	16.6833	21.0166	23.0744	16.2496	22.0994	20.4745	27.9493	22.4244	20.4745
1614	11.4833	16.4666	21.0166	23.3994	16.2496	22.4244	20.4745	28.5993	22.0994	20.1495
1615	10.8333	16.4666	21.0166	23.0744	15.9246	21.7745	20.4745	28.2743	22.4244	20.7995
1616	10.6166	16.4666	21.0166	23.0744	16.2496	22.0994	20.1495	28.2743	22.4244	20.7995
1617	10.8333	16.4666	21.0166	23.0744	15.9246	22.0994	20.1495	28.2743	22.4244	20.7995
1618	11.2666	16.6833	20.7999	23.0744	16.2496	22.0994	20.1495	27.9493	22.4244	20.1495
1619	10.8333	16.6833	20.7999	23.0744	16.2496	22.4244	20.7995	28.5993	22.4244	20.4745
1620	10.6166	16.4666	21.0166	23.0744	15.5996	22.4244	20.4745	28.2743	22.4244	20.4745
1621	10.4	16.2499	21.0166	23.3994	16.2496	22.0994	19.8245	28.2743	22.4244	21.1245
1622	11.05	16.2499	21.0166	23.3994	15.9246	22.0994	20.4745	28.2743	22.4244	20.7995
1623	10.8333	16.2499	21.0166	23.0744	15.9246	22.4244	20.4745	28.2743	22.0994	20.4745
1624	10.8333	16.2499	21.0166	23.0744	15.9246	22.0994	20.4745	28.2743	21.7745	20.1495
1625	11.05	16.4666	20.7999	23.0744	15.9246	22.4244	20.4745	28.5993	22.0994	20.4745
1626	11.05	16.4666	21.0166	23.0744	15.9246	22.0994	20.1495	27.9493	22.0994	20.7995
1627	11.05	16.4666	20.7999	23.0744	16.2496	22.4244	20.1495	27.6243	22.0994	20.4745
1628	10.8333	16.2499	21.0166	23.3994	16.2496	22.4244	20.1495	28.2743	22.4244	20.4745
1629	10.8333	16.4666	21.0166	23.0744	16.5746	22.7494	20.4745	28.2743	22.0994	20.4745
1630	11.2666	16.4666	21.0166	23.3994	16.2496	22.7494	19.8245	27.9493	21.7745	20.4745
1631	11.05	16.2499	20.7999	23.3994	16.2496	22.4244	20.4745	27.9493	21.7745	20.1495
1632	11.2666	16.0333	21.2333	23.0744	15.9246	22.7494	20.7995	28.2743	21.7745	20.4745
1633	10.6166	16.2499	21.0166	23.0744	15.9246	22.4244	20.1495	28.5993	22.0994	20.4745
1634	11.4833	16.2499	21.0166	23.0744	16.2496	22.4244	20.4745	28.2743	21.7745	20.1495
1635	10.4	16.2499	21.0166	23.0744	16.2496	22.7494	20.1495	27.9493	22.0994	20.4745
1636	10.8333	16.4666	21.0166	23.3994	15.9246	22.4244	21.1245	27.9493	21.7745	20.4745
1637	10.8333	16.2499	20.7999	23.0744	16.2496	22.0994	20.7995	27.9493	22.0994	20.7995
1638	11.2666	16.4666	21.0166	23.0744	16.5746	22.4244	20.1495	27.6243	21.7745	20.4745
1639	10.8333	16.2499	20.7999	23.0744	16.2496	22.0994	20.4745	28.2743	21.7745	20.7995
1640	11.05	16.4666	21.0166	23.0744	16.2496	22.0994	20.7995	28.5993	22.0994	20.1495
1641	10.6166	16.2499	21.0166	23.0744	15.9246	21.7745	20.1495	27.9493	21.7745	20.1495
1642	10.6166	16.4666	21.2333	23.0744	16.2496	22.4244	20.4745	28.2743	22.0994	20.4745
1643	10.8333	16.2499	21.0166	23.0744	16.2496	22.0994	21.1245	28.2743	21.7745	20.1495
1644	11.05	16.2499	21.0166	23.0744	16.2496	22.0994	20.4745	28.2743	21.7745	20.4745
1645	11.2666	16.2499	20.7999	23.0744	16.5746	22.4244	20.1495	28.2743	21.7745	19.4995
1646	10.8333	16.2499	21.0166	23.0744	16.2496	22.4244	19.8245	27.9493	21.7745	20.1495
1647	10.8333	16.0333	21.0166	23.0744	16.2496	22.0994	20.1495	28.2743	21.7745	20.4745
1648	10.6166	16.2499	21.0166	23.3994	16.5746	21.7745	20.1495	27.6243	22.0994	20.4745
1649	11.05	16.2499	21.2333	23.0744	16.2496	22.4244	20.4745	28.2743	21.7745	19.8245
1650	10.4	16.2499	20.7999	23.3994	16.5746	21.7745	20.1495	27.9493	22.0994	19.8245
1651	11.05	16.2499	21.2333	23.3994	16.2496	22.0994	20.4745	28.2743	22.0994	20.1495
1652	10.6166	16.0333	21.0166	23.3994	16.5746	22.4244	19.8245	27.9493	21.7745	20.1495
1653	11.05	16.2499	20.7999	23.0744	16.5746	22.0994	20.7995	27.9493	22.0994	20.1495
1654	10.8333	16.2499	21.2333	23.0744	16.5746	22.4244	20.7995	28.2743	21.7745	20.1495
1655	10.1833	16.2499	20.7999	23.0744	16.2496	22.0994	20.7995	28.2743	21.7745	20.1495
1656	10.8333	16.2499	21.0166	23.0744	16.2496	22.0994	20.1495	27.9493	21.7745	20.1495
1657	11.05	16.4666	21.0166	23.0744	16.2496	22.0994	20.4745	28.2743	21.7745	20.4745
1658	11.05	16.2499	21.0166	23.3994	16.5746	22.4244	20.4745	28.2743	21.7745	20.1495
1659	11.05	16.2499	21.0166	23.0744	16.2496	22.0994	20.4745	28.2743	21.7745	20.1495
1660	11.05	16.0333	21.0166	23.0744	16.2496	22.4244	20.1495	28.2743	22.0994	20.1495
1661	10.8333	16.2499	20.7999	23.0744	16.5746	21.7745	20.4745	28.2743	22.0994	20.1495
1662	11.2666	16.2499	21.0166	23.0744	16.5746	22.0994	20.4745	28.2743	21.7745	20.1495
1663	11.2666	16.4666	21.2333	23.3994	16.2496	22.4244	20.4745	27.9493	21.7745	20.1495
1664	10.6166	16.0333	20.7999	23.0744	16.2496	22.4244	20.4745	28.5993	21.7745	20.4745
1665	10.8333	16.0333	20.7999	23.0744	16.5746	22.0994	20.4745	27.6243	22.0994	20.1495
1666	11.05	16.2499	21.0166	23.0744	16.5746	22.4244	20.7995	27.9493	22.0994	20.1495
1667	11.2666	16.4666	21.0166	23.0744	16.5746	22.4244	20.1495	27.9493	22.0994	20.4745
1668	11.05	16.4666	21.0166	23.0744	16.5746	22.0994	20.4745	27.9493	21.7745	20.1495
1669	11.05	16.2499	21.0166	23.0744	16.5746	22.4244	20.4745	28.2743	22.0994	20.4745
1670	11.05	16.4666	21.0166	23.3994	16.2496	22.7494	20.4745	28.2743	22.0994	20.1495
1671	11.05	16.2499	20.7999	23.0744	16.2496	22.4244	20.4745	28.2743	21.7745	20.4745
1672	10.6166	16.0333	20.7999	23.0744	16.2496	22.4244	20.1495	27.9493	21.7745	20.1495
1673	10.8333	16.2499	20.7999	23.0744	16.2496	22.4244	20.7995	27.9493	22.4244	20.1495
1674	11.05	16.2499	21.0166	23.0744	16.2496	22.4244	20.4745	28.2743	22.0994	19.8245
1675	11.2666	16.2499	21.0166	23.0744	16.2496	22.4244	20.7995	28.2743	22.0994	20.1495
1676	11.05	16.4666	21.2333	23.0744	16.2496	22.4244	20.7995	27.9493	21.7745	19.8245
1677	11.05	16.4666	21.0166	23.0744	16.2496	22.4244	20.1495	28.2743	22.0994	20.4745
1678	11.05	16.2499	21.0166	23.0744	16.2496	22.0994	20.7995	27.6243	22.4244	20.1495
1679	11.2666	16.4666	21.0166	23.3994	16.2496	22.0994	20.4745	27.9493	22.0994	19.8245
1680	11.2666	16.2499	20.7999	23.0744	16.2496	22.4244	20.7995	28.2743	22.0994	19.8245
1681	10.4	16.4666	21.0166	23.0744	16.2496	22.0994	20.1495	27.9493	22.0994	19.8245
1682	10.8333	16.2499	21.0166	23.3994	16.5746	22.0994	20.1495	27.9493	22.0994	20.1495
1683	11.05	16.2499	21.0166	23.3994	16.5746	23.0744	20.4745	27.9493	21.7745	20.1495
1684	10.6166	16.2499	20.7999	23.0744	15.9246	22.4244	20.1495	27.9493	22.0994	20.1495
1685	11.05	16.4666	21.0166	23.0744	16.2496	23.0744	20.1495	27.9493	22.0994	20.4745
1686	10.6166	16.4666	21.0166	23.0744	16.5746	22.7494	20.4745	27.6243	22.7494	20.4745
1687	11.05	16.2499	21.0166	23.3994	16.2496	22.4244	20.7995	28.5993	22.0994	20.1495
1688	10.4	16.0333	21.0166	23.0744	16.2496	22.4244	20.7995	27.6243	22.4244	20.4745
1689	10.6166	16.2499	20.7999	23.0744	16.2496	22.7494	20.7995	27.9493	21.7745	20.4745
1690	10.8333	16.2499	20.7999	23.0744	16.2496	22.0994	20.4745	28.2743	21.7745	20.4745
1691	10.8333	16.2499	21.0166	23.0744	16.2496	22.4244	20.7995	27.6243	21.7745	20.4745
1692	11.7	16.2499	20.7999	23.0744	16.2496	22.4244	20.7995	28.2743	21.7745	20.1495
1693	10.4	16.4666	21.2333	23.3994	16.2496	22.0994	20.7995	27.6243	22.0994	20.4745
1694	10.8333	16.2499	20.7999	23.0744	16.5746	22.4244	20.7995	27.9493	22.0994	20.4745
1695	10.4	16.2499	21.0166	23.0744	16.2496	22.4244	20.7995	28.2743	22.0994	20.4745
1696	10.8333	16.4666	20.7999	23.0744	16.2496	22.4244	20.7995	28.2743	22.0994	20.1495
1697	11.2666	16.2499	20.7999	23.0744	16.5746	22.4244	20.7995	28.2743	22.0994	19.8245
1698	10.8333	16.2499	20.7999	23.3994	16.5746	22.0994	20.7995	27.9493	22.0994	20.1495
1699	11.05	16.2499	20.7999	23.3994	16.2496	22.0994	20.7995	28.5993	22.4244	20.1495
1700	10.4	16.2499	21.0166	23.0744	16.5746	22.7494	21.1245	27.6243	22.0994	20.1495
1701	11.2666	16.2499	20.7999	23.0744	16.5746	22.0994	20.4745	27.6243	22.0994	20.1495
1702	11.4833	16.2499	20.7999	23.0744	16.2496	22.0994	20.7995	27.9493	22.4244	20.1495
1703	10.8333	16.2499	20.7999	23.0744	15.9246	22.4244	20.4745	28.2743	22.0994	19.8245
1704	11.05	16.2499	20.7999	23.0744	16.5746	21.7745	19.8245	28.5993	22.0994	20.1495
1705	10.8333	16.2499	20.7999	23.0744	16.5746	21.7745	20.7995	28.2743	22.0994	20.4745
1706	11.05	16.4666	20.7999	23.0744	16.5746	22.0994	20.4745	27.9493	22.4244	19.8245
1707	11.05	16.2499	20.7999	23.0744	16.2496	22.0994	20.1495	28.2743	21.7745	19.8245
1708	10.6166	16.2499	20.7999	23.0744	16.5746	22.0994	21.1245	27.6243	22.4244	20.1495
1709	11.2666	16.2499	20.7999	23.0744	16.5746	22.0994	20.1495	28.2743	22.4244	20.1495
1710	10.8333	16.4666	21.0166	23.0744	16.2496	21.7745	20.4745	28.5993	22.4244	20.1495
1711	10.6166	16.4666	20.7999	23.0744	16.2496	22.0994	21.1245	28.5993	22.0994	20.1495
1712	10.6166	16.4666	20.7999	23.0744	16.5746	22.0994	19.8245	28.5993	22.0994	19.8245
1713	10.8333	16.2499	20.7999	23.0744	16.5746	21.7745	20.7995	28.5993	22.0994	20.1495
1714	11.4833	16.2499	20.7999	23.0744	16.2496	22.0994	20.7995	27.9493	22.0994	20.1495
1715	11.4833	16.2499	20.7999	23.0744	16.5746	22.0994	21.4495	27.9493	22.4244	20.1495
1716	11.2666	16.2499	20.7999	23.0744	16.5746	22.0994	20.7995	27.9493	22.4244	20.7995
1717	11.2666	16.2499	20.7999	23.0744	16.2496	21.7745	20.7995	28.9243	21.7745	20.4745
1718	10.8333	16.2499	20.7999	23.0744	16.2496	21.7745	20.4745	28.2743	22.0994	20.4745
1719	10.6166	16.0333	21.0166	23.0744	16.5746	21.4495	20.7995	27.2993	22.4244	20.1495
1720	11.05	16.2499	21.0166	23.0744	16.2496	21.7745	20.7995	28.2743	22.7494	20.4745
1721	11.2666	16.2499	21.0166	23.0744	16.2496	22.0994	20.4745	28.2743	21.7745	20.1495
1722	11.4833	16.2499	21.0166	23.0744	16.2496	22.0994	20.4745	28.2743	22.4244	20.1495
1723	10.8333	16.4666	20.7999	23.0744	16.2496	21.7745	20.1495	28.2743	22.0994	20.1495
1724	11.05	16.4666	20.7999	23.0744	16.2496	21.7745	20.4745	27.9493	22.4244	20.1495
1725	11.05	16.0333	20.7999	23.0744	16.2496	21.7745	20.4745	27.6243	22.0994	20.1495
1726	10.8333	16.2499	20.7999	23.0744	16.5746	21.7745	20.7995	28.2743	22.0994	20.1495
1727	11.4833	16.2499	21.2333	23.0744	16.5746	22.0994	20.1495	27.6243	22.7494	20.1495
1728	10.8333	16.2499	21.0166	23.0744	16.2496	22.0994	20.7995	28.2743	22.7494	20.1495
1729	10.8333	16.0333	21.0166	23.0744	16.5746	21.7745	20.4745	27.9493	22.7494	19.8245
1730	10.8333	16.2499	20.7999	23.0744	16.5746	21.7745	20.4745	27.9493	22.7494	19.8245
1731	10.6166	16.2499	21.0166	23.0744	16.8996	22.0994	20.4745	28.2743	22.7494	19.8245
1732	11.05	16.0333	20.7999	23.0744	16.5746	22.0994	20.1495	28.2743	22.4244	19.8245
1733	10.6166	16.4666	21.0166	23.3994	16.2496	21.7745	20.7995	28.9243	22.7494	19.8245
1734	11.05	16.2499	20.7999	23.0744	16.5746	22.0994	20.1495	27.9493	22.0994	19.8245
1735	11.05	16.4666	20.7999	23.0744	16.2496	22.0994	20.1495	28.5993	22.0994	20.1495
1736	11.05	16.0333	20.7999	23.0744	16.8996	22.0994	20.4745	28.2743	22.0994	19.8245
1737	11.4833	16.2499	21.0166	23.0744	16.2496	22.4244	20.4745	28.5993	22.4244	19.8245
1738	10.6166	16.2499	20.7999	23.0744	16.5746	22.4244	20.4745	28.2743	23.0744	19.8245
1739	11.05	16.4666	20.7999	23.0744	16.2496	22.0994	20.4745	28.5993	22.7494	20.1495
1740	10.4	16.0333	20.7999	23.0744	16.2496	22.0994	20.4745	28.5993	22.4244	19.8245
1741	11.05	16.4666	21.0166	23.0744	16.8996	21.4495	20.4745	28.5993	22.0994	19.8245
1742	11.05	16.4666	20.7999	23.0744	16.5746	22.0994	20.7995	28.2743	22.7494	20.1495
1743	11.2666	16.4666	21.0166	23.0744	16.8996	21.7745	20.7995	28.5993	22.7494	20.1495
1744	11.2666	16.4666	20.7999	23.0744	16.5746	21.7745	20.4745	28.2743	22.7494	20.1495
1745	11.05	16.2499	20.7999	23.0744	16.2496	22.0994	20.1495	28.5993	23.0744	20.1495
1746	11.2666	16.2499	20.7999	23.0744	16.5746	21.7745	20.4745	28.5993	23.0744	19.8245
1747	11.05	16.2499	20.7999	23.0744	16.2496	22.0994	20.7995	28.2743	22.7494	20.1495
1748	11.2666	16.2499	20.7999	23.0744	16.2496	22.0994	20.4745	28.2743	22.7494	20.1495
1749	10.8333	16.2499	20.7999	23.0744	16.5746	22.7494	20.4745	28.5993	23.0744	20.1495
1750	10.6166	16.4666	20.7999	23.0744	16.2496	22.0994	20.4745	28.2743	22.4244	20.1495
1751	11.05	16.2499	20.7999	23.3994	16.5746	22.0994	20.7995	27.9493	22.0994	19.8245
1752	11.2666	16.2499	20.7999	23.3994	16.2496	22.7494	19.8245	27.9493	22.4244	20.1495
1753	10.8333	16.2499	20.7999	23.3994	16.2496	22.0994	20.1495	28.2743	22.7494	20.1495
1754	11.05	16.2499	20.7999	23.3994	16.8996	22.0994	19.8245	28.5993	22.4244	20.1495
1755	10.8333	16.4666	20.7999	23.3994	16.5746	21.7745	20.7995	28.5993	22.7494	20.4745
1756	10.8333	16.0333	20.7999	23.3994	16.5746	22.0994	20.4745	27.9493	22.7494	19.8245
1757	11.05	16.2499	20.7999	23.3994	16.2496	22.0994	20.7995	28.2743	22.7494	20.1495
1758	11.05	16.2499	20.7999	23.3994	16.2496	22.0994	20.4745	28.2743	22.4244	20.1495
1759	11.2666	16.2499	20.7999	23.3994	16.2496	22.4244	20.4745	28.2743	22.7494	19.8245
1760	11.2666	16.2499	20.7999	23.3994	16.5746	22.4244	20.7995	28.5993	23.0744	19.8245
1761	10.8333	16.2499	20.7999	23.3994	16.5746	22.4244	20.4745	28.5993	22.4244	19.8245
1762	10.4	16.2499	20.7999	23.3994	16.2496	22.4244	20.7995	28.2743	22.0994	19.4995
1763	10.8333	16.2499	21.0166	23.3994	16.2496	22.4244	20.4745	28.2743	22.7494	19.4995
1764	10.1833	16.2499	20.7999	23.3994	16.2496	22.4244	20.4745	28.5993	23.0744	20.1495
1765	11.2666	16.2499	20.7999	23.3994	16.2496	22.0994	20.4745	28.2743	22.0994	20.1495
1766	10.6166	16.2499	20.7999	23.3994	16.2496	22.4244	20.4745	28.2743	22.7494	20.1495
1767	10.4	16.2499	20.7999	23.3994	16.5746	22.7494	20.4745	27.9493	22.4244	19.8245
1768	10.6166	16.4666	20.7999	23.3994	16.2496	22.4244	20.4745	28.2743	22.7494	19.8245
1769	11.2666	16.2499	20.7999	23.3994	16.2496	22.7494	20.1495	28.2743	22.4244	20.1495
1770	10.8333	16.4666	20.7999	23.3994	16.2496	22.4244	20.4745	28.2743	22.4244	20.1495
1771	11.2666	16.2499	20.7999	23.3994	16.2496	22.4244	20.4745	28.2743	23.0744	20.1495
1772	11.05	16.2499	20.7999	23.3994	16.2496	22.0994	20.7995	28.2743	22.4244	20.1495
1773	11.05	16.0333	20.7999	23.3994	16.2496	22.0994	20.7995	28.2743	23.0744	20.1495
1774	11.4833	16.2499	20.7999	23.3994	16.5746	22.0994	20.4745	28.5993	22.4244	19.8245
1775	11.05	16.2499	20.7999	23.3994	16.2496	22.0994	20.1495	28.9243	23.0744	19.4995
1776	10.8333	16.2499	20.7999	23.3994	16.2496	22.0994	20.1495	28.2743	22.7494	19.8245
1777	10.8333	16.4666	20.5833	23.3994	16.5746	21.7745	20.4745	28.5993	22.7494	19.8245
1778	10.6166	16.2499	20.7999	23.3994	16.5746	22.0994	20.7995	28.2743	22.7494	19.8245
1779	10.8333	16.2499	20.7999	23.3994	16.2496	22.4244	21.1245	28.5993	22.7494	19.8245
1780	10.6166	16.2499	20.7999	23.3994	16.5746	22.0994	20.4745	28.2743	23.3994	19.8245
1781	11.2666	16.2499	20.7999	23.3994	16.5746	21.7745	20.4745	27.9493	23.0744	20.1495
1782	11.05	16.0333	20.7999	23.3994	16.5746	22.0994	20.4745	28.2743	22.7494	19.8245
1783	10.6166	16.4666	21.0166	23.3994	16.8996	21.7745	20.1495	28.2743	22.7494	19.4995
1784	10.6166	16.2499	20.7999	23.3994	16.5746	22.4244	20.1495	28.5993	22.4244	20.1495
1785	10.8333	16.2499	20.7999	23.3994	16.5746	22.0994	20.7995	28.5993	23.3994	20.1495
1786	11.05	16.2499	20.7999	23.3994	16.5746	22.4244	20.1495	27.9493	22.7494	20.1495
1787	11.05	16.2499	20.7999	23.3994	16.2496	22.0994	20.7995	28.5993	23.0744	20.1495
1788	11.05	16.2499	21.0166	23.3994	16.5746	22.0994	20.4745	28.2743	22.4244	19.8245
1789	11.2666	16.2499	21.0166	23.3994	16.5746	21.7745	20.7995	28.2743	22.0994	20.1495
1790	11.05	16.2499	20.7999	23.3994	16.5746	22.0994	20.1495	28.5993	22.4244	20.4745
1791	10.4	16.2499	21.0166	23.3994	16.2496	22.0994	20.7995	28.2743	22.7494	20.1495
1792	10.6166	16.2499	20.7999	23.3994	16.2496	22.0994	21.1245	28.5993	23.0744	20.1495
1793					16.5746	22.4244	20.4745	28.2743	23.0744	20.1495
1794					16.2496	22.4244	20.1495	28.2743	23.3994	20.1495
1795					16.5746	22.4244	20.7995	28.2743	23.0744	20.1495
1796					16.2496	22.7494	21.1245	27.9493	22.7494	19.4995
1797					16.2496	22.4244	21.4495	27.6243	23.3994	19.4995
1798					16.2496	22.7494	20.1495	28.5993	22.7494	19.8245
1799					16.2496	22.7494	20.4745	28.2743	23.0744	20.1495
	BGBV-075_0000	BGBV-106_0000	BGBV-117_0000	BGBV-134_0000	BGBV-253_0000	BGBV-333_0000	BGBV-334_0000	BGBV-355_0000	BGBV-407_0000	BGBV-417_0000
Pulse	10s;20hz;5ms	10s;20hz;5ms	10s;20hz;5ms	10s;20hz;5ms	10s;20hz;5ms	10s;20hz;5ms	10s;20hz;5ms	10s;20hz;5ms	10s;20hz;5ms	10s;20hz;5ms
LED	0.2	0.2	0.2	0.1	0.1	0.1	0.1	0.1	0.1	0.1
Layer	I	I	I	I	I	I	I	I	I	I
Min (ctrl)	12.35	18.6333	21.0166	23.7244	15.9246	22.7494	20.7995	26.3243	23.3994	19.1745
Max (ctrl)	12.7833	19.0666	21.4499	24.3744	16.5746	24.0494	22.0994	27.2993	24.3744	19.8245
Mean (ctrl)	12.5946	18.808	21.2892	24.0599	16.3125	23.0744	21.3736	26.88	24.0704	19.4471
sd (ctrl)	0.165405	0.15238	0.111434	0.102217	0.212605	0.283064	0.27896	0.280744	0.250834	0.147666
1.960*sd	0.324194	0.298665	0.21841	0.200346	0.416705	0.554806	0.546762	0.550259	0.491634	0.289426
2.576*sd	0.426083	0.392531	0.287053	0.263312	0.547669	0.729173	0.718601	0.723197	0.646148	0.380389
t0 (Opto) (sec.)	31	31	31	31	32	33	33	31	32	33
CV	0.013133	0.00810187	0.00523429	0.00424846	0.0130332	0.0122674	0.0130516	0.0104444	0.0104209	0.00759324
Neurovascular response	Vc	Vc	Vc	Vc	Vc-Vd		Vc	Vc-Vd	Vc	Vc-Vd
Onset contraction (3 points) (sec.)
Max-contraction (3 points)
Magnitude contraction (3points)
duration contraction (3 points)
Onset dilation (3 points) (sec.)
Max-dilation (3 points)
Magnitude dilation (3points)
Max-dilatation
Max-contraction
t Max-contraction
DContraction
Contraction K+
Sexe
Age

## Sheet: Paxilline
Stimulation
Time	BGBV-195	BGBV-196	BGBV-197	BGBV-221	BGBV-222	BGBV-435	BGBV-443	BGBV-444	BGBV-445	BGBV-446
0	10.0747	20.1495	15.9246	12.3497	17.5496	19.8245	16.2496	14.2996	21.7745	19.1745
1	10.0747	20.1495	16.5746	12.3497	17.5496	20.1495	15.9246	14.6246	21.7745	19.1745
2	10.0747	20.1495	16.8996	12.3497	17.5496	20.1495	15.9246	14.6246	21.1245	18.5245
3	10.0747	20.1495	16.5746	12.0247	17.5496	19.8245	15.5996	14.2996	22.7494	18.5245
4	10.0747	20.1495	17.2246	12.6747	17.5496	20.4745	15.9246	14.9496	21.7745	18.5245
5	10.0747	20.1495	16.2496	12.3497	17.5496	19.8245	15.9246	14.9496	21.4495	18.5245
6	10.0747	20.1495	16.2496	12.0247	17.5496	19.8245	15.9246	14.6246	22.0994	18.8495
7	9.74976	20.1495	15.9246	11.6997	17.5496	20.4745	15.9246	14.9496	21.7745	18.5245
8	10.0747	20.1495	14.9496	12.0247	17.5496	20.1495	16.2496	14.9496	21.4495	19.1745
9	10.0747	20.1495	15.9246	12.3497	17.5496	19.8245	16.2496	14.9496	21.4495	17.8746
10	10.0747	20.1495	16.2496	12.3497	17.5496	19.8245	15.9246	14.6246	22.4244	18.8495
11	10.0747	20.4745	16.2496	11.6997	17.8746	20.1495	15.9246	14.9496	22.0994	18.1995
12	10.0747	20.1495	16.2496	12.0247	17.5496	20.1495	15.5996	14.6246	22.0994	18.5245
13	10.0747	20.1495	15.5996	12.0247	17.5496	19.8245	15.9246	14.9496	21.7745	18.5245
14	10.0747	20.1495	16.2496	12.3497	17.5496	20.1495	15.9246	14.9496	22.0994	18.5245
15	9.74976	20.1495	15.5996	12.3497	17.5496	20.4745	16.2496	14.9496	22.0994	18.8495
16	10.0747	20.1495	16.2496	12.0247	17.5496	19.8245	16.2496	14.9496	22.4244	18.8495
17	9.74976	20.1495	16.2496	12.3497	17.5496	19.8245	16.2496	14.9496	22.0994	18.8495
18	10.0747	20.1495	16.2496	12.3497	17.5496	20.4745	15.5996	14.9496	21.7745	18.5245
19	10.0747	20.1495	16.2496	12.0247	17.5496	20.1495	16.2496	14.9496	22.0994	18.8495
20	10.0747	20.1495	16.5746	12.0247	17.5496	20.4745	16.2496	14.9496	21.7745	18.8495
21	10.0747	20.1495	16.2496	12.0247	17.5496	20.1495	16.5746	14.9496	22.0994	18.1995
22	10.0747	20.1495	17.2246	12.6747	17.5496	20.4745	15.9246	15.2746	22.0994	19.1745
23	10.0747	20.1495	16.8996	12.3497	17.5496	20.4745	15.9246	14.9496	22.0994	18.5245
24	10.0747	20.1495	16.2496	12.3497	17.5496	20.1495	15.9246	14.9496	21.7745	18.1995
25	10.0747	20.1495	15.9246	12.6747	17.5496	20.1495	16.2496	14.9496	22.0994	18.8495
26	10.0747	20.1495	16.2496	12.6747	17.5496	20.1495	16.5746	15.2746	22.4244	19.1745
27	10.0747	20.1495	16.5746	12.6747	17.5496	20.4745	15.9246	15.2746	22.4244	18.5245
28	10.0747	20.1495	16.8996	12.6747	17.5496	20.4745	15.9246	15.2746	22.0994	18.8495
29	10.0747	19.8245	16.2496	12.6747	17.5496	20.1495	15.9246	15.2746	22.0994	18.8495
30	10.0747	20.1495	16.5746	12.6747	17.5496	20.1495	16.2496	14.9496	22.0994	18.8495
31	10.0747	20.1495	16.5746	12.6747	17.8746	20.4745	16.2496	14.9496	21.7745	18.8495
32	10.0747	20.1495	16.2496	12.6747	17.5496	20.1495	15.9246	15.2746	22.0994	18.5245
33	10.0747	20.1495	15.9246	12.6747	17.5496	20.4745	16.5746	15.2746	21.7745	18.8495
34	10.0747	20.1495	15.9246	12.3497	17.5496	20.1495	16.5746	14.9496	21.7745	18.8495
35	10.0747	20.1495	15.9246	12.6747	17.5496	20.1495	16.5746	14.9496	21.7745	18.8495
36	10.0747	20.1495	15.5996	12.0247	17.5496	20.1495	16.2496	14.9496	21.7745	18.8495
37	10.0747	20.1495	16.2496	12.6747	17.5496	20.1495	16.2496	14.2996	21.7745	19.1745
38	10.0747	20.1495	16.2496	12.6747	17.5496	20.1495	16.2496	14.9496	21.7745	19.1745
39	10.0747	20.1495	15.5996	12.0247	17.8746	20.1495	16.5746	14.6246	21.7745	18.5245
40	10.0747	20.4745	15.5996	12.0247	17.8746	20.1495	16.2496	14.9496	21.7745	18.5245
41	10.0747	20.4745	16.2496	12.3497	17.8746	20.4745	16.2496	14.2996	21.7745	19.1745
42	10.0747	20.1495	15.9246	12.6747	17.5496	20.1495	16.2496	14.9496	22.0994	18.5245
43	10.0747	20.4745	15.9246	12.0247	17.5496	20.1495	16.2496	14.9496	22.0994	18.8495
44	10.0747	20.1495	16.2496	12.3497	17.5496	20.1495	16.5746	14.6246	22.4244	18.1995
45	10.0747	20.1495	15.2746	12.0247	17.5496	19.8245	15.9246	15.2746	22.0994	19.1745
46	10.0747	20.4745	15.2746	12.3497	17.5496	20.1495	16.2496	14.6246	22.4244	18.8495
47	10.0747	20.4745	15.5996	12.9997	17.5496	20.1495	16.2496	14.9496	22.0994	18.8495
48	9.74976	20.1495	16.5746	12.3497	17.5496	19.8245	16.5746	14.9496	21.7745	18.8495
49	10.0747	19.8245	15.9246	12.6747	17.5496	20.1495	16.5746	14.9496	21.7745	18.5245
50	10.0747	20.4745	15.9246	12.3497	17.5496	20.1495	16.5746	14.9496	22.0994	18.8495
51	9.74976	20.4745	15.5996	12.3497	17.5496	20.1495	16.2496	14.9496	21.7745	18.1995
52	10.3997	20.4745	14.9496	12.0247	17.5496	19.8245	16.2496	14.6246	22.0994	18.8495
53	10.0747	20.4745	15.2746	12.0247	17.5496	19.8245	16.2496	14.9496	21.7745	18.8495
54	10.0747	20.4745	15.9246	12.3497	17.5496	19.8245	16.2496	14.9496	21.4495	18.8495
55	10.0747	20.1495	15.5996	11.6997	17.5496	20.1495	15.9246	15.2746	21.7745	18.8495
56	10.0747	20.4745	15.2746	12.9997	17.8746	20.4745	16.5746	15.2746	21.4495	18.8495
57	10.0747	20.1495	15.2746	12.0247	17.5496	20.4745	16.5746	14.9496	21.7745	18.8495
58	10.0747	20.1495	15.2746	12.3497	17.2246	20.4745	16.5746	14.9496	21.4495	18.5245
59	10.0747	19.8245	15.2746	12.0247	17.2246	20.1495	16.5746	15.2746	21.4495	18.5245
60	9.74976	19.8245	14.6246	12.3497	17.2246	20.1495	16.5746	15.2746	20.7995	18.1995
61	10.0747	19.8245	14.2996	12.0247	17.2246	20.1495	16.2496	14.9496	21.1245	18.8495
62	9.42476	19.4995	14.6246	12.3497	17.2246	20.4745	16.5746	14.9496	21.1245	18.8495
63	9.74976	19.1745	14.9496	11.6997	17.2246	20.1495	16.2496	14.6246	20.7995	18.8495
64	10.0747	19.8245	14.9496	12.0247	17.5496	19.8245	15.9246	15.2746	21.1245	18.8495
65	10.0747	19.4995	15.2746	12.3497	17.2246	19.4995	16.2496	14.2996	20.7995	18.5245
66	10.0747	19.1745	15.2746	12.3497	17.2246	19.4995	15.9246	14.6246	21.4495	18.1995
67	10.0747	19.1745	14.2996	11.6997	17.2246	19.8245	15.9246	14.9496	20.4745	18.1995
68	9.74976	19.1745	15.5996	12.0247	16.8996	20.1495	16.2496	15.2746	20.7995	18.5245
69	9.74976	19.1745	14.6246	12.6747	16.8996	19.8245	15.9246	14.6246	20.4745	18.5245
70	9.74976	19.1745	15.2746	12.0247	16.8996	20.4745	15.9246	14.9496	20.4745	18.1995
71	9.74976	19.1745	14.6246	12.6747	17.2246	19.8245	15.9246	15.2746	20.1495	18.1995
72	9.74976	18.5245	13.9747	11.6997	16.8996	20.1495	16.2496	14.6246	20.7995	17.8746
73	9.74976	18.8495	14.9496	12.0247	16.8996	19.8245	15.9246	13.9747	21.1245	18.1995
74	9.42476	18.5245	14.6246	12.0247	16.8996	19.4995	15.9246	13.9747	20.7995	18.5245
75	9.74976	18.5245	15.2746	11.6997	16.8996	19.4995	15.9246	15.2746	20.1495	17.8746
76	9.42476	18.8495	14.9496	12.0247	16.8996	19.1745	15.5996	14.6246	20.1495	18.1995
77	10.0747	18.5245	14.6246	12.0247	16.8996	19.1745	15.5996	14.9496	19.4995	17.5496
78	9.74976	18.5245	14.9496	12.0247	16.5746	19.4995	15.5996	14.6246	19.8245	17.8746
79	9.42476	18.1995	14.6246	12.3497	16.8996	19.4995	15.5996	13.9747	19.8245	18.1995
80	9.74976	18.1995	14.9496	11.6997	16.5746	19.8245	15.5996	13.9747	20.4745	17.5496
81	9.74976	17.8746	14.9496	12.0247	16.8996	19.8245	15.2746	13.6497	20.4745	17.5496
82	9.74976	17.8746	14.9496	11.3747	16.5746	19.8245	15.5996	13.6497	20.7995	18.5245
83	9.42476	17.5496	14.2996	12.0247	16.5746	19.8245	15.5996	13.6497	20.7995	18.1995
84	9.74976	17.5496	14.9496	11.6997	16.5746	18.8495	14.9496	13.3247	20.7995	17.2246
85	9.74976	17.8746	15.2746	11.6997	16.8996	18.8495	15.5996	14.2996	20.4745	18.1995
86	9.74976	17.8746	14.6246	11.6997	16.2496	19.1745	14.9496	14.2996	20.4745	17.8746
87	9.42476	17.5496	14.9496	11.3747	16.5746	19.1745	14.6246	13.9747	20.4745	17.5496
88	9.42476	17.8746	13.6497	11.6997	16.5746	19.4995	15.9246	13.9747	20.4745	17.5496
89	9.74976	17.5496	13.9747	11.6997	16.5746	19.1745	14.9496	14.2996	20.4745	17.5496
90	9.42476	17.8746	14.9496	11.6997	16.5746	19.1745	15.5996	13.9747	20.4745	17.8746
91	9.42476	16.8996	14.6246	12.0247	16.5746	19.1745	15.9246	13.3247	20.4745	18.1995
92	9.42476	17.5496	12.9997	11.6997	16.5746	18.5245	15.2746	13.3247	20.4745	17.8746
93	9.42476	17.8746	12.6747	11.6997	16.5746	18.1995	15.2746	13.6497	20.1495	17.8746
94	9.42476	17.8746	12.9997	11.0497	16.2496	18.5245	14.9496	13.6497	19.8245	17.2246
95	9.42476	17.5496	12.6747	12.0247	16.2496	18.8495	15.2746	13.3247	19.8245	16.8996
96	9.42476	17.5496	14.2996	12.0247	15.9246	18.8495	15.5996	13.3247	19.4995	17.8746
97	9.42476	17.2246	14.2996	12.0247	16.8996	18.8495	14.6246	13.6497	20.1495	17.8746
98	9.74976	17.2246	13.9747	11.6997	15.9246	18.8495	14.2996	12.9997	20.1495	17.5496
99	9.42476	17.2246	15.2746	11.6997	16.2496	19.1745	14.6246	12.9997	20.1495	17.8746
100	9.42476	17.2246	14.6246	11.3747	16.2496	19.1745	14.9496	12.9997	19.8245	17.2246
101	9.09977	17.2246	13.9747	11.6997	15.2746	19.1745	14.6246	12.6747	19.8245	17.2246
102	9.42476	16.8996	14.6246	11.0497	15.5996	19.4995	15.5996	12.9997	20.1495	17.5496
103	9.09977	17.5496	14.2996	11.0497	16.2496	18.5245	14.9496	13.3247	20.1495	16.8996
104	9.42476	17.5496	12.0247	11.0497	16.5746	18.8495	14.9496	13.9747	19.8245	17.2246
105	9.09977	17.2246	12.9997	11.3747	16.5746	18.5245	14.9496	13.6497	19.8245	17.2246
106	9.09977	17.5496	13.3247	11.3747	16.2496	19.1745	15.2746	13.6497	19.8245	17.2246
107	9.74976	17.8746	14.2996	12.0247	16.2496	19.1745	14.9496	13.6497	20.1495	17.2246
108	9.09977	17.8746	14.2996	11.3747	16.2496	18.5245	14.9496	13.9747	19.8245	16.5746
109	9.74976	17.8746	13.9747	11.6997	16.5746	18.5245	15.5996	13.9747	19.8245	16.8996
110	9.42476	17.5496	13.6497	11.3747	16.2496	18.5245	15.9246	13.9747	19.8245	17.2246
111	9.74976	17.5496	12.6747	11.6997	16.5746	18.5245	15.5996	13.6497	19.8245	16.8996
112	9.09977	17.5496	13.9747	11.3747	16.2496	18.1995	15.5996	13.6497	19.8245	16.8996
113	9.42476	17.8746	13.6497	11.0497	16.2496	18.5245	15.5996	13.6497	19.4995	16.8996
114	9.74976	17.5496	13.9747	11.0497	16.2496	18.8495	15.9246	14.2996	19.4995	16.8996
115	9.42476	17.5496	13.9747	10.7247	16.5746	18.5245	15.5996	13.9747	19.4995	16.8996
116	9.42476	17.8746	14.2996	11.3747	16.2496	18.5245	15.2746	13.6497	20.1495	17.2246
117	9.09977	17.5496	13.9747	11.6997	16.2496	18.5245	15.2746	13.9747	19.4995	16.2496
118	9.09977	17.8746	14.2996	11.0497	16.2496	18.5245	15.5996	13.9747	19.4995	16.5746
119	9.42476	17.5496	13.6497	11.6997	16.2496	18.8495	15.5996	14.2996	19.4995	17.2246
120	9.42476	17.5496	13.9747	11.0497	16.2496	18.1995	14.9496	13.6497	19.4995	16.8996
121	9.09977	17.8746	13.3247	11.3747	16.2496	18.5245	14.9496	13.6497	19.4995	16.5746
122	9.42476	17.5496	14.6246	11.3747	16.2496	18.1995	14.6246	13.6497	20.1495	16.5746
123	9.74976	17.8746	12.9997	11.0497	16.2496	18.8495	14.2996	13.3247	19.4995	16.5746
124	9.74976	17.8746	13.6497	11.3747	16.2496	18.8495	14.2996	13.3247	19.4995	16.5746
125	9.09977	17.8746	13.3247	11.0497	16.2496	18.5245	14.2996	13.6497	19.8245	16.2496
126	9.42476	17.5496	12.3497	11.0497	15.9246	18.5245	13.9747	13.3247	19.8245	16.5746
127	9.42476	17.8746	12.9997	11.6997	16.2496	18.1995	14.2996	13.6497	19.4995	16.8996
128	9.09977	17.8746	12.9997	10.3997	16.2496	18.5245	14.2996	13.3247	19.8245	16.5746
129	9.09977	17.8746	12.6747	11.6997	16.2496	18.1995	13.6497	13.6497	19.4995	16.2496
130	9.42476	18.1995	12.6747	11.3747	16.2496	18.5245	13.6497	13.3247	19.4995	16.2496
131	9.42476	17.8746	13.3247	11.0497	16.2496	18.5245	14.2996	13.3247	19.4995	17.2246
132	9.42476	17.8746	13.9747	11.3747	16.2496	18.1995	14.6246	14.2996	19.4995	16.2496
133	9.42476	17.8746	13.3247	11.3747	15.9246	18.5245	14.9496	13.3247	19.4995	16.2496
134	9.42476	17.8746	13.6497	10.7247	15.9246	18.5245	14.6246	13.3247	19.8245	16.8996
135	8.77478	17.5496	13.6497	11.0497	15.9246	18.5245	14.6246	13.3247	19.8245	16.2496
136	9.09977	17.5496	12.6747	10.7247	16.2496	18.5245	13.9747	13.6497	19.4995	16.5746
137	9.09977	17.8746	12.9997	11.3747	16.2496	18.1995	14.6246	13.6497	19.8245	15.9246
138	9.42476	18.1995	13.6497	11.0497	15.9246	18.1995	15.2746	13.6497	19.8245	16.8996
139	9.09977	17.8746	13.3247	11.3747	16.2496	18.1995	15.2746	13.6497	19.4995	16.8996
140	9.09977	18.1995	12.9997	11.3747	16.2496	18.1995	14.6246	13.3247	19.4995	16.5746
141	9.42476	18.5245	13.9747	11.0497	16.2496	18.5245	14.6246	13.3247	19.1745	16.8996
142	9.74976	17.8746	12.9997	11.0497	16.2496	18.5245	14.2996	12.6747	19.4995	16.2496
143	9.09977	17.5496	13.6497	11.0497	16.2496	18.1995	14.2996	13.6497	19.4995	16.5746
144	9.42476	17.8746	13.9747	11.3747	16.2496	18.5245	14.2996	13.6497	19.1745	16.8996
145	8.77478	17.8746	12.9997	10.7247	15.9246	18.1995	14.6246	13.3247	19.1745	16.2496
146	9.09977	17.8746	12.9997	11.0497	16.2496	18.5245	14.9496	13.6497	19.4995	16.5746
147	9.42476	18.5245	12.6747	10.7247	16.2496	18.1995	14.6246	13.3247	19.4995	16.5746
148	9.09977	18.1995	12.9997	10.7247	16.2496	18.1995	14.9496	13.3247	19.8245	16.8996
149	9.42476	18.5245	13.6497	11.0497	16.2496	18.5245	14.6246	13.6497	19.4995	17.2246
150	9.09977	18.1995	12.9997	10.7247	16.2496	18.1995	14.2996	13.9747	19.4995	16.8996
151	9.09977	18.1995	13.6497	10.7247	15.9246	18.5245	14.6246	13.3247	19.4995	15.9246
152	9.42476	18.1995	12.9997	10.0747	15.9246	18.1995	14.6246	13.9747	19.4995	16.2496
153	9.42476	18.1995	12.9997	10.7247	16.2496	18.1995	14.9496	12.9997	19.4995	16.2496
154	9.42476	18.1995	13.3247	10.7247	15.9246	18.5245	14.6246	13.6497	19.4995	16.2496
155	9.09977	17.8746	13.6497	10.7247	16.2496	18.5245	14.2996	13.6497	19.8245	15.5996
156	9.09977	18.1995	13.6497	10.7247	15.9246	18.5245	14.2996	13.9747	19.4995	16.2496
157	9.09977	17.8746	13.3247	10.3997	15.9246	18.5245	14.6246	13.3247	19.4995	16.2496
158	9.09977	17.8746	12.9997	10.7247	16.2496	18.5245	14.9496	13.3247	19.4995	16.2496
159	9.42476	18.5245	13.6497	10.7247	16.2496	18.5245	13.9747	12.9997	19.4995	16.5746
160	9.09977	18.1995	13.3247	10.3997	15.9246	18.5245	14.6246	13.6497	19.4995	16.5746
161	9.09977	18.5245	12.9997	10.3997	16.2496	18.5245	14.9496	13.6497	19.8245	16.2496
162	9.74976	18.5245	14.2996	10.3997	15.9246	18.5245	14.9496	12.9997	19.4995	16.5746
163	9.42476	18.1995	12.6747	10.3997	15.9246	18.5245	15.5996	13.6497	19.8245	16.2496
164	9.42476	17.8746	13.3247	10.3997	15.9246	18.5245	14.9496	13.9747	19.8245	16.5746
165	9.74976	18.1995	12.6747	10.7247	15.9246	18.5245	14.6246	13.3247	19.4995	16.2496
166	9.42476	18.8495	12.6747	10.0747	15.9246	18.5245	14.2996	14.2996	19.4995	16.8996
167	9.42476	18.1995	12.9997	10.7247	15.9246	18.5245	14.2996	13.9747	19.4995	16.5746
168	9.42476	18.1995	13.6497	10.7247	15.9246	18.5245	14.9496	13.6497	19.8245	16.8996
169	9.09977	18.5245	13.6497	10.7247	15.9246	18.5245	15.2746	13.6497	19.8245	16.5746
170	9.42476	18.5245	12.6747	10.3997	16.2496	18.8495	14.9496	13.6497	19.1745	17.5496
171	9.74976	17.8746	12.9997	10.7247	16.2496	18.8495	14.9496	13.3247	19.4995	16.5746
172	9.09977	18.5245	13.3247	10.3997	16.2496	18.8495	14.9496	13.3247	19.4995	16.8996
173	9.74976	18.1995	13.6497	10.7247	15.9246	18.5245	14.6246	13.3247	19.1745	16.8996
174	9.42476	18.1995	13.3247	10.7247	15.9246	18.8495	14.2996	13.6497	19.4995	16.8996
175	9.42476	18.5245	13.6497	10.3997	15.9246	18.5245	14.6246	12.9997	19.4995	16.2496
176	9.42476	18.5245	13.3247	10.3997	15.9246	18.5245	14.9496	12.9997	19.1745	15.9246
177	9.42476	18.5245	12.9997	10.3997	16.2496	18.5245	14.9496	12.9997	19.1745	16.5746
178	9.42476	18.8495	13.6497	10.7247	15.9246	18.5245	14.6246	12.6747	19.4995	16.2496
179	9.42476	19.1745	13.3247	10.0747	16.2496	18.5245	14.2996	12.6747	19.4995	15.9246
180	9.42476	18.8495	12.9997	10.0747	15.9246	18.8495	14.6246	12.9997	19.1745	16.2496
181	9.42476	18.5245	12.6747	10.0747	16.2496	19.1745	14.2996	13.3247	19.1745	15.9246
182	9.42476	18.1995	13.3247	10.0747	15.9246	18.8495	14.9496	13.3247	19.1745	15.9246
183	9.42476	17.8746	12.9997	10.7247	15.9246	18.5245	14.6246	12.9997	19.1745	17.2246
184	9.42476	17.8746	14.2996	10.0747	15.9246	18.5245	14.9496	12.3497	19.1745	15.9246
185	9.42476	18.5245	12.6747	10.7247	16.2496	18.8495	14.6246	12.6747	19.1745	16.8996
186	9.42476	18.1995	13.9747	10.7247	15.9246	19.1745	14.6246	13.3247	19.1745	17.2246
187	9.42476	18.5245	13.6497	10.3997	16.2496	18.5245	14.9496	13.3247	19.1745	16.2496
188	9.42476	18.5245	13.6497	11.3747	15.9246	18.5245	14.2996	13.6497	19.1745	16.8996
189	9.42476	18.5245	14.2996	11.0497	15.9246	18.5245	14.9496	13.3247	19.1745	17.8746
190	9.42476	19.1745	13.6497	11.3747	15.9246	18.8495	14.6246	12.9997	19.4995	16.2496
191	9.09977	18.8495	13.3247	11.0497	15.9246	18.5245	14.6246	13.6497	19.1745	16.8996
192	9.42476	18.5245	13.3247	11.3747	15.9246	18.5245	15.2746	12.6747	19.4995	16.5746
193	9.42476	18.5245	13.6497	11.3747	16.2496	18.8495	14.9496	13.3247	19.4995	16.8996
194	9.42476	18.1995	13.9747	11.0497	15.9246	18.5245	14.9496	12.9997	19.1745	16.5746
195	9.42476	18.5245	13.6497	11.3747	15.5996	18.5245	14.9496	12.9997	19.1745	17.5496
196	9.42476	17.2246	13.6497	11.3747	15.9246	18.5245	14.9496	13.3247	19.1745	17.2246
197	9.42476	18.5245	13.6497	11.6997	15.9246	18.5245	15.5996	12.6747	19.4995	17.5496
198	9.74976	18.8495	13.9747	11.3747	15.9246	18.5245	15.5996	12.3497	19.1745	16.8996
199	9.42476	18.5245	14.2996	11.6997	15.9246	18.5245	14.9496	12.6747	19.1745	17.2246
200	9.42476	18.5245	13.6497	11.6997	15.9246	18.5245	14.9496	13.3247	19.4995	17.2246
201	9.09977	18.5245	13.9747	11.6997	15.9246	18.5245	14.6246	12.0247	19.4995	16.8996
202	9.42476	18.5245	13.3247	11.3747	15.9246	18.5245	14.9496	12.6747	19.1745	17.2246
203	9.09977	18.1995	14.2996	11.3747	15.9246	18.8495	14.9496	12.9997	19.1745	18.1995
204	9.42476	17.5496	13.3247	11.6997	15.9246	18.8495	15.2746	13.3247	19.1745	16.8996
205	9.42476	18.5245	13.9747	11.3747	15.9246	18.8495	15.2746	12.9997	19.4995	17.2246
206	9.09977	18.1995	13.9747	11.6997	15.9246	18.8495	14.6246	13.3247	19.1745	16.5746
207	9.42476	17.8746	13.6497	11.6997	15.9246	18.8495	15.2746	12.9997	19.1745	17.2246
208	9.42476	17.8746	13.3247	12.0247	15.9246	18.8495	15.2746	13.3247	19.4995	16.2496
209	9.74976	18.5245	13.6497	11.6997	15.9246	19.1745	15.2746	12.9997	19.4995	16.2496
210	9.42476	18.5245	13.6497	11.6997	15.9246	18.8495	14.6246	12.6747	19.1745	17.2246
211	9.09977	18.5245	14.2996	11.6997	15.9246	18.8495	14.9496	13.3247	18.8495	15.9246
212	9.09977	18.5245	13.9747	11.3747	16.2496	18.8495	15.2746	12.9997	19.1745	16.5746
213	9.42476	17.8746	12.9997	11.0497	15.9246	19.1745	14.9496	13.3247	19.1745	16.5746
214	9.09977	17.8746	14.2996	11.0497	16.2496	18.8495	14.6246	12.9997	18.8495	17.5496
215	9.42476	18.1995	13.3247	11.0497	15.9246	18.8495	14.9496	13.3247	18.8495	16.5746
216	9.09977	17.5496	13.6497	10.7247	15.9246	18.8495	15.2746	13.6497	18.8495	16.8996
217	9.09977	17.8746	13.6497	11.3747	15.9246	18.8495	14.9496	13.6497	19.1745	17.5496
218	9.42476	17.2246	13.6497	11.3747	15.9246	18.8495	14.9496	13.3247	18.8495	16.5746
219	9.42476	17.8746	14.2996	11.0497	15.9246	18.8495	14.6246	13.3247	19.1745	17.5496
220	9.42476	18.1995	13.6497	10.7247	16.2496	18.8495	14.6246	13.3247	19.1745	16.5746
221	9.42476	17.8746	13.9747	11.0497	15.5996	18.8495	14.9496	13.3247	19.1745	16.8996
222	9.42476	17.8746	14.2996	11.3747	16.2496	18.8495	15.2746	13.6497	19.4995	17.2246
223	9.42476	17.5496	13.6497	12.0247	15.9246	18.5245	14.6246	13.3247	19.1745	16.5746
224	9.09977	17.8746	13.9747	11.6997	15.9246	18.8495	15.2746	13.9747	19.4995	16.8996
225	9.42476	17.5496	14.2996	11.6997	15.9246	18.8495	14.6246	13.9747	19.1745	16.8996
226	9.09977	18.1995	13.9747	11.3747	16.2496	18.8495	14.6246	14.2996	19.4995	16.8996
227	9.09977	17.2246	13.3247	11.3747	16.2496	18.8495	14.9496	14.2996	19.4995	16.5746
228	9.42476	17.5496	14.2996	11.6997	16.2496	19.1745	15.2746	14.2996	19.8245	17.2246
229	9.09977	17.2246	13.6497	11.3747	16.5746	18.8495	15.2746	14.2996	19.1745	16.8996
230	9.42476	17.8746	13.9747	11.3747	16.2496	18.5245	15.2746	13.6497	19.4995	16.8996
231	9.42476	17.2246	14.2996	11.3747	16.2496	18.8495	15.2746	14.2996	19.4995	16.8996
232	9.42476	18.1995	13.9747	11.6997	16.2496	19.1745	15.2746	14.2996	19.8245	17.5496
233	9.42476	17.5496	13.3247	11.6997	15.9246	18.8495	15.2746	13.9747	19.4995	16.8996
234	9.09977	17.8746	13.9747	11.6997	16.2496	18.8495	14.9496	13.3247	19.4995	17.8746
235	9.09977	17.8746	13.6497	11.6997	16.5746	18.5245	14.9496	13.9747	19.4995	16.5746
236	9.42476	18.1995	13.9747	11.6997	15.9246	18.5245	14.9496	13.6497	19.8245	17.2246
237	9.42476	18.1995	13.9747	11.3747	16.2496	18.5245	15.2746	13.3247	19.4995	16.8996
238	9.42476	17.8746	13.6497	11.0497	16.2496	18.5245	15.2746	13.6497	19.4995	16.5746
239	9.09977	17.8746	13.6497	11.0497	16.5746	18.5245	15.2746	13.6497	19.4995	17.2246
240	9.42476	17.8746	13.6497	11.3747	16.2496	18.5245	15.2746	13.3247	19.4995	17.2246
241	9.74976	17.8746	13.6497	11.3747	15.9246	18.5245	15.2746	13.3247	19.8245	17.2246
242	9.42476	17.5496	13.9747	11.3747	16.2496	18.5245	14.6246	13.3247	19.8245	16.8996
243	9.74976	17.8746	13.3247	11.0497	15.2746	18.5245	14.9496	12.9997	19.4995	16.5746
244	9.42476	17.2246	13.9747	11.0497	14.2996	18.5245	15.5996	13.6497	20.1495	16.5746
245	9.09977	17.8746	14.2996	10.3997	14.6246	18.5245	15.5996	13.6497	19.4995	16.5746
246	9.74976	17.8746	14.2996	10.7247	15.5996	18.5245	15.2746	13.3247	19.4995	16.8996
247	9.42476	17.8746	14.6246	10.3997	15.2746	18.5245	14.6246	12.9997	20.1495	16.8996
248	9.74976	17.8746	13.6497	10.7247	15.5996	18.5245	14.9496	13.3247	19.4995	17.2246
249	9.74976	17.5496	13.9747	10.7247	14.9496	18.5245	14.9496	13.3247	19.4995	16.8996
250	9.74976	17.8746	13.9747	10.7247	14.6246	18.5245	13.9747	13.3247	19.4995	17.2246
251	9.74976	18.1995	13.6497	10.7247	14.9496	18.5245	14.6246	13.3247	19.4995	17.2246
252	9.74976	17.5496	13.6497	10.7247	14.9496	18.5245	15.5996	13.6497	19.8245	16.8996
253	9.74976	18.1995	13.9747	10.7247	15.5996	18.8495	14.6246	13.3247	20.1495	16.8996
254	9.74976	17.8746	13.9747	10.7247	15.5996	18.8495	15.2746	12.9997	20.1495	16.2496
255	9.42476	17.8746	13.9747	10.7247	15.5996	18.5245	14.9496	12.9997	20.1495	16.8996
256	9.74976	18.1995	13.6497	10.7247	15.5996	18.5245	15.9246	12.6747	20.1495	17.5496
257	9.42476	17.8746	13.6497	11.3747	15.5996	18.5245	15.9246	13.3247	19.8245	16.8996
258	9.42476	18.1995	14.2996	11.0497	15.9246	18.8495	15.2746	12.9997	20.4745	16.5746
259	9.74976	18.1995	14.6246	11.3747	16.2496	18.5245	15.2746	13.6497	20.1495	16.8996
260	9.74976	18.5245	13.9747	11.6997	15.9246	18.8495	15.2746	12.9997	20.1495	15.9246
261	9.42476	18.5245	13.9747	11.3747	15.9246	18.8495	15.5996	13.3247	20.1495	16.8996
262	9.74976	18.1995	13.3247	11.3747	15.9246	18.8495	15.5996	13.6497	20.1495	16.8996
263	9.42476	18.5245	13.9747	11.0497	15.9246	18.8495	15.5996	13.6497	20.1495	16.8996
264	9.74976	17.8746	13.6497	11.3747	15.9246	18.8495	15.5996	13.6497	20.1495	17.2246
265	9.74976	18.5245	14.6246	11.3747	16.2496	18.8495	15.2746	13.6497	19.8245	15.9246
266	9.74976	17.8746	14.2996	11.3747	16.2496	18.5245	15.5996	13.6497	19.8245	16.5746
267	9.74976	18.5245	14.6246	11.3747	15.9246	18.5245	15.2746	13.3247	19.8245	17.2246
268	9.74976	18.5245	14.9496	11.3747	16.2496	18.5245	15.9246	13.6497	20.1495	17.5496
269	9.74976	18.5245	14.6246	11.0497	16.2496	18.5245	15.5996	13.6497	20.1495	17.5496
270	9.42476	18.1995	13.9747	11.3747	16.5746	18.5245	15.2746	13.9747	19.8245	16.8996
271	10.0747	18.5245	13.9747	11.3747	16.2496	18.5245	15.2746	13.6497	19.8245	16.8996
272	10.0747	18.5245	13.9747	11.3747	16.2496	18.5245	15.2746	13.6497	19.8245	17.2246
273	9.74976	18.5245	14.2996	11.0497	15.9246	18.5245	14.9496	13.9747	19.8245	17.2246
274	9.74976	18.5245	13.6497	11.0497	15.9246	18.5245	14.9496	13.9747	19.4995	16.8996
275	9.74976	18.5245	13.6497	11.3747	16.2496	18.5245	14.9496	13.9747	19.4995	16.8996
276	9.42476	18.5245	14.2996	11.0497	16.2496	18.5245	15.2746	14.2996	20.1495	16.8996
277	10.0747	18.5245	14.2996	11.0497	16.2496	18.5245	14.9496	14.2996	19.4995	16.5746
278	9.74976	18.5245	14.6246	11.3747	16.5746	18.5245	15.2746	14.2996	19.4995	17.2246
279	9.74976	18.8495	13.9747	11.3747	15.9246	18.5245	15.2746	14.6246	19.4995	17.2246
280	9.42476	18.8495	13.9747	11.3747	16.2496	18.5245	15.2746	13.9747	19.8245	17.2246
281	9.74976	18.8495	14.6246	11.0497	16.2496	18.8495	15.5996	13.6497	19.4995	16.8996
282	9.74976	18.8495	13.9747	11.3747	16.5746	18.5245	15.5996	14.2996	19.8245	16.8996
283	9.74976	18.5245	13.9747	11.0497	15.9246	18.5245	14.9496	14.2996	19.4995	17.2246
284	9.74976	19.1745	14.2996	11.0497	15.9246	18.8495	14.9496	13.9747	19.4995	17.2246
285	9.42476	18.8495	14.6246	11.0497	16.2496	18.5245	14.6246	13.9747	19.8245	17.2246
286	9.74976	18.8495	14.2996	11.3747	16.2496	18.8495	15.2746	13.6497	19.8245	17.8746
287	9.74976	18.5245	14.9496	10.7247	15.9246	18.8495	15.2746	13.9747	19.8245	17.5496
288	9.74976	18.8495	14.2996	11.6997	16.2496	18.8495	14.9496	13.9747	19.8245	17.5496
289	9.74976	19.1745	14.2996	11.6997	16.2496	18.8495	14.9496	14.2996	19.8245	17.2246
290	9.74976	18.8495	13.9747	11.3747	16.2496	18.8495	14.6246	14.2996	20.1495	17.2246
291	9.74976	18.5245	14.9496	10.7247	16.2496	18.8495	14.9496	13.9747	19.8245	17.5496
292	9.74976	18.8495	14.2996	11.0497	16.2496	18.8495	14.9496	13.9747	20.1495	17.5496
293	9.74976	18.5245	14.2996	10.3997	16.2496	18.8495	14.9496	13.3247	19.8245	17.5496
294	9.74976	18.8495	14.2996	10.7247	16.2496	18.8495	15.2746	13.9747	20.1495	17.2246
295	9.74976	18.8495	14.9496	11.0497	15.9246	18.8495	14.9496	13.3247	20.1495	17.2246
296	10.0747	18.8495	14.9496	11.0497	16.2496	18.8495	15.2746	13.6497	20.1495	17.5496
297	9.74976	18.8495	14.6246	10.7247	16.2496	18.8495	15.2746	13.3247	20.1495	17.5496
298	9.74976	18.8495	14.6246	11.0497	16.2496	19.1745	15.2746	13.3247	19.8245	17.5496
299	9.74976	18.8495	14.6246	11.0497	16.5746	18.8495	14.9496	13.6497	20.1495	17.8746
300	9.74976	18.8495	14.6246	11.0497	16.2496	18.8495	15.2746	13.6497	19.8245	17.2246
301	9.42476	18.8495	13.6497	11.3747	15.9246	19.1745	14.6246	13.6497	20.1495	16.8996
302	9.42476	18.8495	14.2996	11.0497	16.2496	18.8495	14.6246	13.6497	20.1495	17.5496
303	9.74976	18.8495	13.9747	11.3747	16.2496	18.8495	14.2996	13.6497	20.1495	16.8996
304	9.74976	18.8495	14.6246	11.0497	16.2496	18.8495	14.6246	13.3247	20.1495	16.8996
305	9.74976	19.1745	15.5996	11.0497	16.5746	19.1745	15.5996	12.9997	19.8245	16.8996
306	9.74976	19.1745	15.2746	11.0497	15.9246	18.8495	14.2996	13.3247	19.8245	17.5496
307	9.74976	18.8495	14.9496	11.0497	16.2496	19.1745	14.9496	12.6747	19.8245	17.5496
308	9.42476	18.8495	14.6246	11.0497	16.5746	18.8495	14.6246	12.6747	20.1495	17.8746
309	9.74976	18.8495	14.2996	11.3747	16.2496	18.8495	14.6246	13.3247	19.8245	17.8746
310	9.74976	18.8495	13.6497	10.7247	16.5746	18.8495	13.9747	13.9747	20.1495	17.2246
311	9.42476	18.8495	14.9496	10.3997	16.2496	18.8495	14.6246	13.6497	20.1495	17.8746
312	9.74976	18.8495	14.2996	11.0497	16.2496	18.8495	14.9496	13.6497	20.1495	17.5496
313	9.74976	18.8495	13.9747	10.7247	16.5746	18.8495	14.6246	13.3247	20.1495	17.2246
314	9.74976	19.1745	14.6246	10.7247	16.5746	18.8495	14.9496	13.3247	20.4745	17.2246
315	10.0747	18.5245	14.9496	10.7247	16.5746	18.8495	14.2996	13.6497	20.1495	17.5496
316	9.74976	18.8495	15.5996	11.0497	16.5746	18.8495	14.6246	13.9747	20.1495	17.2246
317	9.42476	18.8495	14.9496	10.7247	16.5746	18.8495	14.2996	14.2996	20.1495	17.5496
318	9.74976	19.1745	14.9496	10.3997	16.5746	18.8495	14.9496	13.3247	20.1495	16.8996
319	9.42476	18.5245	14.9496	11.0497	16.5746	18.8495	14.6246	14.6246	19.8245	18.1995
320	10.0747	19.1745	15.2746	11.3747	16.5746	18.8495	14.9496	14.2996	20.4745	17.2246
321	9.74976	18.8495	14.9496	10.7247	16.5746	19.1745	14.6246	14.2996	20.1495	17.8746
322	9.74976	19.1745	15.2746	11.0497	16.5746	18.8495	14.9496	14.6246	19.8245	17.5496
323	9.42476	19.1745	14.6246	11.3747	16.5746	19.1745	14.2996	14.6246	20.1495	17.8746
324	9.74976	18.8495	13.9747	10.7247	16.5746	19.1745	14.9496	14.9496	20.1495	17.2246
325	9.74976	18.8495	14.6246	10.7247	16.2496	18.8495	14.9496	12.9997	20.4745	17.5496
326	9.42476	18.8495	15.2746	11.3747	16.2496	19.1745	14.2996	13.3247	20.1495	17.2246
327	9.74976	19.1745	14.9496	11.6997	16.5746	19.4995	14.2996	13.3247	20.1495	17.5496
328	9.74976	19.1745	14.2996	11.3747	16.5746	19.1745	14.6246	13.9747	20.1495	17.5496
329	9.74976	18.8495	14.6246	10.7247	16.5746	18.8495	14.6246	14.6246	20.4745	17.5496
330	9.74976	19.1745	14.9496	11.3747	16.2496	19.1745	14.6246	13.6497	20.1495	17.5496
331	10.0747	18.8495	14.6246	11.3747	16.5746	19.1745	14.2996	13.6497	20.7995	17.2246
332	10.0747	18.8495	15.2746	11.6997	16.2496	19.1745	14.6246	13.9747	20.1495	17.5496
333	9.42476	19.4995	15.5996	11.6997	16.5746	18.8495	14.9496	13.9747	20.1495	17.5496
334	9.42476	19.1745	14.6246	10.3997	16.5746	18.8495	14.6246	13.9747	20.1495	17.2246
335	9.74976	19.1745	15.5996	11.6997	16.5746	18.8495	15.2746	14.2996	20.1495	17.8746
336	9.42476	19.1745	14.6246	11.6997	16.2496	19.1745	14.9496	14.6246	20.4745	17.5496
337	9.74976	19.4995	13.9747	11.3747	16.5746	19.1745	14.9496	14.2996	20.1495	17.2246
338	10.0747	18.8495	14.2996	11.3747	16.5746	18.8495	14.9496	13.9747	20.4745	17.5496
339	9.42476	18.8495	14.9496	11.3747	16.2496	19.1745	14.9496	13.3247	20.4745	17.2246
340	9.42476	18.8495	15.2746	11.6997	16.5746	19.1745	14.9496	14.2996	20.4745	17.2246
341	9.74976	18.8495	14.6246	11.3747	16.2496	19.1745	14.2996	14.6246	20.1495	16.8996
342	9.74976	19.1745	14.9496	11.3747	16.8996	19.1745	14.6246	13.9747	19.8245	17.2246
343	9.42476	19.4995	14.9496	11.3747	16.5746	19.1745	14.2996	14.2996	19.8245	17.5496
344	10.0747	19.4995	14.9496	11.0497	16.5746	19.1745	14.6246	13.9747	19.8245	17.2246
345	9.74976	19.4995	14.9496	11.0497	16.5746	18.8495	14.6246	14.9496	20.1495	17.5496
346	9.74976	19.4995	14.9496	11.0497	16.5746	19.1745	14.6246	13.9747	20.1495	17.5496
347	9.74976	18.8495	14.6246	11.3747	16.5746	19.1745	14.6246	13.6497	19.8245	17.5496
348	9.74976	19.1745	14.9496	11.6997	16.5746	18.8495	14.6246	13.3247	20.4745	17.2246
349	9.74976	19.1745	14.9496	11.0497	16.5746	18.8495	14.2996	13.3247	19.8245	17.5496
350	9.74976	19.4995	14.6246	11.6997	16.5746	19.1745	14.9496	13.6497	19.8245	17.5496
351	9.74976	19.1745	14.9496	11.6997	16.2496	19.1745	14.6246	14.2996	20.1495	16.8996
352	9.74976	19.4995	15.2746	12.0247	16.2496	18.8495	14.2996	14.6246	19.8245	17.5496
353	9.74976	19.1745	14.9496	11.6997	16.5746	19.1745	14.6246	14.6246	20.1495	17.2246
354	9.42476	19.4995	15.2746	12.0247	16.5746	19.1745	14.2996	14.6246	19.8245	17.5496
355	9.42476	19.1745	14.9496	11.3747	16.5746	18.8495	14.9496	14.2996	20.1495	17.5496
356	9.74976	19.4995	14.6246	11.6997	16.5746	19.4995	14.6246	14.2996	20.1495	17.5496
357	9.74976	19.4995	14.6246	11.3747	16.5746	18.8495	14.6246	14.2996	19.8245	17.5496
358	9.74976	19.1745	14.9496	11.3747	16.2496	19.1745	14.9496	14.2996	20.4745	17.5496
359	9.74976	19.4995	14.2996	11.3747	16.5746	18.8495	14.9496	14.6246	20.1495	16.5746
360	10.0747	19.1745	14.9496	11.6997	16.2496	19.1745	14.6246	14.2996	20.4745	17.8746
361	9.74976	19.4995	15.5996	12.0247	16.2496	19.1745	14.2996	14.2996	20.4745	17.8746
362	9.74976	19.4995	15.2746	11.3747	16.2496	18.8495	14.6246	13.9747	20.1495	17.2246
363	9.42476	19.4995	14.9496	11.6997	16.5746	18.8495	14.2996	14.2996	20.1495	17.2246
364	9.42476	19.4995	14.9496	12.0247	16.2496	18.8495	14.6246	14.9496	20.4745	18.1995
365	9.42476	19.1745	14.9496	12.3497	16.5746	19.1745	14.6246	14.6246	19.8245	17.8746
366	10.0747	19.4995	13.6497	12.0247	16.5746	18.8495	14.9496	14.9496	20.1495	17.5496
367	9.42476	19.4995	15.5996	11.6997	16.5746	19.1745	14.6246	14.6246	20.4745	17.8746
368	9.42476	19.1745	15.2746	11.6997	16.5746	18.8495	14.2996	14.6246	20.1495	17.5496
369	9.74976	19.1745	15.5996	12.3497	16.5746	18.8495	14.9496	14.6246	20.1495	16.8996
370	9.42476	19.4995	14.9496	11.6997	16.5746	18.8495	14.6246	14.9496	20.1495	17.8746
371	10.0747	19.8245	15.9246	11.6997	16.2496	18.8495	14.2996	14.6246	20.1495	17.5496
372	10.0747	19.4995	15.5996	12.0247	16.5746	18.8495	14.6246	14.9496	20.4745	17.5496
373	10.0747	19.4995	15.2746	11.6997	16.8996	18.8495	14.2996	14.6246	20.1495	16.5746
374	10.0747	19.1745	13.9747	11.6997	16.5746	18.8495	14.9496	13.6497	20.1495	17.2246
375	9.42476	19.1745	15.5996	12.0247	16.5746	18.8495	14.2996	14.2996	20.4745	17.5496
376	9.74976	19.4995	14.6246	11.6997	16.2496	18.8495	14.6246	14.6246	20.1495	17.8746
377	9.42476	19.4995	15.5996	12.0247	16.5746	18.8495	14.6246	13.9747	20.4745	17.5496
378	9.74976	19.4995	15.5996	11.6997	16.5746	19.1745	14.6246	13.6497	20.1495	17.5496
379	9.42476	19.8245	15.2746	11.6997	16.5746	18.8495	14.2996	14.2996	20.4745	17.8746
380	9.74976	19.1745	14.9496	11.6997	16.5746	19.1745	14.6246	14.2996	20.1495	17.5496
381	9.74976	19.4995	15.9246	12.0247	16.5746	19.1745	14.2996	13.9747	19.8245	17.2246
382	10.0747	19.1745	14.6246	11.6997	16.5746	19.1745	14.6246	13.9747	20.1495	17.8746
383	9.74976	19.4995	15.9246	12.0247	16.8996	19.1745	14.6246	13.3247	19.8245	17.8746
384	9.74976	19.4995	15.5996	12.0247	16.5746	19.1745	14.2996	13.6497	19.8245	17.2246
385	9.42476	19.4995	14.9496	11.6997	16.5746	19.1745	14.9496	14.2996	20.1495	18.1995
386	9.74976	19.4995	15.5996	12.3497	16.5746	19.1745	14.2996	13.9747	20.4745	17.8746
387	10.0747	19.4995	14.9496	12.0247	16.5746	18.8495	13.9747	13.6497	20.1495	17.5496
388	9.74976	19.1745	15.5996	12.0247	16.5746	19.1745	14.2996	13.9747	20.1495	17.5496
389	10.0747	19.4995	14.9496	11.6997	16.5746	19.1745	14.6246	14.2996	20.1495	17.5496
390	9.74976	19.4995	15.2746	11.6997	16.5746	18.8495	14.2996	14.6246	20.1495	17.5496
391	9.74976	19.8245	15.9246	12.0247	16.5746	18.8495	14.6246	13.9747	19.8245	18.1995
392	9.74976	19.4995	15.5996	11.6997	16.5746	19.1745	14.2996	14.6246	19.8245	18.1995
393	9.74976	19.4995	15.2746	12.0247	16.5746	18.8495	14.9496	14.6246	20.4745	17.5496
394	9.74976	19.4995	14.9496	11.6997	16.5746	18.8495	14.6246	14.6246	20.1495	17.2246
395	9.74976	19.4995	15.2746	12.0247	16.5746	18.8495	14.6246	13.3247	20.1495	17.2246
396	9.74976	19.1745	14.9496	12.0247	16.2496	18.8495	14.6246	13.6497	20.1495	16.5746
397	9.74976	19.4995	14.9496	12.0247	16.2496	18.8495	14.6246	13.9747	20.1495	17.5496
398	10.0747	19.1745	15.2746	11.6997	16.5746	18.8495	14.6246	13.3247	20.1495	17.8746
399	10.0747	19.1745	14.6246	11.6997	16.5746	19.1745	15.2746	13.3247	20.1495	17.5496
400	9.74976	19.4995	15.5996	12.0247	16.5746	18.8495	14.6246	13.3247	19.8245	17.8746
401	9.74976	19.4995	15.2746	12.0247	16.5746	19.1745	14.9496	12.9997	20.4745	17.2246
402	9.74976	19.4995	15.2746	11.6997	16.8996	18.8495	14.9496	12.9997	20.1495	17.5496
403	9.74976	19.4995	14.6246	12.0247	16.5746	18.8495	14.6246	12.6747	20.1495	17.5496
404	9.74976	19.1745	15.2746	11.6997	16.8996	19.1745	14.9496	13.3247	19.4995	17.2246
405	9.74976	19.4995	15.2746	12.0247	16.5746	18.8495	14.6246	13.3247	20.1495	17.5496
406	9.74976	19.4995	15.2746	12.3497	16.5746	18.5245	14.2996	12.9997	20.4745	17.5496
407	10.0747	19.4995	15.2746	12.0247	16.5746	18.8495	14.9496	13.6497	20.4745	17.5496
408	10.0747	19.4995	14.9496	12.0247	16.8996	18.8495	14.2996	13.3247	19.8245	17.8746
409	9.74976	19.8245	14.9496	12.3497	16.5746	19.1745	14.6246	13.6497	20.1495	17.5496
410	10.0747	19.4995	14.9496	12.0247	16.2496	18.8495	14.6246	13.6497	20.4745	18.1995
411	10.0747	19.4995	14.6246	11.6997	16.5746	18.8495	14.6246	13.9747	19.8245	17.8746
412	9.74976	19.4995	15.2746	12.0247	16.2496	18.8495	14.6246	13.9747	20.1495	17.5496
413	10.0747	19.4995	14.2996	12.0247	16.2496	18.8495	15.2746	13.9747	20.1495	18.1995
414	9.74976	19.4995	15.5996	12.3497	16.5746	18.8495	14.6246	13.6497	20.1495	17.2246
415	9.74976	19.4995	14.9496	12.0247	16.2496	18.8495	14.6246	13.9747	20.4745	18.1995
416	9.74976	19.4995	14.9496	12.0247	16.2496	18.8495	14.6246	13.6497	20.4745	17.8746
417	9.74976	19.4995	14.9496	12.0247	16.2496	18.8495	14.6246	13.6497	20.1495	17.2246
418	9.74976	19.8245	15.2746	12.3497	16.2496	18.8495	14.6246	13.9747	20.4745	17.8746
419	9.42476	19.4995	15.5996	12.0247	16.2496	19.1745	14.9496	13.9747	20.1495	18.1995
420	10.0747	19.4995	15.5996	12.0247	16.2496	18.5245	14.6246	13.6497	20.7995	17.8746
421	9.74976	19.4995	15.5996	12.3497	16.2496	18.8495	14.9496	14.2996	19.8245	17.8746
422	9.74976	19.4995	14.9496	12.0247	15.9246	18.8495	14.9496	13.9747	19.8245	18.1995
423	9.74976	19.4995	14.9496	12.0247	16.2496	19.1745	14.6246	13.6497	20.1495	17.8746
424	9.74976	19.4995	14.6246	12.3497	15.9246	18.5245	14.2996	13.3247	20.4745	18.1995
425	9.74976	19.4995	15.2746	12.0247	16.2496	19.1745	14.6246	13.9747	20.1495	18.5245
426	9.74976	19.8245	14.6246	12.3497	16.2496	18.8495	14.2996	13.6497	20.1495	17.5496
427	9.74976	19.4995	15.2746	12.0247	16.5746	18.8495	14.6246	13.3247	20.1495	17.2246
428	9.42476	19.4995	14.9496	12.0247	16.2496	18.5245	14.9496	13.3247	20.4745	17.5496
429	9.74976	19.8245	15.5996	12.0247	15.9246	18.5245	14.9496	13.3247	20.1495	17.8746
430	9.74976	19.4995	15.5996	12.0247	16.2496	18.8495	14.9496	13.3247	20.1495	17.8746
431	9.74976	19.8245	14.2996	12.0247	16.2496	18.8495	14.6246	13.6497	20.1495	17.2246
432	9.74976	19.4995	14.6246	12.3497	16.2496	18.5245	14.2996	13.6497	20.1495	17.5496
433	9.74976	19.4995	15.9246	12.0247	16.5746	18.5245	14.9496	13.9747	20.1495	17.8746
434	9.74976	20.1495	14.9496	12.0247	16.2496	18.5245	14.9496	14.6246	20.1495	17.2246
435	9.74976	19.4995	15.2746	11.6997	16.5746	18.8495	14.6246	14.6246	20.1495	18.1995
436	9.74976	19.4995	15.2746	12.0247	16.2496	18.5245	14.6246	14.2996	20.4745	17.8746
437	9.74976	19.4995	14.9496	12.0247	16.5746	18.5245	14.6246	14.6246	20.1495	17.8746
438	9.74976	19.4995	14.9496	12.0247	16.2496	18.5245	14.9496	14.9496	19.8245	17.8746
439	9.74976	19.4995	14.6246	12.6747	16.8996	18.8495	13.9747	14.2996	20.4745	17.8746
440	9.74976	19.8245	15.2746	11.6997	16.5746	18.8495	14.6246	14.6246	19.8245	18.1995
441	9.74976	19.4995	15.9246	12.0247	16.2496	18.5245	14.6246	14.2996	19.8245	17.5496
442	9.74976	19.4995	14.9496	11.6997	16.2496	18.5245	14.6246	14.2996	20.1495	17.5496
443	9.74976	19.8245	15.9246	11.6997	16.5746	18.5245	14.2996	13.9747	20.4745	17.8746
444	9.74976	19.8245	15.2746	12.3497	16.2496	18.8495	14.9496	13.3247	20.1495	17.5496
445	9.74976	19.4995	15.2746	12.0247	16.2496	18.5245	14.2996	13.9747	20.1495	17.8746
446	9.42476	19.4995	15.2746	12.3497	16.2496	18.8495	14.9496	12.9997	20.1495	17.5496
447	9.74976	19.8245	14.9496	12.3497	16.2496	18.5245	14.9496	13.3247	20.7995	17.8746
448	9.74976	19.8245	15.2746	12.6747	16.5746	18.8495	14.9496	13.9747	20.4745	17.5496
449	9.74976	20.1495	15.5996	11.0497	16.2496	19.1745	14.9496	13.6497	20.1495	17.8746
450	9.74976	19.8245	14.9496	12.3497	16.5746	18.8495	14.9496	13.6497	19.8245	17.5496
451	9.74976	19.8245	14.2996	12.3497	16.8996	18.8495	14.9496	13.6497	20.1495	17.5496
452	9.74976	19.8245	14.9496	12.6747	16.8996	18.8495	14.9496	14.6246	20.4745	18.1995
453	9.74976	19.4995	14.6246	12.3497	16.2496	18.8495	14.9496	13.6497	20.4745	17.8746
454	9.74976	19.1745	15.2746	11.3747	16.8996	18.8495	14.9496	14.2996	20.1495	18.5245
455	9.74976	19.8245	14.6246	12.6747	16.2496	18.8495	14.9496	13.6497	20.1495	17.5496
456	9.74976	19.4995	14.9496	11.6997	16.5746	18.5245	14.6246	14.2996	20.1495	17.2246
457	9.74976	19.8245	15.2746	11.6997	16.5746	19.1745	14.9496	13.9747	20.1495	18.1995
458	9.42476	19.8245	15.2746	12.0247	16.5746	18.5245	14.9496	13.9747	20.4745	16.8996
459	9.74976	19.4995	15.5996	11.6997	16.5746	18.8495	15.2746	13.9747	20.4745	17.8746
460	9.74976	19.8245	14.9496	12.3497	16.2496	18.5245	14.6246	13.9747	20.4745	17.8746
461	9.74976	19.4995	15.2746	11.6997	16.2496	19.1745	14.6246	14.2996	20.1495	17.5496
462	9.74976	19.4995	15.5996	12.0247	16.5746	18.8495	14.9496	14.2996	20.4745	17.8746
463	9.42476	19.4995	15.2746	12.0247	16.2496	19.1745	14.6246	13.9747	20.1495	17.8746
464	9.74976	19.8245	15.5996	12.0247	16.2496	19.1745	14.6246	14.2996	20.1495	17.2246
465	9.74976	19.8245	15.5996	12.3497	16.2496	19.1745	15.2746	14.2996	20.1495	18.1995
466	9.74976	19.8245	15.5996	12.3497	16.5746	19.4995	14.9496	14.6246	20.4745	17.2246
467	9.74976	19.8245	14.9496	12.3497	16.2496	19.1745	14.2996	14.2996	20.1495	17.8746
468	9.74976	19.8245	15.2746	12.6747	16.2496	19.1745	15.2746	14.2996	20.4745	17.5496
469	10.0747	20.1495	14.9496	12.3497	16.5746	19.1745	15.2746	14.2996	19.8245	16.8996
470	10.0747	19.8245	15.5996	12.3497	16.5746	19.1745	14.6246	14.2996	20.1495	18.1995
471	9.74976	19.8245	14.9496	12.3497	16.2496	19.1745	14.9496	14.2996	20.4745	17.5496
472	10.0747	19.8245	15.2746	12.0247	16.2496	18.8495	14.9496	13.9747	20.1495	17.8746
473	10.0747	20.1495	15.2746	12.6747	16.5746	18.8495	15.2746	14.2996	19.8245	18.1995
474	9.74976	19.4995	15.2746	12.3497	16.5746	19.4995	14.9496	14.2996	20.4745	17.8746
475	10.0747	20.1495	15.2746	12.3497	16.2496	19.1745	15.2746	14.2996	19.8245	18.1995
476	9.74976	19.8245	15.5996	12.0247	16.2496	19.4995	14.9496	14.2996	20.4745	17.8746
477	9.74976	19.4995	16.2496	12.6747	16.5746	19.1745	14.9496	13.9747	20.4745	18.1995
478	9.74976	19.8245	15.9246	12.3497	16.2496	19.1745	14.6246	14.2996	19.8245	17.8746
479	9.74976	20.1495	16.2496	12.6747	16.5746	19.1745	14.9496	13.9747	20.4745	18.1995
480	9.74976	19.8245	15.5996	12.3497	16.5746	19.1745	14.2996	13.9747	20.4745	17.8746
481	9.74976	19.8245	15.5996	12.3497	16.5746	18.8495	15.2746	14.2996	20.4745	18.5245
482	9.74976	19.8245	16.5746	12.3497	16.5746	18.8495	14.9496	13.6497	20.1495	17.8746
483	9.74976	19.8245	16.5746	12.3497	15.9246	19.1745	14.9496	13.3247	19.8245	17.8746
484	9.74976	19.4995	16.8996	12.3497	16.2496	19.1745	14.9496	14.2996	20.1495	18.1995
485	9.74976	19.8245	16.2496	12.6747	16.2496	19.1745	15.2746	13.6497	20.4745	17.8746
486	9.74976	19.8245	16.5746	12.3497	15.9246	18.8495	14.9496	13.3247	20.4745	17.2246
487	9.74976	19.8245	15.5996	12.0247	16.2496	19.1745	15.2746	13.9747	20.4745	17.5496
488	9.74976	19.8245	16.2496	12.0247	16.2496	19.1745	14.6246	13.6497	19.8245	17.5496
489	9.74976	19.4995	15.2746	11.6997	16.2496	18.8495	14.9496	13.9747	20.1495	18.5245
490	9.74976	19.4995	15.9246	12.6747	16.2496	18.8495	15.2746	13.6497	20.1495	18.1995
491	9.74976	19.4995	16.5746	11.6997	15.9246	18.8495	14.9496	13.6497	20.4745	18.1995
492	9.74976	19.4995	15.9246	12.3497	16.5746	18.8495	14.9496	13.6497	20.4745	17.8746
493	9.74976	19.4995	16.8996	12.0247	16.2496	19.1745	14.6246	13.9747	19.8245	17.8746
494	9.74976	19.8245	16.8996	12.3497	15.9246	19.1745	14.9496	14.9496	20.1495	18.1995
495	9.74976	19.8245	15.5996	12.6747	15.9246	18.8495	14.6246	14.6246	19.8245	17.5496
496	9.74976	19.8245	16.5746	12.9997	15.9246	18.8495	15.2746	13.9747	19.8245	18.1995
497	9.74976	19.8245	15.9246	12.3497	16.2496	18.5245	14.6246	13.6497	19.8245	17.5496
498	10.0747	19.4995	14.6246	12.0247	16.2496	18.8495	14.2996	13.9747	20.1495	17.8746
499	10.0747	19.4995	15.2746	12.0247	16.5746	18.8495	15.2746	13.9747	19.8245	18.5245
500	9.74976	20.1495	15.9246	12.6747	16.5746	18.8495	14.9496	13.3247	20.1495	18.1995
501	9.74976	19.8245	15.9246	12.3497	15.9246	18.8495	14.9496	13.3247	20.1495	18.1995
502	9.74976	20.1495	15.9246	12.3497	15.9246	19.1745	14.6246	13.3247	20.1495	18.1995
503	10.0747	19.8245	14.6246	12.3497	15.5996	19.1745	14.9496	13.9747	19.8245	17.5496
504	10.0747	20.1495	16.2496	12.3497	15.9246	18.8495	14.6246	13.6497	20.1495	18.1995
505	9.74976	19.8245	15.2746	12.3497	16.2496	18.8495	14.6246	13.9747	20.1495	17.8746
506	10.0747	19.4995	15.5996	12.0247	15.9246	18.8495	14.9496	13.6497	20.4745	18.1995
507	9.74976	20.1495	15.9246	12.0247	16.2496	18.8495	14.9496	14.2996	20.1495	18.1995
508	9.74976	20.1495	16.2496	12.3497	16.2496	18.8495	14.9496	13.9747	20.4745	18.5245
509	9.74976	19.4995	15.9246	12.0247	16.2496	18.8495	14.9496	13.9747	20.1495	17.8746
510	9.74976	19.8245	16.2496	12.0247	15.9246	18.8495	14.9496	13.9747	20.1495	17.8746
511	9.74976	19.8245	15.5996	12.6747	16.2496	18.8495	14.9496	14.2996	19.8245	18.1995
512	9.74976	19.8245	14.9496	12.0247	15.9246	18.8495	14.9496	14.2996	20.1495	17.5496
513	10.0747	20.1495	15.5996	12.3497	16.2496	18.8495	14.6246	14.6246	20.7995	18.8495
514	9.74976	19.8245	16.5746	12.3497	15.9246	18.8495	14.9496	13.9747	20.4745	17.8746
515	9.74976	19.4995	15.2746	12.0247	15.9246	18.5245	14.2996	13.9747	19.8245	17.5496
516	10.0747	19.8245	16.2496	11.6997	16.8996	18.5245	14.9496	13.6497	20.1495	17.5496
517	9.74976	19.8245	16.5746	11.6997	16.8996	18.5245	14.9496	13.6497	20.1495	18.1995
518	9.74976	19.4995	16.2496	12.3497	16.5746	18.5245	14.6246	13.3247	20.1495	17.8746
519	9.74976	19.8245	14.6246	12.3497	16.8996	18.5245	14.9496	13.6497	20.1495	18.1995
520	9.74976	19.8245	14.6246	12.3497	16.8996	18.5245	14.9496	13.6497	20.4745	17.8746
521	9.74976	19.8245	17.2246	12.3497	17.2246	18.5245	15.2746	13.6497	20.4745	18.1995
522	10.0747	19.4995	15.5996	12.0247	16.8996	18.5245	14.9496	13.3247	19.4995	18.8495
523	9.42476	19.8245	14.9496	11.3747	17.2246	18.5245	14.6246	12.9997	20.1495	18.1995
524	9.74976	19.8245	16.2496	11.3747	17.2246	18.5245	14.6246	13.3247	20.4745	18.5245
525	9.74976	19.8245	16.2496	12.3497	16.8996	18.8495	14.6246	13.6497	20.1495	18.1995
526	9.74976	19.8245	16.2496	11.6997	16.8996	18.5245	14.9496	13.6497	20.1495	18.1995
527	10.0747	19.8245	16.2496	11.6997	16.8996	18.8495	14.9496	13.3247	19.8245	17.5496
528	10.0747	20.1495	16.5746	12.3497	16.8996	18.5245	14.9496	13.3247	20.1495	17.5496
529	9.74976	20.1495	16.2496	12.0247	16.8996	18.5245	15.2746	14.2996	20.1495	17.5496
530	10.0747	20.1495	15.9246	11.6997	16.5746	18.5245	14.6246	14.2996	20.1495	18.1995
531	9.74976	20.1495	16.2496	12.0247	16.8996	18.5245	15.2746	14.6246	19.8245	18.1995
532	9.74976	19.8245	15.9246	11.6997	16.5746	18.5245	14.6246	14.2996	19.8245	18.8495
533	9.42476	19.8245	15.5996	11.6997	16.5746	18.5245	14.6246	14.6246	19.8245	17.8746
534	9.42476	20.1495	16.2496	12.0247	16.5746	18.5245	14.9496	14.2996	20.1495	17.8746
535	9.74976	19.8245	15.5996	12.0247	16.5746	18.5245	14.6246	14.2996	19.8245	17.8746
536	9.74976	20.1495	15.9246	11.6997	16.8996	18.5245	14.6246	14.9496	19.8245	18.1995
537	9.74976	20.1495	16.8996	12.6747	16.5746	18.5245	14.6246	14.2996	20.1495	18.5245
538	9.74976	19.8245	15.2746	12.3497	16.8996	18.5245	14.6246	13.9747	20.1495	18.8495
539	9.74976	20.1495	15.2746	12.0247	16.8996	18.1995	14.9496	13.9747	20.1495	17.8746
540	9.74976	20.1495	16.2496	12.3497	16.5746	18.1995	14.6246	14.6246	20.1495	17.8746
541	9.74976	20.1495	16.5746	12.6747	16.5746	18.5245	14.6246	13.9747	19.8245	18.1995
542	9.74976	19.8245	16.2496	12.0247	16.5746	18.5245	14.6246	14.2996	20.1495	17.2246
543	9.74976	20.1495	15.5996	12.3497	17.2246	18.5245	14.6246	13.9747	19.8245	17.8746
544	9.74976	19.8245	15.5996	12.6747	16.8996	18.5245	14.6246	13.9747	19.8245	18.1995
545	10.0747	20.1495	15.5996	12.3497	16.8996	18.5245	14.2996	13.6497	19.8245	17.5496
546	9.74976	19.8245	15.9246	12.0247	16.5746	18.5245	14.6246	14.2996	20.4745	18.1995
547	9.74976	20.1495	15.9246	12.3497	16.5746	18.5245	14.6246	13.6497	20.4745	18.1995
548	9.74976	20.1495	15.2746	12.0247	16.8996	18.5245	14.9496	13.9747	19.8245	18.5245
549	9.74976	20.1495	15.9246	12.0247	16.5746	18.5245	14.6246	13.9747	19.8245	18.8495
550	9.74976	20.1495	15.9246	12.6747	16.5746	18.5245	14.6246	14.2996	19.8245	17.8746
551	9.74976	20.1495	15.9246	12.3497	16.5746	18.5245	14.9496	13.6497	19.4995	17.5496
552	9.42476	20.1495	16.2496	12.0247	16.8996	18.5245	14.2996	13.9747	19.8245	18.5245
553	9.74976	20.1495	16.8996	12.0247	16.5746	18.5245	14.9496	13.3247	20.1495	17.5496
554	9.74976	20.1495	15.9246	12.6747	16.8996	18.5245	14.6246	13.9747	20.1495	18.1995
555	9.74976	20.1495	16.2496	12.6747	16.5746	18.5245	14.6246	13.3247	19.8245	18.8495
556	9.42476	20.1495	15.5996	12.6747	16.5746	18.8495	14.6246	13.3247	20.1495	17.5496
557	9.74976	19.8245	16.5746	11.6997	16.5746	18.8495	14.9496	13.3247	19.8245	18.5245
558	9.42476	20.1495	16.2496	12.0247	16.5746	18.5245	14.2996	13.9747	19.4995	17.8746
559	9.74976	20.1495	15.9246	12.3497	16.8996	18.5245	14.6246	13.3247	19.8245	17.5496
560	9.74976	19.8245	14.6246	11.6997	16.5746	18.5245	14.6246	13.3247	19.8245	18.1995
561	9.74976	20.4745	16.5746	12.3497	16.8996	18.5245	14.9496	13.6497	20.4745	17.8746
562	9.74976	20.1495	15.5996	12.6747	16.8996	18.5245	14.9496	13.6497	20.1495	17.8746
563	9.74976	20.4745	15.9246	12.6747	16.5746	18.5245	14.9496	13.6497	20.1495	17.8746
564	9.74976	19.8245	16.5746	12.3497	16.5746	18.5245	14.9496	13.9747	20.4745	18.1995
565	9.74976	20.4745	16.5746	12.3497	16.5746	18.5245	14.6246	13.9747	20.1495	18.1995
566	9.74976	19.8245	15.9246	12.3497	16.5746	18.5245	14.2996	13.9747	20.1495	17.8746
567	9.74976	20.1495	15.5996	12.3497	16.5746	18.5245	14.9496	14.2996	20.7995	18.5245
568	9.74976	19.8245	15.5996	12.6747	16.8996	18.5245	14.6246	13.9747	20.1495	18.8495
569	9.74976	20.1495	15.9246	12.3497	16.5746	18.8495	15.2746	13.9747	20.1495	18.5245
570	9.42476	19.8245	15.9246	12.3497	16.5746	18.5245	14.6246	13.9747	20.1495	17.8746
571	9.74976	20.1495	16.2496	12.0247	16.5746	18.5245	14.2996	13.9747	19.8245	18.1995
572	9.74976	20.1495	15.9246	12.3497	16.5746	18.1995	14.6246	14.2996	20.4745	17.5496
573	9.74976	19.8245	16.5746	12.9997	16.5746	18.5245	14.9496	13.6497	20.4745	17.8746
574	9.74976	20.4745	15.5996	12.3497	16.5746	18.5245	14.9496	14.6246	20.4745	18.1995
575	10.0747	20.1495	15.5996	12.3497	16.5746	18.5245	14.6246	13.9747	20.7995	18.1995
576	10.0747	20.1495	15.9246	12.9997	16.5746	18.1995	14.2996	14.2996	19.8245	18.5245
577	9.74976	19.8245	15.5996	12.6747	16.5746	18.5245	14.2996	13.9747	20.4745	17.8746
578	10.0747	19.8245	16.8996	12.6747	16.5746	18.5245	14.2996	14.6246	20.7995	17.8746
579	9.74976	19.8245	16.2496	12.6747	16.5746	18.5245	14.9496	14.9496	20.7995	18.1995
580	9.74976	19.8245	16.2496	12.6747	16.5746	18.5245	14.9496	14.6246	20.1495	18.1995
581	9.74976	20.1495	16.2496	12.3497	16.5746	18.8495	14.9496	14.2996	20.7995	18.1995
582	9.74976	20.1495	16.2496	12.3497	16.5746	18.1995	14.6246	14.6246	20.4745	18.1995
583	10.0747	20.1495	15.9246	12.6747	16.5746	18.1995	14.6246	13.9747	20.4745	18.5245
584	9.74976	20.1495	15.5996	12.6747	16.5746	18.5245	14.9496	13.9747	20.4745	17.8746
585	9.42476	19.8245	16.5746	12.3497	16.5746	18.8495	15.2746	13.9747	20.4745	17.8746
586	9.74976	20.1495	16.2496	12.6747	16.5746	18.8495	14.9496	14.2996	20.4745	18.1995
587	9.74976	19.8245	16.2496	12.6747	16.5746	18.5245	14.9496	14.2996	20.7995	18.5245
588	9.74976	20.1495	16.5746	12.3497	16.5746	18.5245	14.6246	13.6497	20.4745	17.5496
589	9.74976	19.8245	16.2496	12.6747	16.5746	18.1995	14.6246	13.6497	20.1495	18.1995
590	10.0747	20.1495	16.5746	12.3497	16.8996	18.1995	14.6246	14.2996	20.7995	18.1995
591	10.0747	19.8245	16.2496	12.6747	16.5746	18.5245	14.9496	13.9747	20.7995	18.5245
592	9.74976	20.1495	15.9246	12.6747	16.8996	18.8495	14.9496	13.9747	20.7995	17.5496
593	10.0747	20.1495	15.9246	12.3497	16.5746	18.1995	14.9496	14.2996	20.7995	18.1995
594	10.0747	20.4745	15.5996	12.3497	16.5746	18.8495	14.6246	14.2996	20.4745	17.8746
595	9.74976	20.1495	16.2496	12.6747	16.8996	18.8495	14.6246	13.6497	20.7995	17.8746
596	9.09977	20.1495	15.9246	12.3497	16.5746	18.5245	14.6246	13.9747	20.4745	18.1995
597	9.26227	20.1495	15.5996	12.0247	16.5746	18.5245	14.6246	14.2996	20.7995	18.1995
598	9.26227	20.1495	16.2496	12.6747	16.8996	18.5245	14.9496	14.2996	20.7995	18.1995
599	9.26227	20.1495	15.9246	12.0247	16.5746	18.5245	14.9496	14.2996	20.7995	17.8746
600	9.42476	19.8245	15.9246	12.0247	16.5746	18.1995	14.9496	14.2996	20.7995	17.8746
601	10.0747	20.1495	15.9246	12.3497	16.8996	18.5245	14.6246	14.2996	20.7995	17.5496
602	10.0747	20.1495	16.2496	12.3497	16.8996	18.5245	14.9496	13.9747	20.4745	17.8746
603	10.0747	20.1495	15.9246	12.0247	16.5746	18.8495	15.2746	13.9747	20.7995	17.8746
604	10.0747	20.1495	15.9246	11.6997	16.5746	18.5245	14.9496	13.9747	20.7995	17.5496
605	10.0747	20.1495	16.5746	12.0247	16.5746	18.5245	14.6246	13.9747	20.4745	18.5245
606	10.0747	20.1495	16.2496	12.0247	16.5746	18.5245	14.9496	13.9747	20.7995	18.1995
607	10.0747	20.1495	15.5996	12.3497	16.5746	18.5245	14.9496	13.6497	21.1245	18.1995
608	10.0747	20.1495	16.5746	12.3497	16.5746	18.8495	14.6246	13.9747	20.7995	17.8746
609	10.0747	19.8245	15.2746	12.9997	16.5746	18.8495	14.9496	13.6497	20.4745	18.1995
610	10.0747	20.1495	15.5996	12.6747	16.5746	18.8495	15.2746	13.6497	21.1245	18.5245
611	9.74976	19.8245	16.2496	12.3497	16.8996	18.8495	15.2746	13.6497	20.4745	17.8746
612	10.0747	20.1495	15.9246	12.3497	16.8996	19.1745	14.9496	13.6497	20.4745	17.8746
613	10.0747	20.1495	15.9246	12.0247	16.8996	18.5245	14.9496	13.6497	20.7995	18.5245
614	10.0747	19.8245	15.9246	12.6747	16.8996	18.8495	15.2746	13.9747	20.4745	18.1995
615	10.0747	20.1495	15.9246	12.6747	16.5746	18.8495	14.9496	14.2996	20.7995	17.5496
616	10.0747	19.8245	15.9246	12.9997	16.8996	18.8495	14.6246	14.2996	21.1245	18.1995
617	10.0747	19.8245	15.9246	12.3497	16.5746	18.8495	14.9496	14.2996	20.4745	17.2246
618	10.0747	20.1495	14.9496	12.9997	16.8996	18.8495	14.9496	13.9747	21.1245	17.8746
619	10.0747	20.1495	15.2746	12.3497	16.8996	18.8495	14.9496	14.2996	20.7995	17.8746
620	10.0747	20.1495	15.5996	12.9997	16.8996	19.1745	14.6246	14.6246	20.4745	17.8746
621	9.74976	19.8245	16.2496	12.3497	16.8996	19.1745	14.9496	14.6246	20.7995	17.8746
622	10.0747	19.8245	14.9496	12.9997	16.8996	19.1745	14.9496	14.2996	20.1495	18.1995
623	10.0747	20.1495	15.9246	12.9997	16.8996	18.8495	14.9496	14.2996	20.7995	18.1995
624	10.0747	19.8245	15.9246	12.9997	16.8996	19.1745	14.9496	14.6246	20.7995	17.5496
625	9.74976	19.8245	15.9246	12.3497	16.8996	18.8495	14.6246	14.2996	20.4745	18.5245
626	10.0747	20.1495	15.9246	12.9997	16.5746	18.8495	14.6246	13.9747	20.1495	18.1995
627	10.0747	19.8245	16.2496	12.6747	16.8996	18.8495	14.6246	14.6246	20.4745	17.8746
628	10.0747	20.1495	15.9246	12.3497	16.8996	19.1745	14.6246	14.2996	20.7995	18.5245
629	10.0747	20.1495	15.9246	12.9997	16.8996	18.8495	14.6246	14.2996	21.1245	18.1995
630	10.0747	20.1495	15.2746	12.9997	16.8996	18.8495	14.6246	13.9747	20.7995	17.8746
631	10.0747	20.1495	15.2746	12.9997	16.5746	18.8495	14.6246	13.9747	20.1495	17.5496
632	9.74976	20.1495	15.9246	12.9997	16.8996	18.8495	14.9496	14.2996	20.1495	17.5496
633	10.0747	19.8245	15.9246	12.9997	16.8996	19.1745	14.9496	14.2996	20.4745	17.8746
634	10.0747	20.4745	15.9246	12.6747	16.5746	18.8495	14.9496	13.9747	20.4745	18.1995
635	10.0747	19.8245	16.2496	12.6747	16.5746	18.8495	15.2746	14.2996	20.4745	17.5496
636	9.74976	20.1495	16.2496	12.9997	16.5746	18.8495	14.6246	13.6497	20.7995	17.8746
637	10.0747	20.1495	15.9246	12.0247	16.5746	18.8495	14.9496	13.9747	20.7995	18.1995
638	10.0747	20.1495	15.9246	12.6747	16.8996	18.8495	15.2746	14.6246	20.4745	18.1995
639	9.74976	20.1495	15.5996	12.9997	16.5746	18.8495	14.9496	13.6497	20.7995	18.1995
640	10.0747	20.1495	15.9246	12.6747	16.8996	18.8495	14.6246	14.2996	20.4745	17.8746
641	9.74976	20.1495	15.9246	12.3497	16.8996	18.8495	14.9496	12.9997	21.1245	18.1995
642	9.74976	20.1495	15.5996	12.6747	16.8996	18.8495	15.2746	13.3247	20.4745	17.5496
643	10.0747	20.4745	15.5996	12.3497	16.5746	19.1745	14.9496	14.2996	20.7995	17.8746
644	10.0747	20.4745	15.9246	12.0247	16.5746	18.8495	15.2746	13.9747	20.4745	17.8746
645	9.74976	19.8245	15.9246	12.9997	16.5746	18.8495	14.9496	13.9747	20.7995	17.8746
646	9.74976	20.4745	15.9246	12.9997	16.8996	18.8495	14.9496	13.9747	20.4745	18.1995
647	9.74976	20.4745	15.5996	12.6747	16.8996	18.8495	14.9496	13.9747	20.4745	18.1995
648	10.0747	20.1495	15.5996	12.9997	16.5746	19.4995	14.9496	13.9747	20.7995	17.8746
649	9.74976	20.1495	16.2496	12.6747	16.8996	18.8495	15.2746	13.6497	20.7995	17.8746
650	10.0747	20.4745	15.2746	12.0247	16.5746	18.8495	14.9496	12.9997	20.1495	17.8746
651	10.0747	20.1495	15.9246	13.3247	16.5746	18.8495	14.9496	13.6497	20.4745	18.1995
652	10.0747	20.4745	16.2496	12.6747	16.5746	19.1745	14.9496	13.6497	20.4745	18.5245
653	9.74976	20.1495	15.9246	12.6747	16.8996	18.8495	14.6246	13.6497	20.4745	18.1995
654	9.74976	20.4745	15.9246	12.6747	16.5746	18.8495	14.6246	12.6747	20.4745	17.8746
655	9.74976	20.4745	15.5996	12.6747	16.8996	18.8495	15.2746	12.6747	20.4745	18.1995
656	10.0747	20.1495	16.2496	12.9997	16.5746	18.8495	14.6246	12.9997	20.4745	17.8746
657	9.74976	19.8245	15.9246	12.6747	16.5746	19.1745	14.6246	12.6747	20.7995	18.1995
658	10.0747	20.4745	15.9246	12.6747	16.8996	19.1745	14.9496	12.3497	20.7995	17.8746
659	10.0747	20.4745	15.9246	12.6747	16.5746	19.1745	14.9496	12.9997	20.4745	17.5496
660	10.0747	20.4745	15.2746	12.9997	16.5746	18.8495	14.9496	13.3247	21.1245	18.1995
661	10.0747	20.1495	15.5996	12.9997	16.8996	19.1745	14.6246	12.6747	20.4745	18.1995
662	9.74976	20.4745	15.5996	12.3497	16.8996	19.1745	14.6246	12.6747	20.4745	17.5496
663	9.74976	20.4745	16.2496	12.9997	16.8996	18.8495	14.9496	12.9997	19.8245	18.1995
664	10.0747	20.1495	15.5996	12.9997	16.8996	18.8495	14.9496	12.6747	20.7995	17.8746
665	10.0747	20.1495	15.2746	12.9997	16.8996	18.8495	14.6246	12.9997	20.7995	17.5496
666	10.0747	19.8245	15.9246	12.9997	16.8996	18.8495	14.9496	13.6497	20.4745	18.5245
667	10.3997	20.4745	15.9246	12.6747	16.5746	19.1745	14.9496	13.3247	20.4745	18.5245
668	9.74976	20.1495	16.5746	12.9997	16.8996	18.5245	14.9496	13.6497	20.1495	18.8495
669	10.0747	20.1495	15.9246	12.6747	16.8996	18.8495	14.9496	13.6497	20.7995	17.5496
670	9.74976	20.4745	15.9246	12.9997	16.8996	18.8495	14.6246	13.6497	20.1495	17.5496
671	10.0747	20.4745	15.5996	12.6747	16.5746	18.8495	14.6246	13.6497	20.4745	17.5496
672	9.74976	20.1495	16.2496	12.9997	16.8996	19.1745	14.9496	13.6497	20.4745	18.8495
673	10.0747	20.1495	16.5746	12.6747	16.8996	19.1745	14.9496	13.9747	20.4745	17.5496
674	10.0747	20.4745	15.9246	12.6747	16.5746	19.1745	15.2746	13.3247	20.1495	16.8996
675	10.0747	20.4745	15.9246	12.9997	16.8996	19.1745	14.6246	13.3247	20.1495	16.8996
676	10.0747	20.4745	16.5746	12.9997	16.8996	18.8495	14.9496	13.3247	20.1495	18.1995
677	10.0747	20.4745	15.9246	12.6747	16.8996	18.5245	14.6246	12.9997	20.4745	17.8746
678	10.0747	20.4745	16.2496	12.9997	16.8996	18.8495	14.9496	13.6497	20.7995	17.8746
679	9.74976	20.4745	15.5996	12.6747	16.5746	18.8495	14.6246	13.6497	20.7995	18.1995
680	10.0747	20.4745	15.9246	12.9997	16.8996	19.1745	14.6246	12.9997	20.1495	18.1995
681	10.0747	20.4745	15.5996	12.6747	16.8996	18.8495	14.9496	13.3247	20.1495	18.1995
682	9.74976	20.4745	16.5746	12.9997	16.8996	19.1745	14.6246	13.3247	20.1495	17.5496
683	9.74976	20.4745	16.2496	12.9997	16.8996	18.8495	14.6246	12.9997	20.7995	18.1995
684	10.0747	20.4745	15.5996	12.6747	16.5746	18.8495	14.6246	12.9997	19.8245	18.5245
685	10.0747	20.4745	15.5996	12.9997	16.5746	19.1745	14.9496	12.9997	19.8245	17.5496
686	9.74976	20.4745	15.5996	12.6747	16.8996	19.1745	14.9496	12.9997	20.1495	17.8746
687	9.74976	20.4745	15.5996	12.6747	16.8996	19.1745	14.9496	12.9997	20.4745	17.8746
688	10.0747	20.4745	15.9246	12.6747	16.5746	18.8495	14.9496	12.9997	20.1495	17.8746
689	9.74976	20.4745	15.2746	12.6747	16.5746	18.8495	14.9496	13.6497	20.4745	17.5496
690	10.0747	20.4745	15.9246	12.9997	16.8996	18.8495	14.9496	13.6497	20.4745	18.1995
691	10.0747	20.4745	15.9246	12.9997	16.5746	18.8495	15.2746	13.6497	20.4745	17.5496
692	10.0747	20.4745	16.2496	12.3497	16.8996	18.8495	14.2996	13.6497	20.7995	17.8746
693	10.3997	20.1495	16.2496	12.6747	16.8996	18.8495	14.9496	13.6497	20.1495	17.8746
694	9.74976	20.1495	15.5996	12.6747	16.8996	18.8495	15.2746	13.9747	20.1495	17.5496
695	10.3997	20.4745	15.5996	12.9997	16.5746	18.8495	14.6246	13.6497	20.1495	17.8746
696	10.0747	20.1495	15.2746	12.9997	16.5746	18.8495	14.9496	12.6747	20.1495	18.1995
697	9.74976	20.4745	15.9246	13.3247	16.8996	18.8495	14.6246	13.3247	20.1495	17.2246
698	9.74976	20.4745	15.2746	12.6747	16.8996	18.8495	15.2746	12.9997	20.4745	17.5496
699	9.74976	20.4745	15.9246	12.9997	16.5746	19.1745	14.9496	13.6497	20.4745	17.8746
700	10.0747	20.4745	15.2746	12.9997	16.2496	19.1745	14.6246	13.6497	20.1495	18.1995
701	10.0747	20.1495	16.2496	12.9997	16.5746	18.8495	14.9496	14.2996	19.4995	17.8746
702	10.0747	19.8245	15.2746	12.6747	16.8996	18.5245	15.2746	14.2996	19.8245	17.8746
703	9.74976	20.4745	15.9246	12.3497	16.5746	18.8495	14.9496	13.9747	20.1495	18.1995
704	10.3997	20.1495	16.5746	13.3247	16.8996	19.1745	14.6246	13.9747	19.8245	17.8746
705	10.3997	20.1495	16.5746	12.9997	16.5746	18.8495	14.6246	13.6497	19.8245	17.8746
706	10.3997	20.1495	15.9246	12.6747	16.8996	18.5245	14.6246	13.6497	20.1495	18.1995
707	10.0747	20.4745	15.9246	12.6747	16.5746	19.1745	14.9496	13.6497	19.4995	18.1995
708	10.0747	20.4745	15.2746	12.6747	16.5746	18.8495	14.6246	14.2996	20.4745	17.2246
709	10.0747	20.1495	15.5996	12.9997	16.5746	19.1745	14.9496	13.6497	20.1495	17.8746
710	10.0747	20.4745	15.5996	12.9997	16.5746	19.4995	14.9496	13.6497	19.8245	17.8746
711	10.0747	20.1495	16.2496	12.9997	16.2496	19.4995	14.9496	13.3247	19.8245	18.1995
712	9.74976	20.4745	15.5996	12.9997	16.2496	18.8495	14.9496	13.9747	20.1495	17.8746
713	10.0747	20.1495	15.9246	12.9997	16.8996	19.1745	15.2746	13.6497	19.4995	16.8996
714	9.74976	20.4745	15.9246	12.6747	16.5746	19.1745	14.9496	13.6497	20.4745	18.1995
715	9.74976	20.4745	15.2746	12.9997	16.2496	18.8495	14.9496	13.9747	20.4745	17.8746
716	9.74976	20.1495	15.9246	12.6747	16.2496	19.1745	14.9496	13.6497	20.7995	18.1995
717	10.3997	20.4745	15.9246	12.9997	16.5746	19.1745	14.9496	13.6497	20.4745	17.8746
718	10.0747	20.4745	15.9246	12.9997	16.5746	18.8495	14.6246	14.6246	19.8245	18.5245
719	10.0747	20.1495	15.9246	12.9997	16.5746	19.1745	14.6246	13.9747	20.4745	17.8746
720	10.0747	20.1495	15.5996	12.0247	16.5746	19.1745	14.9496	13.9747	20.4745	18.1995
721	9.74976	20.4745	15.9246	12.6747	16.5746	19.1745	15.2746	14.2996	19.8245	17.5496
722	10.3997	20.4745	16.2496	12.9997	16.5746	18.8495	15.2746	13.9747	20.1495	17.8746
723	10.0747	20.4745	15.9246	12.3497	16.5746	18.8495	15.2746	13.9747	20.1495	17.8746
724	10.0747	20.4745	14.9496	12.0247	16.5746	19.4995	15.2746	14.2996	19.4995	17.8746
725	9.74976	20.1495	15.2746	12.6747	16.5746	18.8495	14.9496	13.9747	19.4995	17.8746
726	10.0747	20.4745	15.5996	12.6747	16.5746	19.1745	15.2746	14.2996	20.4745	17.8746
727	10.0747	20.4745	15.9246	12.9997	16.5746	19.4995	14.6246	13.9747	19.8245	17.8746
728	10.0747	20.1495	15.2746	12.9997	16.2496	19.1745	14.9496	13.9747	20.1495	17.8746
729	10.3997	20.4745	15.2746	12.9997	16.5746	19.4995	15.2746	13.9747	20.4745	18.1995
730	10.3997	20.1495	15.5996	12.3497	16.5746	19.4995	14.6246	13.9747	20.1495	18.1995
731	9.74976	20.4745	15.5996	12.6747	16.2496	19.1745	14.9496	14.2996	20.1495	18.1995
732	10.0747	20.4745	15.9246	12.9997	16.5746	19.1745	14.9496	14.2996	19.1745	17.5496
733	9.74976	20.1495	15.9246	12.9997	16.5746	19.4995	14.6246	14.6246	19.8245	17.8746
734	10.0747	20.1495	15.2746	12.6747	16.8996	18.8495	14.6246	14.2996	20.1495	17.8746
735	10.0747	20.4745	15.9246	12.6747	16.5746	19.4995	15.2746	14.2996	20.1495	17.8746
736	9.74976	20.4745	16.2496	12.6747	16.8996	19.1745	14.9496	13.6497	19.4995	18.1995
737	9.74976	20.4745	16.2496	12.6747	16.5746	19.4995	14.9496	13.6497	19.8245	17.8746
738	9.42476	20.1495	15.5996	13.3247	16.2496	19.1745	14.9496	14.2996	19.8245	18.5245
739	10.0747	20.1495	15.5996	13.3247	16.5746	18.8495	14.9496	13.9747	19.8245	18.1995
740	10.0747	20.1495	15.5996	12.9997	16.5746	19.1745	15.2746	13.9747	19.8245	18.1995
741	10.0747	20.1495	15.9246	13.3247	16.5746	18.8495	15.2746	14.2996	20.4745	18.8495
742	10.0747	20.1495	15.5996	12.9997	16.8996	18.8495	15.2746	13.9747	19.8245	17.5496
743	10.3997	20.4745	15.5996	12.9997	16.8996	18.8495	14.6246	14.2996	19.8245	17.8746
744	10.0747	20.1495	15.9246	12.9997	16.8996	18.8495	15.2746	12.9997	19.8245	18.1995
745	10.0747	19.8245	15.5996	12.6747	16.5746	18.8495	15.2746	12.9997	19.8245	18.1995
746	10.0747	20.4745	15.9246	12.3497	16.5746	18.8495	15.2746	13.3247	20.4745	18.5245
747	10.0747	20.1495	15.9246	12.3497	16.2496	18.8495	15.2746	13.3247	19.8245	18.1995
748	10.0747	20.1495	15.2746	12.3497	16.5746	18.5245	15.2746	13.3247	19.4995	18.1995
749	10.0747	20.1495	15.5996	12.6747	16.5746	18.8495	14.2996	13.6497	19.4995	18.1995
750	10.0747	20.1495	15.9246	13.3247	16.5746	18.8495	14.9496	13.9747	20.4745	17.5496
751	10.0747	20.4745	15.2746	12.9997	16.5746	18.8495	14.9496	13.9747	20.4745	17.8746
752	10.0747	20.1495	15.9246	12.9997	16.2496	18.8495	14.9496	13.9747	20.7995	18.5245
753	10.0747	20.4745	15.5996	12.9997	16.5746	18.8495	14.9496	13.9747	19.8245	18.5245
754	9.74976	20.1495	14.9496	12.6747	16.5746	18.8495	15.2746	14.2996	19.4995	18.1995
755	10.0747	20.1495	15.2746	12.9997	16.5746	18.8495	14.6246	14.2996	19.4995	17.8746
756	10.0747	20.1495	15.9246	12.6747	16.5746	18.8495	14.9496	13.9747	20.4745	17.8746
757	10.0747	20.1495	15.5996	12.9997	16.5746	18.8495	14.9496	14.2996	19.8245	17.5496
758	10.0747	20.1495	15.9246	12.9997	16.5746	18.5245	14.6246	13.9747	20.1495	18.1995
759	10.0747	20.1495	15.9246	13.3247	16.5746	19.1745	15.2746	13.6497	19.8245	18.1995
760	10.0747	20.1495	15.5996	12.9997	16.5746	18.5245	14.9496	14.2996	19.4995	17.8746
761	10.0747	20.4745	15.2746	12.9997	16.8996	18.5245	14.2996	14.2996	20.4745	17.2246
762	10.0747	20.1495	15.2746	13.3247	16.5746	18.8495	15.2746	13.9747	19.4995	17.5496
763	10.0747	20.4745	15.2746	12.6747	16.5746	18.5245	14.6246	14.2996	19.4995	17.8746
764	9.74976	20.1495	16.2496	12.9997	16.8996	18.5245	14.9496	14.6246	20.1495	18.1995
765	10.0747	20.1495	15.9246	12.9997	16.8996	18.5245	14.9496	13.9747	20.4745	17.8746
766	10.0747	20.4745	16.5746	12.6747	16.5746	18.8495	15.2746	14.6246	20.1495	17.2246
767	10.0747	20.1495	16.2496	12.9997	16.5746	18.5245	14.9496	14.2996	19.8245	18.5245
768	9.74976	20.4745	16.2496	12.9997	16.8996	18.8495	14.6246	14.2996	19.8245	17.8746
769	10.0747	20.1495	16.2496	12.9997	16.8996	18.8495	15.2746	14.2996	19.1745	18.1995
770	10.0747	20.1495	14.6246	12.9997	16.8996	18.5245	14.2996	13.9747	19.8245	17.5496
771	10.0747	20.4745	16.8996	12.9997	16.5746	18.8495	14.9496	13.9747	20.4745	18.1995
772	10.0747	20.4745	16.8996	13.3247	16.5746	18.5245	14.9496	14.2996	20.4745	18.5245
773	10.0747	20.4745	16.2496	12.9997	16.5746	18.8495	15.2746	14.2996	20.4745	17.8746
774	9.74976	20.1495	17.5496	12.9997	16.5746	19.1745	15.2746	13.9747	19.8245	18.1995
775	10.0747	20.1495	15.2746	13.3247	16.5746	18.5245	15.2746	13.9747	20.1495	18.1995
776	10.0747	20.1495	15.2746	13.3247	16.8996	18.8495	15.2746	13.9747	19.8245	17.5496
777	10.0747	20.4745	15.9246	13.3247	16.8996	18.8495	15.5996	13.9747	19.8245	17.8746
778	10.0747	20.4745	16.2496	12.9997	16.8996	18.8495	15.5996	14.2996	19.4995	17.8746
779	10.0747	20.1495	16.8996	13.3247	16.5746	18.5245	15.2746	13.9747	19.8245	17.8746
780	10.0747	20.1495	16.2496	12.9997	16.2496	18.8495	15.2746	13.9747	19.8245	17.8746
781	10.0747	20.1495	17.2246	13.3247	16.2496	18.8495	14.9496	13.9747	19.4995	18.1995
782	10.0747	20.1495	17.5496	13.3247	15.9246	19.1745	15.2746	13.9747	20.1495	17.8746
783	9.74976	20.1495	16.2496	12.9997	16.2496	19.1745	15.2746	13.9747	19.8245	18.1995
784	10.0747	20.1495	16.5746	13.6497	16.5746	19.1745	15.2746	14.2996	20.1495	17.8746
785	10.0747	20.1495	17.2246	12.9997	17.2246	18.8495	14.9496	13.9747	19.4995	18.1995
786	10.0747	20.1495	15.9246	12.9997	17.8746	18.8495	15.2746	13.6497	20.4745	17.8746
787	10.0747	20.1495	15.5996	13.3247	17.5496	18.8495	15.2746	13.9747	19.4995	18.5245
788	10.0747	20.4745	15.5996	13.6497	17.8746	18.8495	14.9496	13.9747	20.1495	18.5245
789	10.0747	20.1495	16.2496	13.3247	17.5496	18.5245	15.5996	13.9747	20.4745	17.5496
790	10.0747	20.1495	15.9246	12.9997	17.8746	18.8495	14.6246	13.9747	20.4745	18.1995
791	10.0747	20.1495	16.2496	12.9997	17.2246	18.5245	15.2746	14.2996	20.1495	17.5496
792	10.0747	20.1495	15.5996	12.0247	17.2246	18.8495	14.6246	14.2996	19.8245	17.8746
793	9.74976	20.1495	14.9496	12.9997	17.5496	19.1745	14.9496	14.2996	20.4745	18.1995
794	9.74976	20.1495	15.9246	12.3497	17.8746	18.5245	14.9496	14.2996	19.8245	17.5496
795	10.0747	20.4745	15.9246	12.9997	17.5496	18.8495	15.2746	13.6497	19.4995	18.1995
796	10.0747	20.4745	16.2496	12.9997	17.2246	19.1745	15.2746	14.2996	20.1495	17.8746
797	10.0747	20.1495	15.5996	12.9997	17.2246	18.5245	14.9496	14.6246	19.8245	18.1995
798	10.0747	20.1495	16.2496	12.6747	17.5496	18.5245	15.2746	13.9747	20.7995	18.5245
799	9.74976	20.1495	15.5996	12.9997	17.5496	18.8495	15.2746	14.6246	19.8245	17.8746
800	10.0747	20.1495	16.2496	12.3497	17.5496	18.8495	15.2746	14.9496	20.4745	18.5245
801	9.74976	20.1495	15.9246	12.6747	17.5496	18.8495	14.9496	14.6246	19.8245	18.1995
802	9.74976	20.1495	16.8996	12.3497	17.5496	18.8495	14.6246	14.6246	20.1495	18.1995
803	9.74976	20.4745	16.2496	12.9997	17.5496	18.5245	14.9496	14.2996	20.1495	18.1995
804	10.0747	20.1495	16.5746	12.3497	17.2246	18.5245	14.9496	13.9747	19.8245	18.5245
805	10.0747	20.1495	16.5746	12.9997	17.5496	18.5245	15.2746	14.6246	19.4995	17.8746
806	9.74976	20.4745	15.9246	12.6747	17.5496	18.8495	15.2746	14.6246	19.8245	18.8495
807	9.74976	20.4745	16.2496	12.9997	17.2246	18.8495	14.9496	14.6246	19.8245	18.8495
808	9.74976	20.4745	16.5746	12.6747	17.5496	18.8495	14.9496	13.9747	21.1245	18.8495
809	10.0747	20.1495	16.8996	12.6747	17.5496	18.1995	15.2746	14.6246	20.1495	17.5496
810	9.74976	20.1495	14.9496	12.9997	17.5496	18.1995	15.2746	14.6246	19.8245	18.1995
811	10.0747	20.1495	16.2496	12.9997	17.5496	18.5245	15.2746	14.9496	20.1495	18.5245
812	10.0747	20.4745	16.8996	13.3247	17.5496	18.5245	15.2746	14.2996	20.1495	18.1995
813	9.74976	20.1495	16.2496	12.9997	17.5496	18.1995	14.9496	14.2996	19.8245	17.8746
814	10.0747	20.1495	16.8996	13.3247	17.5496	18.5245	14.6246	14.6246	19.4995	18.5245
815	9.74976	20.1495	17.5496	12.9997	17.2246	18.5245	15.2746	13.9747	20.4745	18.1995
816	10.0747	20.4745	16.2496	12.9997	17.5496	18.1995	15.5996	13.6497	20.4745	17.8746
817	10.0747	20.1495	16.2496	12.9997	17.5496	18.5245	15.5996	13.3247	19.8245	18.1995
818	9.74976	20.4745	16.2496	13.6497	17.5496	18.1995	14.9496	14.2996	20.1495	18.5245
819	10.0747	20.1495	15.9246	12.6747	17.2246	18.5245	15.2746	13.9747	19.8245	18.1995
820	10.0747	20.1495	16.5746	13.3247	17.5496	18.5245	14.9496	14.2996	20.1495	18.1995
821	10.0747	20.4745	16.5746	13.3247	17.5496	18.1995	15.2746	13.6497	20.1495	18.1995
822	9.74976	20.1495	16.8996	13.3247	17.5496	18.5245	14.6246	13.6497	19.4995	18.5245
823	10.0747	20.1495	16.8996	12.9997	17.2246	18.1995	14.9496	13.9747	20.1495	18.1995
824	9.74976	20.1495	15.9246	13.3247	17.2246	18.1995	14.9496	13.3247	20.4745	18.8495
825	10.0747	20.1495	16.2496	13.6497	17.2246	18.1995	15.2746	12.9997	19.8245	18.1995
826	9.74976	20.4745	16.5746	12.9997	17.5496	18.8495	15.5996	12.9997	20.1495	17.8746
827	10.0747	20.4745	16.2496	12.6747	17.2246	18.5245	14.9496	13.6497	19.4995	17.5496
828	10.0747	20.4745	16.2496	12.9997	17.5496	18.5245	14.9496	13.9747	20.4745	17.8746
829	9.74976	20.1495	16.5746	12.9997	17.2246	18.5245	14.9496	13.3247	19.1745	17.8746
830	9.74976	20.4745	16.2496	13.3247	17.2246	18.5245	14.9496	13.6497	19.4995	17.8746
831	9.74976	20.1495	15.9246	13.3247	17.5496	18.1995	14.9496	13.9747	19.8245	18.5245
832	9.74976	20.4745	16.5746	13.3247	17.5496	18.8495	15.2746	12.6747	20.1495	18.5245
833	10.0747	20.4745	16.8996	12.6747	17.5496	18.1995	15.2746	12.9997	19.8245	18.1995
834	10.0747	20.4745	16.2496	13.3247	17.5496	18.5245	15.2746	12.3497	19.8245	18.1995
835	10.0747	20.1495	16.2496	12.9997	17.5496	18.5245	15.2746	13.3247	20.1495	18.8495
836	9.74976	20.1495	16.2496	13.3247	17.2246	18.5245	15.5996	12.9997	19.1745	17.8746
837	9.74976	20.4745	15.9246	13.3247	17.8746	18.5245	14.9496	13.9747	19.8245	18.1995
838	9.74976	20.1495	16.2496	13.3247	17.2246	18.8495	15.2746	13.9747	20.1495	18.1995
839	9.74976	20.1495	16.8996	13.3247	17.5496	19.1745	14.9496	13.6497	19.8245	18.8495
840	9.74976	20.1495	15.9246	13.9747	17.2246	18.8495	14.9496	13.9747	19.4995	18.1995
841	10.0747	20.1495	16.8996	13.3247	17.5496	18.5245	15.2746	13.6497	19.4995	17.8746
842	10.0747	20.1495	15.9246	13.3247	17.2246	18.8495	15.2746	13.9747	19.4995	18.5245
843	10.0747	20.4745	16.2496	13.3247	17.5496	18.1995	15.5996	14.2996	19.1745	18.5245
844	9.74976	20.4745	17.2246	13.3247	17.2246	18.5245	14.9496	14.6246	20.7995	18.1995
845	9.74976	20.4745	15.9246	12.9997	17.5496	18.1995	14.9496	13.9747	20.4745	18.5245
846	9.74976	20.1495	16.2496	12.9997	17.5496	18.8495	15.5996	14.2996	20.4745	18.1995
847	9.74976	20.1495	15.5996	13.6497	17.5496	18.1995	14.9496	14.2996	21.1245	18.1995
848	10.0747	20.4745	16.5746	13.3247	17.5496	18.1995	15.2746	14.2996	21.1245	18.5245
849	10.0747	20.1495	16.5746	12.9997	17.5496	18.5245	14.9496	13.6497	21.1245	18.1995
850	10.0747	20.4745	16.8996	13.6497	17.2246	18.1995	15.2746	13.9747	20.7995	17.5496
851	10.0747	20.1495	16.5746	13.9747	17.5496	18.5245	15.2746	14.2996	20.7995	18.1995
852	10.0747	20.4745	16.5746	13.3247	17.5496	18.8495	15.2746	14.6246	21.4495	17.5496
853	9.74976	20.4745	16.5746	12.9997	17.5496	18.1995	15.2746	14.2996	21.4495	18.1995
854	10.0747	20.4745	16.8996	12.9997	17.5496	18.5245	14.9496	14.2996	19.8245	18.1995
855	9.74976	20.1495	16.2496	12.9997	17.5496	18.5245	14.6246	13.6497	19.4995	17.8746
856	10.0747	20.4745	15.5996	13.3247	17.5496	18.8495	15.5996	14.2996	19.1745	18.1995
857	9.74976	20.1495	16.5746	13.3247	17.5496	18.8495	15.2746	13.9747	19.1745	17.8746
858	10.0747	20.1495	16.2496	13.6497	17.5496	18.1995	14.9496	14.2996	19.4995	17.8746
859	10.0747	20.4745	16.5746	13.6497	17.5496	18.1995	14.9496	13.9747	19.4995	17.5496
860	10.0747	20.4745	16.2496	12.9997	17.5496	18.8495	14.6246	14.2996	19.4995	17.5496
861	9.74976	20.4745	16.2496	13.3247	17.2246	18.1995	15.2746	14.2996	19.8245	17.5496
862	9.74976	20.1495	15.9246	13.3247	17.5496	18.5245	14.9496	14.9496	19.8245	17.8746
863	10.0747	20.1495	16.8996	13.6497	17.2246	18.5245	14.9496	13.6497	19.8245	17.8746
864	9.74976	20.4745	15.9246	13.3247	17.5496	18.5245	14.9496	14.2996	20.7995	17.8746
865	9.74976	20.4745	16.2496	12.9997	17.2246	18.8495	15.2746	14.2996	20.4745	18.1995
866	9.74976	20.4745	16.5746	12.6747	17.5496	18.8495	15.5996	14.2996	19.8245	17.2246
867	9.74976	20.1495	16.5746	12.9997	17.5496	18.1995	15.2746	13.9747	19.4995	17.8746
868	9.74976	20.1495	16.8996	12.9997	17.2246	18.8495	15.2746	14.2996	20.1495	18.5245
869	9.74976	20.4745	16.2496	12.6747	17.5496	18.5245	15.2746	14.2996	19.8245	18.1995
870	9.74976	20.4745	16.8996	13.3247	17.5496	18.5245	15.2746	14.6246	20.1495	17.8746
871	10.0747	20.4745	16.2496	12.9997	17.5496	18.8495	14.6246	13.9747	20.1495	18.1995
872	10.0747	20.1495	16.2496	13.3247	17.8746	18.5245	15.2746	14.9496	20.4745	17.2246
873	9.42476	20.4745	16.2496	12.9997	17.5496	18.8495	15.2746	14.2996	19.8245	17.8746
874	9.74976	20.4745	15.9246	13.3247	17.2246	18.5245	15.2746	13.9747	20.1495	18.5245
875	9.74976	20.4745	16.2496	13.3247	17.5496	18.5245	15.2746	14.2996	19.8245	17.8746
876	9.74976	20.4745	16.5746	12.9997	17.5496	18.8495	15.2746	14.2996	20.1495	18.5245
877	9.74976	20.4745	16.2496	12.6747	17.5496	18.8495	14.9496	14.2996	19.8245	18.1995
878	9.74976	20.4745	16.8996	13.3247	17.5496	18.8495	15.2746	14.2996	20.1495	18.1995
879	9.74976	20.4745	16.2496	13.3247	17.5496	18.8495	15.2746	13.9747	19.8245	17.8746
880	9.74976	20.4745	16.5746	12.6747	17.5496	18.8495	14.9496	14.2996	19.8245	17.8746
881	9.74976	20.1495	17.2246	12.9997	17.5496	18.5245	14.6246	14.2996	19.4995	18.5245
882	10.0747	20.4745	17.5496	12.9997	17.5496	18.5245	14.9496	14.6246	20.1495	18.1995
883	10.3997	20.4745	15.9246	13.3247	17.5496	19.1745	15.2746	13.9747	19.1745	18.8495
884	9.74976	20.4745	16.2496	12.6747	17.5496	18.8495	15.2746	14.2996	19.4995	18.1995
885	9.74976	20.4745	16.2496	13.3247	17.5496	19.1745	15.2746	13.9747	19.4995	17.8746
886	9.74976	20.4745	17.2246	13.3247	17.5496	18.8495	15.2746	14.2996	19.8245	17.5496
887	10.0747	20.1495	16.2496	12.9997	17.5496	18.5245	14.6246	13.9747	19.8245	18.1995
888	9.74976	20.4745	16.2496	13.3247	17.5496	18.5245	15.5996	14.2996	20.1495	17.8746
889	9.74976	20.4745	15.2746	12.9997	17.5496	17.8746	15.2746	14.9496	19.8245	18.5245
890	9.74976	20.4745	16.5746	12.9997	17.2246	18.1995	15.2746	15.2746	20.7995	18.1995
891	9.74976	20.4745	15.5996	12.9997	17.5496	17.8746	14.6246	14.6246	19.8245	18.5245
892	9.74976	20.4745	15.9246	12.9997	17.5496	18.1995	14.9496	14.9496	19.8245	17.5496
893	9.74976	20.4745	15.9246	12.9997	17.2246	19.1745	14.9496	13.6497	20.1495	18.1995
894	9.74976	20.4745	16.5746	12.9997	17.5496	18.1995	14.9496	15.2746	20.1495	18.5245
895	9.74976	20.4745	15.2746	13.3247	17.5496	18.1995	15.5996	14.2996	19.1745	17.8746
896	9.74976	20.4745	15.9246	13.6497	17.5496	18.5245	14.6246	14.6246	19.4995	18.8495
897	9.74976	20.4745	15.9246	13.6497	17.5496	18.5245	15.2746	14.2996	19.4995	18.1995
898	10.0747	20.4745	16.2496	13.6497	17.5496	18.5245	14.9496	13.9747	19.4995	18.1995
899	9.74976	20.4745	15.9246	12.6747	17.5496	18.8495	14.6246	13.6497	19.4995	18.1995
900	10.0747	20.4745	15.9246	13.3247	17.5496	18.1995	14.9496	13.3247	19.4995	18.1995
901	9.74976	20.4745	16.2496	12.9997	17.5496	18.5245	14.6246	13.9747	19.4995	18.1995
902	10.0747	20.4745	16.8996	12.0247	17.5496	18.8495	14.9496	13.9747	19.1745	18.8495
903	10.3997	20.7995	16.2496	12.9997	17.5496	18.5245	15.2746	13.3247	19.1745	17.5496
904	9.74976	20.4745	15.9246	12.9997	17.5496	18.5245	14.9496	13.6497	19.1745	18.5245
905	9.74976	20.4745	16.5746	12.3497	17.5496	18.1995	14.9496	13.6497	19.4995	18.1995
906	9.74976	20.4745	16.2496	12.9997	17.5496	18.5245	15.2746	14.2996	20.1495	18.1995
907	9.74976	20.4745	16.5746	12.9997	17.8746	18.5245	14.9496	13.6497	19.4995	18.1995
908	10.0747	20.4745	16.5746	13.3247	17.8746	18.8495	15.2746	13.3247	19.4995	18.1995
909	9.74976	20.4745	15.9246	12.9997	17.5496	18.5245	14.6246	13.3247	19.1745	17.8746
910	10.0747	20.4745	15.9246	12.9997	17.5496	18.5245	15.2746	12.9997	19.4995	18.1995
911	10.0747	20.4745	16.8996	12.9997	17.8746	18.5245	14.9496	13.3247	19.1745	17.8746
912	9.74976	20.4745	16.2496	13.3247	17.8746	18.8495	14.9496	13.3247	19.4995	18.1995
913	9.74976	20.4745	15.5996	12.6747	18.1995	18.8495	15.2746	13.3247	19.1745	17.8746
914	10.0747	20.4745	16.5746	12.9997	17.8746	18.5245	14.9496	13.6497	19.1745	17.5496
915	10.0747	20.4745	16.2496	12.9997	17.8746	18.5245	14.9496	13.3247	19.1745	17.8746
916	9.74976	20.4745	16.5746	13.6497	17.5496	18.8495	14.9496	13.3247	20.1495	18.1995
917	9.74976	20.4745	16.2496	12.9997	17.8746	18.8495	14.9496	13.6497	19.1745	18.5245
918	9.74976	20.4745	16.2496	12.6747	17.5496	18.5245	14.9496	13.3247	19.4995	17.8746
919	9.74976	20.4745	16.5746	13.3247	17.5496	18.8495	14.9496	13.3247	19.4995	17.8746
920	9.74976	20.4745	15.5996	12.0247	17.5496	18.5245	14.9496	13.6497	20.1495	18.5245
921	10.0747	20.4745	16.5746	13.3247	17.5496	18.5245	14.9496	13.6497	19.4995	17.8746
922	9.74976	20.4745	16.2496	13.3247	17.5496	18.5245	14.9496	13.6497	19.4995	18.5245
923	10.0747	20.4745	15.9246	12.6747	17.5496	18.8495	14.9496	13.6497	19.1745	18.1995
924	10.0747	20.4745	16.2496	12.9997	17.5496	18.1995	15.2746	13.6497	19.8245	17.8746
925	10.0747	20.4745	16.8996	13.3247	17.5496	18.5245	15.2746	13.6497	19.4995	17.8746
926	9.74976	20.4745	15.9246	12.6747	17.5496	18.5245	14.9496	13.9747	20.1495	17.2246
927	10.0747	20.4745	15.9246	12.9997	17.8746	18.5245	14.9496	14.2996	19.8245	18.5245
928	9.74976	20.4745	16.5746	13.3247	17.5496	18.5245	14.9496	13.9747	19.4995	17.8746
929	9.74976	20.4745	16.5746	13.3247	17.5496	18.8495	15.2746	13.6497	19.1745	17.5496
930	10.0747	20.4745	16.5746	13.3247	17.5496	18.8495	15.2746	13.6497	19.8245	18.5245
931	10.0747	20.1495	16.2496	12.9997	17.5496	18.8495	14.9496	13.9747	19.8245	17.8746
932	9.74976	20.1495	15.9246	12.9997	17.5496	19.1745	14.9496	13.9747	19.4995	18.1995
933	10.0747	20.1495	15.9246	13.3247	17.5496	19.1745	14.6246	13.9747	19.4995	17.5496
934	9.42476	20.4745	16.5746	13.3247	17.5496	18.1995	14.9496	13.9747	19.8245	18.1995
935	10.0747	20.4745	16.2496	13.3247	17.8746	18.5245	15.2746	13.6497	19.4995	18.1995
936	10.0747	20.1495	15.9246	13.3247	17.8746	18.8495	15.2746	14.2996	19.4995	17.8746
937	10.0747	20.4745	16.2496	13.3247	17.5496	19.1745	15.2746	14.2996	19.8245	18.5245
938	9.74976	20.4745	16.2496	12.9997	17.5496	19.1745	15.2746	13.9747	20.4745	18.1995
939	9.74976	20.4745	16.5746	12.9997	17.8746	18.8495	14.6246	13.9747	20.4745	18.1995
940	9.74976	20.4745	15.9246	12.9997	17.8746	18.8495	15.2746	14.2996	20.1495	18.1995
941	10.0747	20.4745	16.2496	12.9997	17.5496	19.1745	15.2746	13.9747	20.1495	17.8746
942	10.0747	20.4745	16.5746	12.9997	17.8746	19.1745	15.2746	13.9747	20.1495	18.1995
943	10.0747	20.4745	16.2496	12.9997	17.5496	18.8495	14.6246	14.2996	20.4745	18.1995
944	10.0747	20.4745	16.5746	13.3247	17.8746	19.1745	15.5996	14.2996	20.4745	18.1995
945	9.74976	20.4745	15.9246	12.9997	17.5496	19.1745	14.9496	13.9747	20.4745	18.1995
946	10.0747	20.4745	16.2496	13.3247	17.5496	19.1745	14.9496	13.9747	20.1495	17.8746
947	9.74976	20.4745	15.9246	13.3247	17.5496	19.1745	15.5996	13.9747	20.1495	18.5245
948	10.0747	20.4745	16.8996	13.3247	17.5496	19.1745	14.9496	13.9747	19.4995	18.5245
949	10.0747	20.4745	16.2496	12.9997	17.5496	18.8495	14.9496	13.9747	19.4995	18.5245
950	9.74976	20.4745	16.2496	13.3247	17.5496	19.4995	15.2746	14.2996	19.8245	18.8495
951	9.74976	20.4745	16.8996	12.6747	17.5496	18.5245	15.5996	13.9747	19.8245	18.5245
952	9.74976	20.4745	16.2496	12.6747	17.5496	18.5245	15.5996	14.2996	19.4995	17.8746
953	9.74976	20.1495	16.5746	13.3247	17.5496	17.8746	15.2746	13.9747	19.4995	18.5245
954	10.0747	20.1495	16.2496	12.9997	17.5496	18.1995	14.9496	14.2996	20.4745	18.1995
955	10.0747	20.1495	16.2496	13.3247	17.8746	17.8746	15.5996	14.6246	20.1495	16.8996
956	10.0747	20.4745	16.5746	13.3247	17.5496	18.5245	14.6246	14.2996	20.1495	18.5245
957	10.0747	20.4745	16.8996	12.9997	17.5496	18.8495	14.9496	13.6497	19.8245	17.8746
958	10.0747	20.4745	16.2496	12.9997	17.5496	18.8495	15.2746	14.2996	19.8245	17.8746
959	9.74976	20.4745	16.2496	12.9997	17.5496	19.1745	15.2746	13.6497	20.4745	17.8746
960	9.74976	20.4745	17.2246	13.3247	17.5496	18.8495	15.2746	13.9747	19.4995	18.5245
961	10.0747	20.4745	16.5746	13.3247	17.2246	18.5245	15.5996	13.9747	19.4995	17.8746
962	9.74976	20.1495	16.5746	13.3247	17.5496	18.8495	15.2746	13.9747	19.8245	17.8746
963	9.74976	20.1495	16.5746	12.6747	17.5496	18.8495	15.2746	13.9747	19.4995	17.8746
964	9.74976	20.4745	16.5746	12.9997	17.5496	18.5245	15.2746	14.2996	19.4995	17.8746
965	10.0747	20.4745	16.5746	12.9997	17.5496	18.5245	14.9496	13.6497	19.4995	18.1995
966	10.0747	20.4745	16.2496	12.9997	17.5496	19.1745	14.9496	13.6497	19.1745	18.5245
967	9.42476	20.4745	16.2496	12.9997	17.2246	18.1995	14.9496	14.2996	19.8245	18.1995
968	9.42476	20.4745	17.2246	12.6747	17.5496	19.1745	15.2746	13.9747	20.1495	17.8746
969	9.74976	20.4745	16.5746	12.9997	17.5496	18.5245	14.9496	13.9747	19.8245	18.1995
970	9.74976	20.1495	16.5746	12.6747	17.2246	18.8495	14.9496	13.9747	19.8245	18.5245
971	9.42476	20.4745	16.2496	12.9997	17.2246	18.8495	14.9496	13.9747	19.4995	18.5245
972	10.0747	20.1495	15.9246	13.3247	17.5496	18.8495	15.2746	14.2996	20.4745	17.8746
973	10.0747	20.1495	16.5746	12.6747	17.5496	19.1745	15.2746	14.2996	19.8245	17.5496
974	10.0747	20.1495	15.9246	12.6747	17.5496	18.5245	14.9496	14.2996	19.4995	17.8746
975	10.0747	20.4745	16.5746	13.6497	17.2246	18.8495	14.9496	14.6246	19.8245	17.8746
976	9.74976	20.4745	16.8996	12.9997	17.5496	18.5245	14.9496	13.6497	19.8245	17.8746
977	9.74976	20.1495	16.2496	12.6747	17.5496	19.1745	14.9496	13.9747	20.1495	18.5245
978	9.74976	20.4745	16.5746	13.3247	17.5496	18.5245	14.9496	14.2996	19.8245	18.1995
979	10.0747	20.4745	16.2496	12.9997	17.5496	18.8495	14.9496	13.9747	19.8245	18.8495
980	10.0747	20.4745	15.5996	13.3247	17.2246	18.5245	14.9496	14.2996	19.8245	18.1995
981	10.0747	20.4745	16.2496	13.3247	17.5496	18.5245	14.9496	13.9747	20.1495	18.1995
982	10.0747	20.1495	16.5746	13.3247	17.2246	18.5245	14.9496	13.9747	20.4745	17.8746
983	10.0747	20.4745	15.9246	12.9997	17.2246	18.5245	15.2746	14.9496	20.1495	18.5245
984	10.0747	20.4745	16.5746	12.9997	17.2246	18.1995	14.9496	14.2996	20.4745	18.1995
985	9.74976	20.4745	15.9246	12.9997	17.2246	18.8495	15.2746	13.9747	19.4995	18.8495
986	9.74976	20.4745	16.8996	12.9997	17.5496	19.4995	14.9496	14.2996	19.4995	17.8746
987	10.0747	20.1495	16.5746	12.9997	17.2246	18.5245	14.9496	14.2996	20.1495	18.5245
988	10.0747	20.4745	15.2746	13.3247	17.5496	19.1745	14.9496	13.6497	20.1495	19.1745
989	10.0747	20.4745	16.8996	12.9997	17.5496	18.5245	14.9496	13.9747	19.4995	18.8495
990	9.74976	20.4745	16.5746	12.9997	17.5496	18.8495	15.2746	13.9747	20.1495	18.1995
991	9.74976	20.1495	16.5746	12.9997	17.5496	19.1745	15.2746	13.3247	19.8245	18.1995
992	10.0747	20.1495	16.2496	12.9997	17.2246	18.8495	15.2746	13.9747	20.4745	18.8495
993	10.0747	20.1495	16.5746	13.3247	17.2246	19.4995	15.2746	13.6497	20.1495	18.5245
994	10.0747	20.1495	16.5746	12.9997	17.5496	19.1745	14.9496	13.3247	20.1495	18.5245
995	10.0747	20.1495	16.8996	12.9997	17.2246	18.8495	15.2746	13.3247	19.8245	18.5245
996	10.0747	20.4745	15.9246	12.9997	17.5496	18.8495	14.9496	13.6497	20.1495	18.1995
997	10.0747	20.4745	16.2496	12.6747	17.2246	18.5245	14.6246	13.6497	20.4745	18.1995
998	9.74976	20.4745	16.5746	12.6747	17.5496	18.8495	14.9496	14.2996	20.4745	17.8746
999	10.0747	20.4745	15.5996	12.9997	17.2246	19.1745	15.2746	13.9747	20.4745	18.1995
1000	9.74976	20.4745	16.5746	12.6747	17.5496	19.4995	14.9496	14.6246	20.4745	18.1995
1001	10.0747	20.1495	16.2496	12.6747	17.5496	18.5245	15.2746	14.6246	20.1495	18.1995
1002	10.0747	20.4745	15.9246	12.6747	17.2246	18.8495	15.2746	14.6246	20.1495	18.1995
1003	9.74976	20.1495	16.2496	12.6747	17.2246	19.1745	15.2746	14.6246	20.4745	18.1995
1004	10.0747	20.4745	16.5746	12.6747	17.2246	18.5245	14.9496	14.6246	20.7995	18.8495
1005	10.0747	20.4745	16.2496	12.9997	17.5496	18.8495	15.2746	14.9496	20.4745	18.1995
1006	10.0747	20.4745	15.5996	12.9997	16.8996	19.1745	14.9496	14.6246	20.1495	18.5245
1007	9.74976	20.4745	16.2496	12.9997	17.5496	18.8495	14.9496	14.6246	20.7995	18.1995
1008	9.74976	20.4745	16.2496	12.9997	17.5496	18.5245	14.9496	14.6246	20.4745	18.5245
1009	9.42476	20.4745	15.5996	12.9997	17.5496	18.8495	14.9496	14.9496	20.7995	18.5245
1010	9.74976	20.4745	16.5746	12.9997	17.5496	19.1745	14.9496	15.2746	20.1495	18.5245
1011	9.74976	20.7995	16.5746	13.3247	17.5496	18.1995	15.2746	14.9496	20.1495	18.1995
1012	10.0747	20.4745	16.2496	13.6497	17.5496	18.5245	14.9496	14.6246	20.4745	18.1995
1013	9.74976	20.4745	16.2496	13.3247	17.5496	19.1745	14.9496	14.6246	20.4745	18.1995
1014	10.0747	20.4745	16.5746	12.9997	17.5496	18.8495	15.2746	14.6246	20.1495	18.1995
1015	9.74976	20.4745	16.5746	13.3247	16.8996	19.1745	15.5996	13.9747	20.4745	18.1995
1016	9.42476	20.4745	16.2496	13.3247	17.2246	19.1745	15.2746	14.2996	20.1495	18.1995
1017	10.0747	20.4745	15.9246	12.9997	17.5496	19.4995	15.2746	14.6246	20.7995	17.8746
1018	9.42476	20.4745	15.9246	13.3247	17.2246	19.1745	15.2746	13.9747	20.7995	18.1995
1019	10.0747	20.4745	16.2496	13.3247	17.2246	19.1745	15.2746	13.9747	20.7995	18.5245
1020	9.74976	20.4745	15.9246	13.3247	17.2246	18.8495	14.9496	13.6497	20.4745	18.1995
1021	10.0747	20.4745	15.9246	13.3247	17.2246	19.1745	14.6246	13.9747	20.7995	18.1995
1022	9.42476	20.4745	17.2246	13.3247	17.2246	18.8495	14.2996	14.2996	20.4745	18.1995
1023	10.0747	20.4745	16.2496	12.9997	17.5496	18.8495	14.9496	14.6246	20.7995	18.1995
1024	9.74976	20.4745	16.2496	13.6497	17.2246	18.5245	15.5996	13.3247	20.4745	17.8746
1025	10.0747	20.4745	15.9246	13.3247	17.2246	19.1745	15.2746	13.6497	20.4745	18.5245
1026	10.0747	20.4745	16.5746	13.6497	17.2246	19.1745	15.2746	12.9997	20.1495	18.1995
1027	9.74976	20.4745	15.9246	12.9997	17.5496	19.8245	14.9496	12.9997	20.7995	17.5496
1028	9.74976	20.4745	15.5996	13.3247	17.5496	18.5245	14.9496	13.3247	20.7995	18.8495
1029	10.0747	20.4745	16.8996	13.3247	16.8996	19.1745	15.2746	12.6747	20.7995	17.5496
1030	10.0747	20.4745	15.9246	12.9997	17.5496	18.8495	14.9496	13.3247	20.7995	18.1995
1031	10.0747	20.4745	16.5746	13.3247	17.5496	18.8495	15.5996	12.9997	21.1245	18.1995
1032	10.0747	20.4745	16.2496	13.3247	17.5496	18.5245	15.2746	13.3247	20.7995	17.8746
1033	10.0747	20.4745	16.2496	13.6497	17.5496	18.8495	15.2746	13.3247	20.4745	18.1995
1034	10.0747	20.4745	16.2496	12.9997	17.5496	18.8495	15.2746	13.3247	20.7995	18.5245
1035	10.0747	20.4745	16.2496	13.3247	17.2246	18.5245	14.9496	13.3247	20.4745	17.5496
1036	10.0747	20.4745	16.2496	13.3247	17.2246	18.5245	15.2746	13.6497	20.4745	18.8495
1037	10.0747	20.4745	16.2496	13.6497	17.5496	18.1995	15.2746	14.6246	20.4745	17.5496
1038	10.0747	20.4745	16.8996	13.6497	17.5496	18.8495	14.9496	14.9496	19.8245	17.5496
1039	10.0747	20.1495	16.5746	12.9997	17.2246	18.8495	14.9496	14.9496	20.7995	18.5245
1040	10.0747	20.4745	15.5996	13.3247	17.2246	18.5245	14.9496	13.9747	20.7995	18.5245
1041	10.0747	20.4745	15.9246	13.6497	17.2246	18.8495	15.2746	13.9747	21.1245	17.8746
1042	10.0747	20.1495	16.2496	13.6497	17.2246	18.8495	15.5996	13.9747	20.1495	17.8746
1043	9.74976	20.4745	16.5746	13.3247	17.2246	18.5245	15.2746	14.2996	20.7995	18.1995
1044	10.0747	20.4745	16.2496	13.6497	17.2246	18.5245	15.5996	13.9747	20.4745	17.8746
1045	9.74976	20.4745	16.5746	13.3247	16.8996	18.1995	14.9496	13.9747	19.8245	18.1995
1046	10.0747	20.4745	16.5746	13.6497	16.8996	18.1995	15.2746	13.6497	20.1495	18.8495
1047	10.0747	20.1495	15.5996	13.3247	17.2246	18.5245	15.2746	14.2996	20.7995	17.8746
1048	9.74976	20.4745	16.8996	13.6497	16.8996	18.5245	15.2746	13.9747	21.1245	18.5245
1049	10.0747	20.1495	16.2496	13.3247	17.2246	18.5245	14.9496	14.6246	20.1495	18.1995
1050	10.0747	20.4745	16.2496	13.6497	17.5496	18.1995	15.2746	14.2996	20.7995	18.5245
1051	10.0747	20.1495	16.8996	12.9997	17.5496	18.8495	15.2746	13.9747	20.4745	18.1995
1052	9.74976	20.4745	15.9246	12.9997	17.2246	18.5245	15.2746	14.6246	19.8245	18.8495
1053	10.0747	20.4745	16.2496	13.3247	17.2246	18.8495	15.5996	14.9496	21.1245	17.8746
1054	9.74976	20.4745	16.2496	13.3247	16.8996	19.1745	14.9496	14.6246	20.4745	18.5245
1055	9.74976	20.4745	16.2496	13.6497	17.5496	18.5245	15.2746	14.2996	19.8245	19.1745
1056	10.0747	20.1495	16.5746	13.6497	17.2246	18.5245	15.2746	14.2996	19.8245	18.1995
1057	9.74976	20.1495	16.5746	13.3247	17.5496	18.8495	14.9496	14.9496	19.8245	17.8746
1058	10.0747	20.1495	16.2496	13.3247	17.5496	18.8495	14.9496	15.2746	20.1495	18.1995
1059	10.0747	20.1495	15.9246	13.3247	17.2246	19.1745	14.9496	14.6246	19.8245	18.5245
1060	10.0747	20.4745	15.9246	13.3247	17.2246	18.8495	14.9496	14.6246	20.4745	17.8746
1061	10.0747	20.4745	15.9246	13.3247	17.2246	18.8495	15.2746	14.2996	20.4745	18.1995
1062	10.0747	20.4745	15.5996	13.6497	17.2246	18.8495	15.5996	13.9747	20.4745	17.8746
1063	10.0747	20.1495	15.9246	13.3247	17.5496	18.8495	15.5996	13.9747	20.4745	18.8495
1064	10.0747	20.4745	15.9246	13.3247	17.2246	18.8495	15.5996	14.6246	20.4745	17.2246
1065	10.0747	20.1495	16.8996	13.9747	17.2246	18.8495	14.9496	14.6246	19.4995	17.8746
1066	9.74976	20.4745	15.9246	13.9747	17.2246	18.8495	14.9496	14.6246	19.4995	18.5245
1067	9.74976	20.4745	17.5496	13.6497	17.2246	18.8495	15.5996	13.9747	19.8245	18.5245
1068	9.74976	20.1495	16.5746	13.9747	17.2246	18.5245	14.9496	14.6246	20.1495	18.5245
1069	9.74976	20.1495	15.9246	13.9747	17.2246	18.5245	15.2746	14.6246	20.1495	17.8746
1070	10.0747	20.4745	16.2496	13.6497	17.2246	18.8495	14.9496	14.6246	20.7995	18.5245
1071	9.74976	20.4745	15.9246	13.9747	17.2246	18.8495	15.2746	14.2996	20.7995	18.5245
1072	10.0747	20.1495	16.2496	13.3247	17.5496	18.5245	15.2746	14.2996	20.7995	18.5245
1073	9.74976	20.4745	16.8996	13.3247	16.8996	19.1745	15.2746	13.9747	20.7995	18.8495
1074	10.0747	20.4745	15.9246	13.9747	17.2246	18.8495	15.2746	14.2996	20.1495	18.8495
1075	9.74976	20.1495	15.2746	13.3247	16.8996	19.1745	15.2746	13.9747	20.1495	18.5245
1076	9.74976	20.4745	15.9246	13.3247	17.5496	18.8495	15.2746	13.6497	20.4745	18.5245
1077	10.0747	20.4745	15.5996	13.3247	16.8996	18.8495	15.2746	13.9747	20.4745	17.8746
1078	10.0747	20.1495	15.5996	13.6497	17.2246	18.8495	15.2746	13.9747	19.8245	17.2246
1079	9.74976	20.4745	16.5746	13.3247	17.2246	18.8495	15.2746	13.9747	20.1495	18.5245
1080	9.74976	20.4745	15.9246	13.3247	17.2246	19.4995	15.2746	13.6497	19.8245	18.8495
1081	9.74976	20.4745	16.2496	12.9997	17.2246	19.1745	14.9496	13.9747	20.4745	18.8495
1082	10.0747	20.1495	16.2496	13.3247	17.2246	19.8245	15.5996	13.9747	20.1495	18.1995
1083	9.74976	20.1495	16.5746	13.3247	17.2246	19.1745	14.9496	13.9747	20.1495	18.5245
1084	9.74976	20.1495	15.9246	13.3247	17.2246	19.4995	15.2746	13.9747	20.1495	18.1995
1085	9.42476	20.4745	15.9246	13.3247	17.2246	19.1745	15.2746	13.9747	20.1495	18.5245
1086	9.74976	20.4745	16.2496	13.6497	17.5496	19.1745	15.2746	13.6497	20.7995	17.8746
1087	9.74976	20.1495	15.9246	13.6497	17.2246	19.4995	15.2746	13.3247	20.7995	19.1745
1088	9.74976	20.4745	16.2496	13.3247	17.2246	19.1745	15.2746	13.6497	20.7995	17.8746
1089	9.74976	20.4745	15.9246	13.3247	17.2246	19.1745	15.2746	13.3247	21.1245	19.1745
1090	9.74976	20.4745	15.9246	13.3247	17.2246	19.1745	15.2746	13.9747	20.7995	18.5245
1091	10.0747	20.1495	15.9246	13.6497	17.2246	19.1745	15.2746	13.9747	21.1245	18.5245
1092	9.74976	20.1495	16.2496	12.9997	16.8996	19.4995	15.5996	13.9747	20.7995	18.8495
1093	10.0747	20.4745	16.2496	13.6497	17.5496	19.4995	15.2746	13.9747	20.7995	18.1995
1094	9.74976	20.4745	16.5746	13.3247	16.8996	19.4995	15.2746	13.9747	20.4745	18.8495
1095	9.74976	20.4745	15.2746	12.9997	16.8996	19.4995	15.2746	14.2996	20.7995	18.5245
1096	10.0747	20.1495	16.2496	13.3247	17.5496	19.4995	15.5996	13.9747	20.4745	18.1995
1097	10.0747	20.1495	15.5996	13.6497	16.8996	19.4995	15.2746	13.9747	20.7995	18.5245
1098	9.42476	20.1495	16.5746	13.6497	17.2246	19.4995	15.2746	13.9747	21.4495	18.5245
1099	9.74976	20.1495	16.8996	13.9747	17.2246	19.4995	15.5996	13.9747	21.4495	18.1995
1100	9.74976	20.4745	15.5996	13.6497	17.2246	19.1745	15.2746	13.9747	21.1245	18.1995
1101	9.74976	20.1495	16.2496	12.9997	17.2246	19.4995	15.2746	13.9747	20.4745	18.8495
1102	10.0747	20.1495	15.5996	13.3247	17.2246	19.1745	15.2746	13.9747	20.7995	18.5245
1103	10.0747	20.4745	16.5746	13.3247	17.5496	19.4995	15.5996	13.9747	20.7995	18.5245
1104	9.74976	20.1495	16.2496	12.9997	16.8996	19.4995	15.2746	14.2996	20.7995	18.1995
1105	9.74976	20.4745	15.9246	13.6497	17.5496	19.4995	15.2746	14.2996	20.7995	17.8746
1106	10.0747	20.4745	16.5746	13.3247	17.2246	19.1745	15.2746	13.6497	20.4745	18.8495
1107	9.42476	20.1495	16.2496	13.6497	17.5496	19.4995	15.2746	13.9747	20.4745	18.1995
1108	9.74976	20.4745	15.9246	13.3247	17.5496	19.1745	15.2746	13.9747	21.1245	18.5245
1109	9.74976	20.4745	15.9246	13.6497	17.2246	19.4995	15.2746	13.6497	20.7995	18.1995
1110	9.74976	20.1495	16.2496	13.9747	17.2246	19.4995	15.5996	13.9747	20.4745	18.1995
1111	9.74976	19.8245	16.5746	13.9747	17.5496	19.4995	15.5996	13.6497	20.7995	18.1995
1112	9.74976	20.1495	16.5746	13.6497	17.2246	19.4995	15.2746	14.2996	20.4745	18.8495
1113	9.74976	19.8245	15.5996	13.3247	17.5496	19.4995	15.2746	13.9747	20.7995	18.1995
1114	9.74976	20.1495	16.8996	13.9747	17.2246	19.4995	14.9496	13.9747	20.7995	18.5245
1115	9.74976	20.1495	15.9246	13.6497	16.8996	19.8245	15.5996	14.2996	20.7995	18.8495
1116	9.74976	20.4745	16.8996	13.6497	17.2246	19.4995	15.2746	13.9747	20.7995	18.5245
1117	10.0747	19.8245	15.9246	13.6497	17.5496	19.4995	15.5996	14.2996	20.7995	18.5245
1118	9.42476	20.4745	16.2496	13.6497	17.2246	19.8245	15.2746	14.6246	20.4745	19.1745
1119	9.42476	20.1495	16.2496	13.9747	16.8996	19.4995	15.2746	14.2996	21.1245	17.8746
1120	10.0747	20.1495	15.5996	13.6497	17.2246	19.4995	15.5996	14.2996	20.7995	18.1995
1121	10.0747	20.1495	16.2496	14.6246	17.2246	19.8245	14.9496	13.9747	20.7995	17.8746
1122	10.0747	20.1495	15.5996	13.6497	17.2246	19.4995	15.2746	14.2996	20.7995	18.1995
1123	9.74976	20.1495	16.2496	13.6497	17.2246	19.4995	15.5996	14.2996	21.1245	18.8495
1124	10.0747	20.1495	16.5746	13.9747	16.8996	19.1745	15.2746	14.6246	20.7995	17.8746
1125	10.0747	19.8245	16.8996	13.6497	17.2246	19.1745	15.2746	14.2996	20.7995	18.1995
1126	10.0747	20.4745	15.9246	13.9747	17.2246	19.4995	15.5996	14.2996	21.1245	18.1995
1127	10.3997	20.4745	15.9246	13.6497	17.5496	19.4995	15.5996	13.9747	20.4745	18.1995
1128	10.0747	20.4745	15.5996	13.9747	17.2246	19.4995	15.2746	13.9747	20.4745	19.1745
1129	10.0747	20.1495	15.5996	13.9747	17.2246	19.4995	15.5996	13.6497	20.7995	17.5496
1130	9.09977	20.1495	16.5746	13.6497	17.2246	19.4995	15.2746	14.2996	20.7995	18.8495
1131	10.0747	20.1495	16.5746	13.6497	16.8996	19.4995	15.2746	14.6246	20.4745	18.5245
1132	10.0747	20.1495	15.2746	13.9747	16.8996	19.4995	15.2746	13.6497	20.1495	18.1995
1133	10.0747	20.1495	15.9246	13.6497	17.2246	19.1745	15.5996	13.9747	20.4745	18.1995
1134	10.0747	20.4745	15.9246	13.6497	17.2246	19.1745	15.2746	13.9747	20.7995	18.1995
1135	10.3997	20.4745	16.2496	13.6497	16.8996	19.1745	14.9496	13.6497	20.7995	17.8746
1136	10.0747	20.4745	16.2496	13.3247	17.2246	19.8245	15.2746	13.9747	20.7995	18.8495
1137	10.3997	20.4745	16.5746	13.3247	17.2246	19.8245	15.2746	13.9747	20.7995	18.5245
1138	10.0747	20.1495	15.5996	13.6497	17.2246	19.4995	15.2746	14.6246	20.1495	18.1995
1139	10.3997	20.1495	16.2496	13.6497	17.2246	19.8245	14.9496	14.2996	19.4995	17.8746
1140	9.74976	20.4745	15.2746	13.9747	17.2246	19.8245	15.5996	14.2996	20.1495	18.5245
1141	10.0747	20.1495	15.9246	13.6497	16.8996	19.8245	15.2746	14.2996	20.1495	18.1995
1142	10.3997	20.1495	15.2746	13.3247	17.2246	19.4995	15.2746	14.6246	20.4745	18.5245
1143	9.74976	20.1495	16.8996	13.9747	16.8996	19.4995	15.5996	13.9747	20.7995	18.8495
1144	9.74976	20.1495	16.5746	13.3247	16.8996	19.4995	14.9496	13.9747	20.7995	19.1745
1145	9.74976	20.1495	16.2496	13.9747	16.8996	19.8245	15.2746	14.2996	20.1495	18.5245
1146	10.0747	20.4745	15.9246	13.6497	17.2246	19.4995	15.5996	13.6497	20.7995	18.1995
1147	10.0747	20.1495	15.9246	13.6497	17.2246	19.4995	15.2746	14.2996	20.4745	18.1995
1148	10.0747	20.1495	15.9246	13.9747	17.2246	19.4995	14.9496	13.6497	20.7995	18.8495
1149	10.0747	20.1495	15.5996	13.3247	17.2246	20.1495	15.5996	14.6246	20.7995	18.5245
1150	10.0747	20.1495	16.5746	13.9747	17.2246	19.8245	15.5996	14.9496	20.7995	18.8495
1151	10.0747	20.1495	16.2496	13.6497	17.2246	19.1745	15.2746	14.9496	20.7995	18.5245
1152	10.0747	20.1495	15.9246	13.9747	17.2246	19.4995	15.2746	14.6246	20.7995	18.8495
1153	10.0747	20.4745	14.9496	13.3247	17.2246	19.4995	15.5996	14.2996	20.7995	18.8495
1154	10.3997	20.1495	16.8996	13.6497	16.8996	19.4995	15.2746	14.6246	20.4745	19.1745
1155	10.0747	20.1495	16.2496	13.9747	17.2246	19.8245	15.5996	14.9496	20.4745	18.8495
1156	10.7247	20.1495	16.2496	14.2996	16.8996	18.8495	15.5996	14.2996	20.4745	18.5245
1157	10.0747	20.1495	16.2496	13.6497	16.8996	18.8495	15.5996	14.2996	19.8245	17.8746
1158	10.0747	20.4745	15.5996	13.6497	17.2246	18.8495	15.2746	14.2996	19.8245	18.1995
1159	10.0747	19.8245	16.2496	13.9747	16.8996	19.4995	15.2746	14.6246	20.1495	18.5245
1160	10.0747	20.1495	16.2496	13.9747	17.2246	19.4995	15.2746	13.6497	20.7995	18.5245
1161	10.0747	19.8245	16.5746	13.9747	17.2246	19.1745	15.5996	14.2996	20.1495	18.1995
1162	10.0747	20.1495	15.5996	13.9747	16.8996	19.4995	15.2746	14.2996	21.1245	18.5245
1163	10.0747	20.1495	15.9246	13.9747	17.2246	19.4995	14.9496	13.6497	20.4745	17.8746
1164	10.0747	20.1495	15.5996	13.9747	16.8996	19.8245	15.2746	14.2996	20.4745	18.5245
1165	10.0747	20.1495	15.2746	13.6497	17.2246	19.4995	15.2746	14.6246	20.7995	18.1995
1166	10.0747	20.4745	16.5746	14.2996	16.8996	19.8245	15.2746	13.9747	21.1245	18.5245
1167	10.3997	20.1495	16.2496	13.9747	16.8996	19.4995	15.2746	13.6497	21.1245	17.8746
1168	10.0747	20.4745	16.5746	13.9747	17.5496	19.1745	15.2746	12.9997	20.4745	18.1995
1169	10.0747	20.1495	15.5996	13.9747	16.8996	19.4995	14.9496	13.3247	20.7995	17.8746
1170	9.74976	20.4745	15.9246	13.6497	17.2246	18.8495	15.2746	13.3247	20.4745	18.1995
1171	9.74976	20.4745	16.5746	13.3247	16.8996	19.4995	15.2746	14.6246	20.7995	17.8746
1172	10.0747	20.4745	15.9246	13.9747	17.2246	19.4995	15.2746	14.6246	20.7995	18.8495
1173	10.0747	20.4745	16.5746	13.6497	17.2246	19.1745	15.5996	14.2996	20.7995	18.8495
1174	9.74976	20.4745	16.2496	13.9747	17.2246	19.1745	14.9496	13.9747	20.4745	17.2246
1175	10.0747	20.1495	15.5996	13.6497	16.8996	19.4995	15.2746	13.9747	21.1245	17.8746
1176	10.0747	20.1495	15.9246	13.6497	17.5496	19.4995	15.5996	14.6246	21.1245	18.5245
1177	9.74976	20.1495	15.9246	13.9747	17.2246	19.1745	15.5996	14.2996	20.7995	17.5496
1178	10.0747	20.4745	16.2496	13.6497	16.8996	19.1745	15.2746	14.2996	20.7995	17.8746
1179	9.74976	20.4745	16.2496	13.6497	17.2246	19.1745	14.9496	14.6246	20.7995	18.1995
1180	9.74976	20.4745	16.5746	13.3247	17.2246	19.1745	15.2746	14.2996	21.4495	17.8746
1181	9.74976	20.4745	16.2496	13.6497	16.8996	19.1745	14.6246	14.2996	21.1245	18.5245
1182	9.74976	20.1495	15.9246	13.3247	16.8996	19.4995	15.2746	14.2996	21.4495	18.5245
1183	9.74976	20.1495	15.2746	13.6497	17.2246	19.1745	15.2746	14.2996	20.7995	17.8746
1184	10.0747	20.1495	16.2496	13.9747	17.2246	19.1745	15.5996	13.9747	21.1245	17.5496
1185	9.74976	20.1495	15.9246	13.3247	17.2246	19.1745	15.2746	14.6246	20.7995	17.8746
1186	10.0747	20.4745	15.9246	13.6497	17.2246	19.4995	14.9496	14.2996	21.1245	18.5245
1187	10.0747	20.1495	16.5746	13.6497	17.2246	19.4995	15.5996	13.9747	20.4745	17.8746
1188	9.09977	19.8245	15.5996	13.9747	16.8996	19.4995	14.2996	13.6497	20.7995	17.8746
1189	10.0747	20.1495	16.2496	13.6497	17.2246	19.4995	15.2746	13.9747	21.1245	18.1995
1190	9.74976	20.1495	15.9246	13.6497	16.8996	19.4995	15.2746	13.6497	21.1245	18.1995
1191	9.74976	20.4745	15.2746	13.6497	16.8996	19.4995	14.9496	13.9747	20.7995	18.1995
1192	10.0747	20.1495	16.2496	13.9747	17.2246	19.4995	14.9496	13.6497	21.1245	17.8746
1193	9.09977	20.1495	15.5996	13.9747	16.8996	19.4995	15.9246	13.6497	20.7995	17.5496
1194	9.74976	20.4745	16.2496	13.6497	17.2246	19.4995	15.2746	13.6497	21.4495	18.1995
1195	9.74976	20.1495	15.9246	13.9747	16.8996	19.8245	15.2746	13.9747	20.7995	18.1995
1196	10.0747	20.4745	15.9246	13.6497	17.2246	19.4995	15.2746	13.9747	21.1245	17.5496
1197	9.74976	20.4745	16.5746	13.9747	16.8996	19.4995	15.2746	14.2996	21.1245	18.1995
1198	10.0747	20.1495	16.5746	13.9747	17.2246	19.4995	15.2746	14.2996	21.4495	18.1995
1199	10.0747	20.1495	16.2496	13.9747	17.2246	19.4995	15.2746	14.2996	20.7995	18.1995
1200	9.74976	20.1495	16.5746	13.6497	17.5496	19.4995	15.2746	14.2996	20.7995	17.8746
1201	9.74976	20.4745	16.2496	13.9747	17.2246	19.4995	15.2746	13.9747	21.4495	17.8746
1202	9.74976	20.1495	15.9246	13.9747	16.8996	19.1745	15.5996	14.6246	21.1245	18.5245
1203	9.74976	20.4745	16.5746	13.6497	16.8996	19.1745	15.2746	14.2996	21.1245	17.2246
1204	9.74976	20.1495	15.9246	13.9747	17.2246	19.4995	14.9496	14.2996	21.7745	18.1995
1205	10.0747	20.4745	16.2496	13.9747	16.8996	18.8495	14.9496	13.9747	21.1245	17.5496
1206	10.0747	20.1495	15.9246	13.6497	17.2246	19.1745	15.2746	13.6497	21.4495	18.5245
1207	9.74976	19.8245	16.5746	13.9747	16.8996	18.8495	15.2746	12.9997	21.1245	18.1995
1208	9.74976	19.8245	15.9246	13.6497	17.2246	19.1745	15.2746	13.6497	21.1245	17.8746
1209	10.0747	20.1495	16.5746	13.6497	17.2246	19.1745	15.2746	13.6497	21.4495	17.5496
1210	10.0747	20.4745	16.5746	13.6497	16.8996	19.1745	15.2746	13.9747	21.1245	18.1995
1211	10.0747	20.4745	16.5746	13.9747	17.2246	19.1745	15.5996	13.9747	21.4495	18.1995
1212	9.74976	20.4745	15.9246	13.6497	17.2246	19.4995	15.5996	13.6497	21.4495	17.8746
1213	9.74976	20.4745	15.5996	13.6497	17.2246	19.1745	15.5996	13.9747	21.1245	17.8746
1214	9.74976	20.1495	16.2496	13.6497	17.2246	19.4995	15.2746	13.9747	21.4495	17.8746
1215	9.74976	19.8245	16.2496	13.9747	17.2246	19.4995	15.2746	13.9747	21.4495	18.1995
1216	9.74976	20.1495	16.2496	13.9747	17.2246	19.1745	15.2746	13.9747	21.1245	18.1995
1217	9.74976	20.1495	16.2496	13.3247	17.2246	19.4995	15.2746	13.3247	20.7995	18.1995
1218	9.74976	20.1495	16.5746	13.9747	16.5746	19.4995	14.9496	13.6497	21.1245	18.1995
1219	9.74976	20.1495	15.2746	13.6497	17.2246	19.4995	15.2746	12.9997	21.1245	19.1745
1220	9.74976	20.4745	16.2496	13.6497	17.2246	19.4995	15.2746	13.3247	21.1245	18.8495
1221	10.0747	20.1495	15.9246	13.6497	17.2246	19.4995	15.5996	13.6497	21.1245	18.1995
1222	9.74976	20.4745	15.9246	13.9747	17.2246	19.1745	15.2746	13.3247	21.1245	18.5245
1223	10.0747	20.4745	16.5746	13.6497	17.2246	19.1745	15.2746	13.6497	21.4495	18.1995
1224	9.74976	20.1495	16.2496	13.9747	17.2246	18.8495	15.5996	13.3247	21.7745	18.1995
1225	10.0747	20.4745	15.9246	13.9747	17.2246	19.1745	15.2746	13.9747	21.4495	18.5245
1226	10.0747	19.8245	15.5996	13.6497	17.2246	19.1745	15.2746	13.3247	21.4495	17.8746
1227	9.42476	20.1495	15.2746	13.9747	17.2246	18.8495	15.5996	13.6497	21.4495	18.1995
1228	9.74976	20.4745	15.9246	14.2996	17.2246	19.4995	15.5996	13.3247	21.1245	17.5496
1229	10.0747	20.1495	16.5746	13.9747	17.2246	18.8495	15.5996	13.9747	21.4495	17.8746
1230	10.0747	20.1495	15.9246	13.9747	17.2246	18.8495	15.2746	13.6497	21.4495	17.8746
1231	9.42476	20.1495	15.9246	13.6497	17.2246	19.1745	15.2746	13.9747	21.4495	17.8746
1232	9.74976	20.4745	16.5746	13.9747	17.2246	19.1745	15.2746	13.6497	21.7745	17.8746
1233	9.74976	20.4745	16.2496	13.6497	17.2246	19.1745	15.2746	13.6497	21.4495	17.5496
1234	9.74976	20.4745	15.9246	13.9747	16.8996	19.1745	15.5996	13.6497	21.4495	17.8746
1235	9.42476	20.4745	16.5746	13.6497	17.2246	19.1745	14.9496	13.9747	21.4495	17.2246
1236	9.74976	20.1495	15.2746	13.6497	17.2246	19.1745	15.5996	14.6246	21.7745	17.8746
1237	9.74976	20.4745	16.2496	13.9747	17.2246	19.1745	15.5996	13.9747	21.7745	17.8746
1238	9.74976	20.1495	15.9246	13.9747	16.8996	19.1745	15.5996	14.2996	21.4495	19.1745
1239	10.0747	20.1495	15.9246	13.6497	16.8996	18.8495	15.5996	14.2996	21.4495	18.1995
1240	10.0747	20.4745	15.5996	13.6497	17.2246	19.1745	15.5996	14.2996	21.4495	17.5496
1241	9.74976	20.4745	15.5996	13.6497	17.2246	18.8495	15.2746	14.2996	21.7745	18.1995
1242	10.3997	20.4745	15.2746	13.6497	17.2246	19.1745	15.5996	14.2996	21.7745	18.1995
1243	10.0747	20.4745	15.5996	13.6497	17.2246	19.1745	15.2746	14.6246	21.7745	17.8746
1244	9.42476	20.4745	15.5996	13.9747	17.2246	19.4995	15.2746	14.6246	22.0994	18.5245
1245	9.74976	20.4745	16.2496	14.2996	17.2246	19.4995	15.5996	14.2996	21.4495	18.1995
1246	9.74976	20.4745	16.2496	13.9747	17.2246	18.8495	15.2746	13.9747	21.7745	17.5496
1247	9.74976	20.1495	15.2746	14.2996	17.2246	18.8495	15.5996	13.6497	21.4495	17.2246
1248	9.09977	20.1495	15.9246	13.9747	16.8996	19.4995	15.2746	14.2996	21.1245	18.1995
1249	9.74976	20.4745	16.5746	13.6497	17.2246	19.1745	15.5996	13.9747	21.4495	18.1995
1250	9.74976	20.4745	16.2496	13.9747	17.2246	19.4995	15.2746	13.6497	21.4495	18.1995
1251	9.74976	20.1495	15.9246	13.9747	17.2246	19.4995	15.5996	14.2996	21.4495	18.1995
1252	9.74976	20.1495	16.5746	13.9747	16.8996	19.8245	14.9496	13.9747	21.1245	17.8746
1253	9.74976	20.4745	15.9246	13.9747	17.2246	19.4995	15.5996	13.9747	21.4495	17.8746
1254	9.74976	20.1495	15.9246	13.9747	17.2246	19.8245	14.9496	13.6497	21.4495	18.8495
1255	10.0747	20.1495	15.2746	13.9747	17.2246	20.1495	15.2746	13.9747	21.4495	18.1995
1256	10.0747	20.1495	16.5746	13.9747	17.2246	20.1495	15.2746	13.6497	21.1245	18.5245
1257	10.0747	20.4745	15.2746	14.2996	17.2246	20.1495	15.5996	13.6497	21.7745	18.1995
1258	9.74976	20.1495	15.9246	13.9747	17.5496	19.8245	15.5996	13.9747	21.1245	18.5245
1259	9.74976	20.1495	16.2496	13.6497	17.2246	19.8245	15.2746	12.9997	21.4495	18.8495
1260	9.74976	20.1495	15.5996	13.9747	17.2246	19.8245	15.5996	13.6497	21.4495	18.5245
1261	9.74976	20.4745	15.9246	13.6497	16.8996	19.8245	15.5996	13.9747	21.4495	18.8495
1262	9.74976	20.1495	16.5746	13.9747	17.2246	19.8245	14.9496	14.2996	21.7745	18.1995
1263	10.0747	19.8245	15.5996	13.6497	17.2246	19.8245	15.5996	13.9747	20.7995	18.1995
1264	10.0747	20.4745	15.9246	13.6497	16.8996	19.4995	15.5996	13.3247	21.7745	17.5496
1265	10.0747	20.1495	16.5746	13.9747	17.2246	19.8245	15.5996	13.9747	21.4495	18.8495
1266	9.74976	20.1495	15.5996	13.6497	17.5496	19.4995	15.5996	13.6497	21.4495	18.1995
1267	10.3997	20.1495	15.5996	13.6497	16.5746	19.8245	15.5996	13.6497	21.7745	17.8746
1268	10.0747	20.1495	15.2746	13.9747	17.2246	19.8245	15.2746	13.6497	21.7745	17.8746
1269	9.74976	20.1495	15.9246	13.9747	17.2246	19.4995	15.5996	13.6497	21.7745	17.8746
1270	10.0747	20.4745	14.9496	13.9747	17.2246	19.4995	14.9496	13.6497	21.4495	18.5245
1271	9.74976	20.1495	16.2496	13.6497	17.2246	19.8245	15.5996	13.3247	21.4495	17.8746
1272	9.74976	20.1495	14.9496	13.9747	16.8996	19.4995	15.2746	13.3247	21.4495	18.1995
1273	9.74976	20.4745	15.5996	13.9747	16.8996	19.4995	15.5996	12.9997	21.4495	17.8746
1274	9.42476	20.4745	15.5996	13.6497	16.8996	19.8245	15.5996	13.3247	22.0994	17.8746
1275	9.74976	20.1495	15.9246	13.9747	17.2246	19.4995	15.2746	12.6747	21.7745	18.1995
1276	10.0747	20.4745	15.5996	13.6497	17.2246	19.8245	14.9496	13.3247	21.7745	18.5245
1277	10.0747	20.1495	15.9246	13.9747	17.2246	20.1495	15.5996	13.3247	21.4495	17.2246
1278	9.42476	20.1495	14.9496	14.2996	17.2246	19.8245	15.5996	12.6747	21.7745	18.5245
1279	10.0747	20.1495	15.2746	13.9747	17.2246	19.8245	15.5996	13.3247	21.7745	18.1995
1280	9.74976	20.1495	15.2746	14.2996	17.2246	19.8245	15.5996	13.6497	22.0994	18.5245
1281	9.74976	20.4745	15.5996	14.2996	16.8996	20.1495	15.2746	13.6497	21.7745	18.5245
1282	10.0747	20.4745	15.5996	14.2996	17.2246	20.1495	15.2746	13.6497	22.0994	18.8495
1283	9.74976	20.1495	15.2746	13.9747	16.8996	20.1495	15.5996	13.3247	21.4495	17.8746
1284	10.0747	20.1495	16.2496	13.9747	16.8996	20.1495	15.5996	12.6747	21.4495	18.5245
1285	10.0747	20.4745	14.9496	13.9747	17.2246	20.1495	15.5996	13.6497	22.0994	18.8495
1286	9.74976	20.1495	15.5996	14.2996	16.8996	20.1495	15.5996	14.6246	22.0994	18.1995
1287	10.0747	20.1495	15.2746	13.9747	17.2246	19.8245	15.2746	13.3247	21.1245	17.8746
1288	10.0747	20.4745	15.9246	14.2996	17.2246	20.1495	15.2746	13.6497	22.0994	18.5245
1289	10.0747	20.1495	15.2746	13.9747	17.2246	20.1495	15.5996	12.9997	21.4495	18.5245
1290	9.74976	19.8245	15.2746	13.9747	16.8996	20.1495	15.5996	13.3247	21.7745	18.1995
1291	10.0747	19.8245	15.9246	13.9747	16.8996	19.8245	15.5996	12.9997	22.0994	17.8746
1292	10.3997	19.8245	15.9246	13.6497	17.2246	20.1495	15.5996	12.9997	21.4495	17.5496
1293	10.0747	20.1495	15.2746	14.2996	16.8996	19.8245	15.5996	13.3247	21.4495	17.8746
1294	9.74976	19.8245	15.2746	14.6246	17.2246	19.8245	14.9496	13.3247	21.4495	18.5245
1295	10.0747	19.8245	15.5996	13.9747	16.8996	19.8245	15.2746	12.9997	21.7745	17.8746
1296	9.42476	20.1495	14.9496	13.9747	17.2246	19.8245	15.2746	13.3247	21.7745	18.1995
1297	10.0747	19.8245	14.6246	13.9747	16.8996	19.8245	15.5996	12.6747	21.4495	17.2246
1298	9.74976	19.8245	14.6246	13.9747	17.2246	19.8245	15.5996	13.3247	22.0994	17.8746
1299	10.0747	20.1495	15.2746	14.2996	16.8996	19.8245	15.2746	12.9997	21.4495	17.5496
1300	10.0747	20.1495	15.2746	14.2996	16.8996	19.8245	15.5996	13.3247	21.7745	18.5245
1301	10.0747	20.1495	15.9246	14.2996	16.8996	19.4995	15.5996	13.3247	21.7745	18.5245
1302	10.0747	19.8245	15.5996	14.6246	16.8996	19.8245	15.5996	13.3247	21.7745	18.8495
1303	10.0747	20.1495	15.9246	13.6497	17.2246	19.8245	15.9246	12.9997	21.7745	18.1995
1304	10.0747	20.1495	15.2746	14.2996	16.8996	20.1495	15.5996	12.6747	21.7745	17.8746
1305	10.0747	20.1495	15.5996	13.9747	16.8996	20.1495	15.5996	13.3247	21.4495	18.1995
1306	10.3997	20.1495	15.9246	14.2996	17.2246	20.1495	15.5996	12.9997	21.4495	17.5496
1307	10.0747	20.4745	15.5996	14.6246	16.8996	20.1495	15.2746	13.3247	21.4495	17.8746
1308	10.0747	19.8245	14.9496	13.9747	17.5496	19.8245	15.5996	12.9997	21.7745	18.5245
1309	9.74976	20.4745	15.2746	14.2996	17.2246	20.1495	15.5996	12.9997	21.7745	17.5496
1310	10.0747	20.1495	15.5996	13.9747	17.2246	19.8245	15.5996	12.9997	21.4495	17.8746
1311	9.74976	20.1495	15.9246	13.9747	17.2246	19.8245	15.2746	13.6497	21.4495	17.8746
1312	9.74976	20.1495	16.2496	14.2996	17.2246	19.8245	15.5996	13.6497	21.4495	17.8746
1313	9.74976	20.1495	14.9496	14.6246	17.2246	20.1495	15.2746	13.6497	21.7745	18.5245
1314	9.74976	19.8245	15.5996	14.6246	16.8996	19.8245	15.2746	13.6497	21.4495	18.1995
1315	9.74976	20.1495	15.9246	14.6246	16.8996	19.8245	15.2746	13.3247	21.4495	18.1995
1316	9.74976	19.8245	15.2746	13.9747	16.5746	20.1495	15.5996	13.6497	21.4495	18.8495
1317	9.74976	20.1495	15.9246	14.6246	16.2496	20.1495	15.5996	13.3247	21.4495	18.5245
1318	10.0747	20.1495	15.5996	13.9747	16.8996	19.8245	15.5996	13.3247	22.0994	17.2246
1319	10.0747	20.1495	14.9496	14.2996	16.8996	19.8245	15.5996	13.3247	22.0994	17.8746
1320	9.74976	19.8245	16.2496	13.9747	16.8996	19.4995	15.5996	13.3247	21.7745	16.8996
1321	9.74976	20.1495	15.2746	14.9496	16.5746	19.4995	14.9496	12.9997	21.4495	18.1995
1322	9.74976	20.1495	16.5746	14.2996	16.5746	19.4995	15.5996	13.3247	21.7745	18.1995
1323	10.0747	20.1495	15.9246	14.2996	16.5746	19.4995	15.2746	13.6497	21.4495	19.1745
1324	9.74976	19.8245	14.2996	14.2996	15.9246	20.1495	15.2746	13.6497	21.7745	17.5496
1325	9.74976	19.8245	14.9496	14.2996	16.2496	19.8245	15.9246	13.3247	21.7745	17.5496
1326	10.0747	20.1495	15.2746	14.6246	16.2496	20.4745	15.2746	12.9997	21.4495	17.8746
1327	9.74976	20.1495	14.6246	13.9747	16.2496	19.8245	14.6246	13.3247	21.7745	18.1995
1328	10.0747	20.4745	14.9496	13.9747	16.5746	19.4995	15.2746	13.6497	21.1245	18.1995
1329	9.74976	20.1495	15.9246	13.9747	16.8996	19.8245	15.2746	13.3247	21.7745	18.1995
1330	9.74976	20.4745	14.2996	13.9747	16.2496	20.1495	15.5996	13.6497	20.7995	18.1995
1331	10.0747	20.1495	15.5996	13.9747	16.8996	19.8245	15.5996	13.6497	21.4495	18.1995
1332	9.42476	19.8245	15.9246	14.6246	16.8996	19.8245	15.5996	13.6497	21.1245	17.8746
1333	9.42476	20.1495	16.2496	14.2996	16.5746	19.8245	15.2746	13.9747	21.4495	18.5245
1334	9.42476	20.1495	15.5996	13.9747	16.5746	19.8245	14.9496	13.9747	21.7745	19.1745
1335	9.42476	20.1495	14.9496	14.2996	16.8996	19.8245	15.5996	14.2996	21.7745	19.1745
1336	10.0747	20.4745	14.9496	13.9747	17.2246	19.8245	14.9496	13.9747	21.1245	18.8495
1337	9.74976	20.1495	15.5996	13.9747	16.8996	19.1745	14.9496	13.9747	21.1245	18.1995
1338	9.42476	19.8245	15.2746	13.9747	16.8996	19.4995	15.5996	13.9747	21.7745	17.8746
1339	9.42476	19.8245	15.9246	14.2996	17.2246	19.4995	15.5996	13.6497	21.1245	18.1995
1340	9.74976	20.4745	15.5996	13.9747	17.2246	19.4995	15.5996	13.6497	21.1245	18.1995
1341	10.0747	20.4745	16.2496	14.6246	17.2246	19.8245	15.5996	13.6497	21.4495	18.1995
1342	9.42476	20.1495	14.9496	14.2996	16.8996	20.1495	15.5996	13.3247	21.1245	18.1995
1343	9.42476	20.1495	15.5996	13.9747	16.8996	19.8245	15.5996	13.6497	20.7995	17.5496
1344	9.74976	19.8245	15.5996	13.9747	16.8996	19.8245	15.5996	14.2996	21.4495	18.1995
1345	10.0747	20.1495	15.5996	13.9747	16.8996	20.1495	15.5996	14.2996	21.1245	18.1995
1346	9.74976	20.1495	15.5996	13.9747	16.8996	20.1495	15.2746	14.2996	21.7745	17.8746
1347	9.74976	20.1495	14.9496	14.2996	16.8996	19.8245	15.5996	13.6497	21.1245	19.1745
1348	9.42476	20.1495	16.5746	14.2996	17.2246	20.1495	15.2746	13.9747	21.1245	18.1995
1349	9.74976	20.7995	14.9496	13.9747	17.5496	20.1495	15.2746	13.9747	21.1245	17.5496
1350	9.74976	20.4745	15.9246	14.2996	17.2246	19.8245	15.2746	13.9747	20.7995	18.1995
1351	9.74976	20.1495	15.9246	14.2996	17.2246	20.1495	15.2746	13.9747	21.7745	18.5245
1352	9.74976	20.1495	15.5996	14.2996	17.8746	20.1495	15.2746	13.3247	21.4495	17.8746
1353	9.74976	20.4745	15.2746	14.2996	17.8746	20.1495	15.2746	13.9747	21.4495	16.8996
1354	9.42476	20.1495	15.9246	13.9747	17.5496	19.8245	15.2746	13.9747	21.4495	18.1995
1355	9.74976	19.8245	15.5996	13.9747	17.5496	19.8245	15.2746	13.9747	21.7745	18.5245
1356	9.42476	19.8245	16.5746	14.2996	17.5496	19.4995	15.9246	13.9747	21.4495	18.1995
1357	9.74976	20.1495	16.2496	13.9747	17.5496	20.1495	15.5996	13.6497	21.4495	17.5496
1358	9.42476	20.4745	15.9246	13.9747	17.5496	20.1495	15.5996	13.6497	21.1245	18.1995
1359	9.42476	20.1495	15.9246	13.9747	17.8746	19.4995	15.2746	12.9997	21.4495	17.8746
1360	9.09977	20.1495	15.2746	13.9747	17.5496	20.1495	15.5996	13.3247	21.4495	18.8495
1361	9.74976	20.1495	15.2746	14.2996	17.5496	20.1495	15.5996	12.9997	21.4495	17.5496
1362	9.09977	20.1495	14.9496	14.6246	17.5496	19.4995	15.5996	14.2996	21.4495	18.1995
1363	9.74976	20.1495	15.2746	13.9747	17.5496	19.4995	15.2746	13.6497	21.7745	18.5245
1364	9.42476	20.1495	15.9246	14.2996	17.5496	19.8245	15.5996	13.3247	21.4495	18.5245
1365	9.74976	20.1495	15.9246	13.9747	17.5496	19.8245	15.5996	13.6497	20.7995	18.5245
1366	9.74976	20.1495	15.9246	13.9747	17.8746	19.8245	15.2746	12.9997	21.1245	17.2246
1367	9.74976	20.4745	15.5996	13.9747	17.8746	19.4995	14.9496	13.3247	21.1245	18.1995
1368	9.74976	20.1495	14.9496	13.9747	17.8746	19.4995	15.2746	13.6497	21.4495	17.2246
1369	9.42476	20.1495	15.5996	13.9747	17.2246	19.8245	14.9496	13.6497	21.4495	18.5245
1370	9.42476	20.1495	15.9246	13.9747	17.5496	19.4995	15.5996	13.3247	21.1245	18.1995
1371	9.74976	20.1495	14.9496	13.9747	17.5496	19.1745	15.2746	12.9997	20.7995	17.2246
1372	9.74976	20.1495	15.2746	14.2996	17.5496	19.8245	15.5996	13.6497	21.1245	17.2246
1373	10.0747	20.1495	16.2496	14.2996	17.5496	19.8245	15.2746	13.9747	20.7995	18.1995
1374	9.09977	20.1495	15.5996	14.2996	17.8746	20.1495	15.2746	13.6497	21.7745	18.8495
1375	9.42476	20.1495	14.9496	14.2996	17.5496	19.4995	14.9496	13.9747	21.1245	18.5245
1376	9.42476	20.4745	15.2746	14.2996	17.5496	19.4995	14.9496	13.6497	21.4495	17.5496
1377	9.74976	20.1495	15.5996	13.9747	17.5496	19.1745	15.2746	13.6497	21.4495	17.8746
1378	9.42476	20.1495	15.2746	13.9747	17.8746	19.1745	15.2746	13.6497	21.4495	18.5245
1379	9.42476	20.1495	15.5996	14.2996	17.5496	19.4995	14.6246	13.9747	21.7745	18.1995
1380	9.42476	20.1495	15.5996	14.2996	17.5496	19.8245	15.5996	13.6497	21.1245	17.8746
1381	9.74976	20.1495	16.2496	14.2996	17.5496	19.1745	15.2746	13.9747	21.1245	17.8746
1382	9.74976	20.1495	15.2746	14.2996	17.5496	19.4995	15.5996	14.2996	21.7745	18.1995
1383	9.42476	20.1495	16.2496	14.2996	17.5496	19.4995	15.2746	14.2996	21.7745	18.5245
1384	9.42476	20.4745	15.2746	14.2996	17.5496	19.4995	14.9496	14.2996	21.4495	18.1995
1385	9.09977	20.1495	15.2746	14.2996	17.5496	19.4995	14.9496	14.2996	21.4495	18.8495
1386	9.42476	20.1495	15.2746	14.2996	17.5496	19.1745	15.5996	14.6246	22.4244	17.8746
1387	9.74976	20.1495	16.2496	14.2996	17.8746	19.4995	15.2746	13.6497	20.7995	17.5496
1388	9.74976	19.8245	15.9246	14.2996	17.5496	19.1745	14.9496	14.2996	21.1245	17.2246
1389	9.74976	19.8245	15.2746	14.2996	17.5496	19.1745	15.2746	14.2996	21.4495	17.8746
1390	9.74976	20.1495	14.6246	14.2996	17.8746	19.4995	15.2746	13.9747	21.7745	17.5496
1391	9.74976	20.1495	16.5746	14.6246	17.8746	19.4995	15.5996	15.2746	21.4495	18.1995
1392	9.74976	20.1495	16.2496	14.2996	17.8746	19.1745	15.2746	14.9496	21.1245	18.5245
1393	9.09977	20.1495	15.9246	14.2996	17.5496	19.4995	15.5996	14.2996	21.4495	18.1995
1394	9.42476	20.1495	15.9246	14.2996	17.8746	19.1745	15.2746	13.6497	21.1245	18.1995
1395	9.42476	19.8245	16.5746	13.6497	17.5496	19.1745	15.5996	13.9747	22.0994	17.8746
1396	9.42476	20.1495	15.9246	14.2996	17.8746	19.1745	15.2746	13.6497	21.4495	17.8746
1397	9.09977	20.1495	16.2496	13.9747	17.5496	19.4995	14.9496	13.6497	21.4495	18.1995
1398	9.74976	20.1495	15.9246	14.2996	17.5496	19.4995	15.2746	12.9997	21.4495	18.1995
1399	9.74976	19.8245	16.2496	13.9747	17.2246	19.8245	14.9496	13.6497	21.4495	17.8746
1400	9.74976	20.1495	15.5996	14.2996	17.5496	19.4995	14.9496	13.9747	21.1245	18.1995
1401	9.74976	19.8245	16.2496	13.9747	17.5496	19.4995	15.2746	13.9747	21.7745	17.5496
1402	10.0747	20.1495	15.2746	14.2996	17.5496	19.4995	15.5996	13.9747	21.4495	17.8746
1403	9.74976	20.1495	16.2496	14.2996	17.5496	19.1745	15.2746	13.9747	21.1245	18.1995
1404	9.74976	20.1495	15.9246	14.6246	17.8746	19.1745	15.2746	14.2996	20.7995	17.8746
1405	9.74976	20.1495	16.2496	14.2996	17.5496	19.1745	14.9496	14.6246	21.1245	18.1995
1406	10.0747	19.8245	15.9246	14.9496	17.5496	19.4995	14.9496	14.2996	20.7995	18.5245
1407	9.42476	19.8245	15.9246	13.9747	17.5496	19.4995	15.5996	13.9747	21.1245	18.1995
1408	9.74976	20.1495	15.5996	14.2996	17.5496	19.8245	15.5996	13.6497	21.1245	17.5496
1409	9.74976	20.4745	15.2746	14.6246	17.5496	19.8245	15.5996	14.2996	21.4495	18.5245
1410	9.42476	20.1495	15.2746	14.2996	17.5496	19.4995	15.2746	13.9747	21.4495	19.1745
1411	9.74976	20.4745	15.5996	14.2996	17.2246	19.4995	15.5996	14.2996	21.1245	18.5245
1412	9.74976	19.8245	15.9246	13.9747	17.5496	19.4995	15.5996	13.6497	21.4495	18.1995
1413	9.74976	20.1495	15.9246	14.6246	17.5496	19.8245	15.5996	13.6497	21.1245	18.5245
1414	9.42476	20.1495	15.9246	13.9747	17.5496	19.4995	15.2746	13.9747	21.1245	17.8746
1415	9.42476	20.4745	15.2746	14.2996	17.5496	19.4995	15.5996	13.6497	21.4495	17.8746
1416	9.74976	20.1495	14.9496	13.9747	17.5496	19.8245	15.2746	13.9747	21.1245	17.8746
1417	9.74976	20.4745	15.5996	13.9747	17.5496	19.4995	15.5996	13.3247	21.7745	18.1995
1418	9.74976	20.1495	16.8996	14.2996	17.2246	19.4995	15.5996	13.3247	21.1245	18.5245
1419	9.74976	20.4745	15.2746	14.2996	17.5496	19.4995	15.2746	14.2996	21.1245	17.8746
1420	9.74976	20.1495	16.2496	13.9747	17.5496	19.4995	15.2746	13.9747	22.0994	17.8746
1421	9.74976	20.1495	14.6246	14.2996	17.2246	19.4995	15.2746	13.9747	21.1245	18.5245
1422	9.42476	20.4745	15.5996	13.9747	17.2246	20.1495	15.5996	14.2996	21.7745	17.5496
1423	9.42476	20.1495	15.2746	13.9747	17.2246	19.4995	15.2746	14.2996	21.1245	17.5496
1424	9.74976	20.4745	14.9496	13.9747	17.2246	19.8245	15.5996	14.6246	21.4495	17.8746
1425	9.74976	20.4745	15.9246	14.2996	17.2246	19.4995	15.2746	13.9747	21.1245	17.8746
1426	9.74976	20.4745	15.2746	13.6497	17.5496	19.4995	15.5996	13.9747	21.4495	18.5245
1427	9.74976	20.1495	15.2746	14.2996	17.2246	19.8245	15.5996	13.3247	21.4495	18.5245
1428	9.74976	20.4745	15.2746	14.2996	17.5496	19.8245	15.5996	13.6497	21.4495	18.5245
1429	9.74976	20.1495	15.9246	13.9747	17.2246	19.8245	15.2746	13.9747	21.1245	18.5245
1430	9.74976	20.4745	15.5996	14.2996	17.2246	20.1495	15.5996	13.9747	21.4495	18.5245
1431	9.74976	20.1495	15.2746	13.9747	17.2246	19.8245	15.2746	13.9747	21.1245	18.1995
1432	9.74976	19.8245	15.5996	13.9747	17.2246	19.8245	15.2746	14.2996	21.4495	18.5245
1433	9.74976	20.1495	15.9246	13.6497	16.8996	19.8245	15.5996	13.9747	21.4495	18.5245
1434	9.42476	20.7995	16.2496	14.2996	17.2246	19.4995	14.9496	14.2996	21.1245	18.1995
1435	9.74976	20.4745	14.9496	13.9747	16.8996	19.4995	15.5996	14.2996	21.4495	18.5245
1436	9.74976	20.4745	15.2746	14.2996	16.8996	19.4995	15.2746	14.2996	21.4495	17.8746
1437	9.74976	20.1495	15.2746	13.9747	17.2246	19.4995	15.5996	13.9747	20.7995	18.5245
1438	9.74976	20.1495	15.2746	13.9747	17.5496	19.4995	15.5996	14.2996	21.7745	18.1995
1439	9.74976	20.4745	15.5996	14.2996	17.2246	19.1745	15.2746	13.9747	21.4495	18.8495
1440	9.42476	20.4745	15.5996	13.9747	17.2246	19.4995	15.5996	14.6246	21.4495	18.1995
1441	9.42476	20.1495	15.9246	14.2996	16.8996	19.4995	14.9496	13.6497	21.7745	17.8746
1442	9.42476	20.1495	15.5996	13.6497	17.2246	19.4995	15.5996	14.2996	21.1245	17.5496
1443	9.42476	20.4745	15.9246	13.9747	17.2246	19.4995	15.5996	14.2996	21.1245	17.5496
1444	9.74976	20.1495	14.9496	14.2996	17.2246	19.4995	15.5996	13.9747	21.4495	18.5245
1445	9.74976	20.1495	14.9496	13.9747	17.2246	19.4995	15.5996	14.2996	21.4495	17.8746
1446	9.74976	20.4745	14.9496	13.9747	17.2246	19.4995	15.5996	14.2996	21.7745	18.5245
1447	9.42476	20.1495	14.6246	14.2996	17.5496	20.1495	15.2746	14.9496	21.4495	17.5496
1448	9.42476	20.4745	15.5996	13.9747	16.8996	19.8245	15.2746	14.6246	22.0994	18.1995
1449	9.74976	19.8245	15.9246	13.9747	17.2246	19.4995	15.5996	14.6246	21.1245	17.8746
1450	9.09977	20.1495	15.9246	14.2996	17.2246	19.8245	15.2746	14.6246	21.1245	17.8746
1451	9.42476	20.4745	15.9246	13.9747	17.2246	19.4995	15.5996	14.6246	21.1245	18.8495
1452	9.74976	20.1495	14.9496	13.9747	17.2246	19.4995	15.2746	14.2996	21.4495	17.2246
1453	9.42476	20.1495	14.6246	13.9747	17.2246	19.1745	14.9496	14.6246	21.4495	19.1745
1454	10.0747	20.1495	15.5996	14.2996	17.2246	19.1745	15.2746	14.6246	21.4495	17.8746
1455	9.42476	20.1495	15.2746	13.9747	16.8996	19.4995	15.2746	14.2996	21.4495	18.1995
1456	9.42476	20.1495	15.2746	13.9747	17.5496	19.1745	15.2746	14.6246	21.4495	18.5245
1457	9.42476	20.1495	15.5996	14.2996	16.8996	19.4995	15.5996	14.6246	21.1245	17.8746
1458	9.42476	19.8245	14.6246	13.9747	17.2246	19.1745	14.9496	13.6497	21.1245	17.8746
1459	9.42476	20.1495	15.9246	13.9747	16.5746	19.1745	15.2746	13.9747	21.4495	18.1995
1460	9.42476	20.1495	15.2746	13.9747	16.8996	19.4995	15.5996	13.6497	21.4495	17.8746
1461	9.42476	20.1495	16.2496	13.9747	16.8996	19.4995	15.5996	14.6246	21.1245	17.8746
1462	9.42476	20.1495	14.6246	13.9747	16.8996	19.4995	15.2746	14.2996	21.4495	18.8495
1463	9.42476	20.1495	15.2746	13.9747	16.8996	19.1745	15.2746	13.9747	21.4495	18.1995
1464	9.42476	20.1495	14.9496	13.9747	17.2246	19.8245	14.9496	14.2996	21.1245	18.1995
1465	9.74976	20.1495	15.9246	13.9747	17.2246	20.1495	15.5996	14.2996	21.1245	17.5496
1466	10.0747	20.1495	15.5996	13.9747	16.8996	19.4995	15.5996	13.9747	21.1245	17.5496
1467	9.42476	20.1495	14.6246	13.9747	16.8996	19.8245	15.2746	14.2996	21.1245	17.5496
1468	9.74976	20.4745	14.9496	14.2996	17.2246	19.8245	15.5996	14.2996	21.1245	18.1995
1469	9.74976	20.1495	14.6246	13.6497	17.2246	19.4995	15.2746	13.6497	21.1245	18.1995
1470	10.0747	20.1495	15.5996	13.9747	16.8996	20.1495	15.2746	13.6497	21.1245	17.5496
1471	10.0747	20.1495	14.6246	13.6497	16.8996	20.1495	15.5996	14.2996	21.7745	17.8746
1472	9.42476	20.1495	14.9496	13.9747	16.8996	19.8245	15.5996	13.9747	21.4495	18.1995
1473	9.74976	20.1495	14.9496	14.2996	16.8996	20.1495	15.5996	13.6497	21.4495	18.1995
1474	9.74976	20.1495	16.5746	14.2996	16.8996	20.4745	15.5996	13.9747	21.4495	17.8746
1475	9.42476	20.4745	15.9246	13.6497	16.8996	20.1495	15.5996	14.9496	21.7745	18.1995
1476	9.74976	20.4745	14.6246	13.9747	17.2246	20.4745	14.9496	14.2996	21.7745	18.5245
1477	9.42476	20.1495	15.9246	13.9747	17.2246	20.4745	15.5996	14.6246	21.7745	18.1995
1478	9.42476	20.4745	15.9246	13.9747	17.5496	20.4745	15.5996	13.9747	21.4495	18.1995
1479	9.74976	19.8245	15.9246	13.9747	17.5496	20.4745	15.5996	13.9747	21.4495	17.8746
1480	10.0747	20.4745	15.5996	13.9747	16.8996	20.4745	15.2746	13.9747	21.7745	18.5245
1481	9.42476	20.1495	15.2746	14.2996	17.2246	20.4745	15.5996	14.2996	21.7745	17.8746
1482	9.74976	20.1495	15.2746	14.2996	17.2246	20.1495	15.5996	13.9747	21.7745	17.5496
1483	9.42476	20.4745	16.2496	13.9747	17.2246	20.1495	15.5996	13.9747	21.7745	18.1995
1484	9.42476	20.1495	14.9496	14.2996	16.8996	20.4745	15.2746	13.9747	21.4495	17.5496
1485	9.09977	20.4745	14.6246	14.2996	17.2246	20.4745	15.2746	13.9747	21.7745	18.1995
1486	9.42476	20.4745	15.2746	14.2996	17.5496	20.4745	15.5996	14.2996	21.7745	18.1995
1487	9.42476	20.1495	16.2496	13.9747	17.5496	20.1495	15.5996	14.2996	21.1245	18.1995
1488	9.74976	20.4745	14.6246	14.2996	17.2246	20.4745	15.5996	14.2996	21.4495	18.1995
1489	9.74976	20.4745	14.2996	14.2996	17.2246	20.1495	15.2746	14.6246	21.4495	17.8746
1490	9.74976	20.4745	15.2746	14.6246	17.2246	19.8245	15.2746	14.2996	21.4495	18.1995
1491	9.74976	20.1495	14.9496	14.6246	17.2246	20.1495	15.5996	14.2996	21.1245	17.8746
1492	9.09977	20.4745	14.9496	14.6246	17.8746	20.1495	15.5996	13.9747	21.4495	17.8746
1493	9.74976	20.4745	15.2746	13.9747	17.8746	20.1495	15.2746	13.9747	21.7745	18.1995
1494	9.74976	20.4745	15.2746	14.2996	17.8746	20.1495	15.5996	14.2996	21.1245	18.5245
1495	9.09977	20.4745	15.2746	14.2996	17.2246	20.1495	15.5996	13.9747	21.4495	17.8746
1496	9.74976	20.4745	14.9496	14.6246	17.5496	20.1495	15.2746	13.9747	21.7745	18.8495
1497	9.74976	20.4745	15.2746	14.2996	17.2246	19.8245	14.9496	13.9747	21.7745	17.8746
1498	9.42476	20.4745	15.2746	13.9747	16.8996	20.1495	15.2746	13.9747	21.7745	18.8495
1499	9.42476	20.1495	15.2746	14.2996	17.2246	20.4745	14.9496	14.6246	21.4495	18.5245
1500	9.42476	20.4745	14.6246	14.6246	16.8996	20.4745	14.9496	14.2996	21.7745	17.8746
1501	9.42476	19.8245	14.9496	14.2996	16.8996	20.4745	14.9496	13.9747	21.4495	18.1995
1502	9.42476	20.4745	15.2746	13.9747	17.2246	20.4745	14.9496	14.2996	21.4495	17.5496
1503	9.74976	20.4745	15.2746	14.2996	16.8996	20.7995	15.2746	13.9747	22.0994	18.5245
1504	9.42476	20.1495	14.2996	13.9747	16.8996	20.4745	14.9496	14.2996	21.7745	18.1995
1505	9.42476	20.4745	14.6246	14.6246	16.8996	20.4745	15.2746	14.2996	21.4495	18.5245
1506	9.74976	20.4745	14.9496	14.2996	17.8746	20.4745	15.2746	14.2996	21.7745	18.1995
1507	9.74976	20.4745	15.5996	14.6246	17.2246	20.7995	15.2746	14.2996	22.0994	17.8746
1508	9.42476	20.1495	15.5996	14.6246	17.2246	21.1245	14.9496	14.2996	21.7745	17.8746
1509	9.42476	20.1495	14.6246	14.2996	17.2246	20.7995	14.6246	14.2996	21.7745	18.5245
1510	9.74976	20.4745	14.9496	14.6246	17.5496	20.7995	14.9496	14.2996	21.4495	18.1995
1511	9.42476	20.1495	15.2746	14.6246	17.5496	20.7995	14.9496	13.9747	21.4495	17.8746
1512	9.74976	20.1495	14.6246	14.6246	17.5496	20.7995	15.5996	14.2996	21.4495	18.5245
1513	9.42476	20.4745	15.9246	14.2996	17.2246	20.7995	15.2746	13.9747	21.4495	17.8746
1514	9.74976	20.4745	15.5996	14.2996	17.5496	20.4745	14.9496	14.2996	21.1245	16.8996
1515	9.42476	20.4745	15.5996	14.2996	17.5496	20.7995	15.2746	13.9747	21.7745	18.1995
1516	9.09977	20.4745	16.5746	14.6246	17.8746	20.4745	14.9496	14.2996	21.7745	18.1995
1517	9.42476	20.1495	16.8996	14.6246	17.2246	20.4745	15.2746	13.9747	21.4495	17.8746
1518	10.0747	20.1495	17.2246	14.2996	17.2246	20.4745	15.5996	14.2996	21.7745	17.8746
1519	9.74976	20.1495	15.9246	14.2996	17.8746	20.7995	15.2746	13.9747	21.4495	17.5496
1520	9.74976	20.4745	16.2496	14.2996	17.5496	20.7995	14.9496	13.9747	21.4495	17.8746
1521	9.42476	20.4745	16.2496	14.6246	17.5496	20.7995	14.9496	13.9747	21.1245	17.8746
1522	9.74976	20.4745	16.2496	14.2996	17.5496	20.4745	15.2746	13.3247	21.7745	18.1995
1523	9.09977	20.4745	16.2496	14.6246	17.8746	20.7995	15.2746	13.3247	21.1245	17.8746
1524	9.42476	20.1495	15.2746	14.6246	17.5496	20.7995	15.2746	13.9747	21.7745	17.5496
1525	9.74976	20.1495	15.2746	14.6246	17.5496	20.4745	15.2746	13.6497	21.4495	17.8746
1526	9.74976	20.1495	16.2496	14.6246	17.8746	20.4745	14.9496	13.6497	21.4495	18.1995
1527	9.74976	20.4745	15.2746	14.6246	17.8746	20.1495	15.2746	13.6497	21.1245	18.1995
1528	9.42476	20.4745	15.2746	13.9747	17.5496	20.7995	15.5996	13.6497	20.7995	18.1995
1529	9.42476	20.1495	14.9496	13.9747	17.5496	20.4745	15.5996	13.6497	21.4495	18.5245
1530	9.74976	20.4745	15.9246	14.6246	17.5496	20.7995	15.5996	12.9997	21.1245	18.1995
1531	9.74976	20.1495	15.9246	13.9747	17.8746	20.7995	15.2746	13.3247	21.1245	18.1995
1532	9.74976	20.1495	15.2746	14.2996	17.8746	20.7995	15.5996	13.6497	20.7995	18.5245
1533	9.42476	20.1495	15.5996	13.9747	17.5496	20.7995	15.2746	13.9747	20.7995	18.5245
1534	9.42476	20.1495	15.2746	14.6246	17.5496	21.1245	14.9496	14.2996	21.1245	18.5245
1535	9.74976	20.1495	15.9246	14.2996	17.5496	20.4745	14.9496	14.2996	21.4495	18.1995
1536	9.42476	20.1495	16.5746	14.2996	17.5496	21.1245	14.9496	13.6497	20.7995	18.1995
1537	9.74976	20.1495	16.5746	14.2996	17.5496	20.7995	15.5996	14.2996	20.4745	17.8746
1538	9.42476	20.1495	15.9246	14.2996	17.5496	20.7995	15.2746	14.2996	20.7995	17.8746
1539	9.74976	19.8245	14.6246	14.2996	17.5496	21.1245	15.2746	13.6497	21.1245	18.1995
1540	9.42476	19.8245	15.9246	14.2996	17.5496	20.4745	15.5996	13.6497	21.4495	19.1745
1541	9.74976	20.4745	14.9496	14.2996	17.5496	20.4745	14.9496	13.9747	21.1245	18.1995
1542	9.42476	20.1495	14.9496	14.2996	17.5496	21.1245	15.5996	13.9747	21.1245	17.8746
1543	9.74976	20.1495	16.2496	14.2996	17.5496	20.4745	15.2746	13.9747	21.1245	18.5245
1544	9.09977	20.1495	15.5996	13.9747	17.5496	20.4745	15.5996	13.6497	20.4745	17.8746
1545	9.42476	20.1495	15.5996	13.9747	17.5496	20.4745	15.2746	13.6497	21.1245	18.1995
1546	9.74976	20.1495	15.2746	14.2996	17.5496	20.7995	15.5996	13.6497	21.4495	18.5245
1547	9.74976	20.1495	15.9246	14.2996	17.5496	20.7995	14.9496	13.9747	20.7995	17.8746
1548	9.42476	20.1495	15.9246	14.2996	17.5496	20.7995	15.2746	14.2996	20.7995	17.8746
1549	9.74976	20.1495	16.5746	14.2996	17.8746	20.7995	15.2746	13.6497	21.1245	17.8746
1550	9.74976	20.4745	16.2496	14.2996	17.5496	20.4745	15.5996	13.6497	21.1245	17.8746
1551	9.09977	20.1495	15.9246	13.9747	17.5496	20.7995	15.5996	13.9747	21.4495	17.5496
1552	9.09977	20.1495	15.5996	14.2996	17.5496	20.7995	15.2746	13.9747	21.4495	17.2246
1553	9.09977	20.1495	15.5996	14.2996	18.1995	20.4745	15.5996	13.6497	20.7995	18.1995
1554	9.09977	20.4745	15.9246	14.2996	17.5496	20.7995	15.5996	13.9747	21.4495	17.5496
1555	9.42476	20.1495	16.2496	14.2996	17.5496	20.4745	14.9496	13.9747	21.1245	17.8746
1556	9.74976	20.1495	16.8996	14.2996	17.8746	20.7995	15.5996	13.6497	20.7995	18.5245
1557	9.09977	20.1495	15.9246	13.9747	17.5496	20.7995	15.2746	13.6497	21.1245	18.1995
1558	9.74976	20.4745	15.2746	14.2996	17.5496	20.7995	15.2746	13.9747	20.7995	18.1995
1559	10.0747	20.1495	15.9246	14.2996	17.8746	20.7995	15.5996	14.2996	21.1245	17.5496
1560	10.0747	20.1495	16.8996	14.2996	17.5496	20.7995	15.2746	13.9747	20.4745	18.5245
1561	9.74976	20.1495	16.2496	14.2996	17.8746	20.7995	15.2746	14.2996	20.4745	17.5496
1562	9.09977	20.1495	16.2496	14.6246	17.8746	21.1245	14.9496	13.6497	20.7995	18.5245
1563	10.0747	20.1495	15.5996	14.2996	17.8746	20.7995	15.2746	13.6497	21.1245	17.8746
1564	9.09977	20.1495	15.5996	14.2996	17.8746	20.7995	15.2746	13.9747	21.7745	18.8495
1565	9.42476	20.1495	15.2746	14.2996	17.5496	20.7995	15.2746	13.3247	21.7745	17.8746
1566	9.74976	20.1495	16.2496	14.6246	17.5496	20.7995	15.2746	13.3247	21.1245	18.1995
1567	9.74976	20.1495	16.2496	13.9747	17.8746	20.7995	15.5996	13.9747	21.4495	18.1995
1568	9.42476	20.1495	16.8996	14.2996	17.5496	20.7995	14.9496	13.6497	21.4495	18.1995
1569	9.42476	20.1495	14.2996	14.2996	17.8746	20.4745	15.2746	13.6497	21.7745	17.5496
1570	9.74976	20.1495	15.2746	14.2996	17.5496	20.4745	14.9496	13.6497	21.1245	17.8746
1571	9.74976	20.1495	15.2746	14.2996	17.8746	20.7995	14.9496	13.6497	21.7745	18.1995
1572	9.09977	19.8245	15.2746	14.2996	17.5496	20.7995	15.2746	14.2996	20.7995	17.8746
1573	9.42476	20.1495	15.5996	14.2996	17.5496	20.7995	14.9496	13.6497	21.1245	18.1995
1574	9.42476	20.1495	15.9246	13.9747	17.5496	20.7995	15.5996	13.9747	21.4495	18.5245
1575	9.74976	20.1495	14.2996	14.6246	17.5496	20.7995	14.9496	13.6497	21.4495	18.8495
1576	9.42476	20.1495	16.8996	13.6497	17.5496	20.7995	15.5996	13.9747	22.0994	18.1995
1577	10.0747	20.1495	15.9246	14.2996	17.5496	20.7995	15.2746	13.6497	21.1245	17.8746
1578	9.42476	20.1495	14.6246	14.2996	17.5496	20.7995	15.2746	13.9747	21.4495	18.5245
1579	9.74976	20.1495	14.2996	14.2996	17.5496	20.7995	15.5996	13.3247	22.0994	18.1995
1580	9.42476	20.1495	14.9496	14.2996	17.5496	20.7995	14.9496	13.9747	21.1245	18.5245
1581	9.42476	20.1495	14.9496	14.2996	17.5496	20.4745	15.5996	13.6497	21.1245	18.1995
1582	9.74976	20.1495	13.6497	14.2996	17.5496	20.7995	15.2746	13.3247	21.4495	18.1995
1583	9.42476	20.1495	15.5996	14.2996	17.5496	20.7995	15.2746	13.6497	21.4495	18.1995
1584	10.0747	20.1495	13.6497	14.2996	17.2246	20.7995	15.2746	13.6497	21.1245	17.8746
1585	9.42476	20.1495	13.6497	14.2996	17.5496	20.7995	15.2746	13.6497	20.7995	18.1995
1586	9.74976	20.4745	15.2746	14.2996	17.5496	20.7995	15.2746	13.3247	21.1245	18.1995
1587	9.42476	20.1495	15.5996	13.9747	17.2246	20.7995	15.2746	14.2996	20.7995	18.1995
1588	9.74976	20.4745	15.5996	13.9747	17.5496	20.7995	15.2746	13.9747	21.4495	18.5245
1589	9.74976	20.1495	15.5996	13.9747	17.8746	20.7995	15.2746	14.2996	21.1245	18.1995
1590	9.74976	20.1495	15.5996	14.2996	17.5496	20.7995	15.5996	13.3247	21.1245	17.5496
1591	9.09977	20.1495	15.9246	14.2996	17.5496	20.4745	14.9496	13.6497	21.1245	17.5496
1592	9.09977	20.1495	14.6246	13.9747	17.2246	20.7995	15.2746	14.2996	21.1245	18.5245
1593	9.74976	20.1495	15.5996	13.9747	17.8746	20.7995	15.2746	13.6497	21.4495	18.1995
1594	9.74976	20.1495	15.2746	14.2996	17.8746	21.1245	15.2746	13.9747	21.4495	18.1995
1595	9.74976	20.1495	14.9496	14.2996	17.8746	20.4745	14.9496	13.6497	21.4495	17.8746
1596	9.74976	20.1495	15.5996	13.9747	17.5496	20.7995	15.5996	14.2996	21.4495	18.8495
1597	9.42476	20.1495	15.2746	14.2996	17.5496	20.7995	15.2746	14.2996	21.4495	18.1995
1598	9.74976	20.1495	14.6246	13.9747	17.8746	20.7995	15.5996	14.6246	21.4495	17.5496
1599	9.42476	20.1495	12.9997	14.2996	17.5496	20.7995	15.2746	14.2996	21.1245	17.8746
1600	9.74976	20.1495	15.5996	13.9747	17.8746	20.7995	14.9496	13.9747	21.4495	18.1995
1601	9.74976	20.1495	14.2996	14.2996	17.8746	20.7995	15.2746	14.2996	21.1245	17.2246
1602	8.77478	20.1495	16.2496	13.9747	17.5496	20.7995	14.9496	14.6246	21.4495	17.5496
1603	9.42476	20.1495	14.9496	14.2996	17.8746	20.7995	15.2746	13.9747	21.7745	18.5245
1604	9.74976	20.1495	14.9496	13.9747	17.5496	20.7995	15.2746	14.6246	21.4495	18.5245
1605	9.74976	19.8245	15.5996	13.9747	17.5496	20.7995	15.5996	14.6246	21.7745	18.1995
1606	9.42476	20.4745	13.6497	14.2996	17.5496	20.7995	15.2746	14.6246	21.4495	18.1995
1607	9.74976	20.1495	14.9496	14.2996	17.2246	20.4745	15.2746	14.6246	21.1245	18.5245
1608	10.0747	20.1495	13.9747	13.9747	17.2246	20.7995	15.2746	14.2996	21.1245	17.8746
1609	10.0747	20.1495	14.9496	14.2996	17.5496	20.7995	15.2746	14.9496	21.4495	17.8746
1610	9.74976	20.1495	14.9496	13.9747	17.8746	20.7995	14.9496	14.6246	21.7745	17.8746
1611	9.74976	20.1495	14.9496	13.9747	17.5496	20.7995	15.5996	14.2996	21.1245	18.1995
1612	10.0747	19.8245	15.9246	13.9747	17.5496	20.7995	15.2746	14.6246	22.0994	17.8746
1613	9.09977	20.1495	16.2496	14.2996	17.5496	20.7995	15.2746	14.6246	22.0994	17.5496
1614	9.42476	20.1495	15.2746	14.2996	17.2246	20.7995	14.9496	14.6246	21.7745	17.5496
1615	9.74976	20.1495	13.6497	13.9747	17.2246	20.7995	14.9496	14.2996	21.4495	17.5496
1616	9.09977	19.8245	14.6246	13.9747	17.2246	20.7995	15.2746	14.2996	21.7745	17.8746
1617	9.74976	20.1495	15.9246	13.9747	17.2246	20.7995	15.2746	14.6246	21.7745	18.5245
1618	9.42476	19.8245	15.9246	13.9747	17.2246	20.7995	14.9496	13.9747	21.7745	18.1995
1619	9.09977	19.8245	15.9246	14.2996	17.2246	20.1495	15.2746	14.6246	21.7745	18.5245
1620	9.42476	20.1495	16.2496	13.9747	17.5496	20.4745	15.2746	14.9496	21.7745	18.1995
1621	9.74976	20.4745	15.5996	14.2996	17.2246	20.4745	15.2746	14.9496	21.7745	17.8746
1622	9.74976	19.8245	15.5996	14.6246	17.5496	20.1495	14.9496	14.6246	21.4495	18.1995
1623	9.42476	20.1495	14.6246	14.2996	17.2246	20.4745	14.9496	14.6246	21.7745	18.8495
1624	9.42476	20.1495	14.6246	14.2996	17.2246	20.4745	14.9496	14.6246	21.4495	18.1995
1625	9.42476	20.1495	15.9246	14.2996	17.5496	20.7995	15.2746	14.2996	21.7745	18.1995
1626	9.74976	20.4745	14.9496	14.2996	17.2246	20.7995	15.2746	14.2996	21.7745	18.5245
1627	9.74976	20.1495	14.2996	14.2996	17.2246	20.7995	15.2746	14.2996	22.0994	18.5245
1628	9.74976	20.1495	14.6246	13.9747	17.5496	20.7995	15.2746	14.6246	21.7745	17.8746
1629	9.42476	19.8245	14.2996	14.2996	17.5496	20.7995	15.2746	14.2996	22.0994	18.5245
1630	9.09977	20.4745	16.2496	14.2996	17.8746	20.7995	15.2746	14.2996	22.0994	18.5245
1631	9.09977	20.4745	13.9747	14.2996	17.5496	20.7995	15.2746	14.2996	21.7745	18.1995
1632	9.74976	20.1495	15.5996	14.2996	17.5496	20.7995	14.6246	14.6246	21.7745	18.1995
1633	9.42476	20.7995	15.9246	14.2996	17.5496	20.7995	15.2746	14.2996	21.4495	18.5245
1634	9.74976	20.1495	14.2996	14.2996	17.8746	20.7995	14.9496	14.6246	22.0994	19.1745
1635	9.42476	20.1495	14.6246	13.9747	17.8746	20.7995	14.9496	14.2996	21.7745	18.5245
1636	9.74976	19.4995	14.9496	14.2996	17.8746	21.1245	14.9496	13.9747	21.4495	18.1995
1637	9.74976	19.8245	14.9496	14.2996	17.8746	20.7995	15.5996	14.2996	21.7745	18.1995
1638	9.42476	20.1495	14.9496	14.6246	17.5496	20.7995	15.2746	14.6246	21.4495	18.8495
1639	9.74976	20.1495	13.3247	14.6246	17.8746	20.7995	15.2746	14.2996	21.4495	18.8495
1640	9.42476	20.1495	14.9496	13.9747	17.5496	21.1245	15.2746	14.2996	21.7745	17.8746
1641	9.42476	20.1495	14.9496	14.2996	17.5496	20.7995	15.2746	14.2996	21.1245	18.1995
1642	9.74976	19.4995	16.5746	14.2996	18.1995	21.1245	15.5996	14.2996	21.7745	17.8746
1643	9.74976	19.8245	15.2746	14.2996	17.8746	20.7995	14.6246	13.9747	21.4495	18.1995
1644	9.74976	19.8245	15.2746	13.9747	17.5496	20.7995	15.2746	13.9747	22.0994	18.1995
1645	9.74976	20.1495	14.6246	14.2996	17.5496	20.7995	15.2746	14.6246	22.0994	17.8746
1646	9.42476	19.8245	15.2746	14.6246	17.8746	20.7995	15.2746	14.6246	21.7745	17.8746
1647	9.42476	19.8245	16.2496	14.2996	17.8746	20.4745	14.9496	14.2996	21.7745	17.5496
1648	9.42476	20.1495	15.9246	14.2996	17.5496	20.7995	14.6246	14.2996	22.0994	18.5245
1649	9.42476	20.1495	15.5996	14.2996	17.5496	20.4745	14.9496	14.6246	21.7745	18.1995
1650	9.09977	20.1495	15.2746	14.2996	17.8746	20.4745	14.9496	14.2996	21.7745	18.5245
1651	9.74976	20.1495	15.2746	14.2996	17.8746	20.7995	15.2746	14.6246	21.7745	18.1995
1652	9.74976	20.1495	14.9496	14.6246	17.5496	20.7995	14.6246	14.6246	22.0994	18.1995
1653	9.42476	20.1495	15.5996	14.6246	17.8746	20.7995	15.2746	14.6246	22.0994	17.8746
1654	9.42476	19.8245	14.6246	14.2996	17.8746	20.7995	14.9496	14.2996	22.0994	17.8746
1655	9.74976	19.8245	15.5996	14.2996	17.8746	21.1245	15.2746	14.6246	22.0994	18.1995
1656	9.74976	20.1495	16.2496	14.2996	17.2246	20.7995	14.9496	14.6246	22.0994	17.8746
1657	9.09977	19.8245	16.2496	14.2996	17.8746	20.7995	15.2746	14.2996	22.0994	18.5245
1658	9.42476	19.8245	15.2746	14.2996	17.8746	20.7995	15.2746	14.9496	22.0994	18.5245
1659	9.42476	20.1495	14.6246	14.2996	17.8746	20.7995	15.2746	14.9496	22.0994	18.1995
1660	9.09977	20.1495	14.9496	14.2996	17.5496	20.7995	15.2746	14.6246	22.0994	17.8746
1661	9.74976	20.1495	14.9496	13.9747	17.8746	20.7995	15.5996	14.9496	22.4244	17.8746
1662	9.42476	19.8245	15.2746	14.2996	17.8746	20.7995	14.9496	13.9747	22.0994	17.5496
1663	9.74976	19.8245	15.5996	14.2996	17.5496	21.1245	15.2746	13.9747	22.0994	18.1995
1664	9.42476	20.1495	16.5746	14.6246	17.8746	20.7995	15.2746	14.6246	21.7745	18.1995
1665	9.42476	20.1495	15.9246	14.2996	17.5496	21.1245	14.9496	13.9747	22.0994	17.8746
1666	9.74976	20.1495	15.5996	13.9747	17.8746	20.7995	14.9496	13.6497	22.0994	18.1995
1667	9.09977	19.8245	16.5746	14.2996	17.5496	20.7995	14.9496	13.9747	21.7745	17.8746
1668	9.42476	19.8245	14.6246	14.2996	17.5496	21.1245	15.5996	13.3247	21.7745	18.1995
1669	9.74976	19.8245	15.9246	14.2996	17.5496	20.7995	15.2746	13.6497	21.7745	17.8746
1670	9.74976	19.4995	15.9246	14.6246	17.2246	20.7995	14.9496	13.9747	21.7745	18.5245
1671	9.09977	19.8245	13.9747	14.2996	17.5496	21.1245	15.2746	13.6497	21.7745	18.5245
1672	9.42476	20.1495	15.5996	14.2996	17.5496	21.1245	15.2746	13.9747	22.0994	18.5245
1673	8.77478	20.1495	15.5996	14.2996	17.5496	21.1245	15.2746	14.2996	21.7745	18.1995
1674	9.42476	19.8245	15.2746	14.2996	17.5496	21.1245	15.2746	13.6497	22.0994	17.8746
1675	9.09977	20.1495	13.9747	14.2996	17.5496	21.1245	15.2746	13.9747	22.0994	18.5245
1676	9.42476	20.1495	14.6246	14.2996	17.8746	21.1245	14.9496	13.6497	22.0994	18.1995
1677	9.42476	19.8245	15.2746	14.2996	17.8746	21.1245	15.2746	12.6747	22.4244	17.5496
1678	9.42476	20.1495	14.6246	14.2996	17.8746	20.7995	15.2746	14.2996	21.4495	18.8495
1679	9.74976	19.8245	14.2996	14.9496	17.5496	20.7995	15.2746	14.2996	21.7745	18.1995
1680	9.42476	20.1495	14.9496	14.2996	17.2246	20.7995	15.2746	14.2996	22.4244	18.5245
1681	9.42476	19.8245	16.5746	13.6497	17.8746	20.7995	14.9496	14.2996	21.7745	18.1995
1682	9.42476	20.1495	13.6497	14.2996	17.2246	20.7995	15.2746	14.9496	22.4244	17.8746
1683	9.74976	19.8245	13.6497	14.2996	17.2246	20.7995	15.2746	13.9747	22.4244	18.1995
1684	9.42476	19.4995	13.9747	14.2996	17.2246	20.7995	15.2746	13.9747	22.4244	18.5245
1685	9.74976	20.1495	13.9747	14.2996	17.5496	21.1245	15.2746	13.9747	22.4244	18.5245
1686	9.74976	19.8245	15.5996	14.2996	17.8746	20.7995	15.2746	13.9747	21.7745	18.8495
1687	9.42476	20.1495	14.9496	14.6246	17.5496	20.7995	15.2746	14.6246	22.0994	18.5245
1688	9.09977	19.8245	14.2996	14.2996	17.2246	20.7995	15.2746	14.6246	21.7745	17.8746
1689	9.42476	19.8245	14.6246	13.9747	17.5496	21.1245	15.2746	14.2996	21.4495	19.1745
1690	9.74976	20.1495	14.2996	14.6246	17.5496	21.1245	15.2746	14.6246	22.0994	18.1995
1691	9.42476	19.8245	14.2996	14.2996	17.5496	21.1245	15.2746	14.2996	22.0994	17.8746
1692	9.42476	19.8245	13.9747	14.6246	17.5496	21.1245	14.9496	14.2996	22.4244	17.8746
1693	9.42476	19.4995	15.5996	14.2996	17.8746	21.1245	15.2746	13.9747	21.7745	18.1995
1694	9.42476	19.4995	13.9747	14.6246	17.5496	21.1245	14.9496	14.6246	22.0994	18.5245
1695	9.42476	20.1495	14.6246	14.6246	17.8746	21.1245	14.9496	14.2996	22.0994	18.5245
1696	9.42476	19.8245	16.2496	14.6246	17.8746	21.1245	14.9496	14.6246	22.4244	17.2246
1697	9.42476	20.1495	15.5996	14.2996	17.5496	21.1245	15.2746	14.6246	22.4244	18.1995
1698	9.42476	19.8245	14.9496	14.2996	17.8746	20.7995	14.9496	13.9747	22.0994	18.1995
1699	9.74976	20.1495	15.5996	14.2996	17.2246	21.1245	15.2746	14.2996	22.0994	18.5245
1700	9.74976	20.1495	14.6246	14.2996	17.5496	21.1245	15.2746	14.2996	22.0994	18.1995
1701	9.74976	19.8245	14.2996	14.6246	17.8746	21.1245	15.2746	14.6246	22.0994	17.5496
1702	9.42476	20.1495	15.9246	14.2996	17.8746	21.1245	15.2746	14.2996	21.7745	18.8495
1703	9.42476	20.1495	14.2996	13.9747	17.5496	21.4495	14.9496	12.9997	22.0994	18.8495
1704	9.74976	19.8245	15.2746	14.2996	17.5496	21.1245	15.2746	13.6497	22.0994	18.5245
1705	9.42476	20.1495	14.6246	14.2996	17.8746	20.7995	15.2746	13.6497	21.7745	18.1995
1706	9.74976	20.1495	15.2746	14.6246	17.8746	21.1245	15.2746	13.6497	22.4244	17.8746
1707	9.42476	20.1495	13.6497	14.6246	17.8746	20.7995	14.9496	14.2996	22.0994	17.8746
1708	9.09977	20.1495	14.2996	14.2996	17.8746	21.1245	14.9496	14.6246	22.0994	17.8746
1709	9.42476	20.1495	13.9747	13.9747	17.5496	20.7995	15.2746	13.3247	22.0994	18.5245
1710	9.42476	20.1495	13.9747	14.2996	17.5496	20.7995	15.5996	13.9747	22.4244	17.8746
1711	9.74976	20.1495	14.9496	14.6246	17.8746	21.4495	15.2746	13.3247	21.7745	17.8746
1712	9.42476	20.1495	15.9246	13.9747	17.8746	21.4495	14.9496	13.6497	21.7745	18.1995
1713	9.42476	20.1495	15.9246	14.6246	17.8746	21.1245	14.6246	13.6497	22.0994	18.5245
1714	9.42476	20.1495	14.6246	13.9747	17.8746	21.4495	15.5996	13.3247	21.7745	18.5245
1715	9.74976	19.4995	15.2746	13.9747	17.8746	21.4495	14.9496	14.2996	22.0994	17.8746
1716	9.42476	20.1495	14.6246	14.6246	17.8746	21.4495	15.5996	12.6747	22.0994	18.1995
1717	9.42476	20.1495	15.2746	14.2996	17.8746	21.1245	14.9496	13.3247	21.7745	17.8746
1718	9.42476	19.8245	16.2496	13.9747	17.8746	21.4495	14.9496	14.2996	22.0994	18.1995
1719	9.42476	20.1495	14.9496	14.2996	17.8746	21.1245	14.6246	14.2996	21.7745	18.8495
1720	9.42476	20.1495	15.2746	14.2996	17.8746	21.1245	14.9496	14.9496	22.4244	17.2246
1721	9.42476	19.8245	14.6246	14.6246	17.8746	21.1245	15.5996	13.9747	22.0994	17.8746
1722	9.74976	20.1495	15.2746	13.9747	17.8746	21.1245	14.9496	14.2996	22.0994	18.1995
1723	9.42476	20.1495	15.9246	14.2996	17.8746	21.1245	15.5996	14.6246	22.4244	18.8495
1724	9.09977	20.1495	13.9747	14.2996	17.5496	21.1245	15.2746	14.2996	22.4244	17.8746
1725	9.42476	20.1495	13.6497	14.2996	17.8746	21.1245	15.2746	14.2996	22.4244	18.5245
1726	9.42476	19.8245	15.2746	14.6246	17.5496	21.1245	14.9496	14.6246	22.0994	17.8746
1727	9.09977	20.1495	14.9496	14.2996	17.5496	21.1245	15.2746	14.9496	21.7745	18.5245
1728	9.42476	20.1495	13.6497	14.2996	17.5496	21.1245	14.9496	14.2996	22.0994	18.5245
1729	9.42476	20.1495	14.6246	14.2996	17.5496	21.1245	15.2746	14.9496	22.0994	17.5496
1730	9.09977	19.8245	14.6246	14.6246	17.8746	21.1245	14.9496	14.6246	21.7745	17.8746
1731	9.42476	20.1495	15.2746	14.2996	17.8746	21.1245	14.9496	14.2996	21.7745	17.8746
1732	9.09977	20.1495	13.6497	14.2996	17.5496	21.1245	15.2746	14.6246	21.7745	17.8746
1733	9.42476	19.8245	14.2996	14.6246	17.5496	21.1245	14.9496	14.2996	22.0994	18.1995
1734	9.42476	20.1495	15.5996	14.6246	17.5496	21.1245	14.9496	14.9496	22.4244	17.8746
1735	9.42476	19.8245	15.2746	14.2996	17.5496	21.1245	15.2746	14.9496	21.7745	18.5245
1736	9.42476	19.8245	15.2746	14.9496	17.5496	21.1245	14.9496	13.6497	22.4244	18.5245
1737	9.42476	20.1495	14.9496	14.2996	17.5496	21.4495	15.2746	13.9747	21.7745	17.8746
1738	9.42476	19.8245	14.9496	14.6246	17.5496	21.4495	14.9496	14.2996	22.4244	17.5496
1739	9.42476	20.1495	15.5996	14.2996	17.5496	21.1245	15.2746	13.9747	22.0994	17.8746
1740	9.09977	19.8245	13.9747	14.6246	17.5496	21.1245	15.2746	14.2996	21.7745	18.1995
1741	9.42476	19.8245	15.2746	14.2996	17.5496	21.1245	14.9496	14.6246	22.4244	17.8746
1742	9.42476	19.8245	15.2746	14.6246	17.2246	21.4495	14.9496	14.2996	22.0994	18.5245
1743	9.09977	19.8245	16.2496	13.9747	17.2246	21.4495	15.2746	14.6246	22.4244	17.5496
1744	9.42476	20.1495	17.2246	14.2996	17.5496	21.4495	14.9496	14.2996	21.7745	17.5496
1745	9.09977	19.8245	16.8996	14.2996	17.2246	21.4495	15.2746	14.6246	21.7745	18.1995
1746	9.42476	19.8245	16.2496	14.2996	17.2246	21.4495	15.2746	14.6246	22.4244	18.5245
1747	9.42476	20.1495	15.5996	14.6246	17.5496	21.4495	14.9496	14.2996	22.4244	18.5245
1748	9.42476	19.4995	15.5996	14.2996	17.2246	21.1245	15.2746	14.6246	22.0994	18.8495
1749	9.09977	19.8245	15.2746	14.6246	17.5496	20.7995	14.9496	14.6246	22.4244	18.5245
1750	9.42476	19.8245	15.9246	14.6246	17.5496	20.7995	14.9496	15.2746	21.7745	18.1995
1751	9.09977	19.8245	16.2496	14.6246	17.5496	21.4495	14.9496	14.6246	22.0994	17.8746
1752	9.74976	19.8245	16.2496	14.6246	17.5496	21.4495	14.6246	14.6246	22.0994	18.1995
1753	9.42476	19.8245	15.2746	13.9747	17.5496	21.4495	15.5996	14.6246	22.0994	18.1995
1754	9.42476	19.8245	15.5996	14.2996	17.2246	21.4495	15.2746	13.9747	22.0994	18.5245
1755	9.42476	19.8245	16.5746	14.2996	17.8746	21.1245	15.2746	14.2996	21.7745	18.1995
1756	9.09977	19.8245	15.9246	14.2996	17.5496	21.1245	15.2746	14.6246	21.7745	18.5245
1757	9.42476	19.8245	16.5746	14.6246	17.2246	21.4495	15.2746	14.2996	22.0994	18.1995
1758	9.42476	19.8245	14.2996	14.2996	17.2246	21.1245	15.2746	14.6246	21.7745	18.5245
1759	9.42476	19.8245	13.9747	14.2996	17.2246	20.7995	15.2746	14.6246	21.7745	18.1995
1760	9.09977	19.8245	14.6246	14.2996	17.2246	21.1245	15.5996	14.6246	22.0994	17.5496
1761	9.42476	20.1495	14.6246	14.2996	17.5496	20.7995	14.2996	14.6246	21.7745	17.8746
1762	9.42476	19.8245	15.2746	14.6246	17.2246	20.7995	15.2746	14.6246	21.4495	18.1995
1763	9.42476	19.8245	14.2996	14.2996	17.5496	21.1245	14.9496	14.6246	22.0994	17.8746
1764	9.09977	19.8245	16.5746	14.2996	17.5496	21.4495	15.2746	14.6246	22.4244	17.8746
1765	9.42476	19.8245	15.2746	14.6246	17.2246	21.4495	15.2746	14.6246	21.7745	17.8746
1766	9.42476	19.4995	14.9496	14.6246	17.2246	21.4495	15.2746	14.6246	22.0994	18.1995
1767	9.09977	19.4995	16.8996	14.2996	17.2246	21.1245	14.9496	14.2996	22.0994	17.5496
1768	9.42476	19.4995	15.9246	14.6246	17.5496	21.1245	14.9496	14.6246	22.0994	18.5245
1769	9.42476	19.8245	16.2496	14.6246	17.5496	21.1245	15.2746	14.2996	21.7745	18.5245
1770	9.74976	19.8245	16.5746	14.6246	17.5496	21.1245	15.2746	14.6246	22.0994	17.2246
1771	9.09977	19.8245	17.2246	14.6246	17.5496	21.1245	15.2746	14.6246	22.4244	17.8746
1772	9.09977	19.8245	13.3247	14.2996	17.2246	21.1245	15.2746	14.2996	22.4244	18.1995
1773	9.42476	19.8245	16.2496	14.6246	17.2246	21.4495	14.6246	14.2996	22.4244	17.8746
1774	9.09977	19.4995	17.8746	14.6246	17.2246	21.1245	14.9496	14.6246	22.0994	18.1995
1775	9.42476	19.8245	17.2246	14.9496	17.2246	21.1245	14.9496	14.2996	22.0994	18.8495
1776	9.42476	20.1495	15.5996	13.9747	17.5496	21.4495	14.9496	14.6246	21.7745	18.5245
1777	9.09977	19.4995	14.9496	14.2996	17.5496	21.4495	15.2746	14.9496	22.4244	17.8746
1778	9.42476	19.8245	16.2496	14.2996	17.5496	21.1245	15.2746	14.2996	22.0994	18.1995
1779	9.42476	19.8245	17.2246	14.6246	17.2246	21.1245	14.6246	14.6246	22.0994	18.1995
1780	9.42476	19.4995	16.2496	14.2996	17.2246	21.1245	15.2746	14.2996	21.7745	18.5245
1781	9.42476	19.8245	15.9246	14.2996	16.8996	21.1245	14.9496	14.6246	21.7745	18.5245
1782	9.42476	19.4995	16.2496	14.2996	17.2246	21.1245	15.2746	14.2996	21.4495	18.1995
1783	9.42476	19.8245	16.5746	14.6246	16.8996	21.1245	14.9496	14.2996	21.4495	18.1995
1784	9.42476	19.8245	17.8746	14.6246	17.5496	21.1245	14.9496	14.2996	21.7745	18.5245
1785	9.42476	20.1495	15.5996	14.6246	16.8996	20.7995	14.9496	14.2996	22.0994	18.1995
1786	9.42476	19.8245	15.5996	14.6246	17.5496	20.7995	14.9496	14.6246	21.7745	18.1995
1787	9.42476	19.4995	16.2496	14.2996	17.5496	20.4745	15.2746	14.6246	21.7745	18.1995
1788	9.09977	19.8245	15.5996	14.6246	16.8996	20.4745	15.2746	14.2996	21.7745	18.1995
1789	9.42476	19.8245	17.8746	14.9496	16.8996	20.4745	15.2746	14.2996	22.0994	18.1995
1790	9.09977	19.8245	14.9496	14.9496	16.8996	20.4745	15.2746	14.6246	21.7745	18.1995
1791	9.42476	19.8245	16.8996	14.2996	16.8996	20.4745	14.9496	13.9747	21.7745	17.5496
1792	9.09977	19.8245	16.2496	14.6246	16.8996	20.4745	15.2746	14.2996	22.0994	17.8746
1793	8.77478	19.4995	16.2496	14.6246	16.5746	20.4745	14.9496	14.6246	22.0994	18.1995
1794	9.42476	19.8245	15.9246	14.6246	16.8996	20.4745	14.9496	14.6246	21.7745	17.5496
1795	9.42476	19.4995	16.2496	14.6246	16.8996	20.4745	14.9496	14.2996	22.0994	17.8746
1796	9.42476	19.8245	16.2496	14.6246	16.8996	20.4745	15.2746	13.9747	21.4495	18.5245
1797	9.74976	19.4995	14.6246	13.9747	16.8996	20.4745	15.2746	14.2996	21.7745	18.5245
1798	9.42476	19.8245	16.5746	13.9747	16.8996	20.4745	14.9496	14.6246	22.0994	18.1995
1799	9.42476	19.8245	14.9496	14.6246	16.8996	20.4745	15.2746	14.2996	22.0994	17.5496
	BGBV-195	BGBV-196	BGBV-197	BGBV-221	BGBV-222	BGBV-435	BGBV-443	BGBV-444	BGBV-445	BGBV-446
Pulse	10s;20hz;5ms	10s;20hz;5ms	10s;20hz;5ms	10s;20hz;5ms	10s;20hz;5ms	10s;20hz;5ms	10s;20hz;5ms	10s;20hz;5ms	10s;20hz;5ms	10s;20hz;5ms
LED	0.1	0.1	0.1	0.1	0.1	0.25	0.25	0.25	0.25	0.25
Layer	I	I	I	I	I	I	I	I	I	I
Max significant consecutive (ctrl)
Min (ctrl)	9.74976	19.8245	14.9496	11.6997	17.5496	19.8245	15.5996	14.2996	21.1245	17.8746
Max (ctrl)	10.0747	20.4745	17.2246	12.6747	17.8746	20.4745	16.5746	15.2746	22.7494	19.1745
Mean (ctrl)	10.0433	20.1495	16.302	12.2973	17.56	20.1495	16.0399	14.9077	21.9841	18.6923
sd (ctrl)	0.0976721	0.0839125	0.467934	0.291851	0.0583703	0.251738	0.24534	0.248102	0.341354	0.323591
1.960*sd	0.191437	0.164469	0.917151	0.572029	0.114406	0.493406	0.480867	0.48628	0.669053	0.634238
2.576*sd	0.251603	0.216159	1.2054	0.751809	0.150362	0.648476	0.631997	0.639111	0.879327	0.833571
t0 (Opto)	18	18	18	18	18	18	18	18	18	18
CV	0.00972511	0.0041645	0.0287041	0.023733	0.00332404	0.0124935	0.0152956	0.0166426	0.0155273	0.0173115
Magnitude (4 pt)
Onset (5 pt)
Magnitude (5 pt)
Onset (6 pt)
Magnitude (6 pt)
Initial contaction (4pt)
Initial contaction (5pt)
Initial contaction (6pt)
Dilation (4pt)
Max-dilatation	10.7247	20.7995	17.8746	14.9496	18.1995	21.4495	16.5746	15.2746	22.4244	19.1745
Max-contraction	8.77478	16.8996	12.0247	10.0747	14.2996	17.8746	13.6497	12.0247	18.8495	15.5996
t Max-contraction
AUC 0-2
AUC 2-4
AUC 4-6
AUC 6-8
AUC 8-10
Contraction K+
Age

## Sheet: HET0016
Stimulation
Time	BGBV-479_0001	BGBV-480_0001	BGBV-482_0001	BGBV-483_0001	BGBV-485_0001	BGBV-486_0001	BGBV-488_0001	BGBV-489_0001	BGBV-491_0001	BGBV-492_0001
0	18.5245	11.0497	15.9246	16.5746	23.0744	19.1745	24.0494	13.6497	14.2996	14.9496
1	18.1995	11.6997	15.2746	16.2496	23.0744	19.4995	24.3744	13.3247	13.9747	14.6246
2	18.8495	11.3747	15.9246	16.5746	23.0744	19.8245	23.7244	13.6497	14.2996	14.6246
3	18.1995	10.7247	15.9246	16.5746	23.0744	19.4995	24.3744	13.9747	13.9747	14.6246
4	18.1995	11.0497	15.2746	16.2496	23.0744	19.4995	24.6994	13.9747	14.2996	14.6246
5	18.1995	11.0497	15.9246	16.2496	23.0744	19.4995	24.0494	13.6497	13.6497	14.9496
6	18.1995	11.3747	15.9246	16.5746	22.7494	19.8245	24.3744	13.3247	14.2996	14.6246
7	18.1995	11.3747	15.9246	17.2246	23.3994	19.4995	24.0494	13.3247	13.9747	14.6246
8	18.5245	11.0497	15.2746	16.8996	23.0744	19.4995	24.0494	13.6497	14.2996	14.6246
9	18.1995	11.0497	15.9246	16.8996	23.0744	19.8245	24.0494	13.6497	13.9747	14.9496
10	18.1995	11.0497	15.5996	16.2496	23.0744	19.8245	24.3744	13.3247	14.2996	14.9496
11	18.1995	11.0497	15.2746	16.2496	23.0744	19.8245	23.7244	13.6497	13.9747	14.6246
12	18.1995	11.0497	15.5996	16.5746	22.7494	19.8245	23.3994	13.3247	14.2996	14.6246
13	18.1995	11.0497	15.9246	16.8996	23.3994	19.4995	24.3744	13.3247	14.2996	14.9496
14	18.1995	10.7247	15.5996	16.2496	23.0744	19.8245	24.0494	13.6497	13.9747	14.6246
15	18.5245	11.0497	15.5996	16.5746	23.0744	19.8245	24.0494	13.6497	14.2996	14.6246
16	18.5245	10.7247	15.5996	16.5746	23.0744	19.8245	23.7244	13.6497	13.9747	15.2746
17	18.1995	11.0497	15.5996	16.5746	23.0744	19.8245	23.7244	12.9997	14.2996	14.9496
18	18.1995	10.7247	15.9246	16.5746	23.3994	19.8245	24.0494	13.6497	14.2996	14.6246
19	18.1995	11.0497	15.9246	16.5746	23.0744	19.8245	24.0494	12.9997	13.6497	14.9496
20	18.1995	11.3747	15.2746	15.9246	23.0744	19.8245	24.3744	13.6497	13.9747	14.9496
21	18.1995	11.0497	15.5996	16.5746	23.3994	19.4995	24.0494	13.6497	13.9747	14.6246
22	18.1995	11.0497	15.2746	17.2246	23.3994	19.8245	23.7244	13.6497	14.2996	14.9496
23	18.1995	10.7247	15.5996	16.8996	23.0744	19.8245	24.0494	13.6497	13.6497	14.9496
24	18.1995	11.0497	15.5996	16.5746	23.0744	19.4995	24.3744	13.6497	14.2996	14.9496
25	18.8495	10.7247	15.5996	16.5746	23.0744	19.4995	24.0494	13.6497	13.6497	14.9496
26	18.1995	10.7247	15.2746	16.5746	22.7494	19.4995	23.7244	13.3247	14.2996	14.9496
27	18.1995	10.7247	15.9246	16.8996	23.3994	19.8245	23.7244	13.3247	13.6497	14.9496
28	18.1995	11.0497	15.5996	16.5746	22.7494	19.1745	24.6994	13.6497	14.2996	14.9496
29	18.1995	10.7247	15.9246	16.5746	23.0744	19.8245	24.3744	13.3247	13.6497	14.9496
30	18.5245	10.7247	15.5996	16.2496	23.0744	19.4995	24.0494	13.6497	13.9747	15.2746
31	18.5245	10.7247	15.5996	16.5746	23.0744	19.4995	24.0494	13.6497	14.2996	14.6246
32	18.5245	10.7247	15.2746	15.9246	23.3994	19.4995	24.0494	13.3247	13.9747	14.9496
33	18.5245	11.3747	15.2746	16.8996	23.3994	19.1745	24.0494	13.6497	13.9747	14.6246
34	18.1995	10.7247	15.5996	16.8996	23.0744	19.4995	24.0494	13.3247	13.9747	14.9496
35	18.5245	11.0497	15.5996	16.8996	23.0744	19.1745	24.0494	13.3247	14.2996	14.6246
36	18.5245	11.3747	15.5996	16.8996	23.0744	19.8245	24.0494	13.3247	13.9747	14.9496
37	18.5245	10.3997	15.9246	16.5746	22.7494	19.4995	24.0494	13.6497	13.9747	14.9496
38	18.5245	10.7247	15.5996	16.5746	23.0744	19.4995	24.0494	13.9747	13.9747	14.6246
39	18.1995	10.7247	15.2746	16.5746	23.0744	19.4995	24.3744	13.3247	13.9747	14.9496
40	18.5245	10.7247	15.9246	16.5746	22.7494	19.4995	24.0494	13.9747	14.2996	14.6246
41	18.1995	10.7247	15.5996	16.8996	23.3994	19.4995	24.0494	13.3247	13.9747	14.9496
42	18.5245	11.3747	15.2746	16.2496	23.3994	19.4995	24.0494	13.6497	13.9747	14.9496
43	18.1995	11.0497	15.9246	16.2496	23.0744	19.4995	23.7244	13.9747	13.6497	14.9496
44	18.8495	11.0497	15.9246	16.8996	23.0744	19.1745	24.0494	13.6497	14.2996	14.9496
45	18.5245	11.0497	15.2746	16.5746	23.3994	19.8245	24.0494	13.3247	13.9747	14.9496
46	18.5245	11.0497	15.2746	16.5746	23.0744	19.4995	24.0494	13.3247	13.9747	14.9496
47	18.1995	11.3747	15.2746	16.5746	23.0744	19.4995	24.0494	13.3247	13.9747	14.6246
48	18.5245	11.0497	15.9246	16.5746	23.0744	19.4995	24.0494	13.6497	13.9747	14.2996
49	18.1995	11.0497	15.2746	16.5746	22.7494	19.4995	23.7244	12.9997	13.9747	14.9496
50	18.5245	11.3747	15.5996	16.8996	23.0744	19.4995	24.0494	13.6497	14.2996	15.2746
51	18.1995	10.7247	15.2746	16.5746	22.7494	19.1745	24.0494	13.6497	13.9747	14.6246
52	18.5245	11.3747	15.5996	16.8996	22.7494	19.4995	23.7244	13.6497	13.9747	14.9496
53	18.5245	10.7247	15.5996	16.8996	23.0744	19.1745	23.7244	13.6497	13.9747	14.6246
54	18.1995	11.0497	15.5996	16.5746	22.7494	19.4995	23.7244	13.6497	13.9747	14.9496
55	18.5245	11.0497	15.5996	16.8996	22.7494	19.1745	24.3744	13.6497	13.9747	14.9496
56	18.1995	11.0497	15.5996	17.2246	23.3994	19.1745	23.7244	13.9747	14.2996	14.9496
57	18.1995	11.3747	15.5996	16.5746	22.7494	19.4995	24.0494	13.3247	13.6497	15.2746
58	18.5245	10.7247	15.2746	16.8996	22.7494	19.1745	24.0494	13.6497	13.9747	14.6246
59	18.5245	11.0497	15.2746	16.5746	22.7494	19.8245	23.7244	13.3247	13.6497	14.6246
60	17.8746	10.7247	15.5996	16.5746	22.4244	19.4995	24.0494	13.6497	14.2996	14.9496
61	18.5245	11.0497	15.5996	16.5746	22.7494	19.4995	23.3994	13.6497	14.2996	14.2996
62	18.1995	11.0497	15.2746	17.2246	22.7494	19.4995	23.7244	12.9997	14.2996	14.6246
63	18.8495	10.7247	15.2746	16.8996	22.4244	19.8245	23.7244	13.3247	14.2996	14.9496
64	18.1995	10.7247	15.5996	17.2246	22.4244	19.4995	24.0494	13.6497	13.9747	14.9496
65	18.5245	11.0497	15.2746	16.5746	22.4244	19.8245	24.0494	13.3247	13.9747	15.2746
66	18.1995	10.7247	15.5996	16.5746	22.7494	19.8245	24.0494	13.3247	13.9747	14.6246
67	18.1995	10.7247	15.5996	16.5746	22.4244	19.4995	23.7244	13.3247	13.6497	14.6246
68	18.1995	10.7247	15.5996	16.8996	22.4244	19.8245	24.0494	13.3247	14.2996	14.9496
69	18.1995	10.7247	15.2746	16.8996	22.0994	19.4995	23.3994	13.3247	13.9747	14.9496
70	18.5245	10.3997	15.5996	16.2496	21.7745	19.8245	23.7244	13.3247	13.9747	14.9496
71	18.5245	10.0747	15.5996	16.2496	21.7745	19.8245	24.0494	13.3247	13.6497	15.2746
72	18.1995	10.0747	15.2746	16.5746	22.0994	19.1745	24.3744	13.3247	13.9747	15.2746
73	18.5245	10.0747	15.9246	16.5746	21.4495	19.8245	23.3994	13.6497	14.2996	15.2746
74	18.5245	10.3997	15.5996	16.8996	21.4495	19.8245	24.0494	13.9747	14.2996	14.6246
75	18.1995	10.3997	15.5996	16.5746	21.7745	20.1495	23.7244	13.3247	13.9747	15.2746
76	18.1995	10.3997	15.5996	16.5746	21.4495	19.4995	24.0494	13.3247	13.9747	14.9496
77	18.1995	10.7247	15.5996	16.5746	21.1245	19.4995	23.3994	13.6497	13.6497	14.9496
78	18.5245	10.7247	15.2746	16.5746	21.4495	19.4995	23.7244	13.6497	13.3247	14.9496
79	18.5245	10.0747	15.2746	16.8996	21.1245	20.1495	24.3744	13.6497	13.9747	14.9496
80	18.1995	10.3997	15.2746	16.8996	21.1245	19.8245	23.7244	13.3247	13.6497	15.5996
81	18.1995	10.7247	15.5996	16.5746	21.1245	20.4745	24.3744	13.6497	13.9747	15.2746
82	18.5245	10.7247	15.2746	16.5746	21.1245	19.4995	23.7244	13.6497	13.6497	14.6246
83	18.5245	10.7247	15.9246	16.5746	21.1245	19.8245	23.7244	13.9747	13.6497	15.5996
84	18.1995	10.7247	15.9246	16.5746	21.1245	19.8245	24.0494	13.9747	13.3247	14.6246
85	18.5245	10.7247	15.2746	16.2496	20.7995	19.8245	23.7244	13.3247	13.3247	14.9496
86	18.1995	10.7247	15.5996	16.2496	20.7995	19.4995	24.0494	13.6497	13.9747	14.9496
87	18.1995	10.3997	15.5996	16.5746	21.1245	19.4995	24.3744	13.6497	13.3247	14.6246
88	18.1995	11.0497	15.5996	16.8996	20.7995	20.1495	23.7244	13.3247	13.3247	14.9496
89	18.1995	10.7247	16.2496	16.5746	20.7995	20.1495	23.7244	13.9747	13.6497	14.9496
90	18.1995	11.0497	15.5996	16.2496	20.7995	19.8245	24.0494	13.6497	13.6497	15.2746
91	18.1995	11.0497	15.9246	16.2496	21.1245	19.8245	24.0494	13.9747	13.3247	14.9496
92	18.1995	11.0497	15.5996	16.2496	21.1245	19.8245	23.7244	13.3247	13.3247	14.9496
93	18.1995	11.3747	15.5996	15.9246	20.7995	19.8245	24.0494	13.6497	13.3247	14.9496
94	18.5245	10.7247	15.2746	16.5746	21.1245	19.8245	24.0494	13.3247	12.9997	14.6246
95	18.1995	11.0497	15.5996	16.5746	20.7995	20.1495	23.7244	13.9747	13.3247	14.9496
96	18.1995	11.3747	15.5996	16.5746	20.4745	19.8245	23.7244	13.3247	13.3247	14.9496
97	18.1995	11.0497	15.5996	16.2496	20.1495	19.8245	23.3994	13.9747	13.3247	14.9496
98	18.1995	10.7247	15.2746	16.5746	21.1245	19.8245	23.3994	13.6497	12.9997	14.6246
99	18.5245	10.7247	15.9246	16.5746	20.7995	19.8245	23.3994	13.3247	12.9997	14.6246
100	18.5245	10.7247	16.2496	16.8996	20.7995	19.8245	23.7244	13.6497	12.9997	14.6246
101	18.1995	11.0497	15.2746	16.2496	20.4745	19.8245	23.3994	13.9747	12.6747	14.6246
102	18.5245	10.7247	15.5996	16.2496	20.4745	19.4995	23.3994	13.9747	13.3247	15.2746
103	18.5245	10.7247	15.2746	16.5746	20.1495	19.8245	24.0494	13.3247	13.3247	14.6246
104	18.1995	10.3997	15.2746	16.8996	20.1495	19.8245	24.0494	12.9997	13.6497	14.9496
105	18.1995	10.3997	15.5996	16.8996	20.1495	19.4995	23.3994	13.3247	12.9997	14.9496
106	18.5245	10.0747	15.2746	16.8996	20.4745	19.8245	24.0494	13.3247	13.3247	15.2746
107	18.5245	10.7247	15.5996	16.5746	20.4745	19.8245	23.7244	13.6497	12.9997	14.9496
108	18.1995	10.0747	15.5996	16.2496	20.4745	19.8245	24.0494	13.9747	12.9997	15.2746
109	18.1995	10.3997	15.9246	16.5746	20.1495	19.4995	23.7244	13.3247	12.9997	14.9496
110	18.1995	10.7247	15.5996	16.2496	20.4745	19.8245	24.0494	12.9997	12.6747	15.2746
111	17.8746	10.0747	15.2746	16.8996	20.1495	19.4995	24.0494	13.6497	12.9997	15.2746
112	18.1995	10.3997	15.2746	16.5746	20.4745	19.4995	23.7244	13.6497	12.9997	14.9496
113	17.8746	10.7247	15.5996	16.8996	20.4745	20.1495	23.7244	12.9997	13.3247	14.9496
114	18.5245	10.3997	15.5996	16.8996	20.4745	19.8245	24.0494	13.3247	12.9997	14.9496
115	18.1995	10.3997	15.5996	16.5746	20.4745	19.8245	24.3744	13.3247	13.3247	15.2746
116	17.8746	10.3997	15.9246	16.8996	20.1495	19.8245	24.0494	13.3247	12.9997	14.6246
117	18.1995	10.3997	15.2746	16.8996	20.4745	19.4995	23.3994	13.3247	12.9997	14.6246
118	18.1995	10.7247	15.2746	16.5746	20.4745	19.8245	23.3994	13.6497	12.9997	14.9496
119	18.1995	10.3997	15.2746	16.2496	20.7995	20.1495	23.3994	13.9747	12.9997	14.9496
120	17.8746	10.3997	15.2746	16.2496	20.4745	20.1495	23.7244	13.6497	12.6747	14.9496
121	18.1995	10.7247	14.9496	16.2496	20.4745	19.8245	23.7244	13.6497	12.3497	15.2746
122	17.8746	10.7247	15.5996	16.2496	20.4745	19.4995	23.7244	13.3247	12.9997	15.2746
123	18.1995	10.7247	15.5996	16.2496	20.1495	19.8245	24.0494	13.3247	12.9997	14.9496
124	17.8746	10.7247	15.5996	16.2496	20.4745	19.8245	23.3994	13.3247	12.9997	14.6246
125	18.1995	10.3997	15.2746	15.5996	20.7995	19.8245	23.0744	12.9997	13.3247	14.9496
126	18.1995	10.7247	15.5996	16.2496	20.7995	20.1495	23.7244	13.6497	12.9997	15.2746
127	18.1995	10.7247	14.9496	15.9246	20.4745	20.1495	23.7244	13.6497	12.9997	14.9496
128	18.1995	10.3997	15.9246	15.9246	20.4745	19.8245	24.3744	13.3247	12.9997	14.6246
129	18.1995	10.3997	14.9496	15.5996	20.4745	20.1495	23.7244	13.3247	12.9997	14.6246
130	18.5245	10.0747	14.9496	15.5996	20.4745	20.1495	23.7244	13.6497	12.9997	14.9496
131	18.8495	10.7247	15.5996	16.2496	20.4745	20.1495	23.3994	13.3247	12.9997	14.6246
132	18.1995	10.7247	14.9496	16.5746	20.4745	20.1495	24.0494	13.6497	12.9997	14.6246
133	18.1995	10.0747	14.6246	15.9246	20.1495	20.1495	23.7244	13.6497	12.9997	14.9496
134	18.1995	10.3997	14.9496	16.2496	20.1495	20.1495	23.7244	13.3247	12.6747	14.9496
135	18.1995	10.7247	14.6246	16.2496	20.4745	20.4745	23.3994	12.9997	12.9997	14.9496
136	18.5245	9.74976	15.9246	15.9246	20.4745	20.1495	23.7244	13.3247	12.6747	14.6246
137	18.1995	9.74976	15.2746	16.2496	20.7995	20.1495	23.3994	12.9997	12.9997	14.6246
138	18.1995	10.0747	15.5996	15.9246	20.4745	19.8245	23.7244	13.3247	12.9997	14.9496
139	17.8746	10.0747	15.2746	16.2496	20.1495	20.4745	23.7244	12.9997	12.9997	14.9496
140	18.5245	11.0497	15.5996	15.9246	20.4745	20.1495	23.3994	13.3247	12.9997	14.9496
141	18.1995	9.74976	14.9496	16.2496	20.4745	20.1495	24.0494	13.3247	12.9997	15.2746
142	17.8746	10.3997	14.6246	15.9246	20.1495	20.1495	23.3994	13.3247	12.6747	14.9496
143	18.1995	10.3997	13.9747	16.5746	20.7995	19.8245	24.0494	13.3247	13.3247	14.9496
144	18.5245	10.3997	14.6246	16.2496	20.4745	20.1495	23.7244	13.3247	12.3497	14.6246
145	18.5245	10.3997	14.9496	16.2496	20.4745	20.1495	23.3994	13.3247	12.3497	15.2746
146	18.1995	10.0747	14.6246	16.2496	20.4745	20.1495	23.3994	13.9747	12.3497	15.2746
147	18.8495	10.7247	14.6246	16.2496	21.1245	19.4995	23.7244	13.6497	12.9997	14.9496
148	18.1995	10.0747	14.9496	15.9246	20.7995	20.1495	24.0494	13.3247	12.9997	14.9496
149	18.1995	10.0747	15.2746	16.2496	20.4745	20.1495	23.3994	13.3247	12.9997	14.9496
150	18.1995	9.42476	14.2996	15.9246	20.4745	20.4745	23.7244	12.9997	12.6747	14.9496
151	18.1995	10.3997	14.6246	15.9246	20.7995	20.1495	24.0494	13.3247	12.9997	14.9496
152	17.8746	10.3997	15.2746	16.5746	20.4745	20.1495	24.0494	13.6497	12.9997	15.2746
153	18.5245	9.74976	14.9496	16.2496	20.4745	20.1495	25.0244	13.3247	12.9997	15.2746
154	18.1995	10.0747	14.9496	15.9246	20.4745	20.1495	23.3994	13.6497	12.6747	14.9496
155	17.8746	10.3997	14.9496	15.9246	20.4745	20.1495	23.3994	13.6497	12.9997	14.9496
156	18.5245	10.0747	14.2996	15.9246	20.4745	20.1495	23.7244	13.3247	12.9997	14.9496
157	18.1995	9.42476	13.3247	15.9246	20.4745	20.1495	24.3744	13.6497	12.9997	14.9496
158	17.8746	10.3997	14.9496	16.2496	20.4745	20.1495	24.0494	13.3247	12.9997	14.9496
159	18.5245	9.74976	15.2746	15.9246	20.7995	20.1495	24.3744	13.3247	12.9997	14.9496
160	18.5245	10.3997	14.9496	15.9246	20.4745	20.1495	24.3744	13.3247	12.9997	14.9496
161	18.8495	10.0747	14.2996	15.9246	20.7995	20.1495	24.0494	13.6497	12.3497	14.9496
162	18.1995	10.3997	15.2746	15.9246	20.7995	20.4745	24.0494	12.9997	12.9997	14.6246
163	18.1995	9.74976	14.9496	16.2496	21.1245	19.8245	24.0494	13.6497	12.6747	14.6246
164	18.1995	10.0747	14.9496	15.9246	21.1245	19.8245	23.7244	13.3247	12.9997	14.9496
165	18.5245	9.74976	14.9496	15.9246	21.1245	19.8245	23.7244	13.3247	12.6747	14.6246
166	18.5245	9.74976	14.6246	16.2496	20.7995	20.1495	24.0494	13.6497	12.3497	14.9496
167	18.1995	10.0747	14.2996	16.2496	21.1245	19.8245	24.0494	12.9997	12.3497	14.9496
168	18.8495	10.3997	14.2996	15.9246	20.7995	20.1495	24.0494	13.6497	12.3497	15.2746
169	18.5245	10.0747	14.2996	15.9246	21.4495	20.1495	24.3744	13.3247	12.9997	14.9496
170	18.1995	9.74976	14.6246	15.9246	20.7995	19.8245	24.3744	13.9747	12.9997	14.9496
171	18.1995	10.0747	14.2996	15.9246	21.1245	20.1495	24.6994	12.9997	12.3497	14.9496
172	18.5245	9.42476	13.9747	16.2496	20.7995	20.1495	25.0244	13.6497	12.6747	15.2746
173	18.5245	10.0747	14.9496	16.2496	20.7995	19.8245	23.7244	13.3247	12.6747	14.9496
174	18.1995	10.7247	14.6246	16.2496	21.1245	20.1495	23.3994	13.3247	12.6747	15.2746
175	18.5245	10.0747	13.9747	15.9246	21.1245	20.1495	24.6994	13.3247	12.6747	14.9496
176	18.1995	9.74976	14.9496	15.9246	21.1245	20.1495	24.0494	13.3247	12.3497	15.2746
177	18.5245	10.3997	14.6246	15.9246	21.1245	20.1495	24.0494	13.6497	12.3497	14.9496
178	17.8746	10.0747	14.6246	15.5996	21.1245	20.1495	24.0494	13.9747	12.6747	14.9496
179	18.1995	10.3997	14.6246	15.9246	20.7995	20.1495	24.0494	13.3247	12.6747	14.9496
180	18.5245	9.42476	14.9496	15.9246	20.7995	20.1495	23.7244	13.6497	12.3497	15.2746
181	18.8495	10.0747	14.6246	15.9246	21.1245	20.1495	24.3744	13.6497	12.3497	15.2746
182	18.1995	10.0747	14.6246	15.9246	20.7995	20.1495	24.3744	13.9747	12.6747	14.9496
183	18.5245	9.09977	14.9496	15.9246	21.1245	19.8245	24.0494	13.6497	12.3497	15.2746
184	18.1995	9.42476	14.6246	15.9246	20.7995	20.1495	24.3744	13.3247	12.9997	15.2746
185	18.5245	9.74976	14.9496	15.9246	21.1245	20.1495	24.0494	13.6497	12.6747	15.5996
186	18.5245	9.74976	14.6246	15.9246	21.4495	20.1495	23.7244	13.3247	12.6747	15.2746
187	18.8495	9.74976	13.9747	16.5746	21.4495	20.1495	24.0494	13.6497	12.3497	15.2746
188	18.5245	10.0747	14.2996	16.5746	20.7995	20.1495	23.7244	13.6497	12.3497	15.2746
189	18.5245	9.09977	14.2996	15.9246	21.1245	20.1495	24.0494	13.6497	12.3497	14.9496
190	18.8495	9.74976	13.9747	16.2496	20.7995	20.1495	24.6994	13.6497	12.6747	14.9496
191	18.5245	9.42476	14.6246	15.9246	21.4495	19.8245	23.7244	13.9747	12.6747	15.2746
192	18.5245	10.0747	14.9496	15.5996	21.4495	20.1495	24.0494	13.3247	12.3497	15.2746
193	18.1995	9.74976	14.9496	15.9246	20.7995	20.1495	24.0494	13.6497	12.6747	15.5996
194	18.5245	9.74976	14.9496	15.9246	21.4495	20.1495	23.7244	13.9747	12.3497	14.9496
195	18.5245	9.74976	14.6246	15.9246	21.1245	19.8245	23.7244	13.6497	12.9997	15.2746
196	18.1995	9.09977	14.6246	15.9246	21.4495	20.1495	24.0494	14.2996	12.6747	14.9496
197	18.5245	9.42476	14.6246	15.5996	21.4495	20.1495	23.7244	13.9747	12.6747	14.9496
198	18.5245	9.42476	14.6246	16.2496	21.7745	19.8245	24.0494	13.9747	12.6747	14.9496
199	18.5245	9.42476	14.6246	15.5996	21.4495	20.1495	24.0494	13.6497	12.6747	14.9496
200	18.5245	9.42476	14.6246	15.9246	21.1245	20.1495	24.3744	13.6497	12.9997	14.9496
201	18.5245	9.42476	14.6246	15.9246	21.4495	20.1495	23.7244	13.6497	12.9997	14.6246
202	18.8495	9.42476	14.6246	15.9246	21.1245	20.1495	24.3744	13.6497	12.9997	14.6246
203	18.5245	10.0747	14.9496	15.9246	21.4495	20.1495	24.3744	13.3247	12.6747	15.2746
204	18.1995	9.74976	14.9496	15.9246	21.1245	20.1495	24.0494	13.9747	12.9997	14.9496
205	18.1995	9.74976	14.6246	15.9246	21.4495	20.1495	24.6994	13.6497	12.3497	14.6246
206	18.1995	9.42476	14.9496	15.9246	21.4495	20.1495	24.6994	13.6497	12.6747	14.9496
207	18.5245	9.74976	14.6246	15.9246	21.7745	20.1495	24.0494	13.6497	12.9997	14.9496
208	18.1995	9.42476	14.6246	15.9246	22.0994	20.1495	23.7244	13.6497	12.9997	15.2746
209	18.1995	9.74976	13.9747	16.2496	21.4495	20.1495	23.7244	13.6497	12.9997	14.9496
210	18.5245	10.0747	14.2996	15.9246	21.4495	20.1495	24.0494	13.6497	12.9997	14.9496
211	18.5245	9.74976	13.6497	15.9246	21.7745	19.8245	24.0494	13.3247	12.9997	14.9496
212	18.1995	10.0747	14.6246	16.2496	21.4495	20.1495	23.7244	12.9997	12.9997	15.2746
213	18.1995	9.74976	13.9747	15.9246	21.7745	19.8245	24.3744	13.9747	12.6747	14.9496
214	18.5245	10.0747	14.6246	16.2496	21.1245	20.1495	24.0494	13.3247	12.6747	15.2746
215	18.1995	10.0747	14.2996	16.2496	21.1245	20.1495	23.3994	13.9747	12.6747	14.9496
216	18.5245	9.74976	14.6246	16.2496	21.4495	19.8245	23.7244	13.6497	12.9997	15.2746
217	18.1995	10.0747	14.2996	16.2496	21.4495	20.1495	24.0494	13.9747	12.9997	14.9496
218	18.1995	10.0747	13.6497	16.2496	21.4495	20.1495	24.3744	13.3247	12.9997	15.2746
219	17.8746	10.0747	13.6497	16.2496	21.4495	19.8245	24.6994	13.9747	12.9997	14.9496
220	18.1995	9.74976	14.2996	16.2496	21.4495	19.8245	24.0494	13.6497	12.9997	14.9496
221	18.1995	9.74976	14.2996	16.5746	21.7745	19.8245	24.3744	13.9747	12.9997	14.9496
222	18.5245	9.74976	14.6246	16.8996	22.0994	19.8245	24.0494	14.2996	12.9997	15.2746
223	18.5245	9.42476	14.2996	16.5746	21.4495	20.1495	24.3744	13.9747	12.9997	15.2746
224	18.1995	9.42476	14.2996	16.2496	21.4495	20.1495	24.0494	13.3247	12.9997	15.2746
225	18.5245	9.74976	13.3247	16.2496	21.7745	20.1495	24.3744	13.6497	12.9997	15.2746
226	18.1995	9.74976	14.6246	16.2496	21.7745	20.1495	23.7244	13.6497	12.9997	15.2746
227	18.5245	10.0747	13.9747	16.2496	21.7745	19.8245	24.0494	13.9747	12.9997	15.2746
228	18.1995	10.0747	13.6497	16.2496	21.4495	20.1495	24.0494	13.6497	12.9997	15.5996
229	17.8746	9.42476	13.9747	16.5746	21.4495	19.8245	24.0494	13.6497	12.6747	15.2746
230	18.1995	9.42476	14.9496	16.2496	21.7745	19.8245	24.3744	13.6497	12.9997	15.2746
231	18.1995	10.0747	13.6497	16.8996	21.7745	20.1495	23.7244	13.9747	12.6747	15.2746
232	18.5245	10.0747	14.9496	16.5746	21.7745	19.8245	24.0494	13.9747	12.9997	15.2746
233	18.1995	9.74976	14.6246	16.5746	21.4495	20.1495	23.3994	13.9747	12.9997	15.2746
234	18.1995	9.74976	14.6246	16.5746	21.7745	19.4995	24.3744	13.6497	12.9997	15.2746
235	18.1995	9.42476	14.2996	16.2496	21.4495	19.8245	24.6994	13.6497	12.6747	15.2746
236	18.5245	9.42476	14.2996	16.5746	22.0994	19.8245	24.0494	13.9747	12.9997	15.2746
237	18.1995	9.74976	14.2996	16.8996	21.7745	20.1495	24.0494	13.3247	12.9997	14.9496
238	18.5245	9.42476	13.9747	16.5746	21.7745	19.8245	24.3744	13.9747	13.3247	15.2746
239	18.1995	9.74976	14.2996	16.2496	21.4495	19.8245	23.3994	13.6497	12.9997	15.5996
240	18.1995	9.09977	14.6246	16.5746	21.4495	19.8245	25.0244	13.9747	12.6747	15.2746
241	18.1995	9.74976	14.6246	16.2496	21.7745	20.1495	24.0494	13.9747	12.9997	14.9496
242	18.1995	9.74976	14.2996	16.5746	21.4495	19.8245	24.0494	13.6497	12.9997	15.2746
243	18.1995	9.74976	14.2996	16.5746	21.4495	19.8245	24.3744	13.3247	12.9997	15.5996
244	18.1995	9.74976	14.2996	16.2496	21.4495	19.8245	24.3744	13.3247	12.9997	15.5996
245	18.1995	9.74976	13.3247	16.5746	21.4495	19.8245	24.6994	13.9747	12.9997	15.5996
246	18.1995	9.74976	13.9747	16.2496	21.7745	20.1495	23.3994	13.9747	12.9997	15.2746
247	18.1995	9.74976	13.6497	16.2496	21.4495	19.8245	24.0494	13.3247	13.3247	14.9496
248	17.8746	9.74976	13.6497	16.5746	21.7745	20.1495	24.3744	13.9747	12.9997	15.5996
249	18.1995	9.74976	13.9747	16.5746	21.7745	19.4995	24.0494	13.9747	12.6747	14.9496
250	18.5245	9.42476	13.9747	16.2496	21.1245	19.8245	23.3994	13.6497	13.3247	15.2746
251	18.1995	9.42476	13.3247	16.8996	21.4495	19.8245	24.6994	13.3247	12.6747	14.9496
252	18.1995	9.42476	12.9997	16.5746	21.7745	19.8245	23.3994	13.3247	12.6747	15.5996
253	17.8746	9.42476	14.2996	16.5746	21.4495	20.1495	24.0494	13.3247	12.6747	15.2746
254	18.1995	9.74976	13.3247	16.8996	22.0994	19.4995	24.0494	13.3247	12.6747	15.2746
255	18.1995	9.42476	13.3247	16.2496	21.4495	19.8245	24.0494	13.6497	12.9997	15.2746
256	17.8746	9.42476	14.2996	16.5746	21.4495	19.8245	23.7244	13.9747	12.6747	15.2746
257	18.5245	9.42476	14.2996	16.2496	21.4495	19.8245	24.3744	13.9747	12.9997	15.2746
258	18.1995	9.74976	14.2996	16.2496	21.7745	19.8245	23.7244	13.6497	12.6747	15.2746
259	18.1995	9.42476	14.6246	16.5746	21.7745	19.8245	23.7244	13.6497	12.9997	15.2746
260	18.5245	9.42476	13.9747	16.8996	21.4495	19.8245	24.0494	13.9747	12.6747	15.2746
261	18.1995	9.74976	14.6246	16.5746	22.0994	19.8245	24.0494	13.6497	12.6747	15.5996
262	18.1995	9.74976	14.2996	15.9246	21.7745	19.8245	24.0494	13.3247	12.9997	15.2746
263	18.5245	9.42476	13.9747	16.2496	21.7745	19.8245	23.7244	13.3247	12.6747	15.5996
264	18.1995	9.74976	14.2996	16.5746	22.0994	20.1495	24.3744	14.2996	12.9997	15.2746
265	18.1995	9.74976	13.6497	16.2496	21.7745	19.4995	23.3994	13.3247	12.9997	15.5996
266	18.1995	9.42476	13.6497	16.5746	21.7745	19.8245	23.7244	13.9747	12.6747	15.5996
267	18.1995	9.42476	13.6497	16.5746	21.7745	19.8245	24.3744	13.3247	12.6747	15.2746
268	18.1995	9.74976	13.6497	16.2496	22.0994	19.4995	24.0494	13.3247	12.9997	15.2746
269	18.5245	9.74976	14.2996	16.5746	21.7745	19.4995	23.7244	13.9747	12.9997	15.5996
270	18.1995	9.74976	14.6246	16.5746	21.7745	19.8245	24.6994	13.9747	13.3247	15.5996
271	18.1995	9.74976	13.9747	16.5746	21.7745	19.4995	23.7244	13.6497	12.9997	15.2746
272	18.1995	10.0747	14.9496	16.5746	22.0994	19.8245	24.0494	13.6497	12.9997	14.9496
273	17.8746	9.74976	13.6497	16.8996	21.7745	19.8245	24.6994	13.6497	13.3247	15.5996
274	17.8746	10.0747	14.2996	16.5746	21.7745	19.4995	24.6994	13.6497	12.6747	15.9246
275	18.1995	9.74976	14.2996	16.2496	21.4495	19.8245	23.7244	13.6497	12.9997	15.5996
276	18.1995	9.42476	14.2996	16.5746	21.4495	19.8245	24.0494	13.9747	12.6747	15.5996
277	18.1995	9.74976	13.6497	16.5746	21.1245	19.8245	24.3744	13.6497	12.9997	15.2746
278	17.8746	9.42476	14.9496	16.5746	21.7745	19.8245	24.6994	13.9747	12.6747	15.5996
279	18.5245	10.0747	14.6246	16.5746	21.4495	19.8245	23.7244	14.2996	12.6747	15.2746
280	17.8746	9.42476	14.6246	16.8996	21.4495	20.1495	24.0494	13.9747	12.9997	15.5996
281	18.1995	9.42476	13.9747	16.5746	21.7745	20.1495	24.3744	13.6497	12.9997	15.2746
282	18.5245	9.74976	14.6246	16.2496	21.7745	19.8245	24.0494	13.6497	13.3247	14.9496
283	18.5245	9.42476	14.9496	16.5746	22.0994	20.1495	24.0494	13.9747	12.9997	15.2746
284	18.1995	10.0747	14.2996	16.5746	21.7745	19.8245	24.0494	13.6497	12.9997	15.2746
285	18.1995	10.0747	14.6246	16.5746	21.7745	19.4995	24.6994	13.6497	12.6747	15.2746
286	18.5245	9.42476	14.2996	16.5746	21.7745	19.8245	24.3744	13.6497	12.9997	14.9496
287	18.5245	9.74976	14.9496	16.5746	22.0994	19.4995	23.7244	13.6497	12.3497	15.2746
288	18.5245	9.42476	14.2996	16.2496	21.7745	20.1495	24.3744	13.9747	12.9997	15.2746
289	18.1995	10.3997	14.9496	16.2496	21.7745	19.8245	24.3744	13.6497	12.9997	15.2746
290	18.1995	9.42476	14.2996	16.2496	22.0994	19.8245	24.0494	13.6497	12.9997	15.2746
291	18.1995	10.0747	14.2996	16.2496	21.7745	19.8245	24.0494	13.6497	12.9997	14.9496
292	17.8746	9.42476	14.2996	15.9246	21.7745	19.8245	23.7244	13.3247	13.3247	15.2746
293	18.1995	9.42476	14.2996	16.5746	22.0994	19.4995	24.0494	13.6497	12.6747	15.2746
294	18.5245	9.74976	14.2996	16.2496	21.7745	19.8245	24.0494	13.9747	12.6747	15.2746
295	17.8746	9.74976	13.9747	16.2496	21.7745	19.8245	24.3744	13.6497	12.6747	15.2746
296	18.5245	9.74976	14.2996	16.2496	22.0994	19.4995	24.6994	13.9747	12.6747	15.2746
297	18.1995	8.77478	13.9747	16.5746	22.0994	19.8245	24.6994	13.9747	12.6747	14.9496
298	18.5245	9.42476	14.2996	16.5746	22.7494	19.8245	24.0494	13.9747	12.6747	15.2746
299	18.1995	10.0747	14.2996	16.5746	21.7745	19.8245	24.0494	13.9747	12.6747	15.2746
300	17.8746	9.42476	14.6246	16.2496	21.7745	19.8245	24.3744	13.9747	12.9997	15.5996
301	18.1995	9.42476	14.6246	16.5746	22.0994	19.4995	23.3994	13.9747	12.6747	15.2746
302	18.1995	9.42476	14.6246	16.2496	22.0994	19.8245	24.3744	13.9747	13.3247	15.5996
303	17.8746	9.74976	14.2996	16.5746	21.4495	19.4995	24.3744	13.6497	12.6747	15.5996
304	18.5245	9.74976	14.2996	15.9246	22.0994	19.4995	24.3744	13.3247	12.9997	15.5996
305	18.5245	9.74976	14.6246	16.2496	22.0994	19.4995	24.0494	14.2996	12.9997	15.2746
306	18.1995	9.42476	15.2746	16.2496	21.7745	19.4995	24.3744	13.6497	12.6747	15.2746
307	18.5245	9.09977	14.9496	16.2496	22.0994	19.8245	24.6994	13.6497	12.3497	15.2746
308	18.5245	9.42476	14.2996	16.2496	21.7745	19.4995	24.3744	13.3247	12.6747	14.9496
309	18.1995	9.42476	14.9496	16.5746	22.0994	19.4995	23.7244	13.6497	12.6747	14.9496
310	18.1995	9.42476	14.9496	16.5746	22.0994	19.4995	24.3744	13.6497	12.9997	14.9496
311	18.1995	9.09977	14.2996	16.5746	22.0994	19.8245	24.6994	13.9747	12.9997	14.9496
312	18.1995	9.74976	14.6246	16.5746	22.0994	19.4995	24.0494	13.6497	12.9997	15.2746
313	18.1995	9.42476	14.2996	16.5746	22.0994	19.8245	24.6994	13.3247	12.6747	15.5996
314	18.5245	9.42476	14.9496	16.2496	22.0994	20.1495	23.7244	13.6497	12.6747	15.2746
315	18.5245	9.74976	14.9496	16.8996	22.4244	19.8245	24.0494	13.6497	12.6747	15.2746
316	18.1995	9.09977	14.6246	16.5746	22.0994	19.8245	23.7244	13.3247	12.9997	14.9496
317	18.1995	9.09977	14.9496	16.5746	21.7745	19.4995	24.3744	13.9747	13.3247	15.2746
318	18.5245	9.74976	14.9496	16.2496	22.0994	19.4995	24.0494	13.9747	13.3247	15.5996
319	18.5245	9.74976	14.2996	16.8996	22.4244	19.4995	24.3744	13.9747	12.6747	15.2746
320	18.5245	10.0747	14.2996	16.5746	22.0994	19.8245	24.0494	13.6497	12.9997	14.9496
321	18.5245	10.0747	14.6246	16.5746	22.4244	19.8245	24.0494	13.9747	12.9997	14.9496
322	18.8495	9.74976	14.6246	16.2496	22.0994	19.8245	23.7244	13.6497	12.9997	15.2746
323	18.5245	9.74976	15.2746	15.9246	21.7745	19.8245	24.0494	13.9747	12.9997	15.2746
324	18.5245	9.74976	14.6246	16.5746	22.0994	19.4995	24.0494	13.6497	12.6747	15.5996
325	18.1995	10.0747	14.9496	16.2496	22.4244	19.8245	23.7244	13.9747	12.6747	15.2746
326	18.1995	9.74976	14.6246	16.8996	22.0994	19.4995	23.3994	13.6497	12.6747	15.2746
327	18.5245	10.3997	13.9747	16.2496	21.7745	19.8245	24.3744	13.9747	12.9997	15.2746
328	18.1995	9.74976	14.2996	16.2496	22.0994	19.8245	24.0494	13.6497	12.6747	15.2746
329	18.1995	9.74976	14.9496	16.5746	22.4244	19.4995	24.3744	14.6246	12.9997	15.2746
330	18.8495	10.0747	14.6246	16.8996	22.0994	19.8245	24.3744	13.6497	12.9997	15.2746
331	18.5245	10.3997	14.2996	16.5746	22.0994	19.4995	25.0244	13.9747	12.9997	15.2746
332	18.1995	10.0747	14.2996	16.5746	22.0994	19.4995	24.0494	14.2996	12.6747	15.2746
333	18.5245	10.0747	14.6246	16.2496	22.0994	19.8245	24.0494	13.6497	12.6747	15.2746
334	17.8746	9.74976	14.9496	16.2496	22.4244	19.8245	24.0494	13.9747	12.6747	15.2746
335	18.1995	9.42476	13.9747	16.2496	22.0994	19.8245	24.3744	13.9747	13.3247	15.2746
336	18.5245	10.0747	14.2996	16.2496	22.0994	19.8245	23.7244	13.3247	12.9997	15.5996
337	18.1995	9.09977	14.2996	16.5746	22.4244	20.1495	24.0494	13.9747	12.9997	15.2746
338	18.5245	9.42476	14.6246	16.2496	21.7745	19.8245	24.3744	13.3247	12.3497	15.5996
339	18.5245	10.0747	14.6246	16.5746	22.0994	19.8245	24.0494	13.6497	12.9997	15.2746
340	18.5245	9.74976	14.6246	16.8996	22.0994	19.8245	24.6994	13.3247	12.6747	15.2746
341	18.5245	9.74976	14.9496	16.5746	22.0994	19.8245	24.6994	13.3247	12.9997	15.2746
342	18.5245	9.74976	14.6246	16.2496	22.0994	19.8245	23.7244	13.6497	12.9997	15.2746
343	18.5245	9.74976	14.9496	16.5746	22.0994	19.8245	24.0494	13.6497	12.6747	15.5996
344	18.8495	10.0747	14.2996	16.5746	22.4244	19.4995	23.7244	13.6497	12.3497	15.2746
345	18.1995	9.42476	14.6246	16.5746	22.4244	19.8245	24.6994	13.9747	12.9997	15.2746
346	18.1995	9.74976	14.9496	16.2496	22.0994	19.8245	24.6994	14.2996	12.6747	15.2746
347	18.1995	9.42476	14.2996	16.2496	22.0994	19.8245	25.0244	14.2996	12.6747	15.2746
348	18.1995	10.0747	14.6246	16.8996	22.4244	19.8245	24.6994	13.6497	12.9997	15.2746
349	18.5245	9.74976	14.9496	16.2496	22.0994	19.4995	25.3494	13.6497	12.9997	15.2746
350	18.5245	10.0747	14.6246	16.5746	22.0994	19.8245	24.0494	13.6497	12.6747	14.9496
351	18.1995	9.74976	14.6246	16.5746	22.0994	19.8245	24.0494	13.6497	12.9997	15.2746
352	18.5245	9.74976	14.6246	15.9246	22.0994	19.4995	25.0244	13.9747	12.9997	15.2746
353	18.1995	10.0747	14.2996	16.5746	22.0994	19.8245	24.6994	14.2996	13.3247	15.2746
354	17.8746	9.74976	15.2746	16.5746	22.4244	19.8245	24.3744	12.9997	12.9997	15.2746
355	18.5245	9.74976	13.9747	16.5746	22.0994	19.4995	24.0494	13.6497	12.9997	15.2746
356	18.5245	10.0747	14.2996	16.8996	21.7745	19.8245	24.3744	13.6497	12.9997	15.2746
357	18.5245	10.3997	14.6246	16.5746	22.4244	19.4995	23.7244	13.6497	12.9997	15.2746
358	18.5245	10.0747	14.2996	16.5746	22.0994	19.8245	23.7244	13.6497	12.9997	15.2746
359	18.1995	10.7247	14.2996	16.5746	22.0994	19.4995	24.0494	13.3247	12.9997	15.2746
360	17.8746	10.0747	14.6246	16.5746	21.7745	19.8245	24.0494	13.3247	13.3247	15.2746
361	18.5245	10.0747	14.2996	16.5746	21.7745	19.4995	24.3744	13.9747	13.3247	15.2746
362	17.8746	10.0747	15.5996	16.5746	22.0994	19.8245	24.3744	13.6497	12.9997	15.2746
363	18.1995	9.74976	14.9496	16.5746	22.0994	19.8245	24.0494	14.2996	12.9997	15.2746
364	18.1995	10.0747	14.9496	16.5746	22.4244	19.8245	24.0494	13.3247	12.9997	14.9496
365	18.5245	10.0747	14.9496	16.8996	22.0994	19.8245	24.3744	13.6497	12.6747	14.9496
366	18.1995	10.0747	15.2746	16.8996	22.0994	19.8245	24.3744	13.6497	12.6747	15.2746
367	18.5245	9.74976	14.9496	16.5746	22.0994	19.8245	24.0494	13.3247	12.6747	15.2746
368	18.1995	9.74976	14.6246	16.8996	22.0994	19.4995	24.3744	13.6497	12.9997	15.2746
369	18.1995	10.3997	14.6246	16.8996	22.0994	19.8245	24.6994	13.9747	12.6747	14.9496
370	18.1995	10.0747	13.9747	16.5746	21.7745	19.4995	24.0494	13.6497	12.9997	15.2746
371	18.5245	10.0747	14.6246	16.5746	22.0994	19.8245	24.0494	13.9747	12.9997	15.2746
372	18.5245	10.0747	14.9496	16.8996	22.4244	19.4995	24.3744	13.3247	12.9997	15.2746
373	18.1995	9.74976	14.6246	16.8996	22.0994	19.4995	24.3744	13.3247	12.9997	14.9496
374	18.1995	10.0747	14.6246	16.8996	22.4244	19.4995	23.7244	13.6497	12.9997	15.2746
375	18.1995	9.74976	14.9496	16.2496	22.0994	19.8245	24.0494	13.3247	12.9997	14.9496
376	18.1995	9.42476	14.2996	16.5746	21.7745	19.8245	24.3744	13.6497	12.6747	14.9496
377	18.1995	9.74976	13.9747	16.5746	22.0994	19.4995	24.3744	13.3247	13.3247	15.2746
378	18.1995	9.74976	14.9496	16.5746	21.7745	19.4995	24.3744	13.9747	12.9997	15.2746
379	18.1995	10.0747	15.2746	16.2496	22.0994	19.8245	24.3744	13.3247	12.9997	15.2746
380	18.5245	10.0747	14.9496	16.2496	22.0994	19.8245	24.0494	12.9997	13.3247	14.9496
381	18.1995	9.74976	15.2746	16.8996	22.0994	19.4995	24.3744	13.6497	13.3247	14.6246
382	18.5245	10.3997	14.6246	17.2246	22.0994	19.8245	24.3744	13.3247	12.9997	14.9496
383	18.1995	10.0747	14.9496	16.5746	22.0994	19.4995	24.6994	13.6497	12.9997	14.9496
384	18.1995	10.0747	14.6246	16.2496	21.7745	19.8245	24.3744	13.6497	13.3247	14.9496
385	18.1995	10.0747	14.9496	16.5746	22.4244	19.8245	24.0494	13.9747	13.3247	14.9496
386	18.5245	9.74976	14.6246	16.2496	22.0994	19.4995	24.3744	13.3247	12.9997	15.5996
387	17.8746	10.0747	14.6246	16.5746	21.7745	19.8245	24.3744	13.9747	13.3247	15.2746
388	18.1995	10.0747	15.5996	16.5746	22.0994	19.8245	24.6994	13.6497	12.9997	15.2746
389	18.1995	9.74976	14.6246	16.5746	22.0994	19.8245	23.7244	13.3247	13.3247	14.9496
390	17.8746	9.74976	14.9496	16.2496	22.0994	19.8245	24.0494	13.6497	12.9997	15.2746
391	18.1995	10.0747	14.6246	16.8996	22.4244	19.8245	24.0494	13.6497	13.3247	15.2746
392	18.5245	10.0747	14.6246	16.8996	22.0994	19.8245	24.6994	13.6497	13.3247	15.2746
393	17.8746	9.74976	14.6246	16.2496	22.0994	19.8245	23.7244	13.3247	13.3247	15.5996
394	17.8746	9.09977	13.3247	16.2496	22.4244	19.8245	23.7244	13.9747	13.3247	15.2746
395	17.8746	9.42476	13.9747	16.5746	22.0994	19.4995	24.3744	13.3247	13.3247	15.5996
396	18.5245	10.3997	13.9747	16.2496	22.0994	19.8245	24.6994	13.6497	12.9997	15.2746
397	17.8746	10.0747	14.9496	16.2496	21.7745	19.8245	24.6994	13.9747	13.3247	14.6246
398	18.1995	9.42476	15.2746	16.5746	21.7745	19.8245	24.3744	13.6497	12.3497	15.2746
399	18.1995	10.0747	14.6246	16.5746	21.7745	20.1495	24.0494	13.6497	12.9997	15.5996
400	18.1995	10.0747	14.6246	16.8996	21.7745	20.1495	24.0494	14.2996	12.9997	15.2746
401	17.8746	9.74976	13.9747	16.2496	21.7745	19.8245	24.3744	13.3247	12.6747	15.2746
402	18.1995	9.74976	14.6246	16.5746	21.7745	19.8245	24.0494	13.9747	13.3247	15.2746
403	17.8746	9.42476	14.6246	16.2496	22.0994	19.4995	24.3744	13.6497	12.9997	15.5996
404	18.1995	9.42476	14.6246	16.2496	22.0994	19.8245	24.3744	13.9747	13.6497	15.2746
405	18.1995	10.3997	14.6246	16.5746	22.0994	19.8245	24.0494	13.3247	12.3497	15.5996
406	17.8746	9.74976	14.6246	15.9246	22.0994	19.8245	24.0494	13.9747	12.3497	15.5996
407	17.8746	10.3997	14.6246	16.2496	22.0994	19.4995	24.6994	13.6497	12.9997	15.5996
408	18.1995	10.3997	14.2996	15.9246	22.0994	19.8245	24.3744	13.3247	12.3497	14.9496
409	17.8746	9.74976	14.9496	16.2496	22.0994	19.8245	24.6994	13.6497	12.6747	15.2746
410	18.1995	10.3997	14.6246	16.2496	22.4244	19.8245	23.7244	13.6497	13.3247	14.9496
411	18.1995	10.0747	14.9496	16.8996	21.7745	19.4995	25.3494	13.9747	12.9997	15.2746
412	17.8746	10.3997	14.2996	16.5746	22.0994	19.4995	24.0494	13.3247	12.6747	15.2746
413	18.1995	10.0747	15.2746	16.5746	21.7745	19.4995	24.3744	13.3247	12.6747	15.2746
414	18.1995	9.74976	14.9496	16.2496	22.0994	19.4995	24.6994	13.9747	12.6747	15.2746
415	18.1995	9.74976	14.9496	16.2496	21.7745	19.8245	23.7244	13.6497	12.9997	15.5996
416	18.1995	10.0747	14.6246	16.2496	22.4244	19.4995	24.3744	13.3247	12.9997	15.2746
417	18.1995	10.0747	14.2996	16.2496	22.0994	19.4995	24.3744	12.9997	12.6747	14.9496
418	18.1995	10.0747	14.9496	16.5746	22.0994	19.8245	24.0494	13.3247	12.6747	14.9496
419	17.8746	9.42476	14.6246	15.9246	21.7745	19.4995	24.0494	13.6497	13.3247	14.9496
420	17.8746	9.42476	15.2746	16.5746	22.0994	19.4995	24.6994	13.9747	12.9997	14.6246
421	18.1995	10.0747	14.2996	16.2496	22.0994	19.4995	24.6994	13.9747	12.9997	14.9496
422	17.8746	10.0747	15.9246	15.9246	21.7745	19.4995	23.7244	13.3247	12.6747	15.2746
423	17.8746	10.3997	14.6246	16.5746	21.7745	19.4995	24.0494	13.3247	12.9997	14.9496
424	18.1995	10.0747	14.9496	16.5746	22.0994	19.4995	23.3994	13.6497	13.6497	14.9496
425	18.5245	9.74976	14.2996	15.9246	21.7745	19.8245	24.0494	13.6497	12.6747	15.2746
426	17.8746	9.74976	14.2996	15.9246	21.7745	19.8245	24.3744	13.6497	13.3247	14.9496
427	18.1995	10.0747	15.2746	15.9246	22.0994	19.8245	23.7244	13.9747	12.9997	15.2746
428	18.1995	10.3997	14.2996	16.2496	21.4495	20.1495	24.0494	12.9997	12.9997	15.2746
429	18.1995	10.3997	14.9496	16.2496	22.0994	19.8245	24.0494	13.6497	12.9997	14.9496
430	17.8746	9.74976	14.9496	16.2496	22.0994	19.8245	23.7244	13.9747	13.3247	14.9496
431	17.8746	10.0747	14.6246	15.9246	22.0994	19.8245	24.3744	13.6497	12.9997	14.9496
432	18.1995	9.74976	14.9496	15.9246	21.7745	20.1495	23.7244	13.3247	12.6747	14.6246
433	18.1995	10.0747	14.6246	15.9246	22.0994	20.1495	24.0494	13.6497	12.6747	14.9496
434	18.1995	9.74976	14.6246	16.2496	22.4244	19.4995	24.0494	13.9747	12.6747	15.2746
435	17.8746	9.09977	13.9747	16.2496	22.4244	19.8245	23.7244	13.6497	12.9997	14.6246
436	18.5245	9.42476	13.9747	16.2496	21.7745	20.1495	24.0494	13.6497	12.9997	14.9496
437	17.8746	9.74976	14.6246	16.2496	21.7745	19.4995	24.0494	13.9747	13.3247	15.5996
438	18.1995	9.74976	14.6246	15.9246	21.4495	19.8245	24.3744	13.6497	13.3247	15.9246
439	17.8746	9.42476	14.2996	16.5746	22.4244	19.8245	24.0494	13.6497	12.6747	14.9496
440	18.5245	10.3997	14.2996	16.2496	22.4244	19.8245	23.3994	13.3247	12.9997	14.6246
441	17.8746	9.42476	14.2996	16.2496	21.7745	19.4995	24.0494	13.9747	13.3247	14.9496
442	17.8746	10.0747	14.2996	16.2496	21.7745	20.1495	23.7244	13.9747	12.6747	14.9496
443	17.5496	9.74976	15.2746	16.2496	21.7745	19.8245	24.0494	13.6497	12.6747	14.9496
444	18.1995	10.0747	15.2746	16.5746	21.7745	19.4995	24.0494	13.6497	12.6747	15.2746
445	17.8746	10.0747	14.9496	16.2496	21.7745	19.4995	24.0494	13.6497	13.3247	14.9496
446	18.1995	10.0747	14.9496	16.2496	21.7745	19.8245	23.3994	13.9747	12.9997	15.2746
447	17.8746	10.3997	14.6246	16.2496	22.0994	19.4995	24.0494	12.9997	12.6747	14.9496
448	18.1995	10.0747	14.2996	16.5746	22.0994	19.8245	23.7244	13.9747	12.9997	14.9496
449	17.8746	10.0747	14.9496	15.9246	21.4495	19.4995	24.0494	13.9747	12.9997	15.5996
450	18.1995	9.74976	14.6246	16.2496	21.7745	19.4995	24.3744	13.6497	12.6747	15.2746
451	17.5496	9.74976	14.6246	16.2496	22.0994	20.1495	24.0494	13.6497	12.9997	15.5996
452	17.8746	9.74976	14.2996	15.9246	21.7745	20.1495	24.3744	13.9747	12.6747	15.2746
453	18.1995	9.74976	14.6246	16.5746	22.0994	19.4995	24.0494	13.9747	12.6747	14.9496
454	18.1995	10.3997	13.9747	16.2496	22.4244	19.8245	24.0494	13.9747	12.6747	15.2746
455	18.1995	10.0747	14.2996	16.2496	21.7745	20.1495	23.7244	13.3247	13.3247	15.2746
456	17.8746	10.0747	13.9747	15.9246	22.0994	19.4995	24.3744	13.6497	12.9997	15.2746
457	18.1995	9.74976	13.9747	15.9246	21.7745	19.8245	24.0494	13.3247	12.6747	15.5996
458	17.8746	9.74976	13.3247	16.2496	22.0994	19.8245	24.0494	13.6497	12.6747	15.2746
459	18.1995	9.74976	13.9747	16.5746	22.4244	19.8245	24.0494	13.9747	12.6747	15.2746
460	17.8746	9.74976	14.2996	16.2496	22.4244	19.8245	24.3744	14.2996	12.6747	15.5996
461	18.1995	10.0747	14.6246	15.9246	22.4244	20.1495	23.7244	13.9747	12.6747	15.2746
462	17.8746	10.0747	14.2996	16.5746	22.4244	20.1495	24.3744	13.6497	12.3497	15.2746
463	18.1995	9.74976	14.2996	15.5996	22.0994	19.8245	23.7244	13.9747	12.9997	15.5996
464	18.1995	9.74976	14.6246	15.9246	22.4244	19.8245	24.0494	13.3247	12.6747	15.5996
465	17.8746	9.74976	14.6246	16.2496	22.7494	19.8245	24.0494	13.6497	12.9997	15.2746
466	17.8746	10.0747	14.6246	16.2496	22.0994	19.8245	24.3744	13.3247	12.6747	15.2746
467	18.1995	9.42476	14.6246	16.2496	22.4244	19.8245	23.7244	14.2996	12.6747	15.5996
468	18.1995	10.0747	14.2996	16.5746	22.0994	19.4995	24.3744	13.3247	12.9997	15.2746
469	17.8746	9.74976	14.9496	15.5996	22.4244	19.4995	24.0494	13.6497	12.9997	15.2746
470	17.8746	9.42476	14.6246	16.2496	22.4244	19.4995	24.0494	13.9747	12.6747	15.2746
471	18.1995	9.42476	14.2996	16.5746	22.7494	19.4995	24.0494	13.6497	12.9997	15.2746
472	17.8746	9.42476	13.3247	16.2496	22.0994	19.8245	24.0494	14.2996	12.6747	15.5996
473	17.8746	9.09977	13.9747	16.2496	22.4244	19.8245	24.0494	13.9747	12.3497	15.5996
474	18.1995	9.42476	14.6246	16.5746	22.4244	19.4995	24.3744	12.9997	12.9997	15.5996
475	18.1995	9.74976	14.6246	16.2496	22.7494	19.8245	23.7244	13.6497	12.9997	15.2746
476	18.1995	9.42476	14.2996	16.2496	22.4244	19.4995	24.3744	13.9747	12.9997	15.2746
477	18.1995	9.74976	14.6246	16.2496	22.4244	19.8245	24.0494	13.9747	12.9997	15.5996
478	18.1995	9.09977	14.2996	16.5746	22.4244	19.4995	23.7244	13.6497	12.9997	15.2746
479	17.8746	9.09977	14.2996	16.2496	22.4244	19.8245	24.0494	13.9747	12.9997	15.2746
480	17.8746	9.09977	13.9747	15.9246	22.4244	19.8245	23.7244	13.9747	12.9997	15.2746
481	18.1995	9.74976	14.9496	16.2496	22.4244	19.4995	24.0494	13.6497	12.9997	15.2746
482	17.8746	9.74976	14.6246	15.5996	22.4244	19.4995	23.7244	13.9747	12.6747	15.2746
483	18.1995	9.42476	14.9496	15.9246	23.0744	19.4995	23.7244	13.9747	12.9997	15.5996
484	18.1995	9.42476	14.6246	16.5746	22.4244	19.8245	23.7244	13.6497	12.9997	15.2746
485	18.5245	9.42476	14.6246	15.9246	22.7494	19.4995	24.0494	13.6497	12.9997	14.9496
486	17.8746	9.09977	14.6246	16.5746	22.7494	19.8245	24.3744	14.2996	12.9997	15.2746
487	17.5496	9.74976	14.6246	15.9246	22.4244	19.8245	24.0494	13.6497	12.6747	14.9496
488	18.1995	9.42476	14.2996	16.5746	22.7494	19.4995	24.0494	13.6497	12.6747	14.9496
489	17.5496	9.74976	15.2746	15.9246	22.4244	19.8245	24.0494	13.6497	12.9997	14.9496
490	18.1995	9.42476	14.6246	16.2496	23.0744	19.1745	23.7244	13.3247	12.9997	14.9496
491	17.8746	9.09977	14.9496	15.5996	22.4244	19.8245	23.7244	13.9747	12.9997	14.6246
492	17.8746	9.42476	14.2996	16.2496	22.4244	19.1745	23.7244	13.6497	13.3247	14.9496
493	18.1995	9.42476	14.6246	16.2496	22.4244	19.4995	24.0494	13.6497	12.9997	14.9496
494	17.8746	8.77478	13.9747	16.2496	22.7494	19.1745	24.0494	13.6497	13.3247	15.2746
495	18.1995	9.74976	14.2996	16.2496	22.4244	19.4995	23.3994	13.3247	12.9997	14.9496
496	17.5496	9.42476	14.6246	16.2496	22.7494	19.1745	23.7244	13.9747	12.6747	14.9496
497	17.5496	9.42476	14.9496	15.5996	22.7494	19.4995	23.7244	13.3247	12.9997	15.2746
498	18.1995	9.42476	14.9496	16.5746	22.4244	19.4995	24.0494	13.9747	12.9997	15.2746
499	17.8746	9.42476	14.9496	16.5746	22.7494	19.1745	24.0494	13.9747	13.3247	14.9496
500	18.1995	9.09977	14.9496	16.2496	22.7494	19.4995	24.0494	13.6497	13.3247	14.9496
501	18.1995	9.42476	13.6497	16.5746	22.7494	19.1745	24.0494	13.3247	12.9997	14.6246
502	18.1995	9.42476	13.6497	16.5746	23.0744	19.1745	24.0494	13.9747	13.3247	14.9496
503	17.8746	9.42476	15.2746	16.2496	22.7494	19.1745	24.0494	13.6497	12.6747	15.2746
504	18.1995	9.42476	15.5996	16.5746	22.7494	19.4995	24.0494	14.2996	12.6747	14.9496
505	17.8746	9.42476	14.9496	16.2496	22.4244	19.4995	23.3994	13.9747	12.9997	14.9496
506	17.8746	9.42476	14.6246	16.2496	22.4244	18.8495	24.0494	13.9747	12.9997	14.9496
507	17.5496	9.42476	15.2746	16.8996	22.7494	19.1745	23.7244	13.9747	12.9997	14.9496
508	18.1995	9.74976	14.2996	16.2496	22.4244	19.1745	24.0494	13.6497	12.9997	14.6246
509	17.8746	9.74976	14.2996	16.5746	22.7494	19.1745	23.7244	14.2996	13.3247	14.9496
510	17.8746	9.09977	14.6246	16.2496	22.4244	19.1745	23.7244	13.6497	12.9997	14.9496
511	17.8746	9.42476	13.9747	16.5746	22.7494	19.1745	23.7244	13.6497	12.9997	14.9496
512	17.8746	9.74976	14.2996	16.8996	22.7494	19.8245	24.0494	13.6497	12.9997	14.6246
513	17.8746	9.42476	14.2996	16.5746	22.7494	19.4995	23.7244	13.6497	12.9997	14.9496
514	18.1995	9.42476	13.9747	16.2496	23.3994	19.8245	23.7244	13.3247	12.9997	14.9496
515	17.8746	9.09977	15.2746	16.2496	22.7494	19.1745	24.0494	13.3247	12.9997	14.9496
516	17.8746	9.09977	14.9496	16.2496	22.4244	19.1745	23.7244	13.6497	13.3247	14.9496
517	17.8746	9.42476	14.6246	16.2496	23.0744	19.1745	23.7244	13.6497	12.9997	14.6246
518	17.8746	9.74976	13.9747	16.2496	22.7494	19.1745	23.7244	13.9747	13.3247	14.6246
519	17.8746	9.09977	14.9496	16.2496	22.7494	19.1745	23.7244	13.3247	12.9997	14.6246
520	17.8746	9.74976	14.2996	16.2496	22.4244	19.1745	23.3994	13.6497	12.9997	14.6246
521	18.1995	9.42476	14.9496	16.5746	22.4244	19.1745	23.0744	13.6497	13.3247	14.6246
522	18.1995	9.42476	14.2996	16.2496	22.7494	19.1745	24.0494	13.6497	13.3247	14.6246
523	17.8746	9.09977	14.6246	16.2496	22.7494	19.1745	23.7244	13.3247	13.3247	14.9496
524	18.1995	9.74976	15.5996	16.2496	22.4244	19.4995	23.7244	13.3247	12.9997	14.9496
525	17.8746	9.42476	14.2996	16.5746	22.4244	19.1745	23.7244	13.9747	13.3247	14.2996
526	18.1995	9.42476	15.5996	16.5746	22.7494	19.1745	23.7244	13.3247	13.3247	14.9496
527	17.8746	9.42476	13.9747	16.2496	22.4244	19.1745	24.0494	13.9747	12.9997	14.9496
528	18.1995	8.77478	14.9496	15.9246	22.7494	19.1745	23.7244	13.3247	13.3247	14.6246
529	17.8746	9.42476	15.5996	16.2496	22.4244	19.4995	23.0744	13.3247	13.3247	14.9496
530	17.8746	9.42476	14.2996	16.2496	23.0744	19.4995	23.7244	13.6497	12.9997	14.9496
531	17.5496	9.09977	14.6246	15.9246	22.7494	19.1745	23.3994	13.3247	13.3247	14.9496
532	17.8746	9.42476	15.2746	16.5746	22.4244	19.1745	23.7244	13.6497	12.9997	14.6246
533	18.1995	9.42476	13.9747	16.2496	22.4244	19.1745	23.7244	14.2996	13.3247	14.6246
534	18.1995	9.74976	15.5996	15.9246	22.4244	19.4995	23.3994	13.6497	12.9997	14.6246
535	17.8746	9.42476	14.9496	16.2496	22.0994	19.4995	23.0744	13.6497	13.3247	14.9496
536	17.8746	9.09977	14.6246	15.5996	22.7494	19.1745	23.7244	12.9997	12.9997	14.6246
537	18.1995	9.42476	15.2746	16.2496	22.4244	19.1745	24.3744	13.9747	12.9997	14.9496
538	17.8746	9.42476	14.9496	16.5746	23.0744	19.1745	23.3994	13.9747	12.9997	14.6246
539	18.1995	9.42476	14.9496	16.5746	22.4244	19.1745	23.7244	13.9747	12.9997	14.9496
540	17.8746	9.42476	14.6246	16.2496	22.7494	19.4995	23.7244	13.9747	12.9997	14.6246
541	18.5245	9.42476	14.9496	16.2496	22.4244	19.4995	23.3994	13.9747	13.3247	14.6246
542	18.1995	9.42476	14.9496	16.2496	22.7494	19.4995	23.3994	13.3247	13.3247	15.2746
543	18.1995	9.42476	14.6246	15.9246	22.4244	19.4995	23.3994	13.6497	13.3247	14.9496
544	18.5245	9.09977	14.6246	15.9246	22.0994	19.4995	23.3994	13.6497	13.3247	15.2746
545	17.8746	9.09977	15.5996	15.9246	22.7494	19.4995	24.0494	13.9747	13.3247	14.6246
546	17.8746	9.42476	15.2746	15.9246	22.4244	19.1745	23.3994	13.3247	12.9997	15.2746
547	18.1995	8.77478	14.9496	16.2496	23.0744	19.4995	23.3994	13.6497	13.3247	14.9496
548	17.8746	8.77478	14.9496	15.9246	22.4244	19.1745	23.7244	13.9747	13.3247	14.6246
549	17.8746	8.77478	13.6497	16.2496	23.0744	19.4995	23.7244	13.9747	13.3247	14.6246
550	18.1995	9.09977	14.6246	16.2496	22.4244	19.4995	24.0494	13.9747	13.3247	15.2746
551	18.1995	9.09977	14.6246	15.9246	23.0744	19.1745	23.7244	13.9747	13.3247	14.9496
552	17.8746	9.09977	14.9496	16.2496	22.0994	19.1745	24.0494	13.6497	13.3247	14.6246
553	17.8746	8.77478	13.9747	15.9246	22.4244	19.4995	23.7244	13.3247	12.9997	14.9496
554	17.8746	9.42476	14.9496	15.5996	22.7494	19.1745	23.7244	13.9747	12.9997	14.9496
555	17.8746	9.42476	15.2746	15.5996	23.0744	19.1745	24.0494	13.9747	13.3247	14.6246
556	17.8746	8.77478	14.6246	15.9246	22.7494	19.4995	23.7244	14.6246	12.9997	14.9496
557	17.8746	9.09977	14.2996	15.9246	22.4244	19.1745	24.0494	13.3247	13.3247	14.9496
558	18.1995	9.09977	14.2996	15.9246	22.7494	19.1745	23.7244	13.3247	13.3247	14.6246
559	18.1995	8.77478	14.2996	15.5996	22.4244	19.4995	23.3994	13.6497	13.3247	14.9496
560	18.1995	9.09977	14.6246	15.9246	23.0744	19.4995	23.7244	13.6497	13.3247	15.2746
561	18.1995	9.09977	14.6246	15.9246	23.0744	19.1745	23.7244	13.6497	13.3247	15.2746
562	17.8746	9.09977	14.6246	15.5996	22.7494	19.1745	23.7244	13.6497	12.9997	14.9496
563	18.5245	8.77478	15.2746	15.5996	23.0744	19.1745	23.3994	13.6497	13.3247	14.9496
564	18.1995	9.42476	14.6246	15.5996	22.7494	18.8495	23.7244	13.3247	13.3247	15.2746
565	18.1995	9.42476	14.2996	15.9246	23.0744	18.8495	23.7244	13.6497	13.3247	15.2746
566	17.8746	9.09977	14.2996	15.5996	22.7494	19.1745	23.3994	13.6497	13.3247	14.9496
567	18.5245	9.74976	14.6246	16.2496	22.7494	18.8495	24.0494	13.6497	13.3247	15.5996
568	18.1995	9.74976	15.2746	15.2746	22.4244	19.1745	24.0494	13.3247	13.3247	14.9496
569	18.5245	9.09977	15.5996	15.5996	22.4244	19.1745	23.7244	13.6497	13.3247	14.9496
570	17.8746	9.09977	14.6246	15.9246	23.0744	19.1745	23.0744	13.6497	13.3247	14.9496
571	18.1995	9.09977	14.6246	15.5996	22.7494	19.1745	23.7244	13.9747	13.6497	14.9496
572	18.1995	9.09977	14.6246	15.9246	22.4244	19.1745	23.7244	13.3247	13.3247	15.5996
573	17.8746	9.09977	15.2746	16.2496	22.4244	19.1745	23.3994	14.2996	13.6497	15.2746
574	17.8746	9.42476	14.2996	16.2496	22.4244	19.1745	23.0744	13.6497	13.3247	14.9496
575	18.1995	9.09977	14.2996	15.9246	22.7494	19.1745	23.3994	13.6497	13.6497	14.6246
576	18.1995	9.09977	14.2996	15.5996	22.7494	19.1745	24.0494	13.9747	13.3247	14.9496
577	17.8746	9.09977	14.2996	15.9246	23.0744	18.8495	24.0494	13.9747	13.3247	14.6246
578	17.8746	9.09977	14.9496	16.2496	22.7494	19.1745	23.0744	13.6497	13.3247	15.2746
579	18.1995	9.42476	14.6246	16.2496	22.7494	19.1745	23.7244	12.6747	13.3247	14.9496
580	17.8746	9.09977	15.2746	16.2496	22.7494	19.1745	24.3744	13.6497	13.6497	14.9496
581	17.8746	9.74976	14.6246	16.2496	22.7494	19.4995	23.7244	13.3247	13.3247	14.9496
582	18.1995	9.42476	14.9496	15.9246	23.0744	19.4995	23.7244	13.9747	13.6497	15.2746
583	18.1995	9.09977	14.6246	16.2496	23.0744	19.1745	23.7244	13.6497	13.3247	14.9496
584	17.8746	9.42476	14.9496	15.5996	22.7494	19.1745	23.7244	13.6497	13.3247	14.9496
585	18.1995	9.09977	14.6246	16.2496	23.0744	19.1745	24.0494	13.6497	13.3247	14.9496
586	18.1995	9.42476	13.9747	16.2496	22.7494	19.1745	23.7244	13.6497	13.3247	14.9496
587	17.8746	9.42476	14.9496	15.9246	22.7494	18.8495	23.3994	13.9747	13.3247	14.6246
588	18.1995	9.42476	13.9747	15.9246	23.0744	19.1745	24.0494	13.3247	13.3247	15.2746
589	18.1995	9.42476	14.6246	16.2496	22.7494	18.8495	24.0494	13.6497	13.6497	14.6246
590	18.1995	9.42476	14.6246	16.2496	22.7494	19.4995	23.7244	13.9747	13.3247	14.9496
591	17.8746	9.09977	14.2996	16.2496	22.4244	19.1745	23.7244	13.6497	13.3247	14.9496
592	17.8746	9.74976	14.6246	16.2496	23.0744	19.1745	23.7244	13.6497	13.6497	15.2746
593	17.8746	9.42476	14.6246	15.9246	23.0744	19.1745	23.7244	13.3247	13.3247	14.6246
594	18.5245	9.42476	14.2996	15.9246	22.7494	19.1745	23.0744	13.6497	13.3247	14.9496
595	18.1995	9.74976	14.6246	15.9246	22.7494	19.1745	24.3744	13.6497	13.3247	15.2746
596	18.1995	9.42476	14.6246	15.9246	22.7494	19.1745	23.7244	13.6497	13.3247	14.9496
597	17.8746	9.09977	14.9496	16.2496	22.7494	19.1745	23.3994	13.6497	12.9997	15.2746
598	17.8746	9.42476	15.2746	16.2496	22.7494	18.8495	23.7244	13.3247	12.9997	15.2746
599	18.1995	9.74976	14.9496	15.9246	23.0744	18.8495	23.3994	13.6497	13.6497	14.6246
600	17.8746	9.42476	14.9496	16.2496	23.0744	18.8495	23.7244	13.3247	13.3247	14.9496
601	17.8746	8.77478	14.6246	15.9246	22.4244	19.1745	24.3744	13.6497	13.3247	14.9496
602	17.8746	9.09977	14.9496	15.9246	23.0744	19.1745	23.7244	13.3247	13.3247	14.9496
603	17.8746	9.42476	14.6246	15.5996	22.4244	18.8495	23.3994	13.6497	13.3247	14.9496
604	18.1995	9.09977	14.6246	15.9246	23.0744	18.8495	23.3994	13.9747	13.6497	14.9496
605	17.8746	8.77478	14.2996	15.5996	23.0744	19.1745	23.7244	13.6497	13.3247	14.9496
606	17.8746	8.77478	14.6246	15.9246	23.0744	19.1745	24.0494	13.3247	13.3247	14.9496
607	18.1995	9.42476	14.2996	15.5996	22.4244	19.1745	23.3994	13.3247	13.3247	14.9496
608	17.8746	9.09977	14.6246	15.5996	23.0744	19.1745	24.0494	13.6497	13.3247	14.6246
609	17.8746	8.77478	14.6246	15.5996	22.7494	19.1745	24.0494	13.9747	12.9997	14.9496
610	17.8746	9.09977	13.9747	15.9246	22.7494	19.1745	24.3744	13.6497	13.3247	14.9496
611	17.8746	9.74976	13.9747	15.9246	22.4244	19.1745	23.3994	13.3247	13.3247	15.2746
612	17.8746	9.09977	14.6246	15.9246	23.0744	19.1745	23.7244	13.3247	13.3247	14.9496
613	18.1995	9.42476	14.6246	15.5996	22.4244	19.1745	23.7244	13.6497	13.3247	14.9496
614	17.8746	9.09977	14.9496	15.5996	22.7494	19.4995	24.0494	13.9747	13.3247	15.2746
615	17.8746	9.09977	14.9496	15.5996	22.7494	19.1745	23.7244	13.9747	13.3247	15.2746
616	18.1995	9.42476	14.6246	16.2496	23.0744	19.1745	23.3994	13.6497	13.3247	14.9496
617	17.8746	8.77478	14.9496	15.5996	22.4244	19.1745	24.0494	13.3247	13.3247	15.2746
618	17.8746	9.42476	14.6246	15.9246	22.7494	19.1745	23.3994	13.6497	13.3247	14.9496
619	18.1995	9.09977	14.6246	15.9246	23.0744	19.1745	24.0494	13.6497	13.3247	15.2746
620	17.8746	9.42476	14.2996	15.9246	23.0744	19.4995	23.3994	13.6497	13.3247	14.6246
621	17.8746	9.09977	14.9496	15.9246	23.0744	18.8495	23.7244	13.6497	13.3247	15.2746
622	17.8746	9.74976	14.2996	15.5996	23.0744	18.5245	23.7244	13.9747	13.3247	14.6246
623	17.5496	9.42476	14.6246	15.9246	22.7494	19.1745	23.3994	13.9747	12.9997	15.2746
624	18.1995	9.74976	14.9496	15.9246	22.7494	19.1745	24.0494	13.6497	13.3247	14.9496
625	17.8746	9.42476	14.6246	15.9246	22.7494	18.8495	24.0494	12.9997	13.6497	14.9496
626	17.8746	9.74976	15.2746	15.9246	22.7494	18.8495	23.7244	13.3247	13.3247	14.9496
627	17.8746	9.42476	14.6246	16.2496	22.4244	18.8495	24.0494	13.6497	13.6497	14.6246
628	17.8746	9.42476	14.9496	15.5996	22.7494	18.8495	24.6994	13.9747	13.6497	14.6246
629	17.8746	9.42476	14.6246	15.9246	22.7494	19.1745	25.0244	13.9747	13.6497	14.9496
630	17.8746	9.09977	14.6246	15.9246	22.7494	18.8495	24.0494	13.6497	13.6497	14.9496
631	17.8746	9.42476	14.6246	15.5996	22.4244	19.1745	24.3744	13.3247	13.3247	14.9496
632	17.8746	9.09977	14.9496	15.9246	22.4244	18.8495	24.0494	13.6497	13.3247	15.2746
633	17.5496	9.42476	14.6246	15.9246	22.7494	18.8495	24.0494	13.6497	13.6497	14.9496
634	17.8746	9.09977	14.9496	15.9246	22.7494	18.8495	23.7244	13.6497	13.6497	14.6246
635	17.8746	9.42476	14.2996	15.9246	23.0744	18.8495	24.6994	13.9747	13.3247	14.9496
636	17.8746	9.42476	14.2996	16.2496	22.7494	18.8495	24.3744	13.9747	12.9997	14.9496
637	17.8746	9.42476	14.9496	15.5996	22.7494	19.1745	24.0494	13.9747	13.3247	14.6246
638	17.8746	9.42476	14.6246	15.5996	22.7494	18.5245	23.7244	12.9997	13.3247	14.9496
639	17.5496	9.42476	14.6246	15.9246	22.7494	18.8495	23.7244	13.6497	12.9997	14.6246
640	17.8746	9.42476	14.2996	15.5996	23.0744	18.8495	24.0494	13.9747	13.3247	14.6246
641	18.1995	9.42476	14.6246	15.5996	22.7494	18.8495	23.7244	13.9747	13.6497	14.9496
642	17.5496	9.42476	14.9496	15.5996	22.7494	19.1745	23.7244	13.9747	13.3247	14.9496
643	17.8746	9.42476	14.6246	15.9246	23.0744	18.8495	23.7244	13.6497	13.3247	14.6246
644	17.8746	10.0747	14.6246	15.9246	22.7494	18.8495	24.0494	12.9997	13.3247	14.6246
645	17.8746	9.74976	14.2996	15.9246	23.0744	19.1745	24.3744	13.9747	12.9997	14.6246
646	18.1995	9.42476	15.5996	15.9246	22.7494	19.1745	24.0494	13.9747	12.9997	14.6246
647	17.5496	9.74976	14.6246	15.9246	22.7494	19.1745	23.7244	13.6497	12.9997	14.2996
648	18.1995	9.74976	14.6246	16.2496	22.7494	19.1745	23.3994	14.2996	13.3247	14.6246
649	17.5496	9.42476	14.6246	15.5996	22.4244	19.1745	24.3744	13.6497	12.9997	14.6246
650	17.8746	9.74976	14.9496	15.9246	22.7494	19.1745	23.7244	13.6497	12.9997	14.6246
651	17.8746	9.74976	14.9496	16.2496	22.7494	19.1745	24.0494	13.3247	13.6497	14.9496
652	17.8746	9.42476	14.2996	15.9246	22.7494	19.4995	23.7244	13.9747	13.3247	14.9496
653	18.1995	9.74976	14.9496	16.2496	22.7494	19.8245	23.3994	13.9747	13.3247	14.6246
654	17.8746	9.74976	14.9496	15.9246	23.0744	19.4995	24.3744	13.9747	13.3247	14.9496
655	17.8746	9.74976	14.2996	15.9246	23.0744	19.1745	23.7244	13.6497	12.9997	14.9496
656	17.5496	9.42476	15.5996	15.9246	23.0744	19.1745	23.7244	13.9747	12.9997	14.6246
657	17.8746	9.74976	14.9496	15.9246	22.7494	19.1745	24.6994	13.9747	13.3247	14.9496
658	17.5496	9.42476	14.2996	16.2496	22.7494	19.1745	23.7244	13.3247	13.3247	14.9496
659	17.8746	9.42476	15.5996	15.9246	22.4244	19.1745	23.7244	13.9747	12.9997	14.9496
660	18.1995	9.42476	14.2996	15.5996	22.7494	19.1745	24.0494	13.9747	13.6497	15.2746
661	17.5496	9.42476	15.5996	15.9246	22.7494	19.1745	24.0494	13.3247	13.3247	14.9496
662	17.8746	9.74976	13.6497	15.9246	22.4244	19.1745	24.3744	13.6497	12.9997	15.2746
663	18.1995	10.0747	14.6246	15.9246	22.7494	19.1745	23.7244	13.9747	13.3247	14.9496
664	17.5496	9.74976	14.2996	15.9246	22.7494	18.8495	24.0494	13.9747	13.3247	14.9496
665	18.1995	9.74976	14.6246	15.9246	22.7494	19.1745	23.7244	13.9747	13.3247	14.6246
666	17.8746	9.74976	14.2996	15.9246	22.4244	19.1745	23.3994	13.9747	13.3247	14.9496
667	17.5496	9.74976	14.2996	15.9246	22.7494	19.1745	23.7244	13.9747	13.3247	14.9496
668	17.8746	9.42476	13.9747	15.5996	22.7494	19.1745	23.3994	13.6497	13.3247	14.6246
669	18.1995	9.74976	14.9496	15.5996	22.7494	19.1745	23.3994	12.9997	12.9997	14.9496
670	18.1995	10.0747	14.6246	15.9246	22.7494	19.1745	23.7244	13.9747	13.3247	15.2746
671	17.8746	9.74976	14.2996	15.9246	22.7494	19.1745	24.0494	13.3247	13.3247	14.9496
672	17.8746	9.74976	14.6246	15.9246	22.4244	19.1745	23.7244	13.6497	13.6497	14.9496
673	17.8746	9.74976	14.2996	15.5996	22.7494	19.1745	24.0494	13.6497	13.3247	14.9496
674	17.8746	9.74976	14.9496	15.5996	23.0744	19.4995	24.0494	13.6497	13.3247	14.9496
675	18.1995	10.0747	14.6246	15.5996	23.0744	19.1745	24.0494	13.6497	13.6497	14.9496
676	18.1995	9.74976	14.9496	15.9246	22.4244	19.4995	23.7244	13.9747	13.3247	15.2746
677	18.1995	9.74976	14.9496	15.9246	22.7494	19.1745	24.0494	13.9747	13.3247	15.2746
678	17.8746	9.74976	15.2746	15.9246	22.7494	19.1745	23.0744	13.6497	13.6497	15.2746
679	18.1995	10.0747	15.2746	15.9246	22.7494	19.1745	24.3744	13.9747	13.6497	14.9496
680	18.1995	9.74976	13.9747	15.5996	23.0744	19.1745	23.7244	13.6497	13.6497	14.9496
681	17.8746	9.74976	13.9747	15.5996	22.7494	19.1745	23.7244	12.9997	13.3247	15.2746
682	18.1995	9.74976	13.9747	15.9246	22.7494	19.4995	24.0494	13.9747	13.6497	14.9496
683	17.8746	9.74976	14.2996	15.9246	23.0744	19.4995	23.3994	13.9747	13.3247	14.9496
684	18.1995	9.42476	14.2996	16.2496	23.0744	19.4995	23.7244	12.9997	13.6497	15.2746
685	17.8746	9.74976	14.2996	15.9246	22.7494	19.1745	23.7244	13.6497	13.3247	14.9496
686	17.8746	9.74976	13.3247	15.5996	22.7494	19.4995	24.6994	13.9747	13.6497	14.6246
687	17.8746	9.74976	14.2996	15.9246	22.7494	19.1745	23.3994	13.3247	13.6497	15.2746
688	18.1995	9.42476	14.2996	15.9246	22.4244	19.4995	23.7244	13.6497	13.3247	15.2746
689	18.1995	10.0747	14.2996	15.2746	22.7494	19.1745	23.3994	13.6497	13.3247	14.9496
690	17.8746	10.0747	14.2996	15.9246	22.7494	19.4995	23.3994	13.3247	13.3247	14.9496
691	18.1995	9.74976	14.6246	15.9246	22.7494	19.1745	23.7244	13.3247	13.3247	15.2746
692	18.1995	9.74976	14.6246	15.9246	22.7494	19.4995	23.7244	13.3247	13.3247	14.9496
693	18.1995	9.74976	15.2746	15.5996	22.7494	19.4995	23.7244	13.3247	13.6497	15.2746
694	18.1995	10.0747	14.6246	15.5996	22.7494	19.4995	24.0494	13.6497	13.3247	14.9496
695	17.8746	9.42476	13.9747	15.5996	23.0744	19.4995	24.0494	13.6497	13.3247	14.9496
696	17.8746	9.74976	14.6246	15.5996	22.7494	19.4995	23.7244	13.6497	13.3247	14.9496
697	18.1995	9.74976	14.6246	15.5996	22.7494	19.4995	23.3994	13.9747	13.3247	14.9496
698	18.1995	9.74976	14.2996	15.9246	22.4244	19.4995	23.3994	13.9747	13.3247	15.2746
699	17.8746	9.74976	14.6246	15.5996	22.4244	19.4995	24.3744	13.6497	13.3247	14.9496
700	17.5496	9.74976	14.9496	15.9246	22.7494	19.4995	23.7244	13.6497	13.3247	14.9496
701	18.1995	9.74976	13.9747	15.9246	22.4244	19.4995	24.0494	13.3247	13.3247	14.9496
702	17.8746	9.42476	14.6246	15.5996	22.7494	19.4995	23.3994	13.6497	13.6497	14.9496
703	18.1995	9.74976	14.6246	15.9246	22.7494	19.4995	24.0494	13.6497	13.3247	14.6246
704	18.1995	9.74976	13.9747	15.5996	22.7494	19.4995	24.0494	13.3247	13.6497	14.9496
705	18.1995	9.74976	13.6497	15.5996	22.7494	19.4995	24.0494	13.3247	13.3247	14.9496
706	17.8746	9.42476	14.6246	15.9246	22.7494	19.4995	24.3744	13.6497	12.9997	14.9496
707	18.1995	9.74976	13.9747	15.5996	22.4244	19.4995	23.3994	12.9997	13.3247	15.2746
708	17.8746	9.74976	14.2996	15.5996	22.4244	19.4995	23.3994	13.3247	13.3247	14.9496
709	18.1995	9.74976	14.2996	15.5996	22.4244	19.4995	23.7244	13.6497	12.9997	14.9496
710	18.1995	9.74976	13.9747	15.2746	22.7494	19.4995	23.7244	13.9747	13.3247	14.9496
711	18.1995	10.0747	13.9747	15.9246	22.4244	19.4995	23.7244	13.9747	13.3247	14.9496
712	18.1995	10.3997	13.9747	15.5996	22.4244	19.4995	24.0494	13.3247	12.9997	14.9496
713	17.8746	9.74976	14.2996	15.9246	22.7494	19.4995	24.0494	13.9747	13.3247	14.9496
714	18.1995	9.74976	13.9747	15.9246	22.4244	19.4995	23.7244	13.3247	13.3247	14.9496
715	18.1995	9.74976	14.2996	15.9246	22.4244	19.4995	23.7244	13.6497	13.6497	14.9496
716	18.5245	10.0747	14.9496	15.9246	22.7494	19.4995	24.0494	13.6497	13.6497	14.9496
717	18.1995	9.74976	14.2996	15.9246	22.7494	19.4995	24.0494	13.3247	12.9997	14.9496
718	17.8746	10.0747	14.6246	15.9246	22.7494	19.4995	23.7244	13.6497	13.6497	14.6246
719	18.1995	10.0747	14.2996	15.9246	22.0994	19.4995	24.3744	13.6497	12.9997	14.6246
720	17.8746	9.09977	14.2996	15.9246	22.7494	19.4995	24.0494	13.9747	13.6497	14.9496
721	18.1995	9.74976	14.6246	15.9246	22.4244	19.4995	24.0494	13.6497	13.3247	14.6246
722	18.1995	10.3997	14.9496	15.2746	22.7494	19.4995	23.7244	12.9997	13.6497	14.6246
723	17.8746	9.09977	14.2996	15.9246	22.7494	19.4995	23.3994	13.6497	13.6497	14.2996
724	18.1995	9.74976	14.6246	15.2746	22.4244	19.1745	24.0494	13.3247	13.3247	14.6246
725	17.8746	9.74976	14.2996	15.5996	22.7494	19.4995	24.0494	13.3247	13.6497	14.9496
726	17.8746	10.0747	14.9496	15.9246	22.4244	19.1745	23.0744	13.3247	13.9747	14.6246
727	17.5496	9.74976	14.2996	15.5996	22.7494	19.1745	24.3744	13.9747	13.3247	14.9496
728	18.1995	10.0747	14.2996	16.2496	22.7494	19.4995	24.0494	13.6497	13.3247	14.2996
729	18.1995	9.42476	14.2996	15.9246	22.7494	19.1745	24.3744	13.3247	13.6497	14.6246
730	17.8746	9.42476	14.6246	15.9246	23.0744	19.4995	24.3744	13.3247	13.3247	14.2996
731	17.8746	9.42476	14.2996	15.9246	22.7494	19.1745	23.7244	13.6497	13.3247	14.6246
732	17.8746	9.74976	13.9747	15.5996	22.4244	19.1745	23.7244	12.3497	13.6497	14.6246
733	18.1995	9.42476	14.6246	15.9246	22.7494	18.8495	24.0494	13.3247	13.6497	14.6246
734	17.8746	10.3997	14.6246	15.9246	22.4244	19.4995	24.0494	12.9997	13.6497	14.6246
735	18.1995	9.74976	14.9496	15.2746	22.7494	19.1745	23.7244	13.3247	13.6497	14.6246
736	17.8746	9.74976	14.6246	15.9246	22.7494	19.4995	24.6994	13.3247	13.6497	14.2996
737	17.8746	9.74976	14.9496	15.9246	22.7494	19.4995	24.0494	12.9997	12.9997	14.6246
738	17.8746	9.74976	14.6246	15.2746	22.4244	19.1745	23.7244	13.6497	13.6497	14.6246
739	18.1995	10.0747	14.6246	15.5996	22.7494	19.1745	24.0494	13.3247	13.3247	14.6246
740	18.1995	9.74976	15.2746	15.5996	22.7494	19.1745	24.3744	13.3247	13.3247	14.6246
741	17.5496	9.74976	14.6246	15.5996	22.7494	19.1745	23.7244	13.3247	13.3247	14.2996
742	17.5496	9.74976	13.9747	15.9246	22.4244	19.4995	24.6994	12.6747	13.3247	14.2996
743	17.5496	9.42476	14.2996	15.5996	22.7494	19.1745	24.0494	13.6497	13.6497	14.2996
744	18.1995	9.74976	14.2996	15.2746	22.7494	19.1745	23.7244	12.9997	13.3247	14.2996
745	18.1995	10.0747	13.9747	15.5996	22.4244	18.8495	23.3994	13.6497	13.3247	14.2996
746	18.1995	9.74976	13.9747	15.2746	22.4244	19.1745	23.3994	13.6497	13.3247	14.2996
747	17.5496	9.74976	14.2996	15.2746	22.4244	19.1745	24.0494	13.3247	13.6497	14.6246
748	17.8746	10.0747	13.9747	15.5996	22.4244	19.1745	24.0494	13.6497	13.3247	14.6246
749	17.8746	9.74976	14.6246	15.2746	22.7494	19.1745	24.6994	13.6497	13.3247	14.6246
750	17.8746	9.74976	13.6497	15.9246	22.7494	19.4995	23.7244	13.9747	13.6497	14.6246
751	17.8746	9.74976	14.6246	15.5996	22.4244	18.8495	23.7244	12.9997	13.3247	14.2996
752	18.1995	9.74976	14.6246	15.5996	22.7494	19.1745	24.0494	13.6497	13.6497	14.6246
753	17.8746	9.74976	13.9747	15.5996	22.4244	19.1745	24.3744	12.9997	13.6497	14.2996
754	17.8746	9.74976	15.2746	15.2746	22.7494	18.8495	24.0494	13.3247	13.3247	14.2996
755	17.5496	9.74976	14.2996	15.2746	22.4244	19.1745	24.3744	13.3247	13.3247	14.6246
756	17.8746	10.3997	13.9747	15.5996	22.4244	19.1745	24.3744	12.6747	13.3247	14.9496
757	17.5496	10.0747	13.9747	15.5996	22.4244	19.1745	23.3994	13.3247	13.6497	14.9496
758	17.8746	9.74976	14.6246	15.9246	22.7494	18.8495	23.3994	13.6497	13.3247	14.2996
759	17.8746	10.0747	14.2996	15.5996	22.4244	18.8495	24.0494	13.3247	13.3247	14.6246
760	17.8746	10.0747	13.9747	15.2746	22.4244	18.8495	23.7244	13.6497	13.3247	14.2996
761	17.8746	10.0747	14.6246	15.5996	22.7494	19.1745	23.7244	13.3247	13.3247	14.6246
762	17.8746	10.0747	13.9747	15.5996	22.7494	19.1745	24.0494	13.3247	13.6497	14.2996
763	17.8746	9.74976	13.9747	15.5996	22.7494	19.1745	23.3994	12.9997	13.6497	14.9496
764	17.8746	10.3997	14.2996	15.2746	22.4244	18.8495	23.7244	13.3247	13.3247	14.9496
765	17.8746	9.74976	14.2996	15.5996	22.4244	19.1745	23.3994	13.6497	13.6497	14.6246
766	17.8746	9.74976	13.9747	15.5996	22.7494	18.8495	24.3744	13.6497	13.6497	14.6246
767	17.8746	10.3997	14.2996	15.5996	22.7494	19.1745	24.0494	13.6497	13.6497	14.6246
768	17.5496	10.0747	14.9496	15.5996	22.7494	18.8495	23.7244	12.9997	13.6497	14.6246
769	17.8746	9.74976	14.6246	15.5996	22.4244	19.1745	24.0494	13.3247	13.6497	14.9496
770	17.8746	9.74976	14.9496	15.5996	22.4244	19.4995	24.3744	13.3247	13.3247	14.6246
771	17.5496	9.74976	13.9747	15.2746	22.4244	19.1745	23.7244	13.3247	13.3247	14.6246
772	17.8746	9.42476	13.9747	15.5996	22.7494	18.8495	24.0494	13.3247	13.3247	14.2996
773	17.8746	9.74976	14.2996	15.9246	22.4244	19.1745	24.3744	12.6747	13.6497	14.6246
774	17.5496	10.0747	13.9747	15.5996	22.7494	19.1745	24.3744	13.3247	13.6497	14.2996
775	17.8746	9.74976	14.6246	15.2746	22.4244	18.8495	24.3744	13.3247	13.3247	14.9496
776	17.8746	9.42476	13.9747	15.2746	23.0744	19.1745	24.3744	13.6497	13.6497	14.9496
777	17.8746	9.42476	13.9747	15.5996	22.7494	18.8495	23.3994	13.6497	13.6497	14.6246
778	17.5496	10.0747	14.2996	14.9496	22.7494	19.1745	24.0494	13.6497	13.6497	14.9496
779	17.8746	9.74976	13.9747	15.5996	22.7494	19.1745	24.0494	13.6497	13.6497	14.9496
780	17.5496	9.74976	14.6246	15.2746	22.4244	19.1745	23.7244	13.6497	13.6497	14.6246
781	17.8746	9.42476	14.6246	15.2746	22.7494	19.1745	23.7244	13.6497	13.3247	14.9496
782	17.8746	9.42476	14.2996	15.2746	22.4244	19.1745	24.0494	13.6497	13.6497	14.6246
783	17.5496	9.74976	14.2996	14.9496	22.7494	19.1745	24.3744	13.3247	13.6497	14.2996
784	17.5496	9.74976	14.2996	14.9496	22.4244	19.1745	23.7244	13.3247	13.6497	14.9496
785	17.8746	9.42476	14.9496	14.9496	22.4244	18.8495	24.0494	13.3247	13.3247	14.6246
786	17.8746	9.74976	14.9496	15.5996	22.7494	18.8495	23.7244	13.3247	13.6497	14.9496
787	17.8746	9.09977	14.6246	15.2746	22.4244	18.8495	24.0494	13.6497	13.6497	14.6246
788	17.8746	9.42476	14.6246	15.2746	22.4244	19.1745	23.7244	13.3247	13.6497	14.6246
789	17.5496	9.42476	14.6246	15.2746	22.7494	19.1745	23.7244	13.6497	13.6497	14.2996
790	17.8746	9.42476	14.2996	15.5996	22.4244	19.1745	23.7244	13.6497	13.3247	14.6246
791	17.8746	9.09977	14.2996	15.2746	22.7494	19.1745	24.0494	13.9747	13.6497	14.6246
792	17.8746	8.77478	14.6246	15.2746	22.7494	18.8495	24.3744	13.3247	13.6497	14.6246
793	17.8746	9.42476	14.9496	15.2746	22.7494	19.1745	24.3744	13.6497	13.3247	15.2746
794	17.5496	8.77478	14.6246	15.2746	22.7494	18.8495	24.3744	13.3247	12.9997	15.2746
795	17.5496	9.42476	14.6246	14.9496	22.4244	19.1745	24.3744	13.3247	13.3247	14.9496
796	17.8746	9.74976	14.6246	14.9496	22.7494	18.8495	24.0494	13.9747	13.6497	14.6246
797	17.8746	9.42476	14.9496	15.2746	22.7494	18.8495	24.3744	13.9747	13.3247	14.2996
798	17.5496	9.09977	14.6246	14.9496	22.4244	18.8495	24.0494	13.6497	13.6497	14.6246
799	18.1995	8.77478	14.6246	15.2746	23.0744	19.1745	24.0494	13.3247	13.6497	14.6246
800	18.1995	9.42476	14.2996	15.2746	23.0744	19.1745	23.7244	13.6497	13.3247	14.6246
801	17.5496	9.09977	14.6246	14.9496	22.7494	19.1745	24.3744	13.6497	13.3247	14.6246
802	17.8746	9.09977	14.6246	14.9496	22.7494	18.8495	24.6994	13.3247	12.9997	14.9496
803	17.8746	9.42476	14.6246	15.5996	23.0744	19.1745	24.6994	13.6497	13.3247	14.9496
804	17.8746	9.42476	14.9496	14.9496	23.0744	19.1745	23.7244	13.6497	13.9747	15.2746
805	17.8746	9.42476	14.6246	15.2746	22.7494	19.1745	24.0494	13.3247	13.6497	14.9496
806	17.8746	9.74976	13.9747	15.2746	22.4244	18.8495	24.0494	12.9997	13.3247	14.9496
807	17.8746	9.42476	14.6246	14.9496	23.0744	19.1745	24.6994	12.9997	13.6497	14.2996
808	17.5496	9.42476	14.6246	14.9496	22.7494	19.1745	24.6994	13.3247	13.6497	14.6246
809	17.8746	9.09977	14.6246	15.2746	22.7494	18.8495	24.6994	13.3247	13.6497	14.6246
810	17.5496	9.09977	14.9496	15.2746	23.0744	18.8495	24.3744	13.9747	12.9997	14.9496
811	17.8746	9.42476	14.9496	14.9496	22.7494	19.1745	24.3744	13.3247	13.3247	14.9496
812	17.8746	9.42476	15.2746	15.2746	23.0744	19.1745	24.3744	13.9747	13.3247	14.6246
813	17.8746	9.09977	14.6246	14.9496	22.7494	19.4995	24.0494	13.9747	13.3247	14.6246
814	17.5496	9.42476	14.6246	15.5996	22.4244	19.1745	24.0494	12.6747	13.6497	14.9496
815	17.5496	9.42476	14.2996	15.2746	22.4244	18.8495	24.6994	13.3247	13.6497	14.6246
816	18.1995	9.42476	14.6246	14.9496	22.4244	18.8495	24.3744	13.9747	13.3247	14.6246
817	17.8746	9.42476	14.2996	15.2746	23.0744	18.8495	24.0494	13.6497	13.6497	14.9496
818	17.5496	9.74976	14.2996	14.9496	23.0744	19.1745	23.7244	13.9747	13.3247	14.6246
819	17.8746	9.42476	14.9496	15.2746	23.0744	18.8495	24.3744	13.3247	13.6497	14.6246
820	17.8746	9.74976	14.9496	14.9496	22.4244	18.8495	24.0494	14.2996	13.6497	14.9496
821	17.5496	9.42476	14.9496	15.2746	23.0744	18.8495	24.3744	13.3247	13.3247	14.6246
822	17.5496	9.74976	14.9496	15.2746	23.0744	19.4995	24.0494	13.6497	13.6497	14.6246
823	17.8746	9.42476	15.2746	14.9496	22.4244	18.8495	23.7244	13.6497	13.6497	14.6246
824	17.8746	9.09977	15.5996	14.9496	23.0744	19.1745	24.0494	13.3247	13.3247	14.9496
825	17.8746	9.09977	14.6246	15.2746	22.7494	19.4995	23.7244	13.6497	13.6497	14.6246
826	17.8746	9.42476	14.6246	15.2746	22.4244	19.1745	24.3744	13.6497	13.9747	14.6246
827	17.8746	8.77478	15.2746	15.2746	22.4244	19.1745	24.0494	13.9747	13.9747	14.2996
828	18.1995	9.09977	14.2996	15.2746	22.7494	19.1745	24.0494	13.3247	13.6497	15.2746
829	18.1995	9.42476	14.9496	15.2746	22.4244	19.1745	24.6994	13.6497	13.6497	14.9496
830	18.1995	9.42476	14.2996	14.9496	22.7494	19.1745	24.0494	13.9747	13.6497	14.6246
831	17.5496	9.42476	14.9496	15.2746	23.0744	19.4995	24.0494	13.6497	13.6497	14.9496
832	17.8746	9.42476	15.2746	14.6246	22.4244	19.1745	24.3744	13.3247	13.3247	14.6246
833	17.5496	9.09977	14.6246	15.2746	22.7494	19.1745	23.7244	12.9997	13.9747	14.6246
834	17.8746	9.42476	14.6246	15.2746	23.0744	19.1745	24.3744	13.3247	13.6497	14.6246
835	17.8746	9.42476	14.2996	15.2746	23.0744	19.4995	24.3744	13.6497	13.6497	14.6246
836	17.2246	9.09977	14.6246	15.2746	23.0744	19.1745	23.7244	13.6497	13.6497	14.2996
837	18.1995	8.77478	13.9747	15.2746	23.0744	19.1745	24.0494	13.3247	13.6497	14.9496
838	17.8746	9.42476	14.2996	15.2746	22.7494	19.4995	23.7244	13.3247	13.6497	14.6246
839	17.8746	9.42476	14.6246	15.2746	22.7494	19.4995	24.0494	13.3247	13.6497	14.6246
840	17.5496	9.42476	14.6246	14.9496	22.4244	19.1745	23.7244	13.6497	13.6497	14.6246
841	17.8746	9.42476	14.2996	14.9496	22.7494	19.1745	24.0494	13.3247	13.6497	14.9496
842	17.8746	9.42476	14.9496	15.2746	23.0744	18.8495	24.6994	13.3247	13.6497	14.6246
843	17.5496	9.42476	14.2996	15.5996	22.7494	19.4995	24.0494	13.3247	13.6497	14.6246
844	17.8746	9.42476	14.6246	15.2746	22.4244	19.1745	23.7244	13.9747	13.6497	14.6246
845	18.1995	9.42476	14.6246	15.2746	22.7494	19.4995	24.0494	13.6497	13.6497	14.6246
846	17.8746	9.09977	14.6246	15.2746	22.7494	19.1745	23.7244	13.6497	13.9747	14.9496
847	17.5496	9.42476	14.2996	14.9496	23.0744	19.1745	24.0494	13.6497	13.6497	14.2996
848	17.8746	9.09977	14.9496	15.5996	22.4244	18.8495	24.0494	13.9747	13.6497	14.6246
849	17.8746	10.0747	14.2996	15.2746	23.0744	19.4995	24.0494	13.6497	13.9747	14.2996
850	17.8746	9.09977	14.9496	14.9496	23.0744	19.4995	23.7244	13.6497	13.6497	14.6246
851	18.1995	9.42476	14.6246	15.2746	22.7494	19.1745	23.7244	13.3247	13.6497	14.9496
852	17.8746	9.42476	14.9496	15.2746	23.0744	19.1745	23.3994	13.9747	13.6497	14.6246
853	18.1995	9.42476	14.9496	14.9496	23.0744	19.1745	24.0494	13.6497	13.6497	14.6246
854	17.8746	9.42476	14.6246	14.9496	23.0744	18.8495	24.0494	13.3247	13.6497	14.9496
855	17.5496	9.42476	14.9496	14.9496	22.4244	19.4995	24.6994	13.3247	13.9747	14.2996
856	17.8746	9.09977	15.2746	15.2746	22.7494	19.4995	24.3744	13.6497	13.6497	14.2996
857	17.8746	9.74976	13.6497	15.2746	22.7494	19.4995	24.0494	12.9997	13.6497	14.2996
858	17.8746	9.74976	14.9496	15.2746	22.7494	19.4995	23.7244	12.9997	13.6497	14.6246
859	17.8746	9.74976	14.9496	15.2746	22.7494	19.4995	24.3744	13.6497	13.6497	14.6246
860	18.1995	9.42476	15.5996	15.2746	22.7494	19.4995	24.3744	13.6497	13.6497	14.6246
861	17.8746	9.42476	15.2746	15.2746	22.7494	19.1745	23.7244	12.9997	13.6497	14.6246
862	17.2246	9.42476	15.2746	14.9496	22.7494	19.1745	23.7244	13.3247	13.6497	14.9496
863	17.5496	9.42476	15.2746	15.2746	22.7494	19.1745	23.7244	13.3247	13.6497	14.2996
864	17.5496	9.74976	14.9496	15.2746	22.7494	19.4995	24.3744	13.3247	13.6497	14.2996
865	18.1995	9.74976	14.6246	15.2746	22.7494	19.1745	24.0494	13.9747	13.6497	14.2996
866	17.5496	9.74976	14.9496	15.2746	22.4244	19.1745	24.0494	13.3247	13.6497	14.9496
867	18.1995	9.74976	15.2746	15.2746	22.7494	19.1745	24.0494	13.6497	13.6497	14.6246
868	18.1995	9.74976	14.6246	15.2746	22.7494	19.8245	24.3744	13.6497	13.6497	14.6246
869	18.1995	9.74976	15.2746	15.5996	23.0744	19.1745	23.7244	13.3247	13.6497	14.9496
870	17.8746	9.42476	14.6246	15.2746	22.4244	19.4995	23.3994	13.3247	13.6497	14.2996
871	17.8746	9.74976	14.9496	14.9496	22.7494	19.1745	24.0494	13.3247	13.6497	14.9496
872	18.1995	10.0747	14.9496	15.2746	22.7494	19.1745	24.0494	13.3247	13.3247	14.6246
873	17.8746	10.0747	14.9496	15.2746	22.7494	19.4995	23.7244	13.3247	13.6497	14.6246
874	18.1995	9.74976	14.2996	15.2746	22.7494	19.1745	23.7244	12.9997	13.6497	14.6246
875	17.8746	9.74976	14.2996	15.9246	22.7494	18.8495	23.7244	13.3247	13.6497	14.9496
876	17.8746	9.74976	14.9496	15.2746	22.7494	19.1745	23.7244	13.6497	13.6497	14.2996
877	17.8746	9.74976	14.9496	14.9496	23.0744	19.1745	23.7244	13.6497	13.6497	14.6246
878	17.8746	9.74976	14.6246	14.9496	22.7494	19.1745	23.7244	13.3247	13.6497	14.6246
879	17.5496	9.74976	14.9496	15.5996	22.7494	19.4995	24.3744	13.3247	13.6497	14.9496
880	17.8746	9.42476	15.5996	15.5996	23.0744	18.8495	23.3994	13.6497	13.9747	14.9496
881	17.8746	9.74976	14.6246	14.9496	22.7494	19.1745	24.0494	13.6497	13.6497	14.6246
882	17.8746	9.74976	14.2996	15.2746	22.7494	19.1745	24.3744	12.9997	13.9747	14.9496
883	17.8746	9.74976	14.9496	15.2746	22.7494	18.8495	23.7244	13.3247	13.9747	14.9496
884	17.8746	9.74976	14.9496	14.9496	22.7494	19.1745	24.3744	12.9997	13.6497	14.6246
885	17.5496	9.74976	14.9496	15.5996	22.7494	19.1745	24.0494	13.9747	13.6497	14.6246
886	17.5496	9.74976	14.2996	14.9496	23.0744	19.1745	24.3744	13.3247	13.6497	14.9496
887	17.8746	9.74976	13.9747	15.2746	23.0744	18.8495	24.3744	13.3247	13.6497	15.2746
888	17.8746	9.74976	14.6246	15.2746	22.7494	18.8495	23.7244	13.3247	13.6497	14.9496
889	17.8746	9.42476	14.6246	15.2746	22.4244	19.1745	24.3744	12.9997	13.6497	14.9496
890	17.8746	9.74976	14.6246	15.2746	22.7494	19.1745	24.3744	13.9747	13.6497	14.9496
891	18.1995	9.74976	13.9747	15.2746	22.7494	19.1745	24.0494	13.3247	13.6497	14.9496
892	18.1995	9.74976	14.2996	14.9496	22.7494	18.8495	24.3744	13.6497	13.6497	14.9496
893	17.5496	9.74976	14.2996	15.2746	22.4244	18.8495	24.6994	13.3247	13.6497	14.9496
894	18.1995	10.0747	14.9496	14.9496	22.7494	19.1745	24.6994	13.6497	13.6497	14.6246
895	17.8746	10.0747	15.2746	14.9496	22.4244	19.4995	24.3744	13.3247	13.6497	14.9496
896	17.8746	9.74976	13.9747	15.5996	22.7494	19.1745	23.7244	14.2996	13.6497	14.9496
897	18.1995	10.0747	14.9496	14.9496	22.7494	19.1745	24.0494	13.6497	13.9747	14.9496
898	18.5245	9.74976	14.6246	15.2746	22.7494	19.1745	24.6994	13.3247	13.9747	14.9496
899	17.5496	10.0747	14.6246	15.2746	22.7494	19.4995	24.3744	13.6497	13.9747	14.9496
900	17.5496	10.0747	14.2996	15.2746	22.7494	18.8495	24.3744	13.3247	13.6497	15.2746
901	18.1995	10.0747	14.9496	14.9496	22.7494	19.1745	24.0494	13.3247	13.6497	14.9496
902	18.1995	9.74976	13.9747	14.9496	22.4244	19.4995	24.3744	12.9997	13.9747	14.6246
903	17.8746	10.0747	14.9496	14.9496	22.7494	19.1745	23.7244	12.9997	13.3247	14.6246
904	17.8746	9.74976	15.2746	14.9496	22.4244	19.1745	24.3744	13.3247	13.6497	14.9496
905	17.8746	9.74976	13.9747	15.5996	22.7494	18.8495	24.0494	13.6497	13.6497	14.9496
906	18.5245	9.74976	14.6246	14.9496	22.7494	19.1745	23.7244	13.3247	13.9747	14.9496
907	17.8746	10.0747	14.2996	15.5996	22.7494	19.1745	24.3744	13.3247	13.6497	14.9496
908	17.8746	9.74976	14.2996	15.2746	22.7494	19.1745	24.6994	13.6497	13.6497	15.2746
909	18.1995	9.74976	14.6246	15.2746	23.0744	18.8495	24.0494	12.9997	13.6497	14.9496
910	17.8746	9.74976	15.2746	14.9496	22.7494	18.8495	24.0494	13.3247	13.9747	14.9496
911	18.1995	9.74976	14.6246	14.9496	23.0744	18.8495	24.3744	13.6497	13.9747	14.6246
912	17.8746	9.74976	14.9496	15.2746	22.7494	19.1745	23.3994	13.6497	13.6497	14.9496
913	17.5496	9.42476	14.6246	14.6246	23.0744	19.1745	24.3744	13.3247	13.6497	14.6246
914	17.8746	9.42476	14.6246	15.2746	22.7494	19.1745	23.3994	13.3247	13.6497	14.6246
915	17.5496	9.74976	13.9747	14.9496	23.0744	19.1745	24.0494	13.3247	13.6497	14.6246
916	17.8746	9.74976	14.6246	15.2746	22.7494	18.8495	24.3744	13.6497	13.6497	14.9496
917	17.8746	9.74976	13.9747	14.9496	22.7494	18.8495	23.7244	13.3247	13.9747	14.9496
918	17.8746	9.74976	13.9747	14.9496	23.0744	18.8495	24.0494	13.6497	13.6497	14.6246
919	17.8746	9.74976	14.2996	14.9496	22.7494	18.8495	24.0494	13.3247	13.6497	14.9496
920	18.1995	9.74976	14.6246	15.5996	22.7494	18.8495	24.0494	13.3247	13.9747	14.9496
921	17.8746	10.0747	14.2996	14.9496	23.0744	18.8495	24.0494	13.9747	13.6497	14.9496
922	17.8746	10.0747	14.2996	14.6246	23.0744	18.8495	23.7244	13.3247	13.9747	15.2746
923	17.5496	9.74976	13.9747	14.9496	22.7494	18.8495	23.7244	13.6497	13.6497	14.9496
924	17.8746	9.74976	14.6246	15.2746	22.7494	18.8495	23.7244	13.9747	13.6497	14.9496
925	17.8746	10.0747	14.9496	15.2746	22.7494	18.8495	23.7244	13.9747	13.6497	15.2746
926	17.8746	10.0747	14.9496	14.9496	22.7494	18.8495	24.0494	13.6497	13.6497	14.6246
927	17.8746	10.0747	14.6246	14.9496	22.7494	18.8495	23.3994	13.3247	13.9747	14.2996
928	17.5496	9.74976	14.6246	15.2746	22.7494	19.1745	23.7244	12.6747	13.9747	14.6246
929	17.8746	10.0747	13.9747	15.2746	22.7494	18.8495	24.0494	13.6497	13.6497	14.2996
930	17.8746	10.0747	14.2996	15.2746	22.7494	18.8495	23.7244	12.6747	13.6497	14.6246
931	17.8746	10.0747	14.6246	14.9496	22.7494	18.8495	23.7244	12.9997	13.6497	14.6246
932	17.8746	10.0747	14.6246	14.9496	22.7494	18.8495	23.3994	13.6497	13.6497	14.6246
933	17.8746	10.0747	14.6246	14.9496	22.7494	18.8495	23.7244	12.9997	13.6497	14.6246
934	17.8746	9.74976	14.6246	14.9496	22.7494	18.8495	23.7244	13.6497	13.6497	14.6246
935	17.8746	9.74976	14.2996	14.9496	22.7494	19.1745	23.7244	13.3247	13.6497	14.6246
936	17.8746	10.3997	14.2996	14.9496	22.7494	18.8495	24.0494	13.6497	13.6497	14.6246
937	17.5496	9.74976	14.6246	14.6246	22.7494	18.8495	23.7244	13.3247	13.6497	14.2996
938	17.5496	9.74976	14.6246	15.2746	22.7494	19.1745	24.3744	13.6497	13.6497	14.6246
939	17.8746	9.74976	14.6246	14.6246	22.7494	19.1745	24.3744	13.3247	13.6497	14.6246
940	17.8746	10.0747	14.6246	15.2746	22.7494	18.8495	23.7244	13.3247	13.6497	14.6246
941	17.8746	10.3997	14.6246	15.2746	22.7494	18.8495	23.3994	13.6497	13.6497	14.9496
942	17.2246	9.74976	14.6246	15.2746	22.7494	19.4995	23.7244	13.3247	13.9747	15.2746
943	17.5496	10.0747	14.2996	15.2746	22.7494	18.8495	24.3744	13.3247	13.6497	14.6246
944	18.1995	10.0747	14.6246	14.9496	23.0744	19.4995	23.7244	12.9997	13.6497	14.2996
945	17.5496	10.0747	14.2996	14.9496	22.7494	18.8495	23.7244	13.3247	13.6497	14.9496
946	18.1995	9.74976	14.6246	15.2746	22.7494	19.1745	23.3994	12.9997	13.3247	14.6246
947	17.8746	10.0747	14.6246	15.2746	22.7494	18.8495	24.0494	13.3247	13.6497	14.9496
948	17.5496	10.0747	14.2996	14.9496	23.0744	19.4995	23.7244	13.3247	13.6497	14.6246
949	17.8746	9.74976	14.9496	14.9496	23.0744	19.1745	24.0494	13.6497	13.3247	14.9496
950	17.8746	10.0747	14.6246	14.9496	22.7494	18.8495	24.0494	13.6497	13.6497	14.9496
951	17.8746	10.0747	15.5996	15.2746	23.0744	19.4995	24.3744	13.6497	13.6497	14.9496
952	17.5496	9.74976	14.2996	14.9496	23.0744	19.1745	24.3744	13.6497	13.6497	14.6246
953	18.1995	10.0747	14.2996	15.2746	22.7494	19.1745	24.6994	13.6497	13.6497	14.6246
954	18.5245	9.74976	14.6246	15.2746	22.7494	19.1745	23.3994	13.6497	13.9747	15.2746
955	17.5496	9.74976	14.9496	15.2746	22.7494	19.4995	23.3994	12.9997	13.3247	14.6246
956	18.1995	9.74976	14.6246	15.2746	22.7494	19.1745	23.7244	13.3247	13.9747	14.6246
957	18.1995	9.74976	14.2996	15.2746	22.7494	19.1745	24.0494	13.3247	13.6497	14.6246
958	17.8746	9.74976	14.9496	15.2746	22.7494	19.1745	23.7244	13.3247	13.9747	14.9496
959	17.8746	9.74976	14.9496	15.2746	23.0744	19.1745	24.0494	13.3247	13.9747	14.6246
960	18.1995	9.74976	14.6246	14.9496	22.7494	19.4995	24.3744	12.9997	13.9747	14.9496
961	17.8746	9.74976	14.2996	14.9496	23.0744	18.8495	24.0494	12.9997	13.6497	14.6246
962	18.1995	9.42476	15.2746	15.2746	22.7494	19.1745	23.7244	13.3247	13.6497	15.5996
963	17.8746	9.74976	14.9496	14.9496	22.7494	18.8495	23.7244	13.6497	13.6497	14.9496
964	17.8746	10.0747	13.9747	15.5996	23.0744	19.4995	23.7244	13.3247	13.6497	14.6246
965	17.5496	9.74976	14.6246	15.2746	22.7494	19.4995	24.0494	13.3247	14.2996	14.9496
966	17.8746	9.42476	14.6246	14.9496	22.7494	19.4995	23.3994	13.6497	13.9747	15.2746
967	17.8746	10.3997	14.6246	15.2746	22.7494	18.8495	23.7244	12.9997	13.6497	14.6246
968	17.8746	10.0747	15.2746	15.2746	22.7494	19.1745	24.0494	13.3247	13.6497	14.2996
969	17.8746	9.74976	14.9496	15.2746	23.0744	19.1745	24.3744	13.3247	13.9747	14.6246
970	17.8746	9.74976	14.9496	15.2746	23.0744	19.4995	23.7244	13.3247	14.2996	14.9496
971	18.1995	9.74976	14.6246	15.2746	22.7494	19.4995	24.0494	13.3247	13.6497	15.2746
972	18.1995	10.0747	14.9496	15.2746	23.0744	19.1745	23.7244	13.3247	13.6497	15.2746
973	18.1995	10.0747	14.2996	15.2746	23.0744	19.1745	23.7244	13.3247	13.9747	15.2746
974	17.5496	10.0747	14.6246	15.2746	23.0744	19.4995	24.3744	13.3247	13.9747	14.6246
975	17.8746	9.74976	14.6246	15.5996	23.0744	19.1745	23.7244	12.9997	13.6497	14.9496
976	17.8746	9.09977	14.6246	15.2746	22.7494	18.8495	23.7244	13.3247	13.6497	14.6246
977	17.8746	10.0747	13.6497	15.2746	23.3994	19.1745	23.7244	13.3247	13.6497	14.9496
978	18.1995	9.42476	14.2996	15.2746	23.0744	19.4995	23.7244	13.6497	13.6497	14.2996
979	17.8746	9.09977	14.9496	14.9496	22.7494	19.4995	23.7244	13.3247	13.6497	14.2996
980	17.8746	9.42476	14.9496	15.2746	23.0744	19.4995	23.3994	13.3247	13.9747	14.6246
981	17.8746	9.74976	14.6246	15.5996	22.7494	19.4995	24.0494	13.3247	13.6497	14.2996
982	17.8746	9.42476	14.9496	15.2746	22.7494	19.4995	23.0744	13.3247	13.6497	14.2996
983	17.8746	9.74976	14.9496	14.9496	23.0744	18.8495	23.3994	13.3247	13.6497	14.2996
984	17.8746	9.42476	14.6246	15.2746	22.7494	18.8495	23.7244	13.3247	13.6497	14.6246
985	17.8746	9.42476	13.9747	15.2746	23.0744	19.4995	23.7244	12.9997	13.9747	14.2996
986	17.8746	9.74976	14.9496	15.2746	22.7494	19.1745	23.3994	13.3247	13.6497	14.2996
987	18.1995	9.42476	14.2996	15.2746	22.7494	19.1745	23.3994	12.9997	13.6497	14.2996
988	18.8495	9.74976	14.6246	15.2746	22.7494	19.1745	24.0494	13.9747	13.6497	14.6246
989	17.5496	9.74976	14.9496	15.2746	22.7494	19.1745	23.7244	13.6497	13.9747	14.2996
990	17.8746	9.09977	14.9496	15.2746	23.0744	19.1745	24.0494	13.3247	13.9747	13.9747
991	18.5245	9.42476	14.2996	15.2746	22.7494	19.1745	23.7244	13.3247	13.6497	14.2996
992	18.1995	9.74976	15.5996	14.9496	22.7494	19.4995	23.3994	12.9997	13.9747	14.6246
993	17.8746	9.42476	14.2996	14.9496	23.0744	19.1745	24.0494	13.3247	13.6497	14.9496
994	17.5496	9.74976	14.6246	15.2746	22.7494	19.1745	23.3994	12.6747	13.6497	14.2996
995	17.8746	9.74976	15.2746	14.6246	22.7494	19.4995	23.7244	13.6497	13.6497	13.9747
996	18.1995	9.74976	14.6246	14.9496	22.7494	19.1745	23.7244	13.3247	13.9747	14.6246
997	17.8746	9.74976	14.2996	15.2746	22.7494	19.4995	23.3994	13.3247	14.2996	14.2996
998	17.8746	9.42476	14.2996	15.2746	22.7494	19.4995	24.0494	13.3247	13.6497	14.6246
999	17.8746	9.74976	14.6246	15.2746	22.7494	19.1745	23.3994	13.6497	13.6497	14.6246
1000	17.8746	9.42476	14.2996	14.6246	22.7494	19.4995	23.7244	12.6747	13.6497	14.6246
1001	18.1995	10.0747	14.2996	14.9496	23.0744	19.1745	23.0744	13.6497	13.9747	14.6246
1002	17.8746	9.74976	14.6246	15.2746	23.0744	19.4995	23.3994	13.3247	13.9747	14.6246
1003	17.8746	9.09977	14.2996	15.2746	22.7494	19.4995	23.3994	13.3247	13.9747	14.2996
1004	17.5496	9.09977	14.6246	14.9496	22.7494	19.4995	23.7244	13.6497	13.6497	14.9496
1005	17.8746	9.09977	13.9747	15.5996	22.7494	19.1745	23.3994	12.9997	13.6497	14.6246
1006	17.8746	9.09977	14.9496	14.9496	22.7494	19.8245	23.3994	12.9997	13.6497	14.2996
1007	17.8746	9.42476	13.9747	14.9496	22.7494	19.4995	23.7244	12.9997	13.9747	14.6246
1008	17.8746	9.74976	15.2746	15.5996	22.7494	19.1745	23.3994	13.3247	13.9747	14.6246
1009	17.8746	9.42476	13.9747	15.2746	22.7494	19.1745	23.3994	13.3247	13.6497	14.6246
1010	17.8746	9.09977	14.2996	15.2746	22.7494	19.1745	23.7244	12.9997	13.6497	14.2996
1011	18.1995	9.74976	14.2996	15.5996	23.0744	19.4995	23.3994	12.9997	13.9747	14.6246
1012	18.1995	9.09977	14.9496	15.2746	22.7494	19.1745	23.3994	12.9997	13.6497	14.2996
1013	17.5496	9.42476	14.9496	15.2746	22.7494	19.1745	23.3994	13.3247	13.9747	14.2996
1014	17.8746	9.42476	13.6497	15.2746	23.0744	19.1745	23.3994	13.3247	13.6497	13.9747
1015	18.1995	9.74976	14.9496	15.2746	22.7494	19.1745	23.3994	13.3247	13.6497	14.2996
1016	17.5496	9.74976	14.2996	15.5996	23.0744	19.1745	23.7244	12.9997	13.6497	14.6246
1017	18.1995	9.42476	14.9496	14.9496	22.7494	19.1745	23.3994	12.9997	13.9747	14.2996
1018	17.8746	9.42476	14.9496	14.9496	22.7494	19.4995	23.3994	13.6497	13.9747	14.2996
1019	17.8746	9.74976	14.2996	15.2746	22.7494	19.1745	23.3994	12.9997	13.9747	14.6246
1020	17.8746	9.42476	14.9496	15.2746	22.7494	19.1745	23.7244	12.9997	13.3247	14.6246
1021	17.8746	10.0747	14.9496	15.2746	23.0744	19.4995	23.3994	13.3247	13.9747	14.2996
1022	17.5496	9.42476	15.2746	15.2746	23.0744	19.1745	23.3994	13.3247	13.6497	14.6246
1023	17.8746	9.74976	14.9496	15.2746	23.0744	19.1745	23.7244	12.9997	13.6497	14.2996
1024	17.8746	9.74976	13.9747	15.2746	23.0744	19.1745	23.7244	13.3247	13.6497	14.6246
1025	17.8746	9.42476	14.2996	15.2746	23.0744	18.8495	23.3994	13.6497	13.6497	14.6246
1026	17.5496	9.42476	14.9496	15.5996	22.7494	19.4995	23.3994	13.6497	13.9747	14.6246
1027	17.8746	9.09977	14.2996	15.5996	22.7494	18.8495	23.7244	13.3247	13.9747	14.6246
1028	17.8746	9.09977	15.2746	15.2746	22.7494	19.1745	24.0494	13.3247	13.9747	14.2996
1029	17.8746	9.74976	14.9496	14.9496	22.7494	18.8495	23.3994	13.3247	13.6497	14.6246
1030	17.8746	9.74976	13.9747	15.2746	22.7494	18.8495	24.0494	13.6497	13.9747	14.6246
1031	17.5496	9.42476	15.2746	15.2746	22.7494	18.8495	23.7244	13.3247	13.6497	14.2996
1032	17.5496	9.74976	14.6246	15.2746	22.7494	18.8495	23.0744	13.3247	13.9747	14.6246
1033	17.8746	9.74976	14.6246	14.9496	23.0744	18.8495	23.3994	12.9997	13.6497	14.9496
1034	17.8746	9.42476	14.2996	14.9496	22.7494	18.8495	23.0744	12.9997	13.9747	14.6246
1035	18.1995	10.0747	14.2996	15.5996	23.0744	18.8495	23.7244	13.3247	13.9747	14.2996
1036	17.8746	9.09977	14.6246	15.5996	22.7494	19.1745	23.3994	13.3247	13.6497	14.6246
1037	18.1995	9.74976	14.9496	15.2746	23.0744	18.8495	23.3994	12.9997	14.2996	14.6246
1038	18.5245	9.42476	14.6246	14.9496	22.7494	19.1745	23.3994	13.3247	13.9747	14.2996
1039	17.8746	9.09977	14.2996	15.2746	22.7494	18.8495	23.3994	13.3247	13.9747	14.6246
1040	17.8746	9.42476	14.2996	15.2746	22.7494	19.1745	22.7494	12.9997	13.9747	14.6246
1041	17.8746	9.09977	14.6246	15.5996	22.7494	19.1745	23.7244	13.3247	13.9747	14.2996
1042	18.1995	9.09977	14.9496	15.5996	23.0744	19.1745	23.3994	13.3247	13.9747	14.6246
1043	18.1995	9.74976	14.9496	15.5996	22.7494	18.8495	23.3994	12.9997	13.6497	14.6246
1044	17.8746	9.42476	14.9496	15.2746	22.7494	18.8495	23.3994	13.3247	14.2996	14.6246
1045	17.8746	9.42476	14.2996	15.5996	22.7494	18.8495	23.3994	13.3247	13.6497	14.6246
1046	17.5496	9.74976	13.6497	15.5996	23.0744	18.8495	23.0744	13.3247	13.9747	14.2996
1047	17.8746	9.42476	13.9747	15.2746	22.7494	18.8495	23.3994	12.9997	13.9747	14.2996
1048	17.8746	9.09977	14.9496	15.2746	23.0744	19.1745	23.7244	12.9997	14.2996	14.6246
1049	17.8746	9.74976	15.2746	15.5996	23.0744	19.1745	23.3994	13.3247	13.9747	14.2996
1050	17.8746	8.77478	14.2996	15.2746	23.0744	18.8495	23.3994	12.9997	13.9747	14.6246
1051	18.1995	9.74976	14.9496	15.2746	23.0744	18.8495	23.0744	13.3247	13.9747	14.2996
1052	18.1995	9.09977	14.6246	14.9496	22.7494	18.8495	23.3994	12.9997	13.9747	14.2996
1053	17.5496	9.42476	14.2996	15.2746	22.7494	18.8495	23.0744	13.3247	13.9747	14.2996
1054	17.8746	9.74976	14.2996	15.2746	22.7494	19.4995	23.0744	12.9997	14.2996	14.2996
1055	17.5496	9.42476	14.6246	15.2746	22.7494	19.4995	23.3994	13.3247	13.9747	14.2996
1056	17.8746	9.09977	13.6497	15.2746	22.7494	19.1745	23.0744	12.9997	13.9747	14.6246
1057	17.8746	9.74976	14.2996	15.5996	22.7494	19.1745	23.7244	13.3247	13.9747	14.2996
1058	17.5496	9.42476	14.2996	15.2746	23.0744	18.8495	23.0744	12.9997	13.9747	14.6246
1059	17.8746	9.09977	14.2996	15.2746	23.0744	19.1745	23.3994	13.6497	14.2996	14.6246
1060	17.8746	9.09977	14.9496	15.2746	22.7494	18.8495	23.3994	12.9997	13.9747	14.2996
1061	17.8746	9.42476	13.9747	15.5996	22.7494	18.8495	23.7244	13.3247	14.2996	14.9496
1062	17.8746	9.09977	13.9747	15.5996	23.0744	19.4995	23.7244	13.3247	13.9747	14.6246
1063	18.1995	8.77478	14.6246	15.2746	22.7494	19.1745	23.3994	12.9997	13.9747	14.6246
1064	17.5496	8.77478	13.9747	14.9496	22.7494	19.4995	23.7244	13.6497	13.9747	14.2996
1065	17.8746	8.44979	13.9747	15.2746	22.7494	18.8495	23.3994	13.3247	13.9747	14.2996
1066	17.8746	8.77478	14.2996	15.2746	23.0744	18.8495	23.3994	13.3247	13.6497	14.6246
1067	18.1995	9.74976	13.9747	14.9496	22.7494	18.8495	23.0744	12.9997	14.2996	14.2996
1068	17.5496	9.09977	14.2996	15.2746	22.7494	18.8495	23.0744	13.6497	13.9747	14.2996
1069	17.8746	9.74976	13.9747	15.5996	22.7494	19.1745	23.0744	13.3247	13.9747	14.6246
1070	17.8746	9.42476	14.2996	15.9246	23.0744	18.8495	23.3994	13.3247	13.9747	14.9496
1071	17.8746	9.74976	14.2996	15.5996	23.0744	19.1745	23.0744	13.3247	14.2996	14.6246
1072	17.8746	9.42476	13.9747	15.9246	23.0744	19.4995	23.3994	12.9997	13.9747	14.9496
1073	17.5496	9.74976	14.6246	15.9246	23.0744	19.1745	23.3994	12.9997	14.2996	14.9496
1074	17.5496	10.0747	14.2996	15.2746	22.7494	19.1745	23.7244	13.3247	13.3247	14.2996
1075	18.1995	9.74976	14.2996	15.9246	23.0744	19.1745	23.3994	13.3247	13.9747	14.6246
1076	17.8746	9.74976	14.2996	15.9246	22.7494	19.1745	23.3994	12.9997	13.3247	14.6246
1077	18.1995	9.74976	14.6246	15.5996	22.7494	19.1745	23.0744	12.9997	13.6497	14.9496
1078	17.8746	9.42476	14.2996	15.9246	22.7494	19.1745	23.0744	13.3247	13.3247	14.2996
1079	18.5245	9.42476	13.9747	15.9246	23.0744	19.1745	23.3994	13.3247	13.3247	14.2996
1080	17.8746	9.09977	13.9747	15.5996	22.7494	19.1745	23.0744	12.9997	13.3247	14.2996
1081	17.8746	9.42476	13.9747	15.5996	22.7494	19.1745	23.3994	13.3247	13.3247	14.6246
[truncated: 750 more rows]

## Sheet: BIBP3226
Stimulation
[truncated: 1,833 more rows]
