# Supplementary material for: Elevated pyramidal cell firing orchestrates arteriolar vasoconstriction through COX-2-derived prostaglandin E2 signaling
Source: eLife. 2025 Apr 23;13:RP102424. doi: 10.7554/eLife.102424 (PMC12017770; doi:10.7554/eLife.102424)
Supplement: Table 1—source data 1. [file elife-102424-table1-data1.xlsx]

## Sheet: metrics
vessel	condition	resting_stability	wall_thickness	auc	max_dt_t0
BGBV-225	1 Hz	0.0158719	4.67021	0.476423	0.00063
BGBV-227	1 Hz	0.00650571	5.05297	0.0223252	0.00412
BGBV-229	1 Hz	0.0161865	3.09767	0.489734	0.001
BGBV-230	1 Hz	0.00943446	1.73481	0.908329	0.0019
BGBV-198	2 Hz	0.00885272	4.43964	1.73876	0.00504
BGBV-203	2 Hz	0.0200402	2.47434	-0.318034	0.00187
BGBV-208	2 Hz	0.0187596	4.85049	-3.71073	0.00521
BGBV-212	2 Hz	0.0145535	4.96058	0.13471	0.00048
BGBV-213	2 Hz	0.0320265	2.94181	2.27199	0.0008
BGBV-358	2 Hz	0.0160449	3.535	-0.411126	0.01051
BGBV-359	2 Hz	0.015138	4.3875	-0.271271	0.00858
BGBV-360	2 Hz	0.0102583	2.4375	0.970752	0.00955
BGBV-363	2 Hz	0.0116321	4.1435	-0.267033	0.01195
BGBV-364	2 Hz	0.00993808	4.225	-0.121111	0.00953738
BGBV-199	5 Hz	0.00997111	2.61232	-0.602703	0.03722
BGBV-202	5 Hz	0.0188209	4.85211	-1.91503	0.01572
BGBV-207	5 Hz	0.0127394	1.50944	5.16969	0.00729
BGBV-211	5 Hz	0.0249244	2.4953	0.142234	0.0141
BGBV-214	5 Hz	0.0114052	2.84287	-0.896964	0.00642
BGBV-223	5 Hz	0.0175601	4.69327	-0.91271	0.01637
BGBV-200	10 Hz	0.00990138	6.57151	1.74367	0.00346
BGBV-205	10 Hz	0.0113229	5.1054	-4.0501	0.00344
BGBV-206	10 Hz	0.0149214	2.45131	-2.93786	0.00149
BGBV-209	10 Hz	0.0191566	2.8578	-0.245021	0.01111
BGBV-210	10 Hz	0.0112529	3.44654	-3.02502	0.00223
BGBV-075	20 Hz	0.013133	3.95821	-4.74312	0.01299
BGBV-106	20 Hz	0.00810187	6.07001	-4.09452	0.01201
BGBV-117	20 Hz	0.00523429	3.31	-3.71599	0.00521
BGBV-134	20 Hz	0.00424846	3.5	-4.26237	0.00924
BGBV-253	20 Hz	0.0130332	4.24399	-0.70964	0.01368
BGBV-333	20 Hz	0.0122674	4.78856	-1.16972	0.00703
BGBV-334	20 Hz	0.0130516	3.135	-5.48008	0.00573
BGBV-355	20 Hz	0.0104444	4.55	-2.73633	0.00719
BGBV-407	20 Hz	0.0104209	4.496	-8.35091	0.00554
BGBV-417	20 Hz	0.00759324	3.3585	-1.97337	0.00555
