# Supplementary material for: Elevated pyramidal cell firing orchestrates arteriolar vasoconstriction through COX-2-derived prostaglandin E2 signaling
Source: eLife. 2025 Apr 23;13:RP102424. doi: 10.7554/eLife.102424 (PMC12017770; doi:10.7554/eLife.102424)
Supplement: Table 2—source data 1. [file elife-102424-table2-data1.xlsx]

## Sheet: All pyramidal cells
Cell Id	Specy	Gender	Strain	Date of birth	Date of Experiment	Age	Environement	Anesthesia	Cell type	Sampling rate (kHz)	Vp (mV)	RMP (mV)	Rin (MW)	tIC (ms)	Cm (pF)	Rhyp ( / MW)	Rsag (W)	DG sag (%)	Rheobase (pA)	1st spike delay (ms)	mthreshold (Hz/s)	Cthreshold (Hz)	Hump (mV)	Asat (Hz)	tsat (ms)	Csat (Hz)	msat (Hz/s)	A1 (mV)	AHP1f (mV)	ADP1 (mV)	AHP1s (mV)	TAHP1f (ms)	TADP1 (ms)	TAHP1s (ms)	D1 (ms)	A2 (mV)	AHP2f (mV)	ADP2 (mV)	AHP2s (mV)	TAHP2f (ms)	TADP2 (ms)	TAHP2s (ms)	D2 (ms)	Amp. Red.	Dur. Inc.	VGluT1	GADs	GAD65	GAD67
BG103	Mouse	Femelle	C57bl/6	2019-01-17	2019-02-05	19	Regular	isoflurane	pyramidal	50	-65.9	-81.2547	594.133	54.5425	91.8018	0.419212	0.378065	0.0981532	33.8524	281.35	-5.58734	9.35638	4.063	53.1795	24.0886	27.8601	-14.4695	94.683	-11.902	0	-18.922	10.54	0	48.3	1.66	92.015	-14.917	0	-21.498	12.96	0	47.53	1.77	0.0281782	0.0662651	1	0	0	0
BG104	Mouse	Femelle	C57bl/6	2019-01-17	2019-02-05	19	Regular	isoflurane	pyramidal	50	-78.5	-93.8547	108.96	14.1383	129.757	0.138145	0.135111	0.0219624	124.091	392.53	-6.3267	10.296	20.963	93.5144	19.6217	30.3425	-15.5323	95.129	-4.657	0	-12.549	13.72	0	62.86	1.85	91.95	-5.731	0	-14.865	10.38	0	77.84	1.91	0.0334178	0.0324324	1	0	0	0
BG105	Mouse	Femelle	C57bl/6	2019-01-17	2019-02-05	19	Regular	isoflurane	pyramidal	50	-78.3	-93.6547	325.47	40.2176	123.568	0.249504	0.219493	0.120283	53.9343	143.09	-6.29475	7.7021	16.58	93.8742	25.8658	22.9733	-5.35548	85.072	-6.671	0	-12.805	7.48	0	65.65	1.69	83.461	-10.797	0	-15.509	13.82	0	64.04	1.82	0.0189369	0.0769231	1	0	0	0
BG106	Mouse	Femelle	C57bl/6	2019-01-17	2019-02-05	19	Regular	isoflurane	pyramidal	50	-80.5	-95.8547	247.94	31.9339	128.797	0.204801	0.194373	0.0509177	94.1588	156.7	-2.86218	4.95295	32.914	114.185	34.0519	36.5349	-14.638	92.535	-10.26	0	-17.23	6.14	0	35.55	1.81	92.362	-8.691	0	-17.867	5.9	0	38.17	1.9	0.00186956	0.0497238	1	0	0	0
BG107	Mouse	Femelle	C57bl/6	2019-01-17	2019-02-05	19	Regular	isoflurane	pyramidal	50	-63.5	-78.8547	372.93	45.7015	122.547	0.308115	0.278062	0.0975383	33.9218	449.81	-1.89252	4.16112	15.979	74.5568	28.4727	21.7767	-5.70948	89.829	-8.875	0	-15.271	7.31	0	56.17	1.79	87.701	-9.1	0	-17.45	7.29	0	57.5	1.83	0.0236895	0.0223464	1	0	0	0
BG110	Mouse	Mâle	C57bl/6	2019-01-17	2019-02-06	20	Regular	isoflurane	pyramidal	50	-66.4	-81.7547	336.48	61.5374	182.886	0.287955	0.2493	0.13424	38.8782	161.71	-2.7771	5.60718	32.398	123.444	30.1885	28.2386	-7.91733	92.373	-9.363	0.525	-14.301	4.22	8.52	39.66	1.55	89.057	-11.56	0.006	-16.919	4.8	8.41	42.33	1.63	0.0358979	0.0516129	1	0	0	0
BG115	Mouse	Femelle	C57bl/6	2019-02-13	2019-03-04	19	Regular	isoflurane	pyramidal	50	-47.9	-63.2547	583.44	73.736	126.381	0.334409	0.306253	0.0841963	14.59	147.5	-3.02165	4.21159	15.669	69.8619	27.0476	24.7165	-13.1905	90.3	-9.967	0	-16.718	5.95	0	63.72	1.74	90.717	-10.095	0	-17.279	7.64	0	48.54	1.82	-0.00461794	0.045977	1	0	0	0
BG116	Mouse	Mâle	C57bl/6	2019-02-13	2019-03-05	20	Regular	isoflurane	pyramidal	50	-68.8	-84.1547	352.08	65.2847	185.426	0.272534	0.227543	0.165084	59.039	126.15	-1.24768	3.40948	29.972	74.1797	34.5815	16.847	0.399291	98.1	-6.254	0.983	-8.864	6.98	10.83	48.05	1.93	95.166	-6.256	0	-11.719	7.6	0	74.79	2.06	0.0299083	0.0673575	1	0	0	0
BG118	Mouse	Mâle	C57bl/6	2019-02-13	2019-03-05	20	Regular	isoflurane	pyramidal	50	-68	-83.3547	206.63	28.2712	136.82	0.220325	0.21712	0.0145467	59.0987	507.48	-0.816164	3.90839	18.216	56.22	24.3483	20.6899	-13.0781	87.318	-8.472	0	-11.918	8.59	0	44.81	2.02	83.979	-8.795	0	-13.384	7.58	0	47.18	2.12	0.0382395	0.049505	1	0	0	0
BG122	Mouse	Femelle	C57bl/6	2019-03-04	2019-03-21	17	Regular	isoflurane	pyramidal	50	-54.2	-69.5547	404.71	71.7921	177.391	0.317885	0.223261	0.297667	19.4069	251.28	-7.37993	5.47825	17.137	53.011	18.0481	22.4968	-18.5466	93.23	-6.117	0.165	-9.834	12.24	13.15	67.75	1.93	89.542	-7.483	0	-14.718	9.38	0	82.26	2.09	0.0395581	0.0829016	1	0	0	0
BG123	Mouse	Femelle	C57bl/6	2019-03-04	2019-03-21	17	Regular	isoflurane	pyramidal	50	-56.6	-71.9547	347.09	60.2244	173.512	0.296413	0.270205	0.0884172	44.4373	66.21	-0.685677	5.54405	3.564	48.4569	25.3638	19.309	-10.3813	85.236	-10.358	0	-13.341	12.96	0	33.71	1.72	79.731	-10.516	0	-16.156	10.92	0	38.74	1.93	0.0645854	0.122093	1	0	0	0
BG126	Mouse	Femelle	C57bl/6	2019-03-04	2019-03-21	17	Regular	isoflurane	pyramidal	50	-62	-77.3547	534.7	66.8449	125.014	0.340172	0.320925	0.0565802	24.3577	254.97	-3.11233	5.55793	33.679	85.67	27.281	23.335	-1.17874	83.012	-7.965	0	-14.286	11.73	0	42.85	2.05	83.265	-7.074	0	-15.294	9.03	0	57.2	2.2	-0.00304775	0.0731707	1	0	0	0
BG127	Mouse	Mâle	C57bl/6	2019-03-04	2019-03-22	18	Regular	isoflurane	pyramidal	50	-71.6	-86.9547	207.42	50.5223	243.575	0.130624	0.126299	0.0331103	74.3665	144.4	-0.376317	3.77017	2.64	5.88295	117.539	12.8913	-8.95295	87.444	-7.77	0	-13.288	9.06	0	48.2	2.06	81.386	-10.669	0	-15.184	15.54	0	62.26	2.26	0.0692786	0.0970874	1	0	0	0
BG128	Mouse	Mâle	C57bl/6	2019-03-04	2019-03-22	18	Regular	isoflurane	pyramidal	50	-71.6	-86.9547	200.04	41.5867	207.892	0.177167	0.175495	0.00943742	84.0764	324.39	-1.63719	5.21648	0	4.63977	53.0252	20.004	-13.1585	96.847	-9.741	0	-17.212	7.94	0	49.43	1.72	91.925	-9.515	0	-17.908	9.01	0	48.4	1.79	0.0508224	0.0406977	1	0	0	0
BG130	Mouse	Mâle	C57bl/6	2019-03-04	2019-03-22	18	Regular	isoflurane	pyramidal	50	-71.2	-86.5547	286.64	44.7959	156.279	0.249669	0.234598	0.0603639	54.223	224.75	-2.59988	3.75799	16.412	84.5352	23.3299	28.5686	-18.3402	106.614	-7.3	0.766	-15.216	5.43	7.99	58.37	1.8	104.313	-8.942	0.129	-17.798	6.19	6.62	54.66	1.81	0.0215825	0.00555556	1	0	0	0
BG131	Mouse	Mâle	C57bl/6	2019-03-04	2019-03-22	18	Regular	isoflurane	pyramidal	50	-71.5	-86.8547	215.38	31.8118	147.701	0.220362	0.205224	0.0686961	74.3809	413.85	-2.34331	5.61794	12.593	70.231	23.4891	27.4496	-14.0812	101.384	-8.96	0	-15.405	6.78	0	46.65	1.68	99.537	-10.101	0	-16.281	8.93	0	57.36	1.7	0.0182179	0.0119048	1	0	0	0
[truncated: 12 more columns]

## Sheet: COX-1
Cell Id	Specy	Gender	Strain	Date of birth	Date of Experiment	Age	Environement	Anesthesia	Cell type	Sampling rate (kHz)	Vp (mV)	RMP (mV)	Rin (MW)	tIC (ms)	Cm (pF)	Rhyp ( / MW)	Rsag (W)	DG sag (%)	Rheobase (pA)	1st spike delay (ms)	mthreshold (Hz/s)	Cthreshold (Hz)	Hump (mV)	Asat (Hz)	tsat (ms)	Csat (Hz)	msat (Hz/s)	A1 (mV)	AHP1f (mV)	ADP1 (mV)	AHP1s (mV)	TAHP1f (ms)	TADP1 (ms)	TAHP1s (ms)	D1 (ms)	A2 (mV)	AHP2f (mV)	ADP2 (mV)	AHP2s (mV)	TAHP2f (ms)	TADP2 (ms)	TAHP2s (ms)	D2 (ms)	Amp. Red.	Dur. Inc.	VGluT1	GADs	GAD65	GAD67
BG106	Mouse	Femelle	C57bl/6	2019-01-17	2019-02-05	19	Regular	isoflurane	pyramidal	50	-80.5	-95.8547	247.94	31.9339	128.797	0.204801	0.194373	0.0509177	94.1588	156.7	-2.86218	4.95295	32.914	114.185	34.0519	36.5349	-14.638	92.535	-10.26	0	-17.23	6.14	0	35.55	1.81	92.362	-8.691	0	-17.867	5.9	0	38.17	1.9	0.00186956	0.0497238	1	0	0	0
BG107	Mouse	Femelle	C57bl/6	2019-01-17	2019-02-05	19	Regular	isoflurane	pyramidal	50	-63.5	-78.8547	372.93	45.7015	122.547	0.308115	0.278062	0.0975383	33.9218	449.81	-1.89252	4.16112	15.979	74.5568	28.4727	21.7767	-5.70948	89.829	-8.875	0	-15.271	7.31	0	56.17	1.79	87.701	-9.1	0	-17.45	7.29	0	57.5	1.83	0.0236895	0.0223464	1	0	0	0
BG126	Mouse	Femelle	C57bl/6	2019-03-04	2019-03-21	17	Regular	isoflurane	pyramidal	50	-62	-77.3547	534.7	66.8449	125.014	0.340172	0.320925	0.0565802	24.3577	254.97	-3.11233	5.55793	33.679	85.67	27.281	23.335	-1.17874	83.012	-7.965	0	-14.286	11.73	0	42.85	2.05	83.265	-7.074	0	-15.294	9.03	0	57.2	2.2	-0.00304775	0.0731707	1	0	0	0
BG130	Mouse	Mâle	C57bl/6	2019-03-04	2019-03-22	18	Regular	isoflurane	pyramidal	50	-71.2	-86.5547	286.64	44.7959	156.279	0.249669	0.234598	0.0603639	54.223	224.75	-2.59988	3.75799	16.412	84.5352	23.3299	28.5686	-18.3402	106.614	-7.3	0.766	-15.216	5.43	7.99	58.37	1.8	104.313	-8.942	0.129	-17.798	6.19	6.62	54.66	1.81	0.0215825	0.00555556	1	0	0	0
[truncated: 12 more columns]

## Sheet: COX-2
Cell Id	Specy	Gender	Strain	Date of birth	Date of Experiment	Age	Environement	Anesthesia	Cell type	Sampling rate (kHz)	Vp (mV)	RMP (mV)	Rin (MW)	tIC (ms)	Cm (pF)	Rhyp ( / MW)	Rsag (W)	DG sag (%)	Rheobase (pA)	1st spike delay (ms)	mthreshold (Hz/s)	Cthreshold (Hz)	Hump (mV)	Asat (Hz)	tsat (ms)	Csat (Hz)	msat (Hz/s)	A1 (mV)	AHP1f (mV)	ADP1 (mV)	AHP1s (mV)	TAHP1f (ms)	TADP1 (ms)	TAHP1s (ms)	D1 (ms)	A2 (mV)	AHP2f (mV)	ADP2 (mV)	AHP2s (mV)	TAHP2f (ms)	TADP2 (ms)	TAHP2s (ms)	D2 (ms)	Amp. Red.	Dur. Inc.	VGluT1	GADs	GAD65	GAD67
BG104	Mouse	Femelle	C57bl/6	2019-01-17	2019-02-05	19	Regular	isoflurane	pyramidal	50	-78.5	-93.8547	108.96	14.1383	129.757	0.138145	0.135111	0.0219624	124.091	392.53	-6.3267	10.296	20.963	93.5144	19.6217	30.3425	-15.5323	95.129	-4.657	0	-12.549	13.72	0	62.86	1.85	91.95	-5.731	0	-14.865	10.38	0	77.84	1.91	0.0334178	0.0324324	1	0	0	0
BG105	Mouse	Femelle	C57bl/6	2019-01-17	2019-02-05	19	Regular	isoflurane	pyramidal	50	-78.3	-93.6547	325.47	40.2176	123.568	0.249504	0.219493	0.120283	53.9343	143.09	-6.29475	7.7021	16.58	93.8742	25.8658	22.9733	-5.35548	85.072	-6.671	0	-12.805	7.48	0	65.65	1.69	83.461	-10.797	0	-15.509	13.82	0	64.04	1.82	0.0189369	0.0769231	1	0	0	0
BG115	Mouse	Femelle	C57bl/6	2019-02-13	2019-03-04	19	Regular	isoflurane	pyramidal	50	-47.9	-63.2547	583.44	73.736	126.381	0.334409	0.306253	0.0841963	14.59	147.5	-3.02165	4.21159	15.669	69.8619	27.0476	24.7165	-13.1905	90.3	-9.967	0	-16.718	5.95	0	63.72	1.74	90.717	-10.095	0	-17.279	7.64	0	48.54	1.82	-0.00461794	0.045977	1	0	0	0
BG123	Mouse	Femelle	C57bl/6	2019-03-04	2019-03-21	17	Regular	isoflurane	pyramidal	50	-56.6	-71.9547	347.09	60.2244	173.512	0.296413	0.270205	0.0884172	44.4373	66.21	-0.685677	5.54405	3.564	48.4569	25.3638	19.309	-10.3813	85.236	-10.358	0	-13.341	12.96	0	33.71	1.72	79.731	-10.516	0	-16.156	10.92	0	38.74	1.93	0.0645854	0.122093	1	0	0	0
BG127	Mouse	Mâle	C57bl/6	2019-03-04	2019-03-22	18	Regular	isoflurane	pyramidal	50	-71.6	-86.9547	207.42	50.5223	243.575	0.130624	0.126299	0.0331103	74.3665	144.4	-0.376317	3.77017	2.64	5.88295	117.539	12.8913	-8.95295	87.444	-7.77	0	-13.288	9.06	0	48.2	2.06	81.386	-10.669	0	-15.184	15.54	0	62.26	2.26	0.0692786	0.0970874	1	0	0	0
[truncated: 12 more columns]

## Sheet: no COX1_2
Cell Id	Specy	Gender	Strain	Date of birth	Date of Experiment	Age	Environement	Anesthesia	Cell type	Sampling rate (kHz)	Vp (mV)	RMP (mV)	Rin (MW)	tIC (ms)	Cm (pF)	Rhyp ( / MW)	Rsag (W)	DG sag (%)	Rheobase (pA)	1st spike delay (ms)	mthreshold (Hz/s)	Cthreshold (Hz)	Hump (mV)	Asat (Hz)	tsat (ms)	Csat (Hz)	msat (Hz/s)	A1 (mV)	AHP1f (mV)	ADP1 (mV)	AHP1s (mV)	TAHP1f (ms)	TADP1 (ms)	TAHP1s (ms)	D1 (ms)	A2 (mV)	AHP2f (mV)	ADP2 (mV)	AHP2s (mV)	TAHP2f (ms)	TADP2 (ms)	TAHP2s (ms)	D2 (ms)	Amp. Red.	Dur. Inc.	VGluT1	GADs	GAD65	GAD67
BG103	Mouse	Femelle	C57bl/6	2019-01-17	2019-02-05	19	Regular	isoflurane	pyramidal	50	-65.9	-81.2547	594.133	54.5425	91.8018	0.419212	0.378065	0.0981532	33.8524	281.35	-5.58734	9.35638	4.063	53.1795	24.0886	27.8601	-14.4695	94.683	-11.902	0	-18.922	10.54	0	48.3	1.66	92.015	-14.917	0	-21.498	12.96	0	47.53	1.77	0.0281782	0.0662651	1	0	0	0
BG110	Mouse	Mâle	C57bl/6	2019-01-17	2019-02-06	20	Regular	isoflurane	pyramidal	50	-66.4	-81.7547	336.48	61.5374	182.886	0.287955	0.2493	0.13424	38.8782	161.71	-2.7771	5.60718	32.398	123.444	30.1885	28.2386	-7.91733	92.373	-9.363	0.525	-14.301	4.22	8.52	39.66	1.55	89.057	-11.56	0.006	-16.919	4.8	8.41	42.33	1.63	0.0358979	0.0516129	1	0	0	0
BG116	Mouse	Mâle	C57bl/6	2019-02-13	2019-03-05	20	Regular	isoflurane	pyramidal	50	-68.8	-84.1547	352.08	65.2847	185.426	0.272534	0.227543	0.165084	59.039	126.15	-1.24768	3.40948	29.972	74.1797	34.5815	16.847	0.399291	98.1	-6.254	0.983	-8.864	6.98	10.83	48.05	1.93	95.166	-6.256	0	-11.719	7.6	0	74.79	2.06	0.0299083	0.0673575	1	0	0	0
BG118	Mouse	Mâle	C57bl/6	2019-02-13	2019-03-05	20	Regular	isoflurane	pyramidal	50	-68	-83.3547	206.63	28.2712	136.82	0.220325	0.21712	0.0145467	59.0987	507.48	-0.816164	3.90839	18.216	56.22	24.3483	20.6899	-13.0781	87.318	-8.472	0	-11.918	8.59	0	44.81	2.02	83.979	-8.795	0	-13.384	7.58	0	47.18	2.12	0.0382395	0.049505	1	0	0	0
BG122	Mouse	Femelle	C57bl/6	2019-03-04	2019-03-21	17	Regular	isoflurane	pyramidal	50	-54.2	-69.5547	404.71	71.7921	177.391	0.317885	0.223261	0.297667	19.4069	251.28	-7.37993	5.47825	17.137	53.011	18.0481	22.4968	-18.5466	93.23	-6.117	0.165	-9.834	12.24	13.15	67.75	1.93	89.542	-7.483	0	-14.718	9.38	0	82.26	2.09	0.0395581	0.0829016	1	0	0	0
BG128	Mouse	Mâle	C57bl/6	2019-03-04	2019-03-22	18	Regular	isoflurane	pyramidal	50	-71.6	-86.9547	200.04	41.5867	207.892	0.177167	0.175495	0.00943742	84.0764	324.39	-1.63719	5.21648	0	4.63977	53.0252	20.004	-13.1585	96.847	-9.741	0	-17.212	7.94	0	49.43	1.72	91.925	-9.515	0	-17.908	9.01	0	48.4	1.79	0.0508224	0.0406977	1	0	0	0
BG131	Mouse	Mâle	C57bl/6	2019-03-04	2019-03-22	18	Regular	isoflurane	pyramidal	50	-71.5	-86.8547	215.38	31.8118	147.701	0.220362	0.205224	0.0686961	74.3809	413.85	-2.34331	5.61794	12.593	70.231	23.4891	27.4496	-14.0812	101.384	-8.96	0	-15.405	6.78	0	46.65	1.68	99.537	-10.101	0	-16.281	8.93	0	57.36	1.7	0.0182179	0.0119048	1	0	0	0
[truncated: 12 more columns]
